# Supplementary material for: Transforming polygenic risk prediction: functional annotation and digital twin modeling with whole-exome sequencing
Source: Research Square preprint supplement (doi:10.21203/rs.3.rs-6169446/v1), 2025-03-10
Supplement: Supplementary file 1 [file 1355ae19541941d60d2ad06b.docx]

**Supplementary methodology**

**IAF Whole-genome sequencing**

DNA samples were randomly fragmented into 350 base-pair reads using Covaris technology. Subsequently, 3’-end repair was performed, followed by amplification through ligation-mediated polymerase chain reaction, single-strand separation, and cyclization. DNA Nanoball were then generated with rolling circle amplification and sequenced using the BGI-SEQ500 platform.

**Population structure analysis**

We performed population stratification analysis by applying a PCA on the UKB sequencing and array data jointly with the IAF whole-genome data, using the R package *flashpca* from FlashPCA228. We first performed quality control on the reference dataset (UKB) using PLINK115,116 by filtering variants at MAF > 1% and LD at r2 < 0.1. We then merged the reference (UKB) sequencing and genotype data with the target dataset (IAF) and retained common variants across sets. The final datasets for PC analysis included 200,673 samples and 8,201 SNPs for the WES-based dataset. For the array-based, the dataset included 487,489 samples and 66,063 SNPs.

For the UKB, population groups were identified by mapping the PCs using the reported ethnic grouping labels (Data field: 22006). To check for fine-scale population structure and potential outliers117, we UMAP to the 40 PCs from the merged IAF-UKB datasets using the R package *umap*118. We then retained individuals from the UKB that clustered with the individuals from the IAF cohort from the results of PC and UMAP analyses.

**Genotype quality control**

For association analyses and polygenic risk modeling, we applied stringent quality control to the genomic data of the reference dataset (UKB), following the recommendations by Chang (2020) and Marees et al. (2018). We first removed duplicated, multi-allelic variants, insertions, and deletions (INDELs). We retained SNPs located only on the autosomal chromosomes. Next, we removed samples and SNPs with missing information in a two-step manner. First, by removing samples and SNPs with missingness > 10% and then, from the remaining dataset, with > 1%. We then retained variants with MAF > 1% and removed SNPs that deviated from Hardy-Weinberg equilibrium (HWE). For HWE, we first removed variants with P-value < 5 × 10-10 and then with 5 × 10-6. To eliminate correlated genetic variants that could introduce biases in analyses122 33, we tagged all SNPs LD at r2 > 0.8 and performed LD-pruning by retaining variants with r2 < 0.1. We excluded genetically related individuals with KING kinship coefficient > 0.177, those with a heterozygosity rate greater than 3 standard deviations (SD) above the sample average, and those with discrepancies between genetic and self-reported sex. From the quality-controlled datasets, we then lifted over the sequencing data to the hg19 genome build using LiftOver from Picard toolkit123, to facilitate downstream analyses with the imputed array data. Finally, we annotated SNPs using VEP (v107)29 and kept SNPs with available dbSNP information to facilitate comparisons across platforms. A summary of the sample-level quality control performed on the WES reference dataset is shown in Figure S1.

**Methods for the estimation of PRSs**

We generated PRSs for the traits using five different approaches based on clumping and thresholding (PRSice2), Bayesian regression (LDpred2, RápidoPGS, PRS-CS), and penalized regression (lassosum2).

PRSice2 follows a clumping and thresholding approach, from which PRSs are estimated using SNPs not in LD or weakly correlated with a P-value above a significance threshold. We first clumped the target dataset by retaining SNPs with an r2 < 0.1 within a 250 kb window, using default parameters “--clump-r2 0.1” and “--clump-kb 250”. Then, we varied the P-values for thresholding from a minimum value of 5 × 10-8to 0.5, with a step-size increase of 5 × 10-5.

LDpred2 is a Bayesian approach that estimates posterior mean effects from the summary statistics by conditioning on a prior and accounting for LD between SNPs. We used three model configurations: an infinitesimal model (LDpred2-inf), which assumes a normal distribution of priors; a grid of models (LDpred2-grid), which provides a grid of values for the priors; and an automatic model (LDpred2-auto), which calculates the priors directly from the data using a Gibbs sampler. For each model, we estimated the LD correlation matrix from the target dataset and used the default parameters, following the recommendations from the developers.

Similar to LDpred2, PRS-CS uses a Bayesian regression approach but applies a continuous shrinkage prior to adjust the effect sizes of genetic variants. We specified default options to estimate the global shrinkage parameter directly from the data and used the pre-computed LD matrix from 1KG, which was provided by the developers. With the generated posterior SNP effect sizes, we used PLINK to calculate the PRSs for the target dataset using the “--score” option.

RápidoPGS operates within a Bayesian framework but employs fine-mapping approaches to estimate the summary statistics’ posterior mean effects and adjust the effect sizes. Priors for a true causal effect size are sample from a uniform distribution. We used the “rapidopgs_single” option to estimate the posterior effect sizes using default parameters. We then used PLINK to calculate the scores for the target datasets.

Lastly, lassosum2 uses a regularized regression model on the summary statistics, accounting for LD between variants. We estimated the LD correlation matrix from the target dataset and used default parameters with shrinkage parameters set at 0.001, 0.01, 0.1, and 1, along with a penalty parameter of 0.01.

**Supplementary Figures**


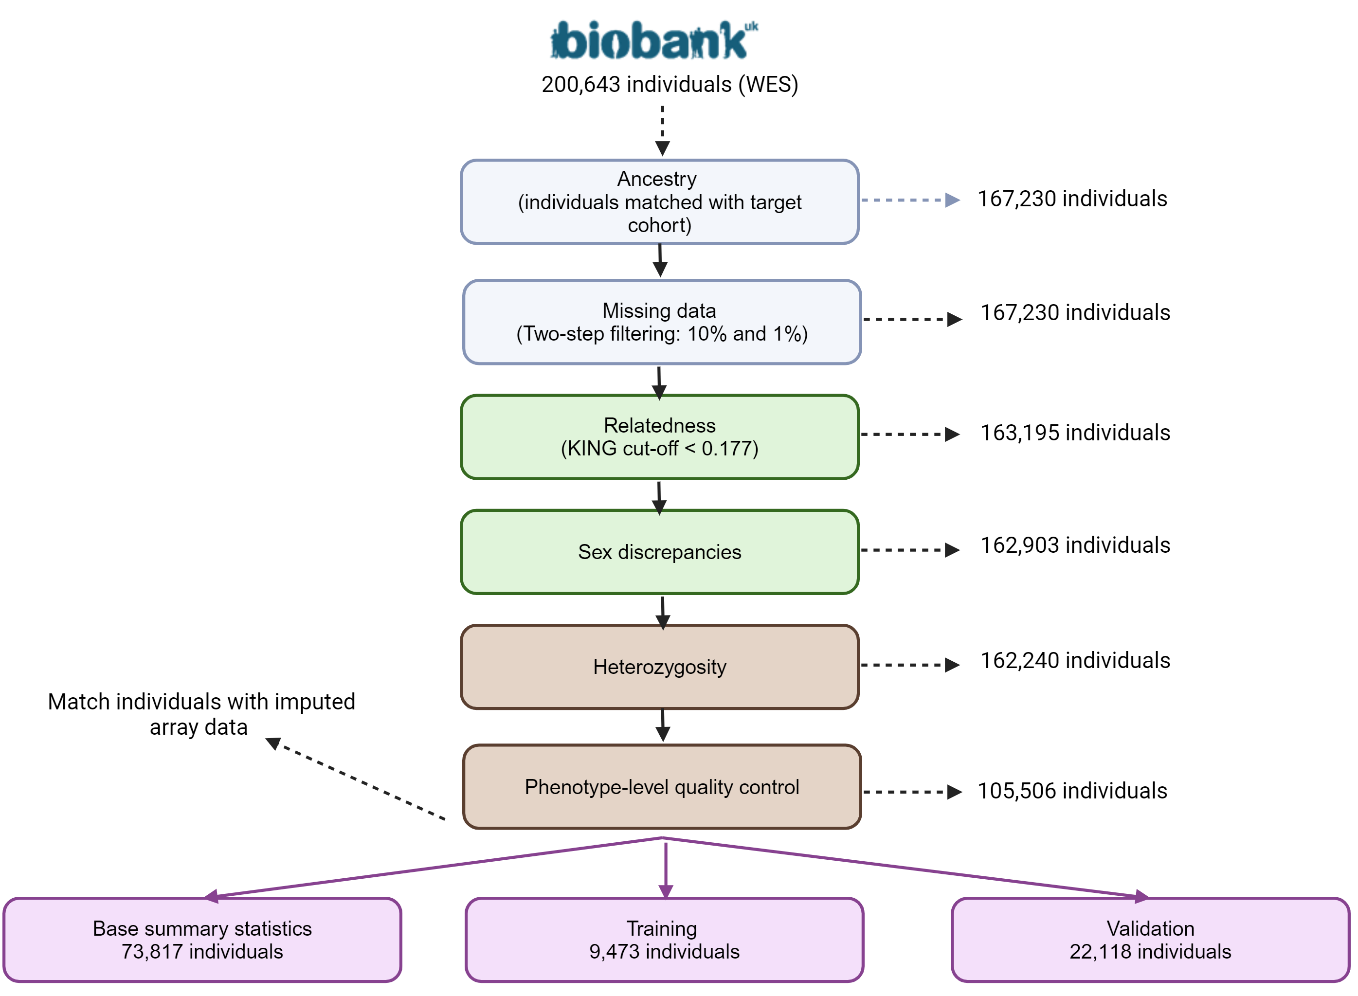


**Fig S1. Sample-level quality control of the exome-based reference dataset.** Overview of the sample-level processing of the WES base dataset (UK Biobank). For the imputed array base dataset, samples that passed WES quality control were retained for analyses.


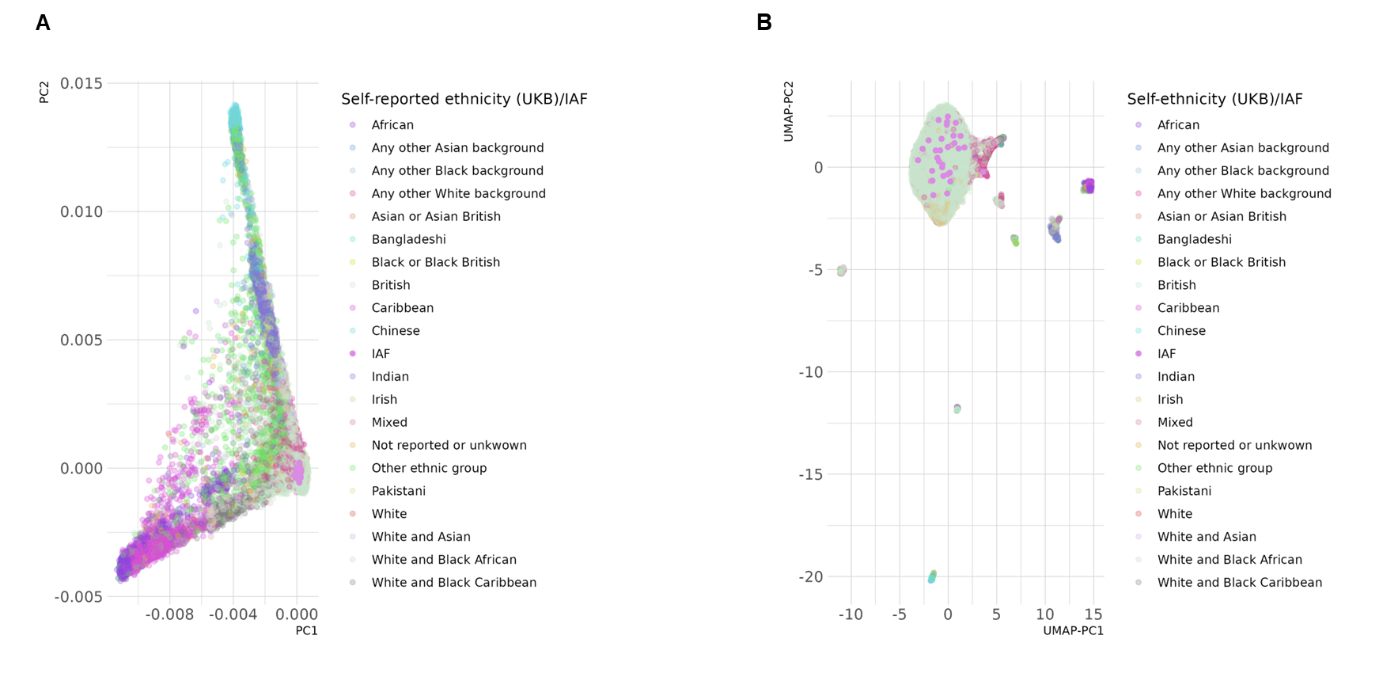


**Fig S2. Population structure analysis and fine-scale analysis for the reference (UKB) and target (IAF) sequencing datasets (NSamples = 487,439; NSNPs = 66,063). (A)** Principal component (PC) analysis for population structure. (**B)** UMAP analyses on the PCs for fine-scale population structure. Individuals from the target cohort clustered each other with the individuals self-reported as British which were retained for association and prediction analyses.


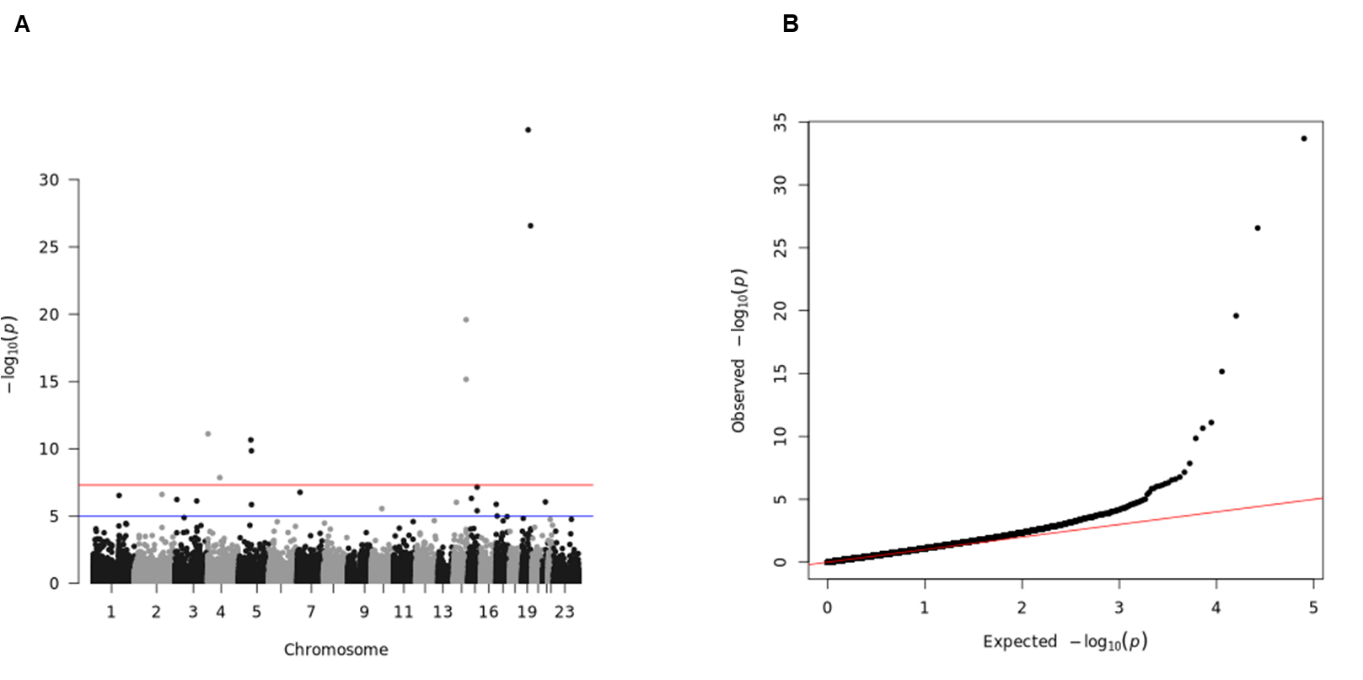


**Fig S3.** **Manhattan plot and Q-Q plot for the single-variant association test for ALB in WES base reference dataset (UKB**). (**A)** Manhattan plot. Blue line represents significance threshold at P-value < 0.05. Red line represents genome-wide significance threshold at P-value < 5E-08. (**B)** Q-Q plot.


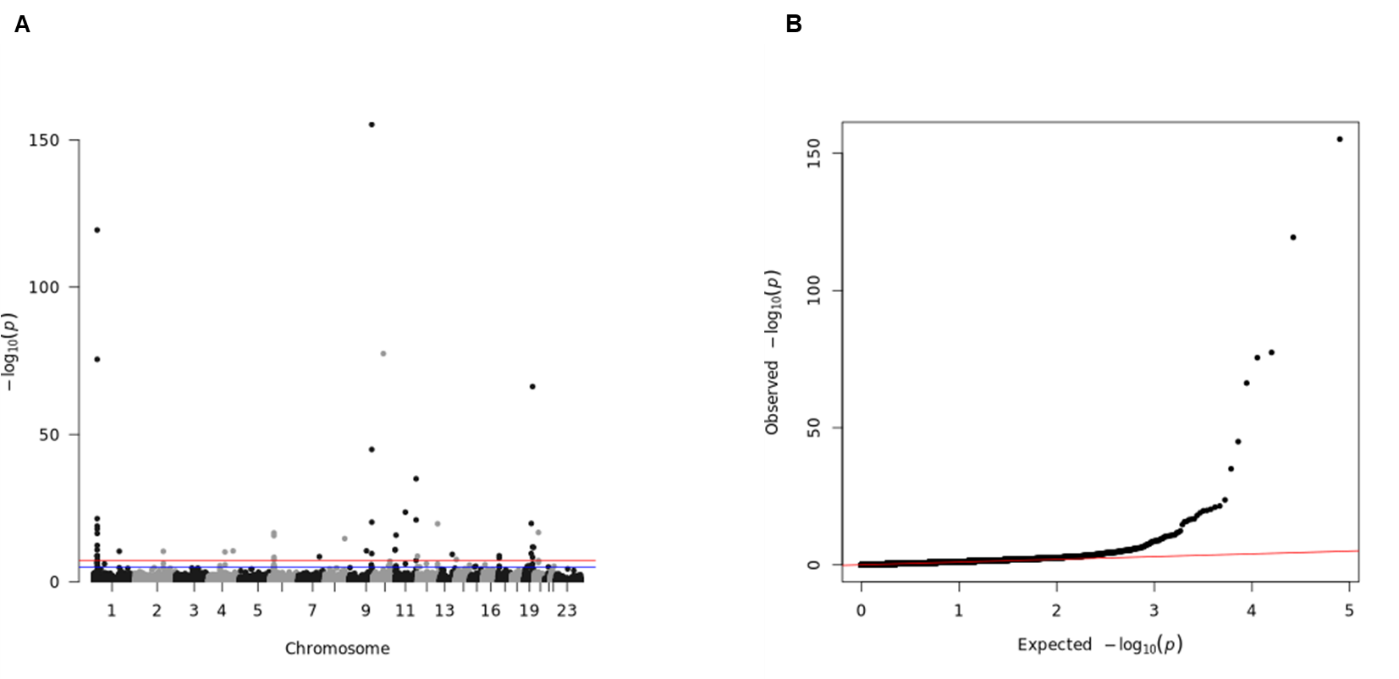


**Fig S4.** **Manhattan plot and Q-Q plot for the single-variant association test for ALP in the WES base reference dataset (UKB**). **(A)** Manhattan plot. Blue line represents significance threshold at P-value < 0.05. Red line represents genome-wide significance threshold at P-value < 5E-08. **(B)** Q-Q plot.


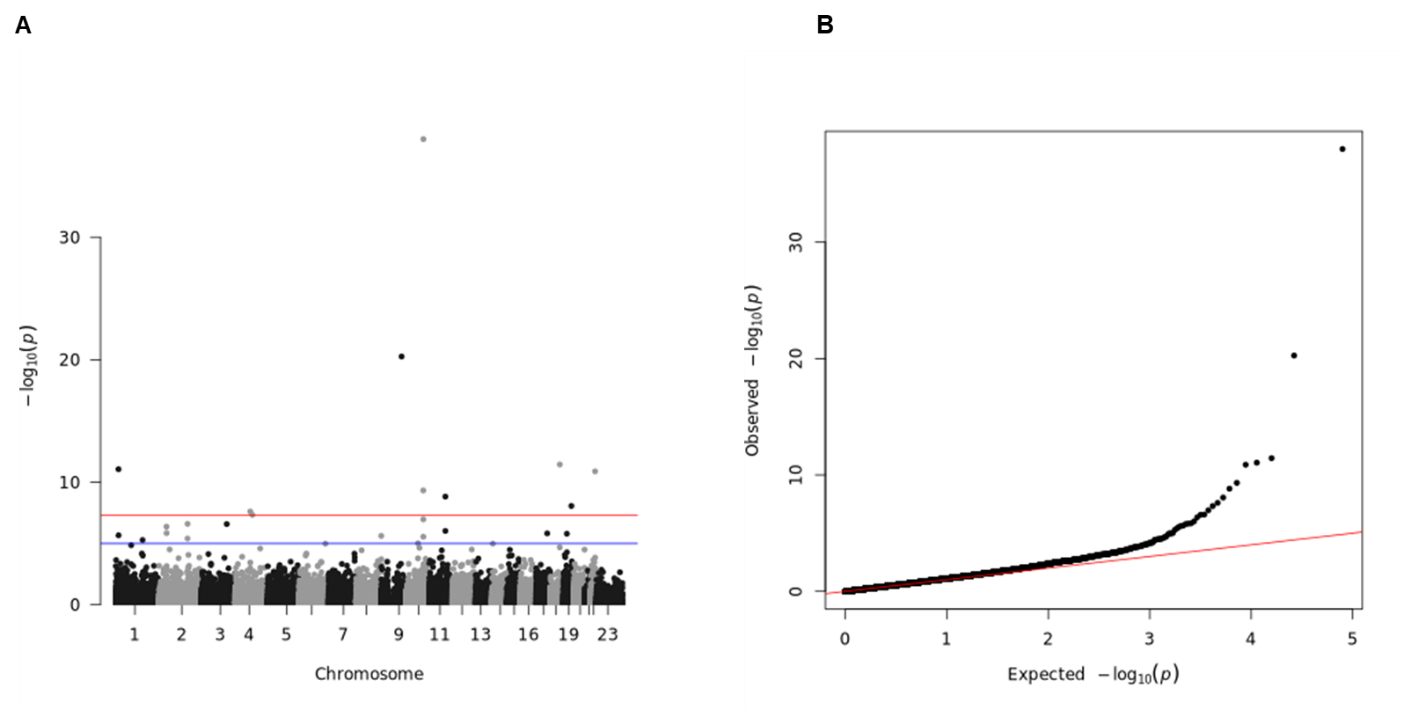


**Fig S5.** **Manhattan plot and Q-Q plot for the single-variant association test for ALT in the WES base reference dataset (UKB**). **(A)** Manhattan plot. Blue line represents significance threshold at P-value < 0.05. Red line represents genome-wide significance threshold at P-value < 5E-08. **(B)** Q-Q plot.


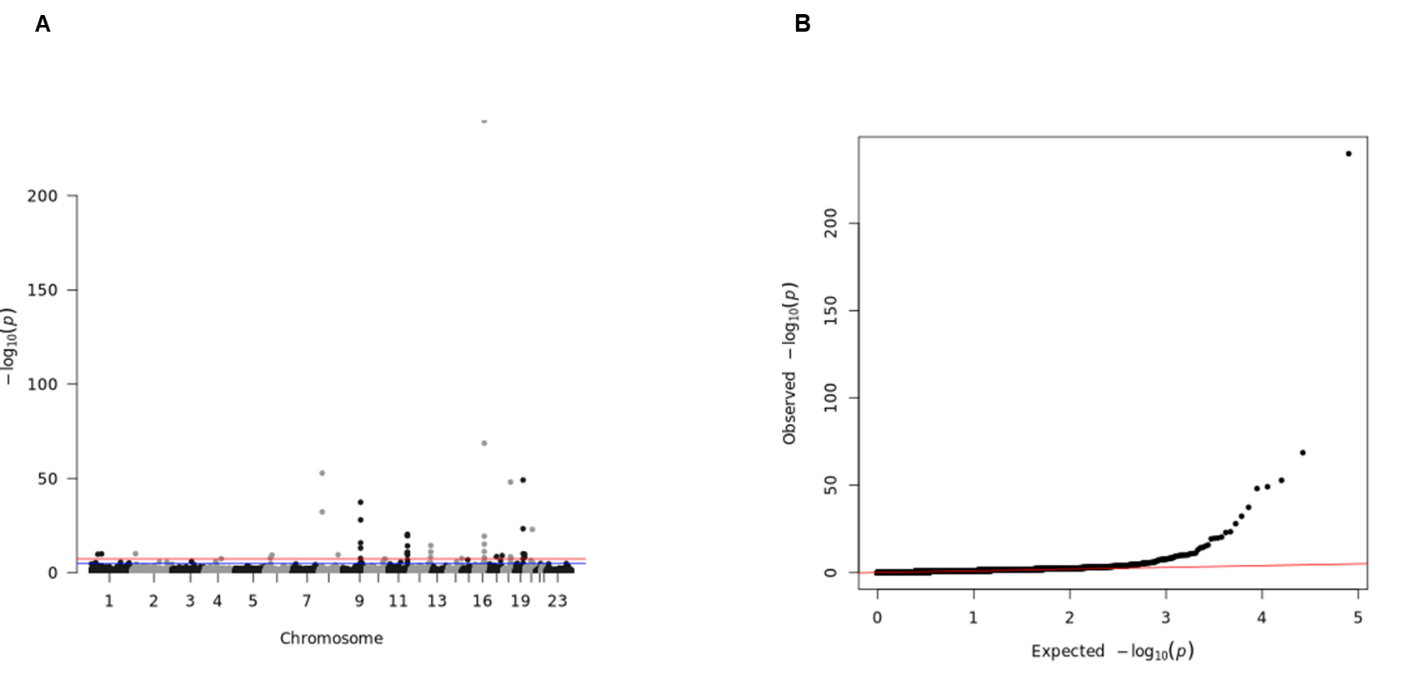


**Fig S6.** **Manhattan plot and Q-Q plot for the single-variant association test for APOA in the WES base reference dataset (UKB**). **(A)** Manhattan plot. Blue line represents significance threshold at P-value < 0.05. Red line represents genome-wide significance threshold at P-value < 5E-08. **(B)** Q-Q plot.


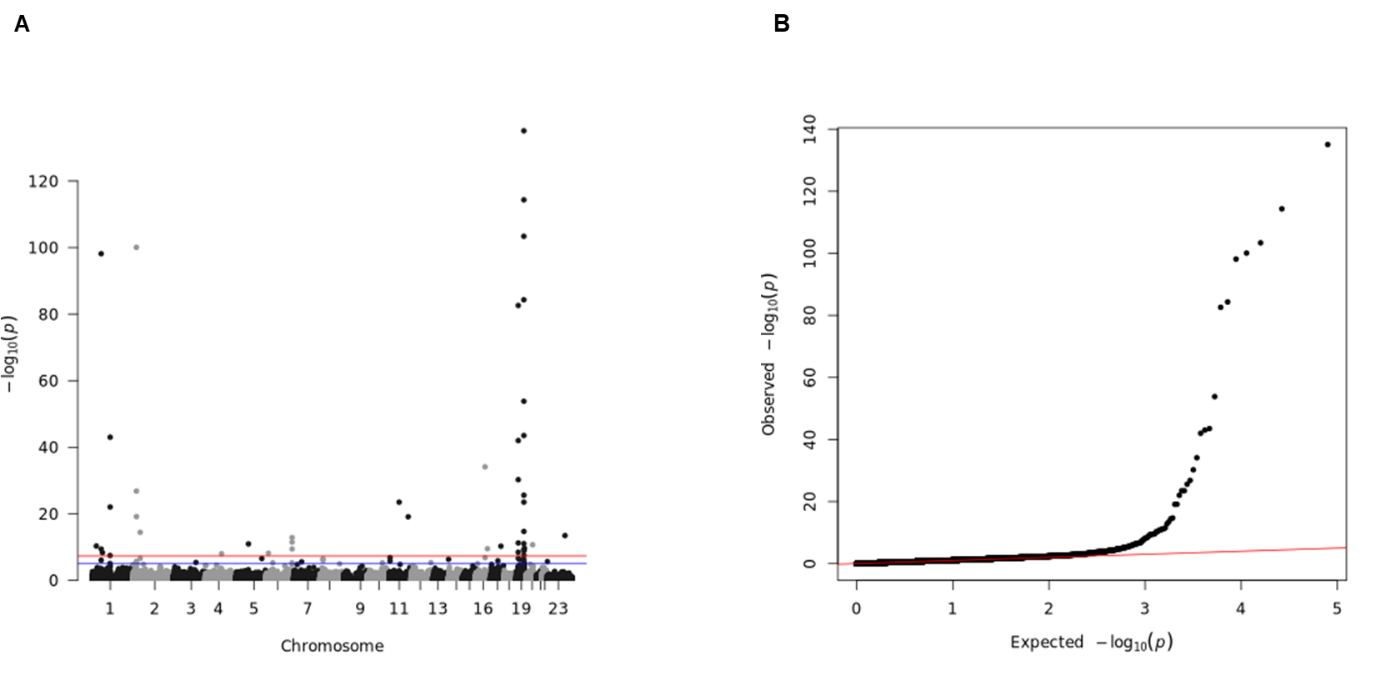


**Fig S7.** **Manhattan plot and Q-Q plot for the single-variant association test for APOB in the WES base reference dataset (UKB**). (**A)** Manhattan plot. Blue line represents significance threshold at P-value < 0.05. Red line represents genome-wide significance threshold at P-value < 5E-08. (**B)** Q-Q plot.


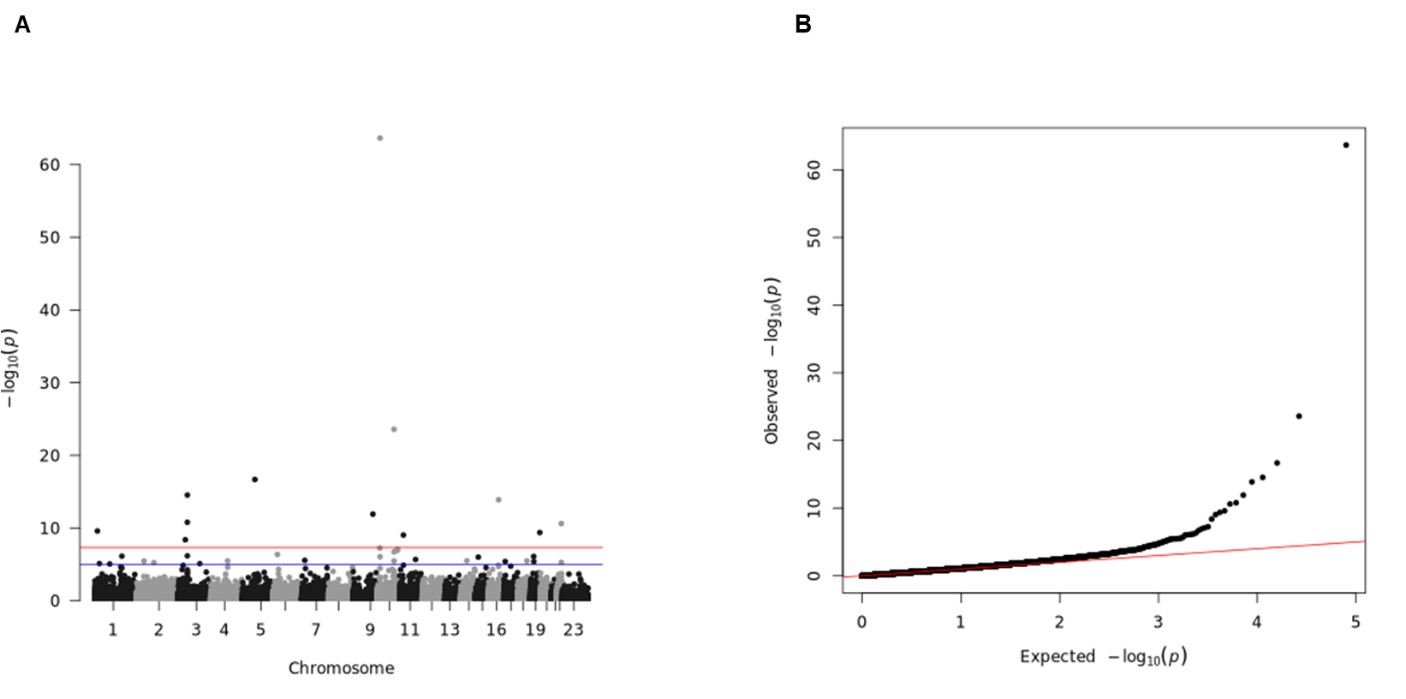


**Fig S8.** **Manhattan plot and Q-Q plot for the single-variant association test for AST in the WES base reference dataset (UKB**). (**A)** Manhattan plot. Blue line represents significance threshold at P-value < 0.05. Red line represents genome-wide significance threshold at P-value < 5E-08. (**B)** Q-Q plot.


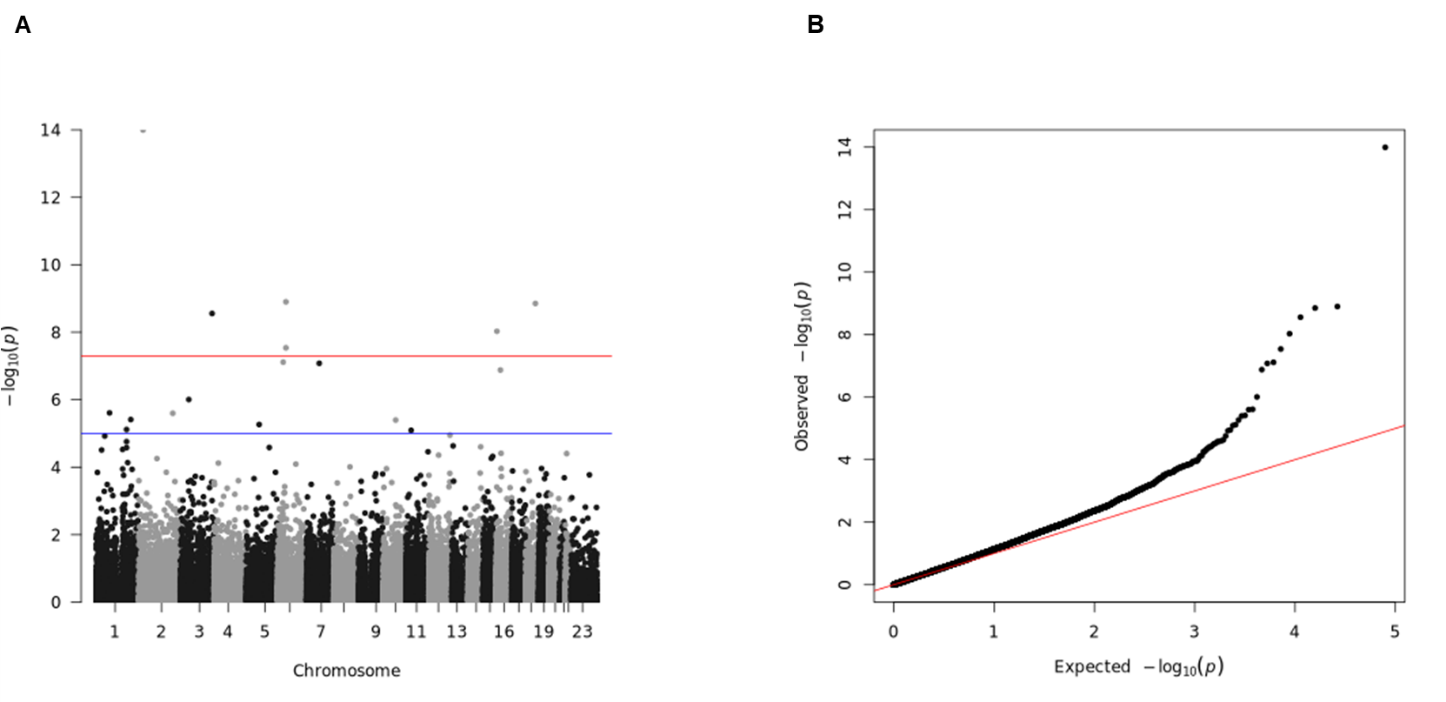


**Fig S9.** **Manhattan plot and Q-Q plot for the single-variant association test for BMI in the WES base reference dataset (UKB**). (**A)** Manhattan plot. Blue line represents significance threshold at P-value < 0.05. Red line represents genome-wide significance threshold at P-value < 5E-08. (**B)** Q-Q plot.


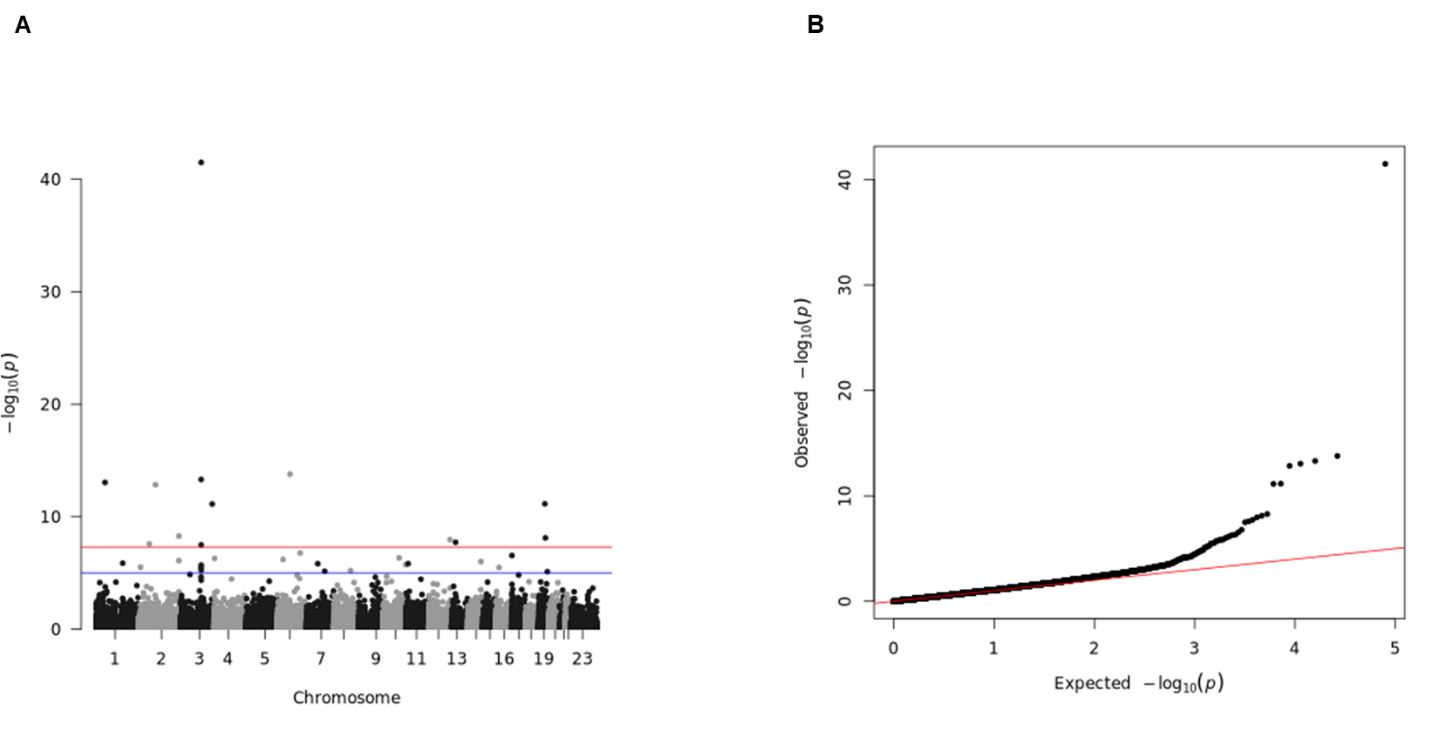


**Fig S10.** **Manhattan plot and Q-Q plot for the single-variant association test for CAL in the WES base reference dataset (UKB**). (**A)** Manhattan plot. Blue line represents significance threshold at P-value < 0.05. Red line represents genome-wide significance threshold at P-value < 5E-08. (**B)** Q-Q plot.


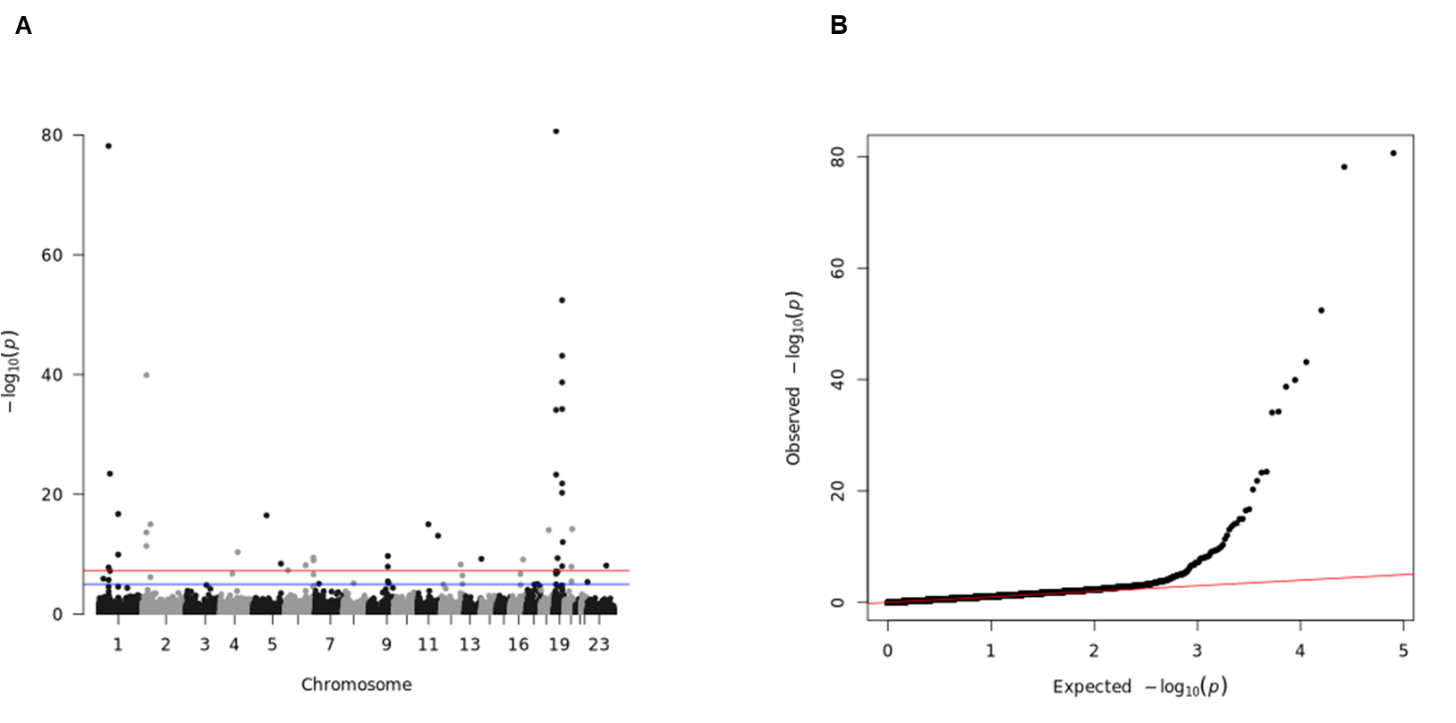


**Fig S11.** **Manhattan plot and Q-Q plot for the single-variant association test for CHO in the WES base reference dataset (UKB**). (**A)** Manhattan plot. Blue line represents significance threshold at P-value < 0.05. Red line represents genome-wide significance threshold at P-value < 5E-08. (**B)** Q-Q plot.


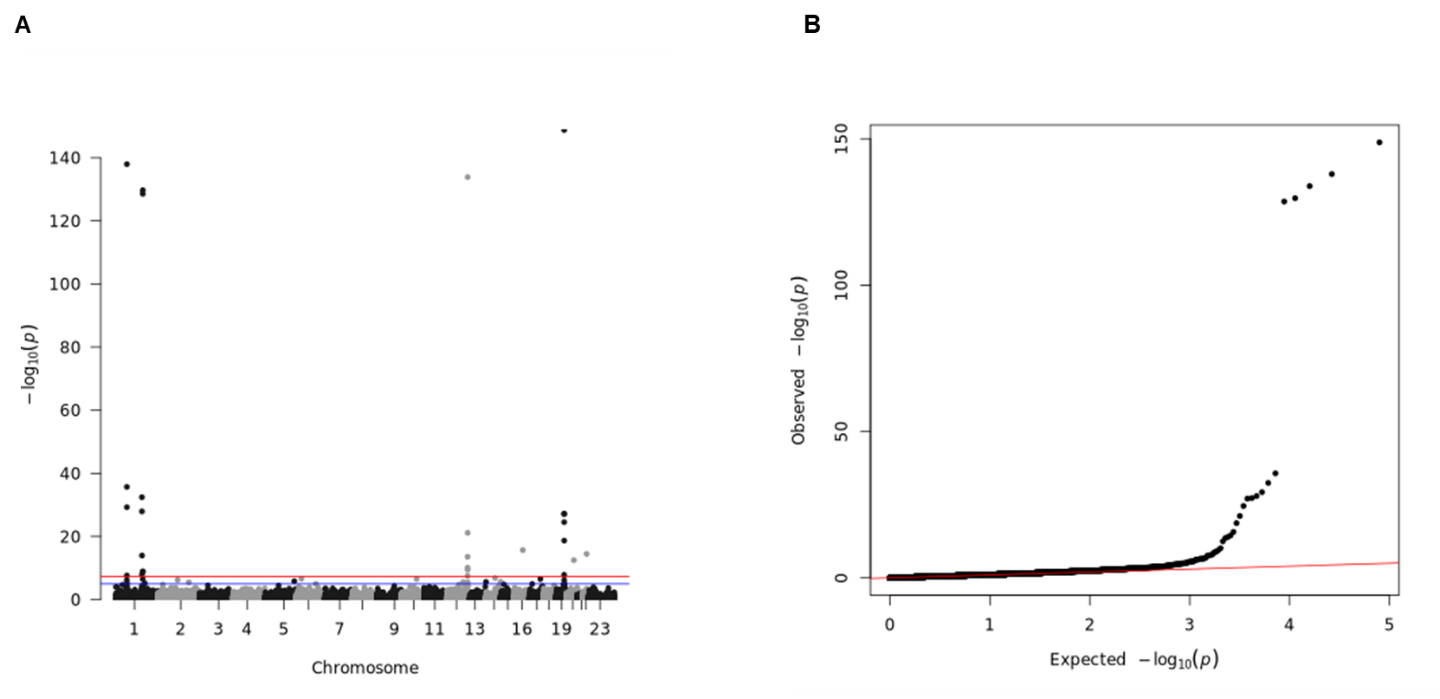


**Fig S12.** **Manhattan plot and Q-Q plot for the single-variant association test for CRP in the WES base reference dataset (UKB**). (**A)** Manhattan plot. Blue line represents significance threshold at P-value < 0.05. Red line represents genome-wide significance threshold at P-value < 5E-08. (**B)** Q-Q plot.


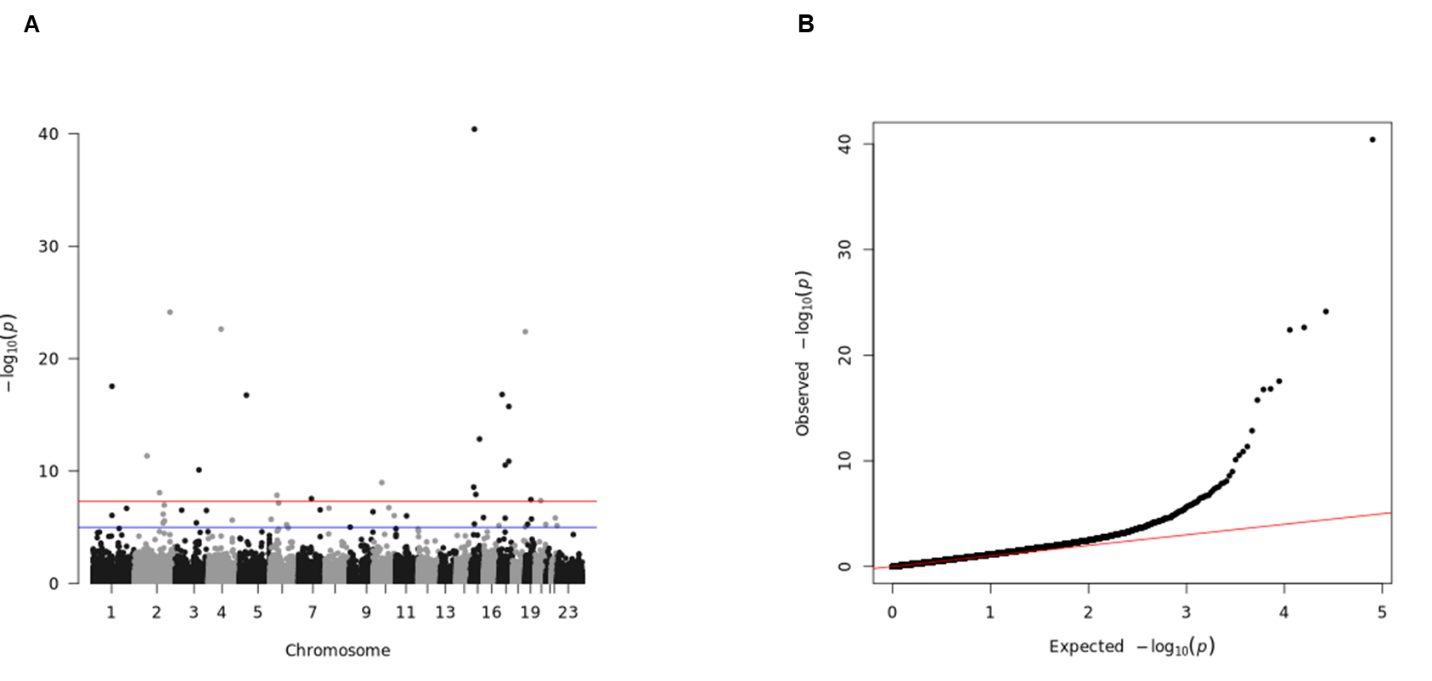


**Fig S13.** **Manhattan plot and Q-Q plot for the single-variant association test for CREA in the WES base reference dataset (UKB**). (**A)** Manhattan plot. Blue line represents significance threshold at P-value < 0.05. Red line represents genome-wide significance threshold at P-value < 5E-08. (**B)** Q-Q plot.


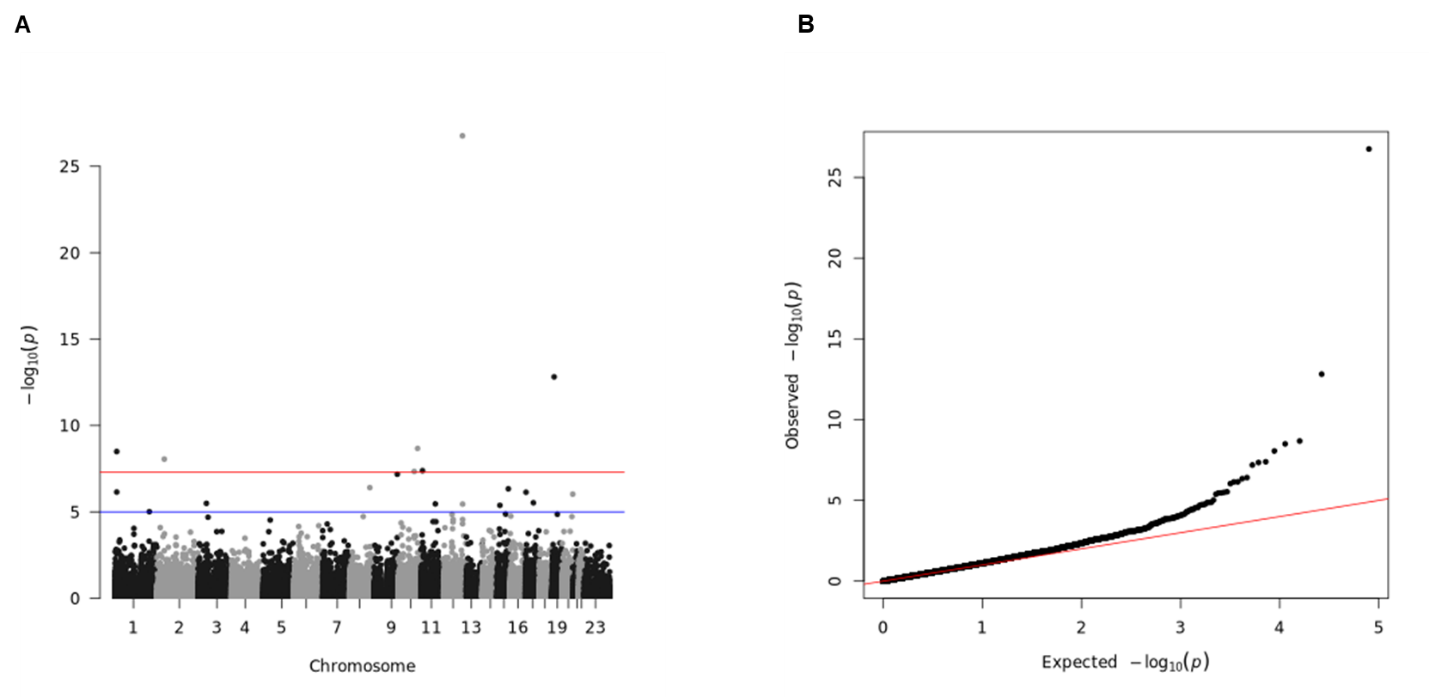


**Fig S14.** **Manhattan plot and Q-Q plot for the single-variant association test for DBP in the WES base reference dataset (UKB**). (**A)** Manhattan plot. Blue line represents significance threshold at P-value < 0.05. Red line represents genome-wide significance threshold at P-value < 5E-08. (**B)** Q-Q plot.


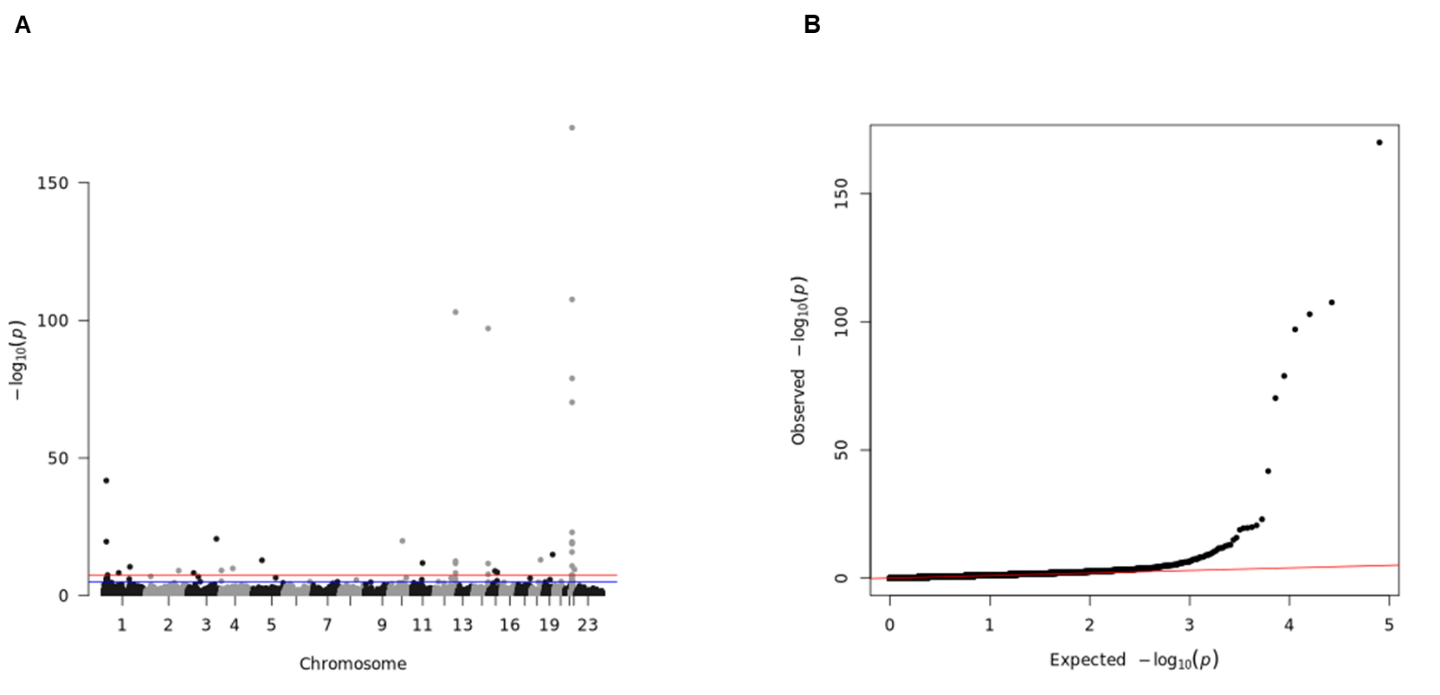


**Fig S15.** **Manhattan plot and Q-Q plot for the single-variant association test for GGT in the WES base reference dataset (UKB**). (**A)** Manhattan plot. Blue line represents significance threshold at P-value < 0.05. Red line represents genome-wide significance threshold at P-value < 5E-08.(**B)** Q-Q plot.


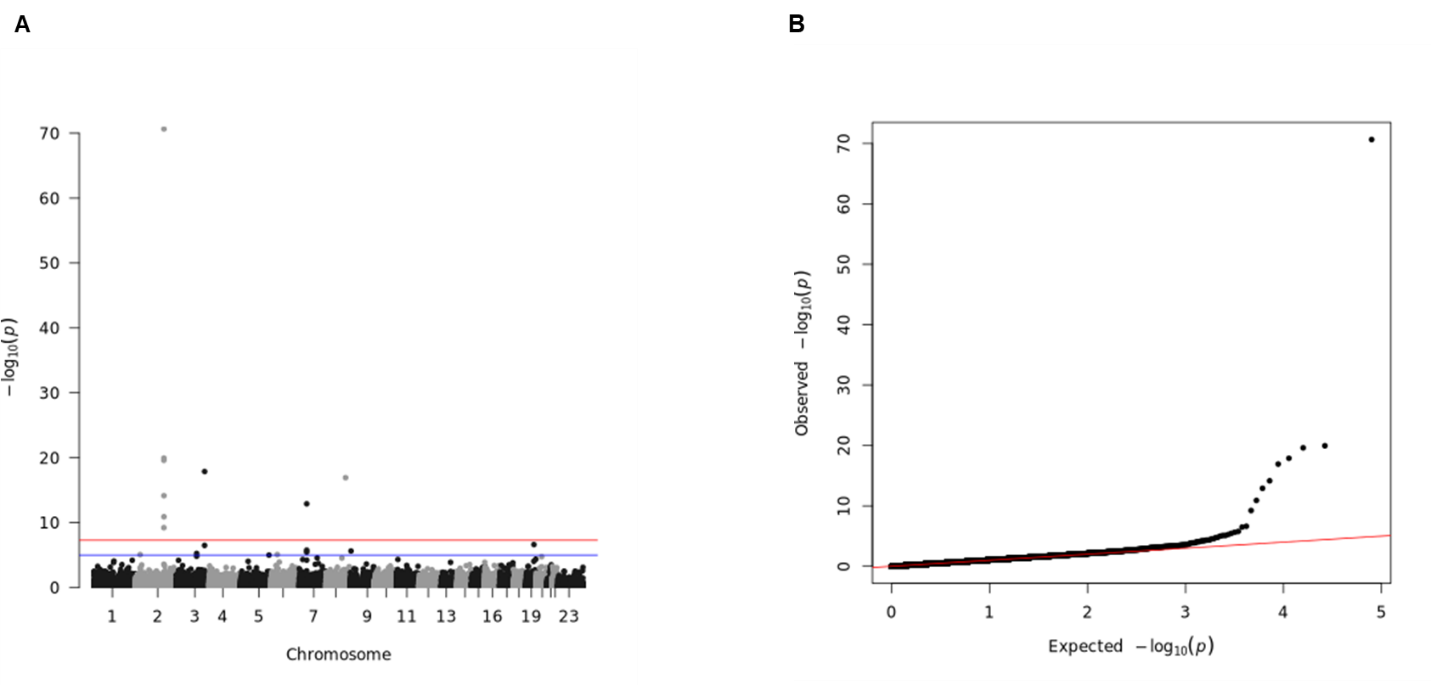


**Fig S16.** **Manhattan plot and Q-Q plot for the single-variant association test for GLUC in the WES base reference dataset (UKB**). (**A)** Manhattan plot. Blue line represents significance threshold at P-value < 0.05. Red line represents genome-wide significance threshold at P-value < 5E-08. (**B)** Q-Q plot.


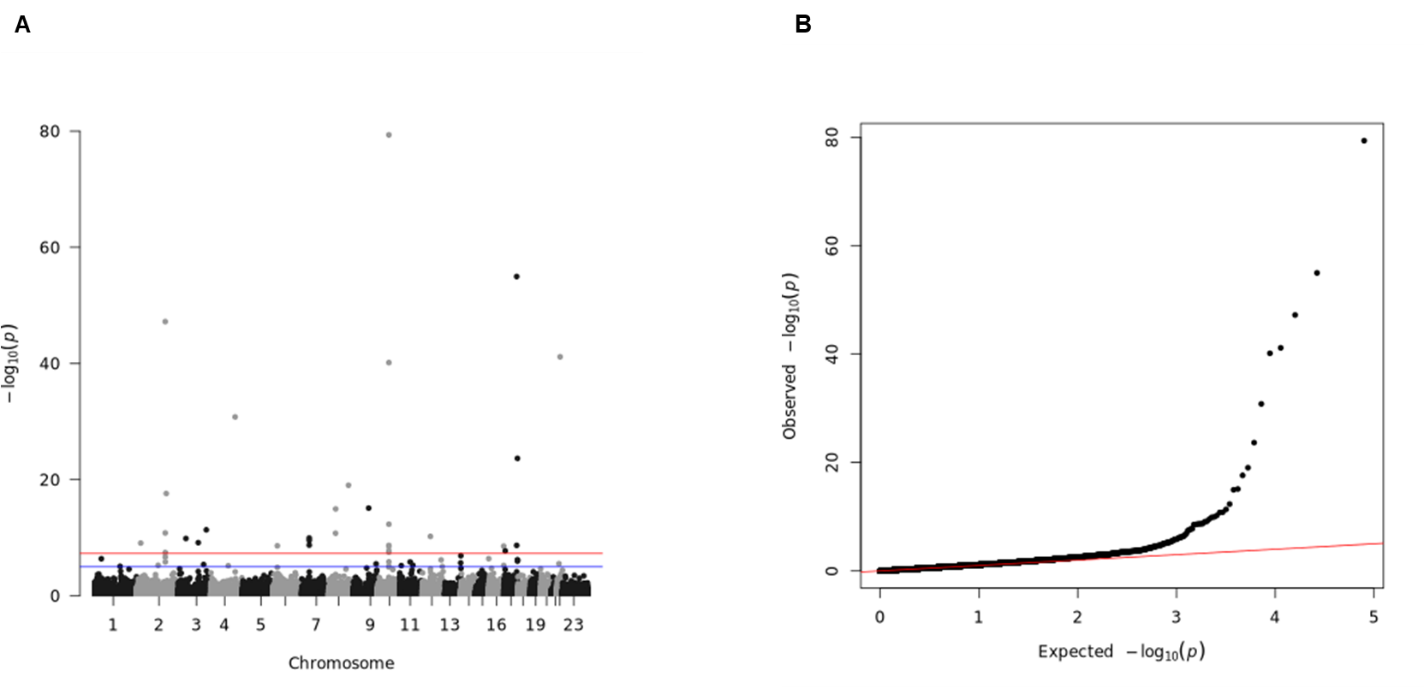


**Fig S17.** **Manhattan plot and Q-Q plot for the single-variant association test for HBA1C in the WES base reference dataset (UKB**). (**A)** Manhattan plot. Blue line represents significance threshold at P-value < 0.05. Red line represents genome-wide significance threshold at P-value < 5E-08. (**B)** Q-Q plot.


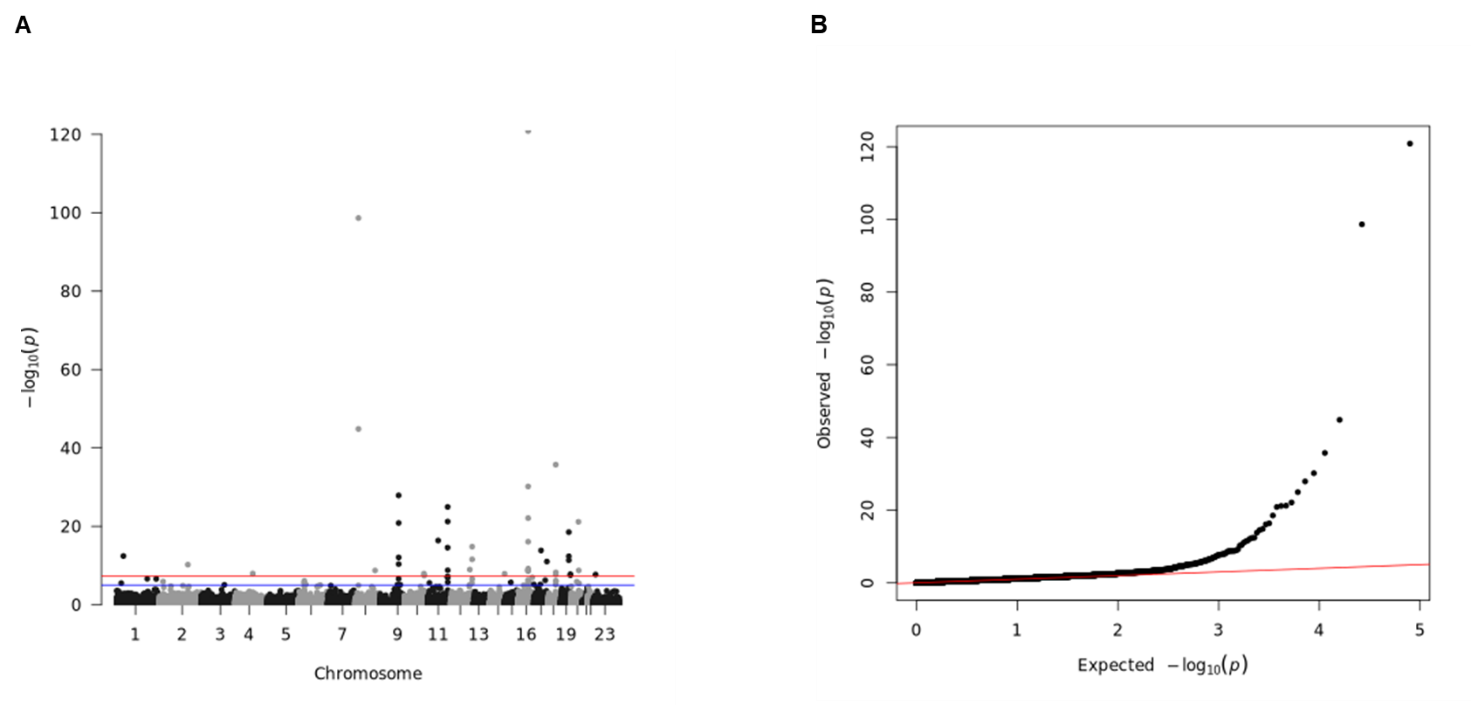


**Fig S18.** **Manhattan plot and Q-Q plot for the single-variant association test for HDL in the WES base reference dataset (UKB**). (**A)** Manhattan plot. Blue line represents significance threshold at P-value < 0.05. Red line represents genome-wide significance threshold at P-value < 5E-08. (**B)** Q-Q plot.


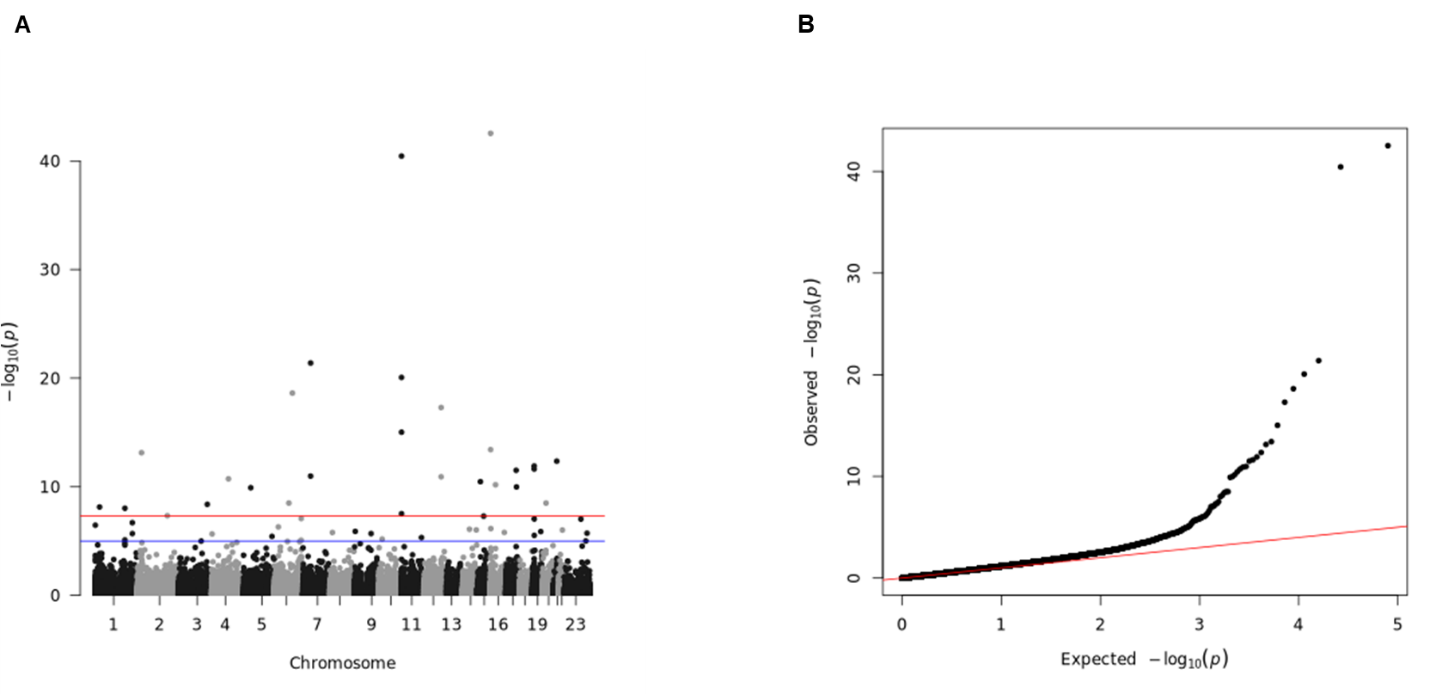


**Fig S19.** **Manhattan plot and Q-Q plot for the single-variant association test for IGF1 in the WES base reference dataset (UKB**). (**A)** Manhattan plot. Blue line represents significance threshold at P-value < 0.05. Red line represents genome-wide significance threshold at P-value < 5E-08. (**B)** Q-Q plot.


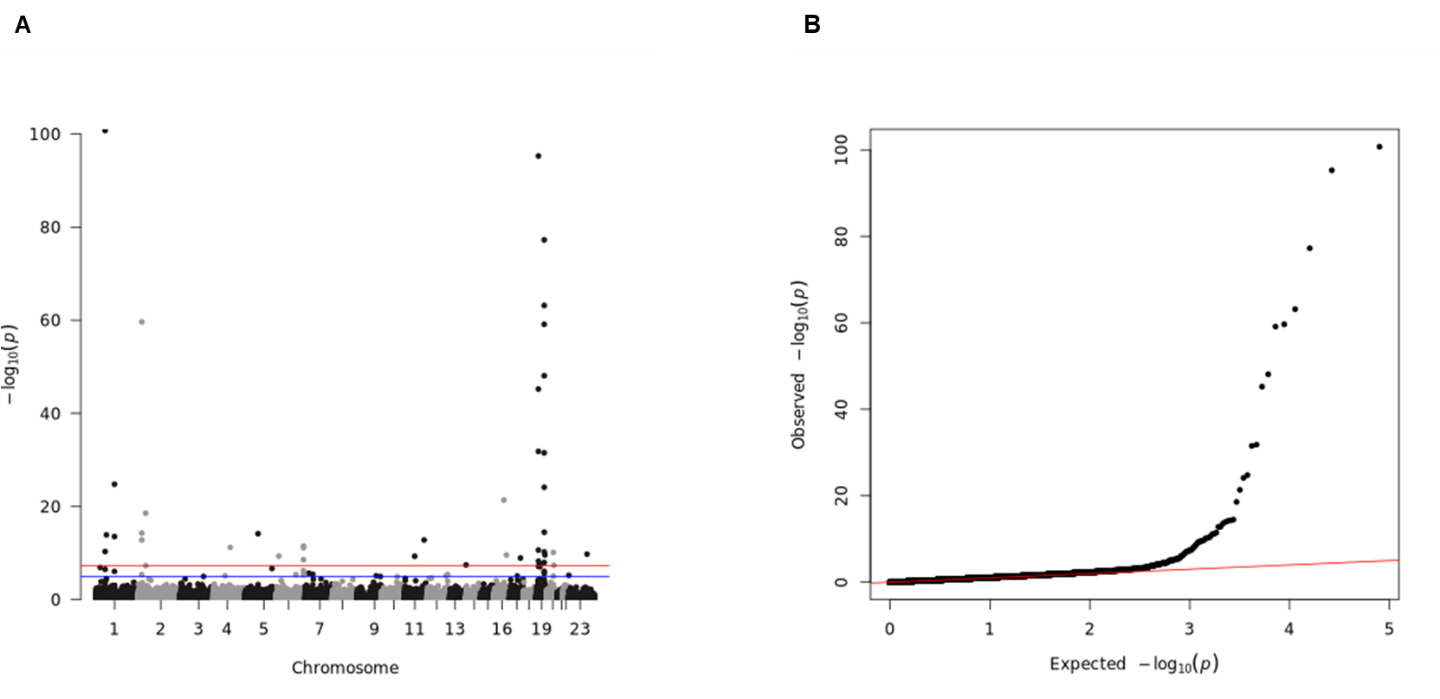


**Fig S20.** **Manhattan plot and Q-Q plot for the single-variant association test for LDL in the WES reference dataset (UKB**). (**A)** Manhattan plot. Blue line represents significance threshold at P-value < 0.05. Red line represents genome-wide significance threshold at P-value < 5E-08. (**B)** Q-Q plot.


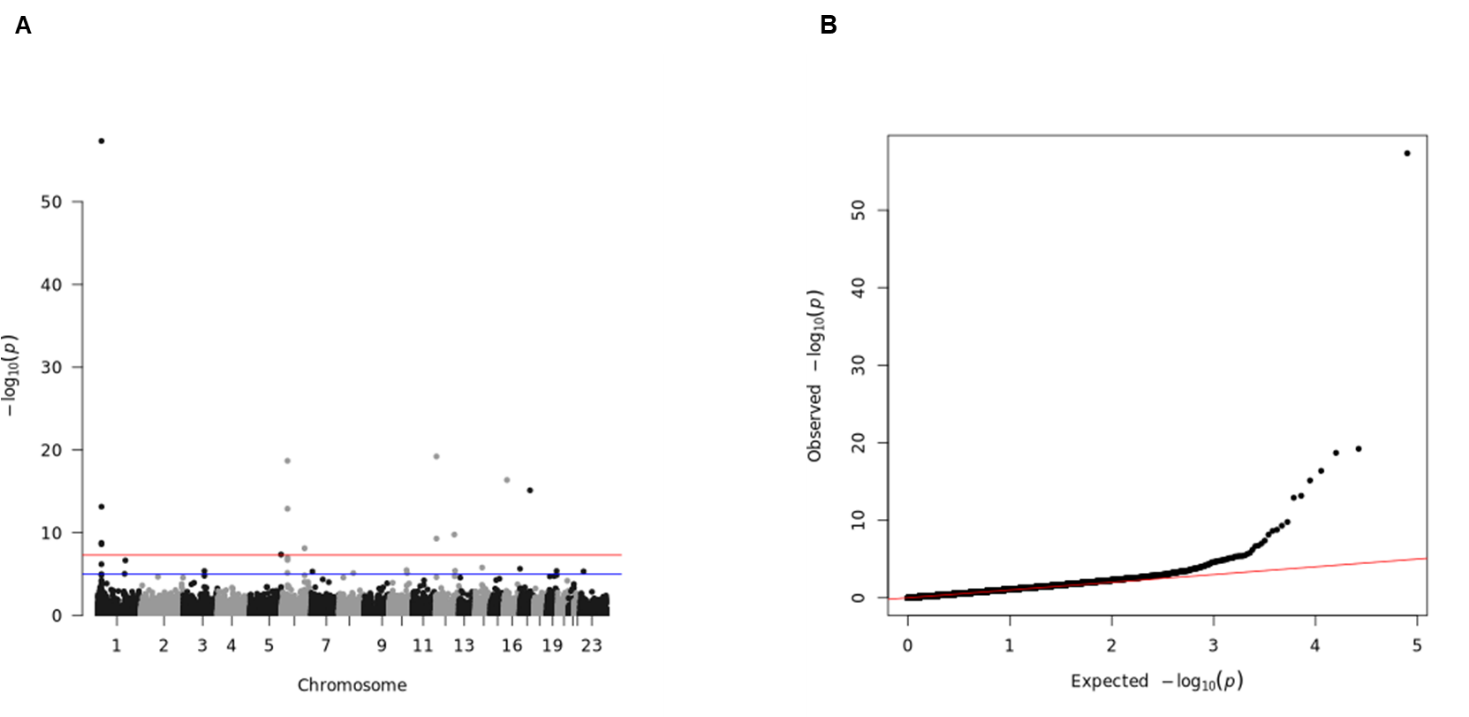


**Fig S21.** **Manhattan plot and Q-Q plot for the single-variant association test for PHOS in the WES base reference dataset (UKB**). (**A)** Manhattan plot. Blue line represents significance threshold at P-value < 0.05. Red line represents genome-wide significance threshold at P-value < 5E-08. (**B)** Q-Q plot.


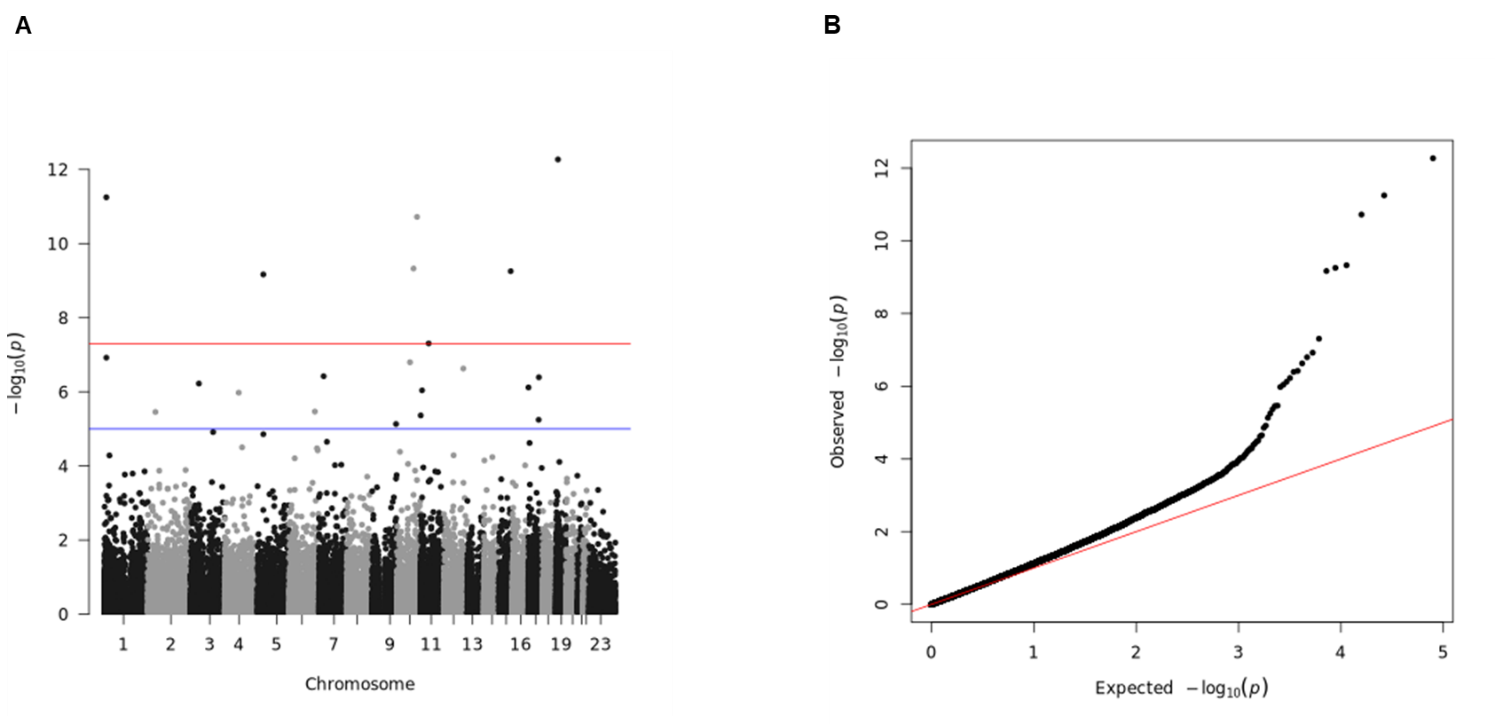


**Fig S22.** **Manhattan plot and Q-Q plot for the single-variant association test for SBP in the WES base reference dataset (UKB**). (**A)** Manhattan plot. Blue line represents significance threshold at P-value < 0.05. Red line represents genome-wide significance threshold at P-value < 5E-08. (**B)** Q-Q plot. Figure related to Figure 5.


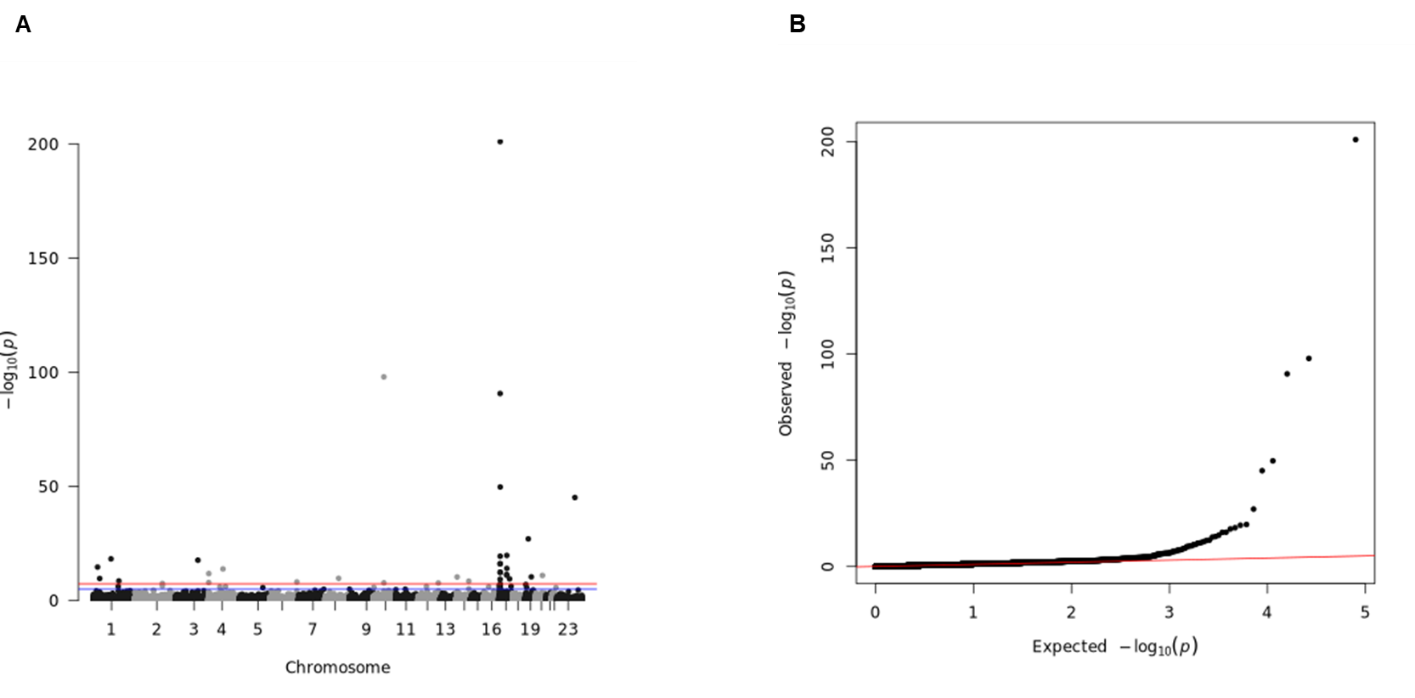


**Fig S23.** **Manhattan plot and Q-Q plot for the single-variant association test for SHBG in the WES base reference dataset (UKB**). (**A)** Manhattan plot. Blue line represents significance threshold at P-value < 0.05. Red line represents genome-wide significance threshold at P-value < 5E-08. (**B)** Q-Q plot.


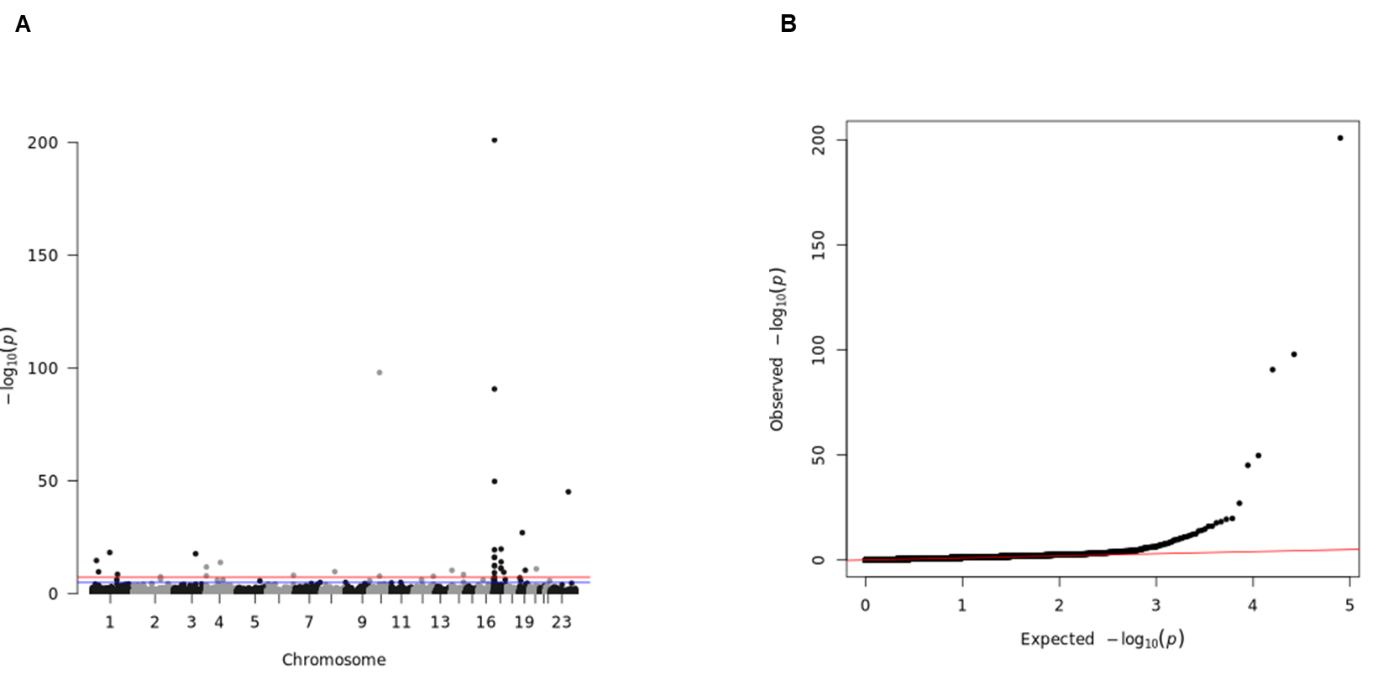


**Fig S24.** **Manhattan plot and Q-Q plot for the single-variant association test for TBIL in the WES base reference dataset (UKB**). (**A)** Manhattan plot. Blue line represents significance threshold at P-value < 0.05. Red line represents genome-wide significance threshold at P-value < 5E-08. (**B)** Q-Q plot.


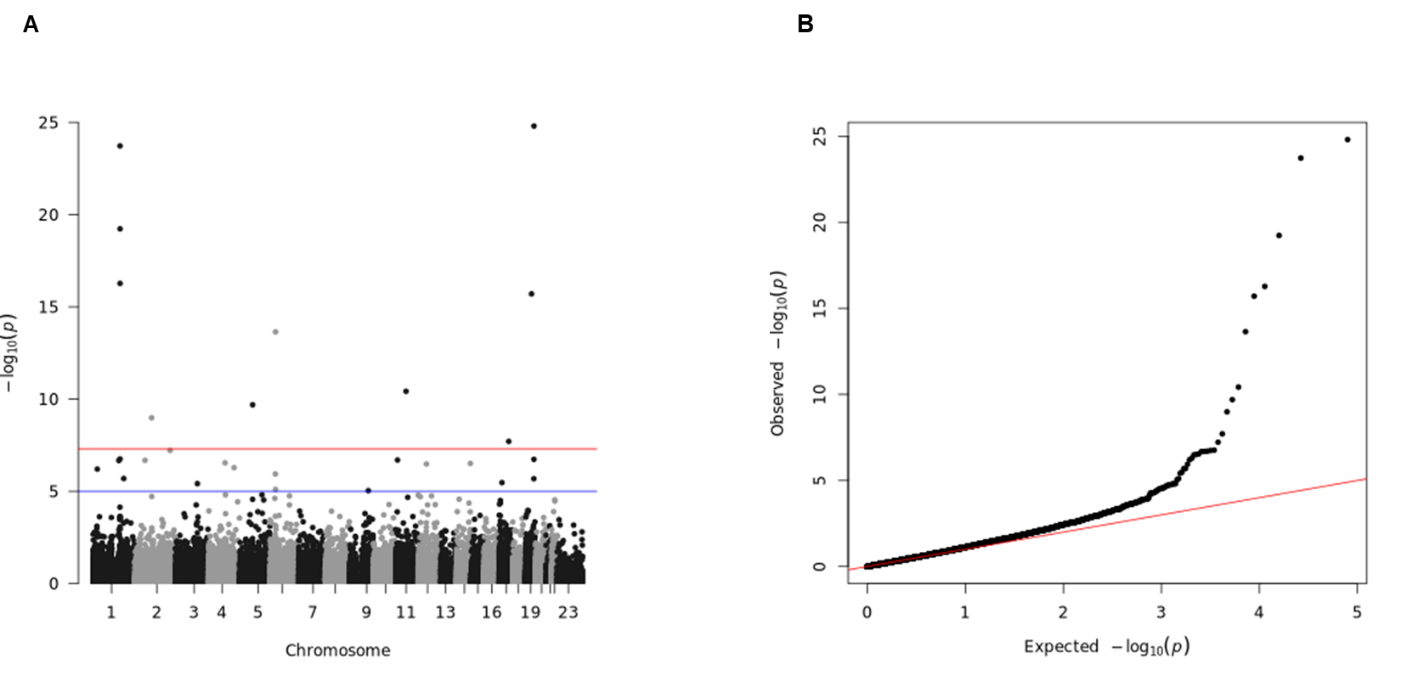


**Fig S25.** **Manhattan plot and Q-Q plot for the single-variant association test for TPROT in the WES base reference dataset (UKB**). (**A)** Manhattan plot. Blue line represents significance threshold at P-value < 0.05. Red line represents genome-wide significance threshold at P-value < 5E-08. (**B)** Q-Q plot.


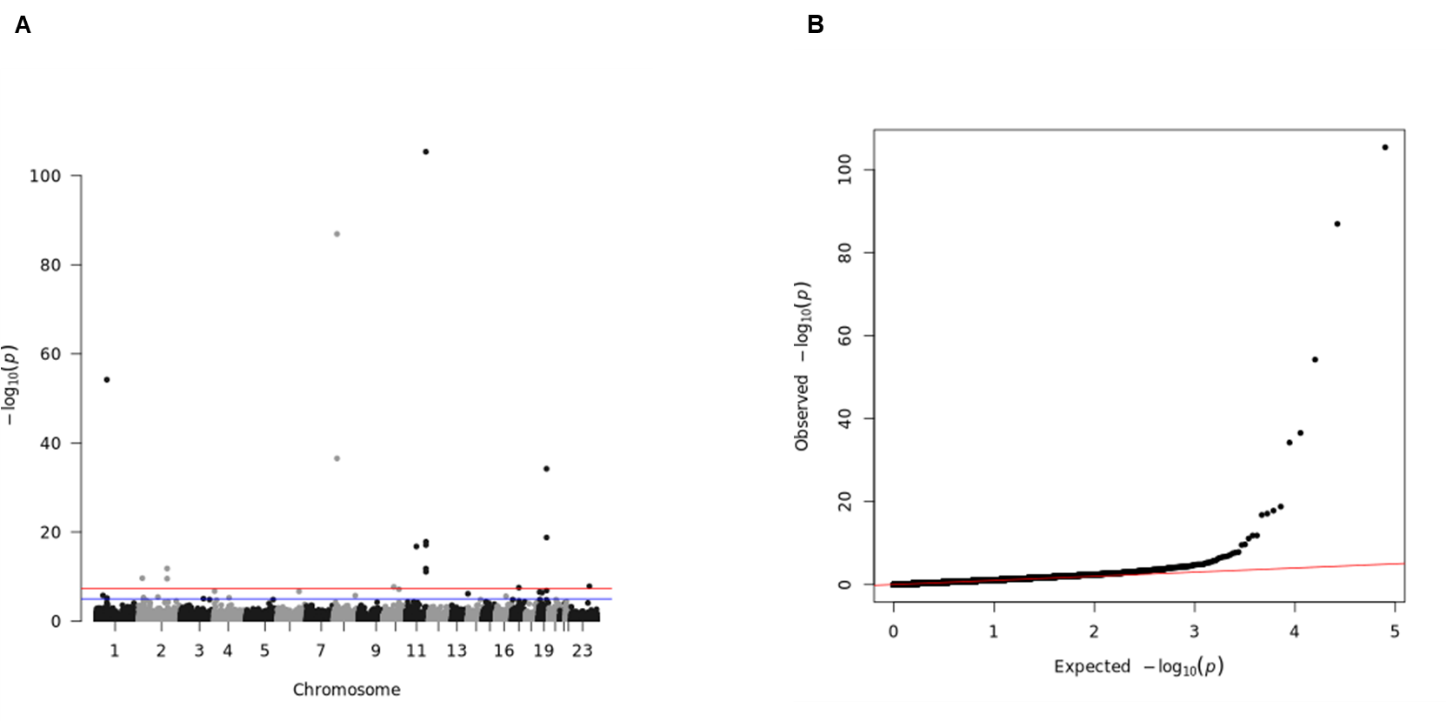


**Fig S26.** **Manhattan plot and Q-Q plot for the single-variant association test for TRIG in the WES base reference dataset (UKB**). (**A)** Manhattan plot. Blue line represents significance threshold at P-value < 0.05. Red line represents genome-wide significance threshold at P-value < 5E-08. (**B)** Q-Q plot.


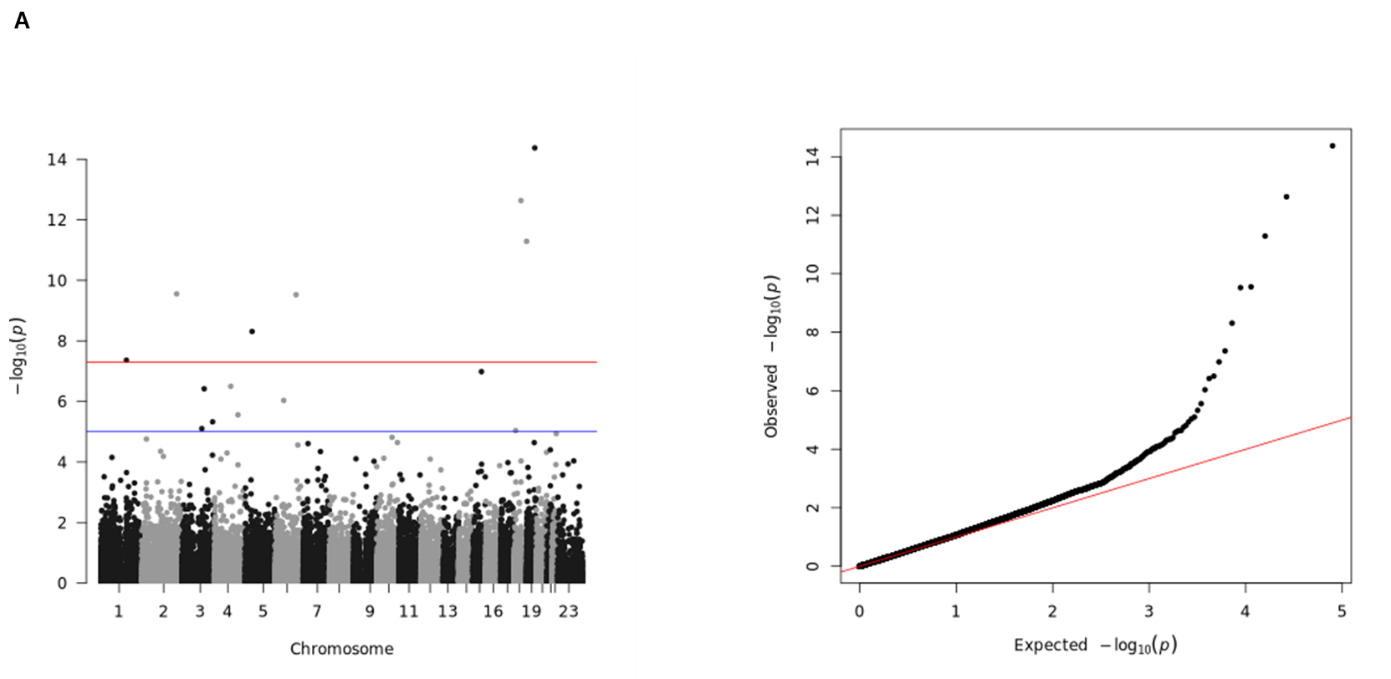


**Fig S27.** **Manhattan plot and Q-Q plot for the single-variant association test for URA in the WES base reference dataset (UKB**). (**A)** Manhattan plot. Blue line represents significance threshold at P-value < 0.05. Red line represents genome-wide significance threshold at P-value < 5E-08. (**B)** Q-Q plot.


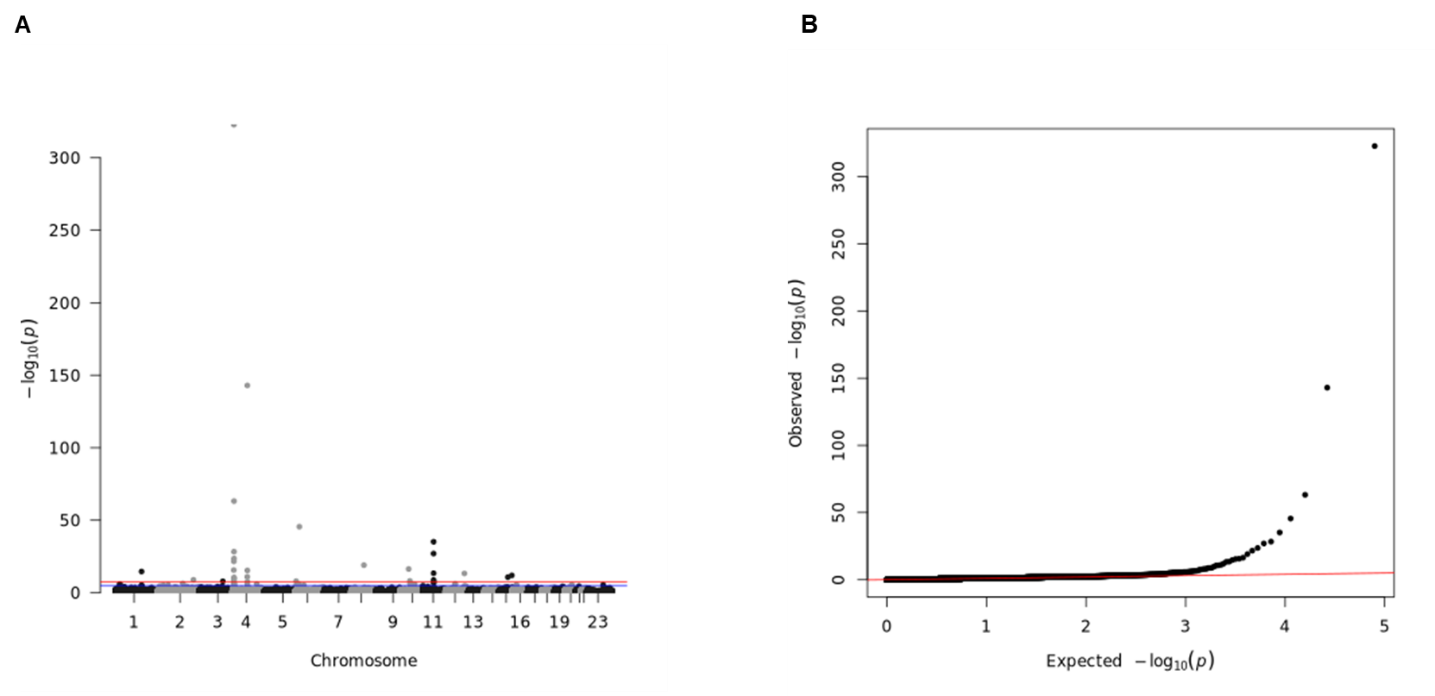


**Fig S28.** **Manhattan plot and Q-Q plot for the single-variant association test for URT in the WES array base reference dataset (UKB**). (**A)** Manhattan plot. Blue line represents significance threshold at P-value < 0.05. Red line represents genome-wide significance threshold at P-value < 5E-08. (**B)** Q-Q plot.


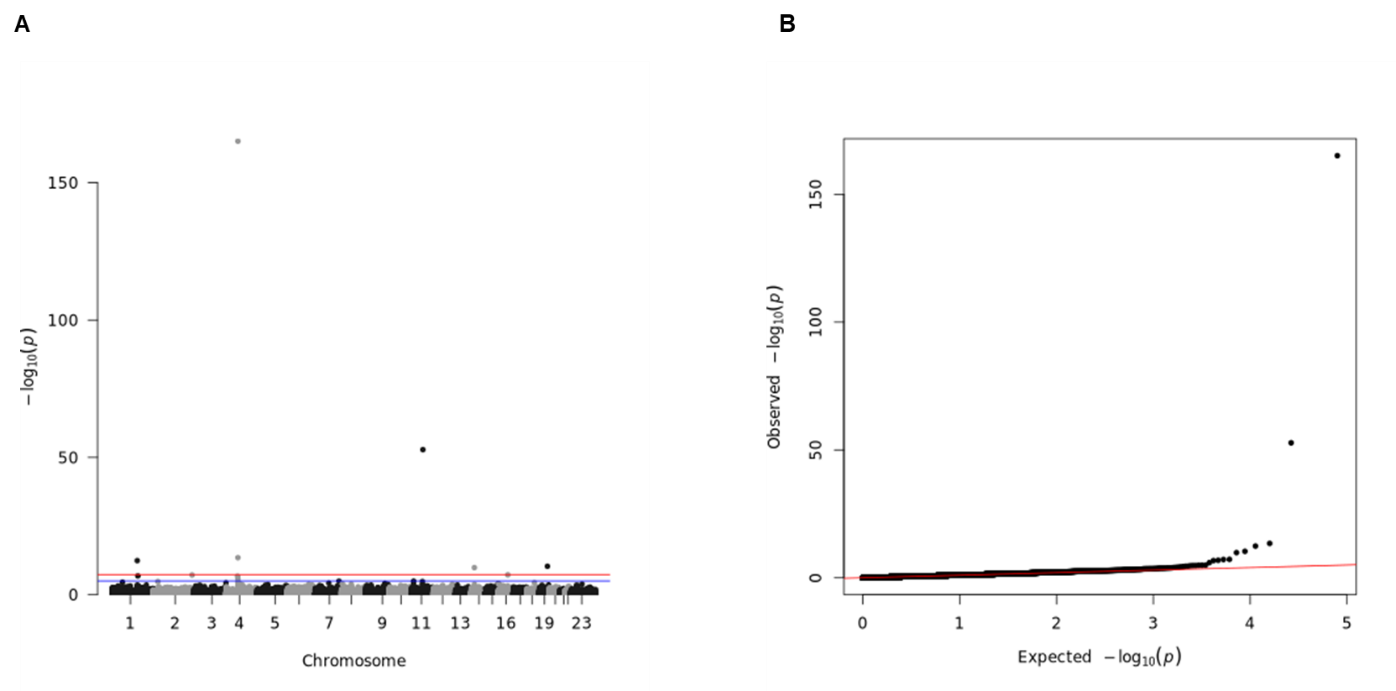


**Fig S29.** **Manhattan plot and Q-Q plot for the single-variant association test for VITD in the WES base reference dataset (UKB**). (**A)** Manhattan plot. Blue line represents significance threshold at P-value < 0.05. Red line represents genome-wide significance threshold at P-value < 5E-08. (**B)** Q-Q plot.


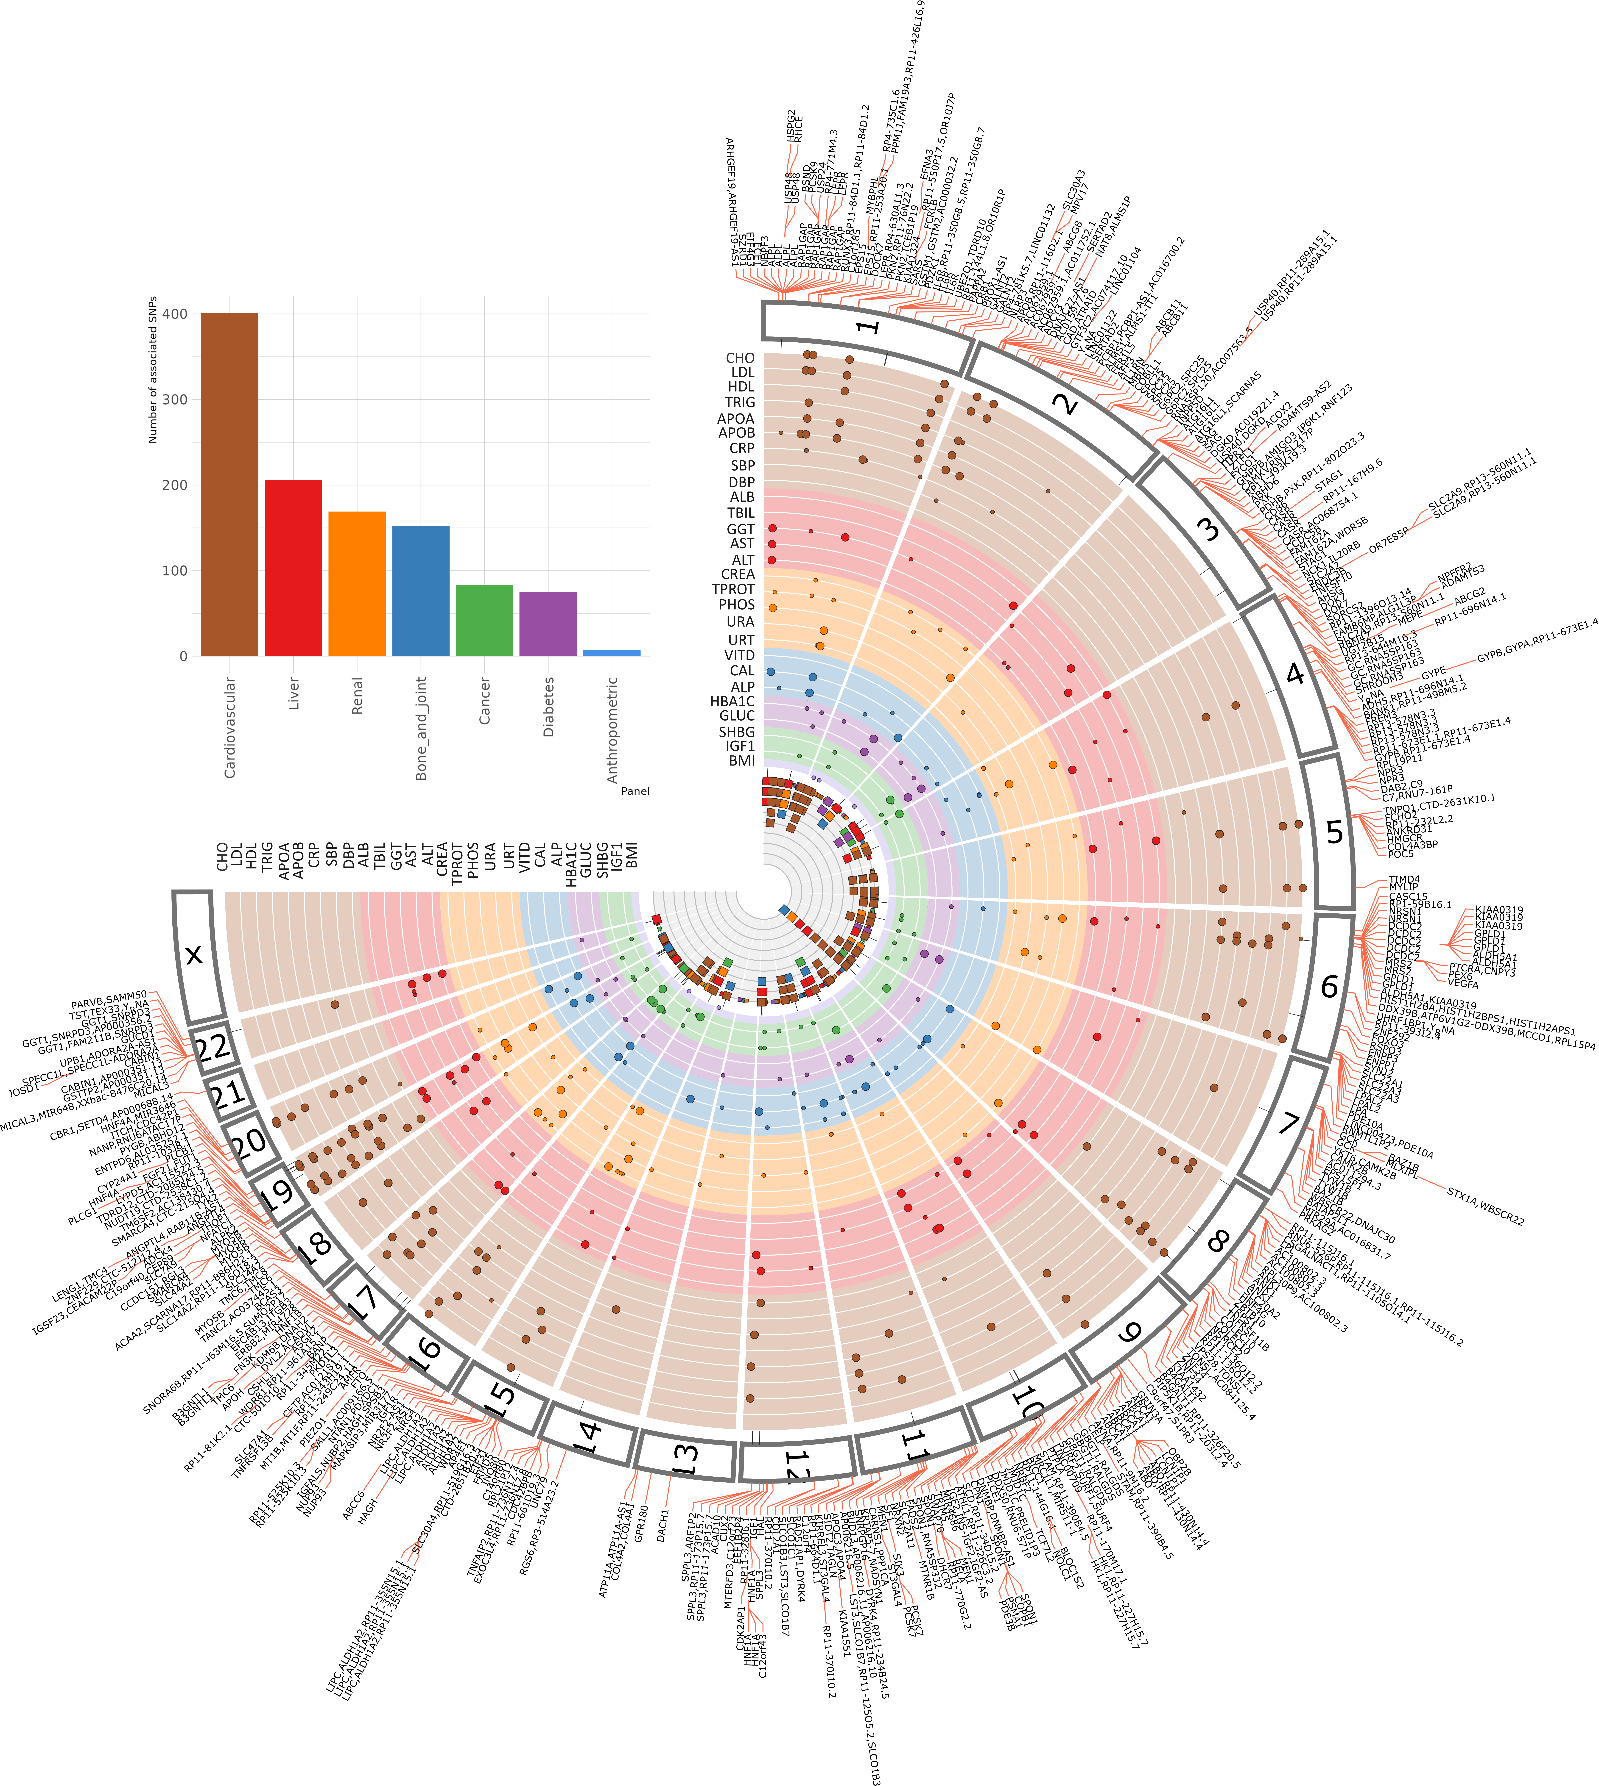


**Fig S30.** **Circular representation of significant associations mapped to genes obtained from the array-based dataset (UKB**). Each dot corresponds to an associated SNPs (maped locus or gene). Larger dots highlights pleiotropic associations or same associated SNP across traits. Top left includes a bar plot of the number of associations per biomarker panel. Figure related to Figure 3.

#
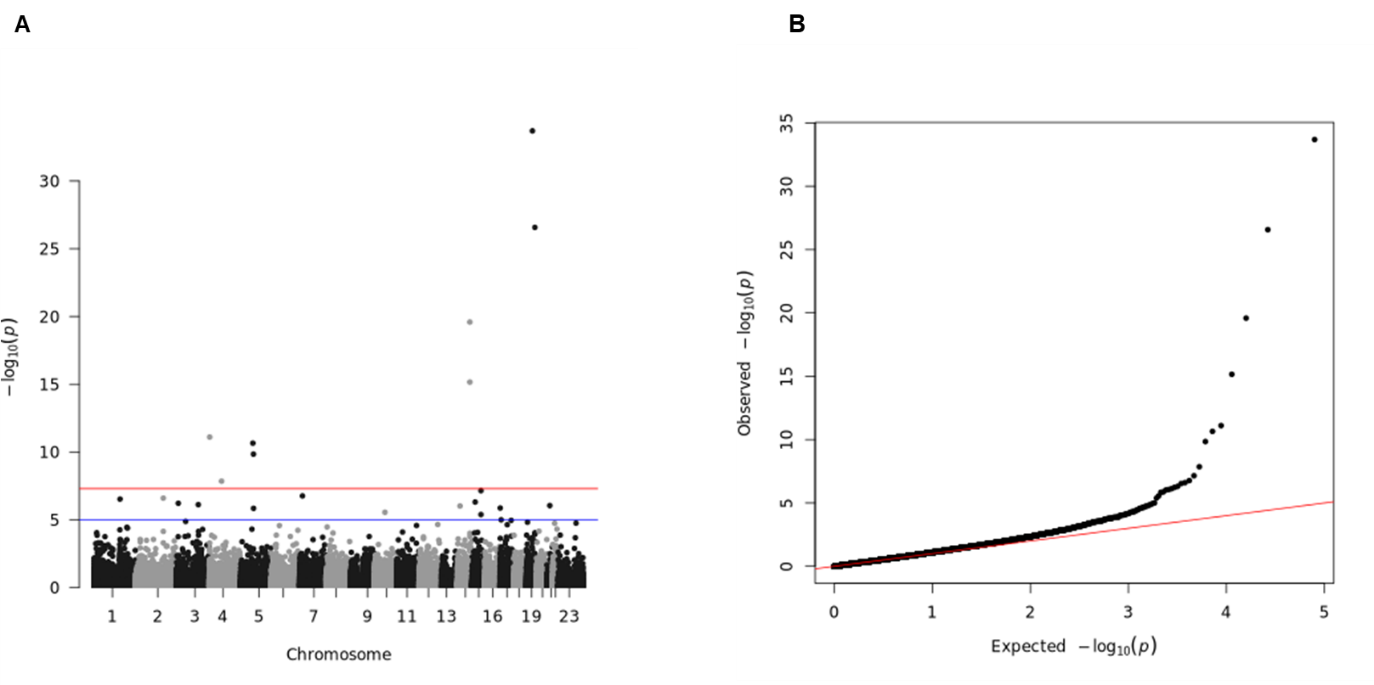


**Fig S31.** **Manhattan plot and Q-Q plot for the single-variant association test for ALB in the imputed genotype array base reference dataset (UKB**). (**A)** Manhattan plot. Blue line represents significance threshold at P-value < 0.05. Red line represents genome-wide significance threshold at P-value < 5E-08. (**B)** Q-Q plot. Figure related to Figure 5.


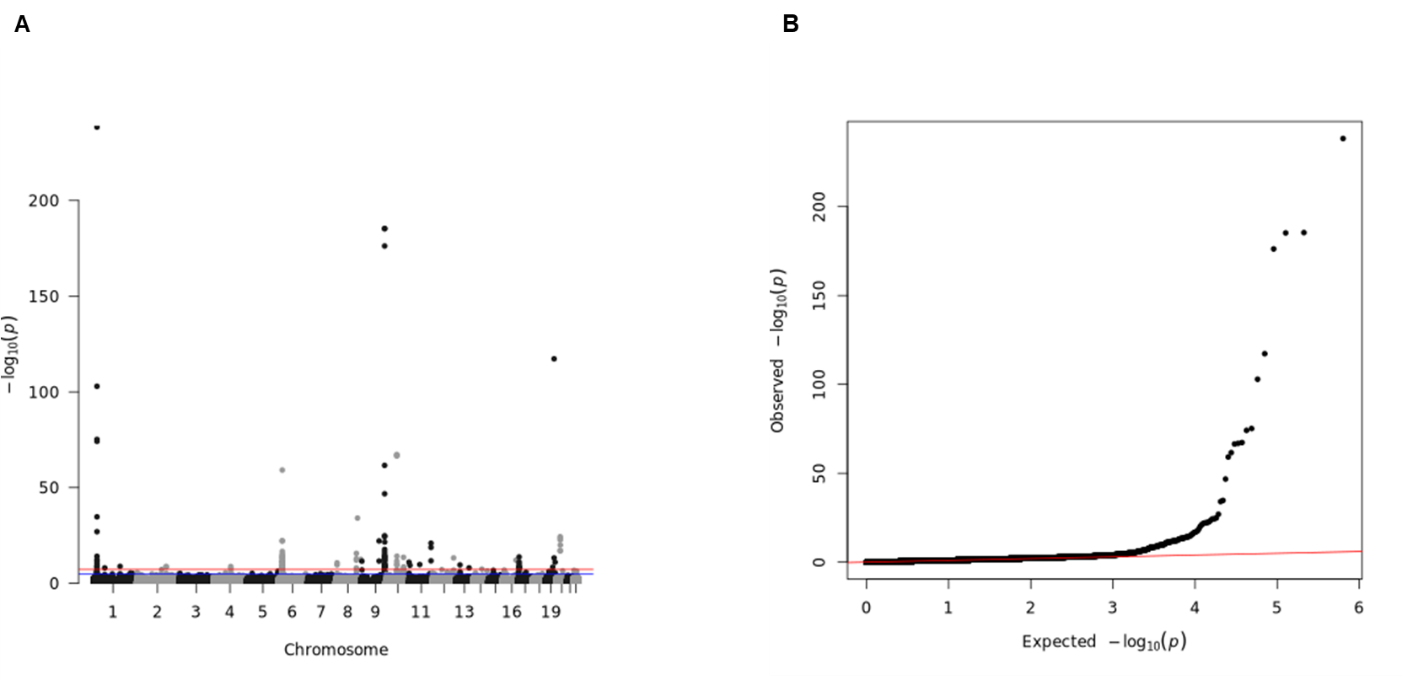


**Fig S32.** **Manhattan plot and Q-Q plot for the single-variant association test for ALP in the imputed genotype array base reference dataset (UKB**). (**A)** Manhattan plot. Blue line represents significance threshold at P-value < 0.05. Red line represents genome-wide significance threshold at P-value < 5E-08. (**B)** Q-Q plot.


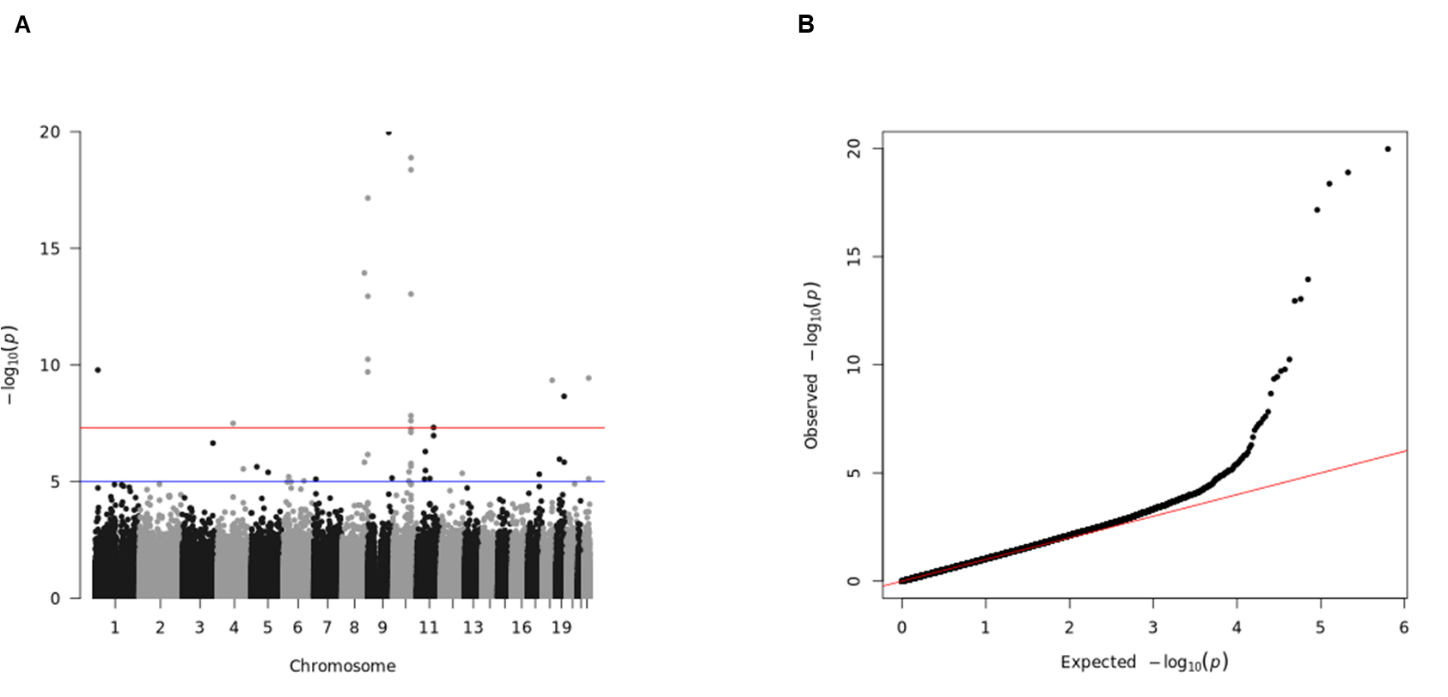


**Fig S33.** **Manhattan plot and Q-Q plot for the single-variant association test for ALT in the imputed genotype array base reference dataset (UKB**). (**A)** Manhattan plot. Blue line represents significance threshold at P-value < 0.05. Red line represents genome-wide significance threshold at P-value < 5E-08. (**B)** Q-Q plot.


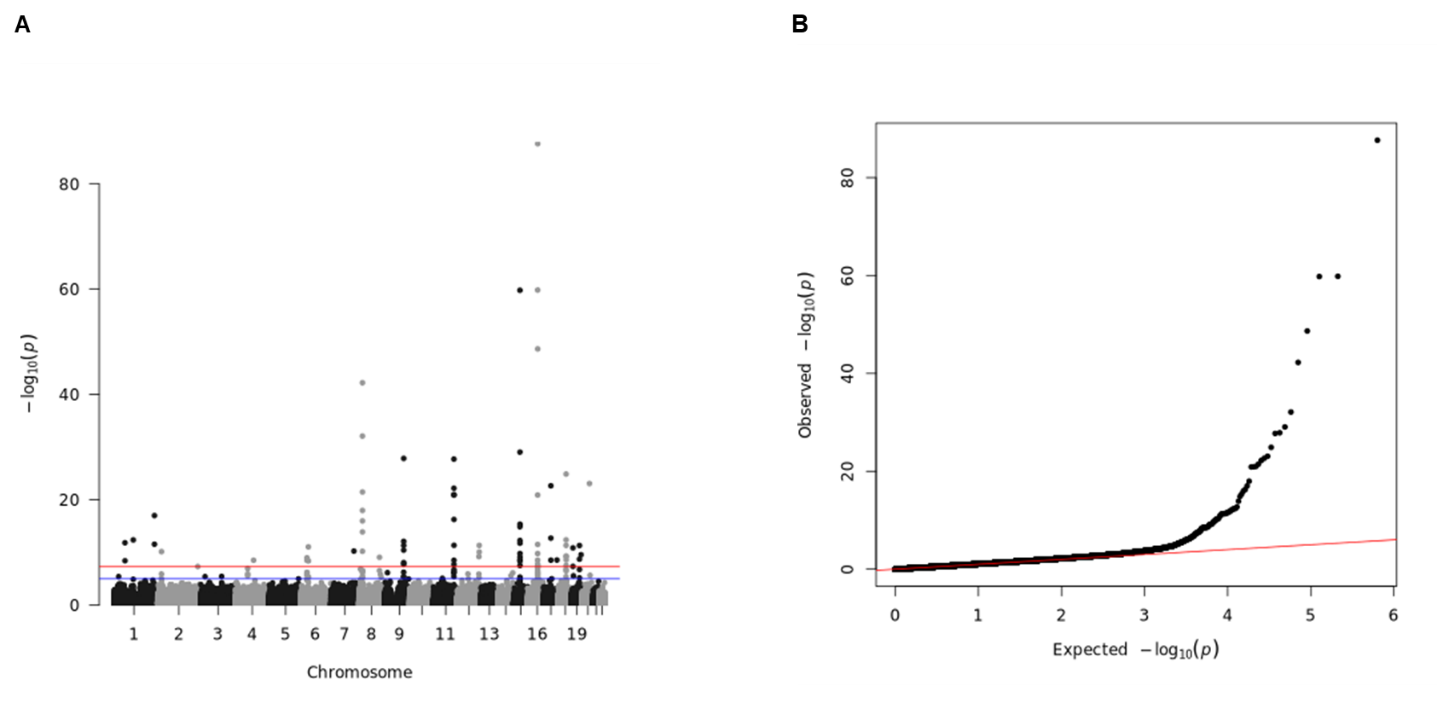


**Fig S34.** **Manhattan plot and Q-Q plot for the single-variant association test for APOA in the imputed genotype array base reference dataset (UKB**). (**A)** Manhattan plot. Blue line represents significance threshold at P-value < 0.05. Red line represents genome-wide significance threshold at P-value < 5E-08. (**B)** Q-Q plot.


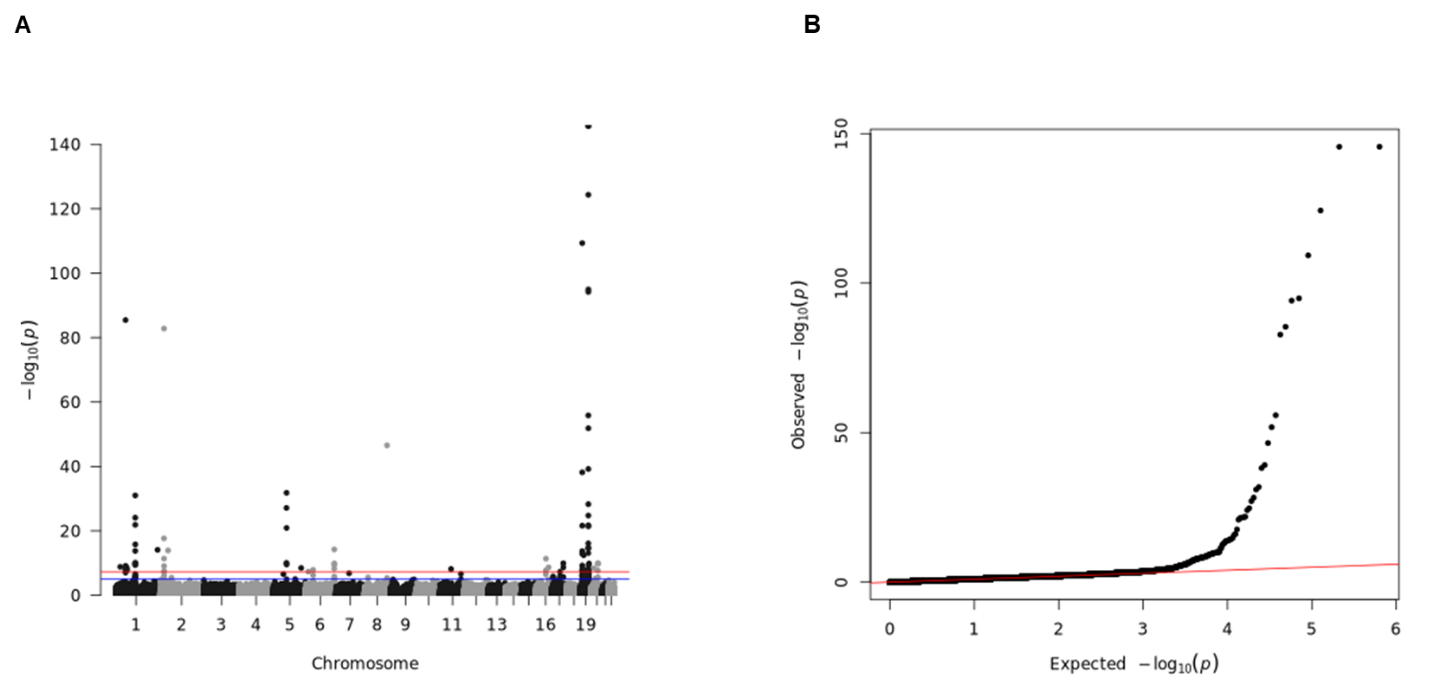


**Fig S35.** **Manhattan plot and Q-Q plot for the single-variant association test for APOB in the imputed genotype array base reference dataset (UKB**). (**A)** Manhattan plot. Blue line represents significance threshold at P-value < 0.05. Red line represents genome-wide significance threshold at P-value < 5E-08. (**B)** Q-Q plot.


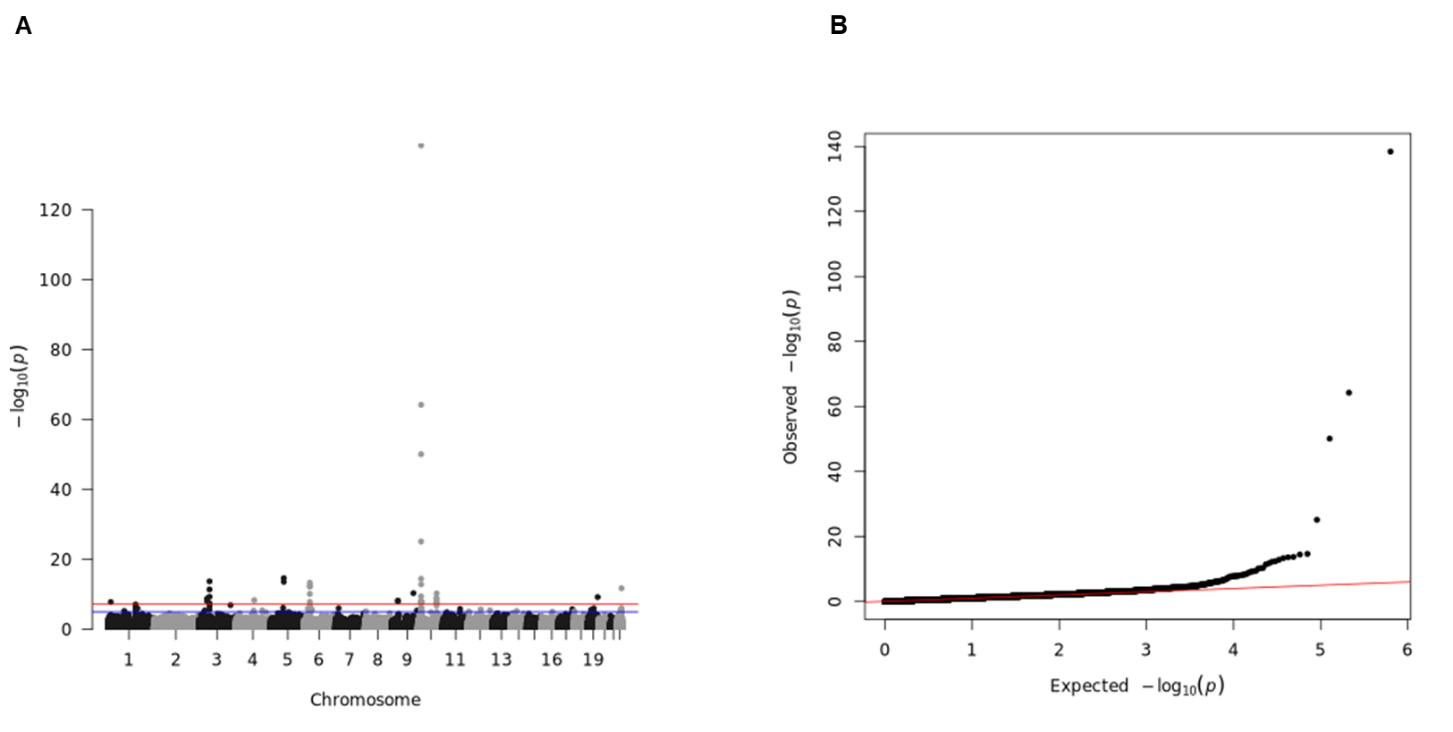


**Fig S36.** **Manhattan plot and Q-Q plot for the single-variant association test for AST in the imputed genotype array base reference dataset (UKB**). (**A)** Manhattan plot. Blue line represents significance threshold at P-value < 0.05. Red line represents genome-wide significance threshold at P-value < 5E-08. (**B)** Q-Q plot.


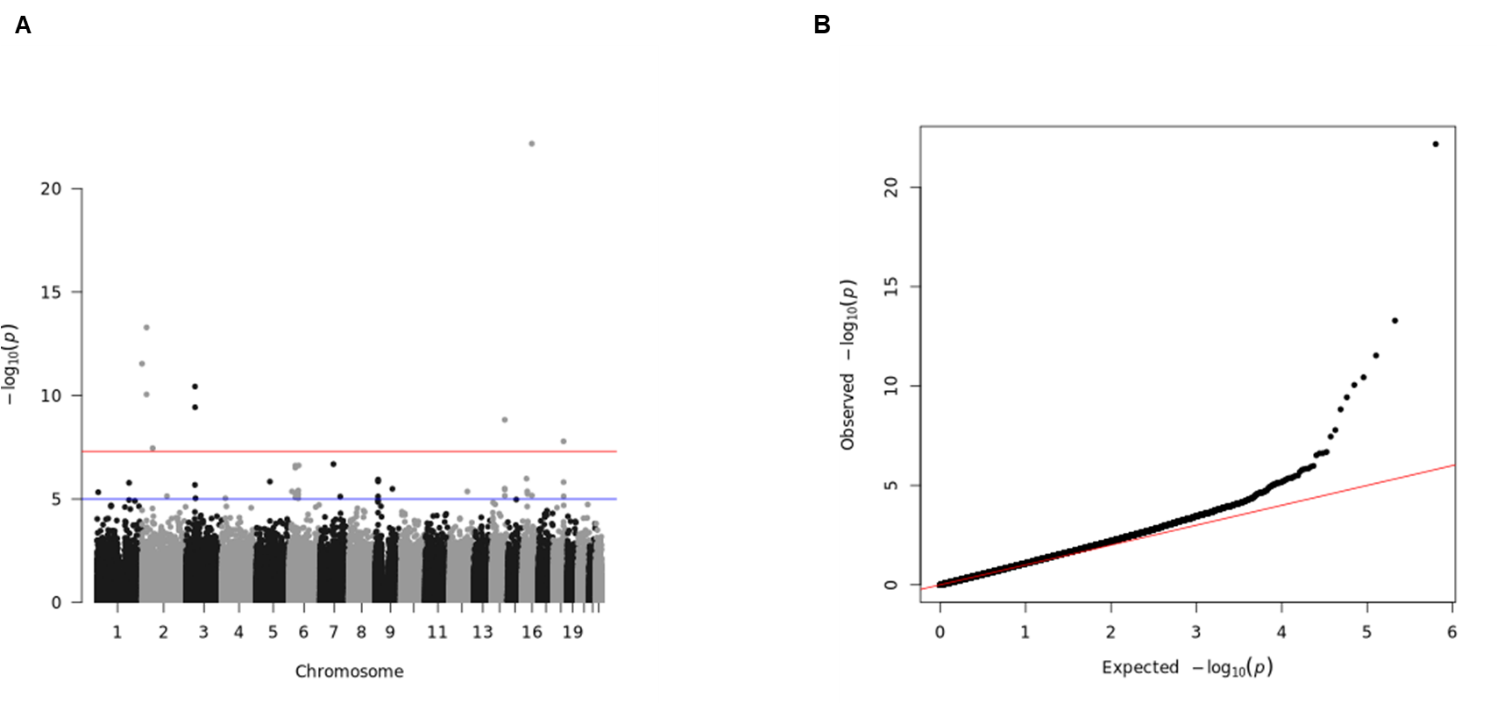


**Fig S37.** **Manhattan plot and Q-Q plot for the single-variant association test for BMI in the imputed genotype array base reference dataset (UKB**). (**A)** Manhattan plot. Blue line represents significance threshold at P-value < 0.05. Red line represents genome-wide significance threshold at P-value < 5E-08. (**B)** Q-Q plot.


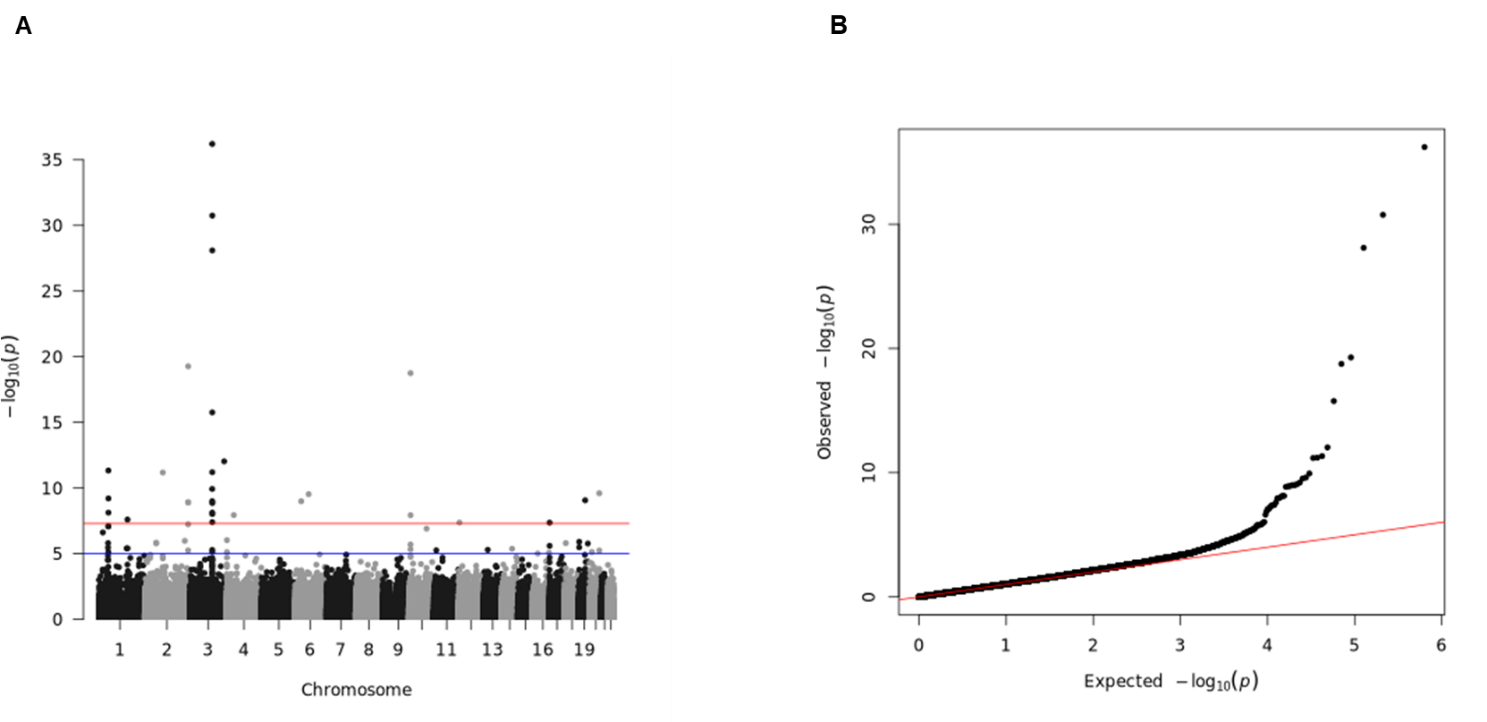


**Fig S38.** **Manhattan plot and Q-Q plot for the single-variant association test for CAL in the imputed genotype array base reference dataset (UKB**). (**A)** Manhattan plot. Blue line represents significance threshold at P-value < 0.05. Red line represents genome-wide significance threshold at P-value < 5E-08. (**B)** Q-Q plot.


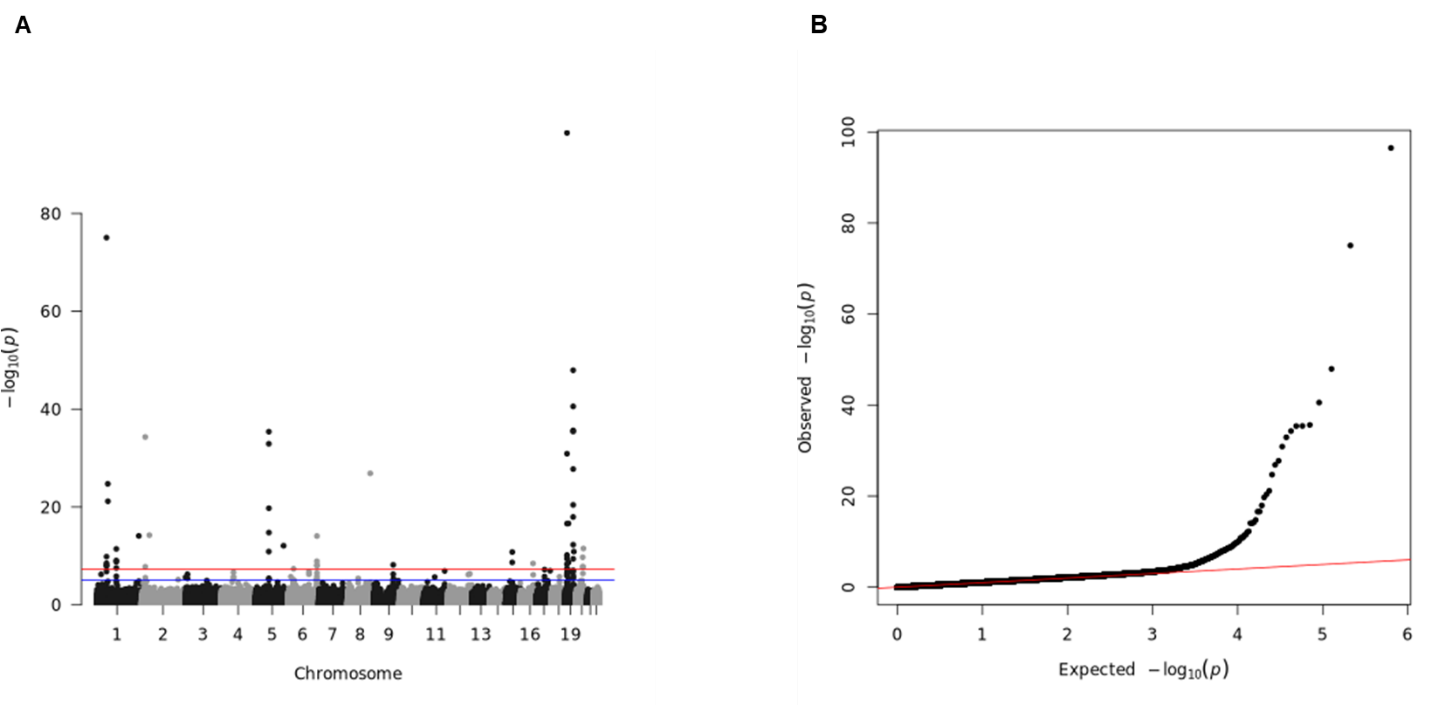


**Fig S39.** **Manhattan plot and Q-Q plot for the single-variant association test for CHO in the imputed genotype array base reference dataset (UKB**). (**A)** Manhattan plot. Blue line represents significance threshold at P-value < 0.05. Red line represents genome-wide significance threshold at P-value < 5E-08. (**B)** Q-Q plot.


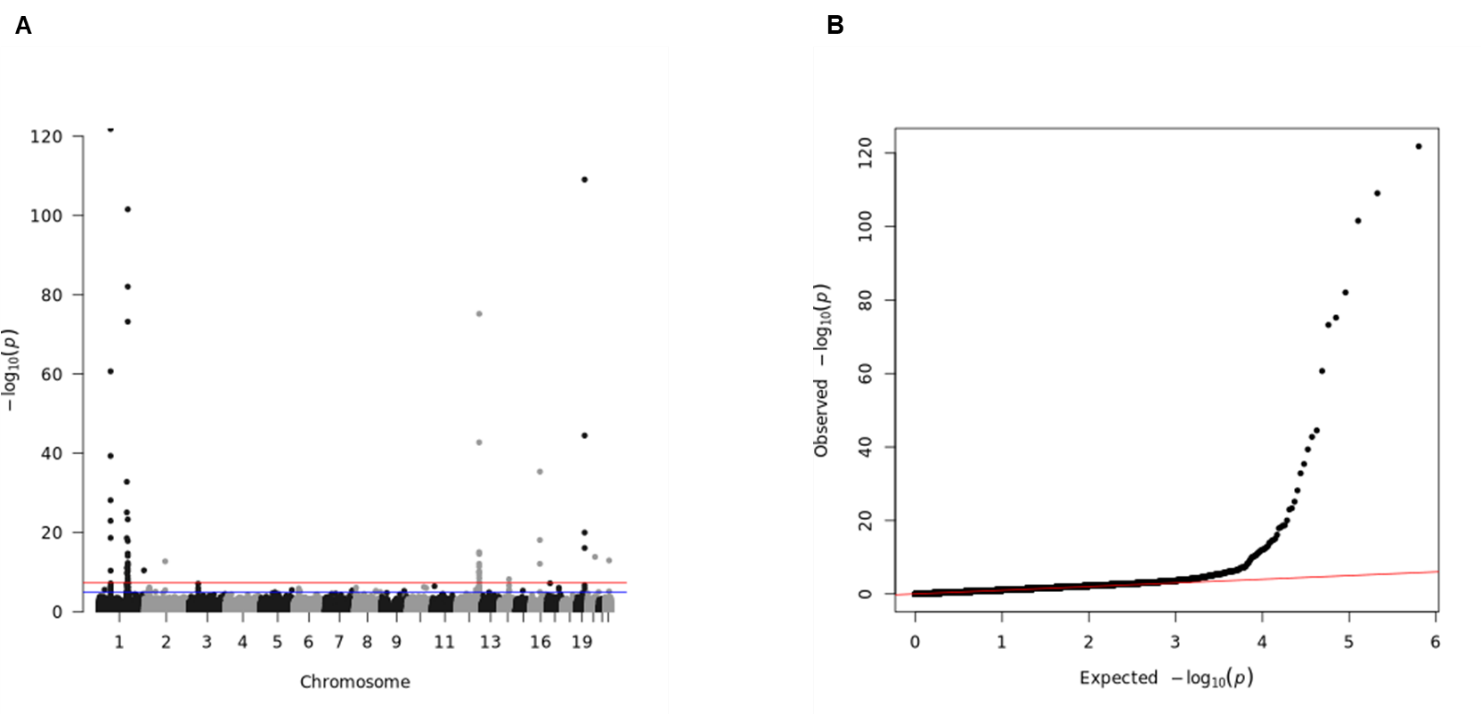


**Fig S40.** **Manhattan plot and Q-Q plot for the single-variant association test for CRP in the imputed genotype array base reference dataset (UKB**). (**A)** Manhattan plot. Blue line represents significance threshold at P-value < 0.05. Red line represents genome-wide significance threshold at P-value < 5E-08. (**B)** Q-Q plot.


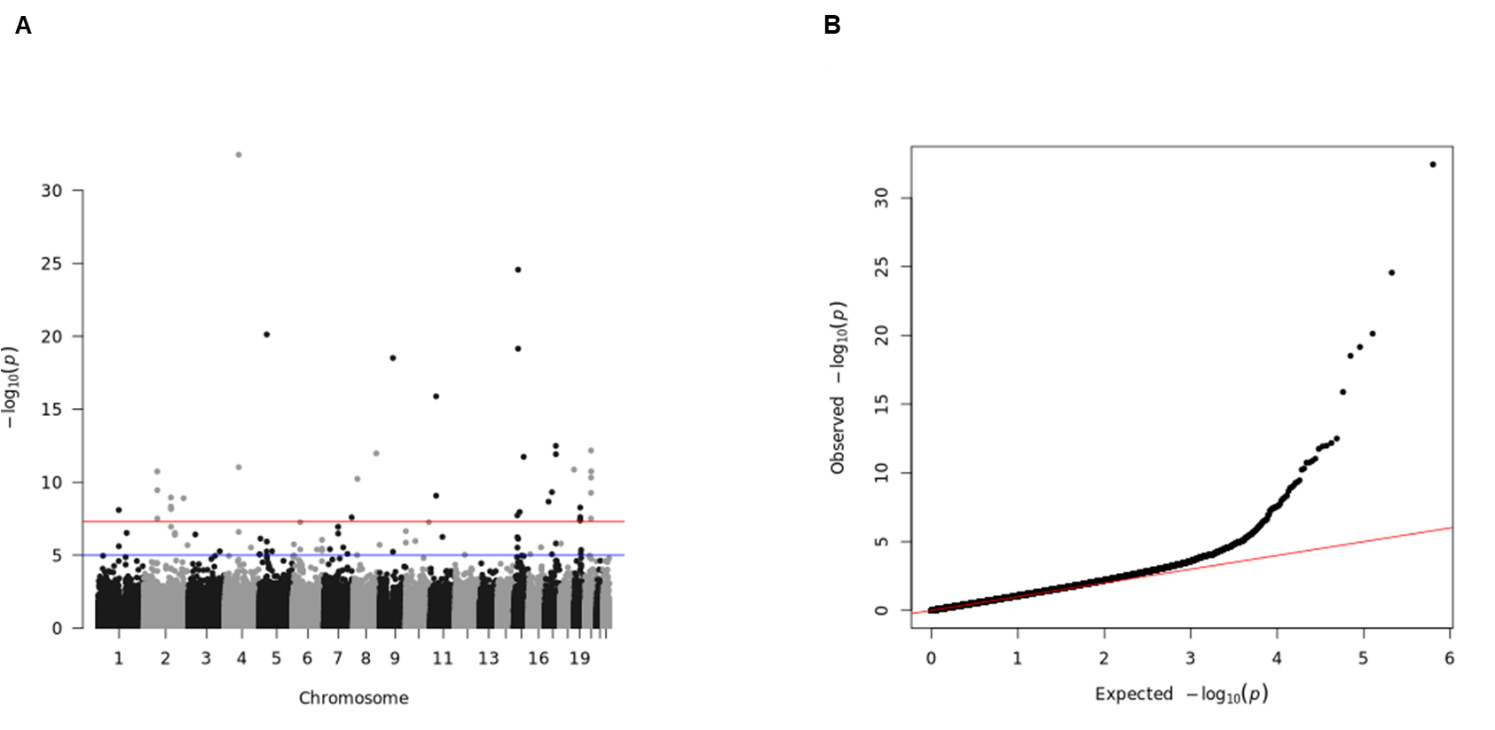


**Fig S41.** **Manhattan plot and Q-Q plot for the single-variant association test for CREA in the imputed genotype array base reference dataset (UKB**). (**A)** Manhattan plot. Blue line represents significance threshold at P-value < 0.05. Red line represents genome-wide significance threshold at P-value < 5E-08. (**B)** Q-Q plot.


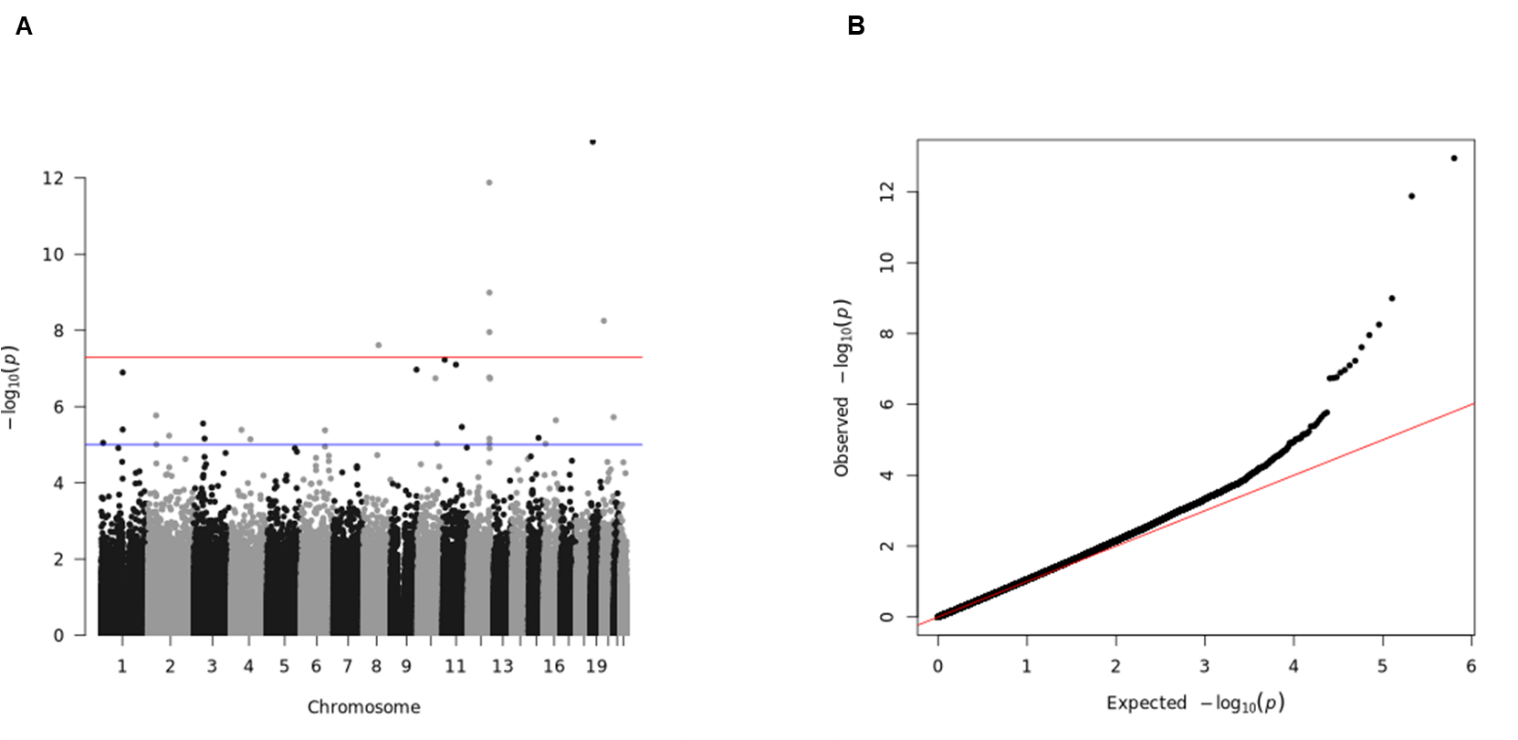


**Fig S42.** **Manhattan plot and Q-Q plot for the single-variant association test for DBP in the imputed genotype array base reference dataset (UKB**). (**A)** Manhattan plot. Blue line represents significance threshold at P-value < 0.05. Red line represents genome-wide significance threshold at P-value < 5E-08. (**B)** Q-Q plot.


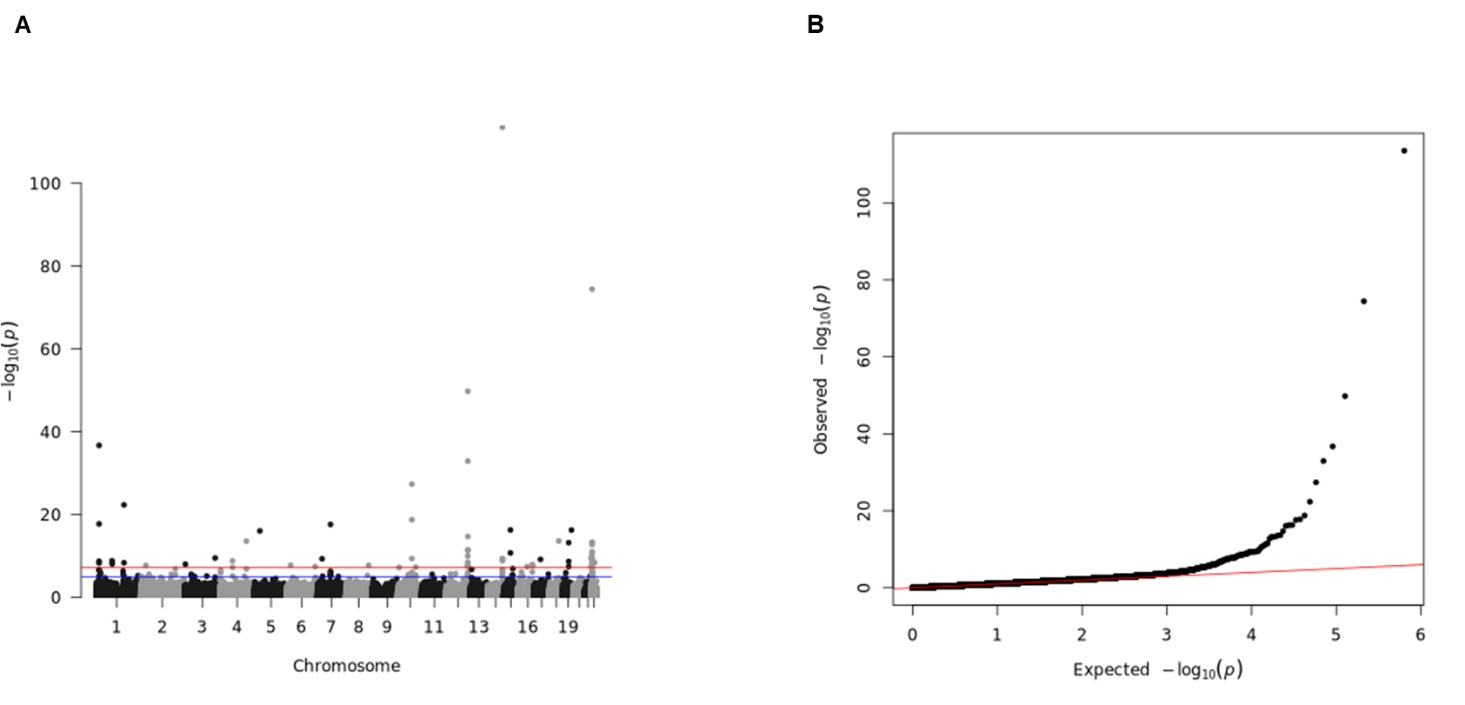


**Fig S43.** **Manhattan plot and Q-Q plot for the single-variant association test for GGT in the imputed genotype array base reference dataset (UKB**). (**A)** Manhattan plot. Blue line represents significance threshold at P-value < 0.05. Red line represents genome-wide significance threshold at P-value < 5E-08. (**B)** Q-Q plot.


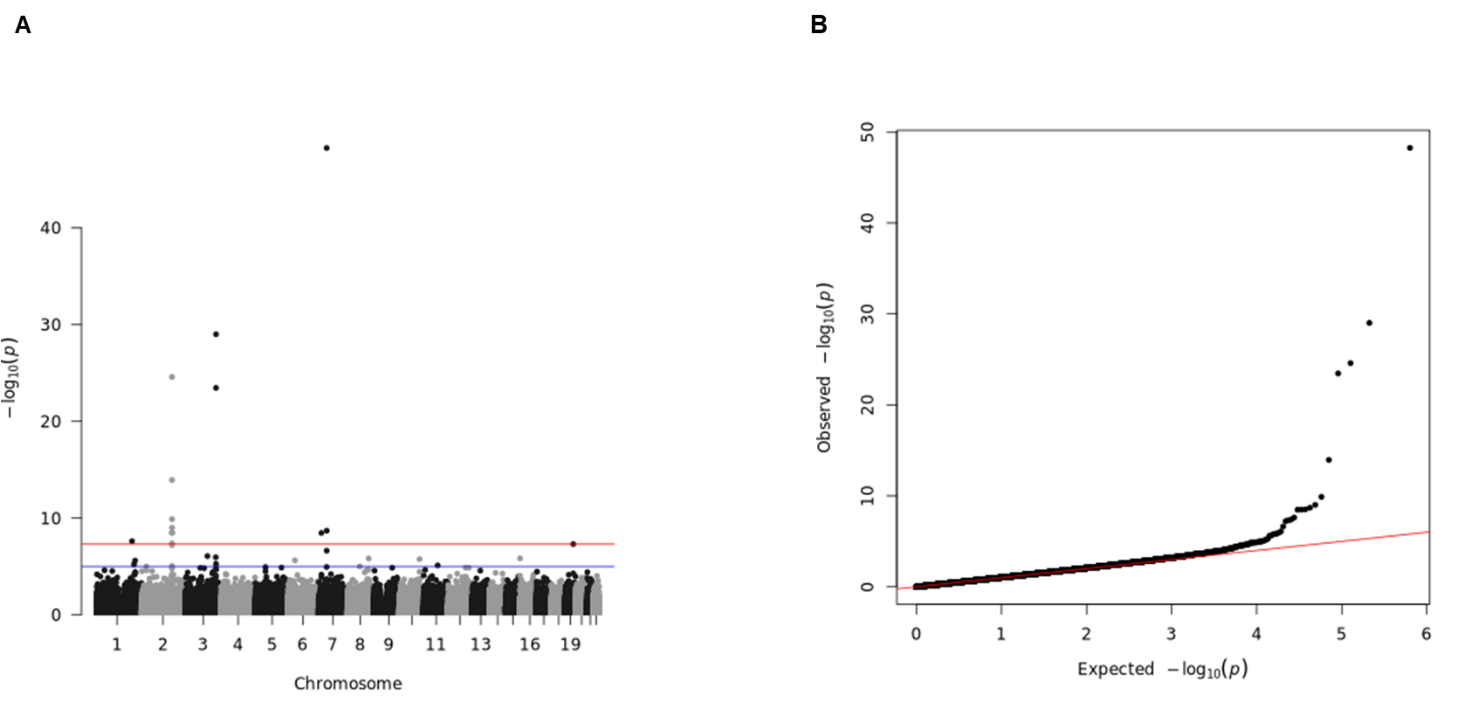


**Fig S44.** **Manhattan plot and Q-Q plot for the single-variant association test for GLUC in the imputed genotype array base reference dataset (UKB**). (**A)** Manhattan plot. Blue line represents significance threshold at P-value < 0.05. Red line represents genome-wide significance threshold at P-value < 5E-08. (**B)** Q-Q plot.


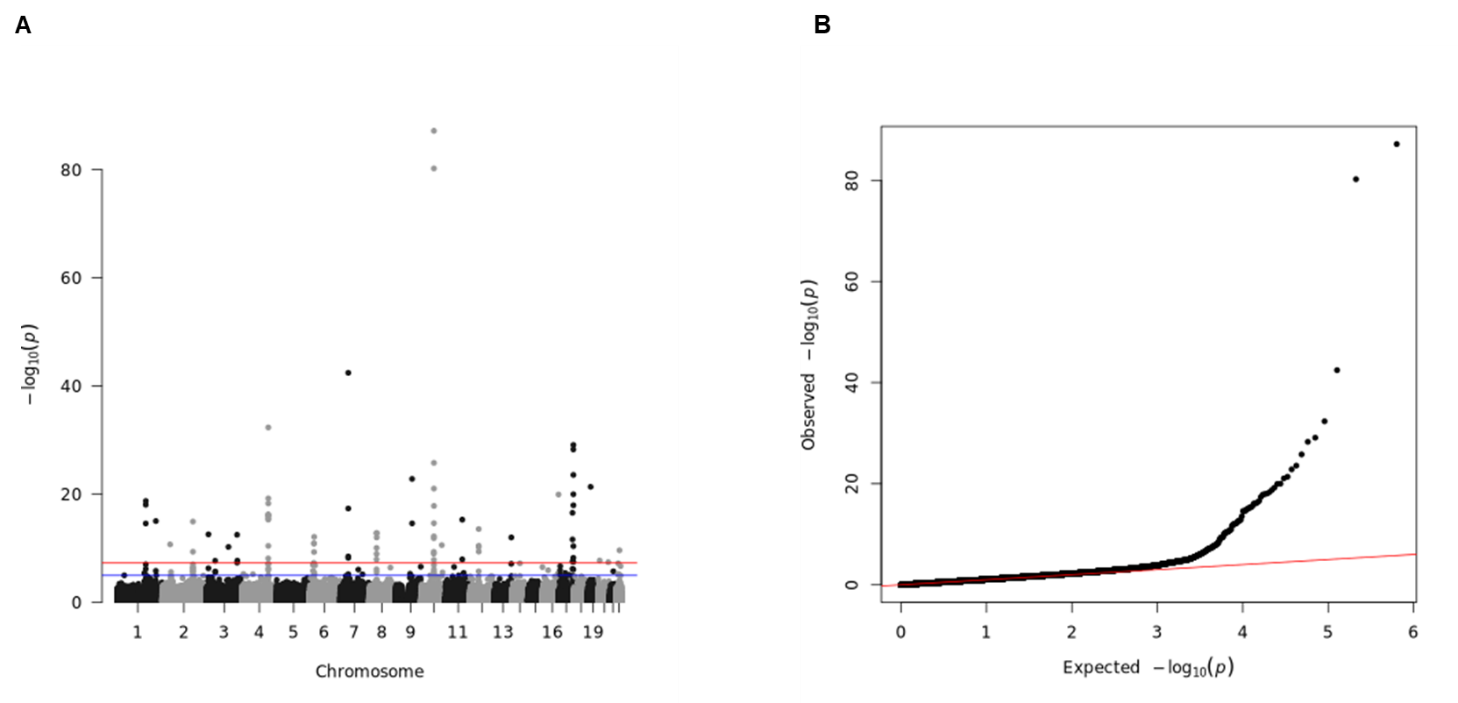


**Fig S45.** **Manhattan plot and Q-Q plot for the single-variant association test for HBA1C in the imputed genotype array base reference dataset (UKB**). (**A)** Manhattan plot. Blue line represents significance threshold at P-value < 0.05. Red line represents genome-wide significance threshold at P-value < 5E-08. (**B)** Q-Q plot.


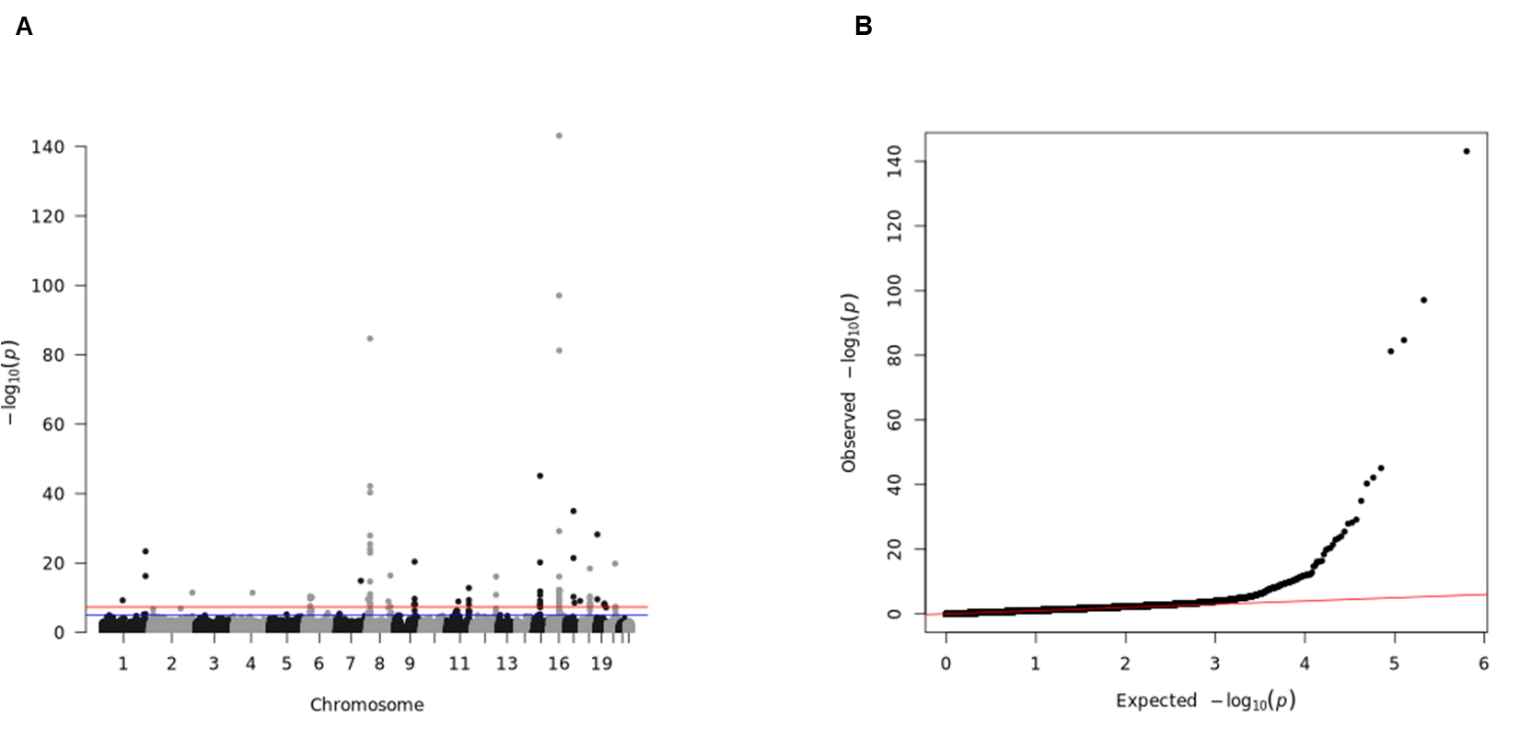


**Fig S46.** **Manhattan plot and Q-Q plot for the single-variant association test for HDL in the imputed genotype array base reference dataset (UKB**). (**A)** Manhattan plot. Blue line represents significance threshold at P-value < 0.05. Red line represents genome-wide significance threshold at P-value < 5E-08. (**B)** Q-Q plot.


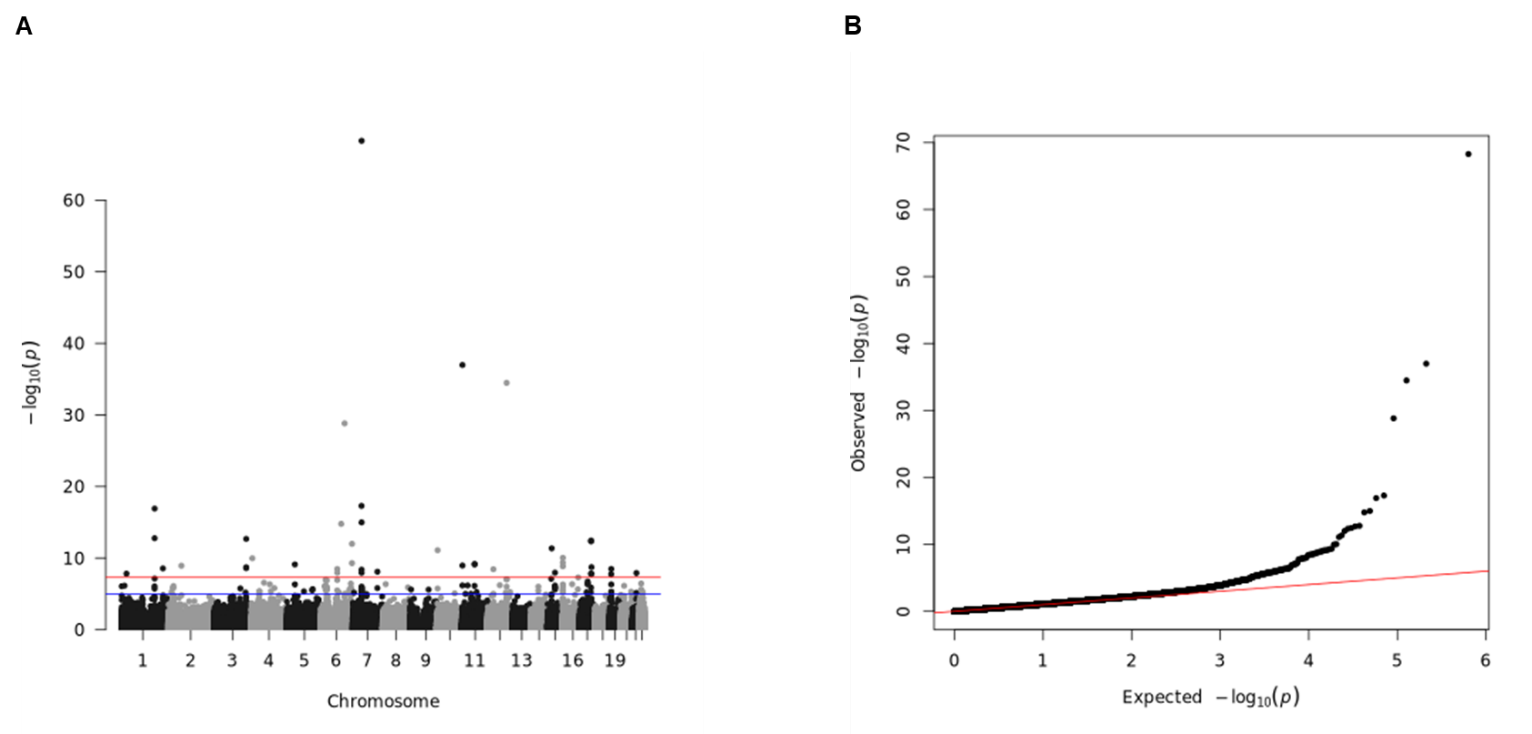


**Fig S47.** **Manhattan plot and Q-Q plot for the single-variant association test for IGF1 in the imputed genotype array base reference dataset (UKB**). (**A)** Manhattan plot. Blue line represents significance threshold at P-value < 0.05. Red line represents genome-wide significance threshold at P-value < 5E-08. (**B)** Q-Q plot.


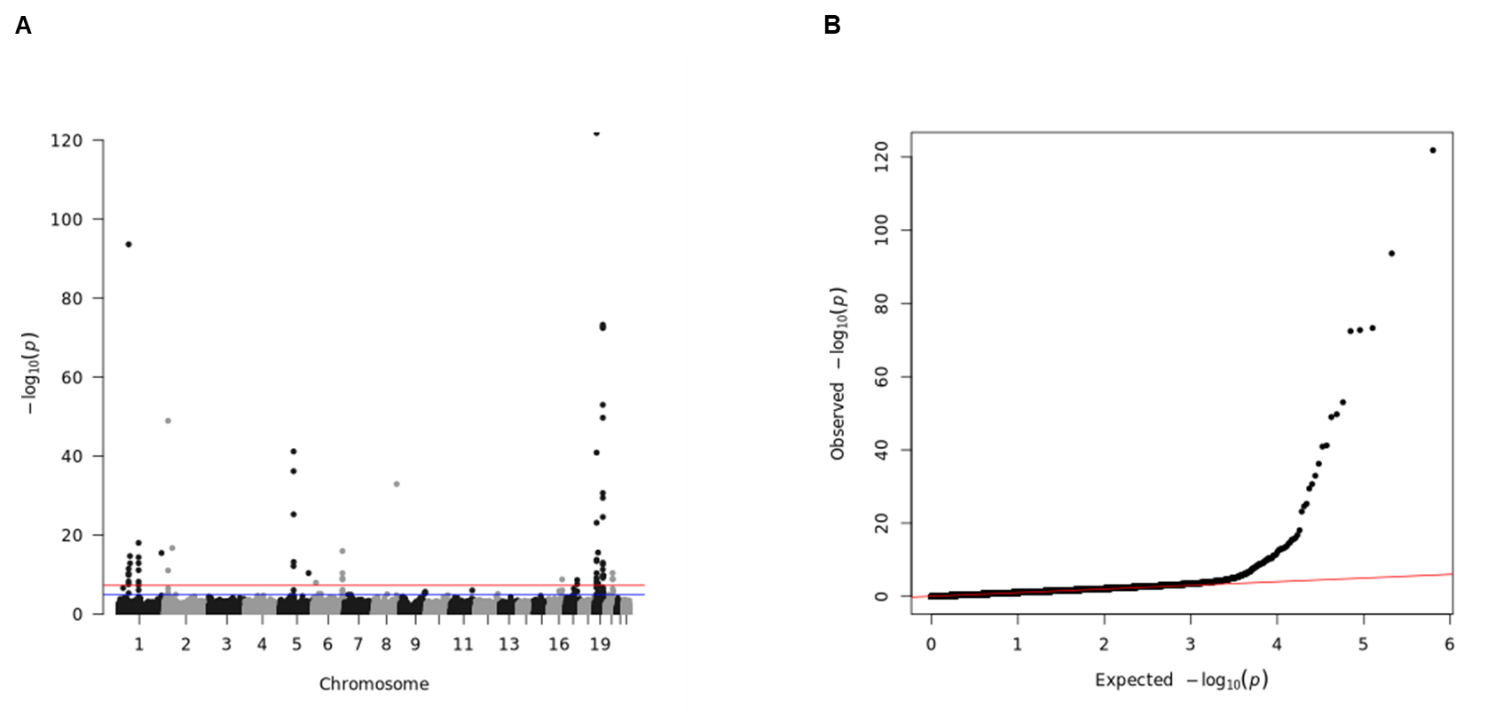


**Fig S48.** **Manhattan plot and Q-Q plot for the single-variant association test for LDL in the imputed genotype array base reference dataset (UKB**). (**A)** Manhattan plot. Blue line represents significance threshold at P-value < 0.05. Red line represents genome-wide significance threshold at P-value < 5E-08. (**B)** Q-Q plot.


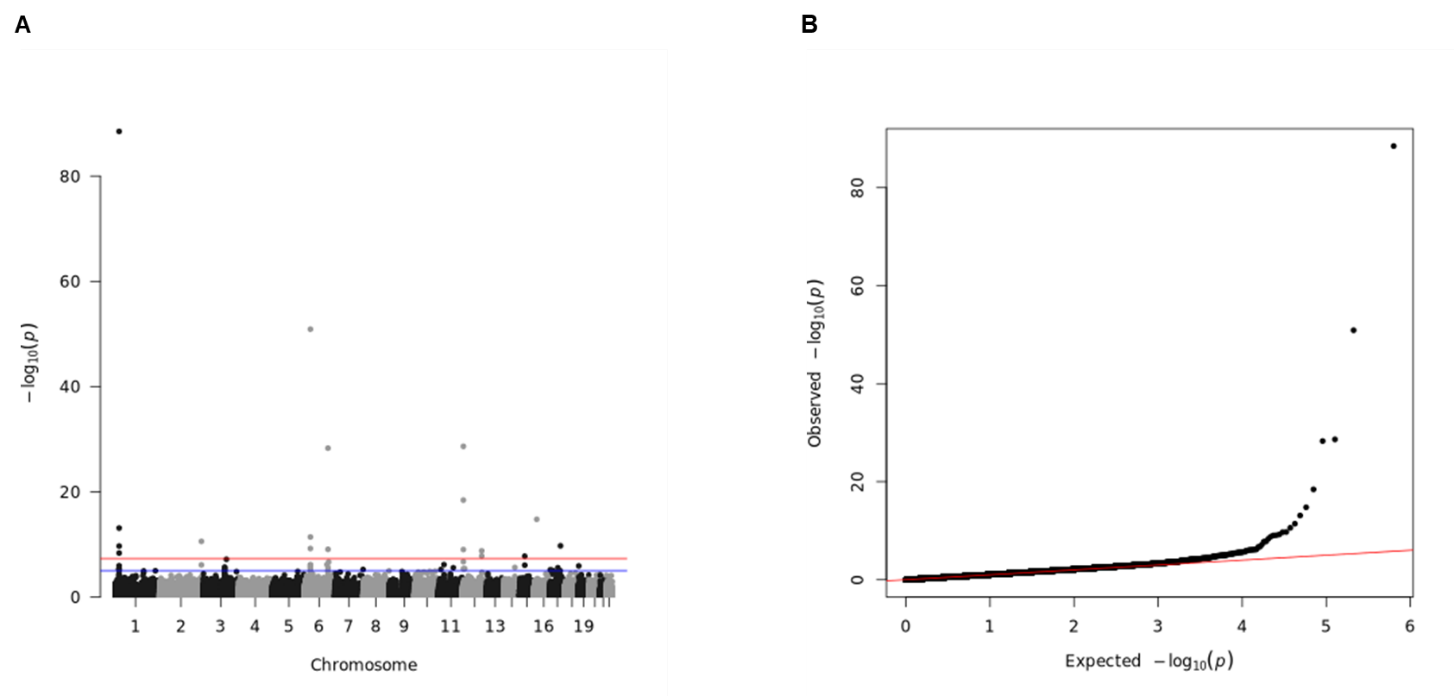


**Fig S49.** **Manhattan plot and Q-Q plot for the single-variant association test for PHOS in the imputed genotype array base reference dataset (UKB**). (**A)** Manhattan plot. Blue line represents significance threshold at P-value < 0.05. Red line represents genome-wide significance threshold at P-value < 5E-08. (**B)** Q-Q plot.


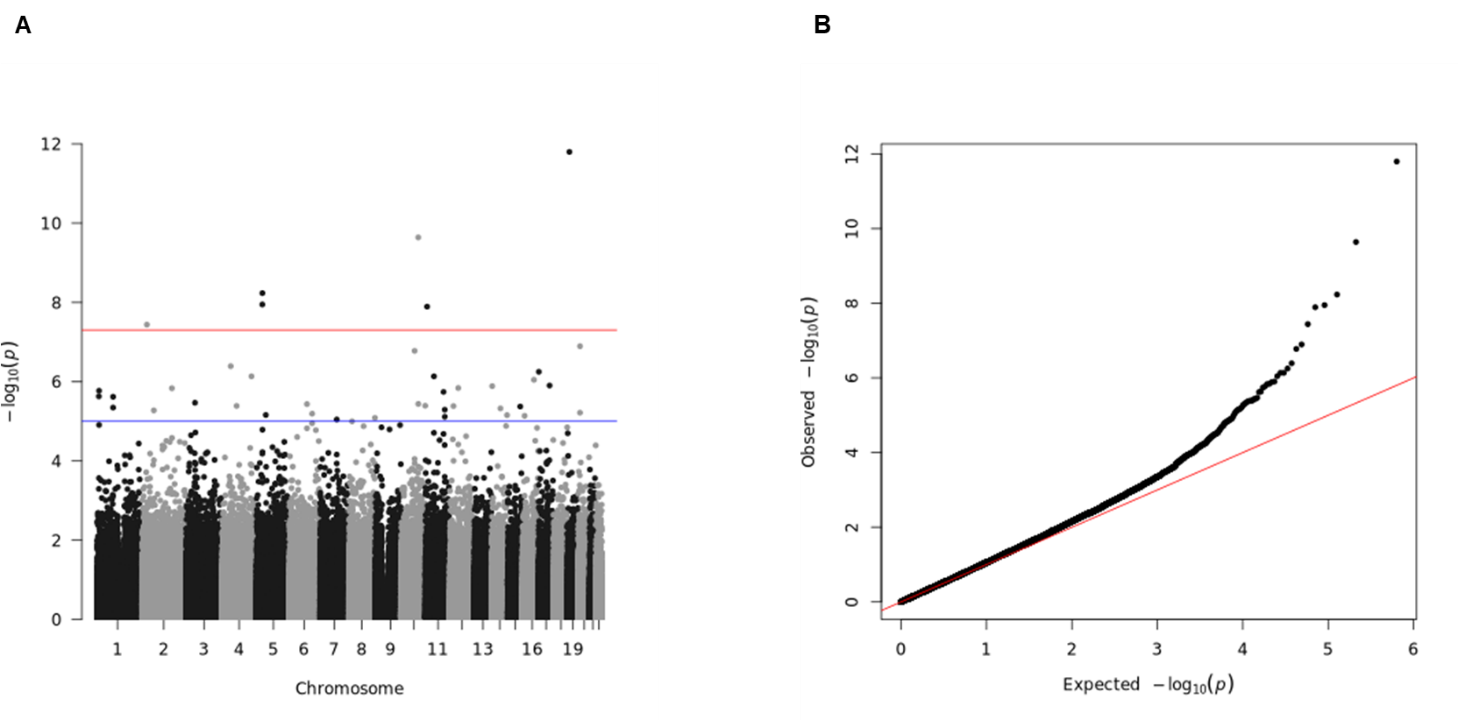


**Fig S50.** **Manhattan plot and Q-Q plot for the single-variant association test for SBP in the imputed genotype array base reference dataset (UKB**). (**A)** Manhattan plot. Blue line represents significance threshold at P-value < 0.05. Red line represents genome-wide significance threshold at P-value < 5E-08. (**B)** Q-Q plot.


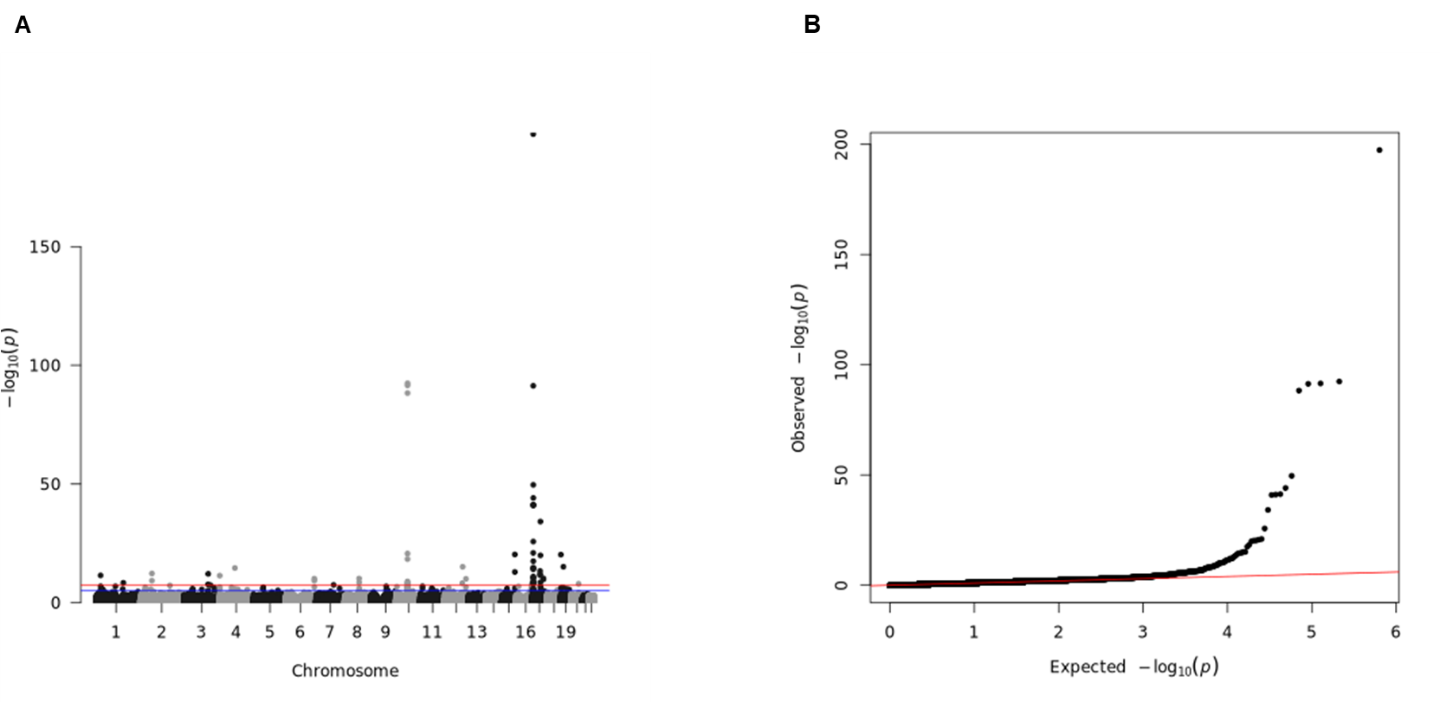


**Fig S51.** **Manhattan plot and Q-Q plot for the single-variant association test for SHBG in the imputed genotype array base reference dataset (UKB**). (**A)** Manhattan plot. Blue line represents significance threshold at P-value < 0.05. Red line represents genome-wide significance threshold at P-value < 5E-08. (**B)** Q-Q plot.


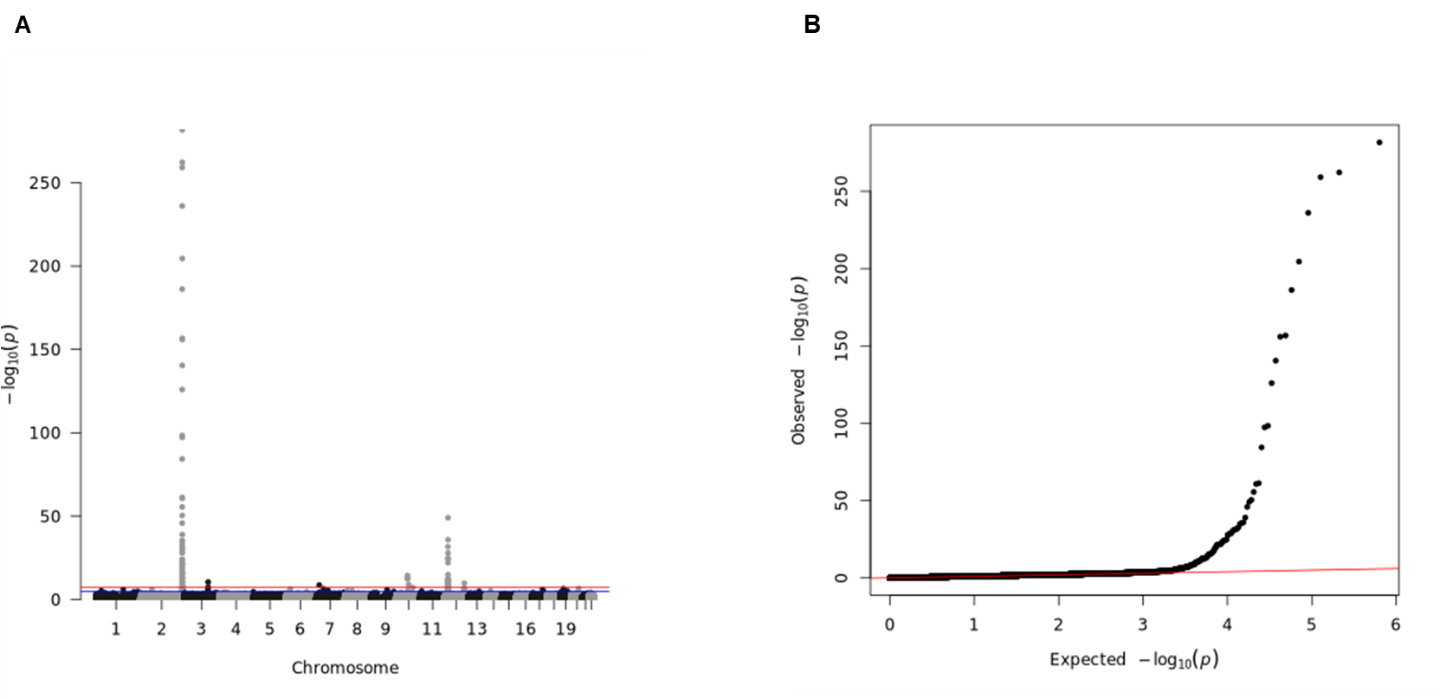


**Fig S52.** **Manhattan plot and Q-Q plot for the single-variant association test for TBIL in the imputed genotype array base reference dataset (UKB**). (**A)** Manhattan plot. Blue line represents significance threshold at P-value < 0.05. Red line represents genome-wide significance threshold at P-value < 5E-08. (**B)** Q-Q plot.


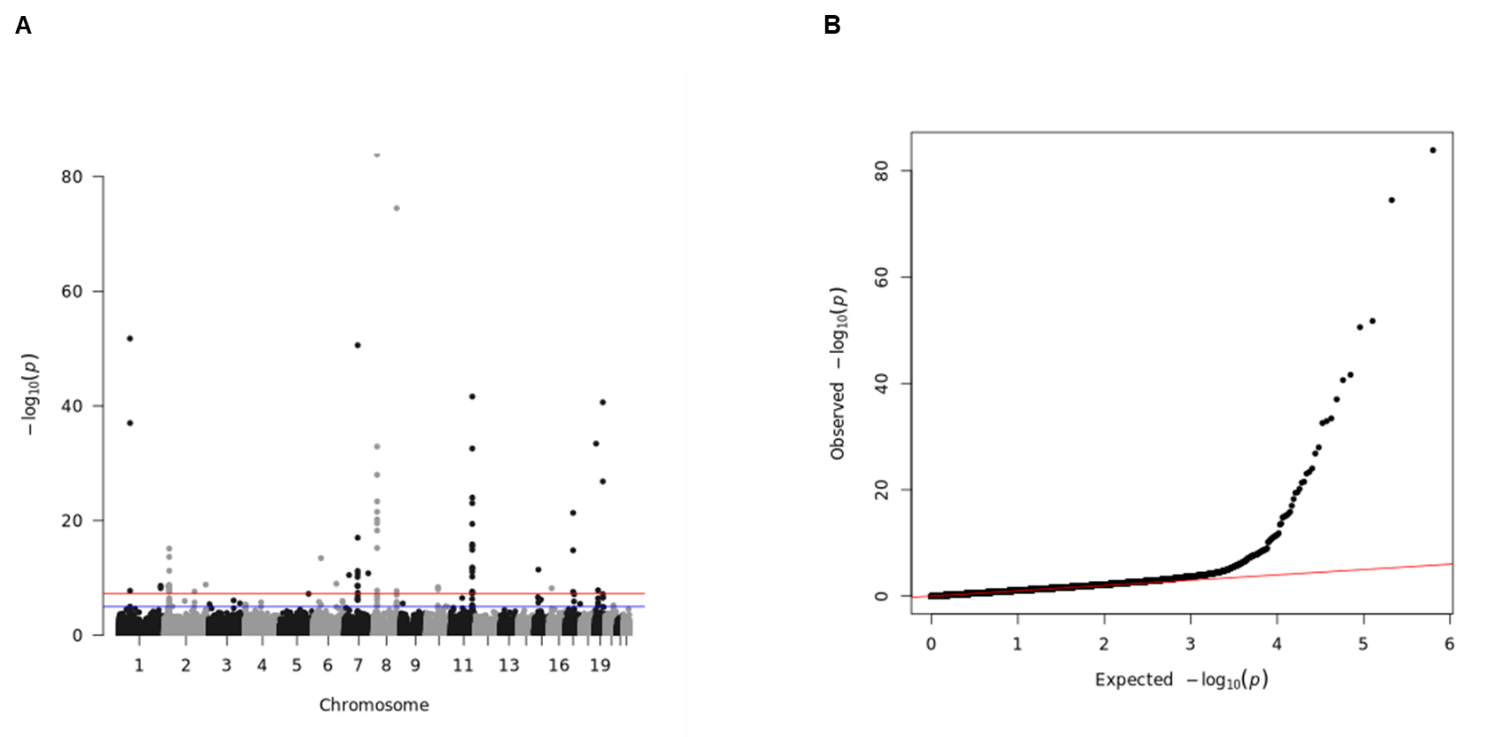


**Fig S53.** **Manhattan plot and Q-Q plot for the single-variant association test for TRIG in the imputed genotype array base reference dataset (UKB**). (**A)** Manhattan plot. Blue line represents significance threshold at P-value < 0.05. Red line represents genome-wide significance threshold at P-value < 5E-08.(**B)** Q-Q plot.


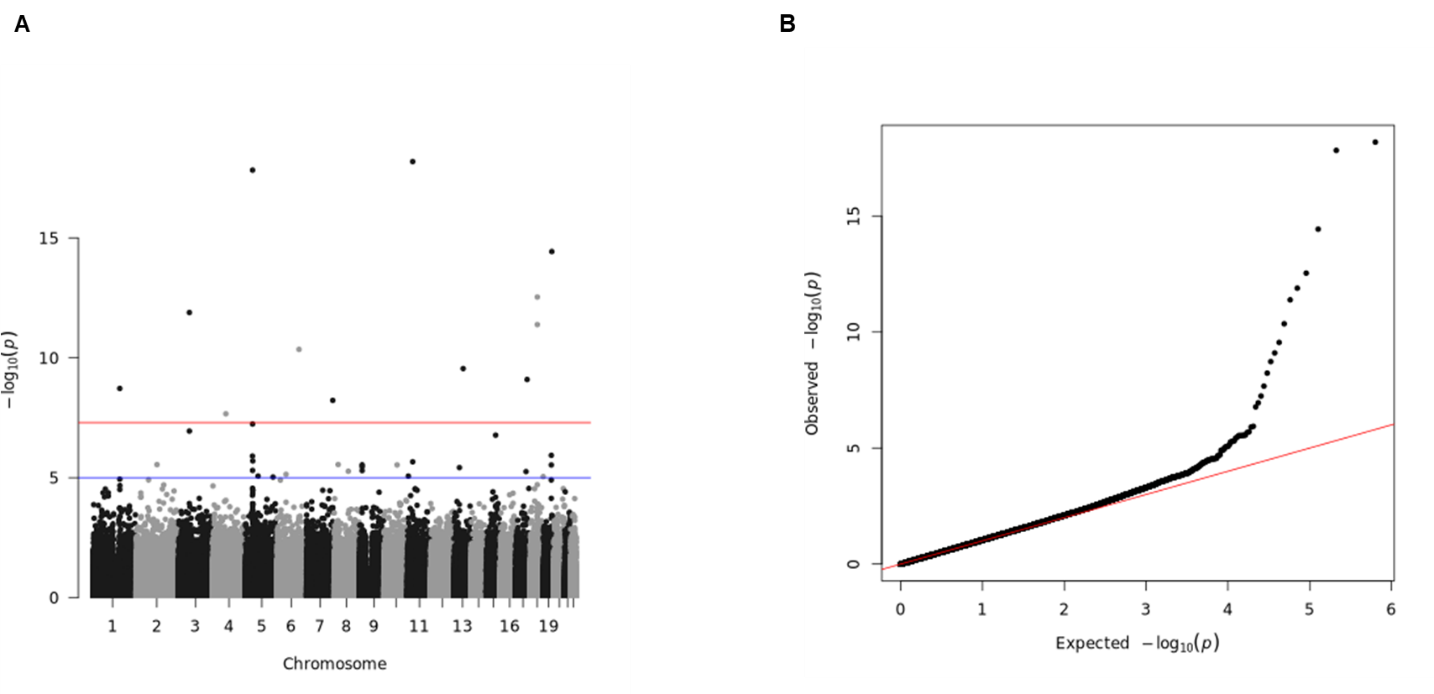


**Fig S54.** **Manhattan plot and Q-Q plot for the single-variant association test for URA in the imputed genotype array base reference dataset (UKB**). (**A)** Manhattan plot. Blue line represents significance threshold at P-value < 0.05. Red line represents genome-wide significance threshold at P-value < 5E-08. (**B)** Q-Q plot.


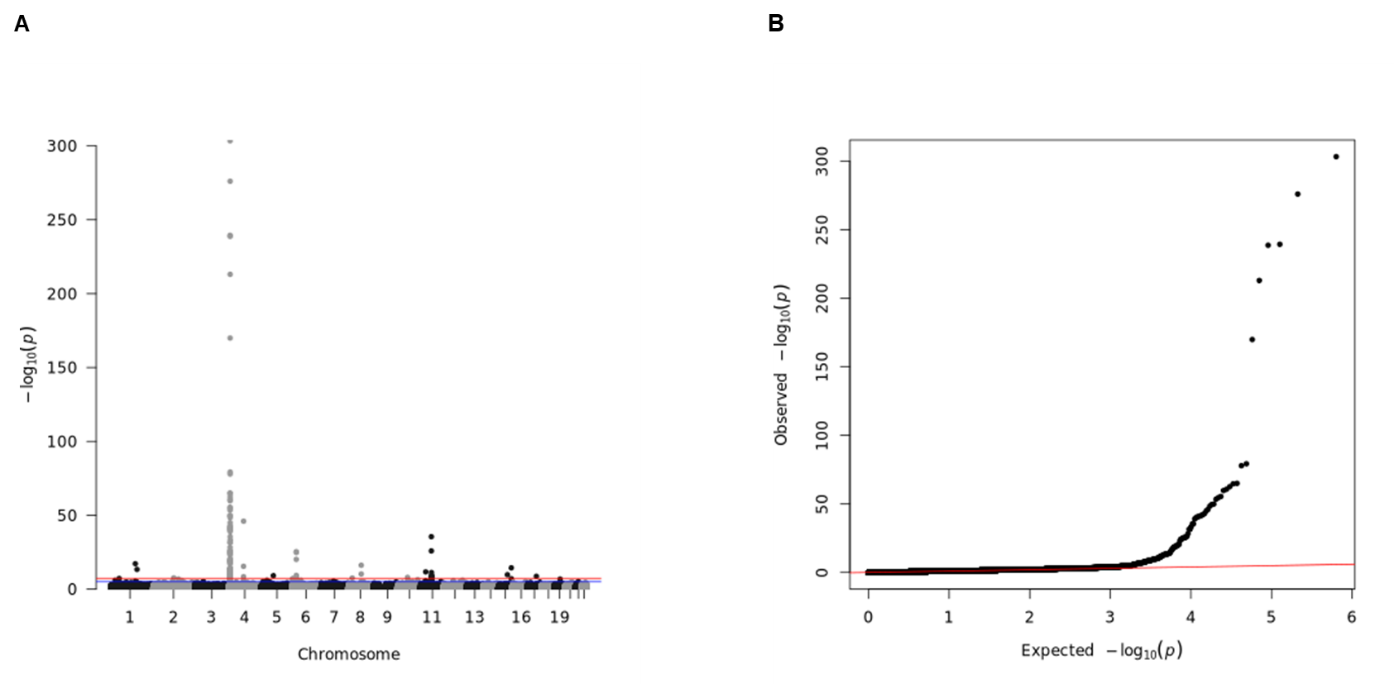


**Fig S55.** **Manhattan plot and Q-Q plot for the single-variant association test for URT in the imputed genotype array base reference dataset (UKB**). (**A)** Manhattan plot. Blue line represents significance threshold at P-value < 0.05. Red line represents genome-wide significance threshold at P-value < 5E-08. (**B)** Q-Q plot.


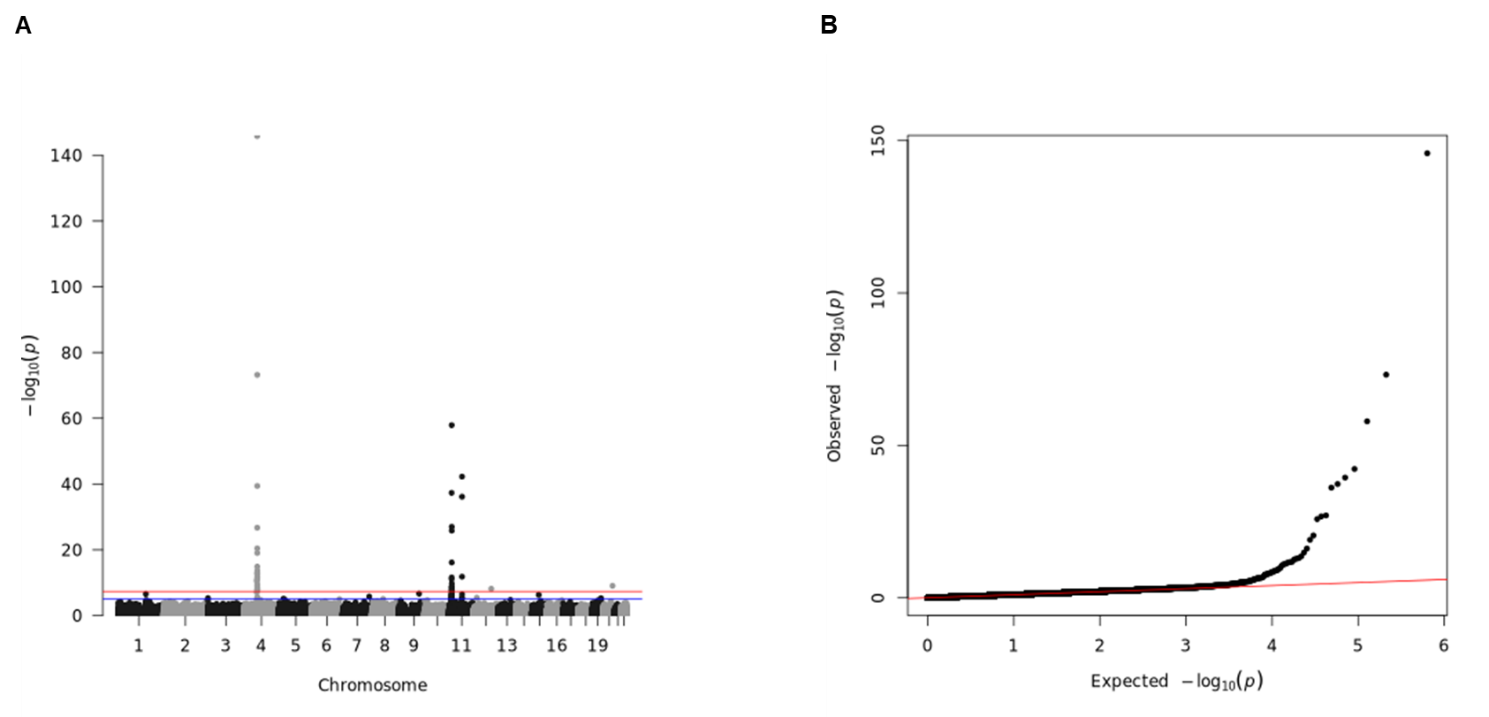


**Fig S56.** **Manhattan plot and Q-Q plot for the single-variant association test for VITD in the imputed genotype array base reference dataset (UKB**). (**A)** Manhattan plot. Blue line represents significance threshold at P-value < 0.05. Red line represents genome-wide significance threshold at P-value < 5E-08. (**B)** Q-Q plot.


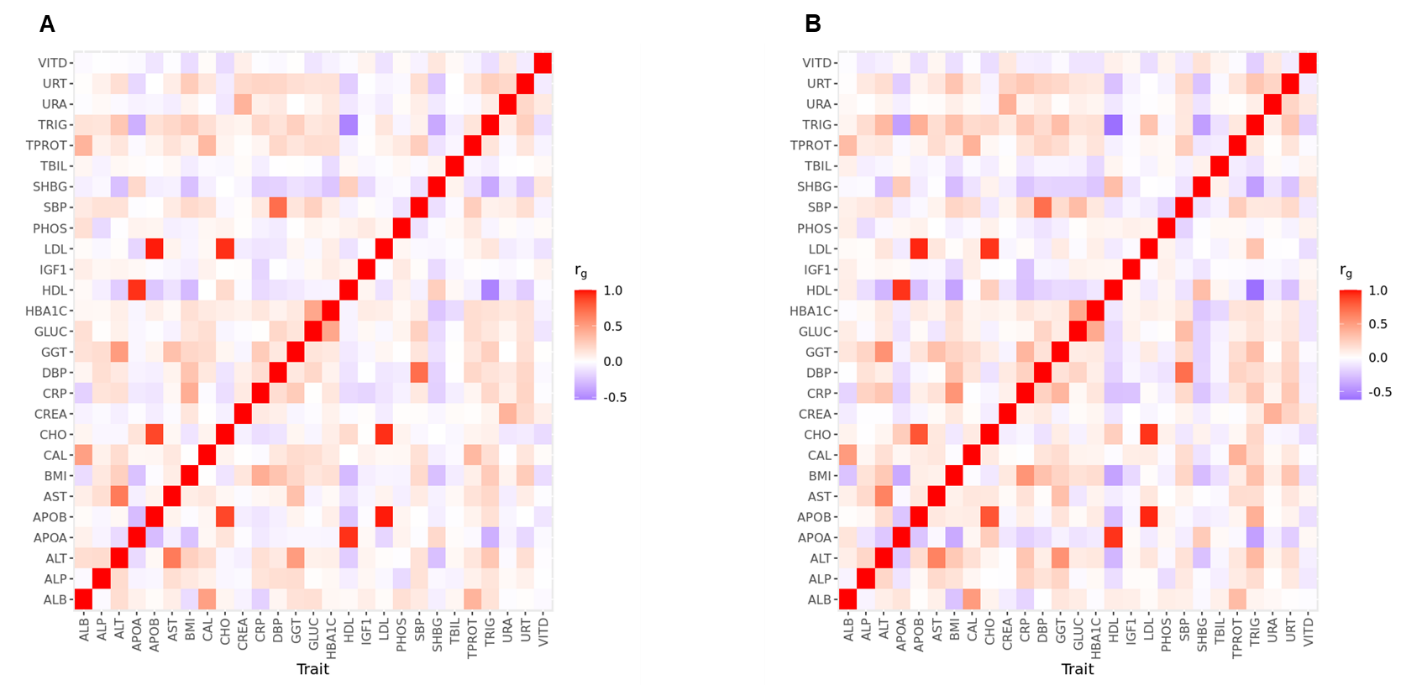


**Figure S57.** **Genetic correlation between traits using the individual-level genotype data of the reference base datasets (UKB**) **using SCORE**. (**A)** WES base dataset. (**B)** Imputed genotype array base dataset. No differences were observed between platforms (t-test P-value = 0.81).


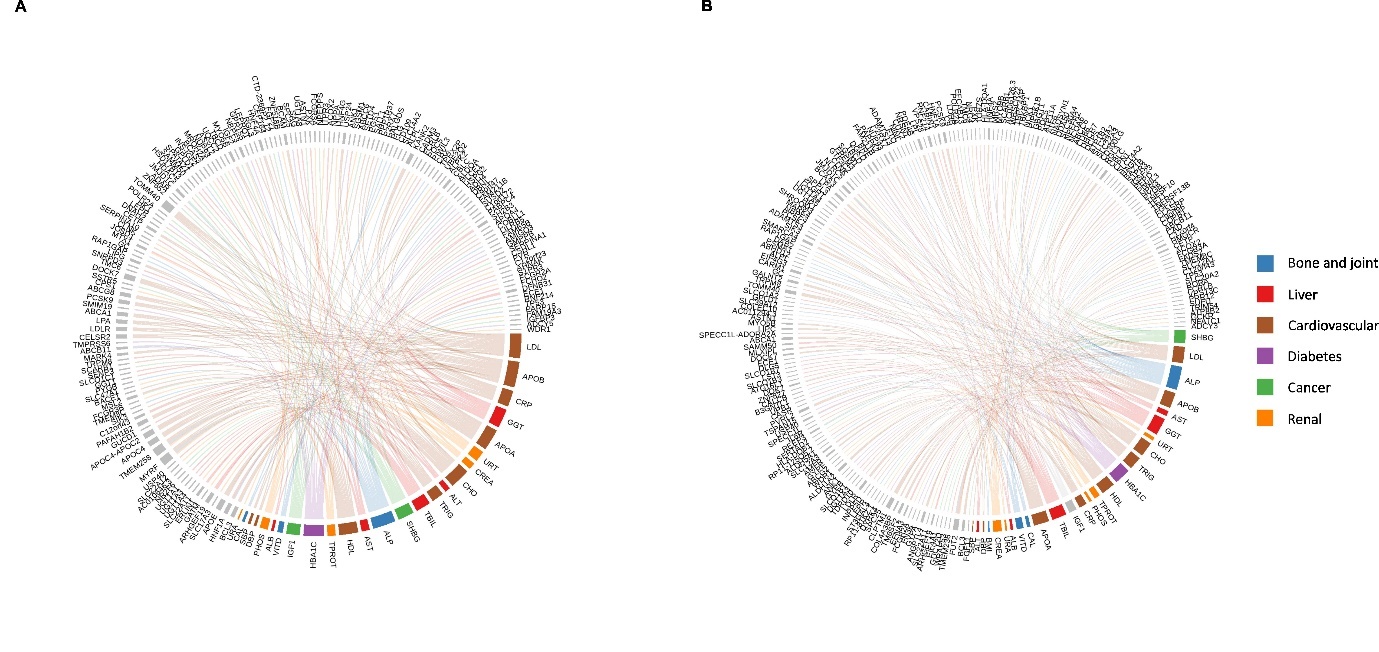


**Figure S58.** **Circular representation of the association results obtained from MAGMA using FUMA**. (**A)** Chord diagram for the WES base dataset at Bonferroni P-value < 3.36E-08. (**B)** Chord diagrams of the imputed genotype array base dataset Bonferroni P-value < 3.36E-08.


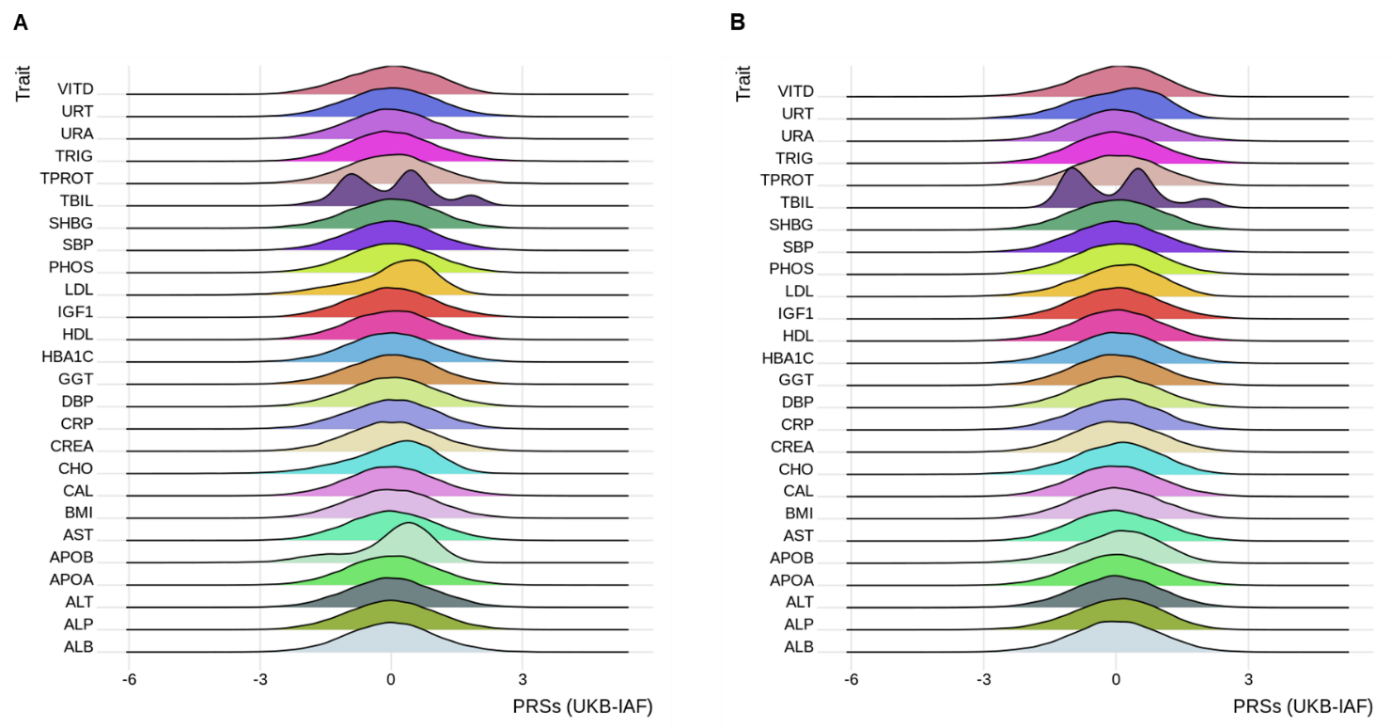


**Figure S59.** **Distribution plots of PRSs for the merged dataset composed by the reference validation set (UKB) and the target cohort (IAF)**. (**A)** PRSs estimated using the summary statistics generated from the exome-based reference validation set. (**B)** PRSs estimated using the summary statistics generated from the imputed array-based refence validation set.


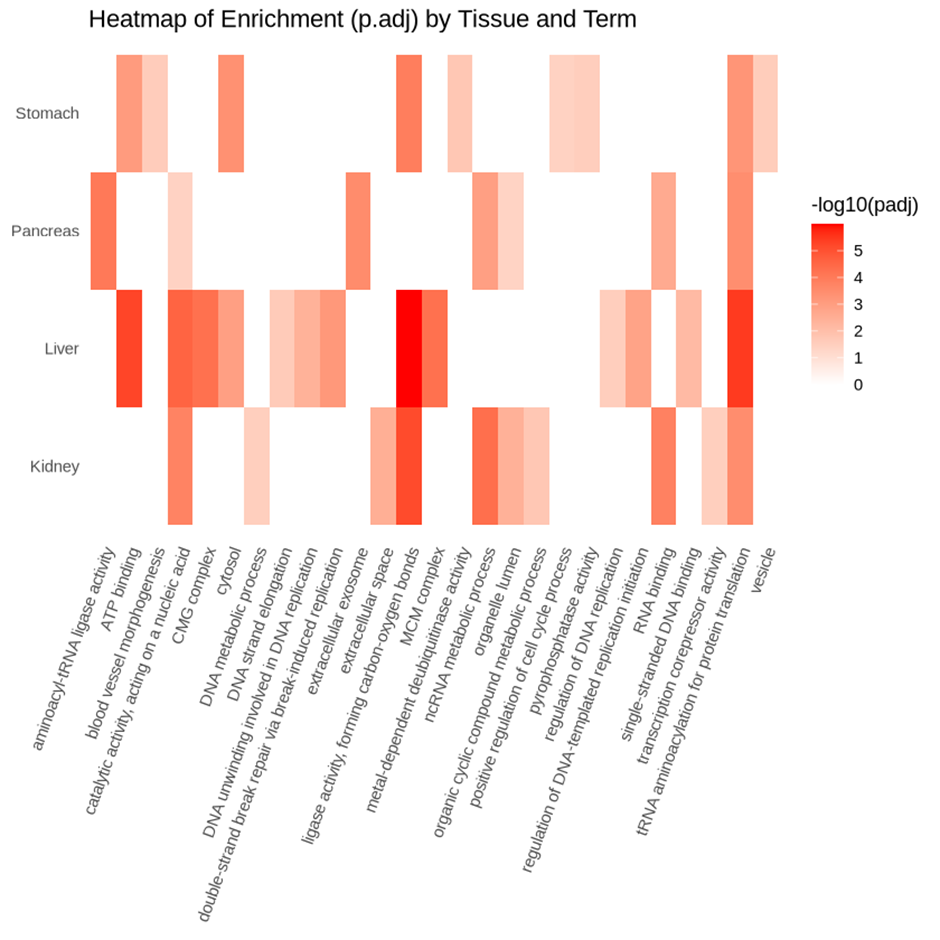


**Figure S60. Heatmap from the enrichment analysis on the generated tissue-specific networks.**

**Supplementary Tables**

**Table S1. Overview of the clinical biomarkers and disease outcomes analyzed in this study.** Definition of the 24 blood biochemistry measurements and three physical measurements used for genetic analyses and polygenic risk modeling, and 17 disease outcomes for association analyses with genetic risk scores and causal inference.

| **Phenotypes** | **Identifiers** | **Type** | **Panel** |
| --- | --- | --- | --- |
| Albumin | ALB | Blood biochemistry measurement | Liver |
| Alkaline phosphatase | ALP | Blood biochemistry measurement | Liver |
| Alanine transferase | ALT | Blood biochemistry measurement | Liver |
| Apolipoprotein A | APOA | Blood biochemistry measurement | Cardiovascular |
| Apolipoprotein B | APOB | Blood biochemistry measurement | Cardiovascular |
| Aspartate transferase | AST | Blood biochemistry measurement | Liver |
| Calcium | CAL | Blood biochemistry measurement | Bone and joint |
| Cholesterol | CHO | Blood biochemistry measurement | Cardiovascular |
| Creatinine | CREA | Blood biochemistry measurement | Renal |
| C-reactive protein | CRP | Blood biochemistry measurement | Cardiovascular |
| γ-Glutamyl transferase | GGT | Blood biochemistry measurement | Liver |
| Glucose | GLUC | Blood biochemistry measurement | Diabetes |
| Glycated hemoglobin | HBA1C | Blood biochemistry measurement | Diabetes |
| HDL cholesterol | HDL | Blood biochemistry measurement | Cardiovascular |
| Insulin-like growth factor 1 | IGF1 | Blood biochemistry measurement | Cancer |
| LDL cholesterol | LDL | Blood biochemistry measurement | Cardiovascular |
| Phosphate | PHOS | Blood biochemistry measurement | Renal |
| Sex hormone binding globulin | SHBG | Blood biochemistry measurement | Cancer |
| Total bilirubin | TBIL | Blood biochemistry measurement | Liver |
| Total protein | TPROT | Blood biochemistry measurement | Renal |
| Triglycerides | TRIG | Blood biochemistry measurement | Cardiovascular |
| Urea | URA | Blood biochemistry measurement | Renal |
| Urate | URT | Blood biochemistry measurement | Renal |
| Vitamin D | VITD | Blood biochemistry measurement | Bone and joint |
| Body mass index | BMI | Physical measurement | Anthropometric |
| Diastolic blood pressure | DBP | Physical measurement | Cardiovascular |
| Systolic blood pressure | SBP | Physical measurement | Cardiovascular |
| Depression | DEP | Disease outcome | Mental disorders |
| Anxiety | ANX | Disease outcome | Mental disorders |
| Ischemic heart disease | ISC | Disease outcome | Cardiovascular disease |
| Myocardial infarction | MYO | Disease outcome | Cardiovascular disease |
| Angina pectoris | ANG | Disease outcome | Cardiovascular disease |
| Coronary atherosclerosis | CAD | Disease outcome | Cardiovascular disease |
| Hypertension | HYP | Disease outcome | Cardiovascular disease |
| Chronic obstructive pulmonary disease | COPD | Disease outcome | Respiratory disease |
| Breast cancer | BREAST | Disease outcome | Cancer |
| Prostate cancer | PROST | Disease outcome | Cancer |
| Osteoarthrosis | OA | Disease outcome | Musculoskeletal |
| Rheumatoid arthritis | RA | Disease outcome | Musculoskeletal |
| Dorsopathies | BPAIN | Disease outcome | Musculoskeletal |
| Cervicalgia | NPAIN | Disease outcome | Musculoskeletal |
| Type 2 diabetes | T2D | Disease outcome | Diabetes |
| Obesity | OBS | Disease outcome | Overweight |
| Pneumonia and influenza-related pneumonia | FLU | Disease outcome | Infectious disease |

**Table S2. Summary of baseline characteristics for the reference and target cohorts.** Overview of the cohorts used in this study. The UK Biobank (N=105,506; quality-controlled) was used as a reference cohort for genetic analyses of clinical biomarkers and estimation of polygenic risk scores. The VITO IAM Frontier (N = 30) study was used as a target cohort for prediction of polygenic risk scores, using a hold-out set from the reference cohort.

| **Gender** | **Mean age** | **Minimum** | **Maximum** | **Count** | **Cohort** |
| --- | --- | --- | --- | --- | --- |
| Female | 56.48 | 40 | 70 | 64016 | UKB (European-British QC) |
| Male | 55.72 | 39 | 72 | 41490 | UKB (European-British QC) |
| Female | 50.67 | 45 | 58 | 15 | IAF |
| Male | 50.80 | 45 | 58 | 15 | IAF |

**Table S3. Summary of the biomarker measurements used in this study (reference dataset).** Summary statistics of 27 clinical biomarker measurements from the UK Biobank.

| **Measurement** | **Units** | **UKB Data field** | **Mean** | **SD** | **Minimum** | **Maximum** |
| --- | --- | --- | --- | --- | --- | --- |
| ALB | gL-1 | 30600 | 45.25 | 2.55 | 28.13 | 59.46 |
| ALP | UL-1 | 30610 | 83.19 | 24.46 | 8.00 | 903.70 |
| ALT | UL-1 | 30620 | 22.55 | 13.21 | 3.01 | 403.91 |
| APOA | gL-1 | 30630 | 1.56 | 0.27 | 0.42 | 2.50 |
| APOB | gL-1 | 30640 | 1.03 | 0.21 | 0.40 | 1.92 |
| AST | UL-1 | 30650 | 25.64 | 9.44 | 4.10 | 400.60 |
| CAL | mmolL-1 | 30680 | 2.38 | 0.09 | 1.60 | 3.57 |
| CHO | mmolL-1 | 30690 | 5.74 | 0.94 | 2.29 | 9.95 |
| CREA | umolL-1 | 30700 | 71.07 | 14.75 | 16.50 | 723.90 |
| CRP | mgL-1 | 30710 | 2.53 | 4.22 | 0.08 | 78.17 |
| GGT | UL-1 | 30730 | 34.23 | 36.20 | 5.00 | 1165.90 |
| GLUC | mmolL-1 | 30740 | 5.04 | 0.98 | 1.30 | 27.19 |
| HBA1C | mmolmol-1 | 30750 | 35.31 | 5.48 | 15.30 | 213.90 |
| HDL | mmolL-1 | 30760 | 1.48 | 0.36 | 0.35 | 3.61 |
| IGF1 | nmolL-1 | 30770 | 21.52 | 5.60 | 2.02 | 108.44 |
| LDL | mmolL-1 | 30780 | 3.59 | 0.74 | 0.81 | 6.68 |
| PHOS | mmolL-1 | 30810 | 1.17 | 0.16 | 0.46 | 4.70 |
| SHBG | nmolL-1 | 30830 | 53.78 | 28.11 | 0.47 | 241.92 |
| TBIL | umolL-1 | 30840 | 9.01 | 4.33 | 1.08 | 66.04 |
| TPROT | gL-1 | 30860 | 72.40 | 3.95 | 53.71 | 110.69 |
| TRIG | mmolL-1 | 30870 | 1.67 | 0.92 | 0.27 | 10.66 |
| URA | mmolL-1 | 30670 | 5.37 | 1.30 | 1.20 | 38.20 |
| URT | umolL-1 | 30880 | 301.69 | 77.45 | 90.90 | 749.90 |
| VITD | nmolL-1 | 30890 | 49.86 | 20.66 | 10.00 | 234.00 |
| BMI | kgm-2 | 21001 | 27.14 | 4.70 | 12.12 | 68.95 |
| DBP | mmHg | 4079 | 81.79 | 9.97 | 43.00 | 147.50 |
| SBP | mmHg | 4080 | 137.36 | 18.25 | 78.00 | 253.00 |

**Table S4. Summary of the biomarker measurements used in this study (target dataset).** Summary statistics of 26 clinical biomarker measurements from the IAM Frontier cohort.

| **Measurement** | **Units** | **Mean** | **SD** | **Minimum** | **Maximum** |
| --- | --- | --- | --- | --- | --- |
| ALB | gL-1 | 45.92 | 2.20 | 42.50 | 50.00 |
| ALP | UL-1 | 67.60 | 15.36 | 41.50 | 95.00 |
| APOA | UL-1 | 1.71 | 0.29 | 1.21 | 2.48 |
| APOB | gL-1 | 0.95 | 0.20 | 0.55 | 1.28 |
| TBIL | gL-1 | 0.75 | 0.20 | 0.46 | 1.23 |
| CAL | UL-1 | 2.42 | 0.15 | 2.30 | 3.11 |
| CHO | mmolL-1 | 208.98 | 29.11 | 150.50 | 269.00 |
| CREA | mmolL-1 | 0.96 | 0.15 | 0.71 | 1.23 |
| CRP | umolL-1 | 1.58 | 1.34 | 0.35 | 5.73 |
| PHOS | mgL-1 | 3.63 | 2.31 | 1.19 | 12.17 |
| GGT | UL-1 | 26.25 | 18.48 | 13.00 | 94.00 |
| HBA1C | mmolL-1 | 35.74 | 3.41 | 29.00 | 44.90 |
| HDL | mmolmol-1 | 60.97 | 15.66 | 32.00 | 102.00 |
| IGF1 | mmolL-1 | 132.57 | 39.83 | 50.00 | 223.00 |
| LDL | nmolL-1 | 124.52 | 26.78 | 73.00 | 175.00 |
| SHBG | mmolL-1 | 57.87 | 35.68 | 12.00 | 159.00 |
| TPROT | mmolL-1 | 72.48 | 3.10 | 67.00 | 77.00 |
| ALT | nmolL-1 | 20.57 | 7.09 | 9.00 | 36.00 |
| AST | umolL-1 | 20.30 | 4.43 | 13.00 | 29.00 |
| TRIG | gL-1 | 109.15 | 51.47 | 45.50 | 258.50 |
| URA | mmolL-1 | 29.83 | 7.06 | 18.00 | 44.00 |
| URT | mmolL-1 | 13.99 | 7.00 | 4.75 | 31.20 |
| VITD | umolL-1 | 23.23 | 8.61 | 11.80 | 42.80 |
| BMI | nmolL-1 | 24.94 | 3.03 | 19.58 | 32.02 |
| SBP | kgm-2 | 120.70 | 13.20 | 98.10 | 154.00 |
| DBP | mmHg | 80.13 | 9.08 | 68.40 | 101.80 |

**Table S5. Summary of the medication data from the reference dataset used for quality control.** Summary of the cholesterol-lowering, insulin, and blood pressure medication data from the UK Biobank (Data fields 6177 and 6153). Individuals taking cholesterol-lowering and blood pressure medication were removed from the analysis.

| **Value** | **Count** |
| --- | --- |
| Blood pressure medication | 6584 |
| Do not know | 427 |
| Insulin | 154 |
| None of the above | 42789 |
| Prefer not to answer | 22 |
| Cholesterol-lowering medication | 14512 |

**Table S6. Number of associated variants between datasets and across traits for the reference base datasets.** Number of associated variants from the sequencing and genotype summary statistics at genome-wide significance (P-value < 5.00E-08), Bonferroni corrected (P-value < 1.85E-08), and genomic lambda factors.

| **Measurement** | **Count genome-wide (WES)** | **Count Bonferroni corrected (WES)** | **Genomic lambda factor (WES)** | **Count genome-wide (Imputed array)** | **Count Bonferroni corrected (Imputed array)** | **Genomic lambda factor (Imputed array)** |
| --- | --- | --- | --- | --- | --- | --- |
| ALB | 8 | 7 | 1.117311914 | 19 | 14 | 1.058205324 |
| ALP | 47 | 38 | 1.147275105 | 121 | 94 | 1.067973345 |
| ALT | 10 | 7 | 1.126247802 | 17 | 12 | 1.042291304 |
| APOA | 46 | 33 | 1.142419878 | 77 | 54 | 1.062847763 |
| APOB | 44 | 38 | 1.124745851 | 80 | 56 | 1.044874948 |
| AST | 12 | 11 | 1.119730138 | 37 | 22 | 1.052483153 |
| BMI | 6 | 3 | 1.169194514 | 9 | 7 | 1.098257867 |
| CAL | 13 | 7 | 1.076207994 | 29 | 20 | 1.048352954 |
| CHO | 39 | 31 | 1.105373826 | 55 | 39 | 1.04481717 |
| CREA | 21 | 14 | 1.149820892 | 37 | 23 | 1.07571003 |
| CRP | 27 | 23 | 1.121280783 | 51 | 45 | 1.066552831 |
| DBP | 7 | 2 | 1.13934025 | 6 | 3 | 1.06855549 |
| GGT | 36 | 28 | 1.140087338 | 65 | 40 | 1.070043779 |
| GLUC | 9 | 9 | 1.058987454 | 14 | 7 | 1.039573614 |
| HBA1C | 31 | 21 | 1.158560202 | 75 | 60 | 1.066580762 |
| HDL | 43 | 33 | 1.172124348 | 84 | 61 | 1.0797288 |
| IGF1 | 27 | 20 | 1.173748521 | 42 | 26 | 1.078158913 |
| LDL | 41 | 35 | 1.109065967 | 63 | 52 | 1.036494105 |
| PHOS | 13 | 10 | 1.073625528 | 18 | 15 | 1.055325571 |
| SBP | 7 | 6 | 1.136216308 | 6 | 2 | 1.072183186 |
| SHBG | 34 | 27 | 1.154831542 | 61 | 46 | 1.068552044 |
| TBIL | 36 | 34 | 1.086904416 | 97 | 84 | 1.047415815 |
| TPROT | 10 | 9 | 1.118349065 | 24 | 16 | 1.066954534 |
| TRIG | 17 | 14 | 1.109264377 | 65 | 44 | 1.074355159 |
| URA | 7 | 5 | 1.072879098 | 12 | 9 | 1.047246689 |
| URT | 29 | 23 | 1.102547069 | 128 | 105 | 1.062788444 |
| VITD | 6 | 6 | 1.06451762 | 39 | 30 | 1.029852109 |

**Table S7. Heritability measurements obtained from the individual-level genotype data from the base datasets.** Heritability measurements for the exome-based and imputed-array dataset from the reference dataset (UK Biobank). Measurements were estimated using BOLT-REML*(1)* (SE: standard error).

| **Measurement** | **WES-h**2g | **SE** | **Imputed array-h**2g | **SE** |
| --- | --- | --- | --- | --- |
| CHO | 0.1107 | 0.0044 | 0.1306 | 0.0081 |
| LDL | 0.1253 | 0.0043 | 0.1362 | 0.0081 |
| HDL | 0.1467 | 0.0046 | 0.2476 | 0.0083 |
| TRIG | 0.0977 | 0.0042 | 0.2065 | 0.0082 |
| APOA | 0.1282 | 0.0043 | 0.2038 | 0.0083 |
| APOB | 0.1716 | 0.0045 | 0.1663 | 0.0082 |
| CRP | 0.1231 | 0.0043 | 0.2210 | 0.0083 |
| SBP | 0.0839 | 0.0042 | 0.1735 | 0.0082 |
| DBP | 0.0780 | 0.0041 | 0.1667 | 0.0082 |
| CREA | 0.1083 | 0.0043 | 0.2073 | 0.0083 |
| TPROT | 0.0874 | 0.0042 | 0.1748 | 0.0082 |
| PHOS | 0.0639 | 0.0040 | 0.1347 | 0.0081 |
| URA | 0.0550 | 0.0040 | 0.1154 | 0.0082 |
| URT | 0.1173 | 0.0043 | 0.2892 | 0.0081 |
| ALB | 0.0753 | 0.0041 | 0.1549 | 0.0082 |
| TBIL | 0.2519 | 0.0047 | 0.4288 | 0.0081 |
| GGT | 0.1361 | 0.0044 | 0.2085 | 0.0083 |
| ALT | 0.0716 | 0.0041 | 0.1177 | 0.0080 |
| AST | 0.0816 | 0.0041 | 0.1563 | 0.0081 |
| ALP | 0.1419 | 0.0044 | 0.2582 | 0.0083 |
| VITD | 0.0505 | 0.0040 | 0.1027 | 0.0079 |
| CAL | 0.0639 | 0.0040 | 0.1362 | 0.0080 |
| SHBG | 0.1250 | 0.0044 | 0.2285 | 0.0083 |
| IGF1 | 0.1238 | 0.0043 | 0.2337 | 0.0082 |
| HBA1C | 0.1200 | 0.0043 | 0.2172 | 0.0083 |
| GLUC | 0.0429 | 0.0039 | 0.0817 | 0.0079 |
| BMI | 0.0878 | 0.0042 | 0.2373 | 0.0082 |

**Table S8***.* **Performances of polygenic risk scores of the clinical biomarker measurements obtained from the validation reference dataset***.* Summary results for the exome-based and imputed array-based validations set (UK Biobank; N=22,118).Polygenic risk scores were estimated using the methods with the best performance obtained from the training set (LDpred2-grid and LDpred2-auto). Association analysis using linear regression via Bootstrapping (rep=100). Models were adjusted for age, sex, and the 40 principal components obtained from the population structure analysis. Explained variation of polygenic risk scores were estimated using R2 values (R2 PRS = Full model [PRS + Covariates] – Null model [Covariates]). (SE: standard error, LCI: lower confidence interval, UCI: upper confidence interval).

| **Measurements** | **Null model (covariates only)** | | |  | **PRSs model** | |  |  |
| --- | --- | --- | --- | --- | --- | --- | --- | --- |
|  | **R2** | **SE** | **LCI (95%)** | **UCI (95%)** | **R2** | **SE** | **LCI (95%)** | **UCI (95%)** |
| CHO | 0.027391 | 0.002129 | 0.023213 | 0.031569 | 0.071019 | 0.004556 | 0.062079 | 0.079959 |
| LDL | 0.023084 | 0.001908 | 0.026827 | 0.026827 | 0.08888 | 0.004598 | 0.079857 | 0.097902 |
| HDL | 0.152019 | 0.004244 | 0.143692 | 0.160347 | 0.056543 | 0.006363 | 0.044057 | 0.069029 |
| TRIG | 0.052714 | 0.002867 | 0.047089 | 0.05834 | 0.027911 | 0.00434 | 0.019395 | 0.036428 |
| APOA | 0.145748 | 0.004141 | 0.137622 | 0.153874 | 0.049216 | 0.006144 | 0.037159 | 0.061272 |
| APOB | 0.02971 | 0.002199 | 0.025396 | 0.034025 | 0.122871 | 0.005022 | 0.113017 | 0.132725 |
| CRP | 0.010338 | 0.001228 | 0.007928 | 0.012748 | 0.013641 | 0.002376 | 0.008978 | 0.018303 |
| SBP | 0.157115 | 0.004429 | 0.148423 | 0.165807 | 0.009471 | 0.006328 | -0.00295 | 0.021889 |
| DBP | 0.067408 | 0.003349 | 0.060836 | 0.073979 | 0.010145 | 0.004787 | 0.000752 | 0.019538 |
| CREA | 0.324597 | 0.01514 | 0.294886 | 0.354307 | 0.01696 | 0.021758 | -0.02574 | 0.059656 |
| TPROT | 0.010331 | 0.001287 | 0.007806 | 0.012855 | 0.020991 | 0.002531 | 0.016025 | 0.025958 |
| PHOS | 0.065355 | 0.003108 | 0.059255 | 0.071454 | 0.014722 | 0.00455 | 0.005793 | 0.023651 |
| URA | 0.078645 | 0.003468 | 0.07184 | 0.08545 | 0.007292 | 0.005326 | -0.00316 | 0.017743 |
| URT | 0.282085 | 0.004874 | 0.272522 | 0.291649 | 0.040684 | 0.006973 | 0.027002 | 0.054367 |
| ALB | 0.041843 | 0.002592 | 0.036756 | 0.04693 | 0.015135 | 0.003883 | 0.007623 | 0.022657 |
| TBIL | 0.066724 | 0.003159 | 0.060525 | 0.072922 | 0.225373 | 0.006155 | 0.213295 | 0.23745 |
| GGT | 0.031791 | 0.003186 | 0.025539 | 0.038043 | 0.017859 | 0.005417 | 0.007229 | 0.028488 |
| ALT | 0.058203 | 0.004261 | 0.049842 | 0.066564 | 0.00648 | 0.006484 | -0.00624 | 0.019204 |
| AST | 0.036692 | 0.003874 | 0.02909 | 0.044294 | 0.007507 | 0.005954 | -0.00418 | 0.019192 |
| ALP | 0.045421 | 0.002757 | 0.040012 | 0.05083 | 0.049 | 0.005875 | 0.037473 | 0.060529 |
| VITD | 0.009235 | 0.001186 | 0.006908 | 0.011562 | 0.01993 | 0.002606 | 0.014816 | 0.025044 |
| CAL | 0.016439 | 0.001599 | 0.0133 | 0.019577 | 0.015932 | 0.002823 | 0.010392 | 0.021473 |
| SHBG | 0.151188 | 0.003539 | 0.144243 | 0.158132 | 0.03212 | 0.005245 | 0.021828 | 0.042412 |
| IGF1 | 0.083084 | 0.003795 | 0.007564 | 0.090531 | 0.031484 | 0.005574 | 0.020545 | 0.042423 |
| HBA1C | 0.056652 | 0.003513 | 0.049758 | 0.063547 | 0.018717 | 0.005364 | 0.008192 | 0.029243 |
| GLUC | 0.015756 | 0.001766 | 0.012291 | 0.019222 | 0.005446 | 0.002651 | 2.43E-05 | 0.010649 |
| BMI | 0.008904 | 0.001154 | 0.006639 | 0.011169 | 0.015794 | 0.002305 | 0.011271 | 0.020318 |

**Table S9. Concordance between polygenic risk scores obtained from the exome-based and imputed array-based validation datasets.** Spearman correlation analysis of risk scores from the UK Biobank validation set

| **PRS** | **Spearman correlation value (r)** | **P-value** |
| --- | --- | --- |
| BMI | 0.318321462 | 0 |
| SBP | 0.305622831 | 0 |
| DBP | 0.315091537 | 0 |
| LDL | 0.627071914 | 0 |
| HBA1C | 0.360161357 | 0 |
| VITD | 0.619380319 | 0 |
| ALT | 0.237696439 | 1.1253E-281 |
| ALB | 0.331122799 | 0 |
| ALP | 0.52932953 | 0 |
| APOA | 0.497048539 | 0 |
| APOB | 0.613467496 | 0 |
| AST | 0.346393213 | 0 |
| CAL | 0.409910214 | 0 |
| CHO | 0.601389642 | 0 |
| CREA | 0.417335975 | 0 |
| CRP | 0.573171696 | 0 |
| GGT | 0.517735017 | 0 |
| HDL | 0.506982034 | 0 |
| IGF1 | 0.380565687 | 0 |
| POS | 0.484074762 | 0 |
| SHBG | 0.576771015 | 0 |
| TBIL | 0.815032997 | 0 |
| TPROT | 0.338413544 | 0 |
| TRIG | 0.4443653 | 0 |
| URA | 0.323775445 | 0 |
| URT | 0.564954633 | 0 |

**Table S10. Phecode definition for targeted phenome-wide association analysis.** Phecode mapping for the 17 disease outcomes, and number of cases and controls in the validation set (UK Biobank). Mapping performed with the R package *phewas(2).*

| **Outcome** | **ICD10 code** | **ICD9 code** | **Mapped phecode** | **Cases** | **Controls** | **Group** | **Remarks** |
| --- | --- | --- | --- | --- | --- | --- | --- |
| T2D | E11.19 | 250.2 | 250.2 | 1113 | 20897 | Diabetes |  |
| OBS | E66.9 | 278.1 | 278.1 | 1338 | 20772 | Overweight |  |
| ISC | - | 411,413.9,410.9,414.9 | 411 | 1651 | 20467 | Cardiovascular | Mapped using ICD9 codes |
| ANG | I20.9,I20.8,I20.1 | 413.9 | 411.3 | 818 | 20375 | Cardiovascular |  |
| MYO | I25.2,I21,1,I21.9,I21.4,I21.0,I21.3,I22.1,I21.2,I22.9,I51.0,I24.1,I51.3,I22.0,I23.6 | 410.9 | 411.2 | 756 | 20375 | Cardiovascular |  |
| CAD | I25.1,Z95.1,Z95.5,I24.0 | - | 411.4 | 1251 | 20375 | Cardiovascular | Mapped using ICD10 codes |
| HYP | I10,I27.0,K76.6 | 401.9 | 401.1,415.21,571.81 | 5417 | 16698 | Cardiovascular | Portal hypertension not included |
| BPAIN | M47.9,M47.8,M47.2,M47.1,M40.2,M43.2,M48.9,M53.9 | 721.0,721.1 | 721 | 166 | 21340 | Musculoskeletal |  |
| NPAIN | M54.2 | - | 761 | 80 | 22038 | Musculoskeletal | Mapped using ICD10 codes, low number of cases (N < 200) |
| OA | M16.9,M18.9,M16.3,M16.1,M17.1,M18.0,M18.1,M16.0,M16.7,M17.5,16.6,M18.5,M19.2,M17.4,M15.0,M15.1,M15.2,M13.9,M19.0,M15.4,M15.3 | 715.1,715.9,715.36 | 740 | 1953 | 20165 | Musculoskeletal |  |
| RA | M06.9,M05.9,M06.0,M05.1,M05.2,M06.8,J99.0,M05.3,M06.3 | - | 714.11 | 337 | 21518 | Musculoskeletal | Mapped using ICD10 codes |
| COPD | J44.9,J44.8,J43.2,J43.9,J43.8,J43.1,J42,J41.1,J41.0,J44.0,J44.1 | - | 496,496.1,496.2,496.21 | 1254 | 19480 | Respiratory | Mapped using ICD10 codes |
| ANX | F41.9,F41.2,F41.8,F41.1 | 300 | 300.1,300.11 | 936 | 18494 | Mental disorders |  |
| DEP | F20.4,F32.8,F33.0,F33.1,F33.3,F33.4,F33.8 | - | 296.2 | 0 | 0 | Mental disorders | Mapped using ICD10 codes, No cases in the validation set |
| FLU | J18.9,J10.10,J18.8,J17.2,J16.8,J11.0 | - | 480 | 445 | 20961 | Infectious | Mapped using ICD9 codes |
| PROST | C61, D07.5 | - | 185 | 463 | 7454 | Cancer | Males only, mapped using ICD10 codes |
| BREAST | D05.1,D05.9,D057 | 174.9 | 174.1 | 1068 | 12234 | Cancer | Females only |

**Table S11. Overview of the outcome data used for the two-sample Mendelian randomization analysis***.* The outcome datasets were obtained from the MR-Base Platform*(3)*. (NSNPs: number of SNPs)

| **Disease outcome** | **Outcome dataset** | **Trait** | **Cases** | **Controls** | **NSNPs** | **Ancestry** | **Consortium** | **Remarks** |
| --- | --- | --- | --- | --- | --- | --- | --- | --- |
| ANG | finn-b-I9_ANGINA | Angina pectoros | 18168 | 187840 | 16380426 | European | FinnGen |  |
| ANX | finn-b-KRA_PSY_ANXIETY | Anxiety disorders | 20992 | 198800 | 16380466 | European | FinnGen |  |
| CAD | finn-b-I9_CORIATHER | Coronary atherosclerosis | 23363 | 187840 | 16380447 | European | FinnGen |  |
| COPD | finn-b-J10_COPD | COPD | 6915 | 186723 | 16380382 | European | FinnGen |  |
| HYP | finn-b-I9_HYPTENS | Hypertension | 55917 | 162837 | 16380466 | European | FinnGen |  |
| ISC | finn-b-I9_ISCHEART | Ischemic heart diseases | 30952 | 187840 | 16380466 | European | FinnGen |  |
| MYO | ieu-a-798 | Myorcardial infarction | 43676 | 128199 | 9289492 | Mixed | CARDIoGRAMplusC4D |  |
| OA | finn-b-M13_ARTHROSIS | Arthrosis | 37233 | 147221 | 16380382 | European | FinnGen |  |
| OBS | ieu-a-90 | Obesity class 1 | 32858 | 65839 | 2380428 | European | GIANT |  |
| T2D | finn-b-E4_DM2 | Type 2 diabetes | 32469 | 183185 | 16380440 | European | FinnGen |  |
| PROST | finn-b-C3_PROSTATE_EXALLC | Malignant neoplasm of prostate (all cancers excluded) | 6311 | 74685 | 16377987 | European | FinnGen | Males only |

**Table S12. Summary results of the two-sample Mendelian randomization for the exome-based reference dataset.** Two-sample Mendelian randomization analysis for UK Biobank reference dataset. Main and sensitivity analyses. SNPs at genome-wide significance level (P-value < 5.00E-08) associated with the clinical biomarkers (exposure) were used as genetic instruments. Main analysis: inverse-variance weighted (IVW). Analyses performed using the R package *twosamplemr(4).* Sensitivity analyses: MR-Egger, simple-median, and weighted median (NSNPs: number of SNPs, SE: standard error, FDR: false discovery rate, OR: odds ratio, LCI: lower confidence interval, UCI: upper confidence interval).

| **Exposure** | **Outcome** | **Outcome dataset** | **Method** | **NSNPs** | **Estimate** | **SE** | **OR** | **LCI (OR-95%)** | **UCI (OR-95%)** | **P-value** | **FDR** | **Disease panel** |
| --- | --- | --- | --- | --- | --- | --- | --- | --- | --- | --- | --- | --- |
| SBP | ANG | finn-b-I9_ANGINA | IVW | 4 | 1.31003134 | 0.204434935 | 3.706289867 | 2.482680611 | 5.532964858 | 1.47383E-10 | 5.89531E-10 | Cardiovascular |
| SBP | ANG | finn-b-I9_ANGINA | MR-Egger | 4 | 1.055152325 | 0.652009247 | 2.872412661 | 0.800286253 | 10.30975412 | 0.247006857 | 0.247006857 | Cardiovascular |
| SBP | ANG | finn-b-I9_ANGINA | Simple-median | 4 | 1.313668435 | 0.265134209 | 3.719794538 | 2.212239574 | 6.254689394 | 7.24308E-07 | 1.44862E-06 | Cardiovascular |
| SBP | ANG | finn-b-I9_ANGINA | Weighted-median | 4 | 1.271246898 | 0.270928741 | 3.565295352 | 2.096410435 | 6.063378971 | 2.70307E-06 | 3.60409E-06 | Cardiovascular |
| DBP | ANG | finn-b-I9_ANGINA | IVW | 5 | 1.223166993 | 0.163226696 | 3.397931937 | 2.467591735 | 4.679032305 | 6.6974E-14 | 2.67896E-13 | Cardiovascular |
| DBP | ANG | finn-b-I9_ANGINA | MR-Egger | 5 | 0.815039315 | 0.53226514 | 2.259264494 | 0.795964766 | 6.412690955 | 0.223211663 | 0.223211663 | Cardiovascular |
| DBP | ANG | finn-b-I9_ANGINA | Simple-median | 5 | 1.309543297 | 0.259427729 | 3.704481477 | 2.227912277 | 6.159660394 | 4.46891E-07 | 7.11356E-07 | Cardiovascular |
| DBP | ANG | finn-b-I9_ANGINA | Weighted-median | 5 | 1.095204355 | 0.218435819 | 2.989793602 | 1.948520077 | 4.587515358 | 5.33517E-07 | 7.11356E-07 | Cardiovascular |
| AST | ANX | finn-b-KRA_PSY_ANXIETY | IVW | 10 | -0.020404647 | 0.109010284 | 0.979802119 | 0.791310534 | 1.213192736 | 0.851518769 | 0.975060782 | Mental disorders |
| AST | ANX | finn-b-KRA_PSY_ANXIETY | MR-Egger | 10 | -0.009982523 | 0.30951083 | 0.990067137 | 0.539763742 | 1.816040723 | 0.975060782 | 0.975060782 | Mental disorders |
| AST | ANX | finn-b-KRA_PSY_ANXIETY | Simple-median | 10 | -0.07523685 | 0.130287034 | 0.927523777 | 0.718492914 | 1.197367907 | 0.563622018 | 0.975060782 | Mental disorders |
| AST | ANX | finn-b-KRA_PSY_ANXIETY | Weighted-median | 10 | -0.093357271 | 0.113785419 | 0.910868015 | 0.72878487 | 1.138443696 | 0.411949485 | 0.975060782 | Mental disorders |
| CAD | CAD | finn-b-I9_CORIATHER | IVW | 19 | 0.523571924 | 0.095568106 | 1.688046468 | 1.399700712 | 2.035792977 | 4.28894E-08 | 5.71859E-08 | Cardiovascular |
| CAD | CAD | finn-b-I9_CORIATHER | MR-Egger | 19 | 0.497729116 | 0.12433763 | 1.644981463 | 1.289207077 | 2.098936674 | 0.000921109 | 0.000921109 | Cardiovascular |
| CAD | CAD | finn-b-I9_CORIATHER | Simple-median | 19 | 0.570520527 | 0.102511689 | 1.769187723 | 1.447152188 | 2.162885993 | 2.61523E-08 | 5.23046E-08 | Cardiovascular |
| CAD | CAD | finn-b-I9_CORIATHER | Weighted-median | 19 | 0.473803591 | 0.054171938 | 1.606091505 | 1.444302626 | 1.786003762 | 2.20478E-18 | 8.81911E-18 | Cardiovascular |
| APOB | CAD | finn-b-I9_CORIATHER | IVW | 18 | 0.411817747 | 0.088070614 | 1.509559289 | 1.270231724 | 1.793979165 | 2.92532E-06 | 3.90042E-06 | Cardiovascular |
| APOB | CAD | finn-b-I9_CORIATHER | MR-Egger | 18 | 0.372654068 | 0.110703497 | 1.451582104 | 1.168446645 | 1.803326334 | 0.003930389 | 0.003930389 | Cardiovascular |
| APOB | CAD | finn-b-I9_CORIATHER | Simple-median | 18 | 0.616644504 | 0.109935725 | 1.852700869 | 1.493571873 | 2.298182344 | 2.03338E-08 | 4.06677E-08 | Cardiovascular |
| APOB | CAD | finn-b-I9_CORIATHER | Weighted-median | 18 | 0.349956893 | 0.040459641 | 1.419006379 | 1.310824065 | 1.536116979 | 5.17118E-18 | 2.06847E-17 | Cardiovascular |
| SBP | CAD | finn-b-I9_CORIATHER | IVW | 4 | 1.278517135 | 0.190494213 | 3.591310347 | 2.472298975 | 5.216808379 | 1.92528E-11 | 7.70113E-11 | Cardiovascular |
| SBP | CAD | finn-b-I9_CORIATHER | MR-Egger | 4 | 0.557079917 | 0.552732815 | 1.745567848 | 0.590800784 | 5.157418868 | 0.419634473 | 0.419634473 | Cardiovascular |
| SBP | CAD | finn-b-I9_CORIATHER | Simple-median | 4 | 1.328075046 | 0.263071341 | 3.773772053 | 2.25343387 | 6.31984621 | 4.45652E-07 | 8.91305E-07 | Cardiovascular |
| SBP | CAD | finn-b-I9_CORIATHER | Weighted-median | 4 | 1.144502332 | 0.27260505 | 3.140877853 | 1.840792959 | 5.359165267 | 2.68819E-05 | 3.58426E-05 | Cardiovascular |
| CHO | CAD | finn-b-I9_CORIATHER | IVW | 21 | 0.568439669 | 0.134435904 | 1.76551012 | 1.356550793 | 2.297758404 | 2.3543E-05 | 3.13907E-05 | Cardiovascular |
| CHO | CAD | finn-b-I9_CORIATHER | MR-Egger | 21 | 0.662335146 | 0.182182117 | 1.939315636 | 1.356975325 | 2.771564868 | 0.001760044 | 0.001760044 | Cardiovascular |
| CHO | CAD | finn-b-I9_CORIATHER | Simple-median | 21 | 0.567690311 | 0.110997263 | 1.764187618 | 1.419260095 | 2.19294403 | 3.14651E-07 | 6.29302E-07 | Cardiovascular |
| CHO | CAD | finn-b-I9_CORIATHER | Weighted-median | 21 | 0.550251743 | 0.060724876 | 1.733689407 | 1.539151031 | 1.95281613 | 1.28799E-19 | 5.15198E-19 | Cardiovascular |
| BMI | CAD | finn-b-I9_CORIATHER | IVW | 3 | 0.227216136 | 0.319069782 | 1.255101111 | 0.671554142 | 2.345721213 | 0.476390155 | 0.476390155 | Cardiovascular |
| BMI | CAD | finn-b-I9_CORIATHER | MR-Egger | 3 | 3.829625326 | 1.748738955 | 46.04528304 | 1.494956298 | 1418.214093 | 0.272700818 | 0.38764877 | Cardiovascular |
| BMI | CAD | finn-b-I9_CORIATHER | Simple-median | 3 | 0.331628062 | 0.313890979 | 1.393234556 | 0.753069125 | 2.577588781 | 0.290736578 | 0.38764877 | Cardiovascular |
| BMI | CAD | finn-b-I9_CORIATHER | Weighted-median | 3 | 0.396943249 | 0.27524129 | 1.487271523 | 0.867161817 | 2.550823319 | 0.14925594 | 0.38764877 | Cardiovascular |
| BMI | COPD | finn-b-J10_COPD | IVW | 3 | 0.468555844 | 0.317322577 | 1.597685219 | 0.857789621 | 2.975785667 | 0.139785151 | 0.483069424 | Respiratory |
| BMI | COPD | finn-b-J10_COPD | MR-Egger | 3 | -2.716456677 | 2.575681784 | 0.066108584 | 0.000424417 | 10.29727832 | 0.483069424 | 0.483069424 | Respiratory |
| BMI | COPD | finn-b-J10_COPD | Simple-median | 3 | 0.372917668 | 0.409622662 | 1.451964791 | 0.650546338 | 3.240663476 | 0.362615206 | 0.483069424 | Respiratory |
| BMI | COPD | finn-b-J10_COPD | Weighted-median | 3 | 0.348542128 | 0.386025238 | 1.417000237 | 0.664934102 | 3.019682201 | 0.366579052 | 0.483069424 | Respiratory |
| HDL | COPD | finn-b-J10_COPD | IVW | 23 | -0.002539565 | 0.078201228 | 0.997463657 | 0.855718364 | 1.16268832 | 0.974093456 | 0.974093456 | Respiratory |
| HDL | COPD | finn-b-J10_COPD | MR-Egger | 23 | -0.109360353 | 0.119812352 | 0.896407336 | 0.708792427 | 1.133683263 | 0.371727383 | 0.788205093 | Respiratory |
| HDL | COPD | finn-b-J10_COPD | Simple-median | 23 | 0.081151765 | 0.145064443 | 1.084535478 | 0.816135778 | 1.441202844 | 0.57587599 | 0.788205093 | Respiratory |
| HDL | COPD | finn-b-J10_COPD | Weighted-median | 23 | -0.046975173 | 0.087450215 | 0.954111085 | 0.803821866 | 1.132499627 | 0.59115382 | 0.788205093 | Respiratory |
| TPROT | COPD | finn-b-J10_COPD | IVW | 8 | -0.196293918 | 0.171921745 | 0.821770666 | 0.586688926 | 1.151047852 | 0.253552473 | 0.753900348 | Respiratory |
| TPROT | COPD | finn-b-J10_COPD | MR-Egger | 8 | -0.311861508 | 0.568385626 | 0.732082909 | 0.240292744 | 2.230385228 | 0.603027757 | 0.753900348 | Respiratory |
| TPROT | COPD | finn-b-J10_COPD | Simple-median | 8 | -0.074353791 | 0.237172705 | 0.928343197 | 0.583207469 | 1.47772643 | 0.753900348 | 0.753900348 | Respiratory |
| TPROT | COPD | finn-b-J10_COPD | Weighted-median | 8 | -0.139272397 | 0.218723843 | 0.869991013 | 0.566673982 | 1.335661046 | 0.524287729 | 0.753900348 | Respiratory |
| SBP | HYP | finn-b-I9_HYPTENS | IVW | 4 | 2.099241491 | 0.187020732 | 8.159978149 | 5.655795976 | 11.77292174 | 3.0862E-29 | 1.23448E-28 | Cardiovascular |
| SBP | HYP | finn-b-I9_HYPTENS | MR-Egger | 4 | 2.154227934 | 0.677750484 | 8.621231453 | 2.283791467 | 32.5448417 | 0.08635369 | 0.08635369 | Cardiovascular |
| SBP | HYP | finn-b-I9_HYPTENS | Simple-median | 4 | 2.189958929 | 0.255518436 | 8.934846141 | 5.414837086 | 14.74309832 | 1.02903E-17 | 2.05806E-17 | Cardiovascular |
| SBP | HYP | finn-b-I9_HYPTENS | Weighted-median | 4 | 2.142104755 | 0.257969634 | 8.517345699 | 5.137077164 | 14.12187815 | 1.00911E-16 | 1.34548E-16 | Cardiovascular |
| DBP | HYP | finn-b-I9_HYPTENS | IVW | 5 | 1.785506256 | 0.213661086 | 5.962597783 | 3.922505185 | 9.063741319 | 6.44851E-17 | 1.2897E-16 | Cardiovascular |
| DBP | HYP | finn-b-I9_HYPTENS | MR-Egger | 5 | 1.900289599 | 0.802615629 | 6.687830951 | 1.387027498 | 32.24671673 | 0.098716236 | 0.098716236 | Cardiovascular |
| DBP | HYP | finn-b-I9_HYPTENS | Simple-median | 5 | 1.992626562 | 0.267299353 | 7.334773724 | 4.343670945 | 12.38558497 | 9.00979E-14 | 1.20131E-13 | Cardiovascular |
| DBP | HYP | finn-b-I9_HYPTENS | Weighted-median | 5 | 1.630251351 | 0.190123425 | 5.105157746 | 3.517003814 | 7.410465553 | 9.93453E-18 | 3.97381E-17 | Cardiovascular |
| BMI | HYP | finn-b-I9_HYPTENS | IVW | 3 | 0.028323018 | 0.311387537 | 1.028727929 | 0.558781614 | 1.893908325 | 0.927526396 | 0.987059308 | Cardiovascular |
| BMI | HYP | finn-b-I9_HYPTENS | MR-Egger | 3 | -0.793138823 | 3.481841847 | 0.45242249 | 0.000491746 | 416.2438211 | 0.85741553 | 0.987059308 | Cardiovascular |
| BMI | HYP | finn-b-I9_HYPTENS | Simple-median | 3 | 0.138468081 | 0.266874547 | 1.148513022 | 0.680718765 | 1.937778462 | 0.603864766 | 0.987059308 | Cardiovascular |
| BMI | HYP | finn-b-I9_HYPTENS | Weighted-median | 3 | -0.003350808 | 0.206591809 | 0.996654799 | 0.664798858 | 1.494167413 | 0.987059308 | 0.987059308 | Cardiovascular |
| SBP | ISC | finn-b-I9_ISCHEART | IVW | 4 | 0.999521714 | 0.164718872 | 2.716982022 | 1.967321013 | 3.752306442 | 1.29476E-09 | 5.17903E-09 | Cardiovascular |
| SBP | ISC | finn-b-I9_ISCHEART | MR-Egger | 4 | 0.602580034 | 0.487030154 | 1.826825998 | 0.703280777 | 4.745321266 | 0.341550496 | 0.341550496 | Cardiovascular |
| SBP | ISC | finn-b-I9_ISCHEART | Simple-median | 4 | 1.001135045 | 0.217449178 | 2.721368954 | 1.777014405 | 4.167579599 | 4.14461E-06 | 8.28923E-06 | Cardiovascular |
| SBP | ISC | finn-b-I9_ISCHEART | Weighted-median | 4 | 0.887612329 | 0.210258112 | 2.429322299 | 1.608828751 | 3.668262908 | 2.42642E-05 | 3.23523E-05 | Cardiovascular |
| APOB | ISC | finn-b-I9_ISCHEART | IVW | 18 | 0.369426381 | 0.074074842 | 1.446904404 | 1.251370925 | 1.672991048 | 6.12592E-07 | 1.05127E-06 | Cardiovascular |
| APOB | ISC | finn-b-I9_ISCHEART | MR-Egger | 18 | 0.333582375 | 0.092972547 | 1.395960034 | 1.163410971 | 1.674992297 | 0.002460989 | 0.002460989 | Cardiovascular |
| APOB | ISC | finn-b-I9_ISCHEART | Simple-median | 18 | 0.479555488 | 0.097111325 | 1.615356197 | 1.335381863 | 1.954029566 | 7.88455E-07 | 1.05127E-06 | Cardiovascular |
| APOB | ISC | finn-b-I9_ISCHEART | Weighted-median | 18 | 0.287916544 | 0.036079972 | 1.333645999 | 1.242592346 | 1.431371806 | 1.46387E-15 | 5.85548E-15 | Cardiovascular |
| LDL | MYO | ieu-a-798 | IVW | 19 | 0.356067021 | 0.094793031 | 1.42770323 | 1.185628103 | 1.719203947 | 0.000172473 | 0.000229964 | Cardiovascular |
| LDL | MYO | ieu-a-798 | MR-Egger | 19 | 0.294176165 | 0.124513804 | 1.342020299 | 1.051406833 | 1.712960604 | 0.030331435 | 0.030331435 | Cardiovascular |
| LDL | MYO | ieu-a-798 | Simple-median | 19 | 0.432164928 | 0.107735419 | 1.540589181 | 1.247327804 | 1.902799741 | 6.03715E-05 | 0.000120743 | Cardiovascular |
| LDL | MYO | ieu-a-798 | Weighted-median | 19 | 0.246224067 | 0.045287638 | 1.279186165 | 1.170534283 | 1.397923383 | 5.42175E-08 | 2.1687E-07 | Cardiovascular |
| APOB | MYO | ieu-a-798 | IVW | 18 | 0.264800982 | 0.083533259 | 1.303171596 | 1.106360495 | 1.534993537 | 0.001524355 | 0.002032473 | Cardiovascular |
| APOB | MYO | ieu-a-798 | MR-Egger | 18 | 0.222095066 | 0.105414046 | 1.24869008 | 1.015604027 | 1.535270513 | 0.051261868 | 0.051261868 | Cardiovascular |
| APOB | MYO | ieu-a-798 | Simple-median | 18 | 0.409992313 | 0.091613746 | 1.506806203 | 1.259140533 | 1.803186279 | 7.63302E-06 | 1.5266E-05 | Cardiovascular |
| APOB | MYO | ieu-a-798 | Weighted-median | 18 | 0.181712153 | 0.03256564 | 1.199268938 | 1.125113027 | 1.278312447 | 2.40693E-08 | 9.62774E-08 | Cardiovascular |
| CHO | MYO | ieu-a-798 | IVW | 21 | 0.342680078 | 0.129810367 | 1.408718009 | 1.092263073 | 1.816857567 | 0.008294239 | 0.000229964 | Cardiovascular |
| CHO | MYO | ieu-a-798 | MR-Egger | 21 | 0.424765114 | 0.183393945 | 1.529231183 | 1.067493077 | 2.1906915 | 0.031879513 | 0.030331435 | Cardiovascular |
| CHO | MYO | ieu-a-798 | Simple-median | 21 | 0.302504078 | 0.087231133 | 1.353243195 | 1.14057333 | 1.605567214 | 0.000524649 | 0.000120743 | Cardiovascular |
| CHO | MYO | ieu-a-798 | Weighted-median | 21 | 0.302492353 | 0.056852881 | 1.353227328 | 1.210532936 | 1.512742154 | 1.03416E-07 | 2.1687E-07 | Cardiovascular |
| PHOS | MYO | ieu-a-798 | IVW | 10 | -0.07943234 | 0.135520084 | 0.923640511 | 0.708183736 | 1.204647538 | 0.55778839 | 0.957615207 | Cardiovascular |
| PHOS | MYO | ieu-a-798 | MR-Egger | 10 | 0.439200838 | 0.297395358 | 1.55146685 | 0.866152696 | 2.779012753 | 0.177969518 | 0.711878073 | Cardiovascular |
| PHOS | MYO | ieu-a-798 | Simple-median | 10 | -0.002323516 | 0.131679829 | 0.997679181 | 0.77073091 | 1.291454302 | 0.985921903 | 0.985921903 | Cardiovascular |
| PHOS | MYO | ieu-a-798 | Weighted-median | 10 | 0.042169359 | 0.11686111 | 1.043071118 | 0.829544589 | 1.311559826 | 0.718211405 | 0.957615207 | Cardiovascular |
| URT | MYO | ieu-a-798 | IVW | 15 | 0.118101592 | 0.087938442 | 1.125358433 | 0.947187933 | 1.337043641 | 0.179271002 | 0.239028003 | Cardiovascular |
| URT | MYO | ieu-a-798 | MR-Egger | 15 | 0.021709221 | 0.139061469 | 1.021946581 | 0.778138105 | 1.342145831 | 0.878342608 | 0.878342608 | Cardiovascular |
| URT | MYO | ieu-a-798 | Simple-median | 15 | 0.124799769 | 0.087356561 | 1.132921584 | 0.954641797 | 1.344495203 | 0.153112039 | 0.239028003 | Cardiovascular |
| URT | MYO | ieu-a-798 | Weighted-median | 15 | 0.076421704 | 0.054328428 | 1.079417673 | 0.970385354 | 1.200700844 | 0.159527804 | 0.239028003 | Cardiovascular |
| ALB | MYO | ieu-a-798 | IVW | 6 | -0.075314456 | 0.143817048 | 0.927451797 | 0.699635446 | 1.229450053 | 0.600499461 | 0.600499461 | Cardiovascular |
| ALB | MYO | ieu-a-798 | MR-Egger | 6 | -0.653522564 | 0.355623636 | 0.520210072 | 0.259099042 | 1.044459746 | 0.139974534 | 0.559898136 | Cardiovascular |
| ALB | MYO | ieu-a-798 | Simple-median | 6 | -0.093981966 | 0.139005937 | 0.910299178 | 0.693202161 | 1.195386628 | 0.49897692 | 0.600499461 | Cardiovascular |
| ALB | MYO | ieu-a-798 | Weighted-median | 6 | -0.090735484 | 0.12551434 | 0.91325925 | 0.714091916 | 1.167976335 | 0.469735608 | 0.600499461 | Cardiovascular |
| BMI | OA | finn-b-M19_ARTHROSIS | IVW | 3 | 0.296278732 | 0.167859693 | 1.344844956 | 0.967803444 | 1.868776113 | 0.077557384 | 0.176139364 | Musculoskeletal |
| BMI | OA | finn-b-M19_ARTHROSIS | MR-Egger | 3 | 0.569901626 | 1.365722334 | 1.768093109 | 0.121612667 | 25.70581939 | 0.748330375 | 0.748330375 | Musculoskeletal |
| BMI | OA | finn-b-M19_ARTHROSIS | Simple-median | 3 | 0.307844786 | 0.204431956 | 1.360489806 | 0.911337618 | 2.031006374 | 0.132104523 | 0.176139364 | Musculoskeletal |
| BMI | OA | finn-b-M19_ARTHROSIS | Weighted-median | 3 | 0.308441538 | 0.18563006 | 1.361301923 | 0.946112894 | 1.958691121 | 0.096594483 | 0.176139364 | Musculoskeletal |
| BMI | RA | finn-b-M13_RHEUMA | IVW | 3 | 0.352756414 | 0.334069433 | 1.422984483 | 0.73932352 | 2.738834602 | 0.290996807 | 0.387995743 | Musculoskeletal |
| BMI | RA | finn-b-M13_RHEUMA | MR-Egger | 3 | 3.337190264 | 2.712313342 | 28.1399497 | 0.138215131 | 5729.16122 | 0.434473439 | 0.434473439 | Musculoskeletal |
| BMI | RA | finn-b-M13_RHEUMA | Simple-median | 3 | 0.457595311 | 0.431309082 | 1.580269356 | 0.678568064 | 3.680177968 | 0.288714795 | 0.387995743 | Musculoskeletal |
| BMI | RA | finn-b-M13_RHEUMA | Weighted-median | 3 | 0.503649293 | 0.377524262 | 1.654748929 | 0.789545148 | 3.468065159 | 0.182176142 | 0.387995743 | Musculoskeletal |
| BMI | OBS | ieu-a-90 | IVW | 3 | 2.055417471 | 0.2328114 | 7.81009768 | 4.948611968 | 12.32620908 | 1.05918E-18 | 4.23671E-18 | Overweight |
| BMI | OBS | ieu-a-90 | MR-Egger | 3 | 1.889678165 | 1.853911966 | 6.617238679 | 0.174821594 | 250.4716196 | 0.49391793 | 0.49391793 | Overweight |
| BMI | OBS | ieu-a-90 | Simple-median | 3 | 2.077021222 | 0.359502076 | 7.980660855 | 3.944795651 | 16.14556324 | 7.58213E-09 | 1.01095E-08 | Overweight |
| BMI | OBS | ieu-a-90 | Weighted-median | 3 | 2.052774083 | 0.345780572 | 7.789479826 | 3.955251389 | 15.34061682 | 2.90926E-09 | 5.81852E-09 | Overweight |
| LDL | OBS | ieu-a-90 | IVW | 16 | -0.229536071 | 0.10237999 | 0.794902295 | 0.650378452 | 0.971541502 | 0.024961288 | 0.033281717 | Overweight |
| LDL | OBS | ieu-a-90 | MR-Egger | 16 | -0.169192549 | 0.222279369 | 0.84434631 | 0.546150821 | 1.305354974 | 0.459185119 | 0.459185119 | Overweight |
| LDL | OBS | ieu-a-90 | Simple-median | 16 | -0.296840304 | 0.103529707 | 0.743162683 | 0.606677137 | 0.910353695 | 0.004141221 | 0.008282442 | Overweight |
| LDL | OBS | ieu-a-90 | Weighted-median | 16 | -0.296830684 | 0.095440527 | 0.743169832 | 0.616378463 | 0.896042663 | 0.001870167 | 0.007480668 | Overweight |
| CHO | OBS | ieu-a-90 | IVW | 19 | -0.221263025 | 0.109035432 | 0.801505836 | 0.647282485 | 0.992474878 | 0.042430149 | 0.056573532 | Overweight |
| CHO | OBS | ieu-a-90 | MR-Egger | 19 | -0.33185013 | 0.257490554 | 0.717594861 | 0.433210461 | 1.188665628 | 0.214735658 | 0.214735658 | Overweight |
| CHO | OBS | ieu-a-90 | Simple-median | 19 | -0.273471262 | 0.113246069 | 0.760734198 | 0.609306681 | 0.949795133 | 0.015742076 | 0.031484151 | Overweight |
| CHO | OBS | ieu-a-90 | Weighted-median | 19 | -0.316699082 | 0.104184147 | 0.728549956 | 0.593985714 | 0.893598997 | 0.002367345 | 0.009469378 | Overweight |
| APOB | OBS | ieu-a-90 | IVW | 15 | -0.177980604 | 0.083070509 | 0.836958657 | 0.711201987 | 0.984951963 | 0.032151295 | 0.042868393 | Overweight |
| APOB | OBS | ieu-a-90 | MR-Egger | 15 | -0.122048078 | 0.171008689 | 0.885105813 | 0.633037821 | 1.237544226 | 0.488031738 | 0.488031738 | Overweight |
| APOB | OBS | ieu-a-90 | Simple-median | 15 | -0.240184412 | 0.097147944 | 0.786482811 | 0.650122559 | 0.951444006 | 0.013422535 | 0.02684507 | Overweight |
| APOB | OBS | ieu-a-90 | Weighted-median | 15 | -0.241949011 | 0.077280978 | 0.785096207 | 0.674745478 | 0.913494161 | 0.001743483 | 0.006973932 | Overweight |
| CRP | OBS | ieu-a-90 | IVW | 6 | 0.181618292 | 0.093633935 | 1.199156379 | 0.998097592 | 1.440716852 | 0.052420642 | 0.106752033 | Overweight |
| CRP | OBS | ieu-a-90 | MR-Egger | 6 | 0.388501663 | 0.182708708 | 1.474769435 | 1.030859165 | 2.109837078 | 0.100620858 | 0.134161144 | Overweight |
| CRP | OBS | ieu-a-90 | Simple-median | 6 | 0.116965747 | 0.153484979 | 1.124080926 | 0.832048279 | 1.518611311 | 0.446020371 | 0.446020371 | Overweight |
| CRP | OBS | ieu-a-90 | Weighted-median | 6 | 0.209905266 | 0.10865414 | 1.233561194 | 0.996947819 | 1.526331861 | 0.053376017 | 0.106752033 | Overweight |
| BMI | T2D | finn-b-E4_DM2 | IVW | 3 | 0.03888385 | 0.177392213 | 1.039649721 | 0.734324031 | 1.471927237 | 0.826496553 | 0.826496553 | Diabetes |
| BMI | T2D | finn-b-E4_DM2 | MR-Egger | 3 | -0.699909252 | 1.439009801 | 0.49663037 | 0.029588531 | 8.335720527 | 0.711805781 | 0.826496553 | Diabetes |
| BMI | T2D | finn-b-E4_DM2 | Simple-median | 3 | 0.171436672 | 0.227239033 | 1.18700897 | 0.7603687 | 1.853035632 | 0.450589138 | 0.826496553 | Diabetes |
| BMI | T2D | finn-b-E4_DM2 | Weighted-median | 3 | 0.092646969 | 0.207367023 | 1.097074366 | 0.730670703 | 1.647215578 | 0.655035547 | 0.826496553 | Diabetes |
| HBA1C | T2D | finn-b-E4_DM2 | IVW | 14 | 0.284301636 | 0.164368824 | 1.328833694 | 0.962846517 | 1.8339361 | 0.083691632 | 0.29889899 | Diabetes |
| HBA1C | T2D | finn-b-E4_DM2 | MR-Egger | 14 | 0.120791837 | 0.473138634 | 1.128389999 | 0.446391064 | 2.852350983 | 0.802815322 | 0.802815322 | Diabetes |
| HBA1C | T2D | finn-b-E4_DM2 | Simple-median | 14 | 0.148210372 | 0.102818289 | 1.159756851 | 0.948082766 | 1.418690438 | 0.149449495 | 0.29889899 | Diabetes |
| HBA1C | T2D | finn-b-E4_DM2 | Weighted-median | 14 | 0.084175116 | 0.099639384 | 1.087819372 | 0.894833083 | 1.322426504 | 0.398223837 | 0.530965116 | Diabetes |
| CRP | T2D | finn-b-E4_DM2 | IVW | 5 | 0.239015458 | 0.13903929 | 1.269998168 | 0.967053413 | 1.667845153 | 0.085605311 | 0.171210621 | Diabetes |
| CRP | T2D | finn-b-E4_DM2 | MR-Egger | 5 | 0.430036972 | 0.27365749 | 1.537314361 | 0.899126352 | 2.62847979 | 0.214118012 | 0.285490683 | Diabetes |
| CRP | T2D | finn-b-E4_DM2 | Simple-median | 5 | 0.034157561 | 0.149515778 | 1.034747629 | 0.771905331 | 1.387090636 | 0.819292881 | 0.819292881 | Diabetes |
| CRP | T2D | finn-b-E4_DM2 | Weighted-median | 5 | 0.297214234 | 0.075432897 | 1.346103649 | 1.161097589 | 1.560588062 | 8.14428E-05 | 0.000325771 | Diabetes |

**Table S13. Heterogeneity test for the IVW and MR-Egger methods for WES-based MR analysis.** Cochran’s Q test statistics for heterogeneity in the two-sample Mendelian randomization analysis for the WES-based data (UK Biobank) Analyses performed using the R package *twosamplemr(4).*(Q: Q-value, DF: degrees 0f freedom).

| **Exposure** | **Outcome** | **Outcome dataset** | **Method** | **Q** | **DF** | **P-value** | **Group** |
| --- | --- | --- | --- | --- | --- | --- | --- |
| SBP | ANG | finn-b-I9_ANGINA | MR-Egger | 2.337429 | 2 | 0.310766 | Cardiovascular |
| SBP | ANG | finn-b-I9_ANGINA | IVW | 2.539207 | 3 | 0.468247 | Cardiovascular |
| DBP | ANG | finn-b-I9_ANGINA | MR-Egger | 2.008885 | 3 | 0.570565 | Cardiovascular |
| DBP | ANG | finn-b-I9_ANGINA | IVW | 2.657861 | 4 | 0.616608 | Cardiovascular |
| AST | ANX | finn-b-KRA_PSY_ANXIETY | MR-Egger | 15.56481 | 8 | 0.04905 | Mental |
| AST | ANX | finn-b-KRA_PSY_ANXIETY | IVW | 15.56737 | 9 | 0.076484 | Mental |
| LDL | CAD | finn-b-I9_CORATHER | MR-Egger | 109.8656 | 17 | 1.28E-15 | Cardiovascular |
| LDL | CAD | finn-b-I9_CORATHER | IVW | 110.6029 | 18 | 2.43E-15 | Cardiovascular |
| APOB | CAD | finn-b-I9_CORATHER | MR-Egger | 126.3145 | 16 | 3.32E-19 | Cardiovascular |
| APOB | CAD | finn-b-I9_CORATHER | IVW | 129.1989 | 17 | 2.67E-19 | Cardiovascular |
| SBP | CAD | finn-b-I9_CORIATHER | MR-Egger | 1.183447 | 2 | 0.553373 | Cardiovascular |
| SBP | CAD | finn-b-I9_CORIATHER | IVW | 3.107679 | 3 | 0.375319 | Cardiovascular |
| CHO | CAD | finn-b-I9_CORIATHER | MR-Egger | 176.791 | 19 | 1.32E-27 | Cardiovascular |
| CHO | CAD | finn-b-I9_CORIATHER | IVW | 182.354 | 20 | 3.36E-28 | Cardiovascular |
| BMI | CAD | finn-b-I9_CORIATHER | MR-Egger | 0.099879 | 1 | 0.751975 | Cardiovascular |
| BMI | CAD | finn-b-I9_CORIATHER | IVW | 4.408568 | 2 | 0.110329 | Cardiovascular |
| BMI | COPD | finn-b-J10_COPD | MR-Egger | 0.381582 | 1 | 0.536758 | Respiratory |
| BMI | COPD | finn-b-J10_COPD | IVW | 1.934255 | 2 | 0.380173 | Respiratory |
| HDL | COPD | finn-b-J10_COPD | MR-Egger | 26.2426 | 21 | 0.197349 | Respiratory |
| HDL | COPD | finn-b-J10_COPD | IVW | 27.95231 | 22 | 0.177267 | Respiratory |
| TPROT | COPD | finn-b-J10_COPD | MR-Egger | 5.571674 | 6 | 0.472837 | Respiratory |
| TPROT | COPD | finn-b-J10_COPD | IVW | 5.617179 | 7 | 0.58509 | Respiratory |
| SBP | HYP | finn-b-I9_HYPTENS | MR-Egger | 5.626212 | 2 | 0.060018 | Cardiovascular |
| SBP | HYP | finn-b-I9_HYPTENS | IVW | 5.647107 | 3 | 0.1301 | Cardiovascular |
| DBP | HYP | finn-b-I9_HYPTENS | MR-Egger | 15.36731 | 3 | 0.001528 | Cardiovascular |
| DBP | HYP | finn-b-I9_HYPTENS | IVW | 15.48291 | 4 | 0.003798 | Cardiovascular |
| BMI | HYP | finn-b-I9_HYPTENS | MR-Egger | 7.477528 | 1 | 0.006247 | Cardiovascular |
| BMI | HYP | finn-b-I9_HYPTENS | IVW | 7.900139 | 2 | 0.019253 | Cardiovascular |
| SBP | ISC | finn-b-I9_ISCHEART | MR-Egger | 0.757516 | 2 | 0.684711 | Cardiovascular |
| SBP | ISC | finn-b-I9_ISCHEART | IVW | 1.507579 | 3 | 0.680522 | Cardiovascular |
| APOB | ISC | finn-b-I9_ISCHEART | MR-Egger | 114.7292 | 16 | 5.63E-17 | Cardiovascular |
| APOB | ISC | finn-b-I9_ISCHEART | IVW | 117.8338 | 17 | 3.98E-17 | Cardiovascular |
| LDL | MYO | ieu-a-798 | MR-Egger | 123.7546 | 17 | 2.96E-18 | Cardiovascular |
| LDL | MYO | ieu-a-798 | IVW | 128.1688 | 18 | 1.19E-18 | Cardiovascular |
| APOB | MYO | ieu-a-798 | MR-Egger | 140.8065 | 16 | 5.01E-22 | Cardiovascular |
| APOB | MYO | ieu-a-798 | IVW | 144.9132 | 17 | 2.41E-22 | Cardiovascular |
| CHO | MYO | ieu-a-798 | MR-Egger | 195.079 | 19 | 3.23E-31 | Cardiovascular |
| CHO | MYO | ieu-a-798 | IVW | 199.33 | 20 | 1.53E-31 | Cardiovascular |
| PHOS | MYO | ieu-a-798 | MR-Egger | 18.23566 | 8 | 0.019527 | Cardiovascular |
| PHOS | MYO | ieu-a-798 | IVW | 26.49618 | 9 | 0.001694 | Cardiovascular |
| URT | MYO | ieu-a-798 | MR-Egger | 55.26251 | 13 | 3.63E-07 | Cardiovascular |
| URT | MYO | ieu-a-798 | IVW | 58.69785 | 14 | 1.98E-07 | Cardiovascular |
| ALB | MYO | ieu-a-798 | MR-Egger | 6.245951 | 4 | 0.181518 | Cardiovascular |
| ALB | MYO | ieu-a-798 | IVW | 10.92038 | 5 | 0.052982 | Cardiovascular |
| BMI | OA | finn-b-M19_ARTHROSIS | MR-Egger | 0.005844 | 1 | 0.939067 | Musculoskeletal |
| BMI | OA | finn-b-M19_ARTHROSIS | IVW | 0.046599 | 2 | 0.97697 | Musculoskeletal |
| BMI | RA | finn-b-M13_RHEUMA | MR-Egger | 0.018666 | 1 | 0.891328 | Musculoskeletal |
| BMI | RA | finn-b-M13_RHEUMA | IVW | 1.248037 | 2 | 0.535787 | Musculoskeletal |
| BMI | OBS | ieu-a-90 | MR-Egger | 0.133987 | 1 | 0.714333 | Overweight |
| BMI | OBS | ieu-a-90 | IVW | 0.142107 | 2 | 0.931412 | Overweight |
| LDL | OBS | ieu-a-90 | MR-Egger | 35.47135 | 14 | 0.001251 | Overweight |
| LDL | OBS | ieu-a-90 | IVW | 35.71252 | 15 | 0.001945 | Overweight |
| CHO | OBS | ieu-a-90 | MR-Egger | 45.13875 | 17 | 0.000232 | Overweight |
| CHO | OBS | ieu-a-90 | IVW | 45.74144 | 18 | 0.000324 | Overweight |
| APOB | OBS | ieu-a-90 | MR-Egger | 29.34355 | 13 | 0.005849 | Overweight |
| APOB | OBS | ieu-a-90 | IVW | 29.6661 | 14 | 0.008482 | Overweight |
| CRP | OBS | ieu-a-90 | MR-Egger | 0.644345 | 4 | 0.958011 | Overweight |
| CRP | OBS | ieu-a-90 | IVW | 2.38314 | 5 | 0.793982 | Overweight |
| BMI | T2D | finn-b-E4_DM2 | MR-Egger | 0.693726 | 1 | 0.4049 | Diabetes |
| BMI | T2D | finn-b-E4_DM2 | IVW | 0.961377 | 2 | 0.618357 | Diabetes |
| HBA1C | T2D | finn-b-E4_DM2 | MR-Egger | 94.06815 | 12 | 8.01E-15 | Diabetes |
| HBA1C | T2D | finn-b-E4_DM2 | IVW | 95.14334 | 13 | 1.44E-14 | Diabetes |
| CRP | T2D | finn-b-E4_DM2 | MR-Egger | 16.01166 | 3 | 0.001128 | Diabetes |
| CRP | T2D | finn-b-E4_DM2 | IVW | 19.62746 | 4 | 0.000591 | Diabetes |

**Table S14. Egger intercept test for the exome-based two-sample Mendelian randomization analyses.** Egger intercept test for horizontal pleiotropy (UK Biobank exome-based analysis).

| **Exposure** | **Outcome** | **Outcome dataset** | **Intercept** | **SE** | **P-value** | **Disease group** |
| --- | --- | --- | --- | --- | --- | --- |
| SBP | ANG | finn-b-I9_ANGINA | 0.01021492 | 0.024584 | 0.7181042 | Cardiovascular |
| DBP | ANG | finn-b-I9_ANGINA | 0.01804381 | 0.022398 | 0.4794144 | Cardiovascular |
| AST | ANX | finn-b-KRA_PSY_ANXIETY | -0.0005675 | 0.015633 | 0.9719322 | Mental disorders |
| LDL | CAD | finn-b-I9_CORATHER | 0.00395084 | 0.011697 | 0.7396717 | Cardiovascular |
| APOB | CAD | finn-b-I9_CORATHER | 0.00758949 | 0.012556 | 0.5540202 | Cardiovascular |
| SBP | CAD | finn-b-I9_CORIATHER | 0.0288947 | 0.02083 | 0.2997528 | Cardiovascular |
| CHO | CAD | finn-b-I9_CORATHER | -0.0109998 | 0.014226 | 0.4489081 | Cardiovascular |
| BMI | CAD | finn-b-I9_CORATHER | -0.1320528 | 0.063617 | 0.2858082 | Cardiovascular |
| BMI | COPD | finn-b-J10_COPD | 0.11665982 | 0.093623 | 0.4305333 | Respiratory |
| HDL | COPD | finn-b-J10_COPD | 0.01075882 | 0.009198 | 0.2552347 | Respiratory |
| TPROT | COPD | finn-b-J10_COPD | 0.00553372 | 0.025941 | 0.8381423 | Respiratory |
| SBP | HYP | finn-b-I9_HYPTENS | -0.0021964 | 0.025485 | 0.9391727 | Cardiovascular |
| DBP | HYP | finn-b-I9_HYPTENS | -0.0050665 | 0.033725 | 0.8901157 | Cardiovascular |
| BMI | HYP | finn-b-I9_HYPTENS | 0.03009497 | 0.126591 | 0.8514122 | Cardiovascular |
| SBP | ISC | finn-b-I9_ISCHEART | 0.0158742 | 0.018329 | 0.4777512 | Cardiovascular |
| APOB | ISC | finn-b-I9_ISCHEART | 0.0069361 | 0.010541 | 0.5198965 | Cardiovascular |
| LDL | MYO | ieu-a-798 | 0.00850016 | 0.010916 | 0.4468625 | Cardiovascular |
| APOB | MYO | ieu-a-798 | 0.00771869 | 0.011299 | 0.5043065 | Cardiovascular |
| CHO | MYO | ieu-a-798 | -0.0084526 | 0.013136 | 0.5276211 | Cardiovascular |
| PHOS | MYO | ieu-a-798 | -0.0352163 | 0.018499 | 0.0934405 | Cardiovascular |
| URT | MYO | ieu-a-798 | 0.00878529 | 0.009773 | 0.3850214 | Cardiovascular |
| ALB | MYO | ieu-a-798 | 0.0340259 | 0.019666 | 0.1586464 | Cardiovascular |
| BMI | OA | finn-b-M19_ARTHROSIS | -0.0100309 | 0.049687 | 0.8731831 | Musculoskeletal |
| BMI | RA | finn-b-M13_RHEUMA | -0.1093181 | 0.098594 | 0.4671923 | Musculoskeletal |
| BMI | OBS | ieu-a-90 | 0.0060075 | 0.066666 | 0.9427867 | Overweight |
| LDL | OBS | ieu-a-90 | -0.003783 | 0.012261 | 0.7622238 | Overweight |
| CHO | OBS | ieu-a-90 | 0.00591084 | 0.012407 | 0.639838 | Overweight |
| APOB | OBS | ieu-a-90 | -0.0041966 | 0.011102 | 0.7115196 | Overweight |
| CRP | OBS | ieu-a-90 | -0.018135 | 0.013753 | 0.2577221 | Overweight |
| BMI | T2D | finn-b-E4_DM2 | 0.02705739 | 0.0523 | 0.696058 | Diabetes |
| HBA1C | T2D | finn-b-E4_DM2 | 0.00873715 | 0.023592 | 0.7175757 | Diabetes |
| CRP | T2D | finn-b-E4_DM2 | -0.0192303 | 0.023364 | 0.4707884 | Diabetes |

**Table S15. Summary results of the two-sample Mendelian randomization for the imputed array based reference dataset.** Two-sample Mendelian randomization analysis for UK Biobank reference dataset. Main and sensitivity analyses. SNPs at genome-wide significance level (P-value < 5.00E-08) associated with the clinical biomarkers (exposure) were used as genetic instruments. Main analysis: inverse-variance weighted (IVW). Analyses performed using the R package *twosamplemr(4).* Sensitivity analyses: MR-Egger, simple-median, and weighted median (NSNPs: number of SNPs, SE: standard error, FDR: false discovery rate, OR: odds ratio, LCI: lower confidence interval, UCI: upper confidence interval).

| **Exposure** | **Outcome** | **Outcome dataset** | **Method** | **NSNPs** | **Estimate** | **SE** | **OR** | **LCI (OR-95%)** | **UCI (OR-95%)** | **P-value** | **FDR** | **Disease panel** |
| --- | --- | --- | --- | --- | --- | --- | --- | --- | --- | --- | --- | --- |
| BMI | ANG | finn-b-I9_ANGINA | IVW | 7 | 0.335818916 | 0.154073723 | 1.39908565 | 1.034413312 | 1.892319668 | 0.029287207 | 0.11714883 | Cardiovascular |
| BMI | ANG | finn-b-I9_ANGINA | MR-Egger | 7 | -0.249222364 | 0.621232081 | 0.779406642 | 0.230653835 | 2.633707408 | 0.70486216 | 0.70486216 | Cardiovascular |
| BMI | ANG | finn-b-I9_ANGINA | Simple-median | 7 | 0.252838412 | 0.19971678 | 1.287675187 | 0.870570551 | 1.904621499 | 0.205518516 | 0.274024688 | Cardiovascular |
| BMI | ANG | finn-b-I9_ANGINA | Weighted-median | 7 | 0.301824938 | 0.193948491 | 1.352324466 | 0.924673937 | 1.977758199 | 0.119657727 | 0.239315453 | Cardiovascular |
| GGT | ANG | finn-b-I9_ANGINA | IVW | 27 | 0.052363306 | 0.082672311 | 1.05375851 | 0.896125846 | 1.239119485 | 0.526483014 | 0.526483014 | Cardiovascular |
| GGT | ANG | finn-b-I9_ANGINA | MR-Egger | 27 | 0.154356768 | 0.139326949 | 1.166907128 | 0.888052823 | 1.533323481 | 0.278461497 | 0.526483014 | Cardiovascular |
| GGT | ANG | finn-b-I9_ANGINA | Simple-median | 27 | 0.09173821 | 0.110307621 | 1.096077842 | 0.882969406 | 1.36062091 | 0.405602043 | 0.526483014 | Cardiovascular |
| GGT | ANG | finn-b-I9_ANGINA | Weighted-median | 27 | 0.138027683 | 0.077535342 | 1.14800733 | 0.986155147 | 1.336423415 | 0.075044781 | 0.300179125 | Cardiovascular |
| SHBG | ANG | finn-b-I9_ANGINA | IVW | 23 | -0.123014511 | 0.081494458 | 0.884250831 | 0.753712979 | 1.037396933 | 0.131175358 | 0.52470143 | Cardiovascular |
| SHBG | ANG | finn-b-I9_ANGINA | MR-Egger | 23 | -0.009384518 | 0.127759255 | 0.990659379 | 0.771211474 | 1.272551094 | 0.942139458 | 0.942139458 | Cardiovascular |
| SHBG | ANG | finn-b-I9_ANGINA | Simple-median | 23 | -0.112545742 | 0.128208417 | 0.893556473 | 0.695006391 | 1.148828531 | 0.380033664 | 0.655247486 | Cardiovascular |
| SHBG | ANG | finn-b-I9_ANGINA | Weighted-median | 23 | -0.046751617 | 0.067950239 | 0.954324406 | 0.835325269 | 1.090275975 | 0.491435614 | 0.655247486 | Cardiovascular |
| BMI | CAD | finn-b-I9_CORIATHER | IVW | 7 | 0.421954986 | 0.140783989 | 1.52493988 | 1.157217443 | 2.009511394 | 0.002724896 | 0.006874623 | Cardiovascular |
| BMI | CAD | finn-b-I9_CORIATHER | MR-Egger | 7 | 0.018262852 | 0.567817175 | 1.018430638 | 0.334653767 | 3.099325526 | 0.975586273 | 0.975586273 | Cardiovascular |
| BMI | CAD | finn-b-I9_CORIATHER | Simple-median | 7 | 0.496774514 | 0.183627468 | 1.643411911 | 1.146672967 | 2.355338257 | 0.006823476 | 0.009097967 | Cardiovascular |
| BMI | CAD | finn-b-I9_CORIATHER | Weighted-median | 7 | 0.503922484 | 0.172242581 | 1.655201053 | 1.180959242 | 2.319885758 | 0.003437312 | 0.006874623 | Cardiovascular |
| CHO | CAD | finn-b-I9_CORIATHER | IVW | 20 | 0.757666656 | 0.175021202 | 2.133292702 | 1.513803108 | 3.006294364 | 1.49788E-05 | 1.99718E-05 | Cardiovascular |
| CHO | CAD | finn-b-I9_CORIATHER | MR-Egger | 20 | 0.69422135 | 0.288976369 | 2.002149493 | 1.136357154 | 3.527590404 | 0.027295076 | 0.027295076 | Cardiovascular |
| CHO | CAD | finn-b-I9_CORIATHER | Simple-median | 20 | 0.760512947 | 0.097952533 | 2.139373325 | 1.765662516 | 2.59218179 | 8.22291E-15 | 1.64458E-14 | Cardiovascular |
| CHO | CAD | finn-b-I9_CORIATHER | Weighted-median | 20 | 0.706596506 | 0.089380709 | 2.027080348 | 1.701330031 | 2.415201437 | 2.66925E-15 | 1.0677E-14 | Cardiovascular |
| GGT | CAD | finn-b-I9_CORIATHER | IVW | 27 | 0.108720978 | 0.088630933 | 1.114851239 | 0.937071539 | 1.326359016 | 0.219946345 | 0.293261794 | Cardiovascular |
| GGT | CAD | finn-b-I9_CORIATHER | MR-Egger | 27 | 0.278382814 | 0.145755137 | 1.320991795 | 0.992729305 | 1.757799746 | 0.067679148 | 0.135358296 | Cardiovascular |
| GGT | CAD | finn-b-I9_CORIATHER | Simple-median | 27 | -0.053513956 | 0.115594767 | 0.947892712 | 0.755723508 | 1.188927676 | 0.643404187 | 0.643404187 | Cardiovascular |
| GGT | CAD | finn-b-I9_CORIATHER | Weighted-median | 27 | 0.16484576 | 0.070651491 | 1.179211223 | 1.02671957 | 1.35435142 | 0.019636389 | 0.078545555 | Cardiovascular |
| APOB | CAD | finn-b-I9_CORIATHER | IVW | 23 | 0.665495573 | 0.143420301 | 1.945454397 | 1.46872075 | 2.576931532 | 3.48111E-06 | 4.64148E-06 | Cardiovascular |
| APOB | CAD | finn-b-I9_CORIATHER | MR-Egger | 23 | 0.535646958 | 0.2209961 | 1.708553247 | 1.107931322 | 2.634779016 | 0.024475125 | 0.024475125 | Cardiovascular |
| APOB | CAD | finn-b-I9_CORIATHER | Simple-median | 23 | 0.734334785 | 0.105745063 | 2.084095161 | 1.69396928 | 2.564068127 | 3.80104E-12 | 7.60207E-12 | Cardiovascular |
| APOB | CAD | finn-b-I9_CORIATHER | Weighted-median | 23 | 0.663912139 | 0.080758268 | 1.942376336 | 1.658023009 | 2.275496667 | 2.01846E-16 | 8.07385E-16 | Cardiovascular |
| LDL | CAD | finn-b-I9_CORIATHER | IVW | 20 | 0.68043528 | 0.157174593 | 1.974737109 | 1.451174282 | 2.687193879 | 1.49673E-05 | 1.99565E-05 | Cardiovascular |
| LDL | CAD | finn-b-I9_CORIATHER | MR-Egger | 20 | 0.531810119 | 0.252696431 | 1.702010364 | 1.037200353 | 2.792940893 | 0.049646548 | 0.049646548 | Cardiovascular |
| LDL | CAD | finn-b-I9_CORIATHER | Simple-median | 20 | 0.769044057 | 0.091019301 | 2.157702628 | 1.805154578 | 2.579103578 | 2.93201E-17 | 1.17281E-16 | Cardiovascular |
| LDL | CAD | finn-b-I9_CORIATHER | Weighted-median | 20 | 0.626278665 | 0.079403196 | 1.870636347 | 1.601031969 | 2.185640518 | 3.08737E-15 | 6.17474E-15 | Cardiovascular |
| TRIG | CAD | finn-b-I9_CORIATHER | IVW | 19 | 0.351515677 | 0.086260205 | 1.421220027 | 1.200148952 | 1.683013065 | 4.60021E-05 | 6.13361E-05 | Cardiovascular |
| TRIG | CAD | finn-b-I9_CORIATHER | MR-Egger | 19 | 0.235703919 | 0.162547051 | 1.265799475 | 0.920453956 | 1.74071533 | 0.165239666 | 0.165239666 | Cardiovascular |
| TRIG | CAD | finn-b-I9_CORIATHER | Simple-median | 19 | 0.448523669 | 0.096628157 | 1.565998546 | 1.295805465 | 1.892530564 | 3.45472E-06 | 6.90944E-06 | Cardiovascular |
| TRIG | CAD | finn-b-I9_CORIATHER | Weighted-median | 19 | 0.422214536 | 0.082616498 | 1.525335729 | 1.297301321 | 1.793453108 | 3.21247E-07 | 1.28499E-06 | Cardiovascular |
| HDL | CAD | finn-b-I9_CORIATHER | IVW | 20 | -0.268354119 | 0.124531107 | 0.764636961 | 0.599035098 | 0.976019074 | 0.03116838 | 0.04155784 | Cardiovascular |
| HDL | CAD | finn-b-I9_CORIATHER | MR-Egger | 20 | -0.206487452 | 0.24489029 | 0.813436469 | 0.503348543 | 1.314554094 | 0.410191113 | 0.410191113 | Cardiovascular |
| HDL | CAD | finn-b-I9_CORIATHER | Simple-median | 20 | -0.297599236 | 0.124464467 | 0.742598887 | 0.581845931 | 0.947764826 | 0.016800826 | 0.033601653 | Cardiovascular |
| HDL | CAD | finn-b-I9_CORIATHER | Weighted-median | 20 | -0.345083311 | 0.111981894 | 0.708161353 | 0.568605832 | 0.881968623 | 0.002058919 | 0.008235675 | Cardiovascular |
| DBP | CAD | finn-b-I9_CORIATHER | IVW | 4 | 0.956477737 | 0.45472202 | 2.602513573 | 1.067396576 | 6.345417483 | 0.035427853 | 0.047237137 | Cardiovascular |
| DBP | CAD | finn-b-I9_CORIATHER | MR-Egger | 4 | 8.173001893 | 2.396485501 | 3543.966621 | 32.32659643 | 388525.2639 | 0.076271348 | 0.076271348 | Cardiovascular |
| DBP | CAD | finn-b-I9_CORIATHER | Simple-median | 4 | 0.913872314 | 0.304553449 | 2.493961259 | 1.372930564 | 4.530340373 | 0.002693633 | 0.005387267 | Cardiovascular |
| DBP | CAD | finn-b-I9_CORIATHER | Weighted-median | 4 | 1.046142978 | 0.273326963 | 2.846650323 | 1.665994313 | 4.86401304 | 0.000129482 | 0.000517928 | Cardiovascular |
| BMI | COPD | finn-b-J10_COPD | IVW | 7 | 0.496699727 | 0.20776221 | 1.643289009 | 1.093611799 | 2.469248018 | 0.016815712 | 0.067262846 | Respiratory |
| BMI | COPD | finn-b-J10_COPD | MR-Egger | 7 | 0.012381249 | 0.838938539 | 1.012458213 | 0.195550174 | 5.241987838 | 0.988795842 | 0.988795842 | Respiratory |
| BMI | COPD | finn-b-J10_COPD | Simple-median | 7 | 0.440646959 | 0.300198779 | 1.553712081 | 0.862653092 | 2.798368491 | 0.142144808 | 0.202301299 | Respiratory |
| BMI | COPD | finn-b-J10_COPD | Weighted-median | 7 | 0.383292352 | 0.267389347 | 1.467106879 | 0.868671047 | 2.477810906 | 0.151725975 | 0.202301299 | Respiratory |
| HDL | COPD | finn-b-J10_COPD | IVW | 20 | 0.064862116 | 0.121812404 | 1.06701189 | 0.840389171 | 1.354746602 | 0.594396732 | 0.792528976 | Respiratory |
| HDL | COPD | finn-b-J10_COPD | MR-Egger | 20 | 0.280295365 | 0.232126987 | 1.323520677 | 0.839731123 | 2.086033176 | 0.242864155 | 0.792528976 | Respiratory |
| HDL | COPD | finn-b-J10_COPD | Simple-median | 20 | -0.089892578 | 0.156094596 | 0.914029367 | 0.673115741 | 1.241167949 | 0.564692736 | 0.792528976 | Respiratory |
| HDL | COPD | finn-b-J10_COPD | Weighted-median | 20 | 0.020182831 | 0.150497311 | 1.020387882 | 0.759730208 | 1.370475227 | 0.893317499 | 0.893317499 | Respiratory |
| APOA | COPD | finn-b-J10_COPD | IVW | 23 | 0.062919592 | 0.121922894 | 1.064941206 | 0.838576657 | 1.352410376 | 0.605812142 | 0.911778491 | Respiratory |
| APOA | COPD | finn-b-J10_COPD | MR-Egger | 23 | 0.314298691 | 0.274440127 | 1.369298673 | 0.799631759 | 2.344802884 | 0.264996013 | 0.911778491 | Respiratory |
| APOA | COPD | finn-b-J10_COPD | Simple-median | 23 | -0.017258549 | 0.15576936 | 0.982889527 | 0.72428777 | 1.333823188 | 0.911778491 | 0.911778491 | Respiratory |
| APOA | COPD | finn-b-J10_COPD | Weighted-median | 23 | -0.020681436 | 0.152148859 | 0.979530958 | 0.726953183 | 1.319866148 | 0.891877442 | 0.911778491 | Respiratory |
| ALB | COPD | finn-b-J10_COPD | IVW | 12 | 0.308369791 | 0.153293359 | 1.361204257 | 1.007946212 | 1.83826975 | 0.044258768 | 0.167116446 | Respiratory |
| ALB | COPD | finn-b-J10_COPD | MR-Egger | 12 | -0.134706532 | 0.329678174 | 0.873972357 | 0.458004737 | 1.667728781 | 0.691445681 | 0.691445681 | Respiratory |
| ALB | COPD | finn-b-J10_COPD | Simple-median | 12 | 0.386939748 | 0.22361245 | 1.472467769 | 0.94995501 | 2.282383176 | 0.083558223 | 0.167116446 | Respiratory |
| ALB | COPD | finn-b-J10_COPD | Weighted-median | 12 | 0.253484101 | 0.219675479 | 1.288506894 | 0.837712901 | 1.981884263 | 0.248540113 | 0.331386817 | Respiratory |
| HBA1C | COPD | finn-b-J10_COPD | IVW | 23 | 0.073192501 | 0.095776272 | 1.075937636 | 0.891786084 | 1.298116015 | 0.444746361 | 0.477630079 | Respiratory |
| HBA1C | COPD | finn-b-J10_COPD | MR-Egger | 23 | 0.389116108 | 0.273269276 | 1.475675879 | 0.863732925 | 2.521172039 | 0.169156959 | 0.338313919 | Respiratory |
| HBA1C | COPD | finn-b-J10_COPD | Simple-median | 23 | -0.108879801 | 0.153326042 | 0.89683821 | 0.664049328 | 1.211233474 | 0.477630079 | 0.477630079 | Respiratory |
| HBA1C | COPD | finn-b-J10_COPD | Weighted-median | 23 | 0.281783892 | 0.142070328 | 1.32549224 | 1.003331587 | 1.751095749 | 0.047321507 | 0.189286029 | Respiratory |
| SBP | HYP | finn-b-I9_HYPTENS | IVW | 3 | 2.55668701 | 0.272961046 | 12.89303199 | 7.551025336 | 22.01426516 | 7.49844E-21 | 2.99938E-20 | Cardiovascular |
| SBP | HYP | finn-b-I9_HYPTENS | MR-Egger | 3 | 1.97849307 | 3.558075039 | 7.231836895 | 0.00676946 | 7725.796061 | 0.676927105 | 0.676927105 | Cardiovascular |
| SBP | HYP | finn-b-I9_HYPTENS | Simple-median | 3 | 2.520194839 | 0.401119658 | 12.43101847 | 5.663263458 | 27.28642617 | 3.32314E-10 | 4.43085E-10 | Cardiovascular |
| SBP | HYP | finn-b-I9_HYPTENS | Weighted-median | 3 | 2.437614361 | 0.36949978 | 11.44570284 | 5.547763049 | 23.61386243 | 4.19375E-11 | 8.38749E-11 | Cardiovascular |
| DBP | HYP | finn-b-I9_HYPTENS | IVW | 4 | 1.826931097 | 0.286573748 | 6.21478479 | 3.543966398 | 10.89839622 | 1.82865E-10 | 2.4382E-10 | Cardiovascular |
| DBP | HYP | finn-b-I9_HYPTENS | MR-Egger | 4 | 4.332126201 | 3.082226056 | 76.10593118 | 0.181040074 | 31993.53952 | 0.295077002 | 0.295077002 | Cardiovascular |
| DBP | HYP | finn-b-I9_HYPTENS | Simple-median | 4 | 1.779307245 | 0.243624879 | 5.925749902 | 3.675916471 | 9.552587 | 2.80437E-13 | 5.60875E-13 | Cardiovascular |
| DBP | HYP | finn-b-I9_HYPTENS | Weighted-median | 4 | 1.782598317 | 0.242707074 | 5.945284103 | 3.69467448 | 9.566851763 | 2.06299E-13 | 5.60875E-13 | Cardiovascular |
| BMI | HYP | finn-b-I9_HYPTENS | IVW | 7 | 0.500381731 | 0.220917888 | 1.649350758 | 1.069704743 | 2.543092326 | 0.023511926 | 0.031349234 | Cardiovascular |
| BMI | HYP | finn-b-I9_HYPTENS | MR-Egger | 7 | 1.232943341 | 0.916303119 | 3.431314214 | 0.56949187 | 20.6744255 | 0.236238332 | 0.236238332 | Cardiovascular |
| BMI | HYP | finn-b-I9_HYPTENS | Simple-median | 7 | 0.636309267 | 0.182706081 | 1.889494376 | 1.320757385 | 2.703137637 | 0.000496396 | 0.000992793 | Cardiovascular |
| BMI | HYP | finn-b-I9_HYPTENS | Weighted-median | 7 | 0.631082209 | 0.165523809 | 1.879643646 | 1.358872814 | 2.599993318 | 0.000137492 | 0.000549968 | Cardiovascular |
| GGT | HYP | finn-b-I9_HYPTENS | IVW | 27 | 0.084217174 | 0.049012442 | 1.087865124 | 0.988222689 | 1.1975545 | 0.085745279 | 0.171490558 | Cardiovascular |
| GGT | HYP | finn-b-I9_HYPTENS | MR-Egger | 27 | 0.03956326 | 0.083229672 | 1.040356309 | 0.883762517 | 1.22469694 | 0.638664254 | 0.638664254 | Cardiovascular |
| GGT | HYP | finn-b-I9_HYPTENS | Simple-median | 27 | 0.177797533 | 0.073739304 | 1.194583433 | 1.033828082 | 1.380335476 | 0.015901709 | 0.063606836 | Cardiovascular |
| GGT | HYP | finn-b-I9_HYPTENS | Weighted-median | 27 | 0.030260784 | 0.044751506 | 1.030723295 | 0.944167051 | 1.125214557 | 0.498916291 | 0.638664254 | Cardiovascular |
| BMI | ISC | finn-b-I9_ISCHHEART | IVW | 7 | 0.348139736 | 0.123958706 | 1.416430162 | 1.110911303 | 1.805971726 | 0.004977075 | 0.017163224 | Cardiovascular |
| BMI | ISC | finn-b-I9_ISCHHEART | MR-Egger | 7 | 0.060307824 | 0.499627122 | 1.062163456 | 0.398933184 | 2.828020461 | 0.908624753 | 0.908624753 | Cardiovascular |
| BMI | ISC | finn-b-I9_ISCHHEART | Simple-median | 7 | 0.398748141 | 0.163441666 | 1.489958311 | 1.081557872 | 2.052572338 | 0.014699586 | 0.019599448 | Cardiovascular |
| BMI | ISC | finn-b-I9_ISCHHEART | Weighted-median | 7 | 0.399643335 | 0.152054688 | 1.491292711 | 1.10695848 | 2.009067178 | 0.008581612 | 0.017163224 | Cardiovascular |
| HDL | ISC | finn-b-I9_ISCHHEART | IVW | 20 | -0.240608184 | 0.107117548 | 0.786149592 | 0.637272086 | 0.969807395 | 0.024690754 | 0.032921005 | Cardiovascular |
| HDL | ISC | finn-b-I9_ISCHHEART | MR-Egger | 20 | -0.179634299 | 0.210387744 | 0.835575726 | 0.553222903 | 1.26203523 | 0.404422085 | 0.404422085 | Cardiovascular |
| HDL | ISC | finn-b-I9_ISCHHEART | Simple-median | 20 | -0.247935451 | 0.0981755 | 0.780410316 | 0.643804976 | 0.946001171 | 0.011555647 | 0.023111293 | Cardiovascular |
| HDL | ISC | finn-b-I9_ISCHHEART | Weighted-median | 20 | -0.34205083 | 0.090346288 | 0.710312099 | 0.595038271 | 0.847917356 | 0.000153093 | 0.000612373 | Cardiovascular |
| CRP | ISC | finn-b-I9_ISCHHEART | IVW | 13 | -0.055318341 | 0.07881167 | 0.946183891 | 0.810755124 | 1.104234717 | 0.482738125 | 0.643650834 | Cardiovascular |
| CRP | ISC | finn-b-I9_ISCHHEART | MR-Egger | 13 | -0.157399385 | 0.165532561 | 0.854362771 | 0.617643898 | 1.181806777 | 0.362097326 | 0.643650834 | Cardiovascular |
| CRP | ISC | finn-b-I9_ISCHHEART | Simple-median | 13 | -0.023119126 | 0.084381154 | 0.977146074 | 0.828195379 | 1.152885506 | 0.784096556 | 0.784096556 | Cardiovascular |
| CRP | ISC | finn-b-I9_ISCHHEART | Weighted-median | 13 | -0.151917197 | 0.067044874 | 0.859059411 | 0.753274821 | 0.97969964 | 0.023457308 | 0.093829232 | Cardiovascular |
| DBP | ISC | finn-b-I9_ISCHHEART | IVW | 4 | 0.722930064 | 0.289394684 | 2.060461659 | 1.168494868 | 3.633308424 | 0.012486924 | 0.016649232 | Cardiovascular |
| DBP | ISC | finn-b-I9_ISCHHEART | MR-Egger | 4 | 5.381344739 | 1.801883059 | 217.31431 | 6.357619049 | 7428.175386 | 0.0962095 | 0.0962095 | Cardiovascular |
| DBP | ISC | finn-b-I9_ISCHHEART | Simple-median | 4 | 0.720583729 | 0.24619069 | 2.055632794 | 1.268772601 | 3.330483476 | 0.003423223 | 0.006846446 | Cardiovascular |
| DBP | ISC | finn-b-I9_ISCHHEART | Weighted-median | 4 | 0.862481863 | 0.226544034 | 2.369033018 | 1.519612785 | 3.693254952 | 0.000140591 | 0.000562363 | Cardiovascular |
| GGT | ISC | finn-b-I9_ISCHHEART | IVW | 27 | 0.071207592 | 0.0728952 | 1.073804115 | 0.930840813 | 1.238724454 | 0.328643994 | 0.438191992 | Cardiovascular |
| GGT | ISC | finn-b-I9_ISCHHEART | MR-Egger | 27 | 0.160753922 | 0.12296408 | 1.174395941 | 0.922880359 | 1.494457881 | 0.202999163 | 0.405998327 | Cardiovascular |
| GGT | ISC | finn-b-I9_ISCHHEART | Simple-median | 27 | 0 | 0.100615241 | 1 | 0.82102159 | 1.217994767 | 1 | 1 | Cardiovascular |
| GGT | ISC | finn-b-I9_ISCHHEART | Weighted-median | 27 | 0.125323885 | 0.061889218 | 1.133515522 | 1.004029113 | 1.279701377 | 0.04287032 | 0.17148128 | Cardiovascular |
| BMI | MYO | ieu-a-798 | IVW | 7 | 0.531330948 | 0.185494962 | 1.701195005 | 1.182653714 | 2.447093693 | 0.004178059 | 0.005570745 | Cardiovascular |
| BMI | MYO | ieu-a-798 | MR-Egger | 7 | 0.164583899 | 0.756795014 | 1.178902475 | 0.267473622 | 5.196067696 | 0.836434421 | 0.836434421 | Cardiovascular |
| BMI | MYO | ieu-a-798 | Simple-median | 7 | 0.716879392 | 0.198724607 | 2.048032123 | 1.387327399 | 3.023392733 | 0.000309279 | 0.001237117 | Cardiovascular |
| BMI | MYO | ieu-a-798 | Weighted-median | 7 | 0.581859921 | 0.175006608 | 1.789363413 | 1.269784206 | 2.521547683 | 0.000884857 | 0.001769714 | Cardiovascular |
| GGT | MYO | ieu-a-798 | IVW | 26 | 0.01117547 | 0.065013136 | 1.011238148 | 0.890252386 | 1.148665938 | 0.863519634 | 0.863519634 | Cardiovascular |
| GGT | MYO | ieu-a-798 | MR-Egger | 26 | 0.068320327 | 0.110611748 | 1.070708231 | 0.862018369 | 1.329920749 | 0.542617096 | 0.863519634 | Cardiovascular |
| GGT | MYO | ieu-a-798 | Simple-median | 26 | 0.035462155 | 0.083402048 | 1.036098436 | 0.879848223 | 1.220096763 | 0.670694348 | 0.863519634 | Cardiovascular |
| GGT | MYO | ieu-a-798 | Weighted-median | 26 | 0.049350571 | 0.054235875 | 1.050588593 | 0.944639652 | 1.168420559 | 0.362862138 | 0.863519634 | Cardiovascular |
| ALB | MYO | ieu-a-798 | IVW | 10 | -0.043687483 | 0.11310599 | 0.957253068 | 0.76691813 | 1.194825628 | 0.699309598 | 0.699309598 | Cardiovascular |
| ALB | MYO | ieu-a-798 | MR-Egger | 10 | -0.210622476 | 0.245243295 | 0.810079834 | 0.500924777 | 1.310035692 | 0.415424122 | 0.553898829 | Cardiovascular |
| ALB | MYO | ieu-a-798 | Simple-median | 10 | -0.140433215 | 0.130095422 | 0.868981698 | 0.673396991 | 1.121372982 | 0.280381309 | 0.553898829 | Cardiovascular |
| ALB | MYO | ieu-a-798 | Weighted-median | 10 | -0.194979842 | 0.113924385 | 0.822851245 | 0.658183417 | 1.028716545 | 0.086991673 | 0.347966691 | Cardiovascular |
| BMI | OA | finn-b-M13_ARTHROSIS | IVW | 7 | 0.600047168 | 0.109590007 | 1.822204748 | 1.46998288 | 2.258822322 | 4.36568E-08 | 1.74627E-07 | Musculoskeletal |
| BMI | OA | finn-b-M13_ARTHROSIS | MR-Egger | 7 | 0.778001805 | 0.442350934 | 2.177117611 | 0.914840061 | 5.18105983 | 0.138940007 | 0.138940007 | Musculoskeletal |
| BMI | OA | finn-b-M13_ARTHROSIS | Simple-median | 7 | 0.565661967 | 0.163206347 | 1.760612864 | 1.278615085 | 2.424308688 | 0.000528399 | 0.000704531 | Musculoskeletal |
| BMI | OA | finn-b-M13_ARTHROSIS | Weighted-median | 7 | 0.616605629 | 0.143607762 | 1.852628848 | 1.398128303 | 2.454877454 | 1.75737E-05 | 3.51473E-05 | Musculoskeletal |
| BMI | OBS | ieu-a-90 | IVW | 6 | 2.052616369 | 0.470700426 | 7.78825141 | 3.095791266 | 19.59333005 | 1.29605E-05 | 1.72807E-05 | Overweight |
| BMI | OBS | ieu-a-90 | MR-Egger | 6 | 5.791831446 | 1.57844468 | 327.6124799 | 14.85118818 | 7227.026937 | 0.021403794 | 0.021403794 | Overweight |
| BMI | OBS | ieu-a-90 | Simple-median | 6 | 1.24981149 | 0.285055944 | 3.489685054 | 1.995913497 | 6.10141762 | 1.16283E-05 | 1.72807E-05 | Overweight |
| BMI | OBS | ieu-a-90 | Weighted-median | 6 | 1.193668672 | 0.267082294 | 3.299162578 | 1.954603531 | 5.568635043 | 7.84791E-06 | 1.72807E-05 | Overweight |
| DBP | OBS | ieu-a-90 | IVW | 3 | 0.12449763 | 0.425021105 | 1.132579337 | 0.492360683 | 2.605276981 | 0.769582495 | 0.769582495 | Overweight |
| DBP | OBS | ieu-a-90 | MR-Egger | 3 | 2.367875555 | 4.879915687 | 10.67469039 | 0.000749009 | 152132.9825 | 0.71240004 | 0.769582495 | Overweight |
| DBP | OBS | ieu-a-90 | Simple-median | 3 | -0.201850023 | 0.358915868 | 0.817217483 | 0.40441038 | 1.65140275 | 0.573851607 | 0.769582495 | Overweight |
| DBP | OBS | ieu-a-90 | Weighted-median | 3 | -0.214049067 | 0.366570255 | 0.807308772 | 0.393558023 | 1.656039045 | 0.559271634 | 0.769582495 | Overweight |
| CRP | OBS | ieu-a-90 | IVW | 11 | -0.015568064 | 0.066919683 | 0.984552492 | 0.863526542 | 1.122540606 | 0.816042482 | 0.816042482 | Overweight |
| CRP | OBS | ieu-a-90 | MR-Egger | 11 | -0.075368684 | 0.12494195 | 0.927401505 | 0.72596396 | 1.184733126 | 0.561248125 | 0.780907538 | Overweight |
| CRP | OBS | ieu-a-90 | Simple-median | 11 | 0.090622201 | 0.122836022 | 1.094855292 | 0.860590583 | 1.392890109 | 0.460666746 | 0.780907538 | Overweight |
| CRP | OBS | ieu-a-90 | Weighted-median | 11 | -0.04637191 | 0.085069536 | 0.954686838 | 0.808068698 | 1.127907765 | 0.585680654 | 0.780907538 | Overweight |
| SHBG | PROST | finn-b-C3_PROSTATE_EXALLC | IVW | 23 | 0.128510027 | 0.103712017 | 1.137132823 | 0.927961044 | 1.393454031 | 0.2153068 | 0.287075734 | Cancer |
| SHBG | PROST | finn-b-C3_PROSTATE_EXALLC | MR-Egger | 23 | 0.221871165 | 0.165700406 | 1.248410529 | 0.90221572 | 1.727445902 | 0.194888723 | 0.287075734 | Cancer |
| SHBG | PROST | finn-b-C3_PROSTATE_EXALLC | Simple-median | 23 | 0.136110538 | 0.15692441 | 1.145808542 | 0.842432865 | 1.558435419 | 0.385742759 | 0.385742759 | Cancer |
| SHBG | PROST | finn-b-C3_PROSTATE_EXALLC | Weighted-median | 23 | 0.165998279 | 0.099215373 | 1.18057107 | 0.971937427 | 1.433989487 | 0.094305552 | 0.287075734 | Cancer |
| BMI | T2D | finn-b-E4_DM2 | IVW | 7 | 0.957551068 | 0.343809974 | 2.60530843 | 1.328012572 | 5.111120301 | 0.005350838 | 0.007134451 | Diabetes |
| BMI | T2D | finn-b-E4_DM2 | MR-Egger | 7 | 2.318698534 | 1.383894385 | 10.16243962 | 0.674533147 | 153.1061586 | 0.15468862 | 0.15468862 | Diabetes |
| BMI | T2D | finn-b-E4_DM2 | Simple-median | 7 | 0.721638989 | 0.256274231 | 2.057803165 | 1.245256454 | 3.400547615 | 0.004864294 | 0.007134451 | Diabetes |
| BMI | T2D | finn-b-E4_DM2 | Weighted-median | 7 | 0.715558321 | 0.231307688 | 2.045328313 | 1.299780304 | 3.218519234 | 0.001977875 | 0.007134451 | Diabetes |
| HBA1C | T2D | finn-b-E4_DM2 | IVW | 23 | 0.431404566 | 0.134211422 | 1.53941822 | 1.183350922 | 2.002625267 | 0.001307331 | 0.002614663 | Diabetes |
| HBA1C | T2D | finn-b-E4_DM2 | MR-Egger | 23 | -0.01800497 | 0.382275237 | 0.982156151 | 0.464281405 | 2.077685419 | 0.962878981 | 0.962878981 | Diabetes |
| HBA1C | T2D | finn-b-E4_DM2 | Simple-median | 23 | 0.418098436 | 0.111603858 | 1.519070198 | 1.220615055 | 1.890501234 | 0.000179482 | 0.000717927 | Diabetes |
| HBA1C | T2D | finn-b-E4_DM2 | Weighted-median | 23 | 0.165784758 | 0.096992813 | 1.18031902 | 0.97597222 | 1.42745148 | 0.087405048 | 0.116540064 | Diabetes |
| DBP | T2D | finn-b-E4_DM2 | IVW | 3 | 0.007562507 | 0.213431212 | 1.007591175 | 0.663144298 | 1.530948812 | 0.971734476 | 0.971734476 | Diabetes |
| DBP | T2D | finn-b-E4_DM2 | MR-Egger | 3 | 1.945997037 | 1.996248448 | 7.000608243 | 0.139924831 | 350.2488828 | 0.508114489 | 0.971734476 | Diabetes |
| DBP | T2D | finn-b-E4_DM2 | Simple-median | 3 | -0.178800364 | 0.271134785 | 0.836272833 | 0.491533815 | 1.422795808 | 0.509605589 | 0.971734476 | Diabetes |
| DBP | T2D | finn-b-E4_DM2 | Weighted-median | 3 | -0.078432653 | 0.2480144 | 0.924564325 | 0.568621154 | 1.503319363 | 0.751818578 | 0.971734476 | Diabetes |
| DBP | T2D | finn-b-E4_DM2 | IVW | 4 | 0.370185837 | 0.262505397 | 1.448003682 | 0.865606605 | 2.422248921 | 0.158479819 | 0.317326109 | Diabetes |
| DBP | T2D | finn-b-E4_DM2 | MR-Egger | 4 | 2.001912454 | 3.054622307 | 7.403200854 | 0.018589706 | 2948.265107 | 0.579536739 | 0.579536739 | Diabetes |
| DBP | T2D | finn-b-E4_DM2 | Simple-median | 4 | 0.259132201 | 0.199644749 | 1.295805101 | 0.876190711 | 1.916376012 | 0.194298836 | 0.317326109 | Diabetes |
| DBP | T2D | finn-b-E4_DM2 | Weighted-median | 4 | 0.245802429 | 0.208304643 | 1.278646925 | 0.850037621 | 1.923371294 | 0.237994581 | 0.317326109 | Diabetes |
| URA | T2D | finn-b-E4_DM2 | IVW | 8 | 0.005930804 | 0.102492619 | 1.005948426 | 0.822871909 | 1.22975669 | 0.95385563 | 0.95385563 | Diabetes |
| URA | T2D | finn-b-E4_DM2 | MR-Egger | 8 | -0.217594654 | 0.225111762 | 0.804451457 | 0.517464835 | 1.250601204 | 0.371069936 | 0.95385563 | Diabetes |
| URA | T2D | finn-b-E4_DM2 | Simple-median | 8 | 0.091470843 | 0.154029307 | 1.095784826 | 0.810238526 | 1.481964072 | 0.552610104 | 0.95385563 | Diabetes |
| URA | T2D | finn-b-E4_DM2 | Weighted-median | 8 | -0.022978311 | 0.141688485 | 0.97728368 | 0.740308904 | 1.290114688 | 0.871168153 | 0.95385563 | Diabetes |

**Table S16. Heterogeneity test for the IVW and MR-Egger methods for imputed array-based MR analysis.** Cochran’s Q test statistics for heterogeneity in the two-sample Mendelian randomization analysis for the array-based data (UK Biobank) Analyses performed using the R package *twosamplemr(4).*(Q: Q-value, DF: degrees 0f freedom).

| **Exposure** | **Outcome** | **Outcome dataset** | **Method** | **Q** | **DF** | **P-value** | **Group** |
| --- | --- | --- | --- | --- | --- | --- | --- |
| BMI | finn-b-I9_ANGINA | ANG | MR-Egger | 1.701713 | 5 | 0.888684 | Cardiovascular |
| BMI | finn-b-I9_ANGINA | ANG | IVW | 2.646721 | 6 | 0.851699 | Cardiovascular |
| GGT | finn-b-I9_ANGINA | ANG | MR-Egger | 69.51703 | 25 | 4.54E-06 | Cardiovascular |
| GGT | finn-b-I9_ANGINA | ANG | IVW | 71.82518 | 26 | 3.59E-06 | Cardiovascular |
| SHBG | finn-b-I9_ANGINA | ANG | MR-Egger | 52.64802 | 21 | 0.000154 | Cardiovascular |
| SHBG | finn-b-I9_ANGINA | ANG | IVW | 55.95907 | 22 | 8.67E-05 | Cardiovascular |
| BMI | finn-b-I9_CORIATHER | CAD | MR-Egger | 2.646536 | 5 | 0.754283 | Cardiovascular |
| BMI | finn-b-I9_CORIATHER | CAD | IVW | 3.1851 | 6 | 0.785282 | Cardiovascular |
| CHO | finn-b-I9_CORIATHER | CAD | MR-Egger | 201.2819 | 18 | 5.55E-33 | Cardiovascular |
| CHO | finn-b-I9_CORIATHER | CAD | IVW | 202.1591 | 19 | 1.27E-32 | Cardiovascular |
| GGT | finn-b-I9_CORATHER | CAD | MR-Egger | 91.80764 | 25 | 1.45E-09 | Cardiovascular |
| GGT | finn-b-I9_CORATHER | CAD | IVW | 99.51907 | 26 | 1.54E-10 | Cardiovascular |
| APOB | finn-b-I9_CORATHER | CAD | MR-Egger | 201.5786 | 21 | 1.77E-31 | Cardiovascular |
| APOB | finn-b-I9_CORATHER | CAD | IVW | 207.3809 | 22 | 4.06E-32 | Cardiovascular |
| LDL | finn-b-I9_CORATHER | CAD | MR-Egger | 200.2048 | 18 | 9.12E-33 | Cardiovascular |
| LDL | finn-b-I9_CORATHER | CAD | IVW | 206.5726 | 19 | 1.67E-33 | Cardiovascular |
| TRIG | finn-b-I9_CORATHER | CAD | MR-Egger | 42.46323 | 17 | 0.000575 | Cardiovascular |
| TRIG | finn-b-I9_CORATHER | CAD | IVW | 44.23963 | 18 | 0.000533 | Cardiovascular |
| HDL | finn-b-I9_CORATHER | CAD | MR-Egger | 68.94868 | 18 | 6.8E-08 | Cardiovascular |
| HDL | finn-b-I9_CORATHER | CAD | IVW | 69.28432 | 19 | 1.21E-07 | Cardiovascular |
| DBP | finn-b-I9_CORIATHER | CAD | MR-Egger | 2.751169 | 2 | 0.252692 | Cardiovascular |
| DBP | finn-b-I9_CORIATHER | CAD | IVW | 15.34677 | 3 | 0.001543 | Cardiovascular |
| BMI | finn-b-J10_COPD | COPD | MR-Egger | 1.526585 | 5 | 0.909982 | Respiratory |
| BMI | finn-b-J10_COPD | COPD | IVW | 1.881634 | 6 | 0.930256 | Respiratory |
| HDL | finn-b-J10_COPD | COPD | MR-Egger | 28.47698 | 18 | 0.055158 | Respiratory |
| HDL | finn-b-J10_COPD | COPD | IVW | 30.35068 | 19 | 0.047502 | Respiratory |
| APOA | finn-b-J10_COPD | COPD | MR-Egger | 32.23907 | 21 | 0.055366 | Respiratory |
| APOA | finn-b-J10_COPD | COPD | IVW | 33.84303 | 22 | 0.050959 | Respiratory |
| ALB | finn-b-J10_COPD | COPD | MR-Egger | 8.805713 | 10 | 0.550636 | Respiratory |
| ALB | finn-b-J10_COPD | COPD | IVW | 11.10425 | 11 | 0.434572 | Respiratory |
| HBA1C | finn-b-J10_COPD | COPD | MR-Egger | 22.07707 | 21 | 0.39508 | Respiratory |
| HBA1C | finn-b-J10_COPD | COPD | IVW | 23.67378 | 22 | 0.364558 | Respiratory |
| SBP | finn-b-I9_HYPTENS | HYP | MR-Egger | 4.105739 | 1 | 0.042738 | Cardiovascular |
| SBP | finn-b-I9_HYPTENS | HYP | IVW | 4.215416 | 2 | 0.121516 | Cardiovascular |
| DBP | finn-b-I9_HYPTENS | HYP | MR-Egger | 8.649002 | 2 | 0.01324 | Cardiovascular |
| DBP | finn-b-I9_HYPTENS | HYP | IVW | 11.53392 | 3 | 0.009163 | Cardiovascular |
| BMI | finn-b-I9_HYPTENS | HYP | MR-Egger | 24.78273 | 5 | 0.000153 | Cardiovascular |
| BMI | finn-b-I9_HYPTENS | HYP | IVW | 28.15797 | 6 | 8.77E-05 | Cardiovascular |
| GGT | finn-b-I9_HYPTENS | HYP | MR-Egger | 56.57298 | 25 | 0.000305 | Cardiovascular |
| GGT | finn-b-I9_HYPTENS | HYP | IVW | 57.58183 | 26 | 0.000351 | Cardiovascular |
| BMI | finn-b-I9_ISCHHEART | ISC | MR-Egger | 2.319798 | 5 | 0.803355 | Cardiovascular |
| BMI | finn-b-I9_ISCHHEART | ISC | IVW | 2.673451 | 6 | 0.848573 | Cardiovascular |
| HDL | finn-b-I9_ISCHHEART | ISC | MR-Egger | 65.61097 | 18 | 2.46E-07 | Cardiovascular |
| HDL | finn-b-I9_ISCHHEART | ISC | IVW | 66.03145 | 19 | 4.15E-07 | Cardiovascular |
| CRP | finn-b-I9_ISCHHEART | ISC | MR-Egger | 32.18691 | 11 | 0.000712 | Cardiovascular |
| CRP | finn-b-I9_ISCHHEART | ISC | IVW | 33.64453 | 12 | 0.000767 | Cardiovascular |
| DBP | finn-b-I9_ISCHHEART | ISC | MR-Egger | 1.244076 | 2 | 0.536849 | Cardiovascular |
| DBP | finn-b-I9_ISCHHEART | ISC | IVW | 7.99321 | 3 | 0.046152 | Cardiovascular |
| GGT | finn-b-I9_ISCHHEART | ISC | MR-Egger | 83.3879 | 25 | 3.33E-08 | Cardiovascular |
| GGT | finn-b-I9_ISCHHEART | ISC | IVW | 86.12558 | 26 | 2.31E-08 | Cardiovascular |
| BMI | ieu-a-798 | MYO | MR-Egger | 15.23165 | 5 | 0.009417 | Cardiovascular |
| BMI | ieu-a-798 | MYO | IVW | 15.99978 | 6 | 0.013755 | Cardiovascular |
| GGT | ieu-a-798 | MYO | MR-Egger | 68.05099 | 24 | 4.3E-06 | Cardiovascular |
| GGT | ieu-a-798 | MYO | IVW | 69.22207 | 25 | 5.02E-06 | Cardiovascular |
| ALB | ieu-a-798 | MYO | MR-Egger | 13.78212 | 8 | 0.087624 | Cardiovascular |
| ALB | ieu-a-798 | MYO | IVW | 14.80904 | 9 | 0.096317 | Cardiovascular |
| BMI | finn-b-M13_ARTHROSIS | OA | MR-Egger | 2.806539 | 5 | 0.729782 | Musculoskeletal |
| BMI | finn-b-M13_ARTHROSIS | OA | IVW | 2.978962 | 6 | 0.811483 | Musculoskeletal |
| BMI | ieu-a-90 | OBS | MR-Egger | 22.7008 | 4 | 0.000145 | Overweight |
| BMI | ieu-a-90 | OBS | IVW | 56.05028 | 5 | 7.94E-11 | Overweight |
| DBP | ieu-a-90 | OBS | MR-Egger | 4.285801 | 1 | 0.038432 | Overweight |
| DBP | ieu-a-90 | OBS | IVW | 5.203021 | 2 | 0.074161 | Overweight |
| CRP | ieu-a-90 | OBS | MR-Egger | 8.998849 | 9 | 0.43738 | Overweight |
| CRP | ieu-a-90 | OBS | IVW | 9.320089 | 10 | 0.502019 | Overweight |
| SHBG | finn-b-C3_PROSTATE_EXALLC | PROST | MR-Egger | 36.67455 | 21 | 0.018341 | Cancer |
| SHBG | finn-b-C3_PROSTATE_EXALLC | PROST | IVW | 37.59905 | 22 | 0.020312 | Cancer |
| BMI | finn-b-E4_DM2 | T2D | MR-Egger | 43.52282 | 5 | 2.89E-08 | Diabetes |
| BMI | finn-b-E4_DM2 | T2D | IVW | 52.4945 | 6 | 1.48E-09 | Diabetes |
| HBA1C | finn-b-E4_DM2 | T2D | MR-Egger | 138.13 | 21 | 3.07E-19 | Diabetes |
| HBA1C | finn-b-E4_DM2 | T2D | IVW | 148.4621 | 22 | 9.33E-21 | Diabetes |
| SBP | finn-b-E4_DM2 | T2D | MR-Egger | 0.005755 | 1 | 0.939528 | Diabetes |
| SBP | finn-b-E4_DM2 | T2D | IVW | 0.959575 | 2 | 0.618915 | Diabetes |
| DBP | finn-b-E4_DM2 | T2D | MR-Egger | 6.53467 | 2 | 0.038108 | Diabetes |
| DBP | finn-b-E4_DM2 | T2D | IVW | 7.476124 | 3 | 0.058175 | Diabetes |
| SBP | finn-b-E4_DM2 | T2D | MR-Egger | 0.005755 | 1 | 0.939528 | Diabetes |
| SBP | finn-b-E4_DM2 | T2D | IVW | 0.959575 | 2 | 0.618915 | Diabetes |

**Table S17. Egger intercept test for the imputed array-based two-sample Mendelian randomization analyses.** Egger intercept test for horizontal pleiotropy (UK Biobank imputed array-based analysis).

| **Exposure** | **Outcome** | **Outcome dataset** | **Intercept** | **SE** | **P-value** | **Disease group** |
| --- | --- | --- | --- | --- | --- | --- |
| BMI | ANG | finn-b-I9_ANGINA | 0.02209775 | 0.022732 | 0.37564 | Cardiovascular |
| GGT | ANG | finn-b-I9_ANGINA | -0.0070998 | 0.007793 | 0.3709548 | Cardiovascular |
| SHBG | ANG | finn-b-I9_ANGINA | -0.0098255 | 0.00855 | 0.2633885 | Cardiovascular |
| BMI | CAD | finn-b-I9_CORATHER | 0.01524656 | 0.020776 | 0.4959768 | Cardiovascular |
| CHO | CAD | finn-b-I9_CORATHER | 0.00611331 | 0.021827 | 0.7826085 | Cardiovascular |
| GGT | CAD | finn-b-I9_CORATHER | -0.0118331 | 0.008166 | 0.1597386 | Cardiovascular |
| APOB | CAD | finn-b-I9_CORATHER | 0.01349354 | 0.017356 | 0.4455486 | Cardiovascular |
| LDL | CAD | finn-b-I9_CORATHER | 0.01661032 | 0.021952 | 0.4590504 | Cardiovascular |
| TRIG | CAD | finn-b-I9_CORATHER | 0.0098291 | 0.011655 | 0.4107626 | Cardiovascular |
| HDL | CAD | finn-b-I9_CORATHER | -0.0038077 | 0.012863 | 0.7706083 | Cardiovascular |
| DBP | CAD | finn-b-I9_CORIATHER | -0.2469313 | 0.081604 | 0.0940568 | Cardiovascular |
| BMI | COPD | finn-b-J10_COPD | 0.018283 | 0.030683 | 0.5772151 | Respiratory |
| HDL | COPD | finn-b-J10_COPD | -0.0132887 | 0.012211 | 0.2908293 | Respiratory |
| APOA | COPD | finn-b-J10_COPD | -0.0138636 | 0.013563 | 0.3183414 | Respiratory |
| ALB | COPD | finn-b-J10_COPD | 0.02312154 | 0.015251 | 0.1604499 | Respiratory |
| HBA1C | COPD | finn-b-J10_COPD | -0.015643 | 0.012693 | 0.2314196 | Respiratory |
| SBP | HYP | finn-b-I9_HYPTENS | 0.01682649 | 0.102951 | 0.8968619 | Cardiovascular |
| DBP | HYP | finn-b-I9_HYPTENS | -0.0856915 | 0.104915 | 0.4998753 | Cardiovascular |
| BMI | HYP | finn-b-I9_HYPTENS | -0.0276702 | 0.033531 | 0.4468233 | Cardiovascular |
| GGT | HYP | finn-b-I9_HYPTENS | 0.00311154 | 0.00466 | 0.5104462 | Cardiovascular |
| BMI | ISC | finn-b-I9_ISCHHEART | 0.01087214 | 0.018282 | 0.5779404 | Cardiovascular |
| HDL | ISC | finn-b-I9_ISCHHEART | -0.0037532 | 0.011051 | 0.7380556 | Cardiovascular |
| CRP | ISC | finn-b-I9_ISCHHEART | 0.00884676 | 0.012534 | 0.4949922 | Cardiovascular |
| DBP | ISC | finn-b-I9_ISCHHEART | -0.1594018 | 0.061358 | 0.1217028 | Cardiovascular |
| GGT | ISC | finn-b-I9_ISCHHEART | -0.0062221 | 0.006868 | 0.3736051 | Cardiovascular |
| BMI | MYO | ieu-a-798 | 0.01408968 | 0.028059 | 0.6368942 | Cardiovascular |
| GGT | MYO | ieu-a-798 | -0.0040067 | 0.006235 | 0.5265369 | Cardiovascular |
| ALB | MYO | ieu-a-798 | 0.0090339 | 0.011701 | 0.4622698 | Cardiovascular |
| BMI | OA | finn-b-M13_ARTHROSIS | -0.0067191 | 0.016181 | 0.6951852 | Musculoskeletal |
| BMI | OBS | ieu-a-90 | -0.1367504 | 0.056412 | 0.0724398 | Overweight |
| DBP | OBS | ieu-a-90 | -0.0743323 | 0.160678 | 0.7241552 | Overweight |
| CRP | OBS | ieu-a-90 | 0.00491874 | 0.008678 | 0.5847197 | Overweight |
| SHBG | PROST | finn-b-C3_PROSTATE_EXALLC | -0.0080412 | 0.011052 | 0.4749048 | Cancer |
| BMI | T2D | finn-b-E4_DM2 | -0.0513973 | 0.050626 | 0.3565778 | Diabetes |
| HBA1C | T2D | finn-b-E4_DM2 | 0.02225159 | 0.017754 | 0.2238662 | Diabetes |
| SBP | T2D | finn-b-E4_DM2 | -0.0563674 | 0.057716 | 0.5075243 | Diabetes |
| DBP | T2D | finn-b-E4_DM2 | -0.0558295 | 0.104007 | 0.6451365 | Diabetes |
| URA | T2D | finn-b-E4_DM2 | 0.01099551 | 0.009901 | 0.3092638 | Diabetes |

**Table S18 MR-PRESSO results for the exome-based two sample Mendelian randomization analysis.** Outlier correction results using the *R package MRPRESSO(5)* (UK Biobank exome-based analysis).

| **Exposure** | **Outcome** | **MR-analysis** | **Estimate** | **SD** | **T-value** | **P-value** | **Group** | **Remarks** |
| --- | --- | --- | --- | --- | --- | --- | --- | --- |
| SBP | ANG | IVW | 1.3100313403898 | 0.188080416751194 | 6.96527242452251 | 0.00607202514705131 | Cardiovascular |  |
| SBP | ANG | Outlier-corrected | NA | NA | NA | NA | Cardiovascular | No outliers found |
| DBP | ANG | IVW | 1.2231669925931 | 0.133053804604731 | 9.19302530451363 | 0.000777699904411885 | Cardiovascular |  |
| DBP | ANG | Outlier-corrected | NA | NA | NA | NA | Cardiovascular | No outliers found |
| AST | ANX | IVW | -0.0204046473783361 | 0.10901028390181 | -0.187180939705793 | 0.855670483136667 | Mental |  |
| AST | ANX | Outlier-corrected | NA | NA | NA | NA | Mental | No outliers found |
| LDL | CAD | IVW | 0.523571924365277 | 0.0955681059543074 | 5.47852151235063 | 3.33563325542481e-05 | Cardiovascular |  |
| LDL | CAD | Outlier-corrected | 0.598016575772264 | 0.0529057324241942 | 11.3034362888583 | 2.00738211100177e-08 | Cardiovascular |  |
| APOB | CAD | IVW | 0.411817746746716 | 0.0880706137740256 | 4.67599496698605 | 0.000216986582109571 | Cardiovascular |  |
| APOB | CAD | Outlier-corrected | 0.510280162568416 | 0.0634744337804727 | 8.03914477336227 | 3.57649833548213e-06 | Cardiovascular |  |
| SBP | CAD | IVW | 1.27851713515713 | 0.190494213324856 | 6.71157991018254 | 0.00675045049973008 | Cardiovascular |  |
| SBP | CAD | Outlier-corrected | NA | NA | NA | NA | Cardiovascular | No outliers found |
| CHO | CAD | IVW | 0.568439668637573 | 0.134435904154583 | 4.22833224659941 | 0.000412472606048498 | Cardiovascular |  |
| CHO | CAD | Outlier-corrected | 0.544363767959939 | 0.0661741931135885 | 8.22622448944009 | 2.49170967495083e-07 | Cardiovascular |  |
| HDL | COPD | IVW | -0.00253956487422105 | 0.0782012275031094 | -0.0324747443909378 | 0.974386287194436 | Respiratory |  |
| HDL | COPD | Outlier-corrected | NA | NA | NA | NA | Respiratory | No outliers found |
| TPROT | COPD | IVW | -0.196293917670356 | 0.154007166481199 | -1.27457651585531 | 0.243135923291373 | Respiratory |  |
| TPROT | COPD | Outlier-corrected | NA | NA | NA | NA | Respiratory | No outliers found |
| SBP | HYP | IVW | 2.09924149118261 | 0.187020732375721 | 11.2246458695567 | 0.0015159359386209 | Cardiovascular |  |
| SBP | HYP | Outlier-corrected | NA | NA | NA | NA | Cardiometabolic | No outliers found |
| DBP | HYP | IVW | 2.09924149118261 | 0.187020732375721 | 11.2246458695567 | 0.0015159359386209 | Cardiovascular |  |
| DBP | HYP | Outlier-corrected | NA | NA | NA | NA | Cardiometabolic | No outliers found |
| SBP | ISC | IVW | 2.09924149118261 | 0.187020732375721 | 11.2246458695567 | 0.0015159359386209 | Cardiovascular |  |
| SBP | ISC | Outlier-corrected | NA | NA | NA | NA | Cardiovascular | No outliers found |
| APOB | ISC | IVW | 0.369426380709421 | 0.0740748421401439 | 4.98720442779337 | 0.000112552531423065 | Cardiovascular |  |
| APOB | ISC | Outlier-corrected | 0.391937593729852 | 0.0554525829305514 | 7.06797723418427 | 2.07753829054852e-05 | Cardiovascular |  |
| LDL | MYO | IVW | 0.356067020512465 | 0.0947930313186364 | 3.75625734887183 | 0.00144564811117376 | Cardiovascular |  |
| LDL | MYO | Outlier-corrected | 0.414321231682179 | 0.0746280168761231 | 5.55181886140592 | 5.54135023166808e-05 | Cardiovascular |  |
| APOB | MYO | IVW | 0.264800982487034 | 0.083533259091671 | 3.17000659816752 | 0.00559717401188899 | Cardiovascular |  |
| APOB | MYO | Outlier-corrected | 0.2970222133448 | 0.0813261723955996 | 3.65223401760478 | 0.00292482551258201 | Cardiovascular |  |
| CHO | MYO | IVW | 0.264800982487034 | 0.083533259091671 | 3.17000659816752 | 0.00559717401188899 | Cardiovascular |  |
| CHO | MYO | Outlier-corrected | 0.2970222133448 | 0.0813261723955996 | 3.65223401760478 | 0.00292482551258201 | Cardiovascular |  |
| PHOS | MYO | IVW | -0.0794323399772692 | 0.135520084059659 | -0.5861296539803 | 0.572192756171483 | Cardiovascular |  |
| PHOS | MYO | Outlier-corrected | 0.0357923298202631 | 0.112356760880971 | 0.318559644649963 | 0.760857729661477 | Cardiovascular |  |
| URT | MYO | IVW | 0.118101591839379 | 0.0879384422973155 | 1.3430030002133 | 0.20063950257939 | Cardiovascular |  |
| URT | MYO | Outlier-corrected | 0.0867827495984809 | 0.0571414114623479 | 1.5187365411102 | 0.152768488929204 | Cardiovascular |  |
| ALB | MYO | IVW | 0.264800982487034 | 0.083533259091671 | 3.17000659816752 | 0.00559717401188899 | Cardiovascular |  |
| ALB | MYO | Outlier-corrected | 0.2970222133448 | 0.0813261723955996 | 3.65223401760478 | 0.00292482551258201 | Cardiovascular |  |
| LDL | OBS | IVW | -0.229536071157086 | 0.102379989815395 | -2.24200130876132 | 0.0405053039869722 | Overweight |  |
| LDL | OBS | Outlier-corrected | -0.214891381105948 | 0.0741409360550114 | -2.89841742686526 | 0.0124456657032846 | Overweight |  |
| CHO | OBS | IVW | -0.221263025375306 | 0.109035431893781 | -2.02927636945442 | 0.0574831004995179 | Overweight |  |
| CHO | OBS | Outlier-corrected | -0.250025331693681 | 0.0684559115688043 | -3.6523555959427 | 0.00235843116146771 | Overweight |  |
| APOB | OBS | IVW | -0.17798060436354 | 0.0830705086122965 | -2.14252455337916 | 0.0502109373490302 | Overweight |  |
| APOB | OBS | Outlier-corrected | -0.167358234727244 | 0.0490150630549172 | -3.41442455230005 | 0.00513113765949314 | Overweight |  |
| CRP | OBS | IVW | -0.17798060436354 | 0.0830705086122965 | -2.14252455337916 | 0.0502109373490302 | Overweight |  |
| CRP | OBS | Outlier-corrected | -0.167358234727244 | 0.0490150630549172 | -3.41442455230005 | 0.00513113765949314 | Overweight |  |
| HBA1C | T2D | IVW | 0.284301635638997 | 0.164368824394027 | 1.7296566832982 | 0.107346367857643 | Diabetes |  |
| HBA1C | T2D | Outlier-corrected | 0.154844265121671 | 0.102756368434225 | 1.50690674924726 | 0.166102322033656 | Diabetes |  |
| CRP | T2D | IVW | 0.239015458096731 | 0.139039289556619 | 1.71904976542188 | 0.160728700749473 | Diabetes |  |
| CRP | T2D | Outlier-corrected | NA | NA | NA | NA | Diabetes | No outliers found |

**Table S19. MR-PRESSO results for the imputed array-based two sample Mendelian randomization analysis.** Outlier correction results using the *R package MRPRESSO(5)* (UK Biobank imputed array-based analysis).

| **Exposure** | **Outcome** | **MR-analys** | **Estimate** | **SD** | **T-value** | **P-value** | **Group** | **Remarks** |
| --- | --- | --- | --- | --- | --- | --- | --- | --- |
| BMI | ANG | IVW | 0.335818915949715 | 0.102330964810573 | 3.28169402654764 | 0.0167870118241996 | Cardiovascular | |
| BMI | ANG | Outlier corrected | NA | NA | NA | NA | Cardiovascular | No outliers found |
| GGT | ANG | IVW | 0.0523633058191332 | 0.0826723107354137 | 0.633383842224005 | 0.532015532844089 | Cardiovascular | |
| GGT | ANG | Outlier corrected | 0.0519300433629597 | 0.0712020202368335 | 0.729333847413725 | 0.472855851486063 | Cardiovascular | |
| SHBG | ANG | IVW | -0.123014511003798 | 0.0814944577657294 | -1.50948315230744 | 0.145404673009696 | Cardiovascular | |
| SHBG | ANG | Outlier corrected | -0.105470160024124 | 0.0689652490508915 | -1.52932326752412 | 0.141847443687483 | Cardiovascular | |
| BMI | CAD | IVW | 0.421954986044872 | 0.102574443821047 | 4.1136463462675 | 0.00626069226579092 | Cardiovascular | |
| BMI | CAD | Outlier corrected | NA | NA | NA | NA | Cardiovascular | No outliers found |
| CHO | CAD | IVW | 0.757666655559105 | 0.175021202198905 | 4.32899926431796 | 0.000361681534296666 | Cardiovascular | |
| CHO | CAD | Outlier corrected | 0.723399105153683 | 0.0762646112375227 | 9.48538376339046 | 9.96760800254246e-08 | Cardiovascular | |
| GGT | CAD | IVW | 0.10872097785147 | 0.0886309329818376 | 1.22667080435392 | 0.230939399565342 | Cardiovascular | |
| GGT | CAD | Outlier corrected | 0.0737726836911568 | 0.0974668449160348 | 0.756900295220494 | 0.457518299193332 | Cardiovascular | |
| APOB | CAD | IVW | 0.665495572931956 | 0.143420300714093 | 4.64017694579107 | 0.000126339437923976 | Cardiovascular | |
| APOB | CAD | Outlier corrected | 0.694703934964204 | 0.0565927588390289 | 12.2754915861268 | 3.4988039428117e-10 | Cardiovascular | |
| LDL | CAD | IVW | 0.680435279940693 | 0.157174592660507 | 4.32916840071229 | 0.000361542259941903 | Cardiovascular | |
| LDL | CAD | Outlier corrected | 0.672768474628645 | 0.0643263492624221 | 10.4586764575129 | 2.76106302997545e-08 | Cardiovascular | |
| TRIG | CAD | IVW | 0.351515676682862 | 0.0862602047356826 | 4.07506193336744 | 0.000710578446344474 | Cardiovascular | |
| TRIG | CAD | Outlier corrected | 0.385395494398161 | 0.074030096062758 | 5.20592995140041 | 7.13837611457368e-05 | Cardiovascular | |
| HDL | CAD | IVW | -0.268354118651922 | 0.124531106517075 | -2.15491635911166 | 0.0442079305197426 | Cardiovascular | |
| HDL | CAD | Outlier corrected | -0.322672787471135 | 0.117573258383749 | -2.74444029115837 | 0.0133294822743222 | Cardiovascular | |
| DBP | CAD | IVW | 0.956477736737671 | 0.454722020081784 | 2.10343395414553 | 0.126152245256795 | Cardiovascular | |
| DBP | CAD | Outlier corrected | 1.08111131037352 | 0.474817836090897 | 2.27689700806976 | 0.263453371545554 | Cardiovascular | |
| BMI | COPD | IVW | 0.496699727017193 | 0.116347894437496 | 4.26909081095599 | 0.0052683312805984 | Respiratory | |
| BMI | COPD | Outlier corrected | NA | NA | NA | NA | Respiratory | No outliers found |
| HDL | COPD | IVW | 0.0648621160250242 | 0.121812403675806 | 0.532475462824373 | 0.600569192697889 | Respiratory | |
| HDL | COPD | Outlier corrected | NA | NA | NA | NA | Respiratory | No outliers found |
| APOA | COPD | IVW | 0.0648621160250242 | 0.121812403675806 | 0.532475462824373 | 0.600569192697889 | Respiratory | |
| APOA | COPD | Outlier corrected | NA | NA | NA | NA | Respiratory | No outliers found |
| ALB | COPD | IVW | 0.308369791373324 | 0.153293359362803 | 2.01163176705847 | 0.0694059820169806 | Respiratory | |
| ALB | COPD | Outlier corrected | NA | NA | NA | NA | Respiratory | No outliers found |
| HBA1C | COPD | IVW | 0.0731925010982306 | 0.0957762718336219 | 0.764202862535485 | 0.452865478052801 | Respiratory | |
| HBA1C | COPD | Outlier corrected | NA | NA | NA | NA | Respiratory | No outliers found |
| DBP | HYP | IVW | 0.50038173068555 | 0.220917888242743 | 2.2650122842734 | 0.0641052792228053 | Cardiovascular | |
| DBP | HYP | Outlier corrected | 0.590118360243641 | 0.188515126206575 | 3.13035018525245 | 0.0351733716947598 | Cardiovascular | |
| BMI | HYP | IVW | 0.50038173068555 | 0.220917888242743 | 2.2650122842734 | 0.0641052792228053 | Cardiovascular | |
| BMI | HYP | Outlier corrected | 0.590118360243641 | 0.188515126206575 | 3.13035018525245 | 0.0351733716947598 | Cardiovascular | |
| GGT | HYP | IVW | 0.665495572931956 | 0.143420300714093 | 4.64017694579107 | 0.000126339437923976 | Cardiovascular | |
| GGT | HYP | Outlier corrected | 0.651783030089582 | 0.0637562450924826 | 10.2230460583764 | 3.68468825771915e-09 | Cardiovascular | |
| BMI | ISC | IVW | 0.348139735928573 | 0.0827441935104566 | 4.20742194900453 | 0.00563922879181839 | Cardiovascular | |
| BMI | ISC | Outlier corrected | NA | NA | NA | NA | Cardiovascular | No outliers found |
| HDL | ISC | IVW | -0.240608183560392 | 0.107117548338056 | -2.24620696882502 | 0.0367757511687747 | Cardiovascular | |
| HDL | ISC | Outlier corrected | -0.298988067439012 | 0.0938935971477633 | -3.18432860729028 | 0.00513636491479101 | Cardiovascular | |
| CRP | ISC | IVW | -0.0553183411606804 | 0.0788116698059177 | -0.701905457616973 | 0.496126997713179 | Cardiovascular | |
| CRP | ISC | Outlier corrected | -0.128189538535504 | 0.0463266887796709 | -2.76707750785237 | 0.0198867843237717 | Cardiovascular | |
| DBP | ISC | IVW | 0.722930063872132 | 0.28939468418369 | 2.49807651412581 | 0.0878555314101001 | Cardiovascular | |
| DBP | ISC | Outlier corrected | NA | NA | NA | NA | Cardiovascular | No outliers found |
| GGT | ISC | IVW | 0.071207591623857 | 0.0728952002765418 | 0.976848837148639 | 0.337646083087221 | Cardiovascular | |
| GGT | ISC | Outlier corrected | -0.00730831929816284 | 0.0861674669897329 | -0.0848152969267816 | 0.933142192367804 | Cardiovascular | |
| BMI | MYO | IVW | 0.531330948167135 | 0.18549496155126 | 2.86439558101046 | 0.028636380890586 | Cardiovascular | |
| BMI | MYO | Outlier corrected | NA | NA | NA | NA | Cardiovascular | No outliers found |
| GGT | MYO | IVW | 0.0111754696260684 | 0.0650131355961632 | 0.171895564236221 | 0.864903540874595 | Cardiovascular | |
| GGT | MYO | Outlier corrected | -0.00707689990622276 | 0.0554684335215681 | -0.127584275540628 | 0.899540979577877 | Cardiovascular | |
| ALB | MYO | IVW | -0.0436874832257716 | 0.113105989933835 | -0.386252604758846 | 0.708282288993139 | Cardiovascular | |
| ALB | MYO | Outlier corrected | NA | NA | NA | NA | Cardiovascular | No outliers found |
| BMI | OA | IVW | 0.600047167810025 | 0.0772196404991344 | 7.77065477035925 | 0.000239018261742023 | Musculoskeletal | |
| BMI | OA | Outlier corrected | NA | NA | NA | NA | Musculoskeletal | No outliers found |
| BMI | OBS | IVW | 2.05261636871821 | 0.470700426445415 | 4.36077014890115 | 0.00728498150771467 | Overweight | |
| BMI | OBS | Outlier corrected | 1.45040383506852 | 0.293957614474319 | 4.93405771326 | 0.0159622663246506 | Overweight | |
| CRP | OBS | IVW | -0.0155680643139857 | 0.064604667720745 | -0.240974295870989 | 0.814443818578481 | Overweight | |
| CRP | OBS | Outlier corrected | NA | NA | NA | NA | Overweight | No outliers found |
| SHBG | OBS | IVW | 0.128510026636892 | 0.103712016600168 | 1.23910450157696 | 0.228364029854651 | Cancer |  |
| SHBG | OBS | Outlier corrected | 0.151757815781021 | 0.0908934239726871 | 1.6696237103646 | 0.109834312862841 | Cancer |  |
| BMI | T2D | IVW | 0.957551067558105 | 0.343809974293305 | 2.7851171843584 | 0.0317816083757408 | Diabetes |  |
| BMI | T2D | Outlier corrected | 0.962764769295617 | 0.15172277547741 | 6.34555205219642 | 0.00791654391549401 | Diabetes |  |
| HBA1C | T2D | IVW | 0.431404566007888 | 0.134211422083878 | 3.2143655086098 | 0.00399450337122411 | Diabetes |  |
| HBA1C | T2D | Outlier corrected | 0.371658262605943 | 0.107020647308436 | 3.47277158149508 | 0.00313895712902237 | Diabetes | Not concordant with weighted median |
| DBP | T2D | IVW | 0.370185836986064 | 0.26250539677294 | 1.41020276739782 | 0.253279315956183 | Diabetes |  |
| DBP | T2D | Outlier corrected | NA | NA | NA | NA | Diabetes | No outliers found |
| URA | T2D | IVW | 0.00593080385863491 | 0.102492619022612 | 0.0578656679397222 | 0.955472822139657 | Diabetes |  |
| URA | T2D | Outlier corrected | NA | NA | NA | NA | Diabetes | No outliers found |

**Table S20. Concordance between polygenic risk scores obtained from target dataset (exome-based and imputed array-based summary statistics)** Spearman correlation analysis of risk scores from the IAM Frontier cohort. PRSs estimated with the summary statistics generated from the reference dataset (UK Biobank).

| **PRSs** | **Spearman correlation value (r)** | **P-value** |
| --- | --- | --- |
| BMI | 0.191991101 | 0.308049971 |
| SBP | 0.478531702 | 0.008096275 |
| DBP | 0.486095662 | 0.007047215 |
| LDL | 0.788209121 | 1.49622E-06 |
| HBA1C | 0.130144605 | 0.491452978 |
| VITD | 0.549721913 | 0.001943169 |
| ALT | 0.539043382 | 0.002451828 |
| ALB | 0.477641824 | 0.008228024 |
| ALP | 0.585761958 | 0.000838454 |
| APOA | 0.596440489 | 0.000641899 |
| APOB | 0.741045606 | 5.94719E-06 |
| AST | 0.145717464 | 0.440657324 |
| CAL | 0.270745273 | 0.147582285 |
| CHO | 0.752614016 | 3.91753E-06 |
| CREA | 0.481201335 | 0.007711765 |
| CRP | 0.690322581 | 3.88674E-05 |
| GGT | 0.750389321 | 4.23516E-06 |
| HDL | 0.639599555 | 0.000197645 |
| IGF1 | 0.33971079 | 0.066828507 |
| PHOS | 0.353948832 | 0.05566903 |
| SHBG | 0.728587319 | 9.50634E-06 |
| TBIL | 0.846496107 | 7.42457E-07 |
| TPROT | 0.511012236 | 0.00437066 |
| TRIG | 0.434927697 | 0.017101152 |
| URA | -0.224471635 | 0.232063203 |
| URT | 0.52080089 | 0.003589996 |

**Table S21. Correlation between PRSs from the target cohort (exome-based summary statistics) and clinical measurements.** Spearman correlation analysis between risk scores and measurements from the IAM Frontier cohort. PRSs estimated with the summary statistics generated from the reference dataset (UK Biobank).

| **Measurement** | **Spearman correlation value (r)** | **P-value** |
| --- | --- | --- |
| ALB | 0.136698303 | 0.471337294 |
| ALP | 0.077737 | 0.683046281 |
| ALT | 0.126573993 | 0.505088597 |
| APOA | 0.366874525 | 0.046127745 |
| APOB | 0.617336187 | 0.000278945 |
| AST | 0.000892163 | 0.996266768 |
| BMI | -0.179087875 | 0.34217654 |
| CAL | 0.254485035 | 0.174745871 |
| CHO | 0.334445936 | 0.070852755 |
| CREA | 0.102849533 | 0.588624037 |
| CRP | 0.376015132 | 0.040574721 |
| DBP | 0.313014461 | 0.092436294 |
| GGT | 0.416909814 | 0.021907714 |
| HBA1C | -0.081450989 | 0.668737715 |
| HDL | 0.293698625 | 0.115194676 |
| IGF1 | 0.278241557 | 0.136536085 |
| LDL | 0.432973637 | 0.016852464 |
| PHOS | 0.178197998 | 0.344612479 |
| SBP | 0.366852058 | 0.046888988 |
| SHBG | 0.279038725 | 0.135369553 |
| TBIL | 0.347429369 | 0.059948867 |
| TPROT | 0.178792803 | 0.344493342 |
| TRIG | 0.402759245 | 0.027336422 |
| URA | 0.103206511 | 0.587323767 |
| URT | 0.000222469 | 1 |
| VITD | 0.040266963 | 0.832531759 |

**Table S22 Correlation between PRSs from the target cohort (imputed array-based summary statistics) and clinical measurements.** Spearman correlation analysis between risk scores and measurements from the IAM Frontier cohort. PRSs estimated with the summary statistics generated from the reference dataset (UK Biobank).

| **Measurement** | **Spearman correlation value (r)** | **P-value** |
| --- | --- | --- |
| ALB | 0.457154981 | 0.011091466 |
| ALP | 0.342354639 | 0.064042322 |
| ALT | 0.328468425 | 0.076362524 |
| APOA | 0.345503194 | 0.061477728 |
| APOB | 0.369645063 | 0.044384293 |
| AST | -0.00869859 | 0.963612791 |
| BMI | -0.082091212 | 0.665221389 |
| CAL | -0.12612831 | 0.506601488 |
| CHO | 0.144859817 | 0.445011612 |
| CREA | 0.343277013 | 0.063282527 |
| CRP | 0.471020139 | 0.008609463 |
| DBP | 0.034482759 | 0.856447839 |
| GGT | 0.413340763 | 0.023185254 |
| HBA1C | 0.196506075 | 0.297984572 |
| HDL | 0.248942428 | 0.184649909 |
| IGF1 | 0.1351141 | 0.476539604 |
| LDL | 0.180442764 | 0.339985549 |
| PHOS | -0.146607341 | 0.437844892 |
| SBP | 0.29432703 | 0.114442026 |
| SHBG | 0.398531385 | 0.029155937 |
| TBIL | 0.466058359 | 0.009437411 |
| TPROT | 0.387309909 | 0.034466775 |
| TRIG | 0.097908325 | 0.606749587 |
| URA | 0.145203965 | 0.443919252 |
| URT | 0.176863181 | 0.348286237 |
| VITD | -0.061179088 | 0.747446977 |

**Table S23. Associated PRS-genes from the generated tissue-specific networks mapped from the Cardiovascular Disease Knowledge Portal.**

| **Gene** | **CVD KP Group** | **Phenotypes** | **Huge Score** | **Evidence** |
| --- | --- | --- | --- | --- |
| AARS1 | CARDIOVASCULAR | PulsePress, DescAortaDiam, SBP, AscAortaDiam, AscAortaDiamInd | 3, 3, 3, 3, 3 | Moderate, Moderate, Moderate, Moderate, Moderate |
| AARS1 | LIPIDS | ApoB, CHOL, LDL, TG, nonHDL | 3, 3, 3, 3, 3 | Moderate, Moderate, Moderate, Moderate, Moderate |
| AK2 | LIPIDS | LDL, CHOL | 3, 3 | Moderate, Moderate |
| APOH | CARDIOVASCULAR | CRP, CK, PulseRate, DBP, PulsePress, DCM_broad, DCM, LVESVI, LVESV, LVEF, HR, SBP | 350, 45, 45, 5.82, 3, 3, 3, 3, 3, 3, 3, 3 | Compelling, Very strong, Very strong, Moderate, Moderate, Moderate, Moderate, Moderate, Moderate, Moderate, Moderate, Moderate |
| APOH | LIPIDS | LDL, CHOL, LipoproteinA, ApoB, TG, TGnonT2D, nonHDL, Dyslipid | 2105.12, 902.78, 350, 350, 350, 350, 45, 3 | Compelling, Compelling, Compelling, Compelling, Compelling, Compelling, Very strong, Moderate |
| ATIC | CARDIOVASCULAR | MI, SBP, PulsePress, CAD | 3, 3, 3, 3 | Moderate, Moderate, Moderate, Moderate |
| ATIC | LIPIDS | LDL, ApoB, CHOL, nonHDL | 3, 3, 3, 3 | Moderate, Moderate, Moderate, Moderate |
| ATP5F1B | CARDIOVASCULAR | PulseRate, HYPERTENSION, CRP, DBP | 3, 3, 3, 3 | Moderate, Moderate, Moderate, Moderate |
| ATP5F1B | LIPIDS | nonHDL, TG, TGnonT2D | 3, 3, 3 | Moderate, Moderate, Moderate |
| BUD13 | CARDIOVASCULAR | MI, AbAA, DBP, PulsePress, CAD, SBP, HYPERTENSION, DescAortaDiam | 20.25, 20, 3, 3, 3, 3, 3, 3 | Strong, Strong, Moderate, Moderate, Moderate, Moderate, Moderate, Moderate |
| BUD13 | LIPIDS | CHOL, Dyslipid, TGnonT2D, TGtoHDL, LDL, TG, ApoB, HDL, nonHDL, VLDLchol, ApoA, TGinT2D, FAw6, PUFA, n6FA182, XXLVLDLpart, RemnantC, HDL2chol, ApoA1, MUFA, SFA | 45, 45, 45, 45, 45, 45, 20, 20, 20, 20, 20, 20, 3, 3, 3, 3, 3, 3, 3, 3, 3 | Very strong, Very strong, Very strong, Very strong, Very strong, Very strong, Strong, Strong, Strong, Strong, Strong, Strong, Moderate, Moderate, Moderate, Moderate, Moderate, Moderate, Moderate, Moderate, Moderate |
| CA12 | CARDIOVASCULAR | PulseRate, PulsePress | 3, 3 | Moderate, Moderate |
| CA12 | LIPIDS | nonHDL, TGtoHDL, ApoA, TGnonT2D, LDL, HDL, TG, CHOL, ApoB | 3, 3, 3, 3, 3, 3, 3, 3, 3 | Moderate, Moderate, Moderate, Moderate, Moderate, Moderate, Moderate, Moderate, Moderate |
| CCT7 | CARDIOVASCULAR | SBP, DBP | 3.34, 3 | Moderate, Moderate |
| CCT8 | CARDIOVASCULAR | HF, CAD, DCM, CK, DCM_broad, PulsePress | 3, 3, 3, 3, 3, 3 | Moderate, Moderate, Moderate, Moderate, Moderate, Moderate |
| CCT8 | LIPIDS | HDL | 3 | Moderate |
| CDC6 | CARDIOVASCULAR | VaricoseVeins | 3 | Moderate |
| CDC6 | LIPIDS | HDL | 3 | Moderate |
| CELSR2 | CARDIOVASCULAR | CRP, AorticStenosis, AbAA, MI, CAD, HF | 45, 45, 45, 45, 45, 3 | Very strong, Very strong, Very strong, Very strong, Very strong, Moderate |
| CELSR2 | LIPIDS | TG, HDL, Dyslipid, ApoA, TGtoHDL, TGnonT2D, LDL, nonHDL, CHOL, ApoB, LipoproteinA | 45, 45, 45, 45, 45, 45, 45, 20, 20, 20, 3 | Very strong, Very strong, Very strong, Very strong, Very strong, Very strong, Very strong, Strong, Strong, Strong, Moderate |
| CSE1L | CARDIOVASCULAR | DBP, SBP | 3, 3 | Moderate, Moderate |
| CSE1L | LIPIDS | CHOL, nonHDL, LDL | 3, 3, 3 | Moderate, Moderate, Moderate |
| EIF3F | CARDIOVASCULAR | DBP | 3.64 | Moderate |
| EIF4G1 | CARDIOVASCULAR | PulseRate, HYPERTENSION, HR, PulsePress, DBP | 20, 20, 3, 3, 3 | Strong, Strong, Moderate, Moderate, Moderate |
| EIF4G1 | LIPIDS | ApoA, HDL | 20, 3 | Strong, Moderate |
| ELOC | LIPIDS | LDL, nonHDL, TG, HDL, CHOL, ApoB | 45, 3, 3, 3, 3, 3 | Very strong, Moderate, Moderate, Moderate, Moderate, Moderate |
| FGFR1 | CARDIOVASCULAR | DBP, PulsePress, SBP | 3, 3, 3 | Moderate, Moderate, Moderate |
| FGFR1 | LIPIDS | TG, HDL | 45, 45 | Very strong, Very strong |
| FKBP4 | LIPIDS | ApoA, HDL | 350, 350 | Compelling, Compelling |
| GARS1 | LIPIDS | LDL, CHOL, TG | 3, 3, 3 | Moderate, Moderate, Moderate |
| GNA11 | CARDIOVASCULAR | SBP, DBP | 45, 45 | Very strong, Very strong |
| GNA11 | LIPIDS | TG | 45 | Very strong |
| HSPD1 | LIPIDS | CHOL | 3 | Moderate |
| LDLR | CARDIOVASCULAR | CAD, MI, PVD, HF, HYPERTENSION, DBP, DPAcmInd, PulseRate, PAcmInd, PulsePress, AbAA, AscAortaStrain, SBP, HR, PAtoARsys, PAcm, DescAortaStrain | 6960, 1044, 348, 45, 34.86, 3.17, 3, 3, 3, 3, 3, 3, 3, 3, 3, 3, 3 | Compelling, Compelling, Extreme, Very strong, Very strong, Moderate, Moderate, Moderate, Moderate, Moderate, Moderate, Moderate, Moderate, Moderate, Moderate, Moderate, Moderate |
| LDLR | LIPIDS | ApoB, LDL, CHOL, IDLchol, IDLpart, Dyslipid, nonHDL, TGtoHDL, ApoA, TG, LipoproteinA, HDL, TGnonT2D | 6960, 4823.07, 762.81, 350, 350, 45, 20, 3, 3, 3, 3, 3, 3 | Compelling, Compelling, Compelling, Compelling, Compelling, Very strong, Strong, Moderate, Moderate, Moderate, Moderate, Moderate, Moderate |
| MCM4 | CARDIOVASCULAR | HR, PulseRate | 3, 3 | Moderate, Moderate |
| MCM5 | CARDIOVASCULAR | CK | 3 | Moderate |
| MCM5 | LIPIDS | CHOL, nonHDL, LDL, ApoB | 3, 3, 3, 3 | Moderate, Moderate, Moderate, Moderate |
| MCM7 | CARDIOVASCULAR | DBP, PulseRate, CRP, HYPERTENSION, HR, CAD | 20, 20, 3, 3, 3, 3 | Strong, Strong, Moderate, Moderate, Moderate, Moderate |
| MCM7 | LIPIDS | CHOL, ApoB, LDL, nonHDL | 20, 20, 20, 3 | Strong, Strong, Strong, Moderate |
| NOP56 | LIPIDS | CHOL | 45 | Very strong |
| NUDC | CARDIOVASCULAR | DBP, HYPERTENSION, CAD, CRP, SBP | 78.42, 3.6, 3, 3, 3 | Very strong, Moderate, Moderate, Moderate, Moderate |
| NUDC | LIPIDS | LipoproteinA, HDL, ApoA, CHOL, nonHDL, LDL, TG, TGnonT2D, ApoB, TGtoHDL | 45, 3, 3, 3, 3, 3, 3, 3, 3, 3 | Very strong, Moderate, Moderate, Moderate, Moderate, Moderate, Moderate, Moderate, Moderate, Moderate |
| PA2G4 | CARDIOVASCULAR | DBP, SBP | 3, 3 | Moderate, Moderate |
| PA2G4 | LIPIDS | HDL, TG | 3, 3 | Moderate, Moderate |
| PHB1 | CARDIOVASCULAR | SBP, CAD, CRP, HYPERTENSION, DBP, MI | 45, 45, 3, 3, 3, 3 | Very strong, Very strong, Moderate, Moderate, Moderate, Moderate |
| PHB1 | LIPIDS | TG, HDL, TGtoHDL, ApoB, TGnonT2D | 3, 3, 3, 3, 3 | Moderate, Moderate, Moderate, Moderate, Moderate |
| PLCG1 | CARDIOVASCULAR | HR, CRP, DBP, PulseRate, CAD | 20, 20, 20, 20, 3 | Strong, Strong, Strong, Strong, Moderate |
| PLCG1 | LIPIDS | nonHDL, CHOL, ApoB, TG, LDL, TGnonT2D, HDL | 45, 45, 20, 20, 20, 3, 3 | Very strong, Very strong, Strong, Strong, Strong, Moderate, Moderate |
| POC5 | CARDIOVASCULAR | AscAortaDiamInd, DBP, PulseRate, PulsePress, HYPERTENSION, CAD, HR | 350, 350, 350, 350, 4.16, 3, 3 | Compelling, Compelling, Compelling, Compelling, Moderate, Moderate, Moderate |
| POC5 | LIPIDS | HDL, CHOL, ApoB, LDL, nonHDL, Dyslipid | 374.92, 20, 20, 20, 20, 3 | Compelling, Strong, Strong, Strong, Strong, Moderate |
| PRMT1 | LIPIDS | LDL, nonHDL, HDL, TGnonT2D, ApoA, ApoB, TG, CHOL | 3, 3, 3, 3, 3, 3, 3, 3 | Moderate, Moderate, Moderate, Moderate, Moderate, Moderate, Moderate, Moderate |
| PSMD14 | CARDIOVASCULAR | PulsePress, HYPERTENSION, DBP, SBP | 3, 3, 3, 3 | Moderate, Moderate, Moderate, Moderate |
| PTPRF | CARDIOVASCULAR | CRP, HR, PulsePress, DBP, SBP, PulseRate, HYPERTENSION | 45, 3, 3, 3, 3, 3, 3 | Very strong, Moderate, Moderate, Moderate, Moderate, Moderate, Moderate |
| PTPRF | LIPIDS | HDL | 3 | Moderate |
| RABEPK | CARDIOVASCULAR | SBP, PulsePress | 20, 20 | Strong, Strong |
| RANBP1 | CARDIOVASCULAR | HR, HYPERTENSION, SBP, PulseRate, PulsePress | 45, 3.28, 3, 3, 3 | Very strong, Moderate, Moderate, Moderate, Moderate |
| RANBP1 | LIPIDS | LDL | 3 | Moderate |
| RUVBL2 | CARDIOVASCULAR | SBP, DBP, PulsePress | 3, 3, 3 | Moderate, Moderate, Moderate |
| RUVBL2 | LIPIDS | LDL, CHOL, HDL, ApoB | 3.03, 3.02, 3, 3 | Moderate, Moderate, Moderate, Moderate |
| SARS1 | CARDIOVASCULAR | CAD, AbAA, AorticStenosis, CRP, HF, MI | 3, 3, 3, 3, 3, 3 | Moderate, Moderate, Moderate, Moderate, Moderate, Moderate |
| SARS1 | LIPIDS | CHOL, LDL, ApoB, nonHDL, TGtoHDL, LipoproteinA, HDL, ApoA, TGnonT2D, Dyslipid, TG | 20, 20, 20, 20, 3, 3, 3, 3, 3, 3, 3 | Strong, Strong, Strong, Strong, Moderate, Moderate, Moderate, Moderate, Moderate, Moderate, Moderate |
| SMARCA4 | CARDIOVASCULAR | CAD, MI, AbAA, AscAortaStrain, PAcmInd, SBP, DBP, PulseRate, HR, HF, PAtoARsys, PulsePress, DescAortaStrain, DPAcmInd, PAcm, HYPERTENSION | 45, 45, 45, 3, 3, 3, 3, 3, 3, 3, 3, 3, 3, 3, 3, 3 | Very strong, Very strong, Very strong, Moderate, Moderate, Moderate, Moderate, Moderate, Moderate, Moderate, Moderate, Moderate, Moderate, Moderate, Moderate, Moderate |
| SMARCA4 | LIPIDS | ApoB, LipoproteinA, CHOL, nonHDL, LDL, IDLpart, IDLchol, TGtoHDL, TG, HDL, TGnonT2D, ApoA, Dyslipid | 45, 45, 45, 45, 20, 3, 3, 3, 3, 3, 3, 3, 3 | Very strong, Very strong, Very strong, Very strong, Strong, Moderate, Moderate, Moderate, Moderate, Moderate, Moderate, Moderate, Moderate |
| SNRPA1 | CARDIOVASCULAR | PulsePress, DescAortaDisten, DBP | 3, 3, 3 | Moderate, Moderate, Moderate |
| SNRPA1 | LIPIDS | LDL, CHOL, TGnonT2D, TG, ApoB, ApoA, HDL | 3, 3, 3, 3, 3, 3, 3 | Moderate, Moderate, Moderate, Moderate, Moderate, Moderate, Moderate |
| SRM | CARDIOVASCULAR | PulsePress | 3 | Moderate |
| SRM | LIPIDS | HDL | 3.12 | Moderate |
| TOMM40 | CARDIOVASCULAR | CRP, PulseRate, HR, cIMTmean, HYPERTENSION, CAD, MI, SBP, cIMTmax, PulsePress, AAC, AbAA, CAC, cIMT | 12892.5, 3, 3, 3, 3, 3, 3, 3, 3, 3, 3, 3, 3, 3 | Compelling, Moderate, Moderate, Moderate, Moderate, Moderate, Moderate, Moderate, Moderate, Moderate, Moderate, Moderate, Moderate, Moderate |
| TOMM40 | LIPIDS | ApoB, SM, IDLchol, IDLpart, CHOL, LDL, TG, HDL, TGtoHDL, nonHDL, TGnonT2D, RemnantC, TGinT2D, ApoA, LipoproteinA, ApoA1, Dyslipid, LDL_CALCULATED | 6960, 45, 45, 45, 45, 20.02, 20, 20, 20, 20, 3, 3, 3, 3, 3, 3, 3, 3 | Compelling, Very strong, Very strong, Very strong, Very strong, Strong, Strong, Strong, Strong, Strong, Moderate, Moderate, Moderate, Moderate, Moderate, Moderate, Moderate, Moderate |
| TUBG1 | CARDIOVASCULAR | CRP, CAD, VaricoseVeins, PulsePress | 3, 3, 3, 3 | Moderate, Moderate, Moderate, Moderate |
| TUBG1 | LIPIDS | TGtoHDL, ApoA, nonHDL, TGnonT2D, ApoB, TG, LDL, CHOL, HDL | 3, 3, 3, 3, 3, 3, 3, 3, 3 | Moderate, Moderate, Moderate, Moderate, Moderate, Moderate, Moderate, Moderate, Moderate |
| VARS1 | CARDIOVASCULAR | SBP, DBP, CRP, PulsePress, DescAortaDiam, CAD, HYPERTENSION | 350, 20, 20, 20, 3, 3, 3 | Compelling, Strong, Strong, Strong, Moderate, Moderate, Moderate |
| VARS1 | LIPIDS | CHOL, ApoA, nonHDL, TG, LDL, HDL, ApoB, TGtoHDL, TGnonT2D | 668.93, 20, 20, 20, 10.19, 3, 3, 3, 3 | Compelling, Strong, Strong, Strong, Strong, Moderate, Moderate, Moderate, Moderate |
| XRCC6 | CARDIOVASCULAR | CRP, PulsePress | 3, 3 | Moderate, Moderate |
| XRCC6 | LIPIDS | CHOL, LDL, HDL | 3, 3, 3 | Moderate, Moderate, Moderate |
| YARS1 | LIPIDS | HDL | 3 | Moderate |

**References**

1. E. J. Orliac, D. T. Banos, S. E. Ojavee, K. Läll, R. Mägi, P. M. Visscher, M. R. Robinson, Improving GWAS discovery and genomic prediction accuracy in biobank data. *Proc. Natl. Acad. Sci. U. S. A.* **119**, 1–8 (2022).

2. R. J. Carroll, L. Bastarache, J. C. Denny, R PheWAS: Data analysis and plotting tools for phenome-wide association studies in the R environment. *Bioinformatics* **30**, 2375–2376 (2014).

3. G. Hemani, J. Zheng, B. Elsworth, K. H. Wade, V. Haberland, D. Baird, C. Laurin, S. Burgess, J. Bowden, R. Langdon, V. Y. Tan, J. Yarmolinsky, H. A. Shihab, N. J. Timpson, D. M. Evans, C. Relton, R. M. Martin, G. Davey Smith, T. R. Gaunt, P. C. Haycock, The MR-base platform supports systematic causal inference across the human phenome. *Elife* **7**, 1–29 (2018).

4. J. Bowden, F. Del Greco M, C. Minelli, G. Davey Smith, N. Sheehan, J. Thompson, A framework for the investigation of pleiotropy in two-sample summary data Mendelian randomization. *Stat. Med.* **36**, 1783–1802 (2017).

5. M. Verbanck, C. Y. Chen, B. Neale, R. Do, Detection of widespread horizontal pleiotropy in causal relationships inferred from Mendelian randomization between complex traits and diseases. *Nat. Genet.* **50**, 693–698 (2018).
