# Supplementary material for: Transforming polygenic risk prediction: functional annotation and digital twin modeling with whole-exome sequencing
Source: Research Square preprint supplement (doi:10.21203/rs.3.rs-6169446/v1), 2025-03-10
Supplement: Supplementary file 2 [file 2c7fe8168c3ebc4f93765da9.xlsx]

## Sheet: Description
Supplementary Data 6	Supplementary information on polygenic risk modeling
Table S1	Performances of polygenic risk scores of the clinical biomarker measurements obtained from the exome-based reference dataset. Summary results for the exome-based training set (UK Biobank; N=9,473). Association analysis using linear regression via Bootstrapping (rep=100). Models were adjusted for age, sex, and the 40 principal components obtained from the population structure analysis. Explained v…
Table S2	Performances of polygenic risk scores of the clinical biomarker measurements obtained from the imputed-array based reference dataset. Summary results for the imputed-array training set (UK Biobank; N=9,473). Association analysis using linear regression via Bootstrapping (rep=100). Models were adjusted for age, sex, and the 40 principal components obtained from the population structure analysis. E…

## Sheet: Table S1
Measurements	Null model (covariates only)				LDpred2-infinitesimal				LDpred2-grid				LDpred2-automatic				lassosum2				PRSice2				RapidoPGS				PRS-CS
	R2	SD	LCI (95%)	UCI (95%)	R2	SD	LCI (95%)	UCI (95%)	R2	SD	LCI (95%)	UCI (95%)	R2	SD	LCI (95%)	UCI (95%)	R2	SD	LCI (95%)	UCI (95%)	R2	SD	LCI (95%)	UCI (95%)	R2	SD	LCI (95%)	UCI (95%)	R2	SD	LCI (95%)	UCI (95%)
CHO	0.0281971	0.00331354	0.0216948	0.0346994	0.014556	0.00514488	0.00445958	0.0246516	0.0625444	0.00657754	0.0496371	0.0754518	0.0632026	0.0066803	0.0500936	0.0763116	0.0215362	0.00539011	0.010959	0.0321134	0.0521308	0.00636834	0.039634	0.0646277	0.0509224	0.00603217	0.0390853	0.0627596	0.042389	0.00610443	0.03041	0.054368
LDL	0.0217946	0.00271202	0.0164727	0.0271165	0.0224693	0.00465473	0.0133352	0.0316035	0.0853229	0.00674884	0.0720794	0.0985665	0.0857559	0.00651834	0.0729647	0.0985471	0.0370055	0.00557554	0.0260644	0.0479466	0.0711567	0.00627226	0.0588484	0.083465	0.0698853	0.0059177	0.0582728	0.0814979	0.0614672	0.0059696	0.0497528	0.0731858
HDL	0.157613	0.00634351	0.145165	0.170061	0.0217858	0.00931631	0.00350399	0.0400675	0.0543471	0.00964401	0.0354222	0.0732719	0.0538508	0.00997335	0.0342797	0.0734219	0.0287872	0.00962678	0.00989621	0.0476783	0.0465562	0.00970372	0.0275142	0.0655982	0.0367582	0.0096018	0.0179613	0.0556002	0.0198204	0.0926725	0.00163486	0.0380059
TRIG	0.0523242	0.00459415	0.0433089	0.0613395	0.00918489	0.00652372	-0.00361687	0.0219867	0.0327411	0.00713227	0.0187451	0.0467371	0.0327762	0.00686646	0.0193019	0.0462506	0.0105037	0.00664175	-0.00252967	0.0235371	0.0293386	0.00682571	0.0159443	0.042733	0.0206915	0.0067247	0.00749532	0.0338876	0.0168206	0.00666326	0.00374503	0.0298962
APOA	0.148695	0.00635902	0.136217	0.161174	0.0176219	0.00916751	-0.000367871	0.0356117	0.047532	0.00986385	0.0281757	0.0668882	0.0480358	0.00923642	0.0299107	0.0661608	0.0217993	0.00947371	0.00320862	0.0403899	0.0387828	0.00985563	0.0194427	0.0581229	0.0304203	0.00946653	0.0118438	0.0489969	0.0206162	0.009352	0.00226435	0.038968
APOB	0.028052	0.00330866	0.0215592	0.0345447	0.0407752	0.00582253	0.0293494	0.052201	0.129038	0.00766519	0.106862	0.136946	0.121678	0.00753255	0.106896	0.136459	0.0762247	0.00660665	0.0632602	0.0891891	0.102754	0.00753338	0.0879707	0.117537	0.104262	0.00749706	0.0895504	0.118974	0.0810751	0.00712405	0.0670953	0.0950549
CRP	0.0136916	0.00222539	0.00927218	0.0180061	0.00615187	0.00354393	-0.000802531	0.0131063	0.0130361	0.00356738	0.00603572	0.0200365	0.0120796	0.00356218	0.00508938	0.0190698	0.00711922	0.0035579	0.000137401	0.0141011	0.00562057	0.00335746	-0.000967918	0.0122091	0.00796255	0.00339245	0.0013054	0.0146197	0.00247903	0.00309164	-0.00358781	0.00854588
SBP	0.159074	0.00652552	0.146269	0.171879	0.00754588	0.00959932	-0.0112913	0.026383	0.0125114	0.00968498	-0.00649383	0.0315166	0.0134394	0.00956192	-0.00532432	0.0322032	0.00767177	0.0100219	-0.0119946	0.0273381	0.0089981	0.00960958	-0.00985918	0.0278554	0.00307574	0.00953965	-0.0154431	0.0217958	0.00542546	0.00923519	-0.0126971	0.0235481
DBP	0.0732875	0.00507595	0.0633267	0.0832482	0.00959276	0.0073559	-0.00484203	0.0240275	0.0124083	0.00751617	-0.00234097	0.0271576	0.0123887	0.00763723	-0.00259815	0.0273755	0.0100095	0.00735745	-0.00442838	0.0244473	0.00913859	0.00741064	-0.00540362	0.0236808	0.0058731	0.0072447	-0.00834347	0.0200897	0.00346641	0.00721039	-0.0106828	0.0176157
CREA	0.298369	0.0196987	0.259713	0.337025	0.00728978	0.0270946	-0.0458791	0.0604587	0.0191016	0.0273127	-0.0344953	0.0726985	0.0193982	0.0294629	-0.0384182	0.0772145	0.00965056	0.0296799	-0.0485916	0.0678927	0.0123864	0.0291165	-0.0447502	0.0695229	0.0116072	0.0283242	-0.044421	0.0667424	0.00511694	0.0288452	-0.0514873	0.0617212
TPROT	0.0135608	0.00213548	0.00937027	0.0177513	0.015483	0.00386895	0.0078908	0.0230752	0.0244366	0.00413405	0.0163242	0.032549	0.0239222	0.00405478	0.0159654	0.0318791	0.0163434	0.00391576	0.00865933	0.0240275	0.0158556	0.00392856	0.00814648	0.0235648	0.00630985	0.00347989	-0.000518893	0.0131386	0.00542608	0.00332493	-0.00109856	0.0119507
PHOS	0.080577	0.00522945	0.0703151	0.09039	0.00367952	0.00755789	-0.0111516	0.0185107	0.0137191	0.00767135	-0.00133468	0.0287729	0.0138427	0.0075147	-0.000903742	0.0285891	0.00415664	0.00789364	-0.0113334	0.0196467	0.010833	0.00785801	-0.00458708	0.0262531	0.00662504	0.00745151	-0.00799736	0.0212474	0.00582192	0.00757942	-0.0090515	0.0206953
URA	0.0770709	0.00518196	0.0669021	0.0872397	0.00268937	0.00747486	-0.0119789	0.0173576	0.00429772	0.00746103	-0.0103434	0.0189388	0.00488797	0.00781085	-0.0104396	0.0202155	0.00320333	0.00719587	-0.0109141	0.0173241	0.00273558	0.00765238	-0.012281	0.0177522	0.00201962	0.00717209	-0.0120545	0.0160937	0.000999423	0.00714979	-0.0130309	0.0150298
URT	0.294123	0.00762592	0.279159	0.309088	0.0108492	0.0108492	-0.00607146	0.0365083	0.0420186	0.010836	0.0207546	0.0632825	0.0410161	0.0108064	0.0198102	0.0622221	0.0196588	0.0111118	-0.00214635	0.041464	0.021188	0.0111733	-0.000737839	0.0431137	0.0281343	0.0113485	0.00586472	0.0504038	0.0147762	0.0109372	-0.00668635	0.0362388
ALB	0.0370583	0.00352959	0.0301321	0.0439846	0.0103898	0.00534962	-0.000108	0.0208876	0.0167377	0.0055498	0.00584707	0.0276287	0.0169314	0.00580361	0.00554257	0.0283199	0.0104843	0.00540631	-0.000124679	0.0210934	0.0106156	0.00567797	-0.000526487	0.0217577	0.00705172	0.00544044	-0.00362429	0.0177277	0.00588465	0.00552706	-0.00496133	0.0167306
TBIL	0.0635816	0.00486449	0.0540358	0.0731274	0.0911752	0.00816048	0.0751615	0.107189	0.244204	0.00907756	0.226391	0.262018	0.244658	0.00918295	0.226638	0.262678	0.183553	0.00877934	0.166324	0.200781	0.194759	0.00889256	0.177309	0.21221	0.192266	0.00857661	0.175436	0.209096	0.0320782	0.00765021	0.0170659	0.0470905
GGT	0.0407369	0.00412891	0.0326346	0.0488393	0.0136401	0.00648485	0.000914587	0.0263656	0.0222355	0.00675851	0.00897297	0.035498	0.0209383	0.00653751	0.00810951	0.0337672	0.0151772	0.00659764	0.00223043	0.0281241	0.0169409	0.0069072	0.00338666	0.0304952	0.0147744	0.00663889	0.00174667	0.0278022	0.0100909	0.00666005	-0.00297836	0.0231602
ALT	0.0669376	0.00577866	0.0555979	0.0782773	0.00602626	0.00810968	-0.00988771	0.0219402	0.0121016	0.00863642	-0.00484599	0.0290492	0.0128109	0.00835412	-0.0035827	0.0292046	0.00658601	0.00806672	-0.00924365	0.0224157	0.0108144	0.00827302	-0.00542013	0.0270488	0.00902377	0.0081458	-0.00696107	0.0250086	0.00998395	0.00830912	-0.00632138	0.0262893
AST	0.0390399	0.00488075	0.0294622	0.0486176	0.00724313	0.0071843	-0.00685491	0.0213412	0.013066	0.00765009	-0.00194609	0.0280781	0.0127137	0.00738703	-0.0017822	0.0272095	0.00750193	0.00718891	-0.00660517	0.021609	0.00941703	0.00747298	-0.00524752	0.0240816	0.00694409	0.00717416	-0.00713406	0.0210222	0.00603181	0.00721752	-0.00813143	0.020195
ALP	0.0454337	0.00412791	0.0373333	0.0533534	0.0276684	0.00678817	0.0143476	0.040989	0.0635855	0.00815449	0.0475836	0.0795874	0.0630021	0.00801684	0.0472703	0.0787338	0.0329735	0.00708344	0.0190734	0.0468736	0.0503311	0.00751198	0.03559	0.0650722	0.034601	0.00714962	0.020571	0.048631	0.0263703	0.00640408	0.0138033	0.0389373
VITD	0.0163388	0.00249541	0.0114419	0.0212357	0.00644536	0.00370059	-0.000816453	0.0137072	0.0229005	0.00455246	0.013967	0.031834	0.022593	0.00467677	0.0134156	0.0317704	0.00747042	0.00381877	-2.33154e-05	0.0149642	0.0209241	0.00448422	0.0121245	0.0297237	0.0212685	0.00432593	0.0127795	0.0297574	0.015784	0.00425455	0.00743513	0.0241329
CAL	0.0250327	0.00292163	0.0192995	0.0307659	0.0042867	0.0042944	-0.00414037	0.0127138	0.0144435	0.00476718	0.00508866	0.0237983	0.0142929	0.00474879	0.00497412	0.0236116	0.00424363	0.00430186	-0.00419809	0.0126853	0.0123433	0.0048018	0.00292059	0.0217661	0.00806054	0.00456764	-0.000902735	0.0170238	0.00608622	0.00455212	-0.00284659	0.015019
SHBG	0.158697	0.00589623	0.147127	0.170268	0.0113458	0.00825545	-0.00485425	0.0275458	0.0273874	0.00852378	0.0106609	0.044114	0.0268773	0.00820287	0.0107804	0.0429741	0.0148016	0.00785188	-0.000605133	0.0302097	0.0149441	0.0081298	-0.00100937	0.0308975	0.0179522	0.0082589	0.00174542	0.034159	0.0125451	0.00801917	-0.00319127	0.0282814
IGF1	0.0847223	0.00541859	0.0740892	0.0953554	0.0185462	0.00787985	0.00319166	0.0341176	0.0338548	0.00821509	0.017734	0.0499757	0.0343192	0.00810331	0.0184177	0.0502206	0.0196039	0.00817395	0.00356381	0.035644	0.0225707	0.00793274	0.00700396	0.0381374	0.016297	0.00796175	0.000673342	0.0319207	0.0119218	0.00793846	-0.00438787	0.0267701
HBA1C	0.0596014	0.00521858	0.0493608	0.0698421	0.0128422	0.0077585	-0.00237661	0.028073	0.0206157	0.00841497	0.0041027	0.0371288	0.0190036	0.00816239	0.00298621	0.035021	0.0140712	0.00759067	-0.000824331	0.0289667	0.0145078	0.0081007	-0.00138853	0.0304042	0.00892499	0.00795318	-0.00668185	0.0245318	0.00901711	0.00774495	-0.00618112	0.0242154
GLUC	0.0206099	0.00296643	0.0147888	0.0264311	0.00149412	0.00428135	-0.00690735	0.0098956	0.00561854	0.00439202	-0.0030001	0.0142372	0.0053278	0.00413971	-0.00279573	0.0134513	0.00151472	0.00404364	-0.00642028	0.00944973	0.00476261	0.00428799	-0.0036519	0.0131771	0.0034403	0.00417044	-0.00474352	0.0116241	0.00441035	0.00425665	-0.00393483	0.0127555
BMI	0.0123788	0.00204862	0.00835871	0.0163989	0.011488	0.00356271	0.00449676	0.0184793	0.0141973	0.00365398	0.0070269	0.0213676	0.0135821	0.00365294	0.00641377	0.0207504	0.0117254	0.00363365	0.0045949	0.0188558	0.0120383	0.00360605	0.00496203	0.0191146	0.00249204	0.00307786	-0.00354777	0.00853184	0.00431811	0.00325651	-0.00207227	0.0107085

## Sheet: Table S2
Measurements	Null model (covariates only)				LDpred2-infinitesimal				LDpred2-grid				LDpred2-automatic				lassosum2				PRsice2				RapidoPGS				PRS-CS
	R2	SD	LCI (95%)	UCI (95%)	R2	SD	LCI (95%)	UCI (95%)	R2	SD	LCI (95%)	UCI (95%)	R2	SD	LCI (95%)	UCI (95%)	R2	SD	LCI (95%)	UCI (95%)	R2	SD	LCI (95%)	UCI (95%)	R2	SD	LCI (95%)	UCI (95%)	R2	SD	LCI (95%)	UCI (95%)
CHO	0.0262764	0.0032151	0.0199672	0.0325855	0.00631848	0.00473836	-0.00297981	0.0156168	0.0586846	0.00623905	0.0464414	0.0709277	0.053852	0.00627064	0.0415468	0.0661571	0.0547503	0.00642992	0.0421326	0.067368	0.0475268	0.00630864	0.0351471	0.0599065	0.0345454	0.00565466	0.0234454	0.0456453	0.0181564	0.00495818	0.00842672	0.027886
LDL	0.020114	0.00261028	0.0149917	0.0252362	0.00779688	0.00408393	-0.000217184	0.015811	0.0742051	0.00616886	0.0620997	0.0863106	0.0667733	0.00612816	0.0547478	0.0787989	0.0691955	0.00622061	0.0569885	0.0814025	0.0581766	0.00563758	0.0471137	0.0692394	0.0429202	0.00547419	0.032178	0.0536625	0.0253494	0.00477654	0.0159762	0.0347226
HDL	0.157545	0.00649529	0.144799	0.170291	0.0225416	0.00946591	0.00396626	0.0411169	0.0654356	0.00984642	0.0461135	0.0847576	0.0602897	0.00971591	0.0412238	0.0793557	0.0579612	0.00992551	0.038484	0.0774385	0.0384603	0.00989286	0.0190407	0.0578734	0.0258872	0.00901626	0.00819573	0.0435817	0.0260159	0.00963587	0.00710705	0.0449248
TRIG	0.0537418	0.00435475	0.0451963	0.0622873	0.0113864	0.0068337	-0.00202361	0.0247965	0.0526252	0.007636	0.0376408	0.0676096	0.0474053	0.00737293	0.0329371	0.0618736	0.0492115	0.00736074	0.0347672	0.0636557	0.039388	0.00710812	0.0254394	0.0533365	0.0319012	0.00712739	0.0179148	0.0458875	0.0127288	0.00681421	-0.000642985	0.0261006
APOA	0.148551	0.00621068	0.136364	0.160739	0.0147869	0.00917006	-0.00320786	0.0327817	0.0504088	0.00961161	0.0315475	0.06927	0.045603	0.00926747	0.027417	0.0637889	0.0434687	0.00973879	0.0243578	0.0625795	0.0370796	0.00977429	0.0116154	0.0499764	0.0216022	0.00924104	0.00346817	0.0397363	0.0197632	0.00941047	0.00129667	0.0382298
APOB	0.026042	0.00317339	0.0198147	0.0322693	0.0125327	0.00490648	0.00290454	0.0221609	0.0960328	0.00717411	0.0819548	0.110111	0.0823193	0.00688755	0.0688036	0.0958351	0.0924963	0.00690679	0.0789428	0.10605	0.0720428	0.00655589	0.0591779	0.0849077	0.050105	0.00579126	0.0387406	0.0614695	0.0326506	0.00545947	0.0219373	0.043364
CRP	0.0130591	0.00215264	0.00883489	0.0172833	0.00566662	0.00335698	-0.000920926	0.0122542	0.0172863	0.00401672	0.00940413	0.0251685	0.0150374	0.00387615	0.00743107	0.00226437	0.0150066	0.00378322	0.00758264	0.0224306	0.0128837	0.00384962	0.00532942	0.020438	0.00875996	0.00351998	0.00185255	0.0156674	0.00613347	0.00352758	-0.000788842	0.0130558
SBP	0.160863	0.00684811	0.147425	0.174301	0.00961534	0.0097908	-0.00959755	0.0288282	0.0121199	0.00993018	-0.00736651	0.0316063	0.0110094	0.00956065	-0.00775186	0.0297706	0.00959001	0.00949227	-0.00903707	0.0282171	0.00948548	0.00965017	-0.00945146	0.0284224	0.00168766	0.00948531	-0.0169258	0.0203011	0.00591639	0.0093835	-0.0124972	0.02433
DBP	0.0754082	0.00515882	0.0652848	0.0855315	0.0114091	0.00769103	-0.00368337	0.0265015	0.0136859	0.00750455	-0.00104059	0.0284124	0.0121936	0.00758047	-0.00268188	0.0270691	0.0101391	0.00743822	-0.00445722	0.0247354	0.0102638	0.00781866	-0.0050791	0.0256067	0.00287527	0.0071773	-0.011209	0.0169596	0.00222237	0.00745503	-0.0124069	0.0168517
CREA	0.297956	0.0204245	0.257876	0.338036	0.0135055	0.0286339	-0.0426839	0.0696949	0.0238737	0.0280335	-0.0311376	0.0788851	0.0203585	0.0287701	-0.0360984	0.0768153	0.0171764	0.0292273	-0.0401777	0.0745304	0.0121513	0.0271401	-0.0411068	0.0654095	0.00908404	0.0280434	-0.0459466	0.0641147	0.00465667	0.02955	-0.0533306	0.0626439
TPROT	0.0132734	0.00218978	0.00897627	0.0175704	0.0158434	0.0040018	0.00799047	0.0236963	0.0255469	0.00433813	0.0170341	0.0340598	0.0232398	0.0041698	0.0150573	0.0314224	0.0186702	0.00406262	0.010698	0.0266425	0.0161149	0.00404444	0.00817827	0.0240514	0.0100502	0.00359277	0.00299999	0.0171005	0.00845744	0.00342079	0.00174468	0.0151702
PHOS	0.08074	0.00554447	0.0698599	0.0916202	0.00441113	0.00785688	-0.0110067	0.019829	0.018809	0.00801589	0.00307908	0.0345389	0.0175549	0.00796361	0.00192761	0.0331823	0.0177613	0.00800996	0.00204308	0.0334796	0.00611169	0.00758342	-0.00876957	0.0209929	0.014294	0.00790567	-0.00121964	0.0298076	0.00999199	0.00795624	-0.00562087	0.0256048
URA	0.0789	0.00548923	0.0681283	0.0896718	0.00505914	0.00781274	-0.0102721	0.0203904	0.0128695	0.00791746	-0.00266729	0.0284063	0.0112869	0.00789531	-0.00420643	0.0267801	0.00944763	0.00735662	-0.00498856	0.0238838	0.00611169	0.00758342	-0.00876957	0.0209929	0.00763067	0.00756147	-0.00720752	0.0224688	0.00410688	0.00744638	-0.0105055	0.0187192
URT	0.291602	0.0078211	0.276255	0.030695	0.0291632	0.0110947	0.00739154	0.0509348	0.0678144	0.0109646	0.0462982	0.0893307	0.0606352	0.0112814	0.0384973	0.082773	0.0626121	0.0113499	0.0403396	0.0848846	0.0535307	0.0107344	0.0324662	0.0745952	0.036884	0.0108885	0.015517	0.058251	0.0372408	0.0108341	0.0159806	0.0585009
ALB	0.0356953	0.00374629	0.0283438	0.0430468	0.0100923	0.00568468	-0.00106294	0.0212476	0.0190516	0.00579572	0.00767846	0.0304248	0.0162576	0.00593227	0.00461647	0.0278987	0.0122007	0.00544144	0.00152277	0.0228787	0.0107606	0.00549867	-2.96499e-06	0.0215509	0.00705172	0.00544044	-0.00362429	0.0177277	0.0070706	0.00538048	-0.00348773	0.0176289
TBIL	0.063699	0.00474188	0.0543938	0.0730042	0.0669433	0.00776966	0.0516965	0.08219	0.294543	0.00916998	0.276548	0.312537	0.289924	0.089979	0.272267	0.307581	0.293895	0.00911451	0.276009	0.311781	0.232056	0.00950358	0.213407	0.0250705	0.192266	0.00857661	0.175436	0.209096	0.200811	0.00955442	0.182062	0.21956
GGT	0.0426472	0.00455091	0.0337167	0.0515776	0.012175	0.0068108	-0.00119016	0.0255401	0.0317044	0.00745219	0.0170806	0.0463281	0.0283462	0.00749973	0.0136292	0.0430632	0.0261103	0.00767402	0.0110512	0.0411693	0.019725	0.00687825	0.00622755	0.0332225	0.0147744	0.00663889	0.00174667	0.0278022	0.00712482	0.00668152	-0.0059866	0.0202362
ALT	0.0669891	0.00562834	0.0559444	0.0780339	0.00448407	0.00817359	-0.0115553	0.0205234	0.012349	0.0082368	-0.00381441	0.0285124	0.0110939	0.00813533	-0.00487043	0.0270581	0.00956861	0.00823746	-0.00676542	0.0259026	0.00770993	0.00845932	-0.00889014	0.02431	0.00902377	0.0081458	-0.00696107	0.0250086	0.00396134	0.00827381	-0.0122747	0.0201974
AST	0.0393228	0.004917	0.029674	0.0489717	0.00508733	0.00719183	-0.0090255	0.0192002	0.017493	0.00754523	0.0026867	0.0322993	0.0162558	0.00788059	0.000791361	0.0317202	0.016132	0.0077482	0.000927375	0.0313366	0.0120321	0.00787584	-0.00342295	0.0274872	0.00694409	0.00717416	-0.00713406	0.0210222	0.00670134	0.007683	-0.00837534	0.021778
ALP	0.0455614	0.00414264	0.0374321	0.0536906	0.0254827	0.00641508	0.0128941	0.0380713	0.101378	0.00934284	0.0830443	0.119712	0.0630021	0.00801684	0.0472703	0.0787338	0.0954029	0.00913879	0.0774695	0.113336	0.0721115	0.00805648	0.0563019	0.087921	0.054063	0.00740227	0.0395372	0.0685881	0.0253073	0.00662375	0.012302	0.0383053
VITD	0.0205374	0.00274972	0.0151415	0.0259333	0.00536681	0.0042186	-0.000291152	0.0136451	0.0295703	0.00502185	0.0197157	0.0394249	0.022593	0.00467677	0.0134156	0.0317704	0.0274672	0.0050287	0.0175991	0.0373352	0.0241072	0.00481789	0.0146529	0.0335616	0.0209224	0.00475557	0.0115902	0.0302543	0.0117076	0.00436905	0.00313401	0.0202811
CAL	0.0270079	0.00309797	0.0209287	0.0330872	0.00501365	0.0046127	-0.00403804	0.0140653	0.0180609	0.00510313	0.00804678	0.028075	0.0142929	0.00474879	0.00497412	0.0236116	0.0173049	0.00500201	0.00748912	0.0271204	0.0152882	0.00507072	0.00533774	0.0252387	0.00780169	0.00473725	-0.0014944	0.0170978	0.00791673	0.00471242	-0.00133064	0.0171641
SHBG	0.158962	0.00547223	0.148224	0.1697	0.0129943	0.0080282	-0.00275982	0.0287483	0.051474	0.00827817	0.0352294	0.0677186	0.0453067	0.00872429	0.0281867	0.0624267	0.0477209	0.0088815	0.0302924	0.0651494	0.038391	0.00847861	0.0217531	0.055029	0.0309636	0.0084716	0.0143394	0.0475877	0.0208239	0.00809027	0.00494804	0.0366998
IGF1	0.0810764	0.0053655	0.0705475	0.0916054	0.0196195	0.00791272	0.00409208	0.035147	0.0462047	0.00857835	0.029371	0.0630383	0.0425301	0.00848985	0.0258702	0.0591901	0.0382824	0.00863161	0.0213301	0.0552064	0.0241641	0.00801192	0.00844203	0.0398863	0.0203022	0.00796022	0.00468151	0.0359229	0.0141662	0.00785061	-0.00123934	0.0295718
HBA1C	0.0610625	0.00550007	0.0502695	0.0718555	0.00790062	0.00780784	-0.00742104	0.0232223	0.03076	0.00851187	0.0140568	0.0474632	0.0281979	0.0082044	0.0120981	0.0442978	0.0280832	0.00871777	0.010976	0.0451904	0.0169604	0.00828804	0.000696417	0.0332243	0.0121409	0.00792629	-0.00341318	0.027695	0.0105798	0.00755717	-0.00424995	0.0254095
GLUC	0.0243909	0.00292648	0.0186481	0.0301336	0.00276113	0.00433885	-0.00575318	0.0112754	0.00577968	0.00446469	-0.00298157	0.0145409	0.00346237	0.00412608	-0.00463441	0.0115592	0.00368963	0.00439294	-0.00493082	0.0123101	0.00426864	0.00461514	-0.00478784	0.0133251	0.00179335	0.00449119	-0.00701989	0.0106066	0.00170194	0.00421021	-0.00655992	0.0099638
BMI	0.0123429	0.00202079	0.00837744	0.0163084	0.0256836	0.00406841	0.0177	0.0336673	0.0344858	0.00461932	0.0254211	0.0435505	0.0317347	0.00454124	0.0228232	0.0406462	0.0249855	0.00405793	0.0170225	0.0329486	0.0244239	0.00416296	0.0162548	0.0325931	0.0069107	0.00349035	6.14513e-05	0.01376	0.0104028	0.00359056	0.00335686	0.0174486
