# Supplementary material for: Transforming polygenic risk prediction: functional annotation and digital twin modeling with whole-exome sequencing
Source: Research Square preprint supplement (doi:10.21203/rs.3.rs-6169446/v1), 2025-03-10
Supplement: Supplementary file 3 [file 3d6743b8e0837505961306b5.xlsx]

## Sheet: Description
Supplementary Data 4	Supplementary information on pathogenicity prediction (ProtVar: AlphaMissense and ESM1b)
Table S1	Pathogenicity prediction from the exome-based summary statistics.
Table S2	Pathogenicity prediction from the imputed array-based summary statistics.

## Sheet: Table S1
rsID	Ref	Alt	AlphaMissense_pathogenicity(class)	ESM1b_score	Notes	Gene	Codon_change	Strand	CADD_phred_like_score	Canonical_isoform_transcripts	MANE_transcript	Uniprot_canonical_isoform_(non_canonical)	Alternative_isoform_mappings	Protein_name	Amino_acid_position	Amino_acid_change	Consequences	Residue_function_(evidence)	Region_function_(evidence)	Protein_existence_evidence	Protein_length	Entry_last_updated	Sequence_last_updated	Protein_catalytic_activity	Protein_complex	Protein_sub_cellular_location	Protein_family	Protein_interactions_PROTEIN(gene)	Predicted_pockets(energy;per_vol;score;resids)	Predicted_interactions(chainA-chainB;a_resids;b_resids;pDockQ)	Foldx_prediction(foldxDdg;plddt)	Conservation_score	Genomic_location	Cytogenetic_band	Other_identifiers_for_the_variant	Diseases_associated_with_variant	Variants_colocated_at_residue_position	Position_in_structures
rs1137101	A	G	0.0989(BENIGN)	-5.224	N/A	LEPR	cAg/cGg	+	18.73	[ENSP00000330393.7(ENST00000349533.11)]	N/A	P48357	P48357-4;223;Gln/Arg;missense;[ENSP00000360097.1(ENST00000371058.1), ENSP00000340884.8(ENST00000344610.12)]|P48357-1;223;Gln/Arg;missense;[ENSP00000330393.7(ENST00000349533.11)]|P48357-3;223;Gln/Arg;missense;[ENSP00000360098.3(ENST00000371059.7)]|P48357-2;223;Gln/Arg;missense;[ENSP00000483390.1(ENST00000616738.4), ENSP00000360099.3(ENST00000371060.7)]	Leptin receptor	223	Gln/Arg	missense	N/A	CHAIN-Leptin receptor;Range:22-1165|TOPO_DOM-Extracellular;Range:22-839()	Evidence at protein level	1165	2024-01-24	2006-10-17	N/A	Present as a mixture of monomers and dimers (Probable)	Cell membrane;Basolateral cell membrane(Single-pass type I membrane protein)|Secreted	Belongs to the type I cytokine receptor family	P62993(GRB2);O15243(LEPROT);P48357-1(LEPR);P48357-1(LEPR);P48357-1(LEPR);P48357-3(LEPR);P0CG48(UBC)	pocket_id:1;rad_gyration:6.355244;energy_per_vol:0.396432;buriedness:0.80367;resid:20 21 22 23 24 25 26 27 36 37 38 39 40 88 89 90 91 92 93 96 97 98 99 100 101 102 103 104 175 176 212 223 224 225 226 227;mean_plddt:54.08527777777777;score:767.3112984039218|pocket_id:20;rad_gyration:4.463005;energy_per_vol:0.364299;buriedness:0.814433;resid:23 162 175 176 177 178 179 181 183 212 214 221 223 224 22…	N/A	foldxDdg:0.18658;plddt:78.03	0.376	NC_000001.11:g.65592830A>G	1p31.3	ClinGen-CA119663|ClinVar-RCV000009047;MAF:0.41574;Benign|ClinVar-RCV000281795;MAF:0.41574;Benign|ClinVar-RCV000348520;MAF:0.41574;Benign|ClinVar-RCV000518727;MAF:0.41574;Benign|ClinVar-RCV001668124;MAF:0.41574;Benign|UniProt-VAR_002705|1000Genomes-rs1137101;MAF:0.4157|ESP-rs1137101|ExAC-rs1137101|TOPMed-rs1137101|dbSNP-rs1137101|gnomAD-rs1137101	LEPTIN RECEPTOR POLYMORPHISM-(ClinVar:[RCV000009047])|Monogenic Non-Syndromic Obesity-(ClinVar:[RCV000281795])|Obesity due to leptin receptor gene deficiency-(pubmed:[28359099]ClinVar:[RCV000348520])	[Gln>Ter;NC_000001.11:g.65592829C>T;1p31.3;ClinGen-CA23920075|TOPMed-rs906184010|gnomAD-rs906184010][Gln>Leu;NC_000001.11:g.65592830A>T;1p31.3;ClinGen-CA340678382|1000Genomes-rs1137101;MAF:0.4157|ESP-rs1137101|ExAC-rs1137101|TOPMed-rs1137101|gnomAD-rs1137101]	N/A
rs11591147	G	T	0.0844(BENIGN)	-2.188	N/A	PCSK9	cGu/cUu	+	10.44	[ENSP00000303208.5(ENST00000302118.5)]	N/A	Q8NBP7	Q8NBP7-1;46;Arg/Leu;missense;[ENSP00000303208.5(ENST00000302118.5)]|A0A669KAY4;46;Arg/Leu;missense;[ENSP00000501004.1(ENST00000673726.1)]	Proprotein convertase subtilisin/kexin type 9	46	Arg/Leu	missense	N/A	PROPEP-;Range:31-152(PubMed:[12552133])	Evidence at protein level	692	2024-01-24	2011-01-11	N/A	Monomer	Cytoplasm;Secreted;Endosome;Lysosome;Cell surface;Endoplasmic reticulum;Golgi apparatus	Belongs to the peptidase S8 family	P07355(ANXA2);P01130(LDLR);P08253(MMP2);P01130(LDLR)	N/A	N/A	N/A	0.38	NC_000001.11:g.55039974G>T	1p32.3	ClinGen-CA023110|UniProt-VAR_017197|1000Genomes-rs11591147;MAF:0.00639|ESP-rs11591147|ExAC-rs11591147|TOPMed-rs11591147|dbSNP-rs11591147|gnomAD-rs11591147	N/A	[Arg>Cys;NC_000001.11:g.55039973C>T;1p32.3;ClinGen-CA036614|ClinVar-RCV000775256;MAF:7.0E-5;Variant of uncertain significance|ExAC-rs747713772|dbSNP-rs747713772|gnomAD-rs747713772][Arg>His;NC_000001.11:g.55039974G>A;1p32.3;ClinGen-CA22792102|1000Genomes-rs11591147;MAF:0.00639|ESP-rs11591147|ExAC-rs11591147|TOPMed-rs11591147|gnomAD-rs11591147]	6mv5;C16;2.1;X-ray diffraction|6e4y;C15;2.24;X-ray diffraction|6e4z;C15;2.2;X-ray diffraction
rs17360994	T	C	0.0853(BENIGN)	-1.558	N/A	KDF1	cAg/cGg	-	20	[ENSP00000319179.5(ENST00000320567.6)]	N/A	Q8NAX2	N/A	Keratinocyte differentiation factor 1	100	Gln/Arg	missense	N/A	CHAIN-Keratinocyte differentiation factor 1;Range:1-398	Evidence at protein level	398	2024-03-27	2007-05-29	N/A	N/A	Cytoplasm;Cell junction	N/A	Q03989(ARID5A);Q8TD10(MIPOL1);P78424(POU6F2)	N/A	N/A	foldxDdg:-0.224846;plddt:78.26	0.536	NC_000001.11:g.26952082T>C	1p36.11	ClinGen-CA710346|UniProt-VAR_032561|1000Genomes-rs17360994;MAF:0.04692|ESP-rs17360994|ExAC-rs17360994|TOPMed-rs17360994|dbSNP-rs17360994|gnomAD-rs17360994	N/A	[Gln>Ter;NC_000001.11:g.26952083G>A;1p36.11;ClinGen-CA710347|ExAC-rs761717950|TOPMed-rs761717950|gnomAD-rs761717950]	N/A
rs1047891	C	A	0.0854(BENIGN)	-6.211	N/A	CPS1	aCc/aAc	+	18.18	[ENSP00000233072.5(ENST00000233072.10), ENSP00000501022.1(ENST00000673711.1), ENSP00000500537.1(ENST00000673510.1), ENSP00000501073.1(ENST00000673630.1)]	N/A	P31327	P31327-2;955;Thr/Asn;missense;[ENSP00000406136.2(ENST00000451903.3)]|P31327-1;1406;Thr/Asn;missense;[ENSP00000500537.1(ENST00000673510.1), ENSP00000233072.5(ENST00000233072.10), ENSP00000501022.1(ENST00000673711.1), ENSP00000501073.1(ENST00000673630.1)]|P31327-3;1412;Thr/Asn;missense;[ENSP00000402608.2(ENST00000430249.7)]	Carbamoyl-phosphate synthase [ammonia], mitochondrial	1406	Thr/Asn	missense	N/A	CHAIN-Carbamoyl-phosphate synthase [ammonia], mitochondrial;Range:39-1500|DOMAIN-MGS-like;Range:1355-1500(PROSITE-ProRule:[PRU01202])|STRAND;Range:1406-1408(PDB:[6UEL])	Evidence at protein level	1500	2024-01-24	1998-12-15	RHEA:18029(PubMed:[23649895,24813853])	Can form homooligomers (monomers as predominant form and dimers)	Mitochondrion;Nucleus, nucleolus;Cell membrane(Peripheral membrane protein)	N/A	P10398(ARAF);P04049(RAF1);P63104(YWHAZ)	N/A	N/A	foldxDdg:0.122048;plddt:97.9	0.487	NC_000002.12:g.210675783C>A	2q34	ClinGen-CA288789|ClinVar-RCV000116832;MAF:0.28854;Benign|ClinVar-RCV000274786;MAF:0.28854;Benign|UniProt-VAR_017569;Benign|1000Genomes-rs1047891;MAF:0.2885|ESP-rs1047891|ExAC-rs1047891|TOPMed-rs1047891|dbSNP-rs1047891|gnomAD-rs1047891	Congenital hyperammonemia, type I-(pubmed:[20301396]ClinVar:[RCV000274786])	[Thr>Pro;NC_000002.12:g.210675782A>C;2q34;ClinGen-CA350440736|Ensembl-rs1574678872]	6w2j;B1406,A1406;2.62;X-ray diffraction|2yvq;A71;1.98;X-ray diffraction|5dou;A1395,C1395,B1395,D1395;2.6;X-ray diffraction|6uel;B1406,A1406;1.9;X-ray diffraction|5dot;A1395,B1395;2.4;X-ray diffraction
rs1048603	G	A	0.0574(BENIGN)	-2.769	N/A	USP40	Cgu/Ugu	-	11.84	[ENSP00000251722.6(ENST00000251722.10), ENSP00000387898.2(ENST00000427112.6)]	N/A	Q9NVE5	Q9NVE5-1;1111;Arg/Cys;missense;[ENSP00000251722.6(ENST00000251722.10), ENSP00000387898.2(ENST00000427112.6)]|A0A7I2YQ75;1112;Arg/Cys;missense;[ENSP00000502952.1(ENST00000678225.2)]|H7C0C4;79;Arg/Cys;missense;[ENSP00000394133.1(ENST00000454354.1)]	Ubiquitin carboxyl-terminal hydrolase 40	1111	Arg/Cys	missense	N/A	CHAIN-Ubiquitin carboxyl-terminal hydrolase 40;Range:1-1235	Evidence at protein level	1235	2024-01-24	2005-02-15	N/A	N/A	N/A	Belongs to the peptidase C19 family	N/A	pocket_id:87;rad_gyration:3.131422;energy_per_vol:0.31813;buriedness:0.738351;resid:1104 1107 1108 1111 1112 1113 1114 1115;mean_plddt:90.5025;score:291.3166856710917|pocket_id:89;rad_gyration:3.250853;energy_per_vol:0.300661;buriedness:0.727599;resid:1075 1087 1108 1109 1110 1111;mean_plddt:91.69666666666669;score:258.3099874082054	N/A	foldxDdg:1.72196;plddt:92.12	0.462	NC_000002.12:g.233485841G>A	2q37.1	ClinGen-CA2176364|UniProt-VAR_017124|1000Genomes-rs1048603;MAF:0.4002|ESP-rs1048603|ExAC-rs1048603|TOPMed-rs1048603|dbSNP-rs1048603|gnomAD-rs1048603	N/A	[Arg>His;NC_000002.12:g.233485840C>T;2q37.1;ClinGen-CA2176363|1000Genomes-rs572999089;MAF:2.0E-4|ExAC-rs572999089|TOPMed-rs572999089|gnomAD-rs572999089][Arg>Ser;NC_000002.12:g.233485841G>T;2q37.1;ClinGen-CA351085924|1000Genomes-rs1048603;MAF:0.4002|ESP-rs1048603|ExAC-rs1048603|TOPMed-rs1048603|gnomAD-rs1048603]	N/A
rs11676272	A	G	0.093(BENIGN)	-4.384	N/A	ADCY3	Ucc/Ccc	-	17.59	[ENSP00000260600.5(ENST00000260600.9), ENSP00000505261.1(ENST00000679454.1)]	N/A	O60266	C9J969;107;Ser/Pro;missense;[ENSP00000406153.1(ENST00000438445.1)]|O60266-1;107;Ser/Pro;missense;[ENSP00000260600.5(ENST00000260600.9), ENSP00000505261.1(ENST00000679454.1)]|A0A0A0MSC1;107;Ser/Pro;missense;[ENSP00000384484.2(ENST00000405392.6)]|C9JLX3;107;Ser/Pro;missense;[ENSP00000389799.1(ENST00000435135.5)]	Adenylate cyclase type 3	107	Ser/Pro	missense	N/A	CHAIN-Adenylate cyclase type 3;Range:1-1144|TRANSMEM-Helical;Range:105-125()	Evidence at protein level	1144	2024-01-24	2006-11-28	RHEA:15389(UniProtKB:[Q8VHH7])	N/A	Cell membrane;Cytoplasm;Cell projection, cilium;Golgi apparatus(Multi-pass membrane protein)	Belongs to the adenylyl cyclase class-4/guanylyl cyclase family	N/A	pocket_id:22;rad_gyration:4.521819;energy_per_vol:0.680047;buriedness:0.993289;resid:91 92 95 96 99 104 107 154 158 159 166 167 168 169 170 171 752 756 802 803 806 807 834 835 836 837 838 841 842 845;mean_plddt:84.67;score:929.5792838627278|pocket_id:20;rad_gyration:6.022787;energy_per_vol:0.445668;buriedness:0.857143;resid:99 100 101 102 103 104 105 106 107 156 157 158 159 160 161 162 163 167 80…	N/A	foldxDdg:-2.42955;plddt:86.91	0.361	NC_000002.12:g.24918669A>G	2p23.3	ClinGen-CA1554540|UniProt-VAR_048248|1000Genomes-rs11676272;MAF:0.4331|ESP-rs11676272|ExAC-rs11676272|TOPMed-rs11676272|dbSNP-rs11676272|gnomAD-rs11676272	N/A	N/A	N/A
rs11887534	G	C	0.1104(BENIGN)	-4.888	N/A	ABCG8	Gau/Cau	+	23.4	[ENSP00000272286.2(ENST00000272286.4)]	N/A	Q9H221	Q9H221-1;19;Asp/His;missense;[ENSP00000272286.2(ENST00000272286.4)]	ATP-binding cassette sub-family G member 8	19	Asp/His	missense	N/A	CHAIN-ATP-binding cassette sub-family G member 8;Range:1-673|TOPO_DOM-Cytoplasmic;Range:1-416(PubMed:[27144356])|REGION-Disordered;Range:1-25(SAM:[MobiDB-lite])	Evidence at protein level	673	2024-03-27	2001-03-01	RHEA:39051(UniProtKB:[Q9DBM0])|RHEA:39103(UniProtKB:[Q9DBM0])	Heterodimer with ABCG8	Cell membrane;Apical cell membrane(Multi-pass membrane protein;Multi-pass membrane protein)	Belongs to the ABC transporter superfamily	Q9H222(ABCG5);Q14696(MESD);Q9H222-1(ABCG5)	N/A	N/A	N/A	0.479	NC_000002.12:g.43839108G>C	2p21	ClinGen-CA117156|ClinVar-RCV000005263;Pathogenic|ClinVar-RCV000266053;Pathogenic|ClinVar-RCV000269126;Pathogenic|ClinVar-RCV001094725;Pathogenic|ClinVar-RCV001705581;Pathogenic|ClinVar-RCV002345232;Pathogenic|ClinVar-RCV002490320;Pathogenic|UniProt-VAR_012250|1000Genomes-rs11887534;MAF:0.0605|ESP-rs11887534|ExAC-rs11887534|TOPMed-rs11887534|dbSNP-rs11887534|gnomAD-rs11887534	Gallbladder disease 4 (GBD4)-(ClinVar:[RCV000005263])|Sitosterolemia (STSL)-(pubmed:[23556150]ClinVar:[RCV000269126])|Sitosterolemia 1-(pubmed:[23556150]ClinVar:[RCV001094725])|Sitosterolemia 2-(ClinVar:[RCV002490320])	[Asp>Asn;NC_000002.12:g.43839108G>A;2p21;ClinGen-CA346662599|1000Genomes-rs11887534;MAF:0.0605|ESP-rs11887534|ExAC-rs11887534|TOPMed-rs11887534|gnomAD-rs11887534]	N/A
rs12582	G	A	0.1136(BENIGN)	-5.112	N/A	HJURP	uCc/uUc	-	1.86	[ENSP00000414109.1(ENST00000411486.7)]	N/A	Q8NCD3	Q8NCD3-3;606;Ser/Phe;missense;[ENSP00000401944.1(ENST00000441687.5)]|Q8NCD3-2;637;Ser/Phe;missense;[ENSP00000407208.1(ENST00000432087.5)]|Q8NCD3-1;691;Ser/Phe;missense;[ENSP00000414109.1(ENST00000411486.7)]|H7C0I6;11;Ser/Phe;missense;[ENSP00000395207.1(ENST00000433484.2)]	Holliday junction recognition protein	691	Ser/Phe	missense	N/A	CHAIN-Holliday junction recognition protein;Range:1-748|REGION-Disordered;Range:670-748(SAM:[MobiDB-lite])|COMPBIAS-Polar residues;Range:689-725(SAM:[MobiDB-lite])	Evidence at protein level	748	2024-03-27	2009-06-16	N/A	Interacts with CENPA (via CATD domain); the interaction is direct and specific for CENPA since it does not interact with H3	Nucleus, nucleolus;Chromosome, centromere	N/A	P49450(CENPA);P49450-1(CENPA);Q8NCD3(HJURP);P49450(CENPA)	N/A	N/A	N/A	0.617	NC_000002.12:g.233840708G>A	2q37.1	ClinGen-CA2180963|UniProt-VAR_056916|1000Genomes-rs12582;MAF:0.1583|ESP-rs12582|ExAC-rs12582|TOPMed-rs12582|dbSNP-rs12582|gnomAD-rs12582	N/A	N/A	N/A
rs12691202	C	T	N/A	N/A	N/A	APOB	Guc/Auc	-	15.81	[ENSP00000382200.4(ENST00000399256.4)]	N/A	A8MUN2	A8MUN2;730;Val/Ile;missense;[ENSP00000382200.4(ENST00000399256.4)]	Apolipoprotein B	730	Val/Ile	missense	N/A	N/A	N/A	N/A	N/A	N/A	N/A	N/A	N/A	N/A	N/A	N/A	N/A	N/A	N/A	N/A	N/A	N/A	N/A	N/A	N/A
rs17400325	T	C	0.9853(PATHOGENIC)	-15.173	N/A	PDE11A	uAu/uGu	-	29.9	[ENSP00000286063.5(ENST00000286063.11)]	N/A	Q9HCR9	Q9HCR9-4;283;Tyr/Cys;missense;[ENSP00000374333.3(ENST00000389683.7)]|Q9HCR9-3;369;Tyr/Cys;missense;[ENSP00000386539.1(ENST00000409504.5)]|Q9HCR9-2;477;Tyr/Cys;missense;[ENSP00000351232.4(ENST00000358450.8)]|Q9HCR9-1;727;Tyr/Cys;missense;[ENSP00000286063.5(ENST00000286063.11)]|H7C4D0;335;Tyr/Cys;missense;[ENSP00000416884.1(ENST00000433879.1)]	Dual 3',5'-cyclic-AMP and -GMP phosphodiesterase 11A	727	Tyr/Cys	missense	N/A	CHAIN-Dual 3',5'-cyclic-AMP and -GMP phosphodiesterase 11A;Range:1-933|DOMAIN-PDEase;Range:588-912(PROSITE-ProRule:[PRU01192])	Evidence at protein level	933	2024-01-24	2010-05-18	RHEA:16957(PubMed:[10725373,10906126,11050148,16330539])|RHEA:25277(PubMed:[10725373,10906126,11050148,16330539])	N/A	Cytoplasm, cytosol	Belongs to the cyclic nucleotide phosphodiesterase family	N/A	pocket_id:17;rad_gyration:5.986202;energy_per_vol:0.332905;buriedness:0.74359;resid:132 133 134 578 723 726 727 736 738 739 740 742 743 746 761 762 765 766 769;mean_plddt:82.30368421052633;score:577.0314647805112|pocket_id:37;rad_gyration:3.860952;energy_per_vol:0.319735;buriedness:0.755556;resid:132 134 136 726 727 728 735 738 739 742 769;mean_plddt:74.64;score:194.00670105605695	N/A	foldxDdg:2.96268;plddt:86.44	0.971	NC_000002.12:g.177701185T>C	2q31.2	ClinGen-CA1981660|1000Genomes-rs17400325;MAF:0.02216|ESP-rs17400325|ExAC-rs17400325|TOPMed-rs17400325|gnomAD-rs17400325	N/A	[Tyr>Asp;NC_000002.12:g.177701186A>C;2q31.2;ClinGen-CA349384819|gnomAD-rs1276296588]	N/A
rs2302154	T	C	0.0745(BENIGN)	-2.805	N/A	HJURP	Acg/Gcg	-	0.01	[ENSP00000414109.1(ENST00000411486.7)]	N/A	Q8NCD3	Q8NCD3-3;4;Thr/Ala;missense;[ENSP00000401944.1(ENST00000441687.5)]|Q8NCD3-2;4;Thr/Ala;missense;[ENSP00000407208.1(ENST00000432087.5)]|F8WCV1;4;Thr/Ala;missense;[ENSP00000403668.1(ENST00000453122.1)]|Q8NCD3-1;4;Thr/Ala;missense;[ENSP00000414109.1(ENST00000411486.7)]|C9JWC4;4;Thr/Ala;missense;[ENSP00000393253.1(ENST00000414924.5)]	Holliday junction recognition protein	4	Thr/Ala	missense	N/A	CHAIN-Holliday junction recognition protein;Range:1-748	Evidence at protein level	748	2024-03-27	2009-06-16	N/A	Interacts with CENPA (via CATD domain); the interaction is direct and specific for CENPA since it does not interact with H3	Nucleus, nucleolus;Chromosome, centromere	N/A	P49450(CENPA);P49450-1(CENPA);Q8NCD3(HJURP);P49450(CENPA)	N/A	N/A	foldxDdg:-0.260179;plddt:54.11	0.478	NC_000002.12:g.233854491T>C	2q37.1	ClinGen-CA2181494|UniProt-VAR_056912|1000Genomes-rs2302154;MAF:0.04872|ESP-rs2302154|ExAC-rs2302154|TOPMed-rs2302154|dbSNP-rs2302154|gnomAD-rs2302154	N/A	[Thr>Met;NC_000002.12:g.233854490G>A;2q37.1;ClinGen-CA2181493|1000Genomes-rs374800251;MAF:2.0E-4|ExAC-rs374800251|TOPMed-rs374800251|gnomAD-rs374800251][Thr>Arg;NC_000002.12:g.233854490G>C;2q37.1;ClinGen-CA351108332|1000Genomes-rs374800251;MAF:2.0E-4|ExAC-rs374800251|TOPMed-rs374800251|gnomAD-rs374800251]	N/A
rs3755322	C	G	0.0732(BENIGN)	3.042	N/A	UGT1A5	gaC/gaG	+	0.46	[ENSP00000362513.3(ENST00000373414.4)]	N/A	P35504	Q5DSZ9;50;Asp/Glu;missense;[ENSP00000362513.3(ENST00000373414.4)]|P35504-1;50;Asp/Glu;missense;[ENSP00000362513.3(ENST00000373414.4)]	UDP-glucuronosyltransferase 1A5	50	Asp/Glu	missense	N/A	CHAIN-UDP-glucuronosyltransferase 1A5;Range:29-534	Evidence at protein level	534	2024-01-24	1994-06-01	RHEA:21032(PubMed:[18674515])|RHEA:63744(PubMed:[18674515])	Homodimer (By similarity)	Endoplasmic reticulum membrane(Single-pass membrane protein)	Belongs to the UDP-glycosyltransferase family	N/A	N/A	N/A	foldxDdg:-0.522696;plddt:94.93	0.619	NC_000002.12:g.233713141C>G	2q37.1	ClinGen-CA2178624|UniProt-VAR_059845|1000Genomes-rs3755322;MAF:0.145|ESP-rs3755322|ExAC-rs3755322|TOPMed-rs3755322|dbSNP-rs3755322|gnomAD-rs3755322	N/A	[Asp>Gly;NC_000002.12:g.233713140A>G;2q37.1;ClinGen-CA2178623|ExAC-rs759679762|gnomAD-rs759679762]	N/A
rs492594	G	C	0.0605(BENIGN)	-2.331	N/A	G6PC2	Guu/Cuu	+	10.3	[ENSP00000364512.3(ENST00000375363.8)]	N/A	Q9NQR9	Q9NQR9-1;219;Val/Leu;missense;[ENSP00000364512.3(ENST00000375363.8)]	Glucose-6-phosphatase 2	219	Val/Leu	missense	N/A	CHAIN-Glucose-6-phosphatase 2;Range:1-355|TRANSMEM-Helical;Range:212-232()	Evidence at protein level	355	2024-01-24	2000-10-01	RHEA:16689(PubMed:[14722102])	N/A	Endoplasmic reticulum membrane(Multi-pass membrane protein)	Belongs to the glucose-6-phosphatase family	N/A	pocket_id:3;rad_gyration:6.634469;energy_per_vol:0.368251;buriedness:0.770161;resid:207 208 209 211 212 215 219 222 226 233 256 259 260 263 264 267 317 318 319 321 322 325 326;mean_plddt:92.93608695652172;score:888.83682818417	N/A	foldxDdg:-0.754931;plddt:93.56	0.65	NC_000002.12:g.168907666G>C	2q31.1	ClinGen-CA1950776|UniProt-VAR_043374|1000Genomes-rs492594;MAF:0.4635|ESP-rs492594|ExAC-rs492594|TOPMed-rs492594|dbSNP-rs492594|gnomAD-rs492594	N/A	N/A	N/A
rs7607980	T	C	0.0782(BENIGN)	-3.155	N/A	COBLL1	Aau/Gau	-	6.48	[ENSP00000364607.2(ENST00000375458.6), ENSP00000498242.1(ENST00000652658.2)]	N/A	Q53SF7	A0A0X1KG75;947;Asn/Asp;missense;[ENSP00000387326.5(ENST00000409184.8)]|Q53SF7-3;939;Asn/Asp;missense;[ENSP00000341360.4(ENST00000342193.8)]|A0A0D9SG04;1006;Asn/Asp;missense;[ENSP00000487041.2(ENST00000629362.2)]|Q53SF7-4;901;Asn/Asp;missense;[ENSP00000364607.2(ENST00000375458.6), ENSP00000498242.1(ENST00000652658.2)]	Cordon-bleu protein-like 1	901	Asn/Asp	missense	N/A	CHAIN-Cordon-bleu protein-like 1;Range:1-1128|REGION-Disordered;Range:882-964(SAM:[MobiDB-lite])	Evidence at protein level	1128	2024-03-27	2019-09-18	N/A	N/A	N/A	N/A	N/A	N/A	N/A	N/A	0.392	NC_000002.12:g.164694691T>C	2q24.3	ClinGen-CA1937191|1000Genomes-rs7607980;MAF:0.1074|ESP-rs7607980|ExAC-rs7607980|TOPMed-rs7607980|gnomAD-rs7607980	N/A	[Asn>Lys;NC_000002.12:g.164694689A>T;2q24.3;ClinGen-CA349006267|cosmic curated-COSM3406978|gnomAD-rs1273131814][Asn>Ser;NC_000002.12:g.164694690T>C;2q24.3;ClinGen-CA349006269|TOPMed-rs1308677490|gnomAD-rs1308677490]	N/A
rs34006803	G	A	0.1265(BENIGN)	-2.75	N/A	PARP9	uCg/uUg	-	14.46	[ENSP00000353512.2(ENST00000360356.6)]	N/A	Q8IXQ6	Q8IXQ6-1;21;Ser/Leu;missense;[ENSP00000353512.2(ENST00000360356.6)]	Protein mono-ADP-ribosyltransferase PARP9	21	Ser/Leu	missense	N/A	CHAIN-Protein mono-ADP-ribosyltransferase PARP9;Range:1-854	Evidence at protein level	854	2024-03-27	2003-10-10	RHEA:58268(PubMed:[28525742])	Forms a stable complex with E3 ligase DTX3L; the interaction is required for PARP9 mediated ADP-ribosylation of ubiquitin (PubMed:12670957, PubMed:28525742)	Cytoplasm, cytosol;Nucleus	Belongs to the ARTD/PARP family	N/A	pocket_id:5;rad_gyration:8.217764;energy_per_vol:0.412879;buriedness:0.840197;resid:21 22 23 24 25 26 27 28 30 31 32 33 34 35 36 37 38 39 40 42 43 551 552 553 554 555 556 557 558 559 560 562 563 575 606 607 608 610 611 614 615 618 721 723;mean_plddt:63.17181818181817;score:957.5487017598504	N/A	N/A	0.318	NC_000003.12:g.122558421G>A	3q21.1	ClinGen-CA2571654|UniProt-VAR_056654|1000Genomes-rs34006803;MAF:0.07588|ESP-rs34006803|ExAC-rs34006803|TOPMed-rs34006803|dbSNP-rs34006803|gnomAD-rs34006803	N/A	[Ser>Pro;NC_000003.12:g.122558422A>G;3q21.1;ClinGen-CA2571655|ExAC-rs766635126|gnomAD-rs766635126]	N/A
rs34345884	G	C	0.1204(BENIGN)	-1.556	N/A	GMPPB	Cac/Gac	-	22.6	[ENSP00000311130.6(ENST00000308388.7), ENSP00000418565.1(ENST00000480687.5)]	N/A	Q9Y5P6	A0A7I2V691;126;His/Asp;missense;[ENSP00000504692.1(ENST00000678853.1)]|A0A7I2V2Y5;126;His/Asp;missense;[ENSP00000503176.1(ENST00000678010.1)]|A0A7I2V4B5;126;His/Asp;missense;[ENSP00000503880.1(ENST00000677393.1)]|A0A7I2YQI5;126;His/Asp;missense;[ENSP00000503768.1(ENST00000495627.2)]|Q9Y5P6-2;126;His/Asp;missense;[ENSP00000309092.6(ENST00000308375.10)]|Q9Y5P6-1;126;His/Asp;missense;[ENSP0000031113…	Mannose-1-phosphate guanyltransferase beta	126	His/Asp	missense	N/A	CHAIN-Mannose-1-phosphate guanyltransferase beta;Range:1-360|HELIX;Range:117-127(PDB:[7D73])	Evidence at protein level	360	2024-01-24	2007-10-23	RHEA:15229(UniProtKB:[P0C5I2])	Associates with GMPPA	Cytoplasm	Belongs to the transferase hexapeptide repeat family	Q7L190(DPPA4);Q8IVS8(GLYCTK);Q96IJ6(GMPPA);O15160(POLR1C);Q86UY0(TXNDC5)	pocket_id:21;rad_gyration:3.700545;energy_per_vol:0.362992;buriedness:0.791925;resid:123 126 127 129 151 152 153 154 208 209;mean_plddt:95.357;score:365.9109309026891	N/A	foldxDdg:0.282383;plddt:97.61	0.447	NC_000003.12:g.49722998G>C	3p21.31	ClinGen-CA2405592|ClinVar-RCV000242290;MAF:0.00879;Benign|ClinVar-RCV000539042;MAF:0.00879;Benign|ClinVar-RCV001795457;MAF:0.00879;Benign|UniProt-VAR_035372|1000Genomes-rs34345884;MAF:0.008786|ESP-rs34345884|ExAC-rs34345884|TOPMed-rs34345884|dbSNP-rs34345884|gnomAD-rs34345884	Autosomal recessive limb-girdle muscular dystrophy type 2T-(ClinVar:[RCV000539042])|Muscular dystrophy-dystroglycanopathy (congenital with brain and eye anomalies), type A14-(ClinVar:[RCV000539042])|Muscular dystrophy-dystroglycanopathy (congenital with intellectual disability), type B14 (MDDGB14)-(ClinVar:[RCV000539042])	[His>Arg;NC_000003.12:g.49722997T>C;3p21.31;ClinGen-CA352829502|gnomAD-rs1383720066][His>Tyr;NC_000003.12:g.49722998G>A;3p21.31;ClinGen-CA352829505|1000Genomes-rs34345884;MAF:0.008786|ESP-rs34345884|ExAC-rs34345884|TOPMed-rs34345884|gnomAD-rs34345884]	7d74;K126,L126,J126,G126,H126,I126,F126,E126;3.1;Electron Microscopy|7d72;I126,H126,L126,J126,B126,A126,K126,G126;3.4;Electron Microscopy|7d73;C126,L126,F126,H126,I126,G126,K126,J126;3.0;Electron Microscopy
rs34801630	C	T	0.1375(BENIGN)	-6.9	N/A	FYCO1	Gag/Aag	-	26.5	[ENSP00000296137.2(ENST00000296137.7)]	N/A	Q9BQS8	Q9BQS8-1;994;Glu/Lys;missense;[ENSP00000296137.2(ENST00000296137.7)]	FYVE and coiled-coil domain-containing protein 1	994	Glu/Lys	missense	N/A	CHAIN-FYVE and coiled-coil domain-containing protein 1;Range:2-1478|COILED;Range:596-1151()	Evidence at protein level	1478	2024-01-24	2011-02-08	N/A	Can form homodimers	Cytoplasmic vesicle, autophagosome;Endosome;Lysosome	N/A	O95166(GABARAP);Q9H0R8(GABARAPL1);P60520(GABARAPL2);O60341(KDM1A);P33176(KIF5B);Q9H0B6(KLC2);Q9GZQ8(MAP1LC3B);Q9BXW4(MAP1LC3C);Q96LA8(PRMT6);P0DTD1(rep);O75190-2(DNAJB6);O14901(KLF11);Q9BVL2(NUP58)	N/A	N/A	N/A	0.836	NC_000003.12:g.45966354C>T	3p21.31	ClinGen-CA2352926|ClinVar-RCV000253867;Benign|ClinVar-RCV000528598;Benign|ClinVar-RCV001651251;Benign|UniProt-VAR_056883|1000Genomes-rs34801630;MAF:0.05471|ESP-rs34801630|ExAC-rs34801630|TOPMed-rs34801630|dbSNP-rs34801630|gnomAD-rs34801630	Cataract 18 (CATC2)-(ClinVar:[RCV000528598])	[Glu>Ala;NC_000003.12:g.45966353T>G;3p21.31;ClinGen-CA352454763|gnomAD-rs1452238371]	N/A
rs5400	G	A	0.0405(BENIGN)	-0.101	N/A	SLC2A2	aCu/aUu	-	17.97	[ENSP00000323568.3(ENST00000314251.8)]	N/A	P11168	A0A0C4DH64;110;Thr/Ile;missense;[ENSP00000418456.1(ENST00000497642.5)]|P11168-1;110;Thr/Ile;missense;[ENSP00000323568.3(ENST00000314251.8)]	Solute carrier family 2, facilitated glucose transporter member 2	110	Thr/Ile	missense	N/A	CHAIN-Solute carrier family 2, facilitated glucose transporter member 2;Range:1-524|TRANSMEM-Helical; Name=2;Range:99-119()	Evidence at protein level	524	2024-01-24	1989-07-01	RHEA:60376(PubMed:[23396969,28083649,29548810,8457197])|RHEA:60372(PubMed:[23396969,28083649,8457197])|RHEA:60380(PubMed:[23396969])|RHEA:34915(PubMed:[8457197])	N/A	Cell membrane(Multi-pass membrane protein)	Belongs to the major facilitator superfamily	N/A	pocket_id:17;rad_gyration:3.223609;energy_per_vol:0.344623;buriedness:0.788396;resid:110 111 114 117 118 122 130 134 163 167;mean_plddt:96.573;score:619.5175385925999	N/A	foldxDdg:-1.11034;plddt:96.27	0.651	NC_000003.12:g.171014511G>A	3q26.2	ClinGen-CA020012|ClinVar-RCV000118387;MAF:0.21526;Benign|ClinVar-RCV000370969;MAF:0.21526;Benign|ClinVar-RCV000675656;MAF:0.21526;Benign|UniProt-VAR_014719|1000Genomes-rs5400;MAF:0.2153|ESP-rs5400|ExAC-rs5400|TOPMed-rs5400|dbSNP-rs5400|gnomAD-rs5400	Fanconi-Bickel syndrome (FBS)-(ClinVar:[RCV000370969])	N/A	N/A
rs10016702	A	G	0.0516(BENIGN)	-4.383	N/A	ZNF518B	Ucc/Ccc	-	6.8	[ENSP00000317614.3(ENST00000326756.4)]	N/A	Q9C0D4	N/A	Zinc finger protein 518B	105	Ser/Pro	missense	N/A	CHAIN-Zinc finger protein 518B;Range:1-1074	Evidence at protein level	1074	2024-03-27	2008-02-05	N/A	N/A	Nucleus	Belongs to the krueppel C2H2-type zinc-finger protein family	N/A	N/A	N/A	N/A	0.429	NC_000004.12:g.10446016A>G	4p16.1	ClinGen-CA2858951|UniProt-VAR_038491|1000Genomes-rs10016702;MAF:0.2105|ESP-rs10016702|ExAC-rs10016702|TOPMed-rs10016702|dbSNP-rs10016702|gnomAD-rs10016702	N/A	[Ser>Thr;NC_000004.12:g.10446016A>T;4p16.1;ClinGen-CA2858952|1000Genomes-rs10016702;MAF:0.2105|ESP-rs10016702|ExAC-rs10016702|TOPMed-rs10016702|gnomAD-rs10016702]	N/A
rs114303452	A	G	0.1167(BENIGN)	-4.552	N/A	HGFAC	aAg/aGg	+	22.7	[ENSP00000372224.4(ENST00000382774.8)]	N/A	Q04756	D6RAR4;573;Lys/Arg;missense;[ENSP00000421801.1(ENST00000511533.1)]	Hepatocyte growth factor activator	566	Lys/Arg	missense	N/A	CHAIN-Hepatocyte growth factor activator long chain;Range:408-655|DOMAIN-Peptidase S1;Range:408-646(PROSITE-ProRule:[PRU00274])|DISULFID-;Range:535-604|HELIX;Range:564-567(PDB:[2R0L])	Evidence at protein level	655	2024-01-24	1994-06-01	N/A	Heterodimer of a short chain and a long chain linked by a disulfide bond	Secreted	Belongs to the peptidase S1 family	Q92624(APPBP2);Q8TD31-3(CCHCR1);Q8NBJ4(GOLM1);Q9BRI3(SLC30A2);Q86XK7(VSIG1)	pocket_id:20;rad_gyration:4.167814;energy_per_vol:0.329063;buriedness:0.749373;resid:531 532 534 560 561 562 563 565 566 585 586 587 588 590 626;mean_plddt:81.69333333333334;score:334.6243004069264	P78406-Q04756;A residues:62 64 82 83 84 85 86 87 90 105 106 107 108 109 111 113 117 118 119 120 121 122 124 125 126 127 128 129 131 140 141 142 143 149 150 151 152 154 155 156 157 159 160 161 162 163 164 165 166 167 168 172 174 189 199 200 201 202 214 236 336 337 338 339 340 341 342 343 344 345 347;B residues:104 105 106 107 134 135 136 138 139 140 141 142 143 144 145 146 207 209 211 214 215 216 …	foldxDdg:0.27508;plddt:89.93	0.526	NC_000004.12:g.3448188A>G	4p16.3	ClinGen-CA2828668|1000Genomes-rs114303452;MAF:0.009185|ESP-rs114303452|ExAC-rs114303452|TOPMed-rs114303452|gnomAD-rs114303452	N/A	N/A	3k2u;A159;2.35;X-ray diffraction|2r0k;A194;3.51;X-ray diffraction|2r0l;C159;2.2;X-ray diffraction|1ybw;B194,A194;2.7;X-ray diffraction|2wub;A159,C159;2.9;X-ray diffraction|2wuc;A159;2.7;X-ray diffraction|1yc0;A194;2.6;X-ray diffraction
rs17013285	G	A	0.0963(BENIGN)	-3.659	N/A	MEPE	Guu/Auu	+	6.76	[ENSP00000416984.3(ENST00000424957.8), ENSP00000354341.3(ENST00000361056.4)]	N/A	Q9NQ76	Q9NQ76-2;361;Val/Ile;missense;[ENSP00000378534.4(ENST00000395102.8)]|Q9NQ76-1;330;Val/Ile;missense;[ENSP00000416984.3(ENST00000424957.8), ENSP00000354341.3(ENST00000361056.4)]|D6RAC8;306;Val/Ile;missense;[ENSP00000422747.1(ENST00000497649.6)]	Matrix extracellular phosphoglycoprotein	330	Val/Ile	missense	N/A	CHAIN-Matrix extracellular phosphoglycoprotein;Range:18-525|REGION-Disordered;Range:237-525(SAM:[MobiDB-lite])	Evidence at protein level	525	2024-03-27	2000-10-01	N/A	Interacts (via the ASARM motif) with PHEX; the interaction is zinc-dependent	Secreted, extracellular space, extracellular matrix;Secreted	Belongs to the PF07175/osteoregulin family	P16333(NCK1);P78562(PHEX);Q2QGD7(ZXDC)	N/A	N/A	N/A	0.379	NC_000004.12:g.87845856G>A	4q22.1	ClinGen-CA3002770|ClinVar-RCV000734295;MAF:0.17232;Benign|UniProt-VAR_034094|1000Genomes-rs17013285;MAF:0.1723|ESP-rs17013285|ExAC-rs17013285|TOPMed-rs17013285|dbSNP-rs17013285|gnomAD-rs17013285	N/A	[Val>Leu;NC_000004.12:g.87845856G>C;4q22.1;ClinGen-CA357617690|1000Genomes-rs17013285;MAF:0.1723|ESP-rs17013285|ExAC-rs17013285|TOPMed-rs17013285|gnomAD-rs17013285]	N/A
rs1902023	A	C	0.0496(BENIGN)	-0.924	N/A	UGT2B15	Uau/Gau	-	0.15	[ENSP00000341045.5(ENST00000338206.6)]	N/A	P54855	N/A	UDP-glucuronosyltransferase 2B15	85	Tyr/Asp	missense	N/A	CHAIN-UDP-glucuronosyltransferase 2B15;Range:24-530	Evidence at protein level	530	2024-03-27	2011-05-03	RHEA:21032(PubMed:[16595710,18719240,23288867,7835232,9295060])|RHEA:52868(PubMed:[18719240,23288867])|RHEA:52924(PubMed:[23288867])|RHEA:53000(PubMed:[16595710])	N/A	Endoplasmic reticulum membrane(Single-pass membrane protein)	Belongs to the UDP-glycosyltransferase family	N/A	pocket_id:6;rad_gyration:4.150059;energy_per_vol:0.651937;buriedness:0.98063;resid:28 29 30 31 32 33 56 57 58 60 61 63 77 85 86 89 90 93 119 120 121 123 124 127 128 155;mean_plddt:91.72576923076925;score:963.1311914961725|pocket_id:30;rad_gyration:3.351692;energy_per_vol:0.343786;buriedness:0.79402;resid:80 81 85 119 121 122 123 125 126 129 232;mean_plddt:91.97454545454546;score:362.3842876917198	N/A	foldxDdg:1.65674;plddt:87.59	0.447	NC_000004.12:g.68670366A>C	4q13.2	ClinGen-CA2942748|UniProt-VAR_007713|1000Genomes-rs1902023;MAF:0.4535|ESP-rs1902023|ExAC-rs1902023|TOPMed-rs1902023|dbSNP-rs1902023|gnomAD-rs1902023	N/A	N/A	N/A
rs2231142	G	T	0.1201(BENIGN)	-5.37	N/A	ABCG2	Cag/Aag	-	19.66	[ENSP00000237612.3(ENST00000237612.8), ENSP00000498246.1(ENST00000650821.1)]	N/A	Q9UNQ0	Q9UNQ0-2;141;Gln/Lys;missense;[ENSP00000426917.1(ENST00000515655.5)]|Q9UNQ0-1;141;Gln/Lys;missense;[ENSP00000237612.3(ENST00000237612.8), ENSP00000498246.1(ENST00000650821.1)]	Broad substrate specificity ATP-binding cassette transporter ABCG2	141	Gln/Lys	missense	N/A	CHAIN-Broad substrate specificity ATP-binding cassette transporter ABCG2;Range:1-655|TOPO_DOM-Cytoplasmic;Range:1-395()|DOMAIN-ABC transporter;Range:37-286(PROSITE-ProRule:[PRU00434])|HELIX;Range:136-147(PDB:[8P7W])	Evidence at protein level	655	2024-03-27	2005-05-10	RHEA:16461(PubMed:[36749388,19506252,20368174,22132962,31003562])|RHEA:61332(UniProtKB:[Q7TMS5])|RHEA:38951(PubMed:[20110355])|RHEA:61348(PubMed:[12682043,28554189,30405239])|RHEA:61364(PubMed:[12682043])|RHEA:61368(PubMed:[12682043])|RHEA:61384(PubMed:[12682043])|RHEA:61372(PubMed:[12682043])|RHEA:61376(PubMed:[12682043])|RHEA:60128(PubMed:[12682043])|RHEA:61356(PubMed:[12682043])|RHEA:61352(Uni…	Homodimer; disulfide-linked (PubMed:15001581, PubMed:17686774, PubMed:18056989, PubMed:28554189)	Cell membrane;Apical cell membrane;Mitochondrion membrane(Multi-pass membrane protein;Multi-pass membrane protein;Multi-pass membrane protein)	Belongs to the ABC transporter superfamily	Q9UNQ0(ABCG2);P22413(ENPP1);P11309-2(PIM1);P0CG48(UBC);Q9UNQ0-1(ABCG2)	pocket_id:42;rad_gyration:3.039937;energy_per_vol:0.444095;buriedness:0.860902;resid:141 144 145 153 154 155 157 158 161 375 379 382;mean_plddt:95.73499999999996;score:612.0924049123628|pocket_id:51;rad_gyration:3.212465;energy_per_vol:0.537735;buriedness:0.90458;resid:134 137 138 139 141 142 158 379 382 383 386;mean_plddt:95.69545454545457;score:578.5324671575934	N/A	foldxDdg:-0.218271;plddt:97.07	0.374	NC_000004.12:g.88131171G>T	4q22.1	ClinGen-CA129179|ClinVar-RCV000023341;MAF:0.11941|ClinVar-RCV000023342;MAF:0.11941|ClinVar-RCV000211355;MAF:0.11941|ClinVar-RCV000419593;MAF:0.11941|ClinVar-RCV000851365;MAF:0.11941|ClinVar-RCV001787817;MAF:0.11941|UniProt-VAR_020780;Benign|1000Genomes-rs2231142;MAF:0.1194|ESP-rs2231142|ExAC-rs2231142|TOPMed-rs2231142|dbSNP-rs2231142|gnomAD-rs2231142	Neoplasm of ovary-(pubmed:[19042984,22964825,23188549,29450531,33410258]ClinVar:[RCV000419593])|Uric acid concentration, serum, quantitative trait locus 1 (UAQTL1)-(ClinVar:[RCV000023341])	[Gln>Glu;NC_000004.12:g.88131171G>C;4q22.1;ClinGen-CA357630433|1000Genomes-rs2231142;MAF:0.1194|ESP-rs2231142|ExAC-rs2231142|TOPMed-rs2231142|gnomAD-rs2231142][Gln>Pro;NC_000004.12:g.88131170T>G;4q22.1;ClinGen-CA3004922|ExAC-rs769050167|gnomAD-rs769050167]	6hco;F150,A150;3.58;Electron Microscopy|6feq;A141,B141;3.6;Electron Microscopy|6vxj;A141,B141;4.1;Electron Microscopy|6hij;A141,B141;3.56;Electron Microscopy|6vxh;B141,A141;4.0;Electron Microscopy|8bi0;B151,A151;3.2;Electron Microscopy|6vxi;B141,A141;3.7;Electron Microscopy|7ojh;B151,A151;3.1;Electron Microscopy|8bht;B151,A151;3.1;Electron Microscopy|7oji;A151,B151;3.4;Electron Microscopy|7nfd;F1…
rs3816873	T	C	0.1238(BENIGN)	-3.482	N/A	MTTP	aUc/aCc	+	17.1	[ENSP00000400821.1(ENST00000457717.6), ENSP00000265517.5(ENST00000265517.10)]	N/A	P55157	P55157-1;128;Ile/Thr;missense;[ENSP00000400821.1(ENST00000457717.6), ENSP00000265517.5(ENST00000265517.10)]|E9PBP6;45;Ile/Thr;missense;[ENSP00000427679.2(ENST00000511045.6)]|P55157-2;128;Ile/Thr;missense;[ENSP00000407350.2(ENST00000422897.6)]	Microsomal triglyceride transfer protein large subunit	128	Ile/Thr	missense	N/A	CHAIN-Microsomal triglyceride transfer protein large subunit;Range:19-894|DOMAIN-Vitellogenin;Range:28-659(PROSITE-ProRule:[PRU00557])	Evidence at protein level	894	2024-01-24	1996-10-01	RHEA:38571(PubMed:[16478722,8876250])|RHEA:38895(PubMed:[15897609,16478722])|RHEA:39007(PubMed:[15897609,16478722,8876250])|RHEA:39011(PubMed:[15897609,16478722,8876250])	Heterodimer; heterodimerizes with the protein disulfide isomerase (P4HB/PDI) (PubMed:23475612, PubMed:26224785, PubMed:25108285, PubMed:16478722)	Endoplasmic reticulum;Golgi apparatus	N/A	P04114(APOB);Q4VIT4(PDIA3)	pocket_id:43;rad_gyration:3.829996;energy_per_vol:0.346865;buriedness:0.805014;resid:69 71 73 75 77 126 128 133 134 136 271 272 273 274 277;mean_plddt:86.57400000000001;score:427.4290110887798	N/A	foldxDdg:1.22702;plddt:89.26	0.339	NC_000004.12:g.99583507T>C	4q23	ClinGen-CA123823|ClinVar-RCV000015310;Benign|ClinVar-RCV000117636;Benign|ClinVar-RCV000333725;Benign|ClinVar-RCV001522091;Benign|ClinVar-RCV002496371;Benign|UniProt-VAR_014017|1000Genomes-rs3816873;MAF:0.2498|ESP-rs3816873|ExAC-rs3816873|TOPMed-rs3816873|dbSNP-rs3816873|gnomAD-rs3816873	Abetalipoproteinaemia (ABL)-(pubmed:[20050888,30358967]ClinVar:[RCV000333725,RCV002496371])|Metabolic syndrome X (AOMS1)-(pubmed:[22962670]ClinVar:[RCV002496371])|RECLASSIFIED - MTTP POLYMORPHISM-(ClinVar:[RCV000015310])	N/A	8eoj;B128;3.07;Electron Microscopy|6i7s;C128,D128;2.5;X-ray diffraction
rs73225891	C	G	0.3818(AMBIGUOUS)	-8.811	N/A	SLC2A9	Gac/Cac	-	22.5	[ENSP00000264784.3(ENST00000264784.8)]	N/A	Q9NRM0	Q9NRM0-1;281;Asp/His;missense;[ENSP00000264784.3(ENST00000264784.8)]|Q9NRM0-2;252;Asp/His;missense;[ENSP00000422209.1(ENST00000506583.5), ENSP00000311383.3(ENST00000309065.7)]	Solute carrier family 2, facilitated glucose transporter member 9	281	Asp/His	missense	N/A	CHAIN-Solute carrier family 2, facilitated glucose transporter member 9;Range:1-540|TOPO_DOM-Cytoplasmic;Range:253-316()	Evidence at protein level	540	2024-03-27	2010-07-13	RHEA:60368(PubMed:[18701466,18842065,22647630,28083649,28117388,36749388])	N/A	Cell membrane;Basolateral cell membrane(Multi-pass membrane protein;Multi-pass membrane protein)|Cell membrane;Apical cell membrane;Basolateral cell membrane(Multi-pass membrane protein;Multi-pass membrane protein)	Belongs to the major facilitator superfamily	Q5J8M3(EMC4);Q9Y287(ITM2B);Q5J8M3(EMC4);Q9Y287(ITM2B)	N/A	N/A	foldxDdg:2.12276;plddt:90.03	0.789	NC_000004.12:g.9920546C>G	4p16.1	ClinGen-CA2857059|ClinVar-RCV000386577;MAF:0.00659;Benign|ClinVar-RCV001521714;MAF:0.00659;Benign|UniProt-VAR_045652;Benign|1000Genomes-rs73225891;MAF:0.006589|ESP-rs73225891|ExAC-rs73225891|TOPMed-rs73225891|dbSNP-rs73225891|gnomAD-rs73225891	Hypouricemia, renal, 2-(ClinVar:[RCV000386577])	N/A	N/A
rs75487798	T	C	0.077(BENIGN)	-2.575	N/A	ZNF518B	Auu/Guu	-	10.93	[ENSP00000317614.3(ENST00000326756.4)]	N/A	Q9C0D4	N/A	Zinc finger protein 518B	916	Ile/Val	missense	N/A	CHAIN-Zinc finger protein 518B;Range:1-1074	Evidence at protein level	1074	2024-03-27	2008-02-05	N/A	N/A	Nucleus	Belongs to the krueppel C2H2-type zinc-finger protein family	N/A	pocket_id:1;rad_gyration:12.993891;energy_per_vol:0.371671;buriedness:0.806663;resid:141 169 176 179 180 183 200 914 916 917 918 919 920 921 922 923 924 925 926 927 929 930 931 932 933 934 935 936 937 938 939 940 941 942 943 944 945 946 955 956 959 960 962 963 965 966 969 970 971 972 973 974 975 976 977 978 979 980 981 982 983 984 985 988 989 992 993 996;mean_plddt:46.52132352941176;score:948.965…	N/A	N/A	0.547	NC_000004.12:g.10443583T>C	4p16.1	ClinGen-CA2858427|1000Genomes-rs75487798;MAF:0.009585|ESP-rs75487798|ExAC-rs75487798|TOPMed-rs75487798|gnomAD-rs75487798	N/A	[Ile>Leu;NC_000004.12:g.10443583T>G;4p16.1;ClinGen-CA92282756|1000Genomes-rs75487798;MAF:0.009585|ESP-rs75487798|ExAC-rs75487798|TOPMed-rs75487798|gnomAD-rs75487798]	N/A
rs34225933	C	T	0.0639(BENIGN)	-5.877	N/A	SLC34A1	Cac/Uac	+	4.01	[ENSP00000321424.4(ENST00000324417.6)]	N/A	Q06495	Q06495-1;568;His/Tyr;missense;[ENSP00000321424.4(ENST00000324417.6)]	Sodium-dependent phosphate transport protein 2A	568	His/Tyr	missense	N/A	CHAIN-Sodium-dependent phosphate transport protein 2A;Range:1-639|TOPO_DOM-Cytoplasmic;Range:562-639(UniProtKB:[Q06496])	Evidence at protein level	639	2024-03-27	1995-02-01	RHEA:71255(PubMed:[12324554,20335586,26047794,8327470])	Interacts via its C-terminal region with NHERF4 (By similarity)	Apical cell membrane;Cell membrane(Multi-pass membrane protein;Multi-pass membrane protein)	Belongs to the SLC34A transporter family	N/A	N/A	N/A	foldxDdg:-0.20307;plddt:83.48	0.318	NC_000005.10:g.177398068C>T	5q35.3	ClinGen-CA3580866|ClinVar-RCV000292092;MAF:0.00879;Benign|ClinVar-RCV000340024;MAF:0.00879;Benign|ClinVar-RCV000392789;MAF:0.00879;Benign|ClinVar-RCV001152238;MAF:0.00879;Benign|ClinVar-RCV001512358;MAF:0.00879;Benign|ClinVar-RCV001702436;MAF:0.00879;Benign|1000Genomes-rs34225933;MAF:0.008786|ESP-rs34225933|ExAC-rs34225933|TOPMed-rs34225933|dbSNP-rs34225933|gnomAD-rs34225933	Factor XII deficiency disease-(ClinVar:[RCV000340024])|Hereditary angioneurotic edema (HAE)-(pubmed:[22197274]ClinVar:[RCV000292092])|Hypophosphatemic nephrolithiasis/osteoporosis 1-(ClinVar:[RCV001152238])|Nephrolithiasis/osteoporosis, hypophosphatemic-(ClinVar:[RCV000392789])	N/A	N/A
rs34592828	G	A	0.3054(BENIGN)	-4.03	N/A	IQGAP2	cGg/cAg	+	24.6	[ENSP00000274364.6(ENST00000274364.11)]	N/A	Q13576	Q13576-1;1459;Arg/Gln;missense;[ENSP00000274364.6(ENST00000274364.11)]|Q13576-2;955;Arg/Gln;missense;[ENSP00000379535.3(ENST00000396234.7)]|Q13576-3;955;Arg/Gln;missense;[ENSP00000426027.1(ENST00000502745.5)]|F5H7S7;1409;Arg/Gln;missense;[ENSP00000442313.2(ENST00000379730.7)]	Ras GTPase-activating-like protein IQGAP2	1459	Arg/Gln	missense	N/A	CHAIN-Ras GTPase-activating-like protein IQGAP2;Range:1-1575	Evidence at protein level	1575	2024-03-27	2010-03-23	N/A	N/A	N/A	N/A	N/A	pocket_id:21;rad_gyration:4.562009;energy_per_vol:0.436112;buriedness:0.869811;resid:835 838 839 840 842 843 846 1449 1452 1453 1454 1455 1456 1457 1459 1569 1572 1573 1574 1575;mean_plddt:51.222;score:213.44905551039164|pocket_id:68;rad_gyration:4.209051;energy_per_vol:0.345297;buriedness:0.792771;resid:1455 1456 1457 1458 1459 1460 1461 1573 1575;mean_plddt:40.035555555555554;score:55.605943902…	N/A	N/A	0.561	NC_000005.10:g.76701084G>A	5q13.3	ClinGen-CA3313057|1000Genomes-rs34592828;MAF:0.01398|ESP-rs34592828|ExAC-rs34592828|TOPMed-rs34592828|gnomAD-rs34592828	N/A	[Arg>Trp;NC_000005.10:g.76701083C>T;5q13.3;ClinGen-CA3313056|ExAC-rs773849577|TOPMed-rs773849577|gnomAD-rs773849577]	N/A
rs6180	A	C	0.0788(BENIGN)	-2.362	N/A	GHR	Auc/Cuc	+	23.6	[ENSP00000482373.1(ENST00000618088.4), ENSP00000478291.1(ENST00000615111.4), ENSP00000442206.2(ENST00000537449.5), ENSP00000478332.1(ENST00000612382.4), ENSP00000230882.4(ENST00000230882.9), ENSP00000479846.1(ENST00000612626.4)]	N/A	P10912	P10912-4;522;Ile/Leu;missense;[ENSP00000350335.3(ENST00000357703.6)]|A0A087X0H5;551;Ile/Leu;missense;[ENSP00000483403.1(ENST00000620156.4)]|P10912-1;544;Ile/Leu;missense;[ENSP00000482373.1(ENST00000618088.4), ENSP00000478291.1(ENST00000615111.4), ENSP00000442206.2(ENST00000537449.5), ENSP00000478332.1(ENST00000612382.4), ENSP00000230882.4(ENST00000230882.9), ENSP00000479846.1(ENST00000612626.4)]	Growth hormone receptor	544	Ile/Leu	missense	N/A	CHAIN-Growth hormone receptor;Range:19-638|TOPO_DOM-Cytoplasmic;Range:289-638()	Evidence at protein level	638	2024-01-24	1989-07-01	N/A	On growth hormone (GH) binding, forms homodimers and binds JAK2 via a box 1-containing domain	Cell membrane(Single-pass type I membrane protein)|Cell membrane(Single-pass type I membrane protein)|Secreted	Belongs to the type I cytokine receptor family	Q16829(DUSP7);P01241(GH1);P10912(GHR);P16333(NCK1);P18031(PTPN1);P17706(PTPN2);P26045(PTPN3);P43378(PTPN9);P23467(PTPRB);Q9HD43(PTPRH);Q12913(PTPRJ);Q9JLI4(Ncoa6)	N/A	N/A	N/A	0.599	NC_000005.10:g.42719137A>C	5p12	ClinGen-CA200655|ClinVar-RCV000009190;MAF:0.44449;Benign|ClinVar-RCV000173652;MAF:0.44449;Benign|ClinVar-RCV000392579;MAF:0.44449;Benign|ClinVar-RCV001701562;MAF:0.44449;Benign|ClinVar-RCV001719693;MAF:0.44449;Benign|UniProt-VAR_013941;Benign|1000Genomes-rs6180;MAF:0.4445|ESP-rs6180|ExAC-rs6180|TOPMed-rs6180|dbSNP-rs6180|gnomAD-rs6180	Hypercholesterolemia, familial, 1-(pubmed:[15177124,21600525,22364837,23725921,23788249,24404629,24418289,24636176,25053660,25356965,25404096,27854360,34012068,35802134]ClinVar:[RCV000009190])|Laron-type isolated somatotropin defect-(ClinVar:[RCV000392579])|Short stature due to partial GHR deficiency-(ClinVar:[RCV001701562])	[Ile>Thr;NC_000005.10:g.42719138T>C;5p12;ClinGen-CA359630659|gnomAD-rs1417298594][Ile>Val;NC_000005.10:g.42719137A>G;5p12;ClinGen-CA359630656|1000Genomes-rs6180;MAF:0.4445|ESP-rs6180|ExAC-rs6180|TOPMed-rs6180|gnomAD-rs6180]	N/A
rs1044498	A	C	0.0684(BENIGN)	-3.387	N/A	ENPP1	Aag/Cag	+	14.54	[ENSP00000498074.1(ENST00000647893.1)]	N/A	P22413	A0A3B3ISN7;66;Lys/Gln;missense;[ENSP00000497519.1(ENST00000650147.1)]|E9PE72;173;Lys/Gln;missense;[ENSP00000422424.1(ENST00000513998.5)]	Ectonucleotide pyrophosphatase/phosphodiesterase family member 1	173	Lys/Gln	missense	N/A	CHAIN-Ectonucleotide pyrophosphatase/phosphodiesterase family member 1;Range:1-925|CHAIN-Ectonucleotide pyrophosphatase/phosphodiesterase family member 1, secreted form;Range:103-925(UniProtKB:[P06802])|TOPO_DOM-Extracellular;Range:98-925()|DOMAIN-SMB 2;Range:145-189(PROSITE-ProRule:[PRU00350])|DISULFID-;Range:154-184(PROSITE-ProRule:[PRU00350])|DISULFID-;Range:164-177(PROSITE-ProRule:[PRU00350])…	Evidence at protein level	925	2024-01-24	2002-09-19	RHEA:23996(PubMed:[25344812,28011303])|RHEA:14245(PubMed:[25344812,28011303])|RHEA:29395(PubMed:[28011303])|RHEA:29391(UniProtKB:[P06802])|RHEA:27762(UniProtKB:[P06802])|RHEA:58808(PubMed:[25344812,28011303])|RHEA:32039(PubMed:[28011303])|RHEA:25277(PubMed:[28011303])	Homodimer (PubMed:28964717)|Monomeric (By similarity)	Cell membrane;Basolateral cell membrane(Single-pass type II membrane protein;Single-pass type II membrane protein)|Secreted	Belongs to the nucleotide pyrophosphatase/phosphodiesterase family	Q9UNQ0(ABCG2)	pocket_id:60;rad_gyration:3.182336;energy_per_vol:0.316737;buriedness:0.751825;resid:155 156 157 158 167 168 169 173;mean_plddt:94.87125;score:327.1493425468746	N/A	foldxDdg:0.11164;plddt:92.7	0.486	NC_000006.12:g.131851228A>C	6q23.2	ClinGen-CA123287|ClinVar-RCV000014558;MAF:0.34225;Likely pathogenic|ClinVar-RCV000033192;MAF:0.34225;Likely pathogenic|ClinVar-RCV000178259;MAF:0.34225;Likely pathogenic|ClinVar-RCV000265863;MAF:0.34225;Likely pathogenic|ClinVar-RCV000355961;MAF:0.34225;Likely pathogenic|ClinVar-RCV001255136;MAF:0.34225;Likely pathogenic|ClinVar-RCV001515718;MAF:0.34225;Likely pathogenic|ClinVar-RCV001659696;MAF:…	Arterial calcification, generalized, of infancy, 1 (GACI1)-(pubmed:[25392903]ClinVar:[RCV000355961])|Diabetes mellitus type 2, susceptibility to-(ClinVar:[RCV001255136])|Hypophosphatemic rickets-(ClinVar:[RCV001843453])|Hypophosphatemic rickets, autosomal recessive, 2 (ARHR2)-(ClinVar:[RCV000265863])|Hypopigmentation-punctate palmoplantar keratoderma syndrome-(ClinVar:[RCV001659696])|Insulin resi…	[Lys>Glu;NC_000006.12:g.131851228A>G;6q23.2;ClinGen-CA365661974|1000Genomes-rs1044498;MAF:0.3423|ESP-rs1044498|ExAC-rs1044498|TOPMed-rs1044498|gnomAD-rs1044498][Lys>Arg;NC_000006.12:g.131851229A>G;6q23.2;ClinGen-CA365662013|gnomAD-rs1344875074]	6wev;B173,A173;2.9;X-ray diffraction|6wew;B173,A173;2.73;X-ray diffraction|6wet;A173,B173;2.6;X-ray diffraction|6weu;A173,B173;2.65;X-ray diffraction|2ys0;A34;0.0;Solution NMR|6wfj;B173,A173;2.5;X-ray diffraction
rs1334576	G	A	0.1815(BENIGN)	-5.049	N/A	RREB1	Ggg/Agg	+	21.7	[ENSP00000369265.3(ENST00000379933.7), ENSP00000305560.10(ENST00000349384.10)]	N/A	Q92766	Q92766-1;195;Gly/Arg;missense;[ENSP00000369265.3(ENST00000379933.7), ENSP00000305560.10(ENST00000349384.10)]|Q92766-3;195;Gly/Arg;missense;[ENSP00000335574.6(ENST00000334984.10)]|Q92766-2;195;Gly/Arg;missense;[ENSP00000369270.2(ENST00000379938.7)]|C9JU34;195;Gly/Arg;missense;[ENSP00000419511.1(ENST00000483150.1)]	Ras-responsive element-binding protein 1	195	Gly/Arg	missense	N/A	CHAIN-Ras-responsive element-binding protein 1;Range:1-1687|REGION-Disordered;Range:145-197(SAM:[MobiDB-lite])|COMPBIAS-Basic and acidic residues;Range:172-197(SAM:[MobiDB-lite])	Evidence at protein level	1687	2024-01-24	2007-07-10	N/A	Interacts with NEUROD1 (PubMed:12482979)	Nucleus speckle	Belongs to the krueppel C2H2-type zinc-finger protein family	N/A	N/A	N/A	N/A	0.421	NC_000006.12:g.7211585G>A	6p24.3	ClinGen-CA3625323|UniProt-VAR_033197|1000Genomes-rs1334576;MAF:0.4577|ESP-rs1334576|ExAC-rs1334576|TOPMed-rs1334576|dbSNP-rs1334576|gnomAD-rs1334576	N/A	[Gly>Trp;NC_000006.12:g.7211585G>T;6p24.3;ClinGen-CA362744887|1000Genomes-rs1334576;MAF:0.4577|ESP-rs1334576|ExAC-rs1334576|TOPMed-rs1334576|gnomAD-rs1334576]	N/A
rs2235501	G	C	0.0792(BENIGN)	-5.498	N/A	GPLD1	Cuc/Guc	-	1.83	[ENSP00000230036.1(ENST00000230036.2)]	N/A	P80108	P80108-1;17;Leu/Val;missense;[ENSP00000230036.1(ENST00000230036.2)]	Phosphatidylinositol-glycan-specific phospholipase D	17	Leu/Val	missense	N/A	SIGNAL-;Range:1-23	Evidence at protein level	840	2024-03-27	2007-02-20	RHEA:10832	Monomer	Secreted	Belongs to the GPLD1 family	N/A	pocket_id:13;rad_gyration:3.243566;energy_per_vol:0.571704;buriedness:0.963303;resid:13 14 15 16 17 18 19 20 21 22 23 72 73 74 217 308 309 310 312;mean_plddt:47.58368421052632;score:191.13595322853678	N/A	N/A	0.8	NC_000006.12:g.24489463G>C	6p22.3	ClinGen-CA3656505|UniProt-VAR_030743|1000Genomes-rs2235501;MAF:0.1526|ESP-rs2235501|ExAC-rs2235501|TOPMed-rs2235501|dbSNP-rs2235501|gnomAD-rs2235501	N/A	[Leu>Phe;NC_000006.12:g.24489463G>A;6p22.3;ClinGen-CA3656506|1000Genomes-rs2235501;MAF:0.1526|ESP-rs2235501|ExAC-rs2235501|TOPMed-rs2235501|gnomAD-rs2235501][Leu>Pro;NC_000006.12:g.24489462A>G;6p22.3;ClinGen-CA362967268|Ensembl-rs1581795046]	N/A
rs3756772	C	T	0.1187(BENIGN)	-1.846	N/A	FRK	Gga/Aga	-	19.32	[ENSP00000476145.1(ENST00000606080.2)]	N/A	P42685	P42685-1;122;Gly/Arg;missense;[ENSP00000476145.1(ENST00000606080.2)]	Tyrosine-protein kinase FRK	122	Gly/Arg	missense	N/A	CHAIN-Tyrosine-protein kinase FRK;Range:1-505|DOMAIN-SH2;Range:116-208(PROSITE-ProRule:[PRU00191])	Evidence at protein level	505	2024-03-27	1995-11-01	RHEA:10596(PROSITE-ProRule:[PRU10028])	Interacts (via the SH3-domain) with PTEN	Cytoplasm;Nucleus	Belongs to the protein kinase superfamily	Q12982(BNIP2);P60484(PTEN);P06400(RB1);Q15427(SF3B4)	pocket_id:2;rad_gyration:9.360989;energy_per_vol:0.408254;buriedness:0.827694;resid:26 27 28 29 30 47 50 51 52 53 54 55 56 80 102 103 104 105 106 107 110 111 112 113 114 117 118 119 120 121 122 125 128 129 144 209 210 211 212 213 214 215 216 217 218 219 255 256 257 258 259 284 285 286 287 288 289 290 291 293 306 307 308 309 310 337 340 362 363 364 365 366 367 369 373;mean_plddt:86.74399999999999;…	P12724-P42685;A residues:31 32 33 34 35 36 37 38 39 40 41 42 55 56 57 58 59 60 61 62 63 64 65 66 67 68 69 89 90 91 92 93 95 109 110 111 112 113 114 115 116 117 118 119 120 121 122 123 124 125 126 127 128 132 137 139 144 153 154 155 156 157 158 159;B residues:119 120 121 122 123 124 125 127 143 144 145 146 147 148 149 150 151 152 153 164 165 166 167 168 169 176 177 328 332 343 346 413 454 456 458 …	foldxDdg:-0.457119;plddt:87.71	0.61	NC_000006.12:g.116003979C>T	6q22.1	ClinGen-CA3967689|UniProt-VAR_006283|1000Genomes-rs3756772;MAF:0.4589|ESP-rs3756772|ExAC-rs3756772|TOPMed-rs3756772|dbSNP-rs3756772|gnomAD-rs3756772	N/A	[Gly>Glu;NC_000006.12:g.116003978C>T;6q22.1;ClinGen-CA146377193|Ensembl-rs772793869]	N/A
rs3798220	T	C	0.9818(PATHOGENIC)	-19.478	N/A	LPA	auA/auG	-	14.67	[ENSP00000321334.6(ENST00000316300.10)]	N/A	P08519	N/A	Apolipoprotein(a)	1891	Ile/Met	missense	N/A	CHAIN-Apolipoprotein(a);Range:20-2040()|DOMAIN-Peptidase S1;Range:1820-2038(PROSITE-ProRule:[PRU00274])	Evidence at protein level	2040	2024-01-24	2022-02-23	N/A	Disulfide-linked to apo-B100	N/A	Belongs to the peptidase S1 family	P02749(APOH);P02751(FN1)	N/A	N/A	foldxDdg:-0.463932;plddt:81.13|foldxDdg:-0.309018;plddt:81.73|foldxDdg:0.09437;plddt:78.72|foldxDdg:-0.412973;plddt:63.1|foldxDdg:-0.291956;plddt:80.04|foldxDdg:-0.447929;plddt:64.24|foldxDdg:-0.32962;plddt:78.32	0.0	NC_000006.12:g.160540105T>C	6q25.3	ClinGen-CA4085637|ClinVar-RCV001251437;Benign|UniProt-VAR_047301|1000Genomes-rs3798220;MAF:0.05132|ESP-rs3798220|ExAC-rs3798220|TOPMed-rs3798220|dbSNP-rs3798220|gnomAD-rs3798220	LIPOPROTEIN(a) POLYMORPHISM-(ClinVar:[RCV001251437])	[Ile>Thr;NC_000006.12:g.160540106A>G;6q25.3;ClinGen-CA366349492|gnomAD-rs1267729328]	N/A
rs9276436	T	C	0.1115(BENIGN)	-8.914	N/A	HLA-DQA2	gUg/gCg	+	11.79	[ENSP00000364076.3(ENST00000374940.4)]	N/A	P01906	Q76NI6;227;Val/Ala;missense;[ENSP00000364076.3(ENST00000374940.4)]	HLA class II histocompatibility antigen, DQ alpha 2 chain	227	Val/Ala	missense	N/A	CHAIN-HLA class II histocompatibility antigen, DQ alpha 2 chain;Range:24-255|TRANSMEM-Helical;Range:218-240()	Evidence at protein level	255	2024-03-27	1991-02-01	N/A	Heterodimer of an alpha and a beta subunit; also referred as MHC class II molecule	Cell membrane;Endoplasmic reticulum membrane;Golgi apparatus, trans-Golgi network membrane;Endosome membrane;Lysosome membrane(Single-pass type I membrane protein;Single-pass type I membrane protein;Single-pass type I membrane protein;Single-pass type I membrane protein;Single-pass type I membrane protein)	Belongs to the MHC class II family	Q8TAF8(LHFPL5)	N/A	N/A	foldxDdg:-0.298621;plddt:93.81	0.704	CHR_HSCHR6_MHC_APD_CTG1:g.32786852T>C	6p21.32	1000Genomes-rs9276436;MAF:0.1094|ESP-rs9276436|ExAC-rs9276436|TOPMed-rs9276436|gnomAD-rs9276436|ClinGen-CA3745101|UniProt-VAR_033431|dbSNP-rs9276436	N/A	[Val>Leu;NC_000006.12:g.32746305G>T;6p21.32;ClinGen-CA363572623|gnomAD-rs1414832703]	N/A
rs9362415	A	G	0.0542(BENIGN)	-2.711	N/A	ZNF292	Aua/Gua	+	4.62	[ENSP00000358590.3(ENST00000369577.8)]	N/A	O60281	A0A8V8TPI9;1740;Ile/Val;missense;[ENSP00000514683.1(ENST00000699914.1)]|O60281-1;1740;Ile/Val;missense;[ENSP00000358590.3(ENST00000369577.8)]|J3KNV1;1735;Ile/Val;missense;[ENSP00000342847.4(ENST00000339907.8)]	Zinc finger protein 292	1740	Ile/Val	missense	N/A	CHAIN-Zinc finger protein 292;Range:1-2723	Evidence at protein level	2723	2024-03-27	2010-03-23	N/A	N/A	Nucleus	Belongs to the krueppel C2H2-type zinc-finger protein family	N/A	N/A	N/A	N/A	0.62	NC_000006.12:g.87258847A>G	6q14.3	ClinGen-CA3914449|UniProt-VAR_062972|1000Genomes-rs9362415;MAF:0.4071|ESP-rs9362415|ExAC-rs9362415|TOPMed-rs9362415|dbSNP-rs9362415|gnomAD-rs9362415	N/A	[Ile>Leu;NC_000006.12:g.87258847A>T;6q14.3;ClinGen-CA364931640|1000Genomes-rs9362415;MAF:0.4071|ESP-rs9362415|ExAC-rs9362415|TOPMed-rs9362415|gnomAD-rs9362415]	N/A
rs9370867	A	G	0.0656(BENIGN)	-2.512	N/A	MYLIP	aAc/aGc	+	6.98	[ENSP00000349298.3(ENST00000356840.8)]	N/A	Q8WY64	Q5TIA5;161;Asn/Ser;missense;[ENSP00000008686.5(ENST00000349606.4)]|Q8WY64-1;342;Asn/Ser;missense;[ENSP00000349298.3(ENST00000356840.8)]	E3 ubiquitin-protein ligase MYLIP	342	Asn/Ser	missense	N/A	CHAIN-E3 ubiquitin-protein ligase MYLIP;Range:1-445	Evidence at protein level	445	2024-03-27	2005-12-20	N/A	Homodimer	Cytoplasm;Cell membrane(Peripheral membrane protein)	N/A	Q6UY14-3(ADAMTSL4);Q92870-2(APBB2);Q03989(ARID5A);P54252(ATXN3);Q9Y2B0(CNPY2);Q96D03(DDIT4L);G5E9A7(DMWD);Q5JST6(EFHC2);Q9NQT4(EXOSC5);Q9NTX9(FAM217B);Q96IK5(GMCL1);Q96ED9-2(HOOK2);O43464(HTRA2);Q9UMF0(ICAM5);Q9C086(INO80B);Q5T7N3(KANK4);O14901(KLF11);Q8N448(LNX2);Q8TD10(MIPOL1);P0CG21(NHLRC4);Q86UR1-2(NOXA1);Q6NSM0(NR1D2);P55771(PAX9);D3DTS7(PMP22);Q8WWW0(RASSF5);Q9BWG6(SCNM1);O00560(SDCBP);Q7Z6…	N/A	N/A	foldxDdg:0.903761;plddt:40.76	0.453	NC_000006.12:g.16145094A>G	6p22.3	ClinGen-CA3644627|UniProt-VAR_019805|1000Genomes-rs9370867;MAF:0.23|ESP-rs9370867|ExAC-rs9370867|TOPMed-rs9370867|dbSNP-rs9370867|gnomAD-rs9370867	N/A	[Asn>Ile;NC_000006.12:g.16145094A>T;6p22.3;ClinGen-CA362798454|1000Genomes-rs9370867;MAF:0.23|ESP-rs9370867|ExAC-rs9370867|TOPMed-rs9370867|gnomAD-rs9370867][Asn>Thr;NC_000006.12:g.16145094A>C;6p22.3;ClinGen-CA362798455|1000Genomes-rs9370867;MAF:0.23|ESP-rs9370867|ExAC-rs9370867|TOPMed-rs9370867|gnomAD-rs9370867]	N/A
rs145188037	G	A	0.1354(BENIGN)	-5.143	N/A	IGFBP3	aCc/aUc	-	20.8	[ENSP00000477772.2(ENST00000613132.5)]	N/A	P17936	H0Y5K2;139;Thr/Ile;missense;[ENSP00000399116.1(ENST00000417621.5)]|B3KWK7;180;Thr/Ile;missense;[ENSP00000370476.4(ENST00000381086.9)]|H0Y485;129;Thr/Ile;missense;[ENSP00000390298.1(ENST00000428530.5)]|P17936-2;283;Thr/Ile;missense;[ENSP00000370473.4(ENST00000381083.9)]|P17936-1;277;Thr/Ile;missense;[ENSP00000477772.2(ENST00000613132.5)]	Insulin-like growth factor-binding protein 3	277	Thr/Ile	missense	N/A	CHAIN-Insulin-like growth factor-binding protein 3;Range:28-291|DOMAIN-Thyroglobulin type-1;Range:210-285(PROSITE-ProRule:[PRU00500])|DISULFID-;Range:264-285(PROSITE-ProRule:[PRU00500])	Evidence at protein level	291	2024-01-24	2007-03-06	N/A	Interacts with XLKD1 (By similarity)	Secreted	N/A	P00533(EGFR);Q92993(KAT5);Q8TAP4-4(LMO3);Q8IVG9(MT-RNR2);P17252(PRKCA);Q15047-2(SETDB1);Q86XT9(TMEM219);P61981(YWHAG)	pocket_id:7;rad_gyration:5.885341;energy_per_vol:0.371358;buriedness:0.786311;resid:216 236 238 239 246 250 252 261 262 263 264 265 268 269 270 271 275 276 277 278 279;mean_plddt:81.01523809523812;score:568.4151567029379|pocket_id:15;rad_gyration:3.862671;energy_per_vol:0.457008;buriedness:0.852368;resid:261 262 263 264 274 275 276 277 278 279 280 283;mean_plddt:67.33749999999999;score:198.340519…	N/A	foldxDdg:-0.149272;plddt:52.75	0.383	NC_000007.14:g.45914866G>A	7p12.3	ClinGen-CA4249769|1000Genomes-rs145188037;MAF:0.003594|ESP-rs145188037|ExAC-rs145188037|TOPMed-rs145188037|gnomAD-rs145188037	N/A	N/A	7wrq;B250;3.6;Electron Microscopy
rs2854746	G	C	0.0734(BENIGN)	-3.133	N/A	IGFBP3	gCg/gGg	-	11.67	[ENSP00000477772.2(ENST00000613132.5)]	N/A	P17936	P17936-2;32;Ala/Gly;missense;[ENSP00000370473.4(ENST00000381083.9)]|P17936-1;32;Ala/Gly;missense;[ENSP00000477772.2(ENST00000613132.5)]	Insulin-like growth factor-binding protein 3	32	Ala/Gly	missense	N/A	CHAIN-Insulin-like growth factor-binding protein 3;Range:28-291|REGION-IGF-binding;Range:28-134()	Evidence at protein level	291	2024-01-24	2007-03-06	N/A	Interacts with XLKD1 (By similarity)	Secreted	N/A	P00533(EGFR);Q92993(KAT5);Q8TAP4-4(LMO3);Q8IVG9(MT-RNR2);P17252(PRKCA);Q15047-2(SETDB1);Q86XT9(TMEM219);P61981(YWHAG)	N/A	N/A	foldxDdg:-0.0840133;plddt:52.91	0.32	NC_000007.14:g.45921046G>C	7p12.3	ClinGen-CA4249910|UniProt-VAR_025262|1000Genomes-rs2854746;MAF:0.4251|ExAC-rs2854746|TOPMed-rs2854746|dbSNP-rs2854746|gnomAD-rs2854746	N/A	[Ala>Glu;NC_000007.14:g.45921046G>T;7p12.3;ClinGen-CA158028561|1000Genomes-rs2854746;MAF:0.4251|ExAC-rs2854746|TOPMed-rs2854746|gnomAD-rs2854746][Ala>Pro;NC_000007.14:g.45921047C>G;7p12.3;ClinGen-CA367451757|TOPMed-rs983555155|gnomAD-rs983555155][Ala>Ser;NC_000007.14:g.45921047C>A;7p12.3;ClinGen-CA158028563|TOPMed-rs983555155|gnomAD-rs983555155][Ala>Thr;NC_000007.14:g.45921047C>T;7p12.3;ClinGen-C…	N/A
rs62621812	G	A	0.1043(BENIGN)	-2.785	N/A	ZNF800	Ccu/Ucu	-	19.24	[ENSP00000376988.1(ENST00000393312.5), ENSP00000265827.3(ENST00000265827.8), ENSP00000376989.1(ENST00000393313.5)]	N/A	Q2TB10	C9K0M9;103;Pro/Ser;missense;[ENSP00000401109.1(ENST00000436992.5)]|C9JHX9;103;Pro/Ser;missense;[ENSP00000403945.1(ENST00000434602.5)]	Zinc finger protein 800	103	Pro/Ser	missense	N/A	CHAIN-Zinc finger protein 800;Range:1-664	Evidence at protein level	664	2024-03-27	2006-01-24	N/A	N/A	Nucleus	Belongs to the krueppel C2H2-type zinc-finger protein family	N/A	pocket_id:10;rad_gyration:4.577372;energy_per_vol:0.324472;buriedness:0.727455;resid:98 99 100 101 102 103 104 105 106 107 110;mean_plddt:44.42454545454546;score:78.24599043164771	N/A	foldxDdg:0.320225;plddt:36.88	0.586	NC_000007.14:g.127375029G>A	7q31.33	ClinGen-CA4466589|1000Genomes-rs62621812;MAF:0.004992|ESP-rs62621812|ExAC-rs62621812|TOPMed-rs62621812|gnomAD-rs62621812	N/A	N/A	N/A
rs13266634	C	T	0.0747(BENIGN)	-6.451	N/A	SLC30A8	Cgg/Ugg	+	14.04	[ENSP00000415011.2(ENST00000456015.7)]	N/A	Q8IWU4	Q8IWU4-2;276;Arg/Trp;missense;[ENSP00000431069.1(ENST00000519688.5), ENSP00000407505.2(ENST00000427715.2), ENSP00000428545.1(ENST00000521243.5)]|Q8IWU4-1;325;Arg/Trp;missense;[ENSP00000415011.2(ENST00000456015.7)]	Proton-coupled zinc antiporter SLC30A8	325	Arg/Trp	missense	N/A	CHAIN-Proton-coupled zinc antiporter SLC30A8;Range:1-369|TOPO_DOM-Cytoplasmic;Range:267-369(PubMed:[16984975])	Evidence at protein level	369	2024-01-24	2008-06-10	RHEA:72627(PubMed:[32723473])	Homodimer	Cytoplasmic vesicle, secretory vesicle membrane;Cell membrane(Multi-pass membrane protein;Multi-pass membrane protein)	Belongs to the cation diffusion facilitator (CDF) transporter (TC 2	P16157-17(ANK1);Q13520(AQP6);Q9NVJ2(ARL8B);Q9HD20-3(ATP13A1);Q9BXK5(BCL2L13);Q13323(BIK);Q8WZ55(BSND);P13236(CCL4);Q8TCZ2(CD99L2);Q99675(CGRRF1);P56747(CLDN6);Q96FZ5(CMTM7);Q7Z7G2(CPLX4);Q96BA8(CREB3L1);Q9BUN8(DERL1);Q15125(EBP);Q9GZR5(ELOVL4);Q9Y282(ERGIC3);P60508(ERVFRD-1);Q5JX71(FAM209A);Q96KR6(FAM210B);Q96IV6(FAXDC2);Q8TBE3(FNDC9);O60883(GPR37L1);O15529(GPR42);Q14416(GRM2);Q9NP66(HMG20A);P305…	pocket_id:15;rad_gyration:3.383325;energy_per_vol:0.337916;buriedness:0.768977;resid:321 322 323 324 325 326 327 328 351 352 353 354 356;mean_plddt:89.02461538461537;score:352.19676095069775	Q8IWU4-Q99726;A residues:119 120 123 124 125 126 127 128 129 130 131 132 133 134 135 136 137 138 139 140 141 142 143 144 145 146 147 148 149 150 151 152 153 154 155 156 157 160 161 164 260 267 268 269 270 271 272 273 274 275 276 277 278 279 280 281 282 283 284 285 286 287 288 289 301 302 303 304 305 306 307 308 309 311 312 313 314 315 316 317 318 319 320 321 322 323 324 325 326 327 328 329 330 33…	foldxDdg:-0.184471;plddt:88.23	0.397	NC_000008.11:g.117172544C>T	8q24.11	ClinGen-CA114706|ClinVar-RCV000001055;MAF:0.25519|UniProt-VAR_031259;Benign|1000Genomes-rs13266634;MAF:0.2552|ESP-rs13266634|ExAC-rs13266634|TOPMed-rs13266634|dbSNP-rs13266634|gnomAD-rs13266634	Diabetes mellitus type 2, susceptibility to-(ClinVar:[RCV000001055])	[Arg>Leu;NC_000008.11:g.117172545G>T;8q24.11;ClinGen-CA371913045|1000Genomes-rs16889462;MAF:0.04892|ESP-rs16889462|ExAC-rs16889462|TOPMed-rs16889462|gnomAD-rs16889462][Arg>Pro;NC_000008.11:g.117172545G>C;8q24.11;ClinGen-CA4853726|1000Genomes-rs16889462;MAF:0.04892|ESP-rs16889462|ExAC-rs16889462|TOPMed-rs16889462|gnomAD-rs16889462][Arg>Gln;NC_000008.11:g.117172545G>A;8q24.11;ClinGen-CA4853725|UniP…	6xpf;A276,B276;5.9;Electron Microscopy|6xpd;B276,A276;3.8;Electron Microscopy|6xpe;A276,B276;4.1;Electron Microscopy
rs2073618	G	C	0.0529(BENIGN)	-2.53	N/A	TNFRSF11B	aaC/aaG	-	14.83	[ENSP00000297350.4(ENST00000297350.9)]	N/A	O00300	E5RFV7;3;Asn/Lys;missense;[ENSP00000427924.1(ENST00000517352.1)]	Tumor necrosis factor receptor superfamily member 11B	3	Asn/Lys	missense	N/A	SIGNAL-;Range:1-21(PubMed:[15340161,9571159])	Evidence at protein level	401	2024-01-24	2011-02-08	N/A	Homodimer	Secreted	N/A	P42858(HTT);P49768-2(PSEN1);O14788(TNFSF11)	N/A	N/A	foldxDdg:0.0834887;plddt:51.11	0.581	NC_000008.11:g.118951813G>C	8q24.12	ClinGen-CA4855017|ClinVar-RCV000250490;MAF:0.33327;Benign|ClinVar-RCV000291754;MAF:0.33327;Benign|ClinVar-RCV001651170;MAF:0.33327;Benign|UniProt-VAR_013439|1000Genomes-rs2073618;MAF:0.3333|ESP-rs2073618|ExAC-rs2073618|TOPMed-rs2073618|dbSNP-rs2073618|gnomAD-rs2073618	Hyperphosphatasemia with bone disease (PDB5)-(ClinVar:[RCV000291754])	[Asn>His;NC_000008.11:g.118951815T>G;8q24.12;ClinGen-CA184866085|TOPMed-rs961082553|gnomAD-rs961082553]	N/A
rs268	A	G	0.0659(BENIGN)	-4.127	N/A	LPL	aAu/aGu	+	21.3	[ENSP00000497642.1(ENST00000650287.1)]	N/A	P06858	A0A3B3IT60;5;Asn/Ser;missense;[ENSP00000497560.1(ENST00000650478.1)]|A0A1B1RVA9;318;Asn/Ser;missense;[ENSP00000497642.1(ENST00000650287.1)]	Lipoprotein lipase	318	Asn/Ser	missense	N/A	CHAIN-Lipoprotein lipase;Range:28-475	Evidence at protein level	475	2024-01-24	1988-01-01	RHEA:12044(PubMed:[11342582,11893776,12032167,1371284,16179346,2340307,26725083,27578112,29899144,30559189,7592706])|RHEA:18689(PubMed:[12032167,7592706])|RHEA:38575(PubMed:[12032167])|RHEA:38699(PubMed:[7592706])|RHEA:40475(PubMed:[7592706])|RHEA:41384(PubMed:[12032167])	Homodimer (PubMed:16179346, PubMed:26725083, PubMed:11893776) (Probable)	Cell membrane;Secreted;Secreted, extracellular space, extracellular matrix(Peripheral membrane protein)	Belongs to the AB hydrolase superfamily	A0A024R9H7(CCDC26);Q9UI10(EIF2B4);Q8IV16(GPIHBP1);O00746(NME4);C9J082(NPHP1);O14744(PRMT5);Q8TAS3(PRRG2);O00233(PSMD9);Q8IYM2(SLFN12);Q9UMY4(SNX12);O43493-5(TGOLN2);Q8NFB2(TMEM185A);Q8N0U8(VKORC1L1)	pocket_id:3;rad_gyration:4.890551;energy_per_vol:0.405852;buriedness:0.808772;resid:74 75 76 102 103 151 152 153 154 177 178 282 312 315 316 317 318 319;mean_plddt:98.25555555555556;score:944.3239314854483	N/A	foldxDdg:0.30237;plddt:97.63	0.509	NC_000008.11:g.19956018A>G	8p21.3	ClinGen-CA251887|ClinVar-RCV000001615;MAF:0.00519|ClinVar-RCV000781944;MAF:0.00519|ClinVar-RCV000988041;MAF:0.00519|ClinVar-RCV001356263;MAF:0.00519|ClinVar-RCV002222335;MAF:0.00519|ClinVar-RCV002371753;MAF:0.00519|ClinVar-RCV002467488;MAF:0.00519|UniProt-VAR_004239;Pathogenic|1000Genomes-rs268;MAF:0.005192|ESP-rs268|ExAC-rs268|TOPMed-rs268|dbSNP-rs268|gnomAD-rs268	Hyperlipidemia, familial combined, LPL related (FCHL3)-(pubmed:[22962670]ClinVar:[RCV000001615,RCV002467488])|Hyperlipidemia, familial combined, susceptibility to-(ClinVar:[RCV000781944])|Hyperlipoproteinemia 1 (HLPP1)-(pubmed:[10660334,10787434,11068186,11099402,11134145,11441134,11893776,12204001,12641539,1371284,1400331,1479292,14984478,15185149,1521525,15256764,15877202,1598907,1619366,163939…	[Asn>Asp;NC_000008.11:g.19956017A>G;8p21.3;ClinGen-CA370469318|TOPMed-rs1207662206]	6oau;B291,A291;2.48;X-ray diffraction|6oaz;D291,C291,B291,A291;3.04;X-ray diffraction|6e7k;B291,A291;2.8;X-ray diffraction|6ob0;C291,D291,B291,A291;2.81;X-ray diffraction
rs2066714	T	C	0.0632(BENIGN)	-3.944	N/A	ABCA1	auA/auG	-	1.02	[ENSP00000363868.3(ENST00000374736.8)]	N/A	O95477	A0A7I2V5U0;883;Ile/Met;missense;[ENSP00000504612.1(ENST00000678995.1)]	Phospholipid-transporting ATPase ABCA1	883	Ile/Met	missense	N/A	CHAIN-Phospholipid-transporting ATPase ABCA1;Range:1-2261	Evidence at protein level	2261	2024-01-24	2010-10-05	RHEA:38583(PubMed:[24097981,35974019])|RHEA:38567(PubMed:[24097981])|RHEA:38903(PubMed:[24097981])|RHEA:39051(PubMed:[35974019,10533863,14754908,24097981])	Interacts with MEGF10 (PubMed:17205124)	Cell membrane;Endosome(Multi-pass membrane protein)	Belongs to the ABC transporter superfamily	Q86UK0(ABCA12);P02647(APOA1);P27824(CANX);P60953(CDC42);Q13424(SNTA1);Q13884(SNTB1);Q86Y82(STX12)	pocket_id:4;rad_gyration:15.324244;energy_per_vol:0.382474;buriedness:0.798876;resid:2 6 668 669 671 672 673 674 675 676 677 678 679 680 682 683 686 727 731 732 734 735 832 833 835 836 837 839 840 843 844 845 846 847 851 852 853 854 855 857 858 861 863 864 865 866 867 868 869 870 871 872 873 874 875 876 877 878 879 880 883 886 888 889 891 896 897 898 899 900 901 902 903 919 920 921 922 948 955 95…	N/A	N/A	0.378	NC_000009.12:g.104824472T>C	9q31.1	ClinGen-CA5168681|ClinVar-RCV000310886;MAF:0.35683;Benign|ClinVar-RCV000398007;MAF:0.35683;Benign|ClinVar-RCV001509913;MAF:0.35683;Benign|ClinVar-RCV001700360;MAF:0.35683;Benign|ClinVar-RCV002450939;MAF:0.35683;Benign|UniProt-VAR_012625;Benign|1000Genomes-rs2066714;MAF:0.3568|ESP-rs2066714|ExAC-rs2066714|TOPMed-rs2066714|dbSNP-rs2066714|gnomAD-rs2066714	Hypoalphalipoproteinemia, primary, 1-(pubmed:[22962670]ClinVar:[RCV000398007])|Tangier disease (TGD)-(pubmed:[31751110]ClinVar:[RCV000310886])	[Ile>Val;NC_000009.12:g.104824474T>C;9q31.1;ClinGen-CA374320508|gnomAD-rs1394478178]	N/A
rs2274159	A	G	0.0539(BENIGN)	-2.434	N/A	WHRN	gUg/gCg	-	1.83	[ENSP00000354623.3(ENST00000362057.4)]	N/A	Q9P202	A0A669KBJ1;441;Val/Ala;missense;[ENSP00000501297.4(ENST00000674036.8)]|Q9P202-1;783;Val/Ala;missense;[ENSP00000354623.3(ENST00000362057.4)]|Q9P202-3;400;Val/Ala;missense;[ENSP00000265134.6(ENST00000265134.10)]|A0A8V8TNT0;231;Val/Ala;missense;[ENSP00000514396.1(ENST00000699485.1)]	Whirlin	783	Val/Ala	missense	N/A	CHAIN-Whirlin;Range:1-907|REGION-Disordered;Range:742-815(SAM:[MobiDB-lite])	Evidence at protein level	907	2024-03-27	2018-03-28	N/A	Forms homooligomers (By similarity)	Cytoplasm;Cell projection, stereocilium;Cell projection, growth cone;Photoreceptor inner segment;Synapse	N/A	Q8N7W2-2(BEND7);P35226(BMI1);Q9UMD9(COL17A1);Q96D03(DDIT4L);Q5JVL4(EFHC1);Q08379(GOLGA2);P81274(GPSM2);Q14145(KEAP1);P49023-2(PXN);Q8NBT2(SPC24);Q4KMQ1-2(TPRN)	N/A	N/A	N/A	0.397	NC_000009.12:g.114403966A>G	9q32	ClinGen-CA136912|cosmic curated-COSM4163262|ClinVar-RCV000038890;MAF:0.40635;Benign|ClinVar-RCV000278001;MAF:0.40635;Benign|ClinVar-RCV000370224;MAF:0.40635;Benign|ClinVar-RCV001517112;MAF:0.40635;Benign|UniProt-VAR_020594|1000Genomes-rs2274159;MAF:0.4063|ESP-rs2274159|ExAC-rs2274159|TOPMed-rs2274159|dbSNP-rs2274159|gnomAD-rs2274159	Autosomal recessive nonsyndromic hearing loss 31-(pubmed:[20301607]ClinVar:[RCV000370224])|Usher syndrome type 2D-(pubmed:[20301515,21697857]ClinVar:[RCV000278001])	[Val>Glu;NC_000009.12:g.114403966A>T;9q32;ClinVar-RCV001248312;MAF:0.40635;Variant of uncertain significance|dbSNP-rs2274159][Val>Met;NC_000009.12:g.114403967C>T;9q32;NCI-TCGA-TCGA novel]	N/A
rs34755188	C	T	0.2452(BENIGN)	-5.484	N/A	GRIN3A	cGc/cAc	-	23.8	[ENSP00000355155.3(ENST00000361820.6)]	N/A	Q8TCU5	N/A	Glutamate receptor ionotropic, NMDA 3A	480	Arg/His	missense	N/A	CHAIN-Glutamate receptor ionotropic, NMDA 3A;Range:24-1115|TOPO_DOM-Extracellular;Range:24-674()	Evidence at protein level	1115	2024-01-24	2008-11-04	N/A	Forms heteromeric channel of a zeta subunit (GRIN1), a epsilon subunit (GRIN2A, GRIN2B, GRIN2C or GRIN2D) and a third subunit (GRIN3A or GRIN3B)	Cell membrane;Postsynaptic cell membrane;Postsynaptic density(Multi-pass membrane protein)	Belongs to the glutamate-gated ion channel (TC 1	N/A	pocket_id:32;rad_gyration:3.418279;energy_per_vol:0.39289;buriedness:0.83237;resid:469 470 479 480 481 491 493 494 495 496 497 500 501 503 504;mean_plddt:60.51400000000002;score:165.94273447932247	N/A	foldxDdg:1.96837;plddt:85.63	0.515	NC_000009.12:g.101670973C>T	9q31.1	ClinGen-CA5163311|UniProt-VAR_047150|1000Genomes-rs34755188;MAF:0.008586|ESP-rs34755188|ExAC-rs34755188|TOPMed-rs34755188|dbSNP-rs34755188|gnomAD-rs34755188	N/A	[Arg>Cys;NC_000009.12:g.101670974G>A;9q31.1;ClinGen-CA5163313|1000Genomes-rs149729514;MAF:0.004393|ESP-rs149729514|ExAC-rs149729514|TOPMed-rs149729514|gnomAD-rs149729514][Arg>Gly;NC_000009.12:g.101670974G>C;9q31.1;ClinGen-CA5163312|1000Genomes-rs149729514;MAF:0.004393|ESP-rs149729514|ExAC-rs149729514|TOPMed-rs149729514|gnomAD-rs149729514]	N/A
rs34491125	G	C	0.124(BENIGN)	-3.827	N/A	JMJD1C	gaC/gaG	-	17.12	[ENSP00000382204.2(ENST00000399262.7)]	N/A	Q15652	Q15652-1;2400;Asp/Glu;missense;[ENSP00000382204.2(ENST00000399262.7)]|H7BXU7;947;Asp/Glu;missense;[ENSP00000335929.5(ENST00000327520.7)]|Q15652-3;2218;Asp/Glu;missense;[ENSP00000444682.1(ENST00000542921.5)]	Probable JmjC domain-containing histone demethylation protein 2C	2400	Asp/Glu	missense	N/A	CHAIN-Probable JmjC domain-containing histone demethylation protein 2C;Range:1-2540|DOMAIN-JmjC;Range:2274-2498(PROSITE-ProRule:[PRU00538])|HELIX;Range:2399-2412(PDB:[5FZO])	Evidence at protein level	2540	2024-01-24	2006-01-10	N/A	Interacts specifically with the ligand-binding domain of the thyroid receptor (TR)	Nucleus	Belongs to the JHDM2 histone demethylase family	P10275(AR)	pocket_id:19;rad_gyration:9.242583;energy_per_vol:0.380527;buriedness:0.817757;resid:2141 2143 2144 2147 2163 2164 2165 2166 2186 2187 2188 2189 2190 2191 2337 2393 2394 2395 2396 2397 2398 2399 2400 2403 2446 2448 2461 2462 2463 2464 2465 2485 2486 2488 2489 2492 2493 2496;mean_plddt:85.07736842105264;score:863.988487747619	N/A	foldxDdg:-0.618163;plddt:92.19	0.78	NC_000010.11:g.63177741G>C	10q21.3	ClinGen-CA5517703|ClinVar-RCV000533024;Benign|UniProt-VAR_049658|1000Genomes-rs34491125;MAF:0.02256|ESP-rs34491125|ExAC-rs34491125|TOPMed-rs34491125|dbSNP-rs34491125|gnomAD-rs34491125	Early myoclonic encephalopathy-(ClinVar:[RCV000533024])	N/A	2ypd;A245,B245;2.1;X-ray diffraction|5fzo;A245,B245;1.84;X-ray diffraction
rs11601507	C	A	0.2066(BENIGN)	-7.925	N/A	TRIM5	Guc/Uuc	-	1.2	[ENSP00000507420.1(ENST00000684655.1), ENSP00000369373.3(ENST00000380034.8)]	N/A	Q9C035	E7EQQ5;112;Val/Phe;missense;[ENSP00000388031.1(ENST00000412903.1)]|A0A804HHS7;112;Val/Phe;missense;[ENSP00000506742.1(ENST00000682968.1)]|Q9C035-1;112;Val/Phe;missense;[ENSP00000507420.1(ENST00000684655.1), ENSP00000369373.3(ENST00000380034.8)]|Q9C035-5;112;Val/Phe;missense;[ENSP00000393052.1(ENST00000433961.5)]|Q9C035-4;112;Val/Phe;missense;[ENSP00000369366.1(ENST00000380027.5)]|Q9C035-3;112;Val…	Tripartite motif-containing protein 5	112	Val/Phe	missense	N/A	CHAIN-Tripartite motif-containing protein 5;Range:2-493|ZN_FING-B box-type;Range:90-132(PROSITE-ProRule:[PRU00024])|STRAND;Range:111-113(PDB:[2YRG])	Evidence at protein level	493	2024-03-27	2001-06-01	N/A	Can form homodimers and homotrimers	Cytoplasm;Nucleus	Belongs to the TRIM/RBCC family	P13569(CFTR);O95863(SNAI1);Q13049(TRIM32);Q9C035(TRIM5);Q2Y080(null);Q08426(EHHADH);P13473-2(LAMP2);Q5T2T1(MPP7);Q8N3F0(MTURN);Q96HA8(NTAQ1);O43765(SGTA);Q9Y371(SH3GLB1);Q3SY00(TSGA10IP);P57075-2(UBASH3A);P61086(UBE2K);P07947(YES1)	pocket_id:14;rad_gyration:3.255464;energy_per_vol:0.340459;buriedness:0.790476;resid:94 95 96 97 102 111 112 113 114 117 120 122 123;mean_plddt:90.58461538461538;score:646.9891528801717|pocket_id:25;rad_gyration:3.168256;energy_per_vol:0.381513;buriedness:0.795848;resid:105 110 111 112 130 131 132 133 134 135 138 142;mean_plddt:91.23833333333332;score:499.40541184327276|pocket_id:11;rad_gyration:…	Q13049-Q9C035;A residues:94 95 96 97 98 99 100 101 102 106 107 108 109 110 111 112 113 114 115 116 117 118 119 120 136 137 138 139 140 141 142 143 144 145 146 147 148 149 150 151 152 153 154 155 156 157 158 159 160 161 162 163 164 165 166 167 168 169 170 171 172 173 174 175 176 177 178 179 180 181 182 184 185 186 187 188 189 191 192 193 194 195 196 198 199 200 201 202 203 205 206 207 208 209 210 …	foldxDdg:0.0870888;plddt:92.89	0.55	NC_000011.10:g.5679844C>A	11p15.4	ClinGen-CA5845612|UniProt-VAR_030154|1000Genomes-rs11601507;MAF:0.08626|ESP-rs11601507|ExAC-rs11601507|TOPMed-rs11601507|dbSNP-rs11601507|gnomAD-rs11601507	N/A	[Val>Ala;NC_000011.10:g.5679843A>G;11p15.4;ClinGen-CA379312665|Ensembl-rs1590275926][Val>Ile;NC_000011.10:g.5679844C>T;11p15.4;ClinGen-CA379312698|1000Genomes-rs11601507;MAF:0.08626|ESP-rs11601507|ExAC-rs11601507|TOPMed-rs11601507|gnomAD-rs11601507]	2yrg;A34;0.0;Solution NMR
rs11820589	G	A	0.0974(BENIGN)	-8.218	N/A	BUD13	cCg/cUg	-	22.5	[ENSP00000260210.3(ENST00000260210.5)]	N/A	Q9BRD0	Q9BRD0-2;148;Pro/Leu;missense;[ENSP00000364594.3(ENST00000375445.7)]|Q9BRD0-1;148;Pro/Leu;missense;[ENSP00000260210.3(ENST00000260210.5)]	BUD13 homolog	148	Pro/Leu	missense	N/A	CHAIN-BUD13 homolog;Range:1-619|REGION-Disordered;Range:106-429(SAM:[MobiDB-lite])|COMPBIAS-Basic and acidic residues;Range:111-202(SAM:[MobiDB-lite])	Evidence at protein level	619	2024-03-27	2001-06-01	N/A	Part of the activated spliceosome B/catalytic step 1 spliceosome, one of the forms of the spliceosome which has a well-formed active site but still cannot catalyze the branching reaction and is composed of at least 52 proteins, the U2, U5 and U6 snRNAs and the pre-mRNA	Nucleus	Belongs to the CWC26 family	Q92917(GPKOW);Q9Y388(RBMX2)	N/A	N/A	N/A	0.888	NC_000011.10:g.116763146G>A	11q23.3	ClinGen-CA6288271|UniProt-VAR_032344|1000Genomes-rs11820589;MAF:0.08886|ESP-rs11820589|ExAC-rs11820589|TOPMed-rs11820589|dbSNP-rs11820589|gnomAD-rs11820589	N/A	N/A	N/A
rs186808413	C	T	N/A	N/A	N/A	PAFAH1B2	uCg/uUg	+	10.51	[ENSP00000431365.1(ENST00000530272.1)]	N/A	P68402-4	P68402-4;161;Ser/Leu;missense;[ENSP00000431365.1(ENST00000530272.1)]	Isoform 4 of Platelet-activating factor acetylhydrolase IB subunit alpha2	161	Ser/Leu	missense	N/A	N/A	N/A	N/A	N/A	N/A	N/A	N/A	N/A	N/A	N/A	N/A	N/A	N/A	N/A	N/A	N/A	N/A	N/A	N/A	N/A
rs3816605	T	C	0.0537(BENIGN)	-4.335	N/A	NUP160	Acc/Gcc	-	11.32	[ENSP00000511549.1(ENST00000694866.1)]	N/A	Q12769	A0A8V8NBT1;317;Thr/Ala;missense;[ENSP00000367721.3(ENST00000378460.7)]|G3V198;316;Thr/Ala;missense;[ENSP00000433590.2(ENST00000530326.5)]|E9PR16;317;Thr/Ala;missense;[ENSP00000432367.3(ENST00000528071.5)]|Q12769-1;351;Thr/Ala;missense;[ENSP00000511549.1(ENST00000694866.1)]	Nuclear pore complex protein Nup160	351	Thr/Ala	missense	N/A	CHAIN-Nuclear pore complex protein Nup160;Range:1-1436	Evidence at protein level	1436	2024-03-27	2009-05-26	N/A	Part of the nuclear pore complex (NPC) (PubMed:11564755, PubMed:11684705)	Nucleus, nuclear pore complex	N/A	Q9NRI5(DISC1);P62508(ESRRG);Q9BW27(NUP85)	pocket_id:1;rad_gyration:15.415413;energy_per_vol:0.407271;buriedness:0.811142;resid:38 39 40 41 42 43 44 45 80 81 82 83 84 85 86 87 88 89 105 107 138 139 140 141 142 143 144 145 146 147 152 154 212 213 214 215 216 217 218 219 220 221 222 223 224 225 232 284 285 286 287 288 289 290 291 292 294 304 339 340 341 342 343 344 345 346 347 348 349 350 351 354 365 388 389 390 391 392 394 395 396 397 398 …	N/A	foldxDdg:0.0281921;plddt:81.51	0.495	NC_000011.10:g.47835701T>C	11p11.2	ClinGen-CA5981465|UniProt-VAR_055410|1000Genomes-rs3816605;MAF:0.3458|ESP-rs3816605|ExAC-rs3816605|TOPMed-rs3816605|dbSNP-rs3816605|gnomAD-rs3816605	N/A	[Thr>Pro;NC_000011.10:g.47835701T>G;11p11.2;ClinGen-CA5981466|1000Genomes-rs3816605;MAF:0.3458|ESP-rs3816605|ExAC-rs3816605|TOPMed-rs3816605|gnomAD-rs3816605][Thr>Ser;NC_000011.10:g.47835701T>A;11p11.2;ClinGen-CA380391891|1000Genomes-rs3816605;MAF:0.3458|ESP-rs3816605|ExAC-rs3816605|TOPMed-rs3816605|gnomAD-rs3816605]	7r5j;HC351,EC351,GC351,FC351;50.0;Electron Microscopy|7r5k;HC351,FC351,GC351,EC351;12.0;Electron Microscopy|5a9q;T351,KA351,CA351,B351;23.0;Electron Microscopy|7peq;Z351,Q351,H351,IA351;35.0;Electron Microscopy
rs17884869	G	A	0.5631(AMBIGUOUS)	-6.206	N/A	PITPNM2	cCu/cUu	-	25.2	[ENSP00000322218.4(ENST00000320201.10)]	N/A	Q9BZ72	Q9BZ72-2;9;Pro/Leu;missense;[ENSP00000280562.5(ENST00000280562.9)]|S4R414;9;Pro/Leu;missense;[ENSP00000474962.1(ENST00000546049.5)]|F5H664;9;Pro/Leu;missense;[ENSP00000437869.1(ENST00000542210.1)]|F5H361;9;Pro/Leu;missense;[ENSP00000445399.1(ENST00000541244.1)]|Q9BZ72-1;9;Pro/Leu;missense;[ENSP00000322218.4(ENST00000320201.10)]	Membrane-associated phosphatidylinositol transfer protein 2	9	Pro/Leu	missense	N/A	CHAIN-Membrane-associated phosphatidylinositol transfer protein 2;Range:1-1349	Evidence at protein level	1349	2024-01-24	2001-06-01	N/A	Interacts with PTK2B via its C-terminus (PubMed:10022914)	Endomembrane system(Peripheral membrane protein)	Belongs to the PtdIns transfer protein family	N/A	pocket_id:77;rad_gyration:3.772615;energy_per_vol:0.333731;buriedness:0.763804;resid:7 9 119 139 140 141 142 145 146 147 177 217;mean_plddt:94.9875;score:334.28712212780636	N/A	foldxDdg:4.04657;plddt:97.18	0.916	NC_000012.12:g.123034565G>A	12q24.31	ClinGen-CA6855606|UniProt-VAR_053584|1000Genomes-rs17884869;MAF:0.006989|ESP-rs17884869|ExAC-rs17884869|TOPMed-rs17884869|dbSNP-rs17884869|gnomAD-rs17884869	N/A	N/A	N/A
rs735295	T	C	0.0714(BENIGN)	-1.876	N/A	CCDC77	aUg/aCg	+	0	[ENSP00000239830.4(ENST00000239830.9)]	N/A	Q9BR77	Q9BR77-2;303;Met/Thr;missense;[ENSP00000412925.2(ENST00000412006.6), ENSP00000391870.1(ENST00000422000.5), ENSP00000440554.1(ENST00000540180.5)]|Q9BR77-1;335;Met/Thr;missense;[ENSP00000239830.4(ENST00000239830.9)]|F5H0W5;303;Met/Thr;missense;[ENSP00000445873.1(ENST00000543504.5)]	Coiled-coil domain-containing protein 77	335	Met/Thr	missense	N/A	CHAIN-Coiled-coil domain-containing protein 77;Range:1-488|COILED;Range:208-488()	Evidence at protein level	488	2024-03-27	2001-06-01	N/A	N/A	N/A	N/A	N/A	N/A	Q5BJF6-Q9BR77;A residues:300 303 304 305 306 307 308 309 310 311 312 313 314 315 316 317 318 319 320 321 322 323 324 325 326 327 328 329 330 331 332 333 334 335 336 337 338 339 340 343 529 531 532 533 534 535 536 537 538 539 540 541 542 543 544 545 546 547 548 549 550 551 552 553 554 555 556 557 558 559 560 561 562 563 564 565 566 567 568 569 570 571 572 573 574 575 576 577 578 579 581 582 583 58…	foldxDdg:0.314324;plddt:45.53	0.313	NC_000012.12:g.438517T>C	12p13.33	ClinGen-CA6380197|UniProt-VAR_029839|1000Genomes-rs735295;MAF:0.3229|ESP-rs735295|ExAC-rs735295|TOPMed-rs735295|dbSNP-rs735295|gnomAD-rs735295	N/A	[Met>Ile;NC_000012.12:g.438518G>A;12p13.33;ClinGen-CA383640085|ExAC-rs746796858|TOPMed-rs746796858|ClinGen-CA383640086|ClinGen-CA6380198]	N/A
rs17580	T	A	0.6396(PATHOGENIC)	-8.154	N/A	SERPINA1	gAa/gUa	-	32	[ENSP00000376802.4(ENST00000393087.9), ENSP00000408474.1(ENST00000437397.5), ENSP00000376803.4(ENST00000393088.8), ENSP00000416354.3(ENST00000449399.7), ENSP00000385960.4(ENST00000404814.8), ENSP00000390299.1(ENST00000440909.5), ENSP00000416066.1(ENST00000448921.5), ENSP00000348068.4(ENST00000355814.8), ENSP00000490054.1(ENST00000636712.1)]	N/A	P01009	E9KL23;288;Glu/Val;missense;[ENSP00000408474.1(ENST00000437397.5), ENSP00000376802.4(ENST00000393087.9), ENSP00000376803.4(ENST00000393088.8), ENSP00000416354.3(ENST00000449399.7), ENSP00000385960.4(ENST00000404814.8), ENSP00000390299.1(ENST00000440909.5), ENSP00000416066.1(ENST00000448921.5), ENSP00000348068.4(ENST00000355814.8), ENSP00000490054.1(ENST00000636712.1)]|P01009-2;288;Glu/Val;missens…	Alpha-1-antitrypsin	288	Glu/Val	missense	N/A	CHAIN-Alpha-1-antitrypsin;Range:25-418(PubMed:[6093867])|HELIX;Range:284-290(PDB:[3NDD])	Evidence at protein level	418	2024-01-24	1996-10-01	N/A	Interacts with CELA2A (PubMed:31358993)	Secreted;Endoplasmic reticulum|Secreted, extracellular space, extracellular matrix	Belongs to the serpin family	Q9Y282(ERGIC3);Q8N7X4(MAGEB6);P01009(SERPINA1);P43307(SSR1);O15393(TMPRSS2);P00772(CELA1);P71213(espB);P00760(PRSS1)	pocket_id:1;rad_gyration:5.689733;energy_per_vol:0.371659;buriedness:0.800283;resid:70 71 233 234 235 236 237 238 279 280 281 282 283 284 285 288 391 392 393 394 411 413 414;mean_plddt:96.21391304347826;score:953.1719165836827	N/A	foldxDdg:2.17538;plddt:96.95	0.902	NC_000014.9:g.94380925T>A	14q32.13	ClinGen-CA127679|ClinVar-RCV000019569;Pathogenic|ClinVar-RCV000148878;Pathogenic|ClinVar-RCV000177031;Pathogenic|ClinVar-RCV000508742;Pathogenic|ClinVar-RCV000508836;Pathogenic|ClinVar-RCV000762932;Pathogenic|ClinVar-RCV000768544;Pathogenic|ClinVar-RCV000991136;Pathogenic|ClinVar-RCV001195102;Pathogenic|ClinVar-RCV002371777;Pathogenic|ClinVar-RCV002466248;Pathogenic|UniProt-VAR_007000|1000Genomes…	Alpha-1-antitrypsin deficiency (A1ATD)-(pubmed:[14522813,15685488,20301692,24121147]ClinVar:[RCV000148878,RCV000508742,RCV000508836,RCV000762932,RCV000768544])|Chronic pulmonary obstruction-(ClinVar:[RCV000762932])|Cystic fibrosis (CF)-(pubmed:[11280952,12394352,15789152,17761616,18197057,19888064,19914443,19914445,20301428,20605539,20675678,21422883,21938795,22475884,24014130,24598717,25431289,2…	N/A	6i3z;A267;3.1;X-ray diffraction|1oph;A264;2.3;X-ray diffraction|3ndd;A249;1.5;X-ray diffraction|4pyw;A274;1.91;X-ray diffraction|1ezx;A241;2.6;X-ray diffraction|3ndf;A249;2.7;X-ray diffraction|1atu;A244;2.7;X-ray diffraction|1iz2;A264;2.2;X-ray diffraction|7npk;A274;1.83;X-ray diffraction|7npl;A274;1.82;X-ray diffraction|2qug;A264;2.0;X-ray diffraction|1hp7;A264;2.1;X-ray diffraction|6rod;A274;1.…
rs8017377	G	A	0.0615(BENIGN)	-3.368	N/A	NYNRIN	Gcu/Acu	+	0.38	[ENSP00000371994.3(ENST00000382554.4)]	N/A	Q9P2P1	Q9P2P1-1;978;Ala/Thr;missense;[ENSP00000371994.3(ENST00000382554.4)]	Protein NYNRIN	978	Ala/Thr	missense	N/A	CHAIN-Protein NYNRIN;Range:1-1898|REGION-Disordered;Range:968-1019(SAM:[MobiDB-lite])	Evidence at transcript level	1898	2024-03-27	2008-01-15	N/A	N/A	Membrane(Multi-pass membrane protein)	N/A	N/A	pocket_id:13;rad_gyration:6.194142;energy_per_vol:0.335601;buriedness:0.749705;resid:391 392 393 394 395 396 397 977 978 979 980 981;mean_plddt:33.625;score:75.44861216951925	N/A	N/A	0.554	NC_000014.9:g.24414681G>A	14q12	ClinGen-CA7137148|UniProt-VAR_037859|1000Genomes-rs8017377;MAF:0.2444|ESP-rs8017377|ExAC-rs8017377|TOPMed-rs8017377|dbSNP-rs8017377|gnomAD-rs8017377	N/A	N/A	N/A
rs150952015	G	T	N/A	N/A	N/A	RORA	gCg/gAg	-	19.44	[ENSP00000402971.2(ENST00000449337.6)]	N/A	A0A0C4DG53	A0A0C4DG53;8;Ala/Glu;missense;[ENSP00000402971.2(ENST00000449337.6)]	RAR related orphan receptor A	8	Ala/Glu	missense	N/A	N/A	N/A	N/A	N/A	N/A	N/A	N/A	N/A	N/A	N/A	N/A	N/A	N/A	N/A	N/A	N/A	N/A	N/A	N/A	N/A
rs11076256	C	T	0.1265(BENIGN)	-8.372	N/A	GOT2	Ggu/Agu	-	23	[ENSP00000245206.5(ENST00000245206.10)]	N/A	P00505	P00505-2;145;Gly/Ser;missense;[ENSP00000394100.2(ENST00000434819.2)]|P00505-1;188;Gly/Ser;missense;[ENSP00000245206.5(ENST00000245206.10)]	Aspartate aminotransferase, mitochondrial	188	Gly/Ser	missense	N/A	CHAIN-Aspartate aminotransferase, mitochondrial;Range:30-430	Evidence at protein level	430	2024-01-24	2010-10-05	RHEA:21824(PubMed:[26902786,31422819])|RHEA:65560(UniProtKB:[P00507])	Homodimer	Mitochondrion matrix;Cell membrane	Belongs to the class-I pyridoxal-phosphate-dependent aminotransferase family	N/A	pocket_id:2;rad_gyration:8.10452;energy_per_vol:0.410487;buriedness:0.819401;resid:183 184 185 186 187 188 189 190 191 218 219 220 221 222 223 225 369 370 371 372 373 375 376 377 378 384 385 386 387 390 429;mean_plddt:97.66709677419354;score:961.3386367009165	N/A	foldxDdg:0.634103;plddt:97.86	0.869	NC_000016.10:g.58718562C>T	16q21	ClinGen-CA8091019|UniProt-VAR_031710|1000Genomes-rs11076256;MAF:0.04613|ESP-rs11076256|ExAC-rs11076256|TOPMed-rs11076256|dbSNP-rs11076256|gnomAD-rs11076256	N/A	[Gly>Asp;NC_000016.10:g.58718561C>T;16q21;ClinGen-CA8091018|ExAC-rs779326369|gnomAD-rs779326369]	5ax8;A159,B159,C159,D159;2.99;X-ray diffraction
rs1800777	G	A	0.0644(BENIGN)	-2.457	N/A	CETP	cGa/cAa	+	0.45	[ENSP00000200676.3(ENST00000200676.8)]	N/A	P11597	H3BRJ9;403;Arg/Gln;missense;[ENSP00000456276.1(ENST00000566128.1)]|P11597-1;468;Arg/Gln;missense;[ENSP00000200676.3(ENST00000200676.8)]|A0A0S2Z3F6;468;Arg/Gln;missense;[ENSP00000200676.3(ENST00000200676.8)]|P11597-2;408;Arg/Gln;missense;[ENSP00000369106.2(ENST00000379780.6)]|A0A0S2Z3I8;408;Arg/Gln;missense;[ENSP00000369106.2(ENST00000379780.6)]	Cholesteryl ester transfer protein	468	Arg/Gln	missense	N/A	CHAIN-Cholesteryl ester transfer protein;Range:18-493|STRAND;Range:458-468(PDB:[2OBD])	Evidence at protein level	493	2024-01-24	2005-07-19	RHEA:43348(PubMed:[24293641])|RHEA:43352(PubMed:[24293641,3281933])|RHEA:43356(PubMed:[3281933])	N/A	Secreted	Belongs to the BPI/LBP/Plunc superfamily	N/A	pocket_id:3;rad_gyration:7.989665;energy_per_vol:0.369982;buriedness:0.76988;resid:352 353 354 355 388 389 390 391 392 393 394 395 398 400 456 458 459 460 461 462 463 464 465 466 467 468 472;mean_plddt:97.50333333333334;score:884.4366254636182|pocket_id:18;rad_gyration:3.697642;energy_per_vol:0.348357;buriedness:0.787611;resid:270 271 272 273 274 275 276 279 466 468 471 473 474 475;mean_plddt:97.…	N/A	foldxDdg:0.566777;plddt:97.96	0.532	NC_000016.10:g.56983407G>A	16q13	ClinGen-CA8071376|ClinVar-RCV000403096;Benign|ClinVar-RCV001723907;Benign|UniProt-VAR_013922|1000Genomes-rs1800777;MAF:0.02636|ESP-rs1800777|ExAC-rs1800777|TOPMed-rs1800777|dbSNP-rs1800777|gnomAD-rs1800777	Hyperalphalipoproteinemia 1 (HALP1)-(ClinVar:[RCV000403096])	[Arg>Ter;NC_000016.10:g.56983406C>T;16q13;ClinGen-CA8071375|cosmic curated-COSM1709208|ClinVar-RCV000338528;Variant of uncertain significance|ClinVar-RCV002521057;Variant of uncertain significance|1000Genomes-rs577301331;MAF:2.0E-4|ExAC-rs577301331|TOPMed-rs577301331|dbSNP-rs577301331|gnomAD-rs577301331]	4ews;A451;2.59;X-ray diffraction|2obd;A451;2.1;X-ray diffraction|4f2a;A451;3.11;X-ray diffraction
rs36049418	G	A	0.0781(BENIGN)	-5.229	N/A	SLC12A3	Gca/Aca	+	0.32	[ENSP00000456149.2(ENST00000563236.6)]	N/A	P55017	J3QSS1;727;Ala/Thr;missense;[ENSP00000262502.5(ENST00000262502.5)]|P55017-3;727;Ala/Thr;missense;[ENSP00000457552.1(ENST00000566786.5)]|P55017-1;728;Ala/Thr;missense;[ENSP00000456149.2(ENST00000563236.6)]|P55017-2;728;Ala/Thr;missense;[ENSP00000402152.2(ENST00000438926.6)]	Solute carrier family 12 member 3	728	Ala/Thr	missense	N/A	CHAIN-Solute carrier family 12 member 3;Range:1-1021|TOPO_DOM-Cytoplasmic;Range:607-1021(PubMed:[36351028,36792826]PDB:[7Y6I,8FHN,8FHO,8FHP,8FHQ,8FHR,8FHT])	Evidence at protein level	1021	2024-01-24	2010-11-30	RHEA:73887(PubMed:[36351028,36792826])	Homodimer (PubMed:36351028, PubMed:36792826)	Cell membrane;Apical cell membrane(Multi-pass membrane protein;Multi-pass membrane protein)	Belongs to the SLC12A transporter family	N/A	pocket_id:26;rad_gyration:4.79175;energy_per_vol:0.407209;buriedness:0.811787;resid:636 641 644 724 725 726 727 728 729 730 731 733 734 735 736 766 767 768 769 770 1011 1013;mean_plddt:91.35136363636364;score:834.7295132889045|pocket_id:41;rad_gyration:3.620639;energy_per_vol:0.355947;buriedness:0.789773;resid:628 671 673 708 709 710 727 728 729 730 733 734;mean_plddt:92.42416666666668;score:596.…	N/A	foldxDdg:1.89029;plddt:93.83	0.64	NC_000016.10:g.56887928G>A	16q13	ClinGen-CA8069786|ClinVar-RCV000455191;Benign|ClinVar-RCV001120452;Benign|ClinVar-RCV001520029;Benign|UniProt-VAR_007123|1000Genomes-rs36049418;MAF:0.00599|ESP-rs36049418|ExAC-rs36049418|TOPMed-rs36049418|dbSNP-rs36049418|gnomAD-rs36049418	Familial hypokalemia-hypomagnesemia (GTLMNS)-(pubmed:[21343949]ClinVar:[RCV001120452])	[Ala>Ser;NC_000016.10:g.56887928G>T;16q13;ClinGen-CA395994541|1000Genomes-rs36049418;MAF:0.00599|ESP-rs36049418|ExAC-rs36049418|TOPMed-rs36049418|gnomAD-rs36049418][Ala>Val;NC_000016.10:g.56887929C>T;16q13;ClinGen-CA8069787|ExAC-rs765401354|gnomAD-rs765401354]	7yg0;B728,A728;3.75;Electron Microscopy|7yg1;B728,A728;3.77;Electron Microscopy|8fho;B799,A799;2.95;Electron Microscopy|8fhn;B799,A799;3.0;Electron Microscopy
rs41278174	G	A	0.1518(BENIGN)	-7.194	N/A	ABCC6	Cgg/Ugg	-	25.8	[ENSP00000205557.7(ENST00000205557.12)]	N/A	O95255	O95255-1;1064;Arg/Trp;missense;[ENSP00000205557.7(ENST00000205557.12)]|A0A8C8Q0G8;1064;Arg/Trp;missense;[ENSP00000483331.2(ENST00000622290.5)]	ATP-binding cassette sub-family C member 6	1064	Arg/Trp	missense	N/A	CHAIN-ATP-binding cassette sub-family C member 6;Range:1-1503|TRANSMEM-Helical; Name=14;Range:1062-1082(PROSITE-ProRule:[PRU00441])|DOMAIN-ABC transmembrane type-1 2;Range:947-1228(PROSITE-ProRule:[PRU00441])	Evidence at protein level	1503	2024-03-27	2009-11-24	RHEA:19121(PubMed:[11880368,12414644])|RHEA:38963(PubMed:[11880368,12414644])	N/A	Basal cell membrane(Multi-pass membrane protein)|Basolateral cell membrane(Multi-pass membrane protein)|Endoplasmic reticulum membrane(Single-pass membrane protein)	Belongs to the ABC transporter superfamily	N/A	pocket_id:18;rad_gyration:4.276268;energy_per_vol:0.428083;buriedness:0.882243;resid:473 474 477 480 481 484 525 526 528 529 532 533 586 589 1006 1009 1010 1053 1056 1057 1058 1060 1061 1064;mean_plddt:87.63625;score:932.0631552700745|pocket_id:64;rad_gyration:3.43356;energy_per_vol:0.351021;buriedness:0.780186;resid:532 536 586 1061 1062 1064 1065 1068 1069 1218 1221 1222 1225;mean_plddt:86.0515…	N/A	foldxDdg:-0.530418;plddt:91.89	0.686	NC_000016.10:g.16165739G>A	16p13.11	ClinGen-CA7925664|ClinVar-RCV000499197;Benign|ClinVar-RCV001523288;Benign|ClinVar-RCV001529995;Benign|ClinVar-RCV002253480;Benign|ClinVar-RCV002253481;Benign|ClinVar-RCV002489226;Benign|UniProt-VAR_067889|1000Genomes-rs41278174;MAF:0.01158|ESP-rs41278174|ExAC-rs41278174|TOPMed-rs41278174|dbSNP-rs41278174|gnomAD-rs41278174	Arterial calcification, generalized, of infancy, 2-(pubmed:[25392903]ClinVar:[RCV002253481,RCV002489226])|Pseudoxanthoma elasticum (PXE)-(pubmed:[20301292]ClinVar:[RCV000499197,RCV002489226])|Pseudoxanthoma elasticum, forme fruste-(pubmed:[20301292]ClinVar:[RCV002253480,RCV002489226])	[Arg>Pro;NC_000016.10:g.16165738C>G;16p13.11;ClinGen-CA7925663|ExAC-rs774796759|TOPMed-rs774796759|gnomAD-rs774796759][Arg>Gln;NC_000016.10:g.16165738C>T;16p13.11;ClinGen-CA278633018|ExAC-rs774796759|TOPMed-rs774796759|gnomAD-rs774796759]	N/A
rs4988483	C	A	0.2089(BENIGN)	-6.848	N/A	SSTR5	Cug/Aug	+	20.3	[ENSP00000293897.4(ENST00000293897.6), ENSP00000508487.1(ENST00000689027.1)]	N/A	P35346	N/A	Somatostatin receptor type 5	48	Leu/Met	missense	N/A	CHAIN-Somatostatin receptor type 5;Range:1-364|TRANSMEM-Helical; Name=1;Range:39-66()	Evidence at protein level	364	2024-01-24	2000-12-01	N/A	Heterodimer with SSTR2	Cell membrane(Multi-pass membrane protein)	Belongs to the G-protein coupled receptor 1 family	P30872(SSTR1);P30874(SSTR2);P31391(SSTR4)	N/A	N/A	foldxDdg:-0.0908872;plddt:95.86	0.434	NC_000016.10:g.1079010C>A	16p13.3	ClinGen-CA7798635|UniProt-VAR_029223|1000Genomes-rs4988483;MAF:0.02137|ESP-rs4988483|ExAC-rs4988483|TOPMed-rs4988483|dbSNP-rs4988483|gnomAD-rs4988483	N/A	N/A	N/A
rs111653425	C	T	0.1488(BENIGN)	-5.642	N/A	SLC47A1	gCc/gUc	+	22.3	[ENSP00000270570.4(ENST00000270570.8)]	N/A	Q96FL8	Q96FL8-1;465;Ala/Val;missense;[ENSP00000270570.4(ENST00000270570.8)]|Q96FL8-3;465;Ala/Val;missense;[ENSP00000378951.1(ENST00000395585.5)]	Multidrug and toxin extrusion protein 1	465	Ala/Val	missense	N/A	CHAIN-Multidrug and toxin extrusion protein 1;Range:1-570|TOPO_DOM-Cytoplasmic;Range:459-546()	Evidence at protein level	570	2024-01-24	2001-12-01	RHEA:71271(PubMed:[17509534,24961373])|RHEA:72139(PubMed:[17509534])|RHEA:72183(PubMed:[17509534])|RHEA:72127(PubMed:[21128598])	N/A	Cell membrane;Apical cell membrane(Multi-pass membrane protein;Multi-pass membrane protein)	Belongs to the multi antimicrobial extrusion (MATE) (TC 2	Q9H0Q3(FXYD6)	pocket_id:2;rad_gyration:8.38292;energy_per_vol:0.367339;buriedness:0.815268;resid:99 257 258 259 261 262 265 402 403 404 405 406 407 456 460 461 463 464 465 467 468 470 471 472 475 477 478 479 482 523 524 525 526 527 528 529 530 531 532;mean_plddt:73.32102564102564;score:973.8589722360858|pocket_id:15;rad_gyration:3.411938;energy_per_vol:0.38625;buriedness:0.815789;resid:402 403 404 407 455 456 …	N/A	foldxDdg:0.240584;plddt:97.47	0.612	NC_000017.11:g.19571562C>T	17p11.2	ClinGen-CA8442528|1000Genomes-rs111653425;MAF:0.002196|ESP-rs111653425|ExAC-rs111653425|TOPMed-rs111653425|gnomAD-rs111653425	N/A	N/A	N/A
rs1136201	A	G	0.1335(BENIGN)	-4.554	N/A	ERBB2	Auc/Guc	+	19.08	[ENSP00000269571.4(ENST00000269571.10)]	N/A	P04626	J3QLU9;655;Ile/Val;missense;[ENSP00000463714.1(ENST00000584450.5)]|J3KTI5;24;Ile/Val;missense;[ENSP00000463002.1(ENST00000580074.1)]|P04626-4;640;Ile/Val;missense;[ENSP00000446466.1(ENST00000541774.5)]|X5DNK3;655;Ile/Val;missense;[ENSP00000269571.4(ENST00000269571.10)]|P04626-5;625;Ile/Val;missense;[ENSP00000385185.2(ENST00000406381.6), ENSP00000462438.1(ENST00000584601.5)]|J3QRJ7;95;Ile/Val;miss…	Receptor tyrosine-protein kinase erbB-2	655	Ile/Val	missense	N/A	CHAIN-Receptor tyrosine-protein kinase erbB-2;Range:23-1255|TRANSMEM-Helical;Range:653-675()|HELIX;Range:651-678(PDB:[2JWA])	Evidence at protein level	1255	2024-01-24	1987-08-13	RHEA:10596(PROSITE-ProRule:[PRU10028]PubMed:[21454582])	Homodimer (PubMed:21454582)	Cell membrane;Cell projection, ruffle membrane(Single-pass type I membrane protein;Single-pass type I membrane protein)|Cell membrane;Early endosome;Cytoplasm, perinuclear region;Nucleus(Single-pass type I membrane protein)|Cytoplasm;Nucleus|Cytoplasm;Nucleus	Belongs to the protein kinase superfamily	P00519(ABL1);P42684(ABL2);P15309(ACP3);P60709(ACTB);Q92625(ANKS1A);O00213(APBB1);O75815(BCAR3);Q9HB71(CACYBP);Q16543(CDC37);Q9NSE2(CISH);Q7Z7G1(CLNK);P46109(CRKL);Q93034(CUL5);Q99704(DOK1);Q8TEW6(DOK4);Q15075(EEA1);P98172(EFNB1);P00533(EGFR);P04626(ERBB2);P21860(ERBB3);Q15303(ERBB4);Q9UJM3(ERRFI1);P09769(FGR);P06241(FYN);O75791(GRAP2);P62993(GRB2);Q14451(GRB7);P07900(HSP90AA1);P08238(HSP90AB1);P1…	N/A	N/A	N/A	0.588	NC_000017.11:g.39723335A>G	17q12	ClinGen-CA123559|ClinVar-RCV000014887;MAF:0.12141;Pathogenic|ClinVar-RCV000120744;MAF:0.12141;Pathogenic|ClinVar-RCV001511302;MAF:0.12141;Pathogenic|ClinVar-RCV002464064;MAF:0.12141;Pathogenic|UniProt-VAR_004078|1000Genomes-rs1136201;MAF:0.1214|ESP-rs1136201|ExAC-rs1136201|TOPMed-rs1136201|dbSNP-rs1136201|gnomAD-rs1136201	ERBB2 POLYMORPHISM-(ClinVar:[RCV000014887])|Lung cancer-(pubmed:[29398453]ClinVar:[RCV002464064])	[Ile>Phe;NC_000017.11:g.39723335A>T;17q12;ClinGen-CA290439001|1000Genomes-rs1136201;MAF:0.1214|ESP-rs1136201|ExAC-rs1136201|TOPMed-rs1136201|gnomAD-rs1136201]	2n2a;A12,B12;0.0;Solution NMR|5ob4;B15,A15;0.0;Solution NMR|1qr1;C2,F2;2.4;X-ray diffraction|2jwa;B15,A15;0.0;Solution NMR|2ks1;A15;0.0;Solution NMR
rs12449858	G	A	0.3554(AMBIGUOUS)	-16.575	N/A	TMC6	Cuc/Uuc	-	26.5	[ENSP00000376260.2(ENST00000392467.7), ENSP00000466885.2(ENST00000592063.6), ENSP00000313408.2(ENST00000322914.7), ENSP00000468255.2(ENST00000589271.6), ENSP00000465261.1(ENST00000590602.6), ENSP00000513793.1(ENST00000698550.1)]	N/A	Q7Z403	K7ERH0;153;Leu/Phe;missense;[ENSP00000376260.2(ENST00000392467.7), ENSP00000466885.2(ENST00000592063.6), ENSP00000313408.2(ENST00000322914.7), ENSP00000468255.2(ENST00000589271.6), ENSP00000513793.1(ENST00000698550.1), ENSP00000465261.1(ENST00000590602.6)]|Q7Z403-2;153;Leu/Phe;missense;[ENSP00000306405.6(ENST00000306591.11)]|A0A8V8TLU9;153;Leu/Phe;missense;[ENSP00000513790.1(ENST00000698547.1)]|A…	Transmembrane channel-like protein 6	153	Leu/Phe	missense	N/A	CHAIN-Transmembrane channel-like protein 6;Range:1-805|TOPO_DOM-Lumenal;Range:1-209()	Evidence at protein level	805	2024-01-24	2005-12-06	N/A	Interacts with CIB1	Endoplasmic reticulum membrane(Multi-pass membrane protein)	Belongs to the TMC family	Q8WXH2(JPH3);P16284(PECAM1);P08670(VIM);Q8N680(ZBTB2)	pocket_id:52;rad_gyration:2.791494;energy_per_vol:0.620778;buriedness:0.930502;resid:98 101 102 105 106 109 145 148 149 152 153 155 156 164 168;mean_plddt:59.13266666666666;score:136.63828044361242	N/A	foldxDdg:0.199237;plddt:72.67	0.825	NC_000017.11:g.78125237G>A	17q25.3	ClinGen-CA8796117|ClinVar-RCV000455621;MAF:0.10503;Benign|ClinVar-RCV001517617;MAF:0.10503;Benign|ClinVar-RCV001662413;MAF:0.10503;Benign|UniProt-VAR_052336|1000Genomes-rs12449858;MAF:0.105|ESP-rs12449858|ExAC-rs12449858|TOPMed-rs12449858|dbSNP-rs12449858|gnomAD-rs12449858	Epidermodysplasia verruciformis-(pubmed:[26389258,26389333]ClinVar:[RCV001517617])	N/A	N/A
rs1292053	A	G	0.0684(BENIGN)	-0.46	N/A	TUBD1	aUg/aCg	-	15.21	[ENSP00000468518.1(ENST00000592426.5), ENSP00000320797.3(ENST00000325752.8)]	N/A	Q9UJT1	K7EQN9;76;Met/Thr;missense;[ENSP00000467915.1(ENST00000591548.5)]|K7EMW6;9;Met/Thr;missense;[ENSP00000466681.1(ENST00000593110.5)]|Q9UJT1-1;76;Met/Thr;missense;[ENSP00000468518.1(ENST00000592426.5), ENSP00000320797.3(ENST00000325752.8)]|Q9UJT1-2;76;Met/Thr;missense;[ENSP00000342399.5(ENST00000340993.10)]|Q9UJT1-5;76;Met/Thr;missense;[ENSP00000377785.3(ENST00000394239.7)]|Q9UJT1-6;76;Met/Thr;misse…	Tubulin delta chain	76	Met/Thr	missense	N/A	CHAIN-Tubulin delta chain;Range:1-453	Evidence at transcript level	453	2024-01-24	2007-01-23	N/A	Found in a complex with TEDC1, TEDC2, TUBE1 and TUBD1	Nucleus;Cytoplasm;Cytoplasm, cytoskeleton, microtubule organizing center, centrosome, centriole;Cell projection, cilium	Belongs to the tubulin family	N/A	pocket_id:19;rad_gyration:3.013032;energy_per_vol:0.419324;buriedness:0.83612;resid:54 60 76 77 78 80 81 86 87 88 89 90 91 92 93;mean_plddt:93.19733333333332;score:640.8737723089084|pocket_id:26;rad_gyration:3.022634;energy_per_vol:0.422376;buriedness:0.851145;resid:10 13 14 15 17 18 72 75 76 79 223 224 225 228;mean_plddt:96.37214285714286;score:553.9857014054281	Q9UJT0-Q9UJT1;A residues:1 2 3 37 38 39 40 42 43 60 61 70 133 134 135 136 137 138 139 140 164 167 168 169 170 171 172 173 203 204 205 269 270 271 272 273 274 275 276 277 278 279 280 281 282 283 284 285 286 287 288 289 290 291 292 293 294 295 296 297 299 315 316 317 318 319 320 343 344 345 346 347 348 349 352 353 354 355 356 357 358 359 360 361 362 363 364 365 366 367 368 372 373 374 375 376 377 3…	foldxDdg:1.97334;plddt:96.93	0.425	NC_000017.11:g.59886176A>G	17q23.1	ClinGen-CA8682631|UniProt-VAR_030000|1000Genomes-rs1292053;MAF:0.4812|ESP-rs1292053|ExAC-rs1292053|TOPMed-rs1292053|dbSNP-rs1292053|gnomAD-rs1292053	N/A	[Met>Ile;NC_000017.11:g.59886175C>T;17q23.1;ClinGen-CA8682630|ExAC-rs749489393|TOPMed-rs749489393|gnomAD-rs749489393]	N/A
rs1801689	A	C	0.9698(PATHOGENIC)	-16.85	N/A	APOH	Ugc/Ggc	-	26.3	[ENSP00000205948.6(ENST00000205948.11)]	N/A	P02749	A0A384NKM6;325;Cys/Gly;missense;[ENSP00000205948.6(ENST00000205948.11)]	Beta-2-glycoprotein 1	325	Cys/Gly	missense	N/A	CHAIN-Beta-2-glycoprotein 1;Range:20-345|REGION-Sushi-like;Range:263-345|DISULFID-;Range:300-325|DISULFID-;Range:307-345	Evidence at protein level	345	2024-01-24	1994-06-01	N/A	N/A	Secreted	N/A	P02749(APOH);P13473-2(LAMP2);P01130(LDLR);P08519(LPA);P11226(MBL2);P02776(PF4);P00747(PLG);Q9Y371(SH3GLB1);Q924X6(Lrp8);P02749(APOH);P02776(PF4)	pocket_id:5;rad_gyration:5.59176;energy_per_vol:0.336714;buriedness:0.747159;resid:295 311 312 313 314 315 316 317 319 320 321 322 323 324 325;mean_plddt:96.69266666666664;score:881.5936363233643|pocket_id:4;rad_gyration:5.608054;energy_per_vol:0.400068;buriedness:0.8151;resid:299 300 301 302 303 304 309 324 325 326 327 328 329 336 337 338 339 340;mean_plddt:89.87166666666667;score:867.1887275425…	N/A	foldxDdg:4.56783;plddt:94.14	1.0	NC_000017.11:g.66214462A>C	17q24.2	ClinGen-CA8720221|UniProt-VAR_008170;Benign|1000Genomes-rs1801689;MAF:0.01637|ESP-rs1801689|ExAC-rs1801689|TOPMed-rs1801689|dbSNP-rs1801689|gnomAD-rs1801689	N/A	[Cys>Phe;NC_000017.11:g.66214461C>A;17q24.2;ClinGen-CA8720220|ExAC-rs752860358|NCI-TCGA-rs752860358;MAF:3.988E-6|gnomAD-rs752860358][Cys>Arg;NC_000017.11:g.66214462A>G;17q24.2;ClinGen-CA8720222|1000Genomes-rs1801689;MAF:0.01637|ESP-rs1801689|ExAC-rs1801689|TOPMed-rs1801689|gnomAD-rs1801689]	2kri;A64;0.0;Solution NMR|6xsd;A306;2.54;X-ray diffraction|1c1z;A306;2.87;X-ray diffraction|7jik;A306;2.69;X-ray diffraction|6v08;A306;2.58;X-ray diffraction|6v09;A318;2.99;X-ray diffraction|4jhs;A160;3.0;X-ray diffraction|6xst;A306;2.92;X-ray diffraction|1qub;A306;2.7;X-ray diffraction|7kg4;B306,A306;3.3;X-ray diffraction|3op8;B64,A64;1.9;X-ray diffraction|6v06;A306;2.4;X-ray diffraction|1g4g;A6…
rs35985803	G	A	0.0703(BENIGN)	-5.074	N/A	ACAP1	Gca/Aca	+	16.85	[ENSP00000158762.3(ENST00000158762.8)]	N/A	Q15027	N/A	Arf-GAP with coiled-coil, ANK repeat and PH domain-containing protein 1	707	Ala/Thr	missense	N/A	CHAIN-Arf-GAP with coiled-coil, ANK repeat and PH domain-containing protein 1;Range:1-740|REGION-Required for interaction with GULP1;Range:405-740	Evidence at protein level	740	2024-01-24	1996-11-01	N/A	Banana-shaped homodimer laterally assembling into tetramers, the tetramers further pack helically onto the membrane	Recycling endosome membrane(Peripheral membrane protein)	N/A	O94868-3(FCHSD2);P62993(GRB2);Q92993(KAT5);Q8TAP4-4(LMO3);O76041(NEBL);P17252(PRKCA);Q15047-2(SETDB1);P14927(UQCRB);P22695(UQCRC2);P61981(YWHAG)	N/A	N/A	foldxDdg:0.00115272;plddt:56.94	0.55	NC_000017.11:g.7350996G>A	17p13.1	ClinGen-CA8344323|1000Genomes-rs35985803;MAF:0.04273|ESP-rs35985803|ExAC-rs35985803|TOPMed-rs35985803|gnomAD-rs35985803	N/A	N/A	3t9k;A335;2.3;X-ray diffraction
rs62623385	A	T	0.113(BENIGN)	-9.959	N/A	CNTROB	Aac/Uac	+	16.63	[ENSP00000456335.1(ENST00000563694.6)]	N/A	Q8N137	Q8N137-1;539;Asn/Tyr;missense;[ENSP00000456335.1(ENST00000563694.6)]|Q8N137-2;539;Asn/Tyr;missense;[ENSP00000369614.3(ENST00000380262.7)]|Q8N137-3;539;Asn/Tyr;missense;[ENSP00000454840.1(ENST00000565740.5)]	Centrobin	539	Asn/Tyr	missense	N/A	CHAIN-Centrobin;Range:1-903|REGION-Required for centrosome localization;Range:365-903|COILED;Range:196-560()	Evidence at protein level	903	2024-03-27	2002-10-01	N/A	Interacts with LYST	Cytoplasm, cytoskeleton, microtubule organizing center, centrosome, centriole	N/A	P27708(CAD);Q13057-2(COASY);Q2TBE0(CWF19L2);Q68J44(DUSP29);Q14241(ELOA);Q7L775(EPM2AIP1);Q96EZ8(MCRS1);Q96FA3(PELI1);Q96T60(PNKP);P54725(RAD23A);Q9UHP6(RSPH14);Q5T7P8-2(SYT6);Q15560(TCEA2);Q9NRE2(TSHZ2);Q5W5X9(TTC23)	N/A	N/A	foldxDdg:-0.0200282;plddt:86.25	0.498	NC_000017.11:g.7944519A>T	17p13.1	ClinGen-CA8365100|1000Genomes-rs62623385;MAF:0.01218|ESP-rs62623385|ExAC-rs62623385|TOPMed-rs62623385|gnomAD-rs62623385	N/A	N/A	N/A
rs871841	T	C	0.0398(BENIGN)	2.47	N/A	ARHGEF15	cUc/cCc	+	13.34	[ENSP00000412505.1(ENST00000421050.2), ENSP00000355026.3(ENST00000361926.8)]	N/A	O94989	J3QQS4;37;Leu/Pro;missense;[ENSP00000463875.1(ENST00000581809.1)]|A0A3B3IUF8;16;Leu/Pro;missense;[ENSP00000498197.1(ENST00000647883.1)]|A0A0S2Z547;277;Leu/Pro;missense;[ENSP00000412505.1(ENST00000421050.2), ENSP00000355026.3(ENST00000361926.8)]	Rho guanine nucleotide exchange factor 15	277	Leu/Pro	missense	N/A	CHAIN-Rho guanine nucleotide exchange factor 15;Range:1-841	Evidence at protein level	841	2024-01-24	2009-01-20	N/A	Interacts with EPHB2 (By similarity)	Cell projection, dendrite	N/A	Q53EZ4(CEP55);Q9H8Y8(GORASP2);Q13976-2(PRKG1)	N/A	N/A	N/A	0.666	NC_000017.11:g.8313150T>C	17p13.1	ClinGen-CA8374997|UniProt-VAR_054216|1000Genomes-rs871841;MAF:0.379|ESP-rs871841|ExAC-rs871841|TOPMed-rs871841|dbSNP-rs871841|gnomAD-rs871841	N/A	[Leu>Phe;NC_000017.11:g.8313149C>T;17p13.1;ClinGen-CA8374996|ExAC-rs764950333|gnomAD-rs764950333][Leu>His;NC_000017.11:g.8313150T>A;17p13.1;ClinGen-CA398016424|1000Genomes-rs871841;MAF:0.379|ESP-rs871841|ExAC-rs871841|TOPMed-rs871841|gnomAD-rs871841][Leu>Val;NC_000017.11:g.8313149C>G;17p13.1;ClinGen-CA8374995|ExAC-rs764950333|gnomAD-rs764950333]	N/A
rs2229616	C	T	0.0845(BENIGN)	-3.425	N/A	MC4R	Guc/Auc	-	18.52	[ENSP00000299766.3(ENST00000299766.5)]	N/A	P32245	N/A	Melanocortin receptor 4	103	Val/Ile	missense	N/A	CHAIN-Melanocortin receptor 4;Range:1-332|TRANSMEM-Helical; Name=2;Range:82-106()|HELIX;Range:78-106(PDB:[7PIU])	Evidence at protein level	332	2024-01-24	2004-10-25	N/A	Interacts with ATRNL1 (By similarity)	Cell membrane(Multi-pass membrane protein)	Belongs to the G-protein coupled receptor 1 family	Q8TCY5(MRAP)	pocket_id:2;rad_gyration:4.651916;energy_per_vol:0.398312;buriedness:0.83247;resid:10 11 14 100 103 104 106 107 108 109 110 111 112 113 114 115 118 119 122;mean_plddt:67.47210526315789;score:703.3201070498046|pocket_id:12;rad_gyration:3.074645;energy_per_vol:0.371632;buriedness:0.8157;resid:102 103 106 107 109 110 114 117 118 121;mean_plddt:76.44699999999999;score:347.24055208824814	N/A	foldxDdg:-0.857896;plddt:84.59	0.435	NC_000018.10:g.60372043C>T	18q21.32	ClinGen-CA214825|ClinVar-RCV000202600;Pathogenic|ClinVar-RCV000445452;Pathogenic|ClinVar-RCV000768671;Pathogenic|ClinVar-RCV000768672;Pathogenic|ClinVar-RCV001699064;Pathogenic|ClinVar-RCV001778791;Pathogenic|ClinVar-RCV002057039;Pathogenic|UniProt-VAR_010707|1000Genomes-rs2229616;MAF:0.01617|ESP-rs2229616|ExAC-rs2229616|TOPMed-rs2229616|dbSNP-rs2229616|gnomAD-rs2229616	BODY MASS INDEX QUANTITATIVE TRAIT LOCUS 20 (BMIQ20)-(ClinVar:[RCV001778791])|MELANOCORTIN 4 RECEPTOR POLYMORPHISM-(ClinVar:[RCV000768671])|Monogenic diabetes-(ClinVar:[RCV000445452])|OBESITY, RESISTANCE TO-(ClinVar:[RCV000768672])|Obesity-(pubmed:[28359099]ClinVar:[RCV000202600])	[Val>Ala;NC_000018.10:g.60372042A>G;18q21.32;NCI-TCGA-TCGA novel]	7aue;A103;2.97;Electron Microscopy|7f54;E105;3.0;Electron Microscopy|7f55;E105;3.1;Electron Microscopy|7f53;E105;3.0;Electron Microscopy|7f58;A105;3.1;Electron Microscopy|7piv;A111;2.86;Electron Microscopy|6w25;A115;2.75;X-ray diffraction|7piu;A111;2.58;Electron Microscopy
rs41301139	G	A	0.1828(BENIGN)	-7.682	N/A	SLC14A2	cGc/cAc	+	27.9	[ENSP00000465953.1(ENST00000586448.5), ENSP00000255226.5(ENST00000255226.11)]	N/A	Q15849	Q15849-1;896;Arg/His;missense;[ENSP00000465953.1(ENST00000586448.5), ENSP00000255226.5(ENST00000255226.11)]	Urea transporter 2	896	Arg/His	missense	N/A	CHAIN-Urea transporter 2;Range:1-920	Evidence at protein level	920	2024-03-27	2010-03-23	RHEA:32799(PubMed:[11502588,17702749])|RHEA:32799(PubMed:[8647271,8997401])	Interacts with SNAPIN which enhances its urea transport activity	Apical cell membrane;Cell membrane(Multi-pass membrane protein;Multi-pass membrane protein)	Belongs to the urea transporter family	Q8WVX3-2(C4orf3);Q96FZ5(CMTM7);Q08426(EHHADH);O43561-2(LAT);Q7Z4F1(LRP10);P26678(PLN);Q04941(PLP2);Q96IW7(SEC22A);Q5BJF2(TMEM97);P01375(TNF);A5PKU2(TUSC5);O95183(VAMP5);O95295(SNAPIN)	N/A	Q15849-Q8WVX3;A residues:736 737 738 739 740 741 742 743 744 745 746 747 748 749 768 772 776 777 778 779 780 781 782 783 784 785 786 787 788 789 790 791 792 794 795 800 803 804 816 820 821 825 826 827 828 829 830 831 832 833 834 835 836 839 880 896;B residues:50 51 52 53 54 55 56 57 58 59 60 61 62 63 64 65 66;pDockQ:0.255285	foldxDdg:0.771091;plddt:96.3	0.73	NC_000018.10:g.45682443G>A	18q12.3	ClinGen-CA8947170|1000Genomes-rs41301139;MAF:0.005192|ESP-rs41301139|ExAC-rs41301139|TOPMed-rs41301139|gnomAD-rs41301139	N/A	[Arg>Cys;NC_000018.10:g.45682442C>T;18q12.3;ClinGen-CA8947168|NCI-TCGA Cosmic-COSM2877443|ESP-rs201444739|ExAC-rs201444739|NCI-TCGA-rs201444739;MAF:1.591E-5|TOPMed-rs201444739|gnomAD-rs201444739][Arg>Gly;NC_000018.10:g.45682442C>G;18q12.3;ClinGen-CA8947169|ESP-rs201444739|ExAC-rs201444739|TOPMed-rs201444739|gnomAD-rs201444739][Arg>Leu;NC_000018.10:g.45682443G>T;18q12.3;ClinGen-CA8947171|1000Genom…	N/A
rs77960347	A	G	0.1088(BENIGN)	-4.977	N/A	LIPG	aAc/aGc	+	23.9	[ENSP00000261292.4(ENST00000261292.9)]	N/A	Q9Y5X9	B4DTR8;322;Asn/Ser;missense;[ENSP00000387978.2(ENST00000427224.6)]|Q9Y5X9-1;396;Asn/Ser;missense;[ENSP00000261292.4(ENST00000261292.9)]	Endothelial lipase	396	Asn/Ser	missense	N/A	CHAIN-Endothelial lipase;Range:21-500|DOMAIN-PLAT;Range:347-482(PROSITE-ProRule:[PRU00152])	Evidence at protein level	500	2024-01-24	1999-11-01	RHEA:12044(PubMed:[10192396,10318835,12032167])|RHEA:18689(PubMed:[12032167])|RHEA:38575(PubMed:[12032167])|RHEA:40475(PubMed:[12032167])|RHEA:41384(PubMed:[12032167])	Head to tail homodimer	Secreted	Belongs to the AB hydrolase superfamily	N/A	pocket_id:3;rad_gyration:4.257775;energy_per_vol:0.512717;buriedness:0.879828;resid:304 305 306 307 352 384 385 386 387 388 389 390 391 394 395 396 397 398 399;mean_plddt:90.41736842105264;score:942.890714086971	N/A	foldxDdg:2.35981;plddt:93.08	0.487	NC_000018.10:g.49583585A>G	18q21.1	ClinGen-CA8959333|1000Genomes-rs77960347;MAF:0.004792|ESP-rs77960347|ExAC-rs77960347|TOPMed-rs77960347|gnomAD-rs77960347	N/A	[Asn>Thr;NC_000018.10:g.49583585A>C;18q21.1;ClinGen-CA402422658|1000Genomes-rs77960347;MAF:0.004792|ESP-rs77960347|ExAC-rs77960347|TOPMed-rs77960347|gnomAD-rs77960347]	N/A
rs78626055	A	G	0.3267(BENIGN)	-8.076	N/A	MYO5B	cUg/cCg	-	26.4	[ENSP00000285039.6(ENST00000285039.12)]	N/A	Q9ULV0	Q9ULV0-1;59;Leu/Pro;missense;[ENSP00000285039.6(ENST00000285039.12)]	Unconventional myosin-Vb	59	Leu/Pro	missense	N/A	CHAIN-Unconventional myosin-Vb;Range:1-1848|DOMAIN-Myosin N-terminal SH3-like;Range:8-60(PROSITE-ProRule:[PRU01190])	Evidence at protein level	1848	2024-01-24	2010-05-18	N/A	Component of the CART complex, at least composed of ACTN4, HGS/HRS, MYO5B and TRIM3	Cytoplasm	Belongs to the TRAFAC class myosin-kinesin ATPase superfamily	Q9Y2J4-4(AMOTL2);Q12982(BNIP2);P15884(TCF4);Q9BYV2(TRIM54);Q9Y2J4(AMOTL2);Q7L5A3(ATOSB);Q12982(BNIP2);Q5JST6(EFHC2);Q96IK5(GMCL1);A8MW99(MEI4);Q6FHY5(MEOX2);P62491(RAB11A);Q15907(RAB11B);P57735(RAB25);P15884-3(TCF4);O75382(TRIM3);Q9BYV2(TRIM54);O43257(ZNHIT1)	pocket_id:33;rad_gyration:4.071549;energy_per_vol:0.401913;buriedness:0.813084;resid:14 15 16 22 38 50 51 52 53 56 58 59 60 61;mean_plddt:83.91571428571429;score:723.3767859468122|pocket_id:20;rad_gyration:4.748841;energy_per_vol:0.350455;buriedness:0.753176;resid:1 2 3 6 7 31 56 57 58 59 60 61 62 78 79 80 81 691 750 751;mean_plddt:76.2755;score:664.2104001560239	N/A	foldxDdg:2.89424;plddt:83.71	0.974	NC_000018.10:g.50040277A>G	18q21.1	ClinGen-CA8961954|ClinVar-RCV000381499;Benign|ClinVar-RCV001515814;Benign|1000Genomes-rs78626055;MAF:0.01258|ESP-rs78626055|ExAC-rs78626055|TOPMed-rs78626055|dbSNP-rs78626055|gnomAD-rs78626055	Congenital microvillous atrophy (DIAR2)-(ClinVar:[RCV000381499])	N/A	N/A
rs1058402	G	A	N/A	N/A	N/A	PVR	Gcg/Acg	+	0.01	[ENSP00000516467.1(ENST00000706606.1)]	N/A	A0A9L9PXB8	A0A9L9PXB8;67;Ala/Thr;missense;[ENSP00000516467.1(ENST00000706606.1)]|A0A9L9PX39;67;Ala/Thr;missense;[ENSP00000516465.1(ENST00000706603.1)]|F8W7D4;41;Gly/Asp;missense;[ENSP00000187830.2(ENST00000187830.2)]|A0A0C4DG49;67;Ala/Thr;missense;[ENSP00000402060.2(ENST00000425690.8)]|P15151-3;67;Ala/Thr;missense;[ENSP00000340870.3(ENST00000344956.8)]|P15151-2;67;Ala/Thr;missense;[ENSP00000385344.3(ENST000…	PVR cell adhesion molecule	67	Ala/Thr	missense	N/A	N/A	N/A	N/A	N/A	N/A	N/A	N/A	N/A	N/A	N/A	N/A	N/A	N/A	N/A	N/A	N/A	N/A	N/A	N/A	N/A
rs1135062	A	G	0.0659(BENIGN)	-1.331	N/A	BCAM	Acc/Gcc	+	0.41	[ENSP00000270233.5(ENST00000270233.12)]	N/A	P50895	A0A087WXM8;539;Thr/Ala;missense;[ENSP00000481153.1(ENST00000611077.5)]	Basal cell adhesion molecule	539	Thr/Ala	missense	N/A	CHAIN-Basal cell adhesion molecule;Range:32-628|TOPO_DOM-Extracellular;Range:32-547()|DOMAIN-Ig-like C2-type 3;Range:448-541	Evidence at protein level	628	2024-01-24	2006-03-07	N/A	N/A	Membrane(Single-pass type I membrane protein)	N/A	O95198(KLHL2);Q07627(KRTAP1-1);Q8IUG1(KRTAP1-3);Q99750(MDFI);P0DPK4(NOTCH2NLC);Q9C029(TRIM7)	pocket_id:12;rad_gyration:4.517475;energy_per_vol:0.373241;buriedness:0.785249;resid:452 453 454 455 456 457 461 462 463 533 534 535 536 537 538 539;mean_plddt:78.11375;score:525.2854009813632	N/A	foldxDdg:0.198525;plddt:74.52	0.583	NC_000019.10:g.44819487A>G	19q13.32	ClinGen-CA114286|ClinVar-RCV000000468;MAF:0.27037;Benign|ClinVar-RCV002496219;MAF:0.27037;Benign|UniProt-VAR_021354|1000Genomes-rs1135062;MAF:0.2704|ESP-rs1135062|ExAC-rs1135062|TOPMed-rs1135062|dbSNP-rs1135062|gnomAD-rs1135062	LuLu phenotype-(ClinVar:[RCV002496219])	[Thr>Ser;NC_000019.10:g.44819488C>G;19q13.32;ClinGen-CA406291629|Ensembl-rs1568574692]	N/A
rs12975366	T	C	0.2209(BENIGN)	-6.148	N/A	LILRB5	gAu/gGu	-	22.2	[ENSP00000320390.5(ENST00000316219.9)]	N/A	O75023	O75023-1;247;Asp/Gly;missense;[ENSP00000320390.5(ENST00000316219.9)]|O75023-2;147;Asp/Gly;missense;[ENSP00000263430.8(ENST00000345866.10)]|O75023-3;247;Asp/Gly;missense;[ENSP00000406478.1(ENST00000449561.3)]	Leukocyte immunoglobulin-like receptor subfamily B member 5	247	Asp/Gly	missense	N/A	CHAIN-Leukocyte immunoglobulin-like receptor subfamily B member 5;Range:24-590|TOPO_DOM-Extracellular;Range:24-458()|DOMAIN-Ig-like C2-type 3;Range:224-313|DISULFID-;Range:244-295(PROSITE-ProRule:[PRU00114])	Evidence at protein level	590	2024-01-24	2022-02-23	N/A	N/A	Membrane(Single-pass type I membrane protein)	N/A	N/A	pocket_id:23;rad_gyration:3.539681;energy_per_vol:0.35613;buriedness:0.796296;resid:222 223 224 225 227 245 246 247 248 275 310;mean_plddt:94.94363636363636;score:522.7100246135474	N/A	foldxDdg:0.0394338;plddt:93.53	0.642	NC_000019.10:g.54255498T>C	19q13.42	ClinGen-CA309429833|UniProt-VAR_061316|1000Genomes-rs12975366;MAF:0.2708|ESP-rs12975366|ExAC-rs12975366|TOPMed-rs12975366|dbSNP-rs12975366|gnomAD-rs12975366	N/A	[Asp>Ala;NC_000019.10:g.54255498T>G;19q13.42;ClinGen-CA309429834|1000Genomes-rs12975366;MAF:0.2708|ESP-rs12975366|ExAC-rs12975366|TOPMed-rs12975366|gnomAD-rs12975366]	N/A
rs142888784	C	G	0.082(BENIGN)	-5.137	N/A	KCNK6	Ccg/Gcg	+	18.33	[ENSP00000263372.2(ENST00000263372.5)]	N/A	Q9Y257	B2RDS2;52;Pro/Ala;missense;[ENSP00000263372.2(ENST00000263372.5)]|Q9Y257-1;52;Pro/Ala;missense;[ENSP00000263372.2(ENST00000263372.5)]	Potassium channel subfamily K member 6	52	Pro/Ala	missense	N/A	CHAIN-Potassium channel subfamily K member 6;Range:1-313	Evidence at protein level	313	2024-01-24	1999-11-01	N/A	Homodimer	Membrane(Multi-pass membrane protein)	Belongs to the two pore domain potassium channel (TC 1	N/A	N/A	N/A	foldxDdg:1.35301;plddt:90.14	0.402	NC_000019.10:g.38320104C>G	19q13.2	ClinGen-CA9412212|1000Genomes-rs142888784;MAF:0.005791|ESP-rs142888784|ExAC-rs142888784|TOPMed-rs142888784|gnomAD-rs142888784	N/A	[Pro>Leu;NC_000019.10:g.38320105C>T;19q13.2;ClinGen-CA9412213|ExAC-rs758075433|TOPMed-rs758075433|gnomAD-rs758075433][Pro>Gln;NC_000019.10:g.38320105C>A;19q13.2;ClinGen-CA308113942|ExAC-rs758075433|TOPMed-rs758075433|gnomAD-rs758075433]	N/A
rs1801272	A	T	0.8508(PATHOGENIC)	-11.845	N/A	CYP2A6	cUc/cAc	-	23.1	[ENSP00000301141.4(ENST00000301141.10)]	N/A	P11509	N/A	Cytochrome P450 2A6	160	Leu/His	missense	N/A	CHAIN-Cytochrome P450 2A6;Range:1-494|HELIX;Range:143-162(PDB:[2FDV])	Evidence at protein level	494	24/01/2024	18/09/2019	RHEA:49160(PubMed:[11695850])	N/A	Endoplasmic reticulum membrane;Microsome membrane(Peripheral membrane protein;Peripheral membrane protein)	Belongs to the cytochrome P450 family	N/A	pocket_id:12;rad_gyration:4.83991;energy_per_vol:0.32772;buriedness:0.75813;resid:155 156 158 159 160 162 163 173 176 190 191 192 193 194;mean_plddt:98.66571428571427;score:811.6528723875623	N/A	foldxDdg:3.18088;plddt:98.82	0.671	NC_000019.10:g.40848628A>T	19q13.2	ClinGen-CA215129|ClinVar-RCV000018482;MAF:0.00919|ClinVar-RCV000018483;MAF:0.00919|UniProt-VAR_001249;Benign|1000Genomes-rs1801272;MAF:0.009185|ESP-rs1801272|ExAC-rs1801272|TOPMed-rs1801272|dbSNP-rs1801272|gnomAD-rs1801272	Nicotine, poor metabolism of-(ClinVar:[RCV000018483])	[Leu>Ile;NC_000019.10:g.40848629G>T;19q13.2;ClinGen-CA9453092|ExAC-rs60563539|TOPMed-rs60563539|gnomAD-rs60563539]	1z10;D138,A138,B138,C138;1.9;X-ray diffraction|2fdy;B138,C138,A138,D138;1.95;X-ray diffraction|1z11;D138,C138,B138,A138;2.05;X-ray diffraction|3t3q;C138,B138,D138,A138;2.1;X-ray diffraction|3t3r;A138,D138,C138,B138;2.4;X-ray diffraction|4ejj;C143,B143,D143,A143;2.3;X-ray diffraction|3ebs;C138,D138,A138,B138;2.15;X-ray diffraction|4rui;B138,A138,D138,C138,F138,E138;2.61;X-ray diffraction|2fdu;A138…
rs202200760	G	C	0.1792(BENIGN)	-7.139	N/A	NR2F6	Ccg/Gcg	-	23.4	[ENSP00000291442.2(ENST00000291442.4)]	N/A	P10588	F1D8R3;132;Pro/Ala;missense;[ENSP00000291442.2(ENST00000291442.4)]|M0R175;12;Pro/Ala;missense;[ENSP00000471686.1(ENST00000596878.1)]	Nuclear receptor subfamily 2 group F member 6	132	Pro/Ala	missense	N/A	CHAIN-Nuclear receptor subfamily 2 group F member 6;Range:1-404	Evidence at protein level	404	24/01/2024	19/09/2002	N/A	Binds DNA as dimer; homodimer and heterodimer with NR2F2 and probably NR2F1 (By similarity)	Nucleus	Belongs to the nuclear hormone receptor family	P83916(CBX1);P55209(NAP1L1)	N/A	P10588-Q8WV16-2;A residues:130 131 132 133 273 274 276 280 283 284 286 287 288 290 291 294 295 313 314 315 321 322 325 340 346 347 348 349 350 351 352 353 354 355 356 357 358 359 360 361 362;B residues:139 140 181 182 184 185 205 208 233 234 235 236 237 238 239 240 241 258 260 262 271 290 292 293 294 295 296 297 298 299 312 313 314 315 316 317 319 334 335 336 353 354 380 381 400;pDockQ:0.277578	foldxDdg:0.721321;plddt:37.24	0.553	NC_000019.10:g.17236045G>C	19p13.11	ClinGen-CA9289757|1000Genomes-rs202200760;MAF:0.01637|ExAC-rs202200760|TOPMed-rs202200760|gnomAD-rs202200760	N/A	[Pro>Leu;NC_000019.10:g.17236044G>A;19p13.11;ClinGen-CA9289756|ExAC-rs764556511|TOPMed-rs764556511|gnomAD-rs764556511]	N/A
rs28469095	T	C	0.0484(BENIGN)	-3.414	N/A	NKPD1	Agg/Ggg	-	0.17	[ENSP00000468649.1(ENST00000589776.1)]	N/A	Q17RQ9	A0A7N4I390;788;Arg/Gly;missense;[ENSP00000321976.6(ENST00000317951.6), ENSP00000509174.1(ENST00000686631.1)]	NTPase KAP family P-loop domain-containing protein 1	566	Arg/Gly	missense	N/A	CHAIN-NTPase KAP family P-loop domain-containing protein 1;Range:1-610|REGION-Disordered;Range:540-587(SAM:[MobiDB-lite])	Evidence at transcript level	610	24/01/2024	25/07/2006	N/A	N/A	Membrane(Multi-pass membrane protein)	N/A	N/A	N/A	N/A	N/A	0.435	NC_000019.10:g.45152075T>C	19q13.32	ClinGen-CA9509503|1000Genomes-rs28469095;MAF:0.08267|ESP-rs28469095|ExAC-rs28469095|TOPMed-rs28469095|gnomAD-rs28469095	N/A	N/A	N/A
rs3208856	C	T	0.0891(BENIGN)	-6.167	N/A	CBLC	Cac/Uac	+	13.1	[ENSP00000494162.1(ENST00000647358.2)]	N/A	Q9ULV8	Q9ULV8-1;405;His/Tyr;missense;[ENSP00000494162.1(ENST00000647358.2)]|Q9ULV8-2;359;His/Tyr;missense;[ENSP00000340250.4(ENST00000341505.4)]	E3 ubiquitin-protein ligase CBL-C	405	His/Tyr	missense	N/A	CHAIN-E3 ubiquitin-protein ligase CBL-C;Range:1-474|REGION-Interaction with RET;Range:351-474(PubMed:[18753381])	Evidence at protein level	474	27/03/2024	06/02/2007	N/A	Interacts with ubiquitin-conjugating enzyme E2 UBE2D2 and UBE2D3	N/A	N/A	P54253(ATXN1);Q13148(TARDBP);P61086(UBE2K);P07947(YES1)	pocket_id:11;rad_gyration:5.296225;energy_per_vol:0.413531;buriedness:0.816856;resid:331 332 333 334 335 336 338 339 342 347 348 349 401 402 403 404 405 406 407 408;mean_plddt:69.05649999999999;score:531.456718756979	N/A	foldxDdg:0.253595;plddt:44.91	0.496	NC_000019.10:g.44793549C>T	19q13.32	ClinGen-CA9504108|UniProt-VAR_018298|1000Genomes-rs3208856;MAF:0.01937|ESP-rs3208856|ExAC-rs3208856|TOPMed-rs3208856|dbSNP-rs3208856|gnomAD-rs3208856	N/A	[His>Asp;NC_000019.10:g.44793549C>G;19q13.32;ClinGen-CA308901790|1000Genomes-rs3208856;MAF:0.01937|ESP-rs3208856|ExAC-rs3208856|TOPMed-rs3208856|gnomAD-rs3208856]	N/A
rs61751862	G	C	0.1162(BENIGN)	-2.617	N/A	SPHK2	gGc/gCc	+	22.1	[ENSP00000245222.3(ENST00000245222.9), ENSP00000469158.1(ENST00000598088.5)]	N/A	Q9NRA0	Q9NRA0-1;601;Gly/Ala;missense;[ENSP00000245222.3(ENST00000245222.9), ENSP00000469158.1(ENST00000598088.5)]|E9PCV4;395;Gly/Ala;missense;[ENSP00000341091.4(ENST00000340932.7)]|M0R344;565;Gly/Ala;missense;[ENSP00000472983.1(ENST00000599029.2)]|Q9NRA0-4;542;Gly/Ala;missense;[ENSP00000470092.1(ENST00000600537.5)]|Q9NRA0-2;565;Gly/Ala;missense;[ENSP00000471205.1(ENST00000599748.5)]	Sphingosine kinase 2	601	Gly/Ala	missense	N/A	CHAIN-Sphingosine kinase 2;Range:1-654	Evidence at protein level	654	27/03/2024	26/07/2002	RHEA:51496(PubMed:[10751414,12954646,19729656])|RHEA:35847(PubMed:[10751414])|RHEA:15465(UniProtKB:[Q9JIA7])|RHEA:33563(UniProtKB:[Q9JIA7])	Interacts with histone H3 (PubMed:19729656)	Cytoplasm;Nucleus;Endoplasmic reticulum;Mitochondrion inner membrane|Lysosome membrane	N/A	Q96CV9(OPTN)	pocket_id:15;rad_gyration:5.596716;energy_per_vol:0.374323;buriedness:0.803601;resid:378 395 396 397 398 399 400 401 532 533 534 570 572 596 597 598 599 600 601 602;mean_plddt:74.3305;score:542.7069173658681	N/A	foldxDdg:2.7886;plddt:96.1	0.494	NC_000019.10:g.48629610G>C	19q13.33	ClinGen-CA9554945|1000Genomes-rs61751862;MAF:0.004593|ESP-rs61751862|ExAC-rs61751862|TOPMed-rs61751862|gnomAD-rs61751862	N/A	[Gly>Asp;NC_000019.10:g.48629610G>A;19q13.33;ClinGen-CA9554946|1000Genomes-rs61751862;MAF:0.004593|ESP-rs61751862|ExAC-rs61751862|TOPMed-rs61751862|gnomAD-rs61751862]	N/A
rs7412	C	T	0.4222(AMBIGUOUS)	-7.556	N/A	APOE	Cgc/Ugc	+	26	[ENSP00000252486.3(ENST00000252486.9)]	N/A	P02649	E7ERP7;176;Arg/Cys;missense;[ENSP00000410423.1(ENST00000425718.1)]|E9PEV4;176;Arg/Cys;missense;[ENSP00000413135.1(ENST00000446996.5)]|H0Y7L5;202;Arg/Cys;missense;[ENSP00000413653.2(ENST00000434152.5)]|A0A0S2Z3D5;176;Arg/Cys;missense;[ENSP00000252486.3(ENST00000252486.9)]	Apolipoprotein E	176	Arg/Cys	missense	N/A	CHAIN-Apolipoprotein E;Range:19-317|REPEAT-5;Range:168-189|REGION-8 X 22 AA approximate tandem repeats;Range:80-255|HELIX;Range:149-180(PDB:[7FCR])	Evidence at protein level	317	24/01/2024	21/07/1986	N/A	Homotetramer (PubMed:8340399)|(Microbial infection) Interacts with hepatitis C virus (HCV) envelope glycoprotein E2; this interaction is required for HCV infectivity and production	Secreted;Secreted, extracellular space;Secreted, extracellular space, extracellular matrix;Extracellular vesicle;Endosome, multivesicular body	Belongs to the apolipoprotein A1/A4/E family	Q9UIJ7(AK3);Q06481-5(APLP2);P05067(APP);Q9HBG4(ATP6V0A4);Q9NUB4(C20orf141);Q16543(CDC37);P08603(CFH);Q9UBD9(CLCF1);Q8IUW6(CLSTN3);P26441(CNTF);Q9H6J7-2(CSTPP1);Q9H816(DCLRE1B);Q9BQ95(ECSIT);Q9Y6C2-2(EMILIN1);Q3SYB3(FOXD4L6);Q8IY40(GRIK2);O75409(H2AP);P00738(HP);Q9BYZ2(LDHAL6B);P01130(LDLR);P09382(LGALS1);Q07954(LRP1);Q14114(LRP8);Q14114-3(LRP8);P11137-4(MAP2);P10636-6(MAPT);Q9Y3D2(MSRB2);P02795(M…	pocket_id:11;rad_gyration:3.839655;energy_per_vol:0.4407;buriedness:0.840625;resid:110 111 112 114 115 171 172 175 176 177 179 180;mean_plddt:89.24416666666666;score:418.9394052987736	P02649-P02765;A residues:113 114 117 118 119 120 121 122 123 124 125 126 127 128 131 132 134 135 136 138 139 142 143 149 150 151 152 153 154 155 156 157 158 159 160 161 162 163 164 165 166 167 168 169 170 171 172 173 175 176;B residues:29 30 31 32 33 37 58 60 61 62 63 64 65 66 67 69 79 81 82 83 84 85 105 108 109 110 111 112 113 114 115 129 131 132 133 134 135 136 137 138 139 140 141 142 144 152 1…	foldxDdg:0.909564;plddt:90.57	0.905	NC_000019.10:g.44908822C>T	19q13.32	ClinGen-CA127498|ClinVar-RCV000019428;Pathogenic|ClinVar-RCV000019439;Pathogenic|ClinVar-RCV000019452;Pathogenic|ClinVar-RCV000019454;Pathogenic|ClinVar-RCV000211178;Pathogenic|ClinVar-RCV000346955;Pathogenic|ClinVar-RCV000845582;Pathogenic|ClinVar-RCV001262472;Pathogenic|ClinVar-RCV001529800;Pathogenic|UniProt-VAR_000664;Pathogenic|1000Genomes-rs7412;MAF:0.07508|ESP-rs7412|ExAC-rs7412|TOPMed-rs7…	Familial type 3 hyperlipoproteinemia-(pubmed:[22962670]ClinVar:[RCV000019428,RCV000019452,RCV000019454])|Hyperlipoproteinemia due to APOE1-(ClinVar:[RCV000019439])|Hyperlipoproteinemia 3 (HLPP3)-(pubmed:[1361196,1674745,2101409,22481068,2556398,26802169,2738044,7635945,8287539])	[Arg>His;NC_000019.10:g.44908823G>A;19q13.32;NCI-TCGA Cosmic-COSM5564745]	6iwb;C145,A145;2.5;X-ray diffraction|1b68;A158;2.0;X-ray diffraction|7fcr;A160;1.4;X-ray diffraction|7fcs;A160;1.6;X-ray diffraction|1lpe;A136;2.25;X-ray diffraction|7uvj;B140,A140;1.99;X-ray diffraction|1or3;A158;1.73;X-ray diffraction|1or2;A158;2.5;X-ray diffraction|1gs9;A158;1.7;X-ray diffraction|6v7m;B76;2.0;X-ray diffraction|2kc3;A159;0.0;Solution NMR|1nfo;A158;2.0;X-ray diffraction|1nfn;A15…
rs1800961	C	T	0.4275(AMBIGUOUS)	-7.959	N/A	HNF4A	aCu/aUu	+	21.4	[ENSP00000312987.3(ENST00000316099.10)]	N/A	P41235	P41235-1;139;Thr/Ile;missense;[ENSP00000312987.3(ENST00000316099.10)]|P41235-2;139;Thr/Ile;missense;[ENSP00000412111.1(ENST00000415691.2)]|P41235-3;139;Thr/Ile;missense;[ENSP00000410911.2(ENST00000443598.6)]|P41235-5;117;Thr/Ile;missense;[ENSP00000315180.4(ENST00000316673.9)]|P41235-6;117;Thr/Ile;missense;[ENSP00000396216.1(ENST00000457232.5)]|F1D8T1;139;Thr/Ile;missense;[ENSP00000312987.3(ENST00…	Hepatocyte nuclear factor 4-alpha	139	Thr/Ile	missense	N/A	CHAIN-Hepatocyte nuclear factor 4-alpha;Range:1-474	Evidence at protein level	474	24/01/2024	29/05/2007	N/A	Homodimerization is required for HNF4-alpha to bind to its recognition site (PubMed:14982928)	Nucleus	Belongs to the nuclear hormone receptor family	Q99967(CITED2);A8MYZ6(FOXO6);P04150(NR3C1);Q9UBK2(PPARGC1A);Q92786(PROX1);P23246(SFPQ);Q12772(SREBF2);P11532(DMD);O14602(EIF1AY);O43688(PLPP2)	N/A	N/A	foldxDdg:-0.116116;plddt:63.63	0.415	NC_000020.11:g.44413724C>T	20q13.12	ClinGen-CA153114|ClinVar-RCV000117238;Benign|ClinVar-RCV000280314;Benign|ClinVar-RCV000337755;Benign|ClinVar-RCV000445529;Benign|ClinVar-RCV001521057;Benign|ClinVar-RCV002226673;Benign|ClinVar-RCV002453432;Benign|UniProt-VAR_004669|1000Genomes-rs1800961;MAF:0.02396|ESP-rs1800961|ExAC-rs1800961|TOPMed-rs1800961|dbSNP-rs1800961|gnomAD-rs1800961	Familial hyperinsulinism-(pubmed:[20301549]ClinVar:[RCV000280314])|Maturity onset diabetes mellitus in young (MODY)-(pubmed:[29792621]ClinVar:[RCV002453432])|Maturity-onset diabetes of the young type 1-(pubmed:[29792621]ClinVar:[RCV000337755])|Monogenic diabetes-(ClinVar:[RCV000445529])|Type II diabetes mellitus-(pubmed:[20301750,22962670,23492873]ClinVar:[RCV002226673])	[Thr>Pro;NC_000020.11:g.44413723A>C;20q13.12;ClinGen-CA409105499|ExAC-rs779271027|gnomAD-rs779271027][Thr>Ala;NC_000020.11:g.44413723A>G;20q13.12;ClinGen-CA9870231|ExAC-rs779271027|gnomAD-rs779271027]	4iqr;B100,F100;2.9;X-ray diffraction
rs186765281	A	G	0.0979(BENIGN)	-5.674	N/A	GGT1	Auc/Guc	+	17.16	[ENSP00000383232.1(ENST00000400382.6), ENSP00000383231.1(ENST00000400380.5)]	N/A	P19440	E7ETR7;93;Ile/Val;missense;[ENSP00000395271.1(ENST00000419133.5)]|E7ETN1;93;Ile/Val;missense;[ENSP00000415024.1(ENST00000455483.5)]|E7ENJ5;93;Ile/Val;missense;[ENSP00000389935.1(ENST00000411974.5)]|E7ETU4;93;Ile/Val;missense;[ENSP00000398589.1(ENST00000432867.5)]|E7ET76;93;Ile/Val;missense;[ENSP00000393537.1(ENST00000412658.5)]|E7ETJ6;93;Ile/Val;missense;[ENSP00000415553.1(ENST00000452551.5)]|E7E…	Glutathione hydrolase 1 proenzyme	93	Ile/Val	missense	N/A	CHAIN-Glutathione hydrolase 1 heavy chain;Range:1-380|TOPO_DOM-Extracellular;Range:27-569(UniProtKB:[P07314])|STRAND;Range:87-95(PDB:[4GDX])	Evidence at protein level	569	24/01/2024	07/03/2006	RHEA:23904(PubMed:[17924658,21447318,23682772,7673200,7759490,8095045,8827453])|RHEA:28807(PubMed:[17924658,21447318])|RHEA:59468(PubMed:[17924658,21447318,27791009])|RHEA:31563(PubMed:[21447318])|RHEA:53512(PubMed:[27791009])	Heterodimer composed of the light and heavy chains	Cell membrane(Single-pass type II membrane protein)	Belongs to the gamma-glutamyltransferase family	Q92993(KAT5);Q8TAP4-4(LMO3);P17252(PRKCA);Q15047-2(SETDB1);P61981(YWHAG)	pocket_id:7;rad_gyration:5.507587;energy_per_vol:0.412876;buriedness:0.836735;resid:93 94 95 98 99 100 101 102 147 148 261 262 263 264 265 266 275;mean_plddt:97.9135294117647;score:879.7706090012508	N/A	foldxDdg:1.28229;plddt:98.89	0.805	NC_000022.11:g.24614888A>G	22q11.23	ClinGen-CA10154279|1000Genomes-rs186765281;MAF:0.004393|ESP-rs186765281|ExAC-rs186765281|TOPMed-rs186765281|gnomAD-rs186765281	N/A	[Ile>Met;NC_000022.11:g.24614890C>G;22q11.23;ClinGen-CA410971119|TOPMed-rs1253960818|gnomAD-rs1253960818][Ile>Thr;NC_000022.11:g.24614889T>C;22q11.23;ClinGen-CA410971113|gnomAD-rs1232281995]	4zc6;A66;2.1;X-ray diffraction|7ld9;A66;1.42;X-ray diffraction|4zcg;A66;2.22;X-ray diffraction|7la5;A66;2.07;X-ray diffraction|4z9o;A66;2.3;X-ray diffraction|4zbk;A66;2.18;X-ray diffraction|5v4q;A66;2.2;X-ray diffraction|4gg2;A66;2.21;X-ray diffraction|7lbc;A66;2.28;X-ray diffraction|6xpb;A66;1.74;X-ray diffraction|4gdx;A93;1.67;X-ray diffraction|6xpc;A66;2.26;X-ray diffraction
rs71318991	G	A	0.1435(BENIGN)	-9.025	N/A	GGT1	Gag/Aag	+	19.87	[ENSP00000383232.1(ENST00000400382.6), ENSP00000383231.1(ENST00000400380.5)]	N/A	P19440	B5MC36;28;Glu/Lys;missense;[ENSP00000385001.1(ENST00000404920.1)]|B5MC34;28;Glu/Lys;missense;[ENSP00000385016.1(ENST00000404223.5)]|P19440-1;372;Glu/Lys;missense;[ENSP00000383232.1(ENST00000400382.6), ENSP00000383231.1(ENST00000400380.5)]|P19440-3;28;Glu/Lys;missense;[ENSP00000385445.1(ENST00000404532.5), ENSP00000384381.1(ENST00000401885.5), ENSP00000384820.1(ENST00000403838.5)]|E7ET76;372;Glu/L…	Glutathione hydrolase 1 proenzyme	372	Glu/Lys	missense	CONFLICT-in Ref. 7; AAA02886()	CHAIN-Glutathione hydrolase 1 heavy chain;Range:1-380|TOPO_DOM-Extracellular;Range:27-569(UniProtKB:[P07314])	Evidence at protein level	569	24/01/2024	07/03/2006	RHEA:23904(PubMed:[17924658,21447318,23682772,7673200,7759490,8095045,8827453])|RHEA:28807(PubMed:[17924658,21447318])|RHEA:59468(PubMed:[17924658,21447318,27791009])|RHEA:31563(PubMed:[21447318])|RHEA:53512(PubMed:[27791009])	Heterodimer composed of the light and heavy chains	Cell membrane(Single-pass type II membrane protein)	Belongs to the gamma-glutamyltransferase family	Q92993(KAT5);Q8TAP4-4(LMO3);P17252(PRKCA);Q15047-2(SETDB1);P61981(YWHAG)	pocket_id:25;rad_gyration:3.228842;energy_per_vol:0.355183;buriedness:0.778169;resid:328 329 330 331 336 337 338 339 340 341 372 373 438 439 440;mean_plddt:93.51400000000002;score:503.0050299986036|pocket_id:21;rad_gyration:4.783595;energy_per_vol:0.305543;buriedness:0.726872;resid:365 366 367 368 369 370 371 372 373 433 434 435 436 509 511;mean_plddt:83.44;score:298.8572852820032	P19440-P36969;A residues:115 116 117 120 288 322 323 324 325 326 327 328 329 330 337 338 339 340 341 342 343 344 345 350 353 354 357 364 365 366 367 368 369 370 371 372 373 374 425 426 427 428 429 430 431 432 433 434 435 436 437 438 439 440 441 442 508 509 510 511;B residues:68 70 72 73 74 75 76 77 78 79 103 104 105 106 107 108 109 136 154 155 156 157 158 159 160 161 162 163 164 165 166 167 178 1…	foldxDdg:-0.0575508;plddt:79.35	0.468	NC_000022.11:g.24627525G>A	22q11.23	ClinGen-CA10154573|1000Genomes-rs71318991;MAF:0.00599|ESP-rs71318991|ExAC-rs71318991|TOPMed-rs71318991|gnomAD-rs71318991	N/A	N/A	4zc6;A345;2.1;X-ray diffraction|7ld9;A345;1.42;X-ray diffraction|4zcg;A345;2.22;X-ray diffraction|7la5;A345;2.07;X-ray diffraction|4z9o;A345;2.3;X-ray diffraction|4zbk;A345;2.18;X-ray diffraction|5v4q;A345;2.2;X-ray diffraction|4gg2;A345;2.21;X-ray diffraction|7lbc;A345;2.28;X-ray diffraction|6xpb;A345;1.74;X-ray diffraction|4gdx;A372;1.67;X-ray diffraction|6xpc;A345;2.26;X-ray diffraction

## Sheet: Table S2
rsID	Ref	Alt	AlphaMissense_pathogenicity(class)	ESM1b_score	Notes	Gene	Codon_change	Strand	CADD_phred_like_score	Canonical_isoform_transcripts	MANE_transcript	Uniprot_canonical_isoform_(non_canonical)	Alternative_isoform_mappings	Protein_name	Amino_acid_position	Amino_acid_change	Consequences	Residue_function_(evidence)	Region_function_(evidence)	Protein_existence_evidence	Protein_length	Entry_last_updated	Sequence_last_updated	Protein_catalytic_activity	Protein_complex	Protein_sub_cellular_location	Protein_family	Protein_interactions_PROTEIN(gene)	Predicted_pockets(energy;per_vol;score;resids)	Predicted_interactions(chainA-chainB;a_resids;b_resids;pDockQ)	Foldx_prediction(foldxDdg;plddt)	Conservation_score	Genomic_location	Cytogenetic_band	Other_identifiers_for_the_variant	Diseases_associated_with_variant	Variants_colocated_at_residue_position	Position_in_structures
rs11591147	G	T	0.0844(BENIGN)	-2.188	N/A	PCSK9	cGu/cUu	+	10.44	[ENSP00000303208.5(ENST00000302118.5)]	N/A	Q8NBP7	Q8NBP7-1;46;Arg/Leu;missense;[ENSP00000303208.5(ENST00000302118.5)]|A0A669KAY4;46;Arg/Leu;missense;[ENSP00000501004.1(ENST00000673726.1)]	Proprotein convertase subtilisin/kexin type 9	46	Arg/Leu	missense	N/A	PROPEP-;Range:31-152(PubMed:[12552133])	Evidence at protein level	692	2024-01-24	2011-01-11	N/A	Monomer	Cytoplasm;Secreted;Endosome;Lysosome;Cell surface;Endoplasmic reticulum;Golgi apparatus	Belongs to the peptidase S8 family	P07355(ANXA2);P01130(LDLR);P08253(MMP2);P01130(LDLR)	N/A	N/A	N/A	0.38	NC_000001.11:g.55039974G>T	1p32.3	ClinGen-CA023110|UniProt-VAR_017197|1000Genomes-rs11591147;MAF:0.00639|ESP-rs11591147|ExAC-rs11591147|TOPMed-rs11591147|dbSNP-rs11591147|gnomAD-rs11591147	N/A	[Arg>Cys;NC_000001.11:g.55039973C>T;1p32.3;ClinGen-CA036614|ClinVar-RCV000775256;MAF:7.0E-5;Variant of uncertain significance|ExAC-rs747713772|dbSNP-rs747713772|gnomAD-rs747713772][Arg>His;NC_000001.11:g.55039974G>A;1p32.3;ClinGen-CA22792102|1000Genomes-rs11591147;MAF:0.00639|ESP-rs11591147|ExAC-rs11591147|TOPMed-rs11591147|gnomAD-rs11591147]	6mv5;C16;2.1;X-ray diffraction|6e4y;C15;2.24;X-ray diffraction|6e4z;C15;2.2;X-ray diffraction
rs149344982	G	A	0.0969(BENIGN)	-4.786	N/A	ALPL	cGc/cAc	+	15.93	[ENSP00000363965.1(ENST00000374832.5), ENSP00000363973.3(ENST00000374840.8)]	N/A	P05186	P05186-3;97;Arg/His;missense;[ENSP00000442672.1(ENST00000540617.5)]|P05186-1;152;Arg/His;missense;[ENSP00000363965.1(ENST00000374832.5), ENSP00000363973.3(ENST00000374840.8)]|P05186-2;75;Arg/His;missense;[ENSP00000437674.1(ENST00000539907.5)]	Alkaline phosphatase, tissue-nonspecific isozyme	152	Arg/His	missense	N/A	CHAIN-Alkaline phosphatase, tissue-nonspecific isozyme;Range:18-501|DISULFID-;Range:139-201(UniProtKB:[P05187])	Evidence at protein level	524	2024-01-24	2005-06-21	RHEA:15017(PROSITE-ProRule:[PRU10042]PubMed:[12162492,2220817,23039266,23688511,25775211,25982064,33821301])|RHEA:24576(PubMed:[12162492])|RHEA:20533(PubMed:[12162492,2220817])|RHEA:16089(PubMed:[2220817])|RHEA:12977(UniProtKB:[P09242])|RHEA:13065(UniProtKB:[P09242])|RHEA:61436(UniProtKB:[P09242])|RHEA:29375(UniProtKB:[P09242])	Homodimer	Cell membrane;Extracellular vesicle membrane;Mitochondrion membrane;Mitochondrion intermembrane space(Lipid-anchor, GPI-anchor;Lipid-anchor, GPI-anchor;Lipid-anchor, GPI-anchor)	Belongs to the alkaline phosphatase family	N/A	pocket_id:4;rad_gyration:7.429936;energy_per_vol:0.384633;buriedness:0.783479;resid:152 155 156 157 158 159 160 161 210 211 212 213 214 216 217 261 263 264 281 283 284 285 319 320 321 322 323 324 325;mean_plddt:97.5906896551724;score:915.8938490075441|pocket_id:23;rad_gyration:3.699892;energy_per_vol:0.337732;buriedness:0.754545;resid:148 152 153 154 156 157 489 490 491 492 494;mean_plddt:96.1145…	N/A	foldxDdg:1.07521;plddt:98.35	0.543	NC_000001.11:g.21563267G>A	1p36.12	ClinGen-CA203017|ClinVar-RCV000178779;Benign|ClinVar-RCV000207050;Benign|ClinVar-RCV000224237;Benign|ClinVar-RCV001533725;Benign|ClinVar-RCV001533726;Benign|ClinVar-RCV001533727;Benign|ClinVar-RCV002277412;Benign|ClinVar-RCV002492784;Benign|UniProt-VAR_013980;Benign|1000Genomes-rs149344982;MAF:0.01038|ESP-rs149344982|ExAC-rs149344982|TOPMed-rs149344982|dbSNP-rs149344982|gnomAD-rs149344982	Adult hypophosphatasia-(pubmed:[20301329]ClinVar:[RCV001533727,RCV002492784])|Childhood hypophosphatasia-(pubmed:[20301329]ClinVar:[RCV001533726,RCV002492784])|Hypophosphatasia-(pubmed:[20301329]ClinVar:[RCV000207050])|Infantile hypophosphatasia-(pubmed:[20301329]ClinVar:[RCV001533725,RCV002492784])|Osteogenesis imperfecta (OI)-(pubmed:[20301472]ClinVar:[RCV002277412])|Hypophosphatasia (HOPS)-(pu…	[Arg>Cys;NC_000001.11:g.21563266C>T;1p36.12;ClinGen-CA19059381|NCI-TCGA Cosmic-COSM1338929|cosmic curated-COSM1338929|NCI-TCGA-rs200621180;MAF:8.023E-6|TOPMed-rs200621180|gnomAD-rs200621180|UniProt-VAR_085156]	N/A
rs2302154	T	C	0.0745(BENIGN)	-2.805	N/A	HJURP	Acg/Gcg	-	0.01	[ENSP00000414109.1(ENST00000411486.7)]	N/A	Q8NCD3	Q8NCD3-3;4;Thr/Ala;missense;[ENSP00000401944.1(ENST00000441687.5)]|Q8NCD3-2;4;Thr/Ala;missense;[ENSP00000407208.1(ENST00000432087.5)]|F8WCV1;4;Thr/Ala;missense;[ENSP00000403668.1(ENST00000453122.1)]|Q8NCD3-1;4;Thr/Ala;missense;[ENSP00000414109.1(ENST00000411486.7)]|C9JWC4;4;Thr/Ala;missense;[ENSP00000393253.1(ENST00000414924.5)]	Holliday junction recognition protein	4	Thr/Ala	missense	N/A	CHAIN-Holliday junction recognition protein;Range:1-748	Evidence at protein level	748	2024-03-27	2009-06-16	N/A	Interacts with CENPA (via CATD domain); the interaction is direct and specific for CENPA since it does not interact with H3	Nucleus, nucleolus;Chromosome, centromere	N/A	P49450(CENPA);P49450-1(CENPA);Q8NCD3(HJURP);P49450(CENPA)	N/A	N/A	foldxDdg:-0.260179;plddt:54.11	0.478	NC_000002.12:g.233854491T>C	2q37.1	ClinGen-CA2181494|UniProt-VAR_056912|1000Genomes-rs2302154;MAF:0.04872|ESP-rs2302154|ExAC-rs2302154|TOPMed-rs2302154|dbSNP-rs2302154|gnomAD-rs2302154	N/A	[Thr>Met;NC_000002.12:g.233854490G>A;2q37.1;ClinGen-CA2181493|1000Genomes-rs374800251;MAF:2.0E-4|ExAC-rs374800251|TOPMed-rs374800251|gnomAD-rs374800251][Thr>Arg;NC_000002.12:g.233854490G>C;2q37.1;ClinGen-CA351108332|1000Genomes-rs374800251;MAF:2.0E-4|ExAC-rs374800251|TOPMed-rs374800251|gnomAD-rs374800251]	N/A
rs28381983	T	C	N/A	N/A	N/A	SPATA31H1	Ucc/Ccc	+	0.16	[ENSP00000403181.2(ENST00000447166.3)]	N/A	C9JG08	C9JG08;5069;Ser/Pro;missense;[ENSP00000403181.2(ENST00000447166.3)]	Chromosome 2 open reading frame 16	5069	Ser/Pro	missense	N/A	N/A	N/A	N/A	N/A	N/A	N/A	N/A	N/A	N/A	N/A	N/A	N/A	N/A	N/A	N/A	N/A	N/A	N/A	N/A	N/A
rs34345884	G	C	0.1204(BENIGN)	-1.556	N/A	GMPPB	Cac/Gac	-	22.6	[ENSP00000311130.6(ENST00000308388.7), ENSP00000418565.1(ENST00000480687.5)]	N/A	Q9Y5P6	A0A7I2V691;126;His/Asp;missense;[ENSP00000504692.1(ENST00000678853.1)]|A0A7I2V2Y5;126;His/Asp;missense;[ENSP00000503176.1(ENST00000678010.1)]|A0A7I2V4B5;126;His/Asp;missense;[ENSP00000503880.1(ENST00000677393.1)]|A0A7I2YQI5;126;His/Asp;missense;[ENSP00000503768.1(ENST00000495627.2)]|Q9Y5P6-2;126;His/Asp;missense;[ENSP00000309092.6(ENST00000308375.10)]|Q9Y5P6-1;126;His/Asp;missense;[ENSP0000031113…	Mannose-1-phosphate guanyltransferase beta	126	His/Asp	missense	N/A	CHAIN-Mannose-1-phosphate guanyltransferase beta;Range:1-360|HELIX;Range:117-127(PDB:[7D73])	Evidence at protein level	360	2024-01-24	2007-10-23	RHEA:15229(UniProtKB:[P0C5I2])	Associates with GMPPA	Cytoplasm	Belongs to the transferase hexapeptide repeat family	Q7L190(DPPA4);Q8IVS8(GLYCTK);Q96IJ6(GMPPA);O15160(POLR1C);Q86UY0(TXNDC5)	pocket_id:21;rad_gyration:3.700545;energy_per_vol:0.362992;buriedness:0.791925;resid:123 126 127 129 151 152 153 154 208 209;mean_plddt:95.357;score:365.9109309026891	N/A	foldxDdg:0.282383;plddt:97.61	0.447	NC_000003.12:g.49722998G>C	3p21.31	ClinGen-CA2405592|ClinVar-RCV000242290;MAF:0.00879;Benign|ClinVar-RCV000539042;MAF:0.00879;Benign|ClinVar-RCV001795457;MAF:0.00879;Benign|UniProt-VAR_035372|1000Genomes-rs34345884;MAF:0.008786|ESP-rs34345884|ExAC-rs34345884|TOPMed-rs34345884|dbSNP-rs34345884|gnomAD-rs34345884	Autosomal recessive limb-girdle muscular dystrophy type 2T-(ClinVar:[RCV000539042])|Muscular dystrophy-dystroglycanopathy (congenital with brain and eye anomalies), type A14-(ClinVar:[RCV000539042])|Muscular dystrophy-dystroglycanopathy (congenital with intellectual disability), type B14 (MDDGB14)-(ClinVar:[RCV000539042])	[His>Arg;NC_000003.12:g.49722997T>C;3p21.31;ClinGen-CA352829502|gnomAD-rs1383720066][His>Tyr;NC_000003.12:g.49722998G>A;3p21.31;ClinGen-CA352829505|1000Genomes-rs34345884;MAF:0.008786|ESP-rs34345884|ExAC-rs34345884|TOPMed-rs34345884|gnomAD-rs34345884]	7d74;K126,L126,J126,G126,H126,I126,F126,E126;3.1;Electron Microscopy|7d72;I126,H126,L126,J126,B126,A126,K126,G126;3.4;Electron Microscopy|7d73;C126,L126,F126,H126,I126,G126,K126,J126;3.0;Electron Microscopy
rs34801630	C	T	0.1375(BENIGN)	-6.9	N/A	FYCO1	Gag/Aag	-	26.5	[ENSP00000296137.2(ENST00000296137.7)]	N/A	Q9BQS8	Q9BQS8-1;994;Glu/Lys;missense;[ENSP00000296137.2(ENST00000296137.7)]	FYVE and coiled-coil domain-containing protein 1	994	Glu/Lys	missense	N/A	CHAIN-FYVE and coiled-coil domain-containing protein 1;Range:2-1478|COILED;Range:596-1151()	Evidence at protein level	1478	2024-01-24	2011-02-08	N/A	Can form homodimers	Cytoplasmic vesicle, autophagosome;Endosome;Lysosome	N/A	O95166(GABARAP);Q9H0R8(GABARAPL1);P60520(GABARAPL2);O60341(KDM1A);P33176(KIF5B);Q9H0B6(KLC2);Q9GZQ8(MAP1LC3B);Q9BXW4(MAP1LC3C);Q96LA8(PRMT6);P0DTD1(rep);O75190-2(DNAJB6);O14901(KLF11);Q9BVL2(NUP58)	N/A	N/A	N/A	0.836	NC_000003.12:g.45966354C>T	3p21.31	ClinGen-CA2352926|ClinVar-RCV000253867;Benign|ClinVar-RCV000528598;Benign|ClinVar-RCV001651251;Benign|UniProt-VAR_056883|1000Genomes-rs34801630;MAF:0.05471|ESP-rs34801630|ExAC-rs34801630|TOPMed-rs34801630|dbSNP-rs34801630|gnomAD-rs34801630	Cataract 18 (CATC2)-(ClinVar:[RCV000528598])	[Glu>Ala;NC_000003.12:g.45966353T>G;3p21.31;ClinGen-CA352454763|gnomAD-rs1452238371]	N/A
rs9362415	A	G	0.0542(BENIGN)	-2.711	N/A	ZNF292	Aua/Gua	+	4.62	[ENSP00000358590.3(ENST00000369577.8)]	N/A	O60281	A0A8V8TPI9;1740;Ile/Val;missense;[ENSP00000514683.1(ENST00000699914.1)]|O60281-1;1740;Ile/Val;missense;[ENSP00000358590.3(ENST00000369577.8)]|J3KNV1;1735;Ile/Val;missense;[ENSP00000342847.4(ENST00000339907.8)]	Zinc finger protein 292	1740	Ile/Val	missense	N/A	CHAIN-Zinc finger protein 292;Range:1-2723	Evidence at protein level	2723	2024-03-27	2010-03-23	N/A	N/A	Nucleus	Belongs to the krueppel C2H2-type zinc-finger protein family	N/A	N/A	N/A	N/A	0.62	NC_000006.12:g.87258847A>G	6q14.3	ClinGen-CA3914449|UniProt-VAR_062972|1000Genomes-rs9362415;MAF:0.4071|ESP-rs9362415|ExAC-rs9362415|TOPMed-rs9362415|dbSNP-rs9362415|gnomAD-rs9362415	N/A	[Ile>Leu;NC_000006.12:g.87258847A>T;6q14.3;ClinGen-CA364931640|1000Genomes-rs9362415;MAF:0.4071|ESP-rs9362415|ExAC-rs9362415|TOPMed-rs9362415|gnomAD-rs9362415]	N/A
rs34755188	C	T	0.2452(BENIGN)	-5.484	N/A	GRIN3A	cGc/cAc	-	23.8	[ENSP00000355155.3(ENST00000361820.6)]	N/A	Q8TCU5	N/A	Glutamate receptor ionotropic, NMDA 3A	480	Arg/His	missense	N/A	CHAIN-Glutamate receptor ionotropic, NMDA 3A;Range:24-1115|TOPO_DOM-Extracellular;Range:24-674()	Evidence at protein level	1115	2024-01-24	2008-11-04	N/A	Forms heteromeric channel of a zeta subunit (GRIN1), a epsilon subunit (GRIN2A, GRIN2B, GRIN2C or GRIN2D) and a third subunit (GRIN3A or GRIN3B)	Cell membrane;Postsynaptic cell membrane;Postsynaptic density(Multi-pass membrane protein)	Belongs to the glutamate-gated ion channel (TC 1	N/A	pocket_id:32;rad_gyration:3.418279;energy_per_vol:0.39289;buriedness:0.83237;resid:469 470 479 480 481 491 493 494 495 496 497 500 501 503 504;mean_plddt:60.51400000000002;score:165.94273447932247	N/A	foldxDdg:1.96837;plddt:85.63	0.515	NC_000009.12:g.101670973C>T	9q31.1	ClinGen-CA5163311|UniProt-VAR_047150|1000Genomes-rs34755188;MAF:0.008586|ESP-rs34755188|ExAC-rs34755188|TOPMed-rs34755188|dbSNP-rs34755188|gnomAD-rs34755188	N/A	[Arg>Cys;NC_000009.12:g.101670974G>A;9q31.1;ClinGen-CA5163313|1000Genomes-rs149729514;MAF:0.004393|ESP-rs149729514|ExAC-rs149729514|TOPMed-rs149729514|gnomAD-rs149729514][Arg>Gly;NC_000009.12:g.101670974G>C;9q31.1;ClinGen-CA5163312|1000Genomes-rs149729514;MAF:0.004393|ESP-rs149729514|ExAC-rs149729514|TOPMed-rs149729514|gnomAD-rs149729514]	N/A
rs61751475	C	T	0.0693(BENIGN)	-3.26	N/A	SURF2	Cca/Uca	+	0.01	[ENSP00000361032.4(ENST00000371964.5)]	N/A	Q15527	N/A	Surfeit locus protein 2	255	Pro/Ser	missense	N/A	CHAIN-Surfeit locus protein 2;Range:1-256|REGION-Disordered;Range:133-256(SAM:[MobiDB-lite])	Evidence at protein level	256	2024-01-24	2022-02-23	N/A	N/A	N/A	Belongs to the SURF2 family	N/A	N/A	N/A	foldxDdg:0.388884;plddt:62.5	0.533	NC_000009.12:g.133361131C>T	9q34.2	ClinGen-CA200837611|1000Genomes-rs61751475;MAF:0.01578|ESP-rs61751475|ExAC-rs61751475|TOPMed-rs61751475|gnomAD-rs61751475	N/A	[Pro>Leu;NC_000009.12:g.133361132C>T;9q34.2;ClinGen-CA200837615|ESP-rs141740976|ExAC-rs141740976|TOPMed-rs141740976|gnomAD-rs141740976]	N/A
rs16965150	C	T	0.0838(BENIGN)	-4.531	N/A	NLRC5	uCg/uUg	+	0.3	[ENSP00000262510.6(ENST00000262510.10), ENSP00000509992.1(ENST00000688547.1)]	N/A	Q86WI3	Q86WI3-4;210;Ser/Leu;missense;[ENSP00000441727.1(ENST00000539144.5)]|Q86WI3-3;210;Ser/Leu;missense;[ENSP00000441679.1(ENST00000539881.5)]|Q86WI3-1;210;Ser/Leu;missense;[ENSP00000262510.6(ENST00000262510.10), ENSP00000509992.1(ENST00000688547.1)]	Protein NLRC5	210	Ser/Leu	missense	N/A	CHAIN-Protein NLRC5;Range:1-1866	Evidence at protein level	1866	2024-03-27	2009-11-24	N/A	Interacts with CHUK and IKBKB; prevents CHUK and IKBKB phosphorylation and inhibits their kinase activity	Cytoplasm	Belongs to the NLRP family	N/A	pocket_id:15;rad_gyration:5.567639;energy_per_vol:0.357689;buriedness:0.797619;resid:182 183 184 185 199 200 201 202 203 204 205 206 207 208 210 211 214 215 216 217 221;mean_plddt:51.60380952380952;score:308.10575807596786	N/A	foldxDdg:-0.154251;plddt:67.09	0.411	NC_000016.10:g.57025572C>T	16q13	ClinGen-CA8071651|UniProt-VAR_034607|1000Genomes-rs16965150;MAF:0.01098|ESP-rs16965150|ExAC-rs16965150|TOPMed-rs16965150|dbSNP-rs16965150|gnomAD-rs16965150	N/A	N/A	N/A
rs41278174	G	A	0.1518(BENIGN)	-7.194	N/A	ABCC6	Cgg/Ugg	-	25.8	[ENSP00000205557.7(ENST00000205557.12)]	N/A	O95255	O95255-1;1064;Arg/Trp;missense;[ENSP00000205557.7(ENST00000205557.12)]|A0A8C8Q0G8;1064;Arg/Trp;missense;[ENSP00000483331.2(ENST00000622290.5)]	ATP-binding cassette sub-family C member 6	1064	Arg/Trp	missense	N/A	CHAIN-ATP-binding cassette sub-family C member 6;Range:1-1503|TRANSMEM-Helical; Name=14;Range:1062-1082(PROSITE-ProRule:[PRU00441])|DOMAIN-ABC transmembrane type-1 2;Range:947-1228(PROSITE-ProRule:[PRU00441])	Evidence at protein level	1503	2024-03-27	2009-11-24	RHEA:19121(PubMed:[11880368,12414644])|RHEA:38963(PubMed:[11880368,12414644])	N/A	Basal cell membrane(Multi-pass membrane protein)|Basolateral cell membrane(Multi-pass membrane protein)|Endoplasmic reticulum membrane(Single-pass membrane protein)	Belongs to the ABC transporter superfamily	N/A	pocket_id:18;rad_gyration:4.276268;energy_per_vol:0.428083;buriedness:0.882243;resid:473 474 477 480 481 484 525 526 528 529 532 533 586 589 1006 1009 1010 1053 1056 1057 1058 1060 1061 1064;mean_plddt:87.63625;score:932.0631552700745|pocket_id:64;rad_gyration:3.43356;energy_per_vol:0.351021;buriedness:0.780186;resid:532 536 586 1061 1062 1064 1065 1068 1069 1218 1221 1222 1225;mean_plddt:86.0515…	N/A	foldxDdg:-0.530418;plddt:91.89	0.686	NC_000016.10:g.16165739G>A	16p13.11	ClinGen-CA7925664|ClinVar-RCV000499197;Benign|ClinVar-RCV001523288;Benign|ClinVar-RCV001529995;Benign|ClinVar-RCV002253480;Benign|ClinVar-RCV002253481;Benign|ClinVar-RCV002489226;Benign|UniProt-VAR_067889|1000Genomes-rs41278174;MAF:0.01158|ESP-rs41278174|ExAC-rs41278174|TOPMed-rs41278174|dbSNP-rs41278174|gnomAD-rs41278174	Arterial calcification, generalized, of infancy, 2-(pubmed:[25392903]ClinVar:[RCV002253481,RCV002489226])|Pseudoxanthoma elasticum (PXE)-(pubmed:[20301292]ClinVar:[RCV000499197,RCV002489226])|Pseudoxanthoma elasticum, forme fruste-(pubmed:[20301292]ClinVar:[RCV002253480,RCV002489226])	[Arg>Pro;NC_000016.10:g.16165738C>G;16p13.11;ClinGen-CA7925663|ExAC-rs774796759|TOPMed-rs774796759|gnomAD-rs774796759][Arg>Gln;NC_000016.10:g.16165738C>T;16p13.11;ClinGen-CA278633018|ExAC-rs774796759|TOPMed-rs774796759|gnomAD-rs774796759]	N/A
rs5880	G	C	0.4199(AMBIGUOUS)	-3.591	N/A	CETP	Gcc/Ccc	+	24.8	[ENSP00000200676.3(ENST00000200676.8)]	N/A	P11597	H3BRJ9;325;Ala/Pro;missense;[ENSP00000456276.1(ENST00000566128.1)]|P11597-1;390;Ala/Pro;missense;[ENSP00000200676.3(ENST00000200676.8)]|A0A0S2Z3F6;390;Ala/Pro;missense;[ENSP00000200676.3(ENST00000200676.8)]|P11597-2;330;Ala/Pro;missense;[ENSP00000369106.2(ENST00000379780.6)]|A0A0S2Z3I8;330;Ala/Pro;missense;[ENSP00000369106.2(ENST00000379780.6)]	Cholesteryl ester transfer protein	390	Ala/Pro	missense	N/A	CHAIN-Cholesteryl ester transfer protein;Range:18-493|STRAND;Range:378-393(PDB:[2OBD])	Evidence at protein level	493	2024-01-24	2005-07-19	RHEA:43348(PubMed:[24293641])|RHEA:43352(PubMed:[24293641,3281933])|RHEA:43356(PubMed:[3281933])	N/A	Secreted	Belongs to the BPI/LBP/Plunc superfamily	N/A	pocket_id:1;rad_gyration:15.781318;energy_per_vol:0.441595;buriedness:0.933432;resid:28 29 30 31 32 36 37 38 39 40 41 43 44 47 48 51 90 91 99 101 103 142 143 144 146 153 155 157 203 204 205 207 208 209 211 212 213 214 215 216 218 219 220 221 222 223 224 225 228 229 232 234 238 239 245 246 247 249 253 278 280 282 286 287 290 291 294 299 300 301 302 303 304 309 312 313 338 340 341 342 346 348 355 3…	N/A	foldxDdg:-0.69146;plddt:98.24	0.633	NC_000016.10:g.56981179G>C	16q13	ClinGen-CA8071258|ClinVar-RCV000291120;Benign|ClinVar-RCV001597085;Benign|UniProt-VAR_013920|1000Genomes-rs5880;MAF:0.04193|ESP-rs5880|ExAC-rs5880|TOPMed-rs5880|dbSNP-rs5880|gnomAD-rs5880	Hyperalphalipoproteinemia 1 (HALP1)-(ClinVar:[RCV000291120])	[Ala>Asp;NC_000016.10:g.56981180C>A;16q13;ClinGen-CA396006567|gnomAD-rs1355392609][Ala>Thr;NC_000016.10:g.56981179G>A;16q13;ClinGen-CA396006566|1000Genomes-rs5880;MAF:0.04193|ESP-rs5880|ExAC-rs5880|TOPMed-rs5880|gnomAD-rs5880][Ala>Val;NC_000016.10:g.56981180C>T;16q13;ClinGen-CA396006569|gnomAD-rs1355392609]	4ews;A373;2.59;X-ray diffraction|2obd;A373;2.1;X-ray diffraction|4f2a;A373;3.11;X-ray diffraction
rs11078698	C	T	N/A	N/A	N/A	EIF4A1	caC/caU	+	7.46	[ENSP00000293831.8(ENST00000293831.13)]	N/A	P60842	J3QQP0;86;Arg/Cys;missense;[ENSP00000463821.1(ENST00000581544.5)]|J3QR64;116;His/His;synonymous;[ENSP00000464066.2(ENST00000581384.5)]|P60842-1;132;His/His;synonymous;[ENSP00000293831.8(ENST00000293831.13)]|P60842-2;132;His/His;synonymous;[ENSP00000463486.1(ENST00000577269.5)]|J3QS69;130;His/His;synonymous;[ENSP00000464550.1(ENST00000578495.5)]|J3QLN6;96;His/His;synonymous;[ENSP00000463634.1(ENST…	Eukaryotic initiation factor 4A-I	132	His/His	synonymous	N/A	CHAIN-Eukaryotic initiation factor 4A-I;Range:2-406|DOMAIN-Helicase ATP-binding;Range:63-234(PROSITE-ProRule:[PRU00541])|STRAND;Range:131-134(PDB:[5ZBZ])	Evidence at protein level	406	2024-03-27	2004-04-13	RHEA:13065	eIF4F is a multi-subunit complex, the composition of which varies with external and internal environmental conditions|(Microbial infection) Interacts with human cytomegalovirus/HHV-5 protein UL69	N/A	Belongs to the DEAD box helicase family	Q04637(EIF4G1);Q04637-1(EIF4G1);P78344(EIF4G2);P78344-1(EIF4G2);Q15056(EIF4H);Q53EL6(PDCD4);Q9BWF3-1(RBM4)	pocket_id:15;rad_gyration:4.199816;energy_per_vol:0.391564;buriedness:0.830549;resid:117 121 129 130 131 132 143 145 146 147 149 150 151 152;mean_plddt:92.47571428571428;score:678.3683953326446|pocket_id:20;rad_gyration:3.698131;energy_per_vol:0.329955;buriedness:0.774011;resid:114 117 132 133 134 135 138 139 140 142 143 146 161 312;mean_plddt:91.62785714285714;score:531.4711504689565	P23588-P60842;A residues:135 333 334 335 336 337 338 339 340 341 342 343 364 365 366 367 368 369 370 371 372 373 374 375 376 377 378 379 380 381 382 383 384 385 386 387 388 389 390 391 392 393 395;B residues:32 33 34 42 45 46 47 48 49 50 51 52 53 54 55 56 57 58 59 60 79 80 81 83 84 111 112 113 114 115 116 117 118 119 120 121 122 123 124 125 126 127 128 129 130 131 132 133 134 135 137 138 139 140 …	N/A	0.94	N/A	N/A	N/A	N/A	[His>Tyr;NC_000017.11:g.7576572C>T;17p13.1;NCI-TCGA-TCGA novel]	2zu6;A114,F114,D114,C114;2.8;X-ray diffraction|2g9n;B115,A115;2.25;X-ray diffraction|7pq0;B120;3.0;X-ray diffraction|5zc9;A120;2.0;X-ray diffraction|3eiq;C140,A140;3.5;X-ray diffraction|5zbz;A114;1.31;X-ray diffraction|6zmw;DB132;3.7;Electron Microscopy|7ppz;B120;2.52;X-ray diffraction
rs1136201	A	G	0.1335(BENIGN)	-4.554	N/A	ERBB2	Auc/Guc	+	19.08	[ENSP00000269571.4(ENST00000269571.10)]	N/A	P04626	J3QLU9;655;Ile/Val;missense;[ENSP00000463714.1(ENST00000584450.5)]|J3KTI5;24;Ile/Val;missense;[ENSP00000463002.1(ENST00000580074.1)]|P04626-4;640;Ile/Val;missense;[ENSP00000446466.1(ENST00000541774.5)]|X5DNK3;655;Ile/Val;missense;[ENSP00000269571.4(ENST00000269571.10)]|P04626-5;625;Ile/Val;missense;[ENSP00000385185.2(ENST00000406381.6), ENSP00000462438.1(ENST00000584601.5)]|J3QRJ7;95;Ile/Val;miss…	Receptor tyrosine-protein kinase erbB-2	655	Ile/Val	missense	N/A	CHAIN-Receptor tyrosine-protein kinase erbB-2;Range:23-1255|TRANSMEM-Helical;Range:653-675()|HELIX;Range:651-678(PDB:[2JWA])	Evidence at protein level	1255	2024-01-24	1987-08-13	RHEA:10596(PROSITE-ProRule:[PRU10028]PubMed:[21454582])	Homodimer (PubMed:21454582)	Cell membrane;Cell projection, ruffle membrane(Single-pass type I membrane protein;Single-pass type I membrane protein)|Cell membrane;Early endosome;Cytoplasm, perinuclear region;Nucleus(Single-pass type I membrane protein)|Cytoplasm;Nucleus|Cytoplasm;Nucleus	Belongs to the protein kinase superfamily	P00519(ABL1);P42684(ABL2);P15309(ACP3);P60709(ACTB);Q92625(ANKS1A);O00213(APBB1);O75815(BCAR3);Q9HB71(CACYBP);Q16543(CDC37);Q9NSE2(CISH);Q7Z7G1(CLNK);P46109(CRKL);Q93034(CUL5);Q99704(DOK1);Q8TEW6(DOK4);Q15075(EEA1);P98172(EFNB1);P00533(EGFR);P04626(ERBB2);P21860(ERBB3);Q15303(ERBB4);Q9UJM3(ERRFI1);P09769(FGR);P06241(FYN);O75791(GRAP2);P62993(GRB2);Q14451(GRB7);P07900(HSP90AA1);P08238(HSP90AB1);P1…	N/A	N/A	N/A	0.588	NC_000017.11:g.39723335A>G	17q12	ClinGen-CA123559|ClinVar-RCV000014887;MAF:0.12141;Pathogenic|ClinVar-RCV000120744;MAF:0.12141;Pathogenic|ClinVar-RCV001511302;MAF:0.12141;Pathogenic|ClinVar-RCV002464064;MAF:0.12141;Pathogenic|UniProt-VAR_004078|1000Genomes-rs1136201;MAF:0.1214|ESP-rs1136201|ExAC-rs1136201|TOPMed-rs1136201|dbSNP-rs1136201|gnomAD-rs1136201	ERBB2 POLYMORPHISM-(ClinVar:[RCV000014887])|Lung cancer-(pubmed:[29398453]ClinVar:[RCV002464064])	[Ile>Phe;NC_000017.11:g.39723335A>T;17q12;ClinGen-CA290439001|1000Genomes-rs1136201;MAF:0.1214|ESP-rs1136201|ExAC-rs1136201|TOPMed-rs1136201|gnomAD-rs1136201]	2n2a;A12,B12;0.0;Solution NMR|5ob4;B15,A15;0.0;Solution NMR|1qr1;C2,F2;2.4;X-ray diffraction|2jwa;B15,A15;0.0;Solution NMR|2ks1;A15;0.0;Solution NMR
rs1801689	A	C	0.9698(PATHOGENIC)	-16.85	N/A	APOH	Ugc/Ggc	-	26.3	[ENSP00000205948.6(ENST00000205948.11)]	N/A	P02749	A0A384NKM6;325;Cys/Gly;missense;[ENSP00000205948.6(ENST00000205948.11)]	Beta-2-glycoprotein 1	325	Cys/Gly	missense	N/A	CHAIN-Beta-2-glycoprotein 1;Range:20-345|REGION-Sushi-like;Range:263-345|DISULFID-;Range:300-325|DISULFID-;Range:307-345	Evidence at protein level	345	2024-01-24	1994-06-01	N/A	N/A	Secreted	N/A	P02749(APOH);P13473-2(LAMP2);P01130(LDLR);P08519(LPA);P11226(MBL2);P02776(PF4);P00747(PLG);Q9Y371(SH3GLB1);Q924X6(Lrp8);P02749(APOH);P02776(PF4)	pocket_id:5;rad_gyration:5.59176;energy_per_vol:0.336714;buriedness:0.747159;resid:295 311 312 313 314 315 316 317 319 320 321 322 323 324 325;mean_plddt:96.69266666666664;score:881.5936363233643|pocket_id:4;rad_gyration:5.608054;energy_per_vol:0.400068;buriedness:0.8151;resid:299 300 301 302 303 304 309 324 325 326 327 328 329 336 337 338 339 340;mean_plddt:89.87166666666667;score:867.1887275425…	N/A	foldxDdg:4.56783;plddt:94.14	1.0	NC_000017.11:g.66214462A>C	17q24.2	ClinGen-CA8720221|UniProt-VAR_008170;Benign|1000Genomes-rs1801689;MAF:0.01637|ESP-rs1801689|ExAC-rs1801689|TOPMed-rs1801689|dbSNP-rs1801689|gnomAD-rs1801689	N/A	[Cys>Phe;NC_000017.11:g.66214461C>A;17q24.2;ClinGen-CA8720220|ExAC-rs752860358|NCI-TCGA-rs752860358;MAF:3.988E-6|gnomAD-rs752860358][Cys>Arg;NC_000017.11:g.66214462A>G;17q24.2;ClinGen-CA8720222|1000Genomes-rs1801689;MAF:0.01637|ESP-rs1801689|ExAC-rs1801689|TOPMed-rs1801689|gnomAD-rs1801689]	2kri;A64;0.0;Solution NMR|6xsd;A306;2.54;X-ray diffraction|1c1z;A306;2.87;X-ray diffraction|7jik;A306;2.69;X-ray diffraction|6v08;A306;2.58;X-ray diffraction|6v09;A318;2.99;X-ray diffraction|4jhs;A160;3.0;X-ray diffraction|6xst;A306;2.92;X-ray diffraction|1qub;A306;2.7;X-ray diffraction|7kg4;B306,A306;3.3;X-ray diffraction|3op8;B64,A64;1.9;X-ray diffraction|6v06;A306;2.4;X-ray diffraction|1g4g;A6…
rs62623385	A	T	0.113(BENIGN)	-9.959	N/A	CNTROB	Aac/Uac	+	16.63	[ENSP00000456335.1(ENST00000563694.6)]	N/A	Q8N137	Q8N137-1;539;Asn/Tyr;missense;[ENSP00000456335.1(ENST00000563694.6)]|Q8N137-2;539;Asn/Tyr;missense;[ENSP00000369614.3(ENST00000380262.7)]|Q8N137-3;539;Asn/Tyr;missense;[ENSP00000454840.1(ENST00000565740.5)]	Centrobin	539	Asn/Tyr	missense	N/A	CHAIN-Centrobin;Range:1-903|REGION-Required for centrosome localization;Range:365-903|COILED;Range:196-560()	Evidence at protein level	903	2024-03-27	2002-10-01	N/A	Interacts with LYST	Cytoplasm, cytoskeleton, microtubule organizing center, centrosome, centriole	N/A	P27708(CAD);Q13057-2(COASY);Q2TBE0(CWF19L2);Q68J44(DUSP29);Q14241(ELOA);Q7L775(EPM2AIP1);Q96EZ8(MCRS1);Q96FA3(PELI1);Q96T60(PNKP);P54725(RAD23A);Q9UHP6(RSPH14);Q5T7P8-2(SYT6);Q15560(TCEA2);Q9NRE2(TSHZ2);Q5W5X9(TTC23)	N/A	N/A	foldxDdg:-0.0200282;plddt:86.25	0.498	NC_000017.11:g.7944519A>T	17p13.1	ClinGen-CA8365100|1000Genomes-rs62623385;MAF:0.01218|ESP-rs62623385|ExAC-rs62623385|TOPMed-rs62623385|gnomAD-rs62623385	N/A	N/A	N/A
rs72836561	C	T	0.2993(BENIGN)	-7.633	N/A	CD300LG	Cgu/Ugu	+	19.04	[ENSP00000321005.3(ENST00000317310.5)]	N/A	Q6UXG3	Q6UXG3-5;82;Arg/Cys;missense;[ENSP00000366408.3(ENST00000377203.8)]|K7EL06;82;Arg/Cys;missense;[ENSP00000465863.1(ENST00000588884.1)]|Q6UXG3-1;82;Arg/Cys;missense;[ENSP00000321005.3(ENST00000317310.5)]|Q6UXG3-2;82;Arg/Cys;missense;[ENSP00000293396.7(ENST00000293396.12)]|A0A8V8TQK5;82;Arg/Cys;missense;[ENSP00000515157.1(ENST00000700726.1)]|Q6UXG3-3;82;Arg/Cys;missense;[ENSP00000468800.1(ENST000005…	CMRF35-like molecule 9	82	Arg/Cys	missense	N/A	CHAIN-CMRF35-like molecule 9;Range:19-332|TOPO_DOM-Extracellular;Range:19-247()|DOMAIN-Ig-like V-type;Range:19-121|DISULFID-;Range:37-107(PROSITE-ProRule:[PRU00114])	Evidence at protein level	332	2024-01-24	2010-05-18	N/A	N/A	Apical cell membrane;Basolateral cell membrane;Endosome, multivesicular body membrane(Single-pass type I membrane protein;Single-pass type I membrane protein;Single-pass type I membrane protein)	Belongs to the CD300 family	A8MQ03(CYSRT1);Q07627(KRTAP1-1);P60411(KRTAP10-9);Q6L8G8(KRTAP5-7);P21145(MAL);P55061(TMBIM6)	N/A	N/A	foldxDdg:1.98629;plddt:97.06	0.627	NC_000017.11:g.43848758C>T	17q21.31	ClinGen-CA8593929|1000Genomes-rs72836561;MAF:0.01418|ESP-rs72836561|ExAC-rs72836561|TOPMed-rs72836561|gnomAD-rs72836561	N/A	[Arg>His;NC_000017.11:g.43848759G>A;17q21.31;ClinGen-CA8593930|ESP-rs145473485|ExAC-rs145473485|TOPMed-rs145473485|gnomAD-rs145473485]	N/A
rs41301139	G	A	0.1828(BENIGN)	-7.682	N/A	SLC14A2	cGc/cAc	+	27.9	[ENSP00000465953.1(ENST00000586448.5), ENSP00000255226.5(ENST00000255226.11)]	N/A	Q15849	Q15849-1;896;Arg/His;missense;[ENSP00000465953.1(ENST00000586448.5), ENSP00000255226.5(ENST00000255226.11)]	Urea transporter 2	896	Arg/His	missense	N/A	CHAIN-Urea transporter 2;Range:1-920	Evidence at protein level	920	2024-03-27	2010-03-23	RHEA:32799(PubMed:[11502588,17702749])|RHEA:32799(PubMed:[8647271,8997401])	Interacts with SNAPIN which enhances its urea transport activity	Apical cell membrane;Cell membrane(Multi-pass membrane protein;Multi-pass membrane protein)	Belongs to the urea transporter family	Q8WVX3-2(C4orf3);Q96FZ5(CMTM7);Q08426(EHHADH);O43561-2(LAT);Q7Z4F1(LRP10);P26678(PLN);Q04941(PLP2);Q96IW7(SEC22A);Q5BJF2(TMEM97);P01375(TNF);A5PKU2(TUSC5);O95183(VAMP5);O95295(SNAPIN)	N/A	Q15849-Q8WVX3;A residues:736 737 738 739 740 741 742 743 744 745 746 747 748 749 768 772 776 777 778 779 780 781 782 783 784 785 786 787 788 789 790 791 792 794 795 800 803 804 816 820 821 825 826 827 828 829 830 831 832 833 834 835 836 839 880 896;B residues:50 51 52 53 54 55 56 57 58 59 60 61 62 63 64 65 66;pDockQ:0.255285	foldxDdg:0.771091;plddt:96.3	0.73	NC_000018.10:g.45682443G>A	18q12.3	ClinGen-CA8947170|1000Genomes-rs41301139;MAF:0.005192|ESP-rs41301139|ExAC-rs41301139|TOPMed-rs41301139|gnomAD-rs41301139	N/A	[Arg>Cys;NC_000018.10:g.45682442C>T;18q12.3;ClinGen-CA8947168|NCI-TCGA Cosmic-COSM2877443|ESP-rs201444739|ExAC-rs201444739|NCI-TCGA-rs201444739;MAF:1.591E-5|TOPMed-rs201444739|gnomAD-rs201444739][Arg>Gly;NC_000018.10:g.45682442C>G;18q12.3;ClinGen-CA8947169|ESP-rs201444739|ExAC-rs201444739|TOPMed-rs201444739|gnomAD-rs201444739][Arg>Leu;NC_000018.10:g.45682443G>T;18q12.3;ClinGen-CA8947171|1000Genom…	N/A
rs78626055	A	G	0.3267(BENIGN)	-8.076	N/A	MYO5B	cUg/cCg	-	26.4	[ENSP00000285039.6(ENST00000285039.12)]	N/A	Q9ULV0	Q9ULV0-1;59;Leu/Pro;missense;[ENSP00000285039.6(ENST00000285039.12)]	Unconventional myosin-Vb	59	Leu/Pro	missense	N/A	CHAIN-Unconventional myosin-Vb;Range:1-1848|DOMAIN-Myosin N-terminal SH3-like;Range:8-60(PROSITE-ProRule:[PRU01190])	Evidence at protein level	1848	2024-01-24	2010-05-18	N/A	Component of the CART complex, at least composed of ACTN4, HGS/HRS, MYO5B and TRIM3	Cytoplasm	Belongs to the TRAFAC class myosin-kinesin ATPase superfamily	Q9Y2J4-4(AMOTL2);Q12982(BNIP2);P15884(TCF4);Q9BYV2(TRIM54);Q9Y2J4(AMOTL2);Q7L5A3(ATOSB);Q12982(BNIP2);Q5JST6(EFHC2);Q96IK5(GMCL1);A8MW99(MEI4);Q6FHY5(MEOX2);P62491(RAB11A);Q15907(RAB11B);P57735(RAB25);P15884-3(TCF4);O75382(TRIM3);Q9BYV2(TRIM54);O43257(ZNHIT1)	pocket_id:33;rad_gyration:4.071549;energy_per_vol:0.401913;buriedness:0.813084;resid:14 15 16 22 38 50 51 52 53 56 58 59 60 61;mean_plddt:83.91571428571429;score:723.3767859468122|pocket_id:20;rad_gyration:4.748841;energy_per_vol:0.350455;buriedness:0.753176;resid:1 2 3 6 7 31 56 57 58 59 60 61 62 78 79 80 81 691 750 751;mean_plddt:76.2755;score:664.2104001560239	N/A	foldxDdg:2.89424;plddt:83.71	0.974	NC_000018.10:g.50040277A>G	18q21.1	ClinGen-CA8961954|ClinVar-RCV000381499;Benign|ClinVar-RCV001515814;Benign|1000Genomes-rs78626055;MAF:0.01258|ESP-rs78626055|ExAC-rs78626055|TOPMed-rs78626055|dbSNP-rs78626055|gnomAD-rs78626055	Congenital microvillous atrophy (DIAR2)-(ClinVar:[RCV000381499])	N/A	N/A
rs116843064	G	A	0.4339(AMBIGUOUS)	-11.788	N/A	ANGPTL4	Gag/Aag	+	31	[ENSP00000472551.1(ENST00000593998.5), ENSP00000301455.1(ENST00000301455.7)]	N/A	Q9BY76	Q9BY76-1;40;Glu/Lys;missense;[ENSP00000472551.1(ENST00000593998.5), ENSP00000301455.1(ENST00000301455.7)]|Q9BY76-2;40;Glu/Lys;missense;[ENSP00000377534.1(ENST00000393962.6)]|M0R0N8;40;Glu/Lys;missense;[ENSP00000471345.1(ENST00000601770.1)]|M0QZ51;40;Glu/Lys;missense;[ENSP00000470307.1(ENST00000601886.1)]|M0R369;40;Glu/Lys;missense;[ENSP00000473025.1(ENST00000595079.5)]|M0R3A2;40;Glu/Lys;missense;…	Angiopoietin-related protein 4	40	Glu/Lys	missense	MUTAGEN-Loss of inactivation of lipoprotein lipase LPL.(PubMed:[19270337])|MUTAGEN-Decreased inactivation of lipoprotein lipase LPL.(PubMed:[19270337])	CHAIN-Angiopoietin-related protein 4;Range:26-406|CHAIN-ANGPTL4 N-terminal chain;Range:26-163()	Evidence at protein level	406	2024-01-24	2002-11-08	N/A	Homooligomer; disulfide-linked via Cys residues in the N-terminal part of the protein (PubMed:19270337)	Secreted;Secreted, extracellular space, extracellular matrix	N/A	Q9BY76(ANGPTL4);P05556(ITGB1);P18084(ITGB5)	pocket_id:5;rad_gyration:5.87571;energy_per_vol:0.354357;buriedness:0.797122;resid:33 34 35 36 38 40 41 42 44 45 48 129 130 131 132 133 134 136 137 140;mean_plddt:70.38550000000001;score:580.3331862794353	N/A	foldxDdg:1.05688;plddt:69.14	0.772	NC_000019.10:g.8364439G>A	19p13.2	ClinGen-CA117034|ClinVar-RCV000004977;MAF:0.00938|UniProt-VAR_032643;Benign|1000Genomes-rs116843064;MAF:0.009385|ESP-rs116843064|ExAC-rs116843064|TOPMed-rs116843064|dbSNP-rs116843064|gnomAD-rs116843064	Plasma triglyceride level quantitative trait locus (TGQTL)-(ClinVar:[RCV000004977])	N/A	N/A
rs12975366	T	C	0.2209(BENIGN)	-6.148	N/A	LILRB5	gAu/gGu	-	22.2	[ENSP00000320390.5(ENST00000316219.9)]	N/A	O75023	O75023-1;247;Asp/Gly;missense;[ENSP00000320390.5(ENST00000316219.9)]|O75023-2;147;Asp/Gly;missense;[ENSP00000263430.8(ENST00000345866.10)]|O75023-3;247;Asp/Gly;missense;[ENSP00000406478.1(ENST00000449561.3)]	Leukocyte immunoglobulin-like receptor subfamily B member 5	247	Asp/Gly	missense	N/A	CHAIN-Leukocyte immunoglobulin-like receptor subfamily B member 5;Range:24-590|TOPO_DOM-Extracellular;Range:24-458()|DOMAIN-Ig-like C2-type 3;Range:224-313|DISULFID-;Range:244-295(PROSITE-ProRule:[PRU00114])	Evidence at protein level	590	2024-01-24	2022-02-23	N/A	N/A	Membrane(Single-pass type I membrane protein)	N/A	N/A	pocket_id:23;rad_gyration:3.539681;energy_per_vol:0.35613;buriedness:0.796296;resid:222 223 224 225 227 245 246 247 248 275 310;mean_plddt:94.94363636363636;score:522.7100246135474	N/A	foldxDdg:0.0394338;plddt:93.53	0.642	NC_000019.10:g.54255498T>C	19q13.42	ClinGen-CA309429833|UniProt-VAR_061316|1000Genomes-rs12975366;MAF:0.2708|ESP-rs12975366|ExAC-rs12975366|TOPMed-rs12975366|dbSNP-rs12975366|gnomAD-rs12975366	N/A	[Asp>Ala;NC_000019.10:g.54255498T>G;19q13.42;ClinGen-CA309429834|1000Genomes-rs12975366;MAF:0.2708|ESP-rs12975366|ExAC-rs12975366|TOPMed-rs12975366|gnomAD-rs12975366]	N/A
rs187429064	A	G	0.5175(AMBIGUOUS)	-11.161	N/A	TM6SF2	cUu/cCu	-	28.6	[ENSP00000374014.2(ENST00000389363.5)]	N/A	Q9BZW4	Q9BZW4-1;156;Leu/Pro;missense;[ENSP00000374014.2(ENST00000389363.5)]	Transmembrane 6 superfamily member 2	156	Leu/Pro	missense	N/A	CHAIN-Transmembrane 6 superfamily member 2;Range:1-377|TRANSMEM-Helical; Name=5;Range:140-160()|DOMAIN-EXPERA 1;Range:61-186(PROSITE-ProRule:[PRU01087])	Evidence at protein level	377	2024-01-24	2010-11-30	N/A	N/A	Endoplasmic reticulum membrane;Endoplasmic reticulum-Golgi intermediate compartment membrane(Multi-pass membrane protein;Multi-pass membrane protein)	Belongs to the TM6SF family	Q3SXY8(ARL13B);Q9BXK5(BCL2L13);Q5JX71(FAM209A);P31937(HIBADH);P48051(KCNJ6);P15941-11(MUC1);P15151(PVR);Q9NY72(SCN3B);Q8WWF3(SSMEM1);Q9BZW4(TM6SF2);Q96Q45-2(TMEM237)	pocket_id:1;rad_gyration:6.052472;energy_per_vol:0.574223;buriedness:0.983709;resid:17 20 21 24 30 35 36 37 39 40 41 43 44 71 73 74 75 77 78 81 92 93 95 96 101 103 104 109 111 112 113 115 116 120 124 148 151 152 155 156 159 171 172 173 174 175 178 179 308 312;mean_plddt:91.8532;score:992.759976300363	Q8WWF3-Q9BZW4;A residues:1 2 3 4 5 6 7 8 9 10 11 12 13 39 40 41 42 43 44 45 46 47 48 49 50 51 52 53 54 55 56 57 58 59 60 61 64 65 125 126 127 128 129 130 131 132 133 134 135 136 139 204 205 206 207 208 209 210 211 212 213 214 216;B residues:1 2 3 4 5 6 7 22 25 26 80 81 82 83 84 85 86 87 88 89 90 91 92 93 94 95 97 98 102 104 105 106 110 111 114 115 118 119 120 121 122 123 124 125 126 127 128 129 1…	foldxDdg:7.47374;plddt:91.42	0.692	NC_000019.10:g.19269704A>G	19p13.11	ClinGen-CA9324790|1000Genomes-rs187429064;MAF:0.003594|ESP-rs187429064|ExAC-rs187429064|TOPMed-rs187429064|gnomAD-rs187429064	N/A	[Leu>Phe;NC_000019.10:g.19269705G>A;19p13.11;ClinGen-CA306285182|ESP-rs368135661|gnomAD-rs368135661][Leu>Ile;NC_000019.10:g.19269705G>T;19p13.11;ClinGen-CA404926137|ESP-rs368135661|gnomAD-rs368135661]	N/A
rs1800961	C	T	0.4275(AMBIGUOUS)	-7.959	N/A	HNF4A	aCu/aUu	+	21.4	[ENSP00000312987.3(ENST00000316099.10)]	N/A	P41235	P41235-1;139;Thr/Ile;missense;[ENSP00000312987.3(ENST00000316099.10)]|P41235-2;139;Thr/Ile;missense;[ENSP00000412111.1(ENST00000415691.2)]|P41235-3;139;Thr/Ile;missense;[ENSP00000410911.2(ENST00000443598.6)]|P41235-5;117;Thr/Ile;missense;[ENSP00000315180.4(ENST00000316673.9)]|P41235-6;117;Thr/Ile;missense;[ENSP00000396216.1(ENST00000457232.5)]|F1D8T1;139;Thr/Ile;missense;[ENSP00000312987.3(ENST00…	Hepatocyte nuclear factor 4-alpha	139	Thr/Ile	missense	N/A	CHAIN-Hepatocyte nuclear factor 4-alpha;Range:1-474	Evidence at protein level	474	2024-01-24	2007-05-29	N/A	Homodimerization is required for HNF4-alpha to bind to its recognition site (PubMed:14982928)	Nucleus	Belongs to the nuclear hormone receptor family	Q99967(CITED2);A8MYZ6(FOXO6);P04150(NR3C1);Q9UBK2(PPARGC1A);Q92786(PROX1);P23246(SFPQ);Q12772(SREBF2);P11532(DMD);O14602(EIF1AY);O43688(PLPP2)	N/A	N/A	foldxDdg:-0.116116;plddt:63.63	0.415	NC_000020.11:g.44413724C>T	20q13.12	ClinGen-CA153114|ClinVar-RCV000117238;Benign|ClinVar-RCV000280314;Benign|ClinVar-RCV000337755;Benign|ClinVar-RCV000445529;Benign|ClinVar-RCV001521057;Benign|ClinVar-RCV002226673;Benign|ClinVar-RCV002453432;Benign|UniProt-VAR_004669|1000Genomes-rs1800961;MAF:0.02396|ESP-rs1800961|ExAC-rs1800961|TOPMed-rs1800961|dbSNP-rs1800961|gnomAD-rs1800961	Familial hyperinsulinism-(pubmed:[20301549]ClinVar:[RCV000280314])|Maturity onset diabetes mellitus in young (MODY)-(pubmed:[29792621]ClinVar:[RCV002453432])|Maturity-onset diabetes of the young type 1-(pubmed:[29792621]ClinVar:[RCV000337755])|Monogenic diabetes-(ClinVar:[RCV000445529])|Type II diabetes mellitus-(pubmed:[20301750,22962670,23492873]ClinVar:[RCV002226673])	[Thr>Pro;NC_000020.11:g.44413723A>C;20q13.12;ClinGen-CA409105499|ExAC-rs779271027|gnomAD-rs779271027][Thr>Ala;NC_000020.11:g.44413723A>G;20q13.12;ClinGen-CA9870231|ExAC-rs779271027|gnomAD-rs779271027]	4iqr;B100,F100;2.9;X-ray diffraction
rs186765281	A	G	0.0979(BENIGN)	-5.674	N/A	GGT1	Auc/Guc	+	17.16	[ENSP00000383232.1(ENST00000400382.6), ENSP00000383231.1(ENST00000400380.5)]	N/A	P19440	E7ETR7;93;Ile/Val;missense;[ENSP00000395271.1(ENST00000419133.5)]|E7ETN1;93;Ile/Val;missense;[ENSP00000415024.1(ENST00000455483.5)]|E7ENJ5;93;Ile/Val;missense;[ENSP00000389935.1(ENST00000411974.5)]|E7ETU4;93;Ile/Val;missense;[ENSP00000398589.1(ENST00000432867.5)]|E7ET76;93;Ile/Val;missense;[ENSP00000393537.1(ENST00000412658.5)]|E7ETJ6;93;Ile/Val;missense;[ENSP00000415553.1(ENST00000452551.5)]|E7E…	Glutathione hydrolase 1 proenzyme	93	Ile/Val	missense	N/A	CHAIN-Glutathione hydrolase 1 heavy chain;Range:1-380|TOPO_DOM-Extracellular;Range:27-569(UniProtKB:[P07314])|STRAND;Range:87-95(PDB:[4GDX])	Evidence at protein level	569	2024-01-24	2006-03-07	RHEA:23904(PubMed:[17924658,21447318,23682772,7673200,7759490,8095045,8827453])|RHEA:28807(PubMed:[17924658,21447318])|RHEA:59468(PubMed:[17924658,21447318,27791009])|RHEA:31563(PubMed:[21447318])|RHEA:53512(PubMed:[27791009])	Heterodimer composed of the light and heavy chains	Cell membrane(Single-pass type II membrane protein)	Belongs to the gamma-glutamyltransferase family	Q92993(KAT5);Q8TAP4-4(LMO3);P17252(PRKCA);Q15047-2(SETDB1);P61981(YWHAG)	pocket_id:7;rad_gyration:5.507587;energy_per_vol:0.412876;buriedness:0.836735;resid:93 94 95 98 99 100 101 102 147 148 261 262 263 264 265 266 275;mean_plddt:97.9135294117647;score:879.7706090012508	N/A	foldxDdg:1.28229;plddt:98.89	0.805	NC_000022.11:g.24614888A>G	22q11.23	ClinGen-CA10154279|1000Genomes-rs186765281;MAF:0.004393|ESP-rs186765281|ExAC-rs186765281|TOPMed-rs186765281|gnomAD-rs186765281	N/A	[Ile>Met;NC_000022.11:g.24614890C>G;22q11.23;ClinGen-CA410971119|TOPMed-rs1253960818|gnomAD-rs1253960818][Ile>Thr;NC_000022.11:g.24614889T>C;22q11.23;ClinGen-CA410971113|gnomAD-rs1232281995]	4zc6;A66;2.1;X-ray diffraction|7ld9;A66;1.42;X-ray diffraction|4zcg;A66;2.22;X-ray diffraction|7la5;A66;2.07;X-ray diffraction|4z9o;A66;2.3;X-ray diffraction|4zbk;A66;2.18;X-ray diffraction|5v4q;A66;2.2;X-ray diffraction|4gg2;A66;2.21;X-ray diffraction|7lbc;A66;2.28;X-ray diffraction|6xpb;A66;1.74;X-ray diffraction|4gdx;A93;1.67;X-ray diffraction|6xpc;A66;2.26;X-ray diffraction
