# Supplementary material for: Transforming polygenic risk prediction: functional annotation and digital twin modeling with whole-exome sequencing
Source: Research Square preprint supplement (doi:10.21203/rs.3.rs-6169446/v1), 2025-03-10
Supplement: Supplementary file 4 [file 4433814190bbac0a31a20b1e.xlsx]

## Sheet: Description
Supplementary Data 1	Supplementary information on single-variant association testing and post-association analysis
Table S1	Summary statistics of the single-variant association analysis using the exome-based reference dataset (Base dataset). Summary statistics for the UK Biobank base dataset (N=73,817). Association analyses were performed with REGENIE1. Rank-based inverse normal transformation was applied to each measurement. Models were adjusted for age, sex, and the first 40 principal components from the population …
Table S2	Summary statistics of the single-variant association analysis using the imputed array-based reference dataset (Base dataset). Summary statistics for the UK Biobank base dataset (N=73,817). Association analyses were performed with REGENIE1. Rank-based inverse normal transformation was applied to each measurement. Models were adjusted for age, gender, and the first 40 principal components from the …
Table S3	List of associated genetic variants from the exome-base summary statistics previously reported in PhenoScanner2. Information about previously reported genetic variants from the UK Biobank exome-based summary statistics (rsID: dbSNP identifier, Ref: reference allele, Alt: alternative allele, N: sample size, SE: standard error).
Table S4	List of associated genetic variants from the imputed-array summary statistics previously reported in PhenoScanner2. Information about previously reported genetic variants from the UK Biobank imputed array-based summary statistics (rsID: dbSNP identifier, Ref: reference allele, Alt: alternative allele, N: sample size, SE: standard error).
Table S5	List of associated genetic variants from the exome-base summary statistics previously reported in GWAS catalog (not included in PhenoScanner2).
Table S6	List of associated genetic variants from the imputed-array summary statistics previously reported in GWAS catalog (not included in PhenoScanner2).
Table S7	Summary of novel genetic variants identified in the exome-base dataset (base dataset).
Table S8	Summary of novel genetic variants identified in the imputed array-base dataset (base dataset).
Table S9	Genetic correlation estimates obtained from the individual-level genotype data from the base datasets. Genetic correlation values for the exome-based and imputed-array dataset from the reference dataset (UK Biobank). Measurements were estimated using SCORE4 (SE: standard error).

## Sheet: Table S1
rsID	Chromosome	Position (hg19)	Ref	Alt	MAF	Estimate	SE	Chi-Sq	Log10 P-value	P-value	Z-value	Measurement	Gene	Feature type (VEP)
rs10493176	1	55538552	T	G	0.0775616	-0.0613682	0.00933338	43.2324	10.3133	4.86071e-11	-6.57513	LDL	USP24	intron_variant, non_coding_transcript_exon_variant, intron_variant&non_coding_transcript_variant
rs10493176	1	55538552	T	G	0.0775616	-0.0569247	0.00910791	39.0629	9.38683	4.10365e-10	-6.25003	APOB	USP24	intron_variant, non_coding_transcript_exon_variant, intron_variant&non_coding_transcript_variant
rs10493176	1	55538552	T	G	0.0775616	-0.0531299	0.00940617	31.9046	7.79066	1.61935e-08	-5.64841	CHO	USP24	intron_variant, non_coding_transcript_exon_variant, intron_variant&non_coding_transcript_variant
rs10889335	1	62960101	A	G	0.360955	-0.0398787	0.00516947	59.5099	13.9148	1.21675e-14	-7.71427	LDL	DOCK7	synonymous_variant, non_coding_transcript_exon_variant
rs10889335	1	62960101	A	G	0.360955	-0.0313863	0.00485699	41.7585	9.98602	1.03271e-10	-6.46209	APOA	DOCK7	synonymous_variant, non_coding_transcript_exon_variant
rs10889335	1	62960101	A	G	0.360955	-0.0295125	0.00504459	34.2262	8.30923	4.90648e-09	-5.85033	APOB	DOCK7	synonymous_variant, non_coding_transcript_exon_variant
rs10889335	1	62960101	A	G	0.360955	-0.0528463	0.00520979	102.894	23.4514	3.53671e-24	-10.1437	CHO	DOCK7	synonymous_variant, non_coding_transcript_exon_variant
rs10889335	1	62960101	A	G	0.360955	-0.0806238	0.0051644	243.718	54.2159	6.08275e-55	-15.6115	TRIG	DOCK7	synonymous_variant, non_coding_transcript_exon_variant
rs1130564	1	21952884	G	A	0.060775	-0.191677	0.0103729	341.458	75.5127	3.07114e-76	-18.4786	ALP	RAP1GAP	synonymous_variant, 5_prime_UTR_variant, non_coding_transcript_exon_variant, upstream_gene_variant, 5_prime_UTR_variant&NMD_transcript_variant
rs1130564	1	21952884	G	A	0.060775	0.0785168	0.010487	56.0561	13.1522	7.04369e-14	7.48706	PHOS	RAP1GAP	synonymous_variant, 5_prime_UTR_variant, non_coding_transcript_exon_variant, upstream_gene_variant, 5_prime_UTR_variant&NMD_transcript_variant
rs1137101	1	66058513	A	G	0.440728	-0.0578781	0.00508693	129.455	29.2681	5.39386e-30	-11.3778	CRP	LEPR	missense_variant, intron_variant, non_coding_transcript_exon_variant
rs114328096	1	65898364	A	T	0.0187689	-0.104071	0.0186142	31.259	7.64627	2.25803e-08	-5.59095	CRP	LEPR, LEPROT	intron_variant, 3_prime_UTR_variant, downstream_gene_variant
rs11591147	1	55505647	G	T	0.0194373	-0.385344	0.01802	457.282	100.727	1.87499e-101	-21.3842	LDL	PCSK9	missense_variant, upstream_gene_variant
rs11591147	1	55505647	G	T	0.0194373	-0.371143	0.0175847	445.463	98.1545	7.00648e-99	-21.106	APOB	PCSK9	missense_variant, upstream_gene_variant
rs11591147	1	55505647	G	T	0.0194373	-0.341484	0.0181606	353.574	78.151	7.06318e-79	-18.8036	CHO	PCSK9	missense_variant, upstream_gene_variant
rs1198423	1	23735241	T	G	0.130474	-0.0389001	0.00706195	30.3425	7.44117	3.62101e-08	-5.50841	GGT	TCEA3, RP4-654C18.1	intron_variant, intron_variant&non_coding_transcript_variant, upstream_gene_variant
rs1318235	1	21944397	A	G	0.0502078	0.100215	0.0113514	77.9418	17.9742	1.06121e-18	8.82843	ALP	RAP1GAP	intron_variant, intron_variant&non_coding_transcript_variant, downstream_gene_variant, intron_variant&NMD_transcript_variant
rs1318235	1	21944397	A	G	0.0502078	-0.0684832	0.0114762	35.61	8.6179	2.41046e-09	-5.96741	PHOS	RAP1GAP	intron_variant, intron_variant&non_coding_transcript_variant, downstream_gene_variant, intron_variant&NMD_transcript_variant
rs1417938	1	159684186	T	A	0.309263	0.132933	0.00549533	585.163	128.549	2.82488e-129	24.1902	CRP	CRP	intron_variant, upstream_gene_variant
rs142246501	1	21616932	G	T	0.129236	-0.0498965	0.00738092	45.7004	10.8608	1.37784e-11	-6.7602	ALP	ECE1, RP5-1071N3.1	upstream_gene_variant, 5_prime_UTR_variant, intron_variant, intron_variant&non_coding_transcript_variant, non_coding_transcript_exon_variant
rs149686267	1	161600109	C	T	0.127453	0.0709433	0.00775569	83.6725	19.2337	5.83848e-20	9.14726	TPROT	FCGR3B, FCGR2B, FCGR3A	intron_variant, upstream_gene_variant, non_coding_transcript_exon_variant
rs150959892	1	21944041	G	A	0.0294647	-0.132677	0.014623	82.3219	18.9369	1.15638e-19	-9.07317	ALP	RAP1GAP	intron_variant, intron_variant&non_coding_transcript_variant, downstream_gene_variant, intron_variant&NMD_transcript_variant
rs17360994	1	27278573	T	C	0.0795556	-0.0522376	0.00903507	33.4275	8.13094	7.39707e-09	-5.78165	IGF1	C1orf172	missense_variant
rs17360994	1	27278573	T	C	0.0795556	-0.0684689	0.00862878	62.9633	14.6766	2.10572e-15	-7.93495	SHBG	C1orf172	missense_variant
rs17513135	1	40035686	C	T	0.230772	-0.0356882	0.00557269	41.0128	9.82036	1.51231e-10	-6.40412	APOA	SNORA55, PABPC4, RP11-69E11.8	upstream_gene_variant, splice_polypyrimidine_tract_variant&intron_variant, intron_variant&non_coding_transcript_variant, downstream_gene_variant, splice_polypyrimidine_tract_variant&intron_variant&NMD_transcript_variant, splice_polypyrimidine_tract_variant&intron_variant&non_coding_transcript_variant
rs17513135	1	40035686	C	T	0.230772	-0.0400953	0.00551665	52.8246	12.4381	3.6467e-13	-7.26805	HDL	SNORA55, PABPC4, RP11-69E11.8	upstream_gene_variant, splice_polypyrimidine_tract_variant&intron_variant, intron_variant&non_coding_transcript_variant, downstream_gene_variant, splice_polypyrimidine_tract_variant&intron_variant&NMD_transcript_variant, splice_polypyrimidine_tract_variant&intron_variant&non_coding_transcript_variant
rs17513135	1	40035686	C	T	0.230772	-0.0353694	0.00556701	40.3656	9.67651	2.10615e-10	-6.35339	SHBG	SNORA55, PABPC4, RP11-69E11.8	upstream_gene_variant, splice_polypyrimidine_tract_variant&intron_variant, intron_variant&non_coding_transcript_variant, downstream_gene_variant, splice_polypyrimidine_tract_variant&intron_variant&NMD_transcript_variant, splice_polypyrimidine_tract_variant&intron_variant&non_coding_transcript_variant
rs1767430	1	21887290	C	A	0.388365	0.0429043	0.00509463	70.9213	16.4297	3.71792e-17	8.42148	ALP	ALPL	intron_variant, intron_variant&non_coding_transcript_variant
rs1800947	1	159683438	C	G	0.0620015	-0.255495	0.0105151	590.387	129.685	2.06538e-130	-24.2979	CRP	CRP	synonymous_variant, splice_region_variant&splice_polypyrimidine_tract_variant&intron_variant, intron_variant, non_coding_transcript_exon_variant, intron_variant&non_coding_transcript_variant
rs1801274	1	161479745	G	A	0.467185	-0.0528191	0.00517524	104.165	23.7302	1.86123e-24	-10.2061	TPROT	FCGR2A, RP11-25K21.6	missense_variant, upstream_gene_variant, missense_variant&NMD_transcript_variant, non_coding_transcript_exon_variant, downstream_gene_variant, 3_prime_UTR_variant&NMD_transcript_variant
rs1827293	1	21795388	G	A	0.456187	0.115649	0.00496301	542.995	119.376	4.20727e-120	23.3022	ALP	NBPF3	missense_variant&splice_region_variant, intron_variant, upstream_gene_variant, downstream_gene_variant
rs1827293	1	21795388	G	A	0.456187	-0.0806	0.00501759	258.036	57.3373	4.59939e-58	-16.0635	PHOS	NBPF3	missense_variant&splice_region_variant, intron_variant, upstream_gene_variant, downstream_gene_variant
rs1875763	1	161696998	G	C	0.4896	-0.0432149	0.00515763	70.2046	16.272	5.34564e-17	-8.37883	TPROT	FCRLB	intron_variant, intron_variant&non_coding_transcript_variant
rs2072654	1	21671943	G	T	0.459542	-0.0299662	0.00495984	36.5028	8.81689	1.52444e-09	-6.04177	ALP	ECE1	5_prime_UTR_variant, upstream_gene_variant
rs2072931	1	25747399	T	G	0.443243	-0.0320587	0.00487783	43.1955	10.3051	4.95336e-11	-6.57233	APOB	RHCE	upstream_gene_variant, intron_variant, non_coding_transcript_exon_variant
rs2075570	1	155182164	T	C	0.491683	0.0316938	0.00478798	43.8172	10.4431	3.60496e-11	6.61945	GGT	GBAP1, MTX1, THBS3, RP11-263K19.6	downstream_gene_variant, splice_polypyrimidine_tract_variant&intron_variant, upstream_gene_variant, splice_polypyrimidine_tract_variant&intron_variant&NMD_transcript_variant, intron_variant&non_coding_transcript_variant, splice_polypyrimidine_tract_variant&intron_variant&non_coding_transcript_variant
rs2075570	1	155182164	T	C	0.491683	0.0273469	0.00499369	29.9898	7.36218	4.3433e-08	5.47629	URA	GBAP1, MTX1, THBS3, RP11-263K19.6	downstream_gene_variant, splice_polypyrimidine_tract_variant&intron_variant, upstream_gene_variant, splice_polypyrimidine_tract_variant&intron_variant&NMD_transcript_variant, intron_variant&non_coding_transcript_variant, splice_polypyrimidine_tract_variant&intron_variant&non_coding_transcript_variant
rs2075570	1	155182164	T	C	0.491683	0.0343096	0.00433712	62.5791	14.5918	2.55976e-15	7.91069	URT	GBAP1, MTX1, THBS3, RP11-263K19.6	downstream_gene_variant, splice_polypyrimidine_tract_variant&intron_variant, upstream_gene_variant, splice_polypyrimidine_tract_variant&intron_variant&NMD_transcript_variant, intron_variant&non_coding_transcript_variant, splice_polypyrimidine_tract_variant&intron_variant&non_coding_transcript_variant
rs2232015	1	107599258	A	T	0.341011	0.0441092	0.00495489	79.2482	18.2614	5.47772e-19	8.90216	SHBG	PRMT6	upstream_gene_variant
rs28383572	1	159558150	G	A	0.0229713	0.102916	0.0168887	37.134	8.95749	1.10283e-09	6.09378	CRP	APCS	synonymous_variant
rs35995150	1	113264930	C	G	0.133463	0.0533199	0.00611701	75.9802	17.5428	2.8655e-18	8.71666	CREA	FAM19A3, RP11-426L16.9	synonymous_variant, downstream_gene_variant
rs3738055	1	89426902	A	G	0.499303	0.0277201	0.00476296	33.8717	8.23011	5.88695e-09	5.81993	GGT	CCBL2	synonymous_variant, 3_prime_UTR_variant, non_coding_transcript_exon_variant
rs3895559	1	109813020	G	A	0.460157	0.0521505	0.00499741	108.9	24.7677	1.70726e-25	10.4355	LDL	CELSR2	intron_variant, downstream_gene_variant, non_coding_transcript_exon_variant, upstream_gene_variant
rs3895559	1	109813020	G	A	0.460157	0.0676399	0.00487669	192.378	43.0168	9.62055e-44	13.87	APOB	CELSR2	intron_variant, downstream_gene_variant, non_coding_transcript_exon_variant, upstream_gene_variant
rs3895559	1	109813020	G	A	0.460157	0.0428168	0.00503639	72.2755	16.7278	1.87154e-17	8.50149	CHO	CELSR2	intron_variant, downstream_gene_variant, non_coding_transcript_exon_variant, upstream_gene_variant
rs4061675	1	21793527	C	T	0.0503971	-0.109698	0.0113299	93.7452	21.4451	3.58839e-22	-9.68217	ALP	NBPF3	5_prime_UTR_variant, intron_variant, intron_variant&non_coding_transcript_variant
rs41287288	1	51760147	T	C	0.024975	0.122644	0.0164523	55.5704	13.0449	9.01779e-14	7.45452	CAL	TTC39A	synonymous_variant, downstream_gene_variant, non_coding_transcript_exon_variant
rs5068	1	11905974	A	G	0.0535185	-0.0726479	0.0105465	47.4493	11.2484	5.64417e-12	-6.88834	SBP	CLCN6, NPPA, NPPA-AS1	downstream_gene_variant, 3_prime_UTR_variant, intron_variant&non_coding_transcript_variant
rs5068	1	11905974	A	G	0.0535185	-0.0659772	0.0111411	35.0695	8.49737	3.18149e-09	-5.92196	DBP	CLCN6, NPPA, NPPA-AS1	downstream_gene_variant, 3_prime_UTR_variant, intron_variant&non_coding_transcript_variant
rs526513	1	16731661	C	T	0.489642	-0.0440346	0.00476826	85.2841	19.5876	2.58464e-20	-9.23494	GGT	SPATA21	intron_variant, intron_variant&non_coding_transcript_variant, upstream_gene_variant
rs1767430	1	21902436	G	T	0.0350508	0.0746423	0.0134766	30.6768	7.516	3.04789e-08	5.53866	ALP	ALPL	intron_variant
rs61816761	1	152285861	G	A	0.0237089	0.122323	0.0168717	52.5654	12.3807	4.16198e-13	7.25019	VITD	FLG, FLG-AS1	stop_gained, upstream_gene_variant, intron_variant&non_coding_transcript_variant
rs6413830	1	176832552	G	A	0.394765	-0.028646	0.00499251	32.9222	8.01808	9.59224e-09	-5.7378	IGF1	ASTN1	3_prime_UTR_variant, intron_variant
rs6588153	1	66092017	T	A	0.368611	-0.131456	0.00524427	628.332	137.938	1.15345e-138	-25.0666	CRP	LEPR	downstream_gene_variant, intron_variant
rs6664608	1	154479670	T	C	0.354375	0.0341581	0.00517879	43.5043	10.3736	4.23058e-11	6.59577	ALP	TDRD10	intron_variant
rs6664608	1	154479670	T	C	0.354375	0.058723	0.00528662	123.385	27.9398	1.14868e-28	11.1079	CRP	TDRD10	intron_variant
rs6667814	1	109815746	A	G	0.0414342	-0.0948675	0.0124723	57.8548	13.5494	2.82228e-14	-7.60626	LDL	CELSR2	intron_variant, intron_variant&non_coding_transcript_variant
rs6667814	1	109815746	A	G	0.0414342	-0.119474	0.012171	96.3592	22.0185	9.58297e-23	-9.81628	APOB	CELSR2	intron_variant, intron_variant&non_coding_transcript_variant
rs6667814	1	109815746	A	G	0.0414342	-0.0810256	0.0125696	41.5529	9.94035	1.14723e-10	-6.44616	CHO	CELSR2	intron_variant, intron_variant&non_coding_transcript_variant
rs6676143	1	16528218	G	T	0.474127	0.0335624	0.00491816	46.5693	11.0534	8.84301e-12	6.82418	ALT	ARHGEF19, ARHGEF19-AS1	intron_variant, downstream_gene_variant, intron_variant&non_coding_transcript_variant
rs6676143	1	16528218	G	T	0.474127	0.0313753	0.00496153	39.9893	9.59284	2.55364e-10	6.32371	AST	ARHGEF19, ARHGEF19-AS1	intron_variant, downstream_gene_variant, intron_variant&non_coding_transcript_variant
rs6676143	1	16528218	G	T	0.474127	0.0650033	0.00475801	186.647	41.7657	1.71514e-42	13.6619	GGT	ARHGEF19, ARHGEF19-AS1	intron_variant, downstream_gene_variant, intron_variant&non_coding_transcript_variant
rs6694817	1	154401972	C	T	0.419855	0.0614798	0.00512441	143.939	32.436	3.66438e-33	11.9974	CRP	IL6R	intron_variant
rs685653	1	109759776	A	G	0.244241	0.0311751	0.00564646	30.4835	7.47272	3.36729e-08	5.52118	APOB	SARS	intron_variant, intron_variant&non_coding_transcript_variant, downstream_gene_variant
rs72662488	1	22307478	G	A	0.0210353	-0.103582	0.0172724	35.9639	8.6968	2.01002e-09	-5.99697	ALP	CELA3B, RN7SL421P	intron_variant, upstream_gene_variant
rs74733149	1	66075586	A	G	0.0827646	0.115583	0.00917023	158.865	35.6983	2.00309e-36	12.6042	CRP	LEPR	intron_variant, intron_variant&non_coding_transcript_variant
rs79794939	1	154390932	C	T	0.0760117	0.0544769	0.00951211	32.7998	7.99073	1.02157e-08	5.72711	CRP	IL6R, RP11-350G8.7	intron_variant, upstream_gene_variant
rs80145424	1	21799924	G	A	0.0159504	0.142953	0.0197392	52.4477	12.3547	4.41876e-13	7.24209	ALP	NBPF3	synonymous_variant, non_coding_transcript_exon_variant, downstream_gene_variant
rs80145424	1	21799924	G	A	0.0159504	-0.120242	0.0199562	36.304	8.77258	1.68818e-09	-6.0253	PHOS	NBPF3	synonymous_variant, non_coding_transcript_exon_variant, downstream_gene_variant
rs861212	1	21935433	G	T	0.486198	-0.0300813	0.00495833	36.8062	8.88447	1.30476e-09	-6.06682	ALP	RAP1GAP	splice_region_variant&splice_polypyrimidine_tract_variant&intron_variant, downstream_gene_variant, splice_region_variant&splice_polypyrimidine_tract_variant&intron_variant&NMD_transcript_variant
rs862999	1	159169641	C	T	0.266343	0.0343333	0.00570805	36.179	8.74472	1.80003e-09	6.01489	CRP	DARC, CADM3, CTA-134P22.2	upstream_gene_variant, synonymous_variant, non_coding_transcript_exon_variant, downstream_gene_variant
rs9427094	1	154557685	C	T	0.488213	-0.0391188	0.00506008	59.7664	13.9714	1.06807e-14	-7.73087	CRP	ADAR	splice_region_variant&intron_variant, splice_region_variant&intron_variant&non_coding_transcript_variant, downstream_gene_variant
rs9427094	1	154557685	C	T	0.488213	0.0278156	0.00467447	35.4088	8.57304	2.67276e-09	5.95054	SHBG	ADAR	splice_region_variant&intron_variant, splice_region_variant&intron_variant&non_coding_transcript_variant, downstream_gene_variant
rs10178552	2	25973309	C	T	0.337772	0.0388254	0.00518946	55.9742	13.1341	7.34345e-14	7.48159	IGF1	ASXL2	intron_variant
rs10199278	2	234160669	G	C	0.48027	0.052066	0.00491692	112.13	25.4755	3.3458e-26	10.5891	TBIL	ATG16L1	intron_variant, intron_variant&NMD_transcript_variant, intron_variant&non_coding_transcript_variant
rs1042591	2	234526794	T	G	0.015666	0.467889	0.0198745	554.23	121.82	1.51356e-122	23.5422	TBIL	UGT1A8	synonymous_variant
rs1047891	2	211540507	C	A	0.313436	0.046071	0.00447481	106	24.1324	7.37225e-25	10.2956	CREA	CPS1	missense_variant, non_coding_transcript_exon_variant
rs1047891	2	211540507	C	A	0.313436	-0.0336953	0.00534062	39.8065	9.5522	2.80414e-10	-6.30925	URA	CPS1	missense_variant, non_coding_transcript_exon_variant
rs1047891	2	211540507	C	A	0.313436	-0.0281489	0.00463773	36.8393	8.89185	1.28277e-09	-6.06954	URT	CPS1	missense_variant, non_coding_transcript_exon_variant
rs1048603	2	234394487	G	A	0.305898	0.0326053	0.00558537	34.0778	8.27612	5.29517e-09	5.83763	CAL	USP40	missense_variant, downstream_gene_variant, 3_prime_UTR_variant&NMD_transcript_variant, upstream_gene_variant, non_coding_transcript_exon_variant
rs1048603	2	234394487	G	A	0.305898	0.0557473	0.0053459	108.744	24.7337	1.84629e-25	10.428	TBIL	USP40	missense_variant, downstream_gene_variant, 3_prime_UTR_variant&NMD_transcript_variant, upstream_gene_variant, non_coding_transcript_exon_variant
rs10929306	2	234710831	G	C	0.230193	0.0667364	0.00584268	130.467	29.4897	3.23817e-30	11.4222	TBIL	MROH2A	synonymous_variant, non_coding_transcript_exon_variant
rs11125393	2	24276736	T	C	0.269828	-0.0338253	0.00550984	37.6883	9.08091	8.30023e-10	-6.13907	HBA1C	FKBP1B, C2orf44, MFSD2B	intron_variant, upstream_gene_variant, intron_variant&NMD_transcript_variant, intron_variant&non_coding_transcript_variant
rs112570954	2	234716027	T	A	0.0764809	-0.15483	0.00925015	280.164	62.1602	6.91512e-63	-16.7381	TBIL	MROH2A	intron_variant, downstream_gene_variant
rs1128919	2	148657117	G	A	0.301605	0.0260985	0.00452909	33.2056	8.08138	8.29125e-09	5.76242	CREA	ACVR2A, AC009480.3	synonymous_variant, non_coding_transcript_exon_variant, downstream_gene_variant
rs114932341	2	169783567	G	T	0.0453956	0.078771	0.0116765	45.5099	10.8185	1.5188e-11	6.74611	HBA1C	ABCB11	intron_variant, intron_variant&NMD_transcript_variant
rs114932341	2	169783567	G	T	0.0453956	0.0951312	0.0122221	60.5839	14.1518	7.05018e-15	7.78354	GLUC	ABCB11	intron_variant, intron_variant&NMD_transcript_variant
rs115377744	2	234327877	C	T	0.0109608	0.258515	0.0235558	120.441	27.2955	5.06407e-28	10.9746	TBIL	DGKD	intron_variant, intron_variant&non_coding_transcript_variant, upstream_gene_variant
rs11563071	2	234915540	C	G	0.0975061	0.0516468	0.0082774	38.9313	9.35754	4.38995e-10	6.2395	TBIL	TRPM8	synonymous_variant, 3_prime_UTR_variant&NMD_transcript_variant
rs11676272	2	25141538	A	G	0.484869	0.0399552	0.00516393	59.8667	13.9935	1.01508e-14	7.73736	BMI	ADCY3	missense_variant
rs11676792	2	234732317	A	G	0.455696	0.040077	0.00497535	64.8848	15.1001	7.94145e-16	8.05511	TBIL	MROH2A	splice_region_variant&intron_variant, upstream_gene_variant
rs11887534	2	44066247	G	C	0.0654747	-0.090219	0.0100486	80.6097	18.5607	2.74979e-19	-8.97827	LDL	ABCG5, ABCG8	upstream_gene_variant, missense_variant
rs11887534	2	44066247	G	C	0.0654747	-0.0771266	0.00980722	61.8467	14.4303	3.71279e-15	-7.86427	APOB	ABCG5, ABCG8	upstream_gene_variant, missense_variant
rs11887534	2	44066247	G	C	0.0654747	-0.0812878	0.0101278	64.4202	14.9977	1.00531e-15	-8.02621	CHO	ABCG5, ABCG8	upstream_gene_variant, missense_variant
rs12468017	2	234698097	T	C	0.15225	-0.210007	0.00685874	937.519	205.164	6.85488e-206	-30.6189	TBIL	MROH2A	intron_variant, intron_variant&non_coding_transcript_variant
rs12582	2	234749354	G	A	0.0908752	0.0969729	0.00859131	127.404	28.8194	1.51565e-29	11.2873	TBIL	HJURP	downstream_gene_variant, missense_variant, missense_variant&NMD_transcript_variant
rs12691202	2	21249716	C	T	0.0400875	-0.0991038	0.0126714	61.169	14.2808	5.23842e-15	-7.82106	LDL	APOB	missense_variant
rs12691202	2	21249716	C	T	0.0400875	-0.134465	0.0123671	118.219	26.8088	1.5531e-27	-10.8728	APOB	APOB	missense_variant
rs12691202	2	21249716	C	T	0.0400875	-0.0885009	0.0127713	48.0204	11.3749	4.21794e-12	-6.92967	CHO	APOB	missense_variant
rs12714102	2	21246306	G	C	0.0803741	-0.0675261	0.00915033	54.4591	12.7994	1.58708e-13	-7.37964	LDL	APOB	intron_variant, downstream_gene_variant
rs12714102	2	21246306	G	C	0.0803741	-0.0814838	0.00893055	83.2504	19.1409	7.22936e-20	-9.12416	APOB	APOB	intron_variant, downstream_gene_variant
rs12714102	2	21246306	G	C	0.0803741	-0.0703765	0.00922246	58.2321	13.6327	2.3297e-14	-7.63099	CHO	APOB	intron_variant, downstream_gene_variant
rs13011156	2	234171812	A	G	0.0541022	0.0943155	0.0108618	75.399	17.415	3.84592e-18	8.68323	TBIL	ATG16L1	intron_variant, synonymous_variant, 3_prime_UTR_variant&NMD_transcript_variant, 5_prime_UTR_variant, non_coding_transcript_exon_variant, upstream_gene_variant
rs13421952	2	100721050	G	A	0.492306	0.0316086	0.00517808	37.2627	8.98615	1.0324e-09	6.10431	TPROT	AFF3, AC092667.2	intron_variant, upstream_gene_variant
rs142217338	2	234728158	C	A	0.0117411	0.40979	0.0228541	321.511	71.1682	6.78891e-72	17.9307	TBIL	MROH2A	intron_variant
rs145966524	2	234356244	C	T	0.039375	-0.13261	0.0126552	109.804	24.9658	1.08193e-25	-10.4787	TBIL	DGKD	intron_variant, intron_variant&NMD_transcript_variant, upstream_gene_variant, intron_variant&non_coding_transcript_variant
rs147134923	2	234368935	G	A	0.0110353	0.360487	0.0234911	235.49	52.4218	3.78617e-53	15.3457	TBIL	DGKD	synonymous_variant, 3_prime_UTR_variant&NMD_transcript_variant, downstream_gene_variant, upstream_gene_variant
rs1500481	2	234702459	C	T	0.454654	-0.0527296	0.00495718	113.146	25.6981	2.00401e-26	-10.637	TBIL	MROH2A	missense_variant, upstream_gene_variant, non_coding_transcript_exon_variant
rs17400325	2	178565913	T	C	0.040265	0.0677985	0.0124096	29.8485	7.33053	4.67165e-08	5.46339	IGF1	PDE11A, AC012499.1	missense_variant, non_coding_transcript_exon_variant, intron_variant&non_coding_transcript_variant
rs17862888	2	234698126	C	G	0.012958	-0.166316	0.0216198	59.1781	13.8416	1.44012e-14	-7.69276	TBIL	MROH2A	splice_polypyrimidine_tract_variant&intron_variant, intron_variant&non_coding_transcript_variant
rs191949663	2	234708393	A	C	0.0103313	-0.181325	0.0242455	55.9306	13.1245	7.50758e-14	-7.47871	TBIL	MROH2A	intron_variant, intron_variant&non_coding_transcript_variant
rs2060824	2	61484556	C	T	0.479734	-0.0285815	0.0051362	30.966	7.58073	2.62585e-08	-5.56472	CAL	USP34	intron_variant, upstream_gene_variant, intron_variant&non_coding_transcript_variant
rs2232329	2	169764616	G	A	0.014349	0.132893	0.0214545	38.3677	9.23215	5.85936e-10	6.19418	GLUC	G6PC2, SPC25	3_prime_UTR_variant&NMD_transcript_variant, 3_prime_UTR_variant, downstream_gene_variant, intron_variant, non_coding_transcript_exon_variant, intron_variant&non_coding_transcript_variant
rs2302154	2	234763137	T	C	0.0617476	0.0653173	0.0101941	41.0545	9.82961	1.48044e-10	6.40736	TBIL	HJURP	missense_variant, missense_variant&NMD_transcript_variant, upstream_gene_variant
rs2304773	2	234235820	C	T	0.0997833	0.0934313	0.00817772	130.533	29.504	3.13329e-30	11.4251	TBIL	SAG	synonymous_variant, non_coding_transcript_exon_variant, 3_prime_UTR_variant&NMD_transcript_variant, downstream_gene_variant, upstream_gene_variant
rs34082659	2	234676409	C	T	0.0149823	0.235661	0.020294	134.847	30.4478	3.56615e-31	11.6123	TBIL	UGT1A6, UGT1A1, UGT1A10, UGT1A9, UGT1A8, UGT1A4, UGT1A5, UGT1A7, UGT1A3	intron_variant, intron_variant&NMD_transcript_variant, downstream_gene_variant
rs3755322	2	234621787	C	G	0.0840374	-0.0993027	0.00889866	124.53	28.1904	6.4506e-29	-11.1593	TBIL	UGT1A6, UGT1A10, UGT1A9, UGT1A5, UGT1A7, UGT1A8, AC114812.8	intron_variant, missense_variant, upstream_gene_variant, intron_variant&NMD_transcript_variant, intron_variant&non_coding_transcript_variant
rs4148776	2	169870882	A	G	0.0546376	-0.071087	0.0107856	43.4401	10.3594	4.37119e-11	-6.59092	ALP	ABCB11	intron_variant
rs4853574	2	192160839	T	A	0.416005	0.0294819	0.00480791	37.6008	9.06144	8.6808e-10	6.13196	GGT	MYO1B	splice_region_variant&synonymous_variant, splice_region_variant&non_coding_transcript_exon_variant
rs492594	2	169764176	G	C	0.4509	0.0269821	0.0048968	30.3618	7.44548	3.58525e-08	5.51015	HBA1C	G6PC2, SPC25	3_prime_UTR_variant&NMD_transcript_variant, missense_variant, 3_prime_UTR_variant, intron_variant, non_coding_transcript_exon_variant, intron_variant&non_coding_transcript_variant
rs492594	2	169764176	G	C	0.4509	0.0473664	0.00512559	85.3991	19.6129	2.43837e-20	9.24116	GLUC	G6PC2, SPC25	3_prime_UTR_variant&NMD_transcript_variant, missense_variant, 3_prime_UTR_variant, intron_variant, non_coding_transcript_exon_variant, intron_variant&non_coding_transcript_variant
rs534310	2	169719873	C	T	0.167177	0.0635509	0.00681547	86.9463	19.9527	1.11506e-20	9.32451	GLUC	NOSTRIN, SPC25	intron_variant, downstream_gene_variant, intron_variant&non_coding_transcript_variant
rs6414069	2	165578581	G	A	0.404783	-0.026363	0.00477301	30.5074	7.47808	3.32598e-08	-5.52335	SHBG	COBLL1	splice_donor_region_variant&intron_variant, intron_variant&non_coding_transcript_variant, downstream_gene_variant, splice_donor_region_variant&intron_variant&NMD_transcript_variant, non_coding_transcript_exon_variant, splice_donor_region_variant&intron_variant&non_coding_transcript_variant
rs6414069	2	165578581	G	A	0.404783	0.0320505	0.00508189	39.7757	9.54536	2.84866e-10	6.30681	TRIG	COBLL1	splice_donor_region_variant&intron_variant, intron_variant&non_coding_transcript_variant, downstream_gene_variant, splice_donor_region_variant&intron_variant&NMD_transcript_variant, non_coding_transcript_exon_variant, splice_donor_region_variant&intron_variant&non_coding_transcript_variant
rs6431631	2	234688036	A	C	0.20848	-0.169239	0.0060939	771.278	169.023	9.48418e-170	-27.7719	TBIL	MROH2A	missense_variant, intron_variant, upstream_gene_variant
rs6708995	2	234890391	G	T	0.483907	-0.0339042	0.00492393	47.4114	11.24	5.7544e-12	-6.8856	TBIL	TRPM8	intron_variant, upstream_gene_variant, intron_variant&NMD_transcript_variant, intron_variant&non_coding_transcript_variant
rs6757461	2	175300997	G	A	0.321909	0.0455137	0.00521077	76.2923	17.6115	2.44625e-18	8.73454	HBA1C	GPR155	synonymous_variant, downstream_gene_variant
rs693	2	21232195	A	G	0.479208	-0.0815684	0.004977	268.601	59.6403	2.28929e-60	-16.3891	LDL	APOB	synonymous_variant
rs693	2	21232195	A	G	0.479208	0.0304745	0.00468455	42.3192	10.1105	7.75354e-11	6.50532	APOA	APOB	synonymous_variant
rs693	2	21232195	A	G	0.479208	-0.10353	0.00485746	454.266	100.07	8.51138e-101	-21.3136	APOB	APOB	synonymous_variant
rs693	2	21232195	A	G	0.479208	-0.066956	0.00501623	178.165	39.914	1.21899e-40	-13.3479	CHO	APOB	synonymous_variant
rs693	2	21232195	A	G	0.479208	-0.0316072	0.00498046	40.2749	9.65634	2.20628e-10	-6.34624	TRIG	APOB	synonymous_variant
rs72970220	2	234727287	A	G	0.0133472	-0.192713	0.0214039	81.0654	18.6608	2.18374e-19	-9.00364	TBIL	MROH2A	splice_polypyrimidine_tract_variant&intron_variant
rs74356516	2	234229480	C	T	0.0669763	-0.156157	0.00983627	252.034	56.029	9.35406e-57	-15.8756	TBIL	SAG	intron_variant, intron_variant&non_coding_transcript_variant, downstream_gene_variant, intron_variant&NMD_transcript_variant
rs7574296	2	234638249	A	G	0.434831	0.551265	0.00497265	12289.8	2670.84	0	110.859	TBIL	UGT1A6, UGT1A10, UGT1A9, UGT1A4, UGT1A5, UGT1A7, UGT1A8, UGT1A3	intron_variant, intron_variant&NMD_transcript_variant, non_coding_transcript_exon_variant, intron_variant&non_coding_transcript_variant, synonymous_variant
rs759173	2	234704690	C	T	0.161846	-0.0502026	0.00670626	56.039	13.1485	7.10395e-14	-7.48593	TBIL	MROH2A	splice_region_variant&synonymous_variant, upstream_gene_variant, downstream_gene_variant
rs7598901	2	73675844	T	C	0.373737	-0.029815	0.00430762	47.9066	11.3497	4.46992e-12	-6.92146	CREA	ALMS1	synonymous_variant, upstream_gene_variant
rs7599598	2	97351840	A	G	0.427587	-0.0386016	0.00522136	54.6567	12.843	1.43549e-13	-7.39302	CAL	FER1L5	non_coding_transcript_exon_variant
rs7605661	2	43625078	T	C	0.377311	-0.0295792	0.00514139	33.0988	8.05753	8.75931e-09	-5.75315	DBP	THADA	intron_variant, intron_variant&NMD_transcript_variant, intron_variant&non_coding_transcript_variant
rs7607980	2	165551201	T	C	0.119946	0.046633	0.00712101	42.8848	10.2361	5.80631e-11	6.54865	HDL	COBLL1	missense_variant, non_coding_transcript_exon_variant, upstream_gene_variant
rs7607980	2	165551201	T	C	0.119946	-0.0540941	0.00764823	50.0239	11.8185	1.5188e-12	-7.07276	TRIG	COBLL1	missense_variant, non_coding_transcript_exon_variant, upstream_gene_variant
rs76372731	2	169747216	T	C	0.0210079	-0.120657	0.0178101	45.8951	10.9039	1.24767e-11	-6.77464	GLUC	SPC25	upstream_gene_variant, intron_variant, intron_variant&non_coding_transcript_variant
rs79063407	2	234224738	G	A	0.0144244	-0.188108	0.0205505	83.7863	19.2587	5.51188e-20	-9.15345	TBIL	SAG	synonymous_variant, non_coding_transcript_exon_variant, upstream_gene_variant, intron_variant&NMD_transcript_variant, intron_variant&non_coding_transcript_variant
rs853772	2	169814655	T	G	0.475122	-0.0709175	0.00487567	211.562	47.2029	6.26758e-48	-14.5452	HBA1C	ABCB11	splice_polypyrimidine_tract_variant&intron_variant, splice_polypyrimidine_tract_variant&intron_variant&NMD_transcript_variant
rs853772	2	169814655	T	G	0.475122	-0.0911749	0.00510347	319.168	70.6578	2.19887e-71	-17.8653	GLUC	ABCB11	splice_polypyrimidine_tract_variant&intron_variant, splice_polypyrimidine_tract_variant&intron_variant&NMD_transcript_variant
rs10935453	3	141747640	G	T	0.328537	-0.0286705	0.00440809	42.303	10.1069	7.81808e-11	-6.50406	CREA	TFDP2	intron_variant, intron_variant&non_coding_transcript_variant, upstream_gene_variant, intron_variant&NMD_transcript_variant
rs10935453	3	141747640	G	T	0.328537	-0.0260038	0.00457336	32.3299	7.88573	1.30098e-08	-5.68593	URT	TFDP2	intron_variant, intron_variant&non_coding_transcript_variant, upstream_gene_variant, intron_variant&NMD_transcript_variant
rs11714515	3	58410431	A	G	0.468918	0.0392152	0.00496754	62.32	14.5347	2.91944e-15	7.89429	AST	PDHB, PXK, RP11-802O23.3	downstream_gene_variant, intron_variant, intron_variant&NMD_transcript_variant, upstream_gene_variant
rs12638263	3	185795855	A	C	0.191054	-0.038899	0.00654348	35.3395	8.55759	2.76956e-09	-5.9447	BMI	ETV5, ETV5-AS1	intron_variant, downstream_gene_variant, upstream_gene_variant, intron_variant&non_coding_transcript_variant, non_coding_transcript_exon_variant
rs17589	3	122056432	T	C	0.425564	0.0391916	0.00520161	56.7689	13.3097	4.90117e-14	7.53451	CAL	CSTA	synonymous_variant
rs17848019	3	172224771	A	T	0.332541	0.0303903	0.00517172	34.5302	8.37708	4.19682e-09	5.87625	IGF1	TNFSF10	intron_variant, downstream_gene_variant
rs180794292	3	122254414	T	C	0.0116854	-0.132548	0.0239688	30.5813	7.49463	3.20162e-08	-5.53002	CAL	PARP9	intron_variant, 3_prime_UTR_variant, intron_variant&non_coding_transcript_variant
rs2302507	3	37144535	C	A	0.49107	-0.0276419	0.00476391	33.6673	8.18449	6.53898e-09	-5.80236	GGT	LRRFIP2	intron_variant, intron_variant&non_coding_transcript_variant
rs34006803	3	122277268	G	A	0.100267	0.116773	0.00857566	185.416	41.497	3.1842e-42	13.6168	CAL	PARP9	missense_variant, intron_variant
rs34345884	3	49760431	G	C	0.0215566	0.108206	0.0168522	41.2276	9.86808	1.35494e-10	6.42088	HBA1C	GMPPB, AMIGO3, IP6K1, RNF123	missense_variant, upstream_gene_variant, downstream_gene_variant, non_coding_transcript_exon_variant, 5_prime_UTR_variant
rs34801630	3	46007846	C	T	0.0124976	0.131184	0.0223207	34.5422	8.37975	4.17109e-09	5.87724	AST	FYCO1	missense_variant
rs4387990	3	58516383	G	A	0.468152	0.0334156	0.00496103	45.3685	10.7872	1.6323e-11	6.73562	AST	ACOX2	intron_variant, upstream_gene_variant, downstream_gene_variant, intron_variant&NMD_transcript_variant
rs4917	3	186337713	C	T	0.35769	-0.0367951	0.00537277	46.9011	11.1269	7.46621e-12	-6.84844	CAL	AHSG	missense_variant, downstream_gene_variant
rs5400	3	170732300	G	A	0.125902	-0.0508353	0.00734369	47.9183	11.3523	4.44324e-12	-6.92231	HBA1C	SLC2A2	missense_variant, intron_variant, intron_variant&NMD_transcript_variant, missense_variant&NMD_transcript_variant
rs5400	3	170732300	G	A	0.125902	0.0678877	0.00715981	89.904	20.6021	2.49977e-21	9.48177	GGT	SLC2A2	missense_variant, intron_variant, intron_variant&NMD_transcript_variant, missense_variant&NMD_transcript_variant
rs5400	3	170732300	G	A	0.125902	-0.0675822	0.00767532	77.5303	17.8837	1.30707e-18	-8.80513	GLUC	SLC2A2	missense_variant, intron_variant, intron_variant&NMD_transcript_variant, missense_variant&NMD_transcript_variant
rs6806529	3	123049938	C	A	0.441265	-0.0302004	0.00489925	37.9986	9.14999	7.07962e-10	-6.16429	HBA1C	ADCY5	intron_variant, downstream_gene_variant
rs9845457	3	135914476	A	G	0.401833	0.0417617	0.00477306	76.5531	17.6688	2.14388e-18	8.74946	SHBG	MSL2	5_prime_UTR_variant, upstream_gene_variant, intron_variant
rs9845457	3	135914476	A	G	0.401833	0.0327968	0.00445325	54.2388	12.7507	1.77542e-13	7.36469	TBIL	MSL2	5_prime_UTR_variant, upstream_gene_variant, intron_variant
rs10009145	4	100047929	G	A	0.456577	-0.0321616	0.00493858	42.4103	10.1308	7.39946e-11	-6.51232	ALP	ADH4, RP11-696N14.1	intron_variant, intron_variant&non_coding_transcript_variant, downstream_gene_variant, intron_variant&NMD_transcript_variant
rs10016702	4	10447640	A	G	0.10386	0.0478975	0.00720481	44.1956	10.527	2.97167e-11	6.64799	URT	ZNF518B	missense_variant, downstream_gene_variant
rs11100802	4	144621199	A	G	0.322699	0.0608798	0.0052119	136.444	30.797	1.59588e-31	11.6809	HBA1C	FREM3, RP13-578N3.3	synonymous_variant, upstream_gene_variant
rs114303452	4	3449915	A	G	0.0115498	0.123935	0.0217794	32.3816	7.89729	1.26681e-08	5.69047	SHBG	HGFAC	missense_variant, non_coding_transcript_exon_variant
rs116499739	4	10502787	C	T	0.0107642	-0.217007	0.0213221	103.583	23.6025	2.49747e-24	-10.1776	URT	CLNK	intron_variant
rs116564150	4	89199397	G	A	0.0118951	0.164486	0.0202318	66.0977	15.3674	4.29141e-16	8.13007	URT	PPM1K, RNU6-112P	synonymous_variant, upstream_gene_variant, non_coding_transcript_exon_variant, intron_variant, downstream_gene_variant
rs1229984	4	100239319	C	T	0.0232098	-0.112983	0.0164367	47.2493	11.2041	6.25029e-12	-6.87383	LDL	ADH1B	missense_variant, non_coding_transcript_exon_variant, 3_prime_UTR_variant&NMD_transcript_variant
rs1229984	4	100239319	C	T	0.0232098	-0.0918299	0.0160213	32.853	8.00263	9.93963e-09	-5.73174	APOB	ADH1B	missense_variant, non_coding_transcript_exon_variant, 3_prime_UTR_variant&NMD_transcript_variant
rs1229984	4	100239319	C	T	0.0232098	-0.109387	0.0165791	43.5323	10.3798	4.17061e-11	-6.59789	CHO	ADH1B	missense_variant, non_coding_transcript_exon_variant, 3_prime_UTR_variant&NMD_transcript_variant
rs1229984	4	100239319	C	T	0.0232098	0.108759	0.0161988	45.0784	10.7228	1.89322e-11	6.71402	IGF1	ADH1B	missense_variant, non_coding_transcript_exon_variant, 3_prime_UTR_variant&NMD_transcript_variant
rs148144831	4	9157338	T	G	0.0428577	0.0886271	0.0108126	67.1847	15.6069	2.47229e-16	8.19665	URT	FAM86KP	intron_variant&non_coding_transcript_variant
rs151390	4	103183510	C	T	0.280388	-0.028728	0.00521244	30.3759	7.44865	3.55918e-08	-5.51143	APOA	SLC39A8	3_prime_UTR_variant, intron_variant
rs151390	4	103183510	C	T	0.280388	-0.0295123	0.00516122	32.6967	7.96769	1.07723e-08	-5.71809	HDL	SLC39A8	3_prime_UTR_variant, intron_variant
rs17013285	4	88767008	G	A	0.166574	0.0401829	0.00589923	46.3972	11.0152	9.65606e-12	6.81155	URT	MEPE	missense_variant, non_coding_transcript_exon_variant, downstream_gene_variant
rs1902023	4	69536084	A	C	0.47501	-0.0304387	0.00474564	41.1398	9.84856	1.41723e-10	-6.41403	GGT	UGT2B15	missense_variant
rs2231142	4	89052323	G	T	0.114123	0.176421	0.00691199	651.469	142.97	1.07152e-143	25.5239	URT	ABCG2	missense_variant, downstream_gene_variant
rs2231157	4	89018565	A	G	0.467362	-0.0245696	0.00440157	31.1589	7.62388	2.3775e-08	-5.58201	URT	ABCG2	intron_variant
rs2241474	4	10086015	C	T	0.493299	-0.168707	0.00438667	1479.09	322.864	0	-38.459	URT	WDR1	intron_variant, intron_variant&non_coding_transcript_variant, downstream_gene_variant
rs2699426	4	3478323	T	C	0.420042	0.035138	0.0051367	46.7935	11.1031	7.88678e-12	6.84058	ALB	DOK7	intron_variant, intron_variant&non_coding_transcript_variant, downstream_gene_variant
rs2699426	4	3478323	T	C	0.420042	0.0296665	0.00481995	37.8831	9.12429	7.51121e-10	6.15494	GGT	DOK7	intron_variant, intron_variant&non_coding_transcript_variant, downstream_gene_variant
rs2699426	4	3478323	T	C	0.420042	0.0335363	0.00474103	50.0363	11.8212	1.50938e-12	7.07363	SHBG	DOK7	intron_variant, intron_variant&non_coding_transcript_variant, downstream_gene_variant
rs2868941	4	10509699	C	T	0.281057	-0.0820881	0.00486374	284.852	63.1816	6.58264e-64	-16.8776	URT	CLNK	intron_variant
rs3775327	4	148985720	C	T	0.247185	-0.0376428	0.0056711	44.0585	10.4966	3.18713e-11	-6.63765	ALP	ARHGAP10	intron_variant, intron_variant&non_coding_transcript_variant, upstream_gene_variant, downstream_gene_variant
rs3816873	4	100504664	T	C	0.252711	-0.0309599	0.00566842	29.8314	7.32671	4.71292e-08	-5.46182	ALT	MTTP	missense_variant, downstream_gene_variant
rs55772354	4	74276150	G	A	0.0191102	-0.104927	0.0184939	32.1896	7.85438	1.39836e-08	-5.6736	ALB	ALB	intron_variant, downstream_gene_variant, intron_variant&NMD_transcript_variant, upstream_gene_variant, intron_variant&non_coding_transcript_variant
rs56097748	4	72629669	T	C	0.0518591	0.0883692	0.0116641	57.3986	13.4487	3.55877e-14	7.57617	VITD	GC, RNA5SP163	splice_polypyrimidine_tract_variant&intron_variant, upstream_gene_variant, splice_polypyrimidine_tract_variant&intron_variant&non_coding_transcript_variant, downstream_gene_variant, splice_polypyrimidine_tract_variant&intron_variant&NMD_transcript_variant
rs6846414	4	10586530	T	C	0.126952	-0.0422607	0.00659414	41.0731	9.83375	1.46639e-10	-6.40883	URT	CLNK	intron_variant
rs6850131	4	88226480	A	C	0.479861	-0.027527	0.00493932	31.0587	7.60146	2.50346e-08	-5.57303	ALT	HSD17B13, MIR5705	intron_variant, upstream_gene_variant
rs6850131	4	88226480	A	C	0.479861	-0.0361137	0.00469464	59.1751	13.8409	1.44245e-14	-7.69254	SHBG	HSD17B13, MIR5705	intron_variant, upstream_gene_variant
rs7041	4	72618334	C	A	0.441933	-0.142552	0.00519374	753.33	165.121	7.56833e-166	-27.4469	VITD	GC	missense_variant, intron_variant&non_coding_transcript_variant, non_coding_transcript_exon_variant, 3_prime_UTR_variant&NMD_transcript_variant
rs72657825	4	77290561	G	A	0.443287	0.0415841	0.00417684	99.1196	22.624	2.37684e-23	9.95588	CREA	CCDC158	intron_variant, upstream_gene_variant
rs73225891	4	9922170	C	G	0.0271959	-0.131378	0.0135131	94.5228	21.6157	2.4227e-22	-9.72227	URT	SLC2A9, RP13-560N11.1	missense_variant, upstream_gene_variant, non_coding_transcript_exon_variant
rs73809629	4	10529766	G	C	0.0109576	-0.234559	0.0209657	125.165	28.3295	4.68274e-29	-11.1877	URT	CLNK	intron_variant, downstream_gene_variant
rs75487798	4	10445207	T	C	0.0356311	0.0708625	0.0118036	36.0413	8.71404	1.93179e-09	6.00347	URT	ZNF518B	missense_variant, downstream_gene_variant
rs2738238	5	39377418	G	A	0.484534	-0.0353342	0.00415383	72.3592	16.7462	1.79391e-17	-8.50641	CREA	DAB2, C9	intron_variant, intron_variant&non_coding_transcript_variant, upstream_gene_variant
rs34225933	5	176825069	C	T	0.0343042	-0.0753574	0.0137527	30.0244	7.36993	4.26648e-08	-5.47946	PHOS	F12, SLC34A1, PFN3	downstream_gene_variant, missense_variant, non_coding_transcript_exon_variant
rs34592828	5	75996909	G	A	0.0459039	-0.0774028	0.0120679	41.1383	9.84823	1.41831e-10	-6.41394	ALB	IQGAP2, CTD-2384B11.2	missense_variant, 3_prime_UTR_variant&NMD_transcript_variant, downstream_gene_variant, intron_variant&non_coding_transcript_variant, upstream_gene_variant
rs34592828	5	75996909	G	A	0.0459039	-0.0779822	0.0122634	40.4363	9.69222	2.03133e-10	-6.35894	TPROT	IQGAP2, CTD-2384B11.2	missense_variant, 3_prime_UTR_variant&NMD_transcript_variant, downstream_gene_variant, intron_variant&non_coding_transcript_variant, upstream_gene_variant
rs3805497	5	40746885	A	T	0.244822	-0.0339052	0.00579501	34.2313	8.31038	4.8935e-09	-5.85076	URA	TTC33	intron_variant, intron_variant&non_coding_transcript_variant
rs3828589	5	32713327	T	C	0.393348	-0.0298528	0.00483781	38.0779	9.16765	6.79751e-10	-6.17073	SBP	NPR3	intron_variant, intron_variant&non_coding_transcript_variant
rs470926	5	72364673	G	A	0.465023	0.0339082	0.00506848	44.7561	10.6514	2.23152e-11	6.69001	ALB	FCHO2	intron_variant, intron_variant&non_coding_transcript_variant
rs470926	5	72364673	G	A	0.465023	-0.0421324	0.00496485	72.0148	16.6704	2.13599e-17	-8.48614	AST	FCHO2	intron_variant, intron_variant&non_coding_transcript_variant
rs6180	5	42719239	A	C	0.450888	-0.0315367	0.00490158	41.3963	9.90556	1.24291e-10	-6.43399	IGF1	GHR	missense_variant, 3_prime_UTR_variant&NMD_transcript_variant, downstream_gene_variant
rs7724832	5	156381370	A	G	0.331068	-0.0311642	0.00528664	34.7499	8.42609	3.74895e-09	-5.8949	CHO	TIMD4	intron_variant
rs870992	5	52193237	A	G	0.0779131	0.0653768	0.00885098	54.5587	12.8214	1.50869e-13	7.38639	GGT	ITGA1	intron_variant, upstream_gene_variant
rs888789	5	74988369	A	G	0.458993	0.0386352	0.00496215	60.6215	14.16	6.91831e-15	7.78598	LDL	POC5	intron_variant&non_coding_transcript_variant, intron_variant, downstream_gene_variant
rs888789	5	74988369	A	G	0.458993	0.0328361	0.00483744	46.0756	10.9439	1.13789e-11	6.78791	APOB	POC5	intron_variant&non_coding_transcript_variant, intron_variant, downstream_gene_variant
rs888789	5	74988369	A	G	0.458993	0.0422361	0.0050049	71.216	16.4946	3.20184e-17	8.43895	CHO	POC5	intron_variant&non_coding_transcript_variant, intron_variant, downstream_gene_variant
rs1015149	6	41658889	C	T	0.456658	-0.0236687	0.00417336	32.1644	7.84874	1.41664e-08	-5.67138	CREA	TFEB, AL035588.1	synonymous_variant, upstream_gene_variant, downstream_gene_variant
rs1044498	6	132172368	A	C	0.137938	0.0420386	0.00726929	33.4435	8.13452	7.33635e-09	5.78304	PHOS	ENPP1	missense_variant, non_coding_transcript_exon_variant, missense_variant&NMD_transcript_variant
rs10455097	6	74493432	C	A	0.486301	0.0394064	0.00513404	58.9137	13.7832	1.6474e-14	7.67551	CAL	CD109	missense_variant&splice_region_variant
rs10755578	6	160969738	C	G	0.478505	-0.0269528	0.00466009	33.4518	8.13638	7.305e-09	-5.78375	SHBG	LPA	intron_variant
rs10948059	6	42928461	C	T	0.484061	0.0292041	0.00467561	39.0131	9.37576	4.20959e-10	6.24605	APOA	PEX6, RPL24P4, GNMT	downstream_gene_variant, upstream_gene_variant
rs1334576	6	7211818	G	A	0.42497	0.0249682	0.00435644	32.8481	8.00153	9.96483e-09	5.73133	URT	RREB1	missense_variant, downstream_gene_variant, non_coding_transcript_exon_variant
rs17311358	6	24580036	G	A	0.0419276	-0.10425	0.0123019	71.8137	16.6262	2.36483e-17	-8.4743	ALP	KIAA0319	intron_variant
rs2076308	6	50791640	G	C	0.177711	0.0408381	0.00672487	36.8777	8.9004	1.25777e-09	6.0727	BMI	TFAP2B	intron_variant, downstream_gene_variant
rs2235501	6	24489691	G	C	0.0513359	-0.0911739	0.0110947	67.5325	15.6835	2.07253e-16	-8.21779	ALP	GPLD1	missense_variant, non_coding_transcript_exon_variant
rs3756772	6	116325142	C	T	0.39966	0.0296192	0.00510476	33.6662	8.18425	6.54259e-09	5.80227	CHO	FRK	upstream_gene_variant, missense_variant
rs3798220	6	160961137	T	C	0.0186517	0.125554	0.0183048	47.0471	11.1593	6.92947e-12	6.85908	LDL	LPA	missense_variant
rs3798220	6	160961137	T	C	0.0186517	0.131899	0.0178481	54.6139	12.8336	1.4669e-13	7.39009	APOB	LPA	missense_variant
rs3798220	6	160961137	T	C	0.0186517	0.112807	0.0184585	37.349	9.00536	9.87734e-10	6.11138	CHO	LPA	missense_variant
rs3813687	6	24719978	G	A	0.200229	0.0361517	0.00616834	34.3496	8.33677	4.605e-09	5.86085	ALP	C6orf62	intron_variant, 5_prime_UTR_variant
rs4074420	6	24806752	C	A	0.458528	-0.0272893	0.00495403	30.3437	7.44143	3.61885e-08	-5.50851	ALP	FAM65B	intron_variant
rs4252185	6	161123451	T	C	0.097449	0.058029	0.00833574	48.462	11.4727	3.36744e-12	6.96147	LDL	PLG, RP1-81D8.3	intron_variant&non_coding_transcript_variant, intron_variant, downstream_gene_variant, upstream_gene_variant
rs4252185	6	161123451	T	C	0.097449	0.0566542	0.00812776	48.5873	11.5004	3.15937e-12	6.97046	APOB	PLG, RP1-81D8.3	intron_variant&non_coding_transcript_variant, intron_variant, downstream_gene_variant, upstream_gene_variant
rs4252185	6	161123451	T	C	0.097449	0.0526848	0.00840576	39.284	9.43601	3.66429e-10	6.2677	CHO	PLG, RP1-81D8.3	intron_variant&non_coding_transcript_variant, intron_variant, downstream_gene_variant, upstream_gene_variant
rs552393576	6	50791592	A	G	0.141047	-0.040983	0.00738691	30.7809	7.5393	2.88868e-08	-5.54806	BMI	TFAP2B	intron_variant, downstream_gene_variant
rs55774724	6	33589332	C	T	0.0660659	-0.0910592	0.0101043	81.2141	18.6935	2.02535e-19	-9.01193	PHOS	ITPR3	5_prime_UTR_variant
rs7752408	6	161021873	G	C	0.363379	-0.0305565	0.00513606	35.3955	8.57006	2.69116e-09	-5.9494	LDL	LPA	intron_variant
rs7752408	6	161021873	G	C	0.363379	-0.0313857	0.00500791	39.278	9.43467	3.67561e-10	-6.26723	APOB	LPA	intron_variant
rs7759182	6	33679239	C	A	0.0163297	-0.146182	0.0197251	54.9219	12.9017	1.25401e-13	-7.41096	PHOS	UQCC2	intron_variant
rs9273528	6	32628633	T	C	0.170192	0.0397275	0.00702886	31.9458	7.79987	1.58537e-08	5.65205	APOA	HLA-DQB1, HLA-DQB1-AS1, XXbac-BPG254F23.6	splice_donor_region_variant&intron_variant, intron_variant, downstream_gene_variant, intron_variant&non_coding_transcript_variant, upstream_gene_variant, intron_variant&NMD_transcript_variant
rs9276436	6	32714083	T	C	0.0822907	-0.0841625	0.0110247	58.2779	13.6429	2.27562e-14	-7.63399	TPROT	HLA-DQA2, MIR3135B	missense_variant, downstream_gene_variant
rs9362415	6	87968565	A	G	0.488545	-0.0289726	0.00489387	35.0486	8.49272	3.21573e-09	-5.92018	IGF1	ZNF292	missense_variant, downstream_gene_variant, intron_variant
rs9370867	6	16145325	A	G	0.464291	-0.0310243	0.00497735	38.8516	9.33981	4.57288e-10	-6.2331	LDL	MYLIP, U3, MIR4639	missense_variant, downstream_gene_variant
rs9370867	6	16145325	A	G	0.464291	-0.0280849	0.00485316	33.4885	8.14455	7.16886e-09	-5.78693	APOB	MYLIP, U3, MIR4639	missense_variant, downstream_gene_variant
rs9400239	6	108977663	C	T	0.294865	-0.0483365	0.00537451	80.8858	18.6213	2.39166e-19	-8.99366	IGF1	FOXO3	intron_variant, 5_prime_UTR_variant
rs942379	6	25849620	G	A	0.448662	0.0313128	0.00524901	35.5869	8.61275	2.43921e-09	5.96547	HBA1C	SLC17A3	downstream_gene_variant, synonymous_variant
rs942379	6	25849620	G	A	0.448662	-0.0663501	0.00464664	203.894	45.5299	2.95189e-46	-14.2792	URT	SLC17A3	downstream_gene_variant, synonymous_variant
rs9491699	6	127471533	C	T	0.482361	0.0313008	0.00496928	39.6757	9.52313	2.99826e-10	6.29886	URA	RSPO3	intron_variant, intron_variant&non_coding_transcript_variant
rs10951758	7	44266077	A	G	0.490255	0.0292637	0.00486997	36.1082	8.72894	1.86664e-09	6.00901	HBA1C	CAMK2B	intron_variant, intron_variant&NMD_transcript_variant, upstream_gene_variant, intron_variant&non_coding_transcript_variant
rs10951758	7	44266077	A	G	0.490255	0.0377557	0.0050931	54.9542	12.9088	1.23367e-13	7.41311	GLUC	CAMK2B	intron_variant, intron_variant&NMD_transcript_variant, upstream_gene_variant, intron_variant&non_coding_transcript_variant
rs145188037	7	45954465	G	A	0.0133574	0.144794	0.0212986	46.2166	10.9752	1.05877e-11	6.79829	IGF1	IGFBP3	missense_variant, downstream_gene_variant, non_coding_transcript_exon_variant
rs17546439	7	44100373	C	T	0.055955	0.0682156	0.0105743	41.6161	9.95438	1.11076e-10	6.45107	HBA1C	PGAM2, DBNL, AC017116.11	downstream_gene_variant, splice_region_variant&splice_polypyrimidine_tract_variant&intron_variant&NMD_transcript_variant, upstream_gene_variant, splice_region_variant&splice_polypyrimidine_tract_variant&intron_variant, splice_region_variant&splice_polypyrimidine_tract_variant&intron_variant&non_coding_transcript_variant
rs2268573	7	44190468	T	G	0.484858	0.0309047	0.00490167	39.7522	9.54012	2.88323e-10	6.30493	HBA1C	GCK	upstream_gene_variant, intron_variant, downstream_gene_variant
rs2854746	7	45960645	G	C	0.400242	-0.0481907	0.00498418	93.4844	21.3878	4.09449e-22	-9.66873	IGF1	IGFBP3	missense_variant, intron_variant, upstream_gene_variant
rs62621812	7	127015083	G	A	0.0219893	-0.0992953	0.0167195	35.2702	8.54214	2.86986e-09	-5.93889	ALP	ZNF800	missense_variant, downstream_gene_variant, upstream_gene_variant
rs711309	7	77539744	A	G	0.496902	0.0230084	0.00414324	30.8386	7.55221	2.80408e-08	5.55324	CREA	PHTF2	intron_variant, intron_variant&non_coding_transcript_variant
rs13266634	8	118184783	C	T	0.310942	-0.0479523	0.00527095	82.7639	19.034	9.24698e-20	-9.09747	HBA1C	SLC30A8	missense_variant
rs13266634	8	118184783	C	T	0.310942	-0.0471032	0.00550722	73.1538	16.9211	1.19922e-17	-8.55299	GLUC	SLC30A8	missense_variant
rs150539196	8	81399180	A	G	0.0414952	0.0746022	0.0116957	40.6867	9.74787	1.78702e-10	6.3786	SHBG	ZBTB10, Y_RNA	intron_variant, synonymous_variant, upstream_gene_variant
rs1805100	8	76476396	G	A	0.479958	0.0390062	0.00428665	82.8	19.042	9.07821e-20	9.09946	URT	HNF4G	3_prime_UTR_variant
rs2073618	8	119964052	G	C	0.448123	0.0390296	0.00491814	62.9776	14.6797	2.09074e-15	7.93585	ALP	TNFRSF11B	missense_variant, missense_variant&NMD_transcript_variant
rs2293889	8	116599199	G	T	0.432774	-0.0298559	0.00474118	39.6541	9.51833	3.03159e-10	-6.29715	APOA	TRPS1	intron_variant, downstream_gene_variant
rs2293889	8	116599199	G	T	0.432774	-0.0282713	0.00470187	36.1535	8.73905	1.82369e-09	-6.01278	HDL	TRPS1	intron_variant, downstream_gene_variant
rs268	8	19813529	A	G	0.018496	-0.207468	0.017351	142.972	32.2247	5.96074e-33	-11.9571	APOA	LPL	missense_variant, downstream_gene_variant
rs268	8	19813529	A	G	0.018496	-0.243795	0.0172072	200.739	44.8414	1.44079e-45	-14.1682	HDL	LPL	missense_variant, downstream_gene_variant
rs268	8	19813529	A	G	0.018496	0.23556	0.0184668	162.712	36.5388	2.89201e-37	12.7559	TRIG	LPL	missense_variant, downstream_gene_variant
rs2974339	8	42397529	C	T	0.390893	0.0398064	0.00496683	64.2313	14.9561	1.10637e-15	8.01445	HBA1C	SLC20A2, SMIM19, RP11-503E24.2	upstream_gene_variant, intron_variant, intron_variant&NMD_transcript_variant, intron_variant&non_coding_transcript_variant
rs301	8	19816934	T	C	0.233662	0.0854539	0.00554752	237.283	52.8128	1.53886e-53	15.404	APOA	LPL	intron_variant
rs301	8	19816934	T	C	0.233662	0.116402	0.00550153	447.663	98.6333	2.32648e-99	21.1581	HDL	LPL	intron_variant
rs301	8	19816934	T	C	0.233662	-0.117169	0.00590425	393.818	86.9133	1.22096e-87	-19.8449	TRIG	LPL	intron_variant
rs7823698	8	41577121	C	G	0.0952184	-0.0558055	0.0082915	45.2989	10.7717	1.69161e-11	-6.73045	HBA1C	ANK1	intron_variant
rs1053878	9	136131651	G	A	0.0704633	-0.13689	0.00965388	201.068	44.9132	1.22124e-45	-14.1798	ALP	ABO, RP11-430N14.4	non_coding_transcript_exon_variant, upstream_gene_variant
rs11795137	9	91606522	T	A	0.0526989	-0.0878694	0.0109078	64.8936	15.1021	7.90497e-16	-8.05565	HBA1C	C9orf47, S1PR3	synonymous_variant, 5_prime_UTR_variant, upstream_gene_variant
rs17758315	9	136379890	G	A	0.348713	-0.0486512	0.00517735	88.3023	20.2504	5.61824e-21	-9.39693	ALP	TMEM8C	synonymous_variant, downstream_gene_variant
rs1800978	9	107665978	C	G	0.124186	-0.0791522	0.00711859	123.634	27.9943	1.01321e-28	-11.1191	APOA	ABCA1	intron_variant, 5_prime_UTR_variant
rs1800978	9	107665978	C	G	0.124186	-0.043356	0.0075972	32.568	7.93895	1.15093e-08	-5.70684	CHO	ABCA1	intron_variant, 5_prime_UTR_variant
rs1800978	9	107665978	C	G	0.124186	-0.0672241	0.00704357	91.0887	20.8621	1.37373e-21	-9.54404	HDL	ABCA1	intron_variant, 5_prime_UTR_variant
rs2066714	9	107586753	T	C	0.126608	0.0581586	0.00704482	68.1536	15.8203	1.51252e-16	8.25551	APOA	ABCA1	missense_variant, downstream_gene_variant
rs2066714	9	107586753	T	C	0.126608	0.0498762	0.00697058	51.1975	12.0782	8.35218e-13	7.15524	HDL	ABCA1	missense_variant, downstream_gene_variant
rs2073927	9	136031346	A	G	0.471041	-0.0313373	0.00496124	39.8972	9.57238	2.67683e-10	-6.31642	ALP	GBGT1, RALGDS	downstream_gene_variant, intron_variant, intron_variant&non_coding_transcript_variant, non_coding_transcript_exon_variant
rs2230808	9	107562804	C	T	0.238578	-0.0411312	0.00551126	55.6981	13.0732	8.4489e-14	-7.46312	APOA	ABCA1	missense_variant
rs2230808	9	107562804	C	T	0.238578	-0.0359794	0.00545319	43.5318	10.3797	4.17157e-11	-6.59786	HDL	ABCA1	missense_variant
rs2274159	9	117166246	A	G	0.492722	-0.0462491	0.00492106	88.3263	20.2557	5.55009e-21	-9.3982	ALT	DFNB31	missense_variant
rs2274159	9	117166246	A	G	0.492722	-0.0352564	0.00496283	50.4682	11.9168	1.21116e-12	-7.10409	AST	DFNB31	missense_variant
rs2275545	9	107651526	A	G	0.143071	-0.0867139	0.00672084	166.468	37.3593	4.3722e-38	-12.9022	APOA	ABCA1	intron_variant
rs2275545	9	107651526	A	G	0.143071	-0.0456608	0.0071727	40.5247	9.71188	1.94142e-10	-6.36592	CHO	ABCA1	intron_variant
rs2275545	9	107651526	A	G	0.143071	-0.0738202	0.00665001	123.227	27.9052	1.24394e-28	-11.1008	HDL	ABCA1	intron_variant
rs34755188	9	104433255	C	T	0.0198771	0.117656	0.0176915	44.2282	10.5343	2.92213e-11	6.65043	ALP	GRIN3A	missense_variant
rs4962040	9	136133531	A	G	0.417357	0.132511	0.0049813	707.649	155.188	6.48634e-156	26.6017	ALP	ABO, RP11-430N14.4	splice_polypyrimidine_tract_variant&intron_variant&non_coding_transcript_variant, upstream_gene_variant
rs72732679	9	107618298	G	A	0.0136079	0.112373	0.0202226	30.8782	7.56107	2.74745e-08	5.5568	APOA	ABCA1	intron_variant, synonymous_variant
rs10786156	10	96014622	C	G	0.430323	-0.0298353	0.00479028	38.7917	9.32648	4.71542e-10	-6.2283	SBP	PLCE1	intron_variant
rs10786156	10	96014622	C	G	0.430323	-0.0276615	0.0050585	29.9025	7.34263	4.54329e-08	-5.46832	DBP	PLCE1	intron_variant
rs10821877	10	52603659	C	T	0.18272	-0.0327791	0.00537156	37.2386	8.98079	1.04523e-09	-6.10234	CREA	A1CF	intron_variant, intron_variant&non_coding_transcript_variant
rs10821877	10	52603659	C	T	0.18272	0.0469322	0.00557922	70.7611	16.3945	4.03181e-17	8.41196	URT	A1CF	intron_variant, intron_variant&non_coding_transcript_variant
rs10824579	10	79590685	C	T	0.373185	0.0458293	0.00492773	86.4953	19.8536	1.40088e-20	9.30029	GGT	DLG5	intron_variant, upstream_gene_variant, intron_variant&NMD_transcript_variant, intron_variant&non_coding_transcript_variant
rs12263369	10	94823343	T	C	0.41014	0.0263982	0.00442832	35.5361	8.60143	2.50363e-09	5.96122	TBIL	EXOC6, CYP26C1, RP11-348J12.2	downstream_gene_variant, intron_variant, upstream_gene_variant
rs1801253	10	115805056	C	G	0.263429	-0.0361486	0.00538465	45.068	10.7205	1.90327e-11	-6.71327	SBP	ADRB1	missense_variant
rs1801253	10	115805056	C	G	0.263429	-0.0340511	0.00568615	35.8612	8.67389	2.1189e-09	-5.98843	DBP	ADRB1	missense_variant
rs1801253	10	115805056	C	G	0.263429	-0.0289768	0.00526148	30.3309	7.43858	3.64267e-08	-5.50735	HDL	ADRB1	missense_variant
rs1926739	10	18270422	G	A	0.491206	-0.0841917	0.00496939	287.034	63.6571	2.20242e-64	-16.9421	AST	SLC39A12	intron_variant
rs2229498	10	70856852	A	G	0.17035	-0.0390815	0.0065261	35.8622	8.67411	2.11782e-09	-5.98849	HBA1C	SRGN	missense_variant, intron_variant&non_coding_transcript_variant
rs2255901	10	101639796	A	G	0.472797	0.0307513	0.00493866	38.7712	9.32193	4.76508e-10	6.22665	ALT	DNMBP	synonymous_variant
rs2862954	10	101912064	C	T	0.498754	0.0642634	0.00493728	169.415	38.003	9.93116e-39	13.016	ALT	ERLIN1	downstream_gene_variant, missense_variant
rs2862954	10	101912064	C	T	0.498754	0.0507455	0.00498757	103.518	23.5884	2.57988e-24	10.1744	AST	ERLIN1	downstream_gene_variant, missense_variant
rs34491125	10	64937501	G	C	0.0300769	0.077143	0.0137006	31.7041	7.74583	1.79544e-08	5.63063	SHBG	JMJD1C	missense_variant, 3_prime_UTR_variant, upstream_gene_variant
rs3812691	10	71078016	T	C	0.246652	0.0410701	0.00567881	52.3043	12.323	4.75335e-13	7.23217	HBA1C	HK1	intron_variant, upstream_gene_variant, intron_variant&non_coding_transcript_variant
rs3824627	10	113908060	C	T	0.389634	0.0262803	0.00479853	29.9946	7.36326	4.33251e-08	5.47674	APOA	GPAM	downstream_gene_variant
rs3824627	10	113908060	C	T	0.389634	0.0271097	0.00475211	32.5445	7.9337	1.16493e-08	5.70477	HDL	GPAM	downstream_gene_variant
rs4379723	10	64963449	T	C	0.472018	0.0920984	0.00492083	350.289	77.4358	3.66606e-78	18.716	ALP	JMJD1C	intron_variant
rs4379723	10	64963449	T	C	0.472018	0.0987081	0.00468047	444.762	98.0019	9.95635e-99	21.0894	SHBG	JMJD1C	intron_variant
rs4379723	10	64963449	T	C	0.472018	-0.0382862	0.00436104	77.0732	17.7832	1.6474e-18	-8.77914	TBIL	JMJD1C	intron_variant
rs4379723	10	64963449	T	C	0.472018	-0.0279129	0.00497154	31.523	7.70532	1.97097e-08	-5.61454	TRIG	JMJD1C	intron_variant
rs5030909	10	70884013	G	A	0.256114	0.033265	0.00560089	35.2745	8.54308	2.86365e-09	5.93923	HBA1C	VPS26A	5_prime_UTR_variant, non_coding_transcript_exon_variant, 5_prime_UTR_variant&NMD_transcript_variant
rs61743874	10	70696818	C	T	0.0454822	-0.0649169	0.0117217	30.6712	7.51475	3.05668e-08	-5.53818	HBA1C	DDX50	synonymous_variant, downstream_gene_variant, non_coding_transcript_exon_variant
rs7100474	10	60273121	T	C	0.45477	-0.0250072	0.004325	33.4316	8.13186	7.38142e-09	-5.78201	URT	BICC1	intron_variant
rs749105	10	71144702	A	G	0.306545	-0.0299389	0.00531044	31.7841	7.76373	1.72294e-08	-5.63774	HBA1C	HK1	intron_variant, intron_variant&non_coding_transcript_variant
rs7912524	10	71098295	A	T	0.487596	0.0927238	0.0048928	359.143	79.3638	4.32713e-80	18.9511	HBA1C	HK1	intron_variant, intron_variant&non_coding_transcript_variant, non_coding_transcript_exon_variant
rs906220	10	71060610	G	A	0.0750122	-0.124052	0.00926682	179.202	40.1404	7.23769e-41	-13.3867	HBA1C	HK1, RP11-227H15.7	missense_variant, intron_variant, upstream_gene_variant, intron_variant&non_coding_transcript_variant, downstream_gene_variant, non_coding_transcript_exon_variant
rs1044482	11	71155171	T	C	0.218296	-0.0957488	0.00621657	237.228	52.8008	1.58198e-53	-15.4022	VITD	DHCR7, RP11-660L16.2	synonymous_variant, splice_region_variant&splice_polypyrimidine_tract_variant&intron_variant, upstream_gene_variant
rs11231825	11	64360274	C	T	0.287298	0.0520671	0.00477189	119.054	26.9918	1.01906e-27	10.9112	URT	SLC22A12	synonymous_variant, 5_prime_UTR_variant
rs11601507	11	5701074	C	A	0.0670499	0.0814595	0.00985857	68.2741	15.8469	1.42266e-16	8.26281	ALP	TRIM5	missense_variant, downstream_gene_variant, missense_variant&NMD_transcript_variant, upstream_gene_variant, non_coding_transcript_exon_variant
rs11820589	11	116633862	G	A	0.0642281	0.0745316	0.0100975	54.4818	12.8044	1.56892e-13	7.38119	LDL	BUD13	missense_variant, upstream_gene_variant
rs11820589	11	116633862	G	A	0.0642281	0.0897541	0.00984854	83.0549	19.098	7.97995e-20	9.11344	APOB	BUD13	missense_variant, upstream_gene_variant
rs11820589	11	116633862	G	A	0.0642281	0.076047	0.0101828	55.7742	13.09	8.12831e-14	7.46818	CHO	BUD13	missense_variant, upstream_gene_variant
rs11820589	11	116633862	G	A	0.0642281	-0.0989844	0.00944952	109.727	24.949	1.1246e-25	-10.4751	HDL	BUD13	missense_variant, upstream_gene_variant
rs11820589	11	116633862	G	A	0.0642281	0.222408	0.0101661	478.623	105.371	4.25598e-106	21.8774	TRIG	BUD13	missense_variant, upstream_gene_variant
rs174528	11	61543499	T	C	0.381189	-0.0317006	0.00509351	38.7347	9.31382	4.8549e-10	-6.22372	LDL	MYRF, TMEM258	intron_variant, upstream_gene_variant, intron_variant&non_coding_transcript_variant
rs174528	11	61543499	T	C	0.381189	0.0515368	0.00505759	103.836	23.658	2.19786e-24	10.19	ALP	MYRF, TMEM258	intron_variant, upstream_gene_variant, intron_variant&non_coding_transcript_variant
rs174528	11	61543499	T	C	0.381189	-0.0504305	0.00496791	103.048	23.4853	3.27115e-24	-10.1513	APOB	MYRF, TMEM258	intron_variant, upstream_gene_variant, intron_variant&non_coding_transcript_variant
rs174528	11	61543499	T	C	0.381189	-0.041229	0.0051365	64.4275	14.9993	1.00161e-15	-8.02667	CHO	MYRF, TMEM258	intron_variant, upstream_gene_variant, intron_variant&non_coding_transcript_variant
rs174528	11	61543499	T	C	0.381189	-0.0400711	0.00476663	70.6706	16.3746	4.22085e-17	-8.40659	HDL	MYRF, TMEM258	intron_variant, upstream_gene_variant, intron_variant&non_coding_transcript_variant
rs174528	11	61543499	T	C	0.381189	0.0349484	0.00528517	43.7256	10.4227	3.77833e-11	6.61254	TPROT	MYRF, TMEM258	intron_variant, upstream_gene_variant, intron_variant&non_coding_transcript_variant
rs174528	11	61543499	T	C	0.381189	0.043656	0.00512809	72.4732	16.7713	1.69317e-17	8.51311	TRIG	MYRF, TMEM258	intron_variant, upstream_gene_variant, intron_variant&non_coding_transcript_variant
rs186808413	11	117042408	C	T	0.0113082	0.205981	0.0221942	86.1341	19.7743	1.68151e-20	9.28085	APOA	PAFAH1B2	downstream_gene_variant, intron_variant, intron_variant&non_coding_transcript_variant, missense_variant
rs186808413	11	117042408	C	T	0.0113082	0.211647	0.0219789	92.7288	21.222	5.99791e-22	9.62955	HDL	PAFAH1B2	downstream_gene_variant, intron_variant, intron_variant&non_coding_transcript_variant, missense_variant
rs186808413	11	117042408	C	T	0.0113082	-0.20775	0.0236456	77.1937	17.8097	1.54989e-18	-8.78599	TRIG	PAFAH1B2	downstream_gene_variant, intron_variant, intron_variant&non_coding_transcript_variant, missense_variant
rs2071313	11	64572602	G	A	0.408291	0.0333169	0.00440621	57.174	13.3991	3.98933e-14	7.56135	URT	MAP4K2, MEN1	upstream_gene_variant, synonymous_variant, intron_variant, downstream_gene_variant, non_coding_transcript_exon_variant
rs2236653	11	126283785	C	T	0.426571	0.0621165	0.00497842	155.679	35.0023	9.94718e-36	12.4772	ALP	ST3GAL4	intron_variant, intron_variant&non_coding_transcript_variant, intron_variant&NMD_transcript_variant
rs2298475	11	126278203	T	C	0.0746947	-0.0894889	0.00934295	91.7425	21.0056	9.87188e-22	-9.57823	ALP	ST3GAL4	splice_region_variant&synonymous_variant, splice_region_variant&non_coding_transcript_exon_variant, splice_region_variant&5_prime_UTR_variant, downstream_gene_variant, splice_region_variant&synonymous_variant&NMD_transcript_variant, upstream_gene_variant
rs2511403	11	93754508	A	G	0.171205	-0.0393446	0.00651042	36.5217	8.8211	1.50973e-09	-6.04333	ALT	HEPHL1	upstream_gene_variant
rs28917234	11	117186506	G	A	0.0336745	0.118584	0.0137896	73.952	17.0967	8.00387e-18	8.59952	TRIG	BACE1, AP000892.4, CEP164	synonymous_variant, downstream_gene_variant, non_coding_transcript_exon_variant, intron_variant
rs3213225	11	2156536	A	G	0.373566	-0.0280745	0.00506846	30.6812	7.51699	3.04096e-08	-5.53906	IGF1	IGF2, INS-IGF2, MIR483	intron_variant, intron_variant&NMD_transcript_variant, upstream_gene_variant
rs3213232	11	2154964	G	A	0.0793069	-0.072417	0.00901527	64.5243	15.0207	9.53455e-16	-8.0327	IGF1	IGF2, INS-IGF2, MIR483, AC132217.4	intron_variant, intron_variant&NMD_transcript_variant, downstream_gene_variant, upstream_gene_variant
rs34481144	11	320836	T	C	0.499201	0.03348	0.00496396	45.4897	10.8141	1.53426e-11	6.74462	ALP	IFITM3, RP11-326C3.11, RP11-326C3.10, RP11-326C3.14, RP11-326C3.13	5_prime_UTR_variant, downstream_gene_variant, intron_variant, upstream_gene_variant, intron_variant&non_coding_transcript_variant
rs360157	11	9754221	T	C	0.433104	-0.0278025	0.00506694	30.1076	7.38856	4.08733e-08	-5.48704	DBP	SWAP70	synonymous_variant, non_coding_transcript_exon_variant, downstream_gene_variant, 3_prime_UTR_variant&NMD_transcript_variant
rs3741211	11	2169110	A	G	0.391159	0.0674859	0.00502183	180.593	40.4441	3.59667e-41	13.4385	IGF1	IGF2, INS-IGF2, IGF2-AS	intron_variant, intron_variant&NMD_transcript_variant, non_coding_transcript_exon_variant, downstream_gene_variant, intron_variant&non_coding_transcript_variant
rs3816605	11	47857253	T	C	0.456498	0.0259862	0.00476515	29.7394	7.3061	4.94197e-08	5.45339	SBP	NUP160	missense_variant, downstream_gene_variant, 3_prime_UTR_variant
rs4074905	11	2189185	A	G	0.34011	0.0482889	0.00516383	87.4484	20.0629	8.65167e-21	9.35137	IGF1	TH	intron_variant&NMD_transcript_variant, intron_variant, upstream_gene_variant, intron_variant&non_coding_transcript_variant
rs4084164	11	62201458	G	A	0.392599	0.0343468	0.0048567	50.0138	11.8163	1.52651e-12	7.07204	GGT	AHNAK	intron_variant, intron_variant&non_coding_transcript_variant
rs4244812	11	65480768	A	G	0.4754	0.0239345	0.00431938	30.7046	7.52223	3.00448e-08	5.54119	URT	RNASEH2C, KAT5	downstream_gene_variant, intron_variant, intron_variant&non_coding_transcript_variant, non_coding_transcript_exon_variant, upstream_gene_variant
rs500389	11	117100594	A	G	0.391412	0.0445752	0.00482243	85.439	19.6217	2.38946e-20	9.24331	APOA	RNF214, PCSK7	upstream_gene_variant, intron_variant, 5_prime_UTR_variant
rs500389	11	117100594	A	G	0.391412	0.0351163	0.00513778	46.716	11.0859	8.2054e-12	6.83492	TRIG	RNF214, PCSK7	upstream_gene_variant, intron_variant, 5_prime_UTR_variant
rs5093	11	116693354	G	A	0.0190579	0.110218	0.0171109	41.4913	9.92666	1.18397e-10	6.44139	APOA	APOA4	intron_variant
rs539858	11	116729013	T	C	0.0485931	0.102536	0.010889	88.6707	20.3313	4.66337e-21	9.41648	APOA	SIK3, APOA1-AS	synonymous_variant, 3_prime_UTR_variant&NMD_transcript_variant, downstream_gene_variant, non_coding_transcript_exon_variant
rs61905530	11	117077716	G	A	0.0310083	0.105192	0.0134877	60.8262	14.2052	6.23448e-15	7.79911	APOA	TAGLN, PCSK7	downstream_gene_variant, intron_variant, intron_variant&non_coding_transcript_variant
rs61905530	11	117077716	G	A	0.0310083	0.0806044	0.0133569	36.4173	8.79783	1.59283e-09	6.03466	HDL	TAGLN, PCSK7	downstream_gene_variant, intron_variant, intron_variant&non_coding_transcript_variant
rs678837	11	117109270	T	G	0.437661	-0.0297004	0.00473784	39.2974	9.43898	3.63932e-10	-6.26876	APOA	RNF214	intron_variant, intron_variant&non_coding_transcript_variant
rs71456318	11	64332862	C	A	0.452655	0.0545101	0.00436113	156.227	35.122	7.55092e-36	12.4991	URT	SLC22A11	intron_variant, upstream_gene_variant, non_coding_transcript_exon_variant, downstream_gene_variant
rs72636977	11	290891	T	C	0.0516838	0.0752995	0.011116	45.8867	10.9021	1.25285e-11	6.77397	ALP	ATHL1, RP11-326C3.2	upstream_gene_variant, synonymous_variant, non_coding_transcript_exon_variant, intron_variant&NMD_transcript_variant, downstream_gene_variant
rs7481951	11	22271870	T	A	0.413656	-0.0308327	0.00503787	37.4567	9.02936	9.34631e-10	-6.12019	AST	ANO5	missense_variant
rs76836072	11	116653762	C	T	0.0544285	0.0697857	0.0103239	45.6927	10.8591	1.38325e-11	6.75963	APOA	ZNF259	splice_polypyrimidine_tract_variant&intron_variant, downstream_gene_variant, splice_polypyrimidine_tract_variant&intron_variant&NMD_transcript_variant
rs76836072	11	116653762	C	T	0.0544285	0.0807737	0.0102237	62.4197	14.5567	2.77524e-15	7.90063	HDL	ZNF259	splice_polypyrimidine_tract_variant&intron_variant, downstream_gene_variant, splice_polypyrimidine_tract_variant&intron_variant&NMD_transcript_variant
rs76836072	11	116653762	C	T	0.0544285	-0.0777253	0.010999	49.9367	11.7992	1.58782e-12	-7.06658	TRIG	ZNF259	splice_polypyrimidine_tract_variant&intron_variant, downstream_gene_variant, splice_polypyrimidine_tract_variant&intron_variant&NMD_transcript_variant
rs77231260	11	64540800	T	C	0.0437897	-0.0636423	0.0105752	36.2174	8.75328	1.7649e-09	-6.01807	URT	SF1	intron_variant, intron_variant&NMD_transcript_variant, downstream_gene_variant, non_coding_transcript_exon_variant, upstream_gene_variant
rs918144	11	116633825	C	T	0.470127	0.03166	0.00470504	45.2788	10.7673	1.70883e-11	6.72895	APOA	BUD13	synonymous_variant, upstream_gene_variant
rs10778520	12	107364873	C	T	0.415441	0.0323904	0.00507025	40.8105	9.7754	1.67726e-10	6.38832	PHOS	C12orf23	splice_polypyrimidine_tract_variant&intron_variant, upstream_gene_variant
rs1169289	12	121416622	C	G	0.439238	0.0459172	0.00495615	85.8342	19.7085	1.95659e-20	9.26469	ALP	HNF1A, HNF1A-AS1	synonymous_variant, intron_variant&non_coding_transcript_variant, intron_variant, synonymous_variant&NMD_transcript_variant
rs1169289	12	121416622	C	G	0.439238	-0.124958	0.00506175	609.437	133.829	1.48252e-134	-24.6867	CRP	HNF1A, HNF1A-AS1	synonymous_variant, intron_variant&non_coding_transcript_variant, intron_variant, synonymous_variant&NMD_transcript_variant
rs1169289	12	121416622	C	G	0.439238	-0.103894	0.00480414	467.677	102.989	1.02565e-103	-21.6259	GGT	HNF1A, HNF1A-AS1	synonymous_variant, intron_variant&non_coding_transcript_variant, intron_variant, synonymous_variant&NMD_transcript_variant
rs1169289	12	121416622	C	G	0.439238	-0.0264234	0.00471017	31.4706	7.69362	2.02479e-08	-5.60986	SHBG	HNF1A, HNF1A-AS1	synonymous_variant, intron_variant&non_coding_transcript_variant, intron_variant, synonymous_variant&NMD_transcript_variant
rs140372512	12	121176902	G	A	0.0134059	-0.142243	0.0218556	42.3582	10.1192	7.59976e-11	-6.50831	CRP	ACADS, RP11-173P15.7	intron_variant, downstream_gene_variant
rs1635553	12	48375568	A	G	0.479296	0.0320365	0.00489707	42.7974	10.2167	6.07156e-11	6.54197	HBA1C	COL2A1	synonymous_variant, non_coding_transcript_exon_variant, upstream_gene_variant
rs16923154	12	20885931	A	G	0.0783099	0.0472991	0.00812502	33.8889	8.23394	5.83526e-09	5.82141	TBIL	SLCO1C1	synonymous_variant, 3_prime_UTR_variant&NMD_transcript_variant
rs17884869	12	123519112	G	A	0.0247387	-0.0943232	0.016501	32.6749	7.96283	1.08936e-08	-5.71621	CAL	PITPNM2	missense_variant, non_coding_transcript_exon_variant
rs2258227	12	121454257	A	T	0.188214	0.0618094	0.00643099	92.3747	21.1443	7.17299e-22	9.61118	CRP	OASL, C12orf43	downstream_gene_variant, synonymous_variant, 5_prime_UTR_variant, non_coding_transcript_exon_variant, upstream_gene_variant
rs2258227	12	121454257	A	T	0.188214	0.0444845	0.0061037	53.1168	12.5027	3.14268e-13	7.28812	GGT	OASL, C12orf43	downstream_gene_variant, synonymous_variant, 5_prime_UTR_variant, non_coding_transcript_exon_variant, upstream_gene_variant
rs2271266	12	102506044	T	C	0.0129826	0.145703	0.0214968	45.9395	10.9138	1.21955e-11	6.77789	IGF1	NUP37	intron_variant, intron_variant&non_coding_transcript_variant
rs2291075	12	21331625	C	T	0.384008	0.0387552	0.00448486	74.6726	17.2552	5.55648e-18	8.64134	TBIL	SLCO1B1, RP11-125O5.2	synonymous_variant, downstream_gene_variant
rs28360458	12	121622024	G	A	0.105277	0.0517085	0.00823075	39.4679	9.47691	3.33496e-10	6.28236	CRP	P2RX7, RP11-340F14.5	intron_variant&NMD_transcript_variant, intron_variant, intron_variant&non_coding_transcript_variant, upstream_gene_variant
rs28360458	12	121622024	G	A	0.105277	0.0453777	0.00781186	33.7424	8.20125	6.29144e-09	5.80882	GGT	P2RX7, RP11-340F14.5	intron_variant&NMD_transcript_variant, intron_variant, intron_variant&non_coding_transcript_variant, upstream_gene_variant
rs28660993	12	123875394	T	C	0.091177	0.047356	0.00811027	34.0942	8.27977	5.25085e-09	5.83902	APOA	SETD8	intron_variant, intron_variant&NMD_transcript_variant, intron_variant&non_coding_transcript_variant, non_coding_transcript_exon_variant, upstream_gene_variant, downstream_gene_variant
rs3184504	12	111884608	C	T	0.481976	0.054837	0.00504837	117.99	26.7589	1.74221e-27	10.8623	DBP	SH2B3	missense_variant, downstream_gene_variant
rs3184504	12	111884608	C	T	0.481976	-0.0294876	0.00504505	34.1624	8.295	5.06991e-09	-5.84486	CHO	SH2B3	missense_variant, downstream_gene_variant
rs3184504	12	111884608	C	T	0.481976	-0.0285343	0.00467657	37.229	8.97864	1.05041e-09	-6.10154	HDL	SH2B3	missense_variant, downstream_gene_variant
rs3184504	12	111884608	C	T	0.481976	0.0381608	0.00440622	75.007	17.3288	4.69029e-18	8.66067	TBIL	SH2B3	missense_variant, downstream_gene_variant
rs3184504	12	111884608	C	T	0.481976	0.0327496	0.00435042	56.6693	13.2877	5.15585e-14	7.52792	URT	SH2B3	missense_variant, downstream_gene_variant
rs3213570	12	121222411	C	G	0.470187	-0.0385011	0.0050547	58.0171	13.5853	2.59836e-14	-7.61689	CRP	SPPL3	splice_polypyrimidine_tract_variant&intron_variant, splice_polypyrimidine_tract_variant&intron_variant&non_coding_transcript_variant
rs3213570	12	121222411	C	G	0.470187	-0.0337767	0.00479745	49.5695	11.7179	1.9147e-12	-7.04055	GGT	SPPL3	splice_polypyrimidine_tract_variant&intron_variant, splice_polypyrimidine_tract_variant&intron_variant&non_coding_transcript_variant
rs35411407	12	4708908	T	C	0.0245227	0.101075	0.0162571	38.6542	9.29589	5.05953e-10	6.21728	PHOS	DYRK4, RP11-234B24.5	synonymous_variant, downstream_gene_variant, non_coding_transcript_exon_variant
rs55772007	12	102545563	A	G	0.217371	0.0513028	0.00593005	74.8453	17.2932	5.09096e-18	8.65133	IGF1	PARPBP	intron_variant, 3_prime_UTR_variant&NMD_transcript_variant, non_coding_transcript_exon_variant, intron_variant&NMD_transcript_variant, intron_variant&non_coding_transcript_variant, downstream_gene_variant, synonymous_variant
rs56031203	12	21427868	A	G	0.0234539	0.110911	0.0144335	59.0487	13.813	1.53815e-14	7.68428	TBIL	SLCO1A2	intron_variant, downstream_gene_variant, non_coding_transcript_exon_variant, intron_variant&non_coding_transcript_variant, intron_variant&NMD_transcript_variant
rs5888	12	125284748	G	A	0.483487	0.0319835	0.00469719	46.3634	11.0078	9.822e-12	6.80907	APOA	SCARB1	synonymous_variant, non_coding_transcript_exon_variant
rs5888	12	125284748	G	A	0.483487	0.0325651	0.00465182	49.0071	11.5934	2.55035e-12	7.00051	HDL	SCARB1	synonymous_variant, non_coding_transcript_exon_variant
rs61748115	12	120741382	G	A	0.0582433	-0.0594115	0.0107177	30.7284	7.52755	2.96791e-08	-5.54331	CRP	SIRT4	synonymous_variant, splice_polypyrimidine_tract_variant&intron_variant, upstream_gene_variant
rs6487138	12	20905250	T	C	0.447756	0.0499063	0.00437821	129.932	29.3726	4.24033e-30	11.3988	TBIL	SLCO1C1	synonymous_variant, missense_variant, 3_prime_UTR_variant&NMD_transcript_variant
rs7138492	12	125324197	A	G	0.136789	-0.0533679	0.00679802	61.6305	14.3826	4.14381e-15	-7.85051	APOA	SCARB1	intron_variant, intron_variant&non_coding_transcript_variant, 5_prime_UTR_variant
rs7138492	12	125324197	A	G	0.136789	-0.0536857	0.00673235	63.5891	14.8145	1.53285e-15	-7.97429	HDL	SCARB1	intron_variant, intron_variant&non_coding_transcript_variant, 5_prime_UTR_variant
rs735295	12	547683	T	C	0.240514	0.0346507	0.00577536	35.9969	8.70415	1.97629e-09	5.99975	ALP	CCDC77	missense_variant, non_coding_transcript_exon_variant
rs740059	12	4671490	G	A	0.462134	-0.0460076	0.00503146	83.6125	19.2205	6.01866e-20	-9.14399	PHOS	RAD51AP1, DYRK4	downstream_gene_variant, intron_variant&NMD_transcript_variant, upstream_gene_variant, intron_variant
rs4296139	13	95275576	G	C	0.420465	0.0309023	0.00496116	38.7986	9.32803	4.69862e-10	6.22885	ALP	GPR180	intron_variant
rs7332372	13	42465490	T	C	0.143081	-0.0411679	0.00732235	31.6093	7.72464	1.88521e-08	-5.62223	CAL	VWA8	intron_variant
rs9604573	13	114542858	G	A	0.254306	0.0314405	0.0057038	30.3845	7.45056	3.54356e-08	5.5122	LDL	GAS6, GAS6-AS1	intron_variant, upstream_gene_variant, downstream_gene_variant
rs9604573	13	114542858	G	A	0.254306	0.0356329	0.005752	38.3763	9.23407	5.83351e-10	6.19487	CHO	GAS6, GAS6-AS1	intron_variant, upstream_gene_variant, downstream_gene_variant
rs10144543	14	103574714	C	T	0.424506	0.100766	0.00480138	440.449	97.0633	8.64371e-98	20.9869	GGT	EXOC3L4	intron_variant, downstream_gene_variant, intron_variant&NMD_transcript_variant, intron_variant&non_coding_transcript_variant
rs17580	14	94847262	T	A	0.0481632	0.0954019	0.0118205	65.1395	15.1563	6.9775e-16	8.07089	ALB	SERPINA1	missense_variant, missense_variant&NMD_transcript_variant, downstream_gene_variant
rs2234131	14	103596488	A	G	0.384169	0.0274909	0.00488852	31.6245	7.72803	1.87055e-08	5.62356	GGT	TNFAIP2	intron_variant, upstream_gene_variant, downstream_gene_variant, intron_variant&NMD_transcript_variant, intron_variant&non_coding_transcript_variant
rs2277458	14	39583481	G	A	0.174571	0.0431299	0.00672837	41.09	9.83751	1.45375e-10	6.41016	VITD	GEMIN2, SEC23A	upstream_gene_variant, 5_prime_UTR_variant
rs28418471	14	103576292	G	A	0.117464	0.0517633	0.00738025	49.1929	11.6345	2.32006e-12	7.01376	GGT	EXOC3L4	intron_variant, intron_variant&NMD_transcript_variant, intron_variant&non_coding_transcript_variant
rs45505795	14	94756943	G	C	0.033573	0.129918	0.0140678	85.2872	19.5883	2.58048e-20	9.23513	ALB	SERPINA10	5_prime_UTR_variant, synonymous_variant
rs45505795	14	94756943	G	C	0.033573	0.0767201	0.012973	34.9735	8.47595	3.34234e-09	5.91383	SHBG	SERPINA10	5_prime_UTR_variant, synonymous_variant
rs4983387	14	105268228	A	G	0.0982344	0.0433638	0.00781683	30.7746	7.5379	2.89801e-08	5.54749	APOA	ZBTB42	missense_variant
rs4983387	14	105268228	A	G	0.0982344	0.0439812	0.00773996	32.2891	7.87663	1.32853e-08	5.68235	HDL	ZBTB42	missense_variant
rs8017377	14	24883887	G	A	0.472391	-0.0274391	0.00492554	31.0336	7.59586	2.53595e-08	-5.57078	ALP	NYNRIN	missense_variant, non_coding_transcript_exon_variant
rs8017377	14	24883887	G	A	0.472391	-0.0308333	0.00468359	43.3392	10.337	4.60257e-11	-6.58326	SHBG	NYNRIN	missense_variant, non_coding_transcript_exon_variant
rs1145086	15	45654327	A	G	0.368921	0.0579203	0.0043118	180.445	40.4117	3.87525e-41	13.433	CREA	GATM	synonymous_variant, downstream_gene_variant, non_coding_transcript_exon_variant
rs11855248	15	41276158	G	A	0.457763	0.0251869	0.00423113	35.4354	8.57898	2.63645e-09	5.95276	CREA	INO80	intron_variant, upstream_gene_variant, intron_variant&NMD_transcript_variant, non_coding_transcript_exon_variant, downstream_gene_variant
rs150952015	15	60884594	G	T	0.0535456	-0.0643745	0.0105904	36.9489	8.91627	1.21263e-09	-6.07857	GGT	RORA, RP11-219B17.1	intron_variant, missense_variant, intron_variant&NMD_transcript_variant, intron_variant&non_coding_transcript_variant, non_coding_transcript_exon_variant
rs2047866	15	76136194	T	C	0.477002	-0.0305747	0.00413418	54.6948	12.8515	1.40767e-13	-7.39559	CREA	UBE2Q2	splice_region_variant&intron_variant, splice_region_variant&intron_variant&NMD_transcript_variant, upstream_gene_variant
rs2047866	15	76136194	T	C	0.477002	-0.0287737	0.00428881	45.011	10.7079	1.9593e-11	-6.70902	URT	UBE2Q2	splice_region_variant&intron_variant, splice_region_variant&intron_variant&NMD_transcript_variant, upstream_gene_variant
rs2291011	15	74000839	G	A	0.47294	0.028078	0.00476307	34.7504	8.4262	3.748e-09	5.89494	GGT	CD276	intron_variant, non_coding_transcript_exon_variant, intron_variant&NMD_transcript_variant, upstream_gene_variant
rs62020666	15	43026625	T	A	0.100729	-0.0541677	0.00817441	43.9105	10.4638	3.43716e-11	-6.6265	IGF1	TTBK2, CDAN1, CTD-2036P10.3	downstream_gene_variant, intron_variant, upstream_gene_variant
rs6416452	15	53994493	G	A	0.490073	0.0236311	0.00414462	32.5086	7.92567	1.18667e-08	5.70163	CREA	WDR72	synonymous_variant
rs7174918	15	99251356	C	T	0.32239	0.0328092	0.00461097	50.6299	11.9526	1.11532e-12	7.11547	URT	IGF1R	intron_variant, intron_variant&non_coding_transcript_variant
rs7177338	15	91428636	A	G	0.474443	0.0293993	0.00473996	38.4704	9.255	5.55904e-10	6.20244	SBP	FURIN, FES	downstream_gene_variant, splice_region_variant&splice_polypyrimidine_tract_variant&intron_variant, intron_variant, upstream_gene_variant, splice_region_variant&splice_polypyrimidine_tract_variant&intron_variant&NMD_transcript_variant, missense_variant&NMD_transcript_variant, non_coding_transcript_exon_variant
rs11076256	16	58752466	C	T	0.085404	-0.0683288	0.00887038	59.3367	13.8766	1.32862e-14	-7.70303	AST	GOT2	missense_variant, downstream_gene_variant, upstream_gene_variant, non_coding_transcript_exon_variant
rs12708919	16	71986995	G	A	0.465502	0.0314317	0.00497542	39.9095	9.5751	2.66011e-10	6.3174	LDL	PKD1L3	splice_region_variant&intron_variant&non_coding_transcript_variant, splice_region_variant&splice_polypyrimidine_tract_variant&intron_variant&non_coding_transcript_variant
rs12708919	16	71986995	G	A	0.465502	0.0305334	0.00485276	39.5887	9.50377	3.13495e-10	6.29197	APOB	PKD1L3	splice_region_variant&intron_variant&non_coding_transcript_variant, splice_region_variant&splice_polypyrimidine_tract_variant&intron_variant&non_coding_transcript_variant
rs12708919	16	71986995	G	A	0.465502	0.0308814	0.00501635	37.8982	9.12764	7.4535e-10	6.15615	CHO	PKD1L3	splice_region_variant&intron_variant&non_coding_transcript_variant, splice_region_variant&splice_polypyrimidine_tract_variant&intron_variant&non_coding_transcript_variant
rs12922835	16	56403323	G	C	0.0109061	0.136675	0.0226852	36.2991	8.77149	1.69243e-09	6.02485	HDL	AMFR	intron_variant, upstream_gene_variant, intron_variant&non_coding_transcript_variant
rs140227724	16	57080604	G	A	0.0102941	0.138443	0.0232356	35.5004	8.59346	2.55e-09	5.95823	HDL	NLRC5	intron_variant, intron_variant&non_coding_transcript_variant, intron_variant&NMD_transcript_variant, downstream_gene_variant
rs1532625	16	57005301	C	T	0.441072	-0.0484092	0.00501127	93.3171	21.3511	4.45554e-22	-9.66007	LDL	CETP	splice_region_variant&intron_variant, splice_region_variant&intron_variant&non_coding_transcript_variant
rs1532625	16	57005301	C	T	0.441072	0.157978	0.00477021	1096.78	239.78	1.65959e-240	33.1176	APOA	CETP	splice_region_variant&intron_variant, splice_region_variant&intron_variant&non_coding_transcript_variant
rs1532625	16	57005301	C	T	0.441072	-0.0601731	0.00488773	151.562	34.1025	7.89769e-35	-12.3111	APOB	CETP	splice_region_variant&intron_variant, splice_region_variant&intron_variant&non_coding_transcript_variant
rs1532625	16	57005301	C	T	0.441072	0.197553	0.00475454	1726.43	376.607	0	41.5504	HDL	CETP	splice_region_variant&intron_variant, splice_region_variant&intron_variant&non_coding_transcript_variant
rs1672867	16	57071114	G	A	0.016228	-0.128421	0.0186457	47.4369	11.2456	5.68068e-12	-6.88743	APOA	NLRC5	missense_variant, missense_variant&NMD_transcript_variant, upstream_gene_variant, 3_prime_UTR_variant&NMD_transcript_variant
rs1672867	16	57071114	G	A	0.016228	-0.154753	0.0185845	69.3388	16.0813	8.29278e-17	-8.32699	HDL	NLRC5	missense_variant, missense_variant&NMD_transcript_variant, upstream_gene_variant, 3_prime_UTR_variant&NMD_transcript_variant
rs169068	16	1129872	T	C	0.45573	-0.0372114	0.00491845	57.2395	13.4136	3.85834e-14	-7.56568	IGF1	SSTR5, SSTR5-AS1	missense_variant, intron_variant, upstream_gene_variant
rs1800777	16	57017319	G	A	0.0391865	-0.214822	0.012202	309.955	68.651	2.23357e-69	-17.6055	APOA	CETP	missense_variant
rs1800777	16	57017319	G	A	0.0391865	-0.285167	0.0121619	549.787	120.854	1.39959e-121	-23.4476	HDL	CETP	missense_variant
rs1803870	16	56839439	C	T	0.103984	-0.0710608	0.00774609	84.158	19.3403	4.56773e-20	-9.17376	APOA	NUP93	synonymous_variant, intron_variant, intron_variant&non_coding_transcript_variant, non_coding_transcript_exon_variant
rs1803870	16	56839439	C	T	0.103984	-0.089227	0.00772066	133.563	30.1668	6.81083e-31	-11.5569	HDL	NUP93	synonymous_variant, intron_variant, intron_variant&non_coding_transcript_variant, non_coding_transcript_exon_variant
rs1965024	16	51173559	A	G	0.333117	0.0435317	0.00529816	67.509	15.6784	2.09701e-16	8.21638	CRP	SALL1	synonymous_variant, intron_variant, downstream_gene_variant
rs36049418	16	56921840	G	A	0.0249963	0.0912657	0.0151366	36.3548	8.7839	1.64475e-09	6.02947	HDL	SLC12A3	missense_variant
rs41278174	16	16259596	G	A	0.0271482	0.129128	0.0153608	70.6662	16.3736	4.23058e-17	8.40633	PHOS	ABCC6	missense_variant, 3_prime_UTR_variant&NMD_transcript_variant
rs4988483	16	1129010	C	A	0.058806	-0.143436	0.010401	190.182	42.5373	2.90202e-43	-13.7906	IGF1	SSTR5, SSTR5-AS1	missense_variant, upstream_gene_variant
rs544034	16	88909376	C	T	0.196853	0.0394136	0.00663343	35.3033	8.54952	2.8215e-09	5.94166	HBA1C	GALNS	intron_variant, upstream_gene_variant, non_coding_transcript_exon_variant, intron_variant&non_coding_transcript_variant, intron_variant&NMD_transcript_variant
rs7186799	16	57220016	A	C	0.43584	-0.0273151	0.00475028	33.0649	8.04996	8.91333e-09	-5.75021	APOA	FAM192A, RSPRY1	upstream_gene_variant, 5_prime_UTR_variant
rs7186799	16	57220016	A	C	0.43584	-0.0292459	0.00473468	38.1548	9.18477	6.53477e-10	-6.17695	HDL	FAM192A, RSPRY1	upstream_gene_variant, 5_prime_UTR_variant
rs879620	16	4015729	T	C	0.384373	-0.0303319	0.00528224	32.9733	8.0295	9.34329e-09	-5.74224	BMI	ADCY9	3_prime_UTR_variant, intron_variant
rs9783783	16	30078492	C	G	0.499851	-0.0320187	0.0049038	42.6324	10.1801	6.60541e-11	-6.52936	IGF1	ALDOA	intron_variant, downstream_gene_variant, intron_variant&non_coding_transcript_variant, upstream_gene_variant
rs9930761	16	57007192	T	C	0.0630394	0.0786775	0.00975187	65.0917	15.1457	7.1499e-16	8.06794	APOA	CETP	intron_variant, intron_variant&non_coding_transcript_variant
rs9930761	16	57007192	T	C	0.0630394	0.0956	0.00971985	96.7381	22.1016	7.91407e-23	9.83554	HDL	CETP	intron_variant, intron_variant&non_coding_transcript_variant
rs1042522	17	7579472	C	G	0.247766	-0.166182	0.00548286	918.653	201.063	8.64968e-202	-30.3094	SHBG	TP53	missense_variant, upstream_gene_variant, non_coding_transcript_exon_variant, intron_variant
rs111653425	17	19474875	C	T	0.0118084	0.163928	0.0192324	72.6509	16.8104	1.54739e-17	8.52353	CREA	SLC47A1, RP11-1113L8.1	missense_variant, intron_variant, intron_variant&non_coding_transcript_variant, non_coding_transcript_exon_variant, downstream_gene_variant, upstream_gene_variant
rs1136201	17	37879588	A	G	0.249377	0.0319549	0.00480489	44.2291	10.5345	2.92079e-11	6.6505	CREA	ERBB2, MIR4728	missense_variant, 3_prime_UTR_variant&NMD_transcript_variant, non_coding_transcript_exon_variant, upstream_gene_variant, downstream_gene_variant
rs12449858	17	76121318	G	A	0.0861137	-0.0519681	0.00867694	35.8707	8.67601	2.10858e-09	-5.98922	HBA1C	TMC6	missense_variant, 5_prime_UTR_variant, upstream_gene_variant, downstream_gene_variant, non_coding_transcript_exon_variant
rs1292053	17	57963537	A	G	0.436165	0.0290594	0.00517517	31.5299	7.70688	1.9639e-08	5.61516	TPROT	TUBD1, NDUFB8P2	missense_variant, intron_variant, downstream_gene_variant, missense_variant&NMD_transcript_variant, non_coding_transcript_exon_variant
rs142039417	17	61988614	A	T	0.0256926	0.107929	0.0154766	48.632	11.5103	3.08816e-12	6.97369	IGF1	CSHL1	5_prime_UTR_variant, upstream_gene_variant, intron_variant, non_coding_transcript_exon_variant
rs17881850	17	7573057	G	A	0.0104882	0.169203	0.0232653	52.8929	12.4532	3.52209e-13	7.27276	SHBG	TP53	intron_variant, intron_variant&non_coding_transcript_variant, downstream_gene_variant
rs1801689	17	64210580	A	C	0.028851	0.0900601	0.0147979	37.0395	8.93644	1.1576e-09	6.08601	LDL	APOH	missense_variant, downstream_gene_variant, intron_variant
rs1801689	17	64210580	A	C	0.028851	0.0945383	0.0144301	42.9215	10.2443	5.69771e-11	6.55147	APOB	APOH	missense_variant, downstream_gene_variant, intron_variant
rs1801689	17	64210580	A	C	0.028851	0.0942481	0.0145913	41.7214	9.97776	1.05254e-10	6.4592	IGF1	APOH	missense_variant, downstream_gene_variant, intron_variant
rs1801689	17	64210580	A	C	0.028851	-0.088615	0.0141027	39.4829	9.48025	3.30941e-10	-6.28355	SHBG	APOH	missense_variant, downstream_gene_variant, intron_variant
rs193159515	17	7259087	G	A	0.067911	0.0626617	0.0108682	33.2423	8.08959	8.13598e-09	5.7656	ALP	ACAP1, TMEM95, KCTD11, RP11-542C16.1	downstream_gene_variant, intron_variant, upstream_gene_variant
rs2071502	17	7414958	C	G	0.389489	-0.102583	0.00505861	411.235	90.7048	1.97333e-91	-20.2789	SHBG	POLR2A	intron_variant, downstream_gene_variant, intron_variant&non_coding_transcript_variant
rs2072153	17	47390014	G	C	0.312519	0.0398957	0.00514103	60.2217	14.0718	8.47618e-15	7.76025	SHBG	ZNF652	intron_variant, intron_variant&NMD_transcript_variant
rs222837	17	7132556	C	T	0.49736	0.0296191	0.00488819	36.7153	8.86423	1.367e-09	6.05932	ALP	DVL2, ACADVL	synonymous_variant, downstream_gene_variant, upstream_gene_variant, non_coding_transcript_exon_variant
rs2233368	17	47293848	C	T	0.352825	0.046067	0.00496354	86.1381	19.7752	1.67803e-20	9.28108	SHBG	ABI3	intron_variant, upstream_gene_variant
rs2233667	17	47484228	G	C	0.335657	-0.0343121	0.00502446	46.6353	11.068	8.55067e-12	-6.82901	SHBG	PHB, RP11-1079K10.4, RP11-81K2.1	splice_polypyrimidine_tract_variant&intron_variant, downstream_gene_variant, splice_polypyrimidine_tract_variant&intron_variant&non_coding_transcript_variant, intron_variant, non_coding_transcript_exon_variant
rs2292644	17	76394449	T	C	0.394973	-0.0293496	0.00478565	37.6117	9.06386	8.63257e-10	-6.13283	APOA	PGS1, SNORA30	intron_variant, upstream_gene_variant, intron_variant&non_coding_transcript_variant, downstream_gene_variant, intron_variant&NMD_transcript_variant
rs2292644	17	76394449	T	C	0.394973	-0.0322841	0.00474149	46.3604	11.0071	9.83785e-12	-6.80885	HDL	PGS1, SNORA30	intron_variant, upstream_gene_variant, intron_variant&non_coding_transcript_variant, downstream_gene_variant, intron_variant&NMD_transcript_variant
rs2451217	17	80710278	G	C	0.449175	0.0500551	0.00491198	103.844	23.6598	2.18877e-24	10.1904	HBA1C	FN3K, TBCD	downstream_gene_variant, intron_variant
rs2613522	17	76120065	A	G	0.274424	0.0856741	0.0054493	247.182	54.9712	1.06856e-55	15.722	HBA1C	TMC6	splice_donor_5th_base_variant&intron_variant, splice_donor_5th_base_variant&intron_variant&non_coding_transcript_variant, downstream_gene_variant, upstream_gene_variant
rs35619711	17	59482169	G	C	0.26533	0.0387764	0.00470842	67.8243	15.7478	1.78731e-16	8.23554	CREA	TBX2, RP11-332H18.5, RP11-332H18.4	intron_variant, intron_variant&NMD_transcript_variant, non_coding_transcript_exon_variant, upstream_gene_variant, intron_variant&non_coding_transcript_variant
rs35985803	17	7254315	G	A	0.0812165	-0.0722915	0.00866795	69.5571	16.1294	7.42335e-17	-8.34009	SHBG	ACAP1, TMEM95, KCTD11, RP11-542C16.1	missense_variant, upstream_gene_variant, downstream_gene_variant
rs3760370	17	45695832	T	C	0.495206	-0.0329133	0.00474478	48.1184	11.3966	4.01236e-12	-6.93674	SHBG	NPEPPS, RP11-580I16.2	intron_variant, downstream_gene_variant, intron_variant&NMD_transcript_variant, intron_variant&non_coding_transcript_variant
rs4796407	17	7245371	A	G	0.436557	0.0303985	0.00488069	38.7919	9.32653	4.71487e-10	6.22832	SHBG	ACAP1	synonymous_variant, upstream_gene_variant, 5_prime_UTR_variant, non_coding_transcript_exon_variant
rs4968213	17	7474277	T	C	0.0441632	-0.0958647	0.0115071	69.404	16.0957	8.02232e-17	-8.33092	SHBG	EIF4A1, SENP3, SNORA48, SENP3-EIF4A1, SNORA67	upstream_gene_variant, intron_variant, intron_variant&non_coding_transcript_variant, downstream_gene_variant
rs55764662	17	42155742	C	T	0.0363961	-0.0740795	0.0125003	35.1202	8.50868	3.0997e-09	-5.92622	APOA	HDAC5, G6PC3	3_prime_UTR_variant, downstream_gene_variant
rs55764662	17	42155742	C	T	0.0363961	-0.0952852	0.0123849	59.1921	13.8447	1.42988e-14	-7.69366	HDL	HDAC5, G6PC3	3_prime_UTR_variant, downstream_gene_variant
rs55764662	17	42155742	C	T	0.0363961	0.0736948	0.0132847	30.773	7.53753	2.90048e-08	5.54734	TRIG	HDAC5, G6PC3	3_prime_UTR_variant, downstream_gene_variant
rs62061175	17	7321067	T	C	0.488729	-0.0455934	0.00495938	84.5182	19.4194	3.80715e-20	-9.19337	SHBG	NLGN2, SPEM1, RP11-104H15.7	synonymous_variant, upstream_gene_variant, downstream_gene_variant
rs62623385	17	7847837	A	T	0.0336407	-0.195609	0.0130914	223.256	49.7538	1.76279e-50	-14.9418	SHBG	CNTROB	intron_variant, missense_variant, downstream_gene_variant, intron_variant&NMD_transcript_variant, upstream_gene_variant, non_coding_transcript_exon_variant
rs7359662	17	7681412	G	C	0.0556511	-0.0749665	0.010382	52.1402	12.2867	5.16773e-13	-7.22081	SHBG	DNAH2	synonymous_variant, 3_prime_UTR_variant&NMD_transcript_variant
rs871841	17	8216468	T	C	0.498937	0.0275682	0.00490015	31.6518	7.73414	1.84442e-08	5.62599	HBA1C	ARHGEF15, AC135178.7	missense_variant, non_coding_transcript_exon_variant, downstream_gene_variant, upstream_gene_variant, missense_variant&NMD_transcript_variant
rs9899415	17	59164245	T	C	0.170582	-0.0372418	0.00550561	45.7563	10.8732	1.33906e-11	-6.76434	CREA	BCAS3	intron_variant, intron_variant&non_coding_transcript_variant
rs9899415	17	59164245	T	C	0.170582	-0.0534439	0.00662885	65.0011	15.1258	7.48514e-16	-8.06232	PHOS	BCAS3	intron_variant, intron_variant&non_coding_transcript_variant
rs1787299	18	47480660	A	G	0.402784	-0.0269073	0.00477251	31.7867	7.76431	1.72064e-08	-5.63798	APOA	MYO5B	intron_variant
rs2229616	18	58039276	C	T	0.0207775	-0.109192	0.0180334	36.6627	8.8525	1.40443e-09	-6.05499	BMI	MC4R	missense_variant
rs3744867	18	56149048	A	G	0.432693	0.0344398	0.0049546	48.3174	11.4407	3.62493e-12	6.95108	ALT	ALPK2	3_prime_UTR_variant
rs3744867	18	56149048	A	G	0.432693	0.0355479	0.00478424	55.208	12.9649	1.08418e-13	7.43021	GGT	ALPK2	3_prime_UTR_variant
rs41301139	18	43262408	G	A	0.0166752	0.14216	0.0193991	53.7017	12.632	2.33346e-13	7.32818	URA	SLC14A2, RP11-116O18.3	missense_variant, intron_variant&non_coding_transcript_variant
rs41469449	18	47108656	T	G	0.0515184	-0.0625335	0.0106156	34.7009	8.41515	3.84459e-09	-5.89072	APOA	LIPG	intron_variant, downstream_gene_variant
rs41469449	18	47108656	T	G	0.0515184	-0.0588991	0.0105056	31.4323	7.68504	2.06519e-08	-5.60645	HDL	LIPG	intron_variant, downstream_gene_variant
rs56376587	18	77160235	A	C	0.491426	0.0410529	0.00414549	98.0703	22.3938	4.03831e-23	9.90303	CREA	NFATC1	intron_variant, upstream_gene_variant
rs56376587	18	77160235	A	C	0.491426	0.034196	0.00495528	47.6226	11.2868	5.16654e-12	6.90092	URA	NFATC1	intron_variant, upstream_gene_variant
rs58191032	18	47489430	G	A	0.0694015	0.0508064	0.0092096	30.4338	7.4616	3.45462e-08	5.51668	APOA	MYO5B	intron_variant
rs77960347	18	47109955	A	G	0.013283	0.300415	0.020454	215.718	48.1095	7.77141e-49	14.6873	APOA	LIPG	missense_variant, downstream_gene_variant
rs77960347	18	47109955	A	G	0.013283	0.169403	0.0218453	60.1348	14.0527	8.85727e-15	7.75467	CHO	LIPG	missense_variant, downstream_gene_variant
rs77960347	18	47109955	A	G	0.013283	0.255249	0.0202421	159.006	35.7292	1.86552e-36	12.6098	HDL	LIPG	missense_variant, downstream_gene_variant
rs78626055	18	47566647	A	G	0.029119	-0.0784637	0.013963	31.5775	7.71752	1.91637e-08	-5.6194	APOA	MYO5B	missense_variant, non_coding_transcript_exon_variant
rs78626055	18	47566647	A	G	0.029119	-0.080515	0.0138184	33.9499	8.24757	5.65497e-09	-5.82665	HDL	MYO5B	missense_variant, non_coding_transcript_exon_variant
rs10414643	19	50097784	T	C	0.228325	-0.0655691	0.00605854	117.129	26.5702	2.6903e-27	-10.8226	ALB	PRRG2, PRR12, NOSIP	downstream_gene_variant, synonymous_variant, upstream_gene_variant
rs10414643	19	50097784	T	C	0.228325	-0.0642424	0.00615143	109.066	24.8043	1.56928e-25	-10.4435	TPROT	PRRG2, PRR12, NOSIP	downstream_gene_variant, synonymous_variant, upstream_gene_variant
rs1058402	19	45150614	G	A	0.0470117	-0.142345	0.0120394	139.79	31.5288	2.95937e-32	-11.8233	LDL	PVR, CTB-171A8.1	missense_variant&NMD_transcript_variant, missense_variant, upstream_gene_variant, intron_variant&non_coding_transcript_variant
rs1058402	19	45150614	G	A	0.0470117	-0.186258	0.0119765	241.865	53.812	1.5417e-54	-15.552	APOB	PVR, CTB-171A8.1	missense_variant&NMD_transcript_variant, missense_variant, upstream_gene_variant, intron_variant&non_coding_transcript_variant
rs1058402	19	45150614	G	A	0.0470117	-0.11302	0.0120214	88.3896	20.2696	5.37527e-21	-9.40157	CHO	PVR, CTB-171A8.1	missense_variant&NMD_transcript_variant, missense_variant, upstream_gene_variant, intron_variant&non_coding_transcript_variant
rs1132899	19	45448036	C	T	0.492296	0.0336615	0.00514327	42.8339	10.2248	5.95937e-11	6.54477	LDL	APOC2, APOC4, APOC4-APOC2	upstream_gene_variant, missense_variant, missense_variant&NMD_transcript_variant
rs1132899	19	45448036	C	T	0.492296	-0.0305889	0.0047234	41.9388	10.0261	9.41673e-11	-6.47603	APOA	APOC2, APOC4, APOC4-APOC2	upstream_gene_variant, missense_variant, missense_variant&NMD_transcript_variant
rs1132899	19	45448036	C	T	0.492296	0.0519433	0.00511639	103.07	23.4901	3.23519e-24	10.1523	APOB	APOC2, APOC4, APOC4-APOC2	upstream_gene_variant, missense_variant, missense_variant&NMD_transcript_variant
rs1132899	19	45448036	C	T	0.492296	-0.0323351	0.00466952	47.9518	11.3597	4.36817e-12	-6.92472	HDL	APOC2, APOC4, APOC4-APOC2	upstream_gene_variant, missense_variant, missense_variant&NMD_transcript_variant
rs1135062	19	45322744	A	G	0.290079	0.0354478	0.00569561	38.7346	9.31378	4.85534e-10	6.22371	APOB	BCAM	missense_variant, non_coding_transcript_exon_variant, downstream_gene_variant, upstream_gene_variant
rs116959285	19	11230690	C	G	0.0465262	0.0707541	0.0121253	34.0501	8.26994	5.37106e-09	5.83525	LDL	LDLR	intron_variant, intron_variant&NMD_transcript_variant
rs116959285	19	11230690	C	G	0.0465262	0.0711754	0.0120619	34.8199	8.44171	3.61651e-09	5.90084	APOB	LDLR	intron_variant, intron_variant&NMD_transcript_variant
rs117877390	19	19378416	C	T	0.0286997	-0.0859471	0.015343	31.3794	7.6732	2.12227e-08	-5.60171	LDL	HAPLN4, TM6SF2, AC138430.4	upstream_gene_variant, intron_variant, intron_variant&non_coding_transcript_variant, downstream_gene_variant
rs12975366	19	54759361	T	C	0.394546	-0.0308789	0.00479449	41.4802	9.92419	1.19072e-10	-6.4405	APOA	LILRB5	missense_variant, non_coding_transcript_exon_variant
rs12975366	19	54759361	T	C	0.394546	-0.03168	0.00507385	38.9847	9.36943	4.2714e-10	-6.24378	AST	LILRB5	missense_variant, non_coding_transcript_exon_variant
rs12975366	19	54759361	T	C	0.394546	-0.026337	0.00473979	30.8756	7.56049	2.75112e-08	-5.55658	HDL	LILRB5	missense_variant, non_coding_transcript_exon_variant
rs13346373	19	33211069	C	T	0.489849	-0.0229241	0.00415274	30.4731	7.4704	3.38532e-08	-5.52023	CREA	TDRD12, CTD-2538C1.3	intron_variant, upstream_gene_variant
rs142888784	19	38810744	C	G	0.0274193	-0.0941731	0.0163039	33.3636	8.11668	7.64399e-09	-5.77611	CAL	KCNK6, YIF1B	missense_variant, upstream_gene_variant
rs157581	19	45395714	T	C	0.211623	0.0650241	0.00631802	105.922	24.1153	7.66832e-25	10.2918	LDL	PVRL2, TOMM40, CTB-129P6.4	downstream_gene_variant, synonymous_variant, upstream_gene_variant
rs157581	19	45395714	T	C	0.211623	-0.0350272	0.00608852	33.0969	8.0571	8.76799e-09	-5.75299	ALT	PVRL2, TOMM40, CTB-129P6.4	downstream_gene_variant, synonymous_variant, upstream_gene_variant
rs157581	19	45395714	T	C	0.211623	-0.0587263	0.00580225	102.441	23.3522	4.44427e-24	-10.1213	APOA	PVRL2, TOMM40, CTB-129P6.4	downstream_gene_variant, synonymous_variant, upstream_gene_variant
rs157581	19	45395714	T	C	0.211623	0.0876899	0.00628499	194.666	43.516	3.04789e-44	13.9523	APOB	PVRL2, TOMM40, CTB-129P6.4	downstream_gene_variant, synonymous_variant, upstream_gene_variant
rs157581	19	45395714	T	C	0.211623	0.061638	0.00630857	95.4629	21.8219	1.50695e-22	9.77052	CHO	PVRL2, TOMM40, CTB-129P6.4	downstream_gene_variant, synonymous_variant, upstream_gene_variant
rs157581	19	45395714	T	C	0.211623	-0.16214	0.00622629	678.142	148.771	1.69434e-149	-26.0412	CRP	PVRL2, TOMM40, CTB-129P6.4	downstream_gene_variant, synonymous_variant, upstream_gene_variant
rs157581	19	45395714	T	C	0.211623	-0.0415593	0.00573606	52.494	12.365	4.31519e-13	-7.24527	HDL	PVRL2, TOMM40, CTB-129P6.4	downstream_gene_variant, synonymous_variant, upstream_gene_variant
rs157581	19	45395714	T	C	0.211623	0.0556677	0.00616155	81.6256	18.7839	1.64475e-19	9.03469	TRIG	PVRL2, TOMM40, CTB-129P6.4	downstream_gene_variant, synonymous_variant, upstream_gene_variant
rs167479	19	11526765	G	T	0.471043	-0.0342828	0.00475118	52.0653	12.2702	5.36785e-13	-7.21564	SBP	CCDC151, RGL3	downstream_gene_variant, missense_variant, intron_variant&non_coding_transcript_variant, non_coding_transcript_exon_variant, missense_variant&NMD_transcript_variant, synonymous_variant&NMD_transcript_variant, upstream_gene_variant
rs167479	19	11526765	G	T	0.471043	-0.037061	0.00501855	54.5352	12.8162	1.52686e-13	-7.3848	DBP	CCDC151, RGL3	downstream_gene_variant, missense_variant, intron_variant&non_coding_transcript_variant, non_coding_transcript_exon_variant, missense_variant&NMD_transcript_variant, synonymous_variant&NMD_transcript_variant, upstream_gene_variant
rs1761463	19	54823533	T	C	0.304903	0.0294216	0.00507641	33.5907	8.16738	6.80174e-09	5.79575	APOA	LILRA5, AC008984.2	intron_variant, upstream_gene_variant, intron_variant&non_coding_transcript_variant
rs1761463	19	54823533	T	C	0.304903	0.0283274	0.0050185	31.8614	7.781	1.65577e-08	5.64459	HDL	LILRA5, AC008984.2	intron_variant, upstream_gene_variant, intron_variant&non_coding_transcript_variant
C	19	41354533	A	T	0.0283472	0.137303	0.0147759	86.3479	19.8213	1.50904e-20	9.29236	ALP	CYP2A6, CTC-490E21.12	missense_variant, non_coding_transcript_exon_variant, upstream_gene_variant, 3_prime_UTR_variant&NMD_transcript_variant, intron_variant&NMD_transcript_variant
rs202200760	19	17346854	G	C	0.0491172	0.117621	0.0107726	119.215	27.0269	9.3994e-28	10.9185	SHBG	NR2F6, AC010646.3	missense_variant
rs2116942	19	10334663	G	T	0.392649	0.0354135	0.00505068	49.1629	11.6279	2.35559e-12	7.01163	IGF1	CTD-2369P2.2, DNMT1, S1PR2	upstream_gene_variant, intron_variant, synonymous_variant
rs2228671	19	11210912	C	T	0.131351	-0.157437	0.00757318	432.174	95.2623	5.46638e-96	-20.7888	LDL	LDLR	synonymous_variant, non_coding_transcript_exon_variant
rs2228671	19	11210912	C	T	0.131351	-0.145687	0.00753359	373.972	82.5926	2.55505e-83	-19.3383	APOB	LDLR	synonymous_variant, non_coding_transcript_exon_variant
rs2228671	19	11210912	C	T	0.131351	-0.144452	0.00756185	364.913	80.6202	2.39773e-81	-19.1027	CHO	LDLR	synonymous_variant, non_coding_transcript_exon_variant
rs2305744	19	35556123	A	G	0.250027	-0.0714872	0.00584346	149.664	33.6875	2.05353e-34	-12.2337	ALB	HPN, HPN-AS1	intron_variant, intron_variant&non_coding_transcript_variant
rs2305744	19	35556123	A	G	0.250027	-0.0406297	0.00592696	46.992	11.147	7.12853e-12	-6.85507	CAL	HPN, HPN-AS1	intron_variant, intron_variant&non_coding_transcript_variant
rs2305744	19	35556123	A	G	0.250027	-0.0355154	0.00538472	43.5019	10.3731	4.23545e-11	-6.59559	SHBG	HPN, HPN-AS1	intron_variant, intron_variant&non_coding_transcript_variant
rs2305744	19	35556123	A	G	0.250027	-0.0487925	0.00593306	67.6315	15.7053	1.97106e-16	-8.22383	TPROT	HPN, HPN-AS1	intron_variant, intron_variant&non_coding_transcript_variant
rs28399637	19	45324138	G	A	0.313183	0.0823605	0.00560931	215.585	48.0806	8.30615e-49	14.6828	LDL	BCAM	intron_variant, downstream_gene_variant, intron_variant&non_coding_transcript_variant
rs28399637	19	45324138	G	A	0.313183	0.109049	0.00557999	381.922	84.3234	4.74898e-85	19.5429	APOB	BCAM	intron_variant, downstream_gene_variant, intron_variant&non_coding_transcript_variant
rs28399637	19	45324138	G	A	0.313183	0.0690977	0.00560092	152.198	34.2414	5.73588e-35	12.3368	CHO	BCAM	intron_variant, downstream_gene_variant, intron_variant&non_coding_transcript_variant
rs28399637	19	45324138	G	A	0.313183	-0.060618	0.00552787	120.251	27.2537	5.57571e-28	-10.9659	CRP	BCAM	intron_variant, downstream_gene_variant, intron_variant&non_coding_transcript_variant
rs28469095	19	45655333	T	C	0.0924594	0.0531875	0.00877747	36.7181	8.86485	1.36505e-09	6.05955	APOB	PPP1R37, NKPD1, MARK4, AC005757.7	downstream_gene_variant, missense_variant, intron_variant, upstream_gene_variant
rs2965169	19	45251156	A	C	0.388469	-0.0867106	0.00531402	266.255	59.1289	7.4319e-60	-16.3173	LDL	BCL3	upstream_gene_variant, non_coding_transcript_exon_variant
rs2965169	19	45251156	A	C	0.388469	-0.114534	0.00528624	469.43	103.37	4.2658e-104	-21.6664	APOB	BCL3	upstream_gene_variant, non_coding_transcript_exon_variant
rs2965169	19	45251156	A	C	0.388469	-0.0697117	0.00530607	172.609	38.7007	1.99205e-39	-13.1381	CHO	BCL3	upstream_gene_variant, non_coding_transcript_exon_variant
rs3208856	19	45296806	C	T	0.0369445	-0.253577	0.0135656	349.415	77.2454	5.68329e-78	-18.6926	LDL	CBLC	missense_variant
rs3208856	19	45296806	C	T	0.0369445	-0.334699	0.0134947	615.152	135.072	8.47227e-136	-24.8023	APOB	CBLC	missense_variant
rs3208856	19	45296806	C	T	0.0369445	-0.207838	0.0135453	235.436	52.41	3.89045e-53	-15.3439	CHO	CBLC	missense_variant
rs36656	19	54664752	A	C	0.496175	0.0347363	0.00494295	49.3852	11.6771	2.10329e-12	7.02744	ALP	LENG1, TMC4	upstream_gene_variant, synonymous_variant, non_coding_transcript_exon_variant, downstream_gene_variant
rs3745710	19	49261267	C	T	0.0874045	0.0615073	0.00869859	49.9984	11.8129	1.53851e-12	7.07095	ALP	FGF21, FUT1	synonymous_variant, upstream_gene_variant
rs395782	19	10426628	T	C	0.471362	0.0348596	0.00490805	50.446	11.9119	1.2249e-12	7.10254	IGF1	RAVER1, FDX1L, CTD-2369P2.10, CTD-2369P2.12	downstream_gene_variant, non_coding_transcript_exon_variant, synonymous_variant, synonymous_variant&NMD_transcript_variant, upstream_gene_variant, intron_variant, intron_variant&NMD_transcript_variant
rs4804573	19	11277232	G	A	0.474893	-0.0609619	0.00513187	141.113	31.8182	1.51985e-32	-11.8791	LDL	KANK2	3_prime_UTR_variant, non_coding_transcript_exon_variant, downstream_gene_variant
rs4804573	19	11277232	G	A	0.474893	-0.0590867	0.00510504	133.962	30.2542	5.56929e-31	-11.5742	APOB	KANK2	3_prime_UTR_variant, non_coding_transcript_exon_variant, downstream_gene_variant
rs4804573	19	11277232	G	A	0.474893	-0.0517951	0.00512419	102.171	23.293	5.09331e-24	-10.108	CHO	KANK2	3_prime_UTR_variant, non_coding_transcript_exon_variant, downstream_gene_variant
rs61751862	19	49132867	G	C	0.0125112	0.129598	0.0221441	34.2514	8.31485	4.8434e-09	5.85248	ALP	DBP, SPHK2	downstream_gene_variant, missense_variant, 3_prime_UTR_variant&NMD_transcript_variant, intron_variant
rs62128766	19	48337812	C	T	0.186499	0.0433873	0.00659541	43.2755	10.3229	4.75445e-11	6.57841	VITD	CRX, TPRX2P	intron_variant, intron_variant&non_coding_transcript_variant
rs6413504	19	11241915	A	G	0.485691	0.0341778	0.00511162	44.7065	10.6404	2.28876e-11	6.6863	LDL	LDLR, SPC24	intron_variant, intron_variant&non_coding_transcript_variant, downstream_gene_variant
rs6413504	19	11241915	A	G	0.485691	0.0349889	0.0050849	47.3474	11.2258	5.94566e-12	6.88094	APOB	LDLR, SPC24	intron_variant, intron_variant&non_coding_transcript_variant, downstream_gene_variant
rs6859	19	45382034	G	A	0.417709	0.0877135	0.00519815	284.731	63.1554	6.99198e-64	16.874	LDL	PVRL2, CTB-129P6.4	intron_variant, 3_prime_UTR_variant, downstream_gene_variant, upstream_gene_variant
rs6859	19	45382034	G	A	0.417709	0.117895	0.00517098	519.807	114.331	4.66659e-115	22.7994	APOB	PVRL2, CTB-129P6.4	intron_variant, 3_prime_UTR_variant, downstream_gene_variant, upstream_gene_variant
rs6859	19	45382034	G	A	0.417709	0.0720919	0.00519038	192.919	43.1348	7.33162e-44	13.8895	CHO	PVRL2, CTB-129P6.4	intron_variant, 3_prime_UTR_variant, downstream_gene_variant, upstream_gene_variant
rs6859	19	45382034	G	A	0.417709	-0.0532042	0.00512268	107.869	24.5419	2.87144e-25	-10.386	CRP	PVRL2, CTB-129P6.4	intron_variant, 3_prime_UTR_variant, downstream_gene_variant, upstream_gene_variant
rs7250893	19	19625547	A	G	0.352105	-0.0332928	0.00533912	38.8832	9.34685	4.49935e-10	-6.23563	CHO	NDUFA13, TSSK6, CTC-260F20.3, YJEFN3	upstream_gene_variant, synonymous_variant, synonymous_variant&NMD_transcript_variant
rs7260180	19	45028169	T	C	0.366431	-0.0358821	0.00526168	46.5056	11.0393	9.13482e-12	-6.81951	APOB	CEACAM20	non_coding_transcript_exon_variant
rs72658867	19	11231203	G	A	0.0125115	-0.326502	0.022948	202.433	45.2112	6.14894e-46	-14.2279	LDL	LDLR	splice_donor_5th_base_variant&intron_variant, intron_variant, downstream_gene_variant
rs72658867	19	11231203	G	A	0.0125115	-0.312774	0.0228281	187.725	42.001	9.977e-43	-13.7013	APOB	LDLR	splice_donor_5th_base_variant&intron_variant, intron_variant, downstream_gene_variant
rs72658867	19	11231203	G	A	0.0125115	-0.281999	0.0229137	151.462	34.0806	8.30615e-35	-12.307	CHO	LDLR	splice_donor_5th_base_variant&intron_variant, intron_variant, downstream_gene_variant
rs7412	19	45412079	C	T	0.0849301	-0.514963	0.00921877	3120.37	679.426	0	-55.8603	LDL	APOE	missense_variant, downstream_gene_variant
rs7412	19	45412079	C	T	0.0849301	0.125695	0.00846619	220.425	49.1363	7.30634e-50	14.8467	APOA	APOE	missense_variant, downstream_gene_variant
rs7412	19	45412079	C	T	0.0849301	-0.68773	0.00917058	5623.96	1223.2	0	-74.9931	APOB	APOE	missense_variant, downstream_gene_variant
rs7412	19	45412079	C	T	0.0849301	-0.404021	0.00920499	1926.47	420.067	0	-43.8915	CHO	APOE	missense_variant, downstream_gene_variant
rs7412	19	45412079	C	T	0.0849301	0.0992668	0.00908493	119.389	27.0651	8.60796e-28	10.9265	CRP	APOE	missense_variant, downstream_gene_variant
rs7412	19	45412079	C	T	0.0849301	0.0750757	0.00836961	80.4616	18.5281	2.96415e-19	8.97004	HDL	APOE	missense_variant, downstream_gene_variant
rs7412	19	45412079	C	T	0.0849301	0.110858	0.00899046	152.044	34.2079	6.19584e-35	12.3306	TRIG	APOE	missense_variant, downstream_gene_variant
rs741780	19	45404431	T	C	0.434831	-0.0288742	0.00520782	30.7404	7.53023	2.94965e-08	-5.54439	APOB	APOE, TOMM40	upstream_gene_variant, intron_variant, intron_variant&NMD_transcript_variant
rs741780	19	45404431	T	C	0.434831	0.0464996	0.00515918	81.2339	18.6978	2.0054e-19	9.01298	CRP	APOE, TOMM40	upstream_gene_variant, intron_variant, intron_variant&NMD_transcript_variant
rs80168591	19	45284627	G	A	0.0141159	0.123939	0.0216624	32.734	7.97603	1.05674e-08	5.72139	LDL	CBLC	splice_region_variant&intron_variant
rs80168591	19	45284627	G	A	0.0141159	0.171046	0.0215492	63.0033	14.6854	2.06348e-15	7.93746	APOB	CBLC	splice_region_variant&intron_variant
rs80168591	19	45284627	G	A	0.0141159	-0.121098	0.0213479	32.1782	7.85184	1.40657e-08	-5.6726	CRP	CBLC	splice_region_variant&intron_variant
rs8192725	19	41354712	G	A	0.258131	0.0354757	0.00561084	39.9767	9.59004	2.57016e-10	6.32271	ALP	CYP2A6, CTC-490E21.12	intron_variant, intron_variant&non_coding_transcript_variant, upstream_gene_variant, intron_variant&NMD_transcript_variant
rs838144	19	49250239	T	C	0.495706	0.0323439	0.00512089	39.8927	9.57137	2.68306e-10	6.31607	LDL	FUT1, IZUMO1	downstream_gene_variant, upstream_gene_variant
rs838144	19	49250239	T	C	0.495706	-0.085469	0.0049427	299.012	66.2669	5.40879e-67	-17.292	ALP	FUT1, IZUMO1	downstream_gene_variant, upstream_gene_variant
rs838144	19	49250239	T	C	0.495706	0.0322556	0.00509412	40.0932	9.61596	2.42125e-10	6.33193	APOB	FUT1, IZUMO1	downstream_gene_variant, upstream_gene_variant
rs838144	19	49250239	T	C	0.495706	0.0365271	0.00511323	51.0316	12.0415	9.08866e-13	7.14365	CHO	FUT1, IZUMO1	downstream_gene_variant, upstream_gene_variant
rs838144	19	49250239	T	C	0.495706	0.0380999	0.00476534	63.9236	14.8883	1.2933e-15	7.99521	GGT	FUT1, IZUMO1	downstream_gene_variant, upstream_gene_variant
rs838144	19	49250239	T	C	0.495706	-0.0390895	0.00498078	61.5921	14.3742	4.22474e-15	-7.84807	URA	FUT1, IZUMO1	downstream_gene_variant, upstream_gene_variant
rs968445	19	45649386	A	G	0.328861	-0.0448995	0.00570173	62.0113	14.4666	3.41507e-15	-7.87472	LDL	PPP1R37, NKPD1, MARK4, AC005757.7	intron_variant, downstream_gene_variant, non_coding_transcript_exon_variant, intron_variant&non_coding_transcript_variant
rs968445	19	45649386	A	G	0.328861	-0.0601998	0.00567193	112.649	25.5892	2.57513e-26	-10.6136	APOB	PPP1R37, NKPD1, MARK4, AC005757.7	intron_variant, downstream_gene_variant, non_coding_transcript_exon_variant, intron_variant&non_coding_transcript_variant
rs968445	19	45649386	A	G	0.328861	-0.0326295	0.0056932	32.8478	8.00146	9.96644e-09	-5.73131	CHO	PPP1R37, NKPD1, MARK4, AC005757.7	intron_variant, downstream_gene_variant, non_coding_transcript_exon_variant, intron_variant&non_coding_transcript_variant
rs11696196	20	44574533	C	T	0.449871	0.0280092	0.00465583	36.1917	8.74755	1.78834e-09	6.01594	HDL	ZNF335, PCIF1	downstream_gene_variant, intron_variant, intron_variant&non_coding_transcript_variant
rs1800961	20	43042364	C	T	0.0319741	-0.0771548	0.0140921	29.9759	7.35908	4.37442e-08	-5.47504	LDL	HNF4A	missense_variant, 3_prime_UTR_variant&NMD_transcript_variant
rs1800961	20	43042364	C	T	0.0319741	-0.133466	0.0132948	100.781	22.9883	1.02731e-23	-10.039	APOA	HNF4A	missense_variant, 3_prime_UTR_variant&NMD_transcript_variant
rs1800961	20	43042364	C	T	0.0319741	-0.110904	0.0142149	60.8703	14.215	6.09537e-15	-7.80195	CHO	HNF4A	missense_variant, 3_prime_UTR_variant&NMD_transcript_variant
rs1800961	20	43042364	C	T	0.0319741	-0.103429	0.0142004	53.05	12.4879	3.25162e-13	-7.28353	CRP	HNF4A	missense_variant, 3_prime_UTR_variant&NMD_transcript_variant
rs1800961	20	43042364	C	T	0.0319741	-0.126588	0.0131695	92.395	21.1488	7.09905e-22	-9.61221	HDL	HNF4A	missense_variant, 3_prime_UTR_variant&NMD_transcript_variant
rs2076148	20	39788855	A	G	0.476987	0.0324117	0.00497778	42.3966	10.1277	7.45247e-11	6.51128	LDL	PLCG1	intron_variant, upstream_gene_variant, intron_variant&non_coding_transcript_variant, downstream_gene_variant
rs2076148	20	39788855	A	G	0.476987	0.0325612	0.00485335	45.0109	10.7079	1.9593e-11	6.70902	APOB	PLCG1	intron_variant, upstream_gene_variant, intron_variant&non_coding_transcript_variant, downstream_gene_variant
rs2076148	20	39788855	A	G	0.476987	0.028655	0.00502113	32.5684	7.93903	1.15072e-08	5.70688	CHO	PLCG1	intron_variant, upstream_gene_variant, intron_variant&non_coding_transcript_variant, downstream_gene_variant
rs3746575	20	43058096	G	C	0.404525	-0.0323182	0.00475287	46.2362	10.9795	1.04833e-11	-6.79972	SHBG	HNF4A, AL132772.1, RP5-1013A22.5	intron_variant, intron_variant&NMD_transcript_variant, downstream_gene_variant, upstream_gene_variant
rs3787500	20	21336825	A	G	0.34543	0.0303964	0.00513369	35.0577	8.49474	3.20081e-09	5.92097	IGF1	XRN2	intron_variant
rs6059856	20	33057954	G	C	0.493765	0.0227578	0.00415279	30.0318	7.37158	4.2503e-08	5.48012	CREA	ITCH, MIR644A	intron_variant, downstream_gene_variant, upstream_gene_variant, intron_variant&non_coding_transcript_variant
rs9927	20	25277244	A	G	0.495178	-0.0418603	0.00492155	72.3439	16.7428	1.80801e-17	-8.50551	ALP	PYGB, ABHD12	3_prime_UTR_variant, downstream_gene_variant, intron_variant, intron_variant&NMD_transcript_variant, non_coding_transcript_exon_variant
rs762360	21	37425955	T	C	0.303089	-0.038371	0.00529869	52.4408	12.3532	4.43404e-13	-7.2416	IGF1	SETD4, RIMKLBP1	intron_variant, downstream_gene_variant, intron_variant&non_coding_transcript_variant
rs117329800	22	25151741	G	A	0.0185168	0.164454	0.0178586	84.8002	19.4814	3.30065e-20	9.20867	GGT	PIWIL3	intron_variant, intron_variant&non_coding_transcript_variant
rs117373046	22	24568018	T	A	0.0205834	0.0926721	0.0169599	29.8572	7.33249	4.65061e-08	5.46419	GGT	CABIN1	intron_variant, upstream_gene_variant, intron_variant&non_coding_transcript_variant
rs1803690	22	24300102	A	G	0.175559	0.0347486	0.00633456	30.0914	7.38493	4.12164e-08	5.48556	GGT	GSTT2B, AP000350.8	synonymous_variant, downstream_gene_variant
rs186765281	22	25010855	A	G	0.0146917	-0.376701	0.0199359	357.045	78.9071	1.23851e-79	-18.8956	GGT	GGT1, SNRPD3	missense_variant, downstream_gene_variant, missense_variant&NMD_transcript_variant, intron_variant&non_coding_transcript_variant, non_coding_transcript_exon_variant
rs200426740	22	24985742	C	A	0.0411166	-0.267302	0.01209	488.821	107.59	2.5704e-108	-22.1093	GGT	GGT1, FAM211B, SNRPD3	intron_variant, intron_variant&NMD_transcript_variant, intron_variant&non_coding_transcript_variant, non_coding_transcript_exon_variant
rs2070470	22	24583879	T	C	0.173376	-0.052405	0.00635083	68.0902	15.8064	1.56171e-16	-8.25168	GGT	SUSD2	intron_variant, intron_variant&non_coding_transcript_variant
rs2072860	22	37470604	A	G	0.464286	0.0660854	0.00487425	183.821	41.1489	7.09741e-42	13.5581	HBA1C	TMPRSS6	intron_variant
rs535696610	22	24951046	G	C	0.0166416	0.189038	0.0188428	100.648	22.9592	1.0985e-23	10.0324	GGT	SNRPD3, GUCD1	upstream_gene_variant, 5_prime_UTR_variant&NMD_transcript_variant, 5_prime_UTR_variant, intron_variant, non_coding_transcript_exon_variant
rs549700472	22	25023249	C	T	0.0135106	0.141074	0.0209817	45.2073	10.7514	1.77256e-11	6.72367	GGT	GGT1	intron_variant, splice_donor_region_variant&intron_variant, 5_prime_UTR_variant, upstream_gene_variant, intron_variant&NMD_transcript_variant, intron_variant&non_coding_transcript_variant
rs575353765	22	25019956	G	A	0.0104598	0.21378	0.023607	82.0074	18.8678	1.35581e-19	9.05579	GGT	GGT1	intron_variant, upstream_gene_variant, downstream_gene_variant, intron_variant&NMD_transcript_variant, intron_variant&non_coding_transcript_variant
rs6519133	22	39096602	T	C	0.392476	-0.0404142	0.0051298	62.0682	14.4792	3.31742e-15	-7.87832	CRP	JOSD1	5_prime_UTR_variant, intron_variant, non_coding_transcript_exon_variant, upstream_gene_variant
rs6519133	22	39096602	T	C	0.392476	0.0310855	0.0049425	39.557	9.49672	3.18625e-10	6.28943	GGT	JOSD1	5_prime_UTR_variant, intron_variant, non_coding_transcript_exon_variant, upstream_gene_variant
rs71318991	22	25023492	G	A	0.0137027	-0.368138	0.0206683	317.257	70.2417	5.73192e-71	-17.8117	GGT	GGT1	missense_variant, 3_prime_UTR_variant&NMD_transcript_variant, non_coding_transcript_exon_variant, upstream_gene_variant
rs737128	22	24988920	C	T	0.271556	0.150825	0.00541473	775.876	170.023	9.48418e-171	27.8546	GGT	GGT1, FAM211B, SNRPD3	intron_variant, synonymous_variant, synonymous_variant&NMD_transcript_variant, intron_variant&NMD_transcript_variant, upstream_gene_variant, non_coding_transcript_exon_variant, intron_variant&non_coding_transcript_variant
rs75439392	22	44377221	G	T	0.0659961	0.0670251	0.00990631	45.7774	10.8778	1.32495e-11	6.7659	ALT	SAMM50	intron_variant, intron_variant&non_coding_transcript_variant
rs75439392	22	44377221	G	T	0.0659961	0.0667274	0.0099943	44.5762	10.6115	2.44625e-11	6.67655	AST	SAMM50	intron_variant, intron_variant&non_coding_transcript_variant
rs2073787	23	109694685	T	A	0.415383	-0.0272475	0.00426702	40.7758	9.76769	1.7073e-10	-6.3856	LDL	RGAG1	synonymous_variant, downstream_gene_variant
rs2073787	23	109694685	T	A	0.415383	-0.0315198	0.00415983	57.4135	13.452	3.53183e-14	-7.57718	APOB	RGAG1	synonymous_variant, downstream_gene_variant
rs2073787	23	109694685	T	A	0.415383	-0.0248393	0.00430347	33.315	8.10582	7.83754e-09	-5.77192	CHO	RGAG1	synonymous_variant, downstream_gene_variant
rs2073787	23	109694685	T	A	0.415383	0.0571129	0.00401789	202.056	45.1288	7.43361e-46	14.2146	SHBG	RGAG1	synonymous_variant, downstream_gene_variant
rs2073787	23	109694685	T	A	0.415383	-0.0242291	0.0042758	32.1099	7.83657	1.4569e-08	-5.66657	TRIG	RGAG1	synonymous_variant, downstream_gene_variant

## Sheet: Table S2
rsID	Chromosome	Position (hg19)	Ref	Alt	MAF	Estimate	SE	Chi-Sq	Log10 P-value	P-value	Z-value	Measurement	Gene	Feature type (VEP)
rs10798489	1	176935711	T	C	0.0867071	0.0728491	0.00852064	73.0977	16.9087	1.23396e-17	8.54972	IGF1	ASTN1	intron_variant&non_coding_transcript_variant, intron_variant
rs10799708	1	22046558	C	A	0.427568	0.0317126	0.00498909	40.4037	9.68497	2.06552e-10	6.35639	PHOS	USP48	intron_variant, intron_variant&non_coding_transcript_variant, downstream_gene_variant
rs10917025	1	21952590	G	A	0.215864	-0.0722921	0.00581825	154.382	34.7188	1.91073e-35	-12.4251	ALP	RAP1GAP	intron_variant, intron_variant&non_coding_transcript_variant, upstream_gene_variant, intron_variant&NMD_transcript_variant
rs11102523	1	113261085	G	A	0.495429	0.0234849	0.00407148	33.2714	8.09609	8.01512e-09	5.76815	CREA	PPM1J, FAM19A3, RP11-426L16.9	upstream_gene_variant, downstream_gene_variant
rs11122400	1	230280259	C	G	0.464377	0.0321905	0.00460621	48.8391	11.5562	2.77843e-12	6.9885	APOA	GALNT2	intron_variant, intron_variant&non_coding_transcript_variant
rs11122400	1	230280259	C	G	0.464377	0.0380889	0.0045512	70.0398	16.2357	5.81166e-17	8.36898	HDL	GALNT2	intron_variant, intron_variant&non_coding_transcript_variant
rs11122400	1	230280259	C	G	0.464377	-0.0290353	0.00486355	35.6406	8.62472	2.3729e-09	-5.96998	TRIG	GALNT2	intron_variant, intron_variant&non_coding_transcript_variant
rs11208683	1	66063341	T	C	0.440743	-0.0558982	0.00501173	124.4	28.162	6.88652e-29	-11.1535	CRP	LEPR	intron_variant, intron_variant&non_coding_transcript_variant
rs11264311	1	155054743	A	C	0.494836	0.0463465	0.00468479	97.8708	22.3501	4.46581e-23	9.89297	GGT	EFNA3	intron_variant, upstream_gene_variant
rs11265002	1	158489063	T	C	0.462882	0.0420202	0.004749	78.2909	18.0509	8.89406e-19	8.84822	HBA1C	RP11-144L1.8, OR10R1P	upstream_gene_variant, downstream_gene_variant
rs11265260	1	159700039	A	G	0.0569977	0.194895	0.0107128	330.979	73.2303	5.88437e-74	18.1927	CRP	.	intergenic_variant
rs11265263	1	159710517	C	A	0.0702079	-0.210419	0.00979814	461.193	101.578	2.64241e-102	-21.4754	CRP	.	intergenic_variant
rs1130564	1	21952884	G	A	0.0612971	-0.18263	0.00997611	335.138	74.1363	7.30634e-75	-18.3067	ALP	RAP1GAP	synonymous_variant, 5_prime_UTR_variant, non_coding_transcript_exon_variant, upstream_gene_variant, 5_prime_UTR_variant&NMD_transcript_variant
rs1130564	1	21952884	G	A	0.0612971	0.07658	0.0102534	55.7823	13.0918	8.09469e-14	7.46874	PHOS	RAP1GAP	synonymous_variant, 5_prime_UTR_variant, non_coding_transcript_exon_variant, upstream_gene_variant, 5_prime_UTR_variant&NMD_transcript_variant
rs113188187	1	159677904	C	T	0.0223922	0.110458	0.0168187	43.133	10.2912	5.11446e-11	6.56757	CRP	CRP, CRPP1	downstream_gene_variant, upstream_gene_variant
rs113487566	1	51599038	C	T	0.0237699	0.114605	0.0165737	47.8155	11.3295	4.68274e-12	6.91487	CAL	C1orf185	intron_variant, downstream_gene_variant
rs113905406	1	110004306	T	C	0.0132743	-0.132954	0.0212952	38.9796	9.36831	4.28243e-10	-6.24338	APOB	SYPL2	upstream_gene_variant
rs115585839	1	159726586	G	T	0.0219921	0.0997704	0.0170006	34.4411	8.35718	4.39359e-09	5.86864	CRP	RP11-419N10.5	upstream_gene_variant
rs11577605	1	21645767	A	G	0.121124	-0.0527069	0.00735233	51.3907	12.1209	7.57007e-13	-7.16873	ALP	ECE1	intron_variant, intron_variant&non_coding_transcript_variant
rs11585450	1	161696782	C	G	0.488634	-0.0398005	0.00505529	61.9847	14.4608	3.46099e-15	-7.87304	TPROT	FCRLB	missense_variant&splice_region_variant, splice_region_variant&synonymous_variant, splice_region_variant&non_coding_transcript_exon_variant
rs11590603	1	65951897	A	G	0.477085	0.0662216	0.0049976	175.58	39.3496	4.47095e-40	13.2507	CRP	LEPR, RP4-630A11.3	intron_variant, upstream_gene_variant
rs11591147	1	55505647	G	T	0.0194355	-0.369606	0.0179328	424.797	93.6566	2.20496e-94	-20.6106	LDL	PCSK9	missense_variant, upstream_gene_variant
rs11591147	1	55505647	G	T	0.0194355	-0.347325	0.0176566	386.954	85.419	3.81066e-86	-19.6711	APOB	PCSK9	missense_variant, upstream_gene_variant
rs11591147	1	55505647	G	T	0.0194355	-0.330927	0.0179627	339.406	75.0658	8.59409e-76	-18.423	CHO	PCSK9	missense_variant, upstream_gene_variant
rs115984621	1	159244544	G	A	0.0372349	-0.0896673	0.0131866	46.2382	10.98	1.04713e-11	-6.79988	CRP	MPTX1, OR10J2P	upstream_gene_variant, downstream_gene_variant
rs116307748	1	21775050	G	A	0.0171175	0.143739	0.0185021	60.3542	14.1011	7.92319e-15	7.76879	ALP	NBPF3	intron_variant, intron_variant&non_coding_transcript_variant, downstream_gene_variant
rs1168002	1	62934308	G	A	0.359678	-0.0410306	0.00516397	63.1318	14.7137	1.9333e-15	-7.94555	LDL	DOCK7	intron_variant
rs1168002	1	62934308	G	A	0.359678	-0.0338203	0.0047786	50.0903	11.8332	1.46825e-12	-7.07745	APOA	DOCK7	intron_variant
rs1168002	1	62934308	G	A	0.359678	-0.0299949	0.00508443	34.8025	8.43781	3.64914e-09	-5.89936	APOB	DOCK7	intron_variant
rs1168002	1	62934308	G	A	0.359678	-0.0539299	0.0051726	108.703	24.7247	1.88495e-25	-10.4261	CHO	DOCK7	intron_variant
rs1168002	1	62934308	G	A	0.359678	-0.0769196	0.00504557	232.409	51.7501	1.77787e-52	-15.245	TRIG	DOCK7	intron_variant
rs12047949	1	21842097	G	A	0.489635	-0.0317652	0.00480592	43.6867	10.4141	3.8539e-11	-6.6096	ALP	ALPL	intron_variant, intron_variant&non_coding_transcript_variant
rs12125935	1	158438592	C	T	0.480596	-0.0375361	0.00474412	62.6018	14.5968	2.53046e-15	-7.91213	HBA1C	OR10K1	downstream_gene_variant
rs1262265	1	21857418	C	T	0.236094	-0.103921	0.00563734	339.829	75.1578	6.95344e-76	-18.4344	ALP	ALPL	intron_variant, intron_variant&non_coding_transcript_variant
rs12732125	1	55470153	C	T	0.021002	-0.113636	0.0172836	43.2277	10.3122	4.87304e-11	-6.57479	LDL	BSND	intron_variant
rs12732125	1	55470153	C	T	0.021002	-0.103147	0.0170174	36.7389	8.86948	1.35058e-09	-6.06127	APOB	BSND	intron_variant
rs12732125	1	55470153	C	T	0.021002	-0.0984118	0.0173125	32.3129	7.88194	1.31238e-08	-5.68444	CHO	BSND	intron_variant
rs12742048	1	22114970	A	G	0.337333	0.0322131	0.00507647	40.2664	9.65445	2.2159e-10	6.34557	ALP	USP48	upstream_gene_variant
rs12754932	1	159348545	G	C	0.0183548	0.105242	0.0186033	32.0034	7.81276	1.539e-08	5.65717	CRP	RP11-550P17.5	intron_variant&non_coding_transcript_variant
rs12760385	1	159722353	A	G	0.0217954	0.123535	0.0170634	52.414	12.3473	4.49469e-13	7.23976	CRP	.	intergenic_variant
rs1293261	1	25713234	T	A	0.47164	-0.0295235	0.00488152	36.5784	8.83373	1.46646e-09	-6.04801	APOB	RHCE	intron_variant, intron_variant&non_coding_transcript_variant, intron_variant&NMD_transcript_variant
rs138361368	1	109825558	C	A	0.0199175	-0.121425	0.0177126	46.9945	11.1476	7.11869e-12	-6.85529	LDL	PSRC1	intron_variant, 5_prime_UTR_variant, intron_variant&non_coding_transcript_variant, upstream_gene_variant
rs138361368	1	109825558	C	A	0.0199175	-0.14382	0.0174398	68.0077	15.7882	1.62855e-16	-8.24665	APOB	PSRC1	intron_variant, 5_prime_UTR_variant, intron_variant&non_coding_transcript_variant, upstream_gene_variant
rs138361368	1	109825558	C	A	0.0199175	-0.0983164	0.0177422	30.7069	7.52274	3.00096e-08	-5.54139	CHO	PSRC1	intron_variant, 5_prime_UTR_variant, intron_variant&non_coding_transcript_variant, upstream_gene_variant
rs1386821	1	154382049	T	G	0.203185	-0.0556972	0.0061959	80.8088	18.6044	2.48657e-19	-8.98936	CRP	IL6R, RP11-350G8.5, RP11-350G8.7	intron_variant, upstream_gene_variant, downstream_gene_variant
rs140584594	1	110232983	G	A	0.269866	-0.0372375	0.00513703	52.5455	12.3764	4.20339e-13	-7.24884	APOA	GSTM1, GSTM2, AC000032.2	missense_variant, intron_variant, downstream_gene_variant, intron_variant&non_coding_transcript_variant
rs140584594	1	110232983	G	A	0.269866	-0.0314565	0.00507568	38.4089	9.24131	5.73707e-10	-6.19749	HDL	GSTM1, GSTM2, AC000032.2	missense_variant, intron_variant, downstream_gene_variant, intron_variant&non_coding_transcript_variant
rs141737681	1	159205408	C	T	0.0118054	-0.14199	0.0231323	37.677	9.07841	8.34815e-10	-6.13817	CRP	.	intergenic_variant
rs1446976	1	159629194	A	G	0.350802	0.0530683	0.00524599	102.333	23.3286	4.69245e-24	10.116	CRP	.	intergenic_variant
rs145663198	1	159475349	A	G	0.0234805	-0.0908309	0.016573	30.0375	7.37287	4.2377e-08	-5.48066	CRP	.	intergenic_variant
rs1471633	1	145723739	C	A	0.463175	0.0360893	0.00418701	74.2933	17.1718	6.73287e-18	8.61935	URT	PDZK1	upstream_gene_variant
rs149344982	1	21889760	G	A	0.0133051	-0.689569	0.0208859	1090.05	238.319	4.79733e-239	-33.016	ALP	ALPL	missense_variant, non_coding_transcript_exon_variant
rs149913193	1	159317442	A	T	0.0472651	-0.0934912	0.0117727	63.0655	14.6991	1.9994e-15	-7.94136	CRP	RP11-550P17.5, OR10J7P	intron_variant&non_coding_transcript_variant, upstream_gene_variant
rs151192254	1	21983600	G	C	0.0106676	-0.140973	0.0240217	34.4402	8.357	4.39542e-09	-5.86857	PHOS	RAP1GAP	intron_variant, upstream_gene_variant, intron_variant&non_coding_transcript_variant, intron_variant&NMD_transcript_variant
rs1697421	1	21823292	C	T	0.495192	-0.103644	0.00479454	467.302	102.907	1.2388e-103	-21.6171	ALP	.	intergenic_variant
rs1697421	1	21823292	C	T	0.495192	0.0986877	0.0049278	401.07	88.492	3.22107e-89	20.0267	PHOS	.	intergenic_variant
rs17162387	1	27293356	T	G	0.0796667	-0.0500146	0.0088359	32.04	7.82093	1.51032e-08	-5.66039	IGF1	.	intergenic_variant
rs17162387	1	27293356	T	G	0.0796667	-0.0584012	0.00838725	48.4846	11.4777	3.32889e-12	-6.96309	SHBG	.	intergenic_variant
rs17459069	1	159648693	C	T	0.0401459	-0.111722	0.012694	77.4605	17.8684	1.35394e-18	-8.80117	CRP	.	intergenic_variant
rs1759499	1	55631782	T	G	0.373646	-0.0299913	0.0051369	34.0869	8.27815	5.27048e-09	-5.8384	LDL	USP24	intron_variant
rs1759499	1	55631782	T	G	0.373646	-0.0287876	0.00505777	32.3961	7.90053	1.25739e-08	-5.69176	APOB	USP24	intron_variant
rs17645031	1	109834938	C	T	0.0863107	-0.0781978	0.00883467	78.3444	18.0627	8.65566e-19	-8.85124	LDL	MYBPHL	downstream_gene_variant
rs17645031	1	109834938	C	T	0.0863107	-0.101937	0.00869859	137.329	30.9908	1.02141e-31	-11.7188	APOB	MYBPHL	downstream_gene_variant
rs17645031	1	109834938	C	T	0.0863107	-0.0614416	0.00884943	48.2054	11.4159	3.83796e-12	-6.943	CHO	MYBPHL	downstream_gene_variant
rs17712208	1	214150445	T	A	0.0347412	0.103901	0.0129247	64.6255	15.043	9.05733e-16	8.03895	HBA1C	PROX1-AS1	intron_variant&non_coding_transcript_variant
rs1801274	1	161479745	G	A	0.468188	-0.0503681	0.00508629	98.0637	22.3924	4.05135e-23	-9.90272	TPROT	FCGR2A, RP11-25K21.6	missense_variant, upstream_gene_variant, missense_variant&NMD_transcript_variant, non_coding_transcript_exon_variant, downstream_gene_variant, 3_prime_UTR_variant&NMD_transcript_variant
rs184076217	1	51856455	T	C	0.0235686	0.0962964	0.0166601	33.409	8.12681	7.46775e-09	5.78006	CAL	EPS15	intron_variant, downstream_gene_variant
rs2050525	1	221066985	T	A	0.484559	-0.0284296	0.00478387	35.3171	8.55258	2.80169e-09	-5.9428	IGF1	.	intergenic_variant
rs2102945	1	21718145	C	T	0.498887	0.0291117	0.00480086	36.7702	8.87645	1.32908e-09	6.06385	ALP	.	intergenic_variant
rs2325917	1	159221138	G	A	0.40464	0.0359736	0.00507128	50.3191	11.8838	1.30677e-12	7.09359	CRP	.	intergenic_variant
rs2479418	1	55494877	A	G	0.469987	0.0276401	0.00497138	30.9119	7.56863	2.70004e-08	5.55984	LDL	.	intergenic_variant
rs2479418	1	55494877	A	G	0.469987	0.0288436	0.0048948	34.7239	8.42029	3.79936e-09	5.8927	APOB	.	intergenic_variant
rs2479418	1	55494877	A	G	0.469987	0.028733	0.00497968	33.2935	8.10101	7.92483e-09	5.77005	CHO	.	intergenic_variant
rs2495489	1	55498864	A	T	0.250618	0.0368788	0.00573432	41.3608	9.89767	1.2657e-10	6.43124	LDL	.	intergenic_variant
rs2495489	1	55498864	A	T	0.250618	0.0340383	0.0057439	35.1175	8.50807	3.10406e-09	5.92599	CHO	.	intergenic_variant
rs2780873	1	63360675	A	C	0.0820708	-0.0497294	0.00882791	31.733	7.7523	1.76889e-08	-5.6332	TRIG	RP4-771M4.3	upstream_gene_variant
rs2794519	1	159668514	T	C	0.440956	-0.097265	0.00504596	371.558	82.067	8.57038e-83	-19.2758	CRP	.	intergenic_variant
rs2990220	1	155190254	A	T	0.491948	0.0280612	0.00503707	31.0354	7.59625	2.53367e-08	5.57094	CAL	GBAP1	intron_variant&non_coding_transcript_variant, upstream_gene_variant
rs2990220	1	155190254	A	T	0.491948	0.0274105	0.00466488	34.5264	8.37623	4.20504e-09	5.87593	GGT	GBAP1	intron_variant&non_coding_transcript_variant, upstream_gene_variant
rs2990220	1	155190254	A	T	0.491948	0.0292812	0.00487428	36.0874	8.72432	1.8866e-09	6.00729	URA	GBAP1	intron_variant&non_coding_transcript_variant, upstream_gene_variant
rs2990220	1	155190254	A	T	0.491948	0.0314732	0.00417744	56.7622	13.3082	4.91813e-14	7.53409	URT	GBAP1	intron_variant&non_coding_transcript_variant, upstream_gene_variant
rs35485101	1	159566170	T	A	0.0465525	0.0922157	0.0118633	60.4227	14.1162	7.65244e-15	7.77319	CRP	OR10J6P	upstream_gene_variant
rs4233334	1	89147213	T	A	0.461266	-0.0283363	0.00468493	36.5831	8.83477	1.46295e-09	-6.04839	GGT	PKN2, RP11-76N22.2	upstream_gene_variant, intron_variant&non_coding_transcript_variant
rs4233335	1	89408073	C	A	0.498325	0.0269486	0.00466547	33.3641	8.11679	7.64205e-09	5.77618	GGT	CCBL2	intron_variant, intron_variant&non_coding_transcript_variant
rs4268379	1	109778237	T	C	0.497407	-0.0388759	0.00495012	61.6779	14.3931	4.04483e-15	-7.85353	LDL	SARS	intron_variant, upstream_gene_variant, downstream_gene_variant
rs4268379	1	109778237	T	C	0.497407	-0.0501254	0.00487387	105.771	24.0822	8.27561e-25	-10.2845	APOB	SARS	intron_variant, upstream_gene_variant, downstream_gene_variant
rs4268379	1	109778237	T	C	0.497407	-0.0303762	0.00495838	37.5308	9.04584	8.99829e-10	-6.12623	CHO	SARS	intron_variant, upstream_gene_variant, downstream_gene_variant
rs4278348	1	66175395	C	T	0.473085	0.082511	0.00499006	273.409	60.688	2.05116e-61	16.5351	CRP	.	intergenic_variant
rs4382717	1	154518610	T	C	0.353746	0.0303412	0.00500886	36.6934	8.85934	1.38248e-09	6.05751	ALP	UBE2Q1, TDRD10	downstream_gene_variant, intron_variant, intron_variant&non_coding_transcript_variant
rs4382717	1	154518610	T	C	0.353746	0.0547756	0.00521199	110.451	25.1075	7.80728e-26	10.5095	CRP	UBE2Q1, TDRD10	downstream_gene_variant, intron_variant, intron_variant&non_coding_transcript_variant
rs4655764	1	66126159	C	T	0.383664	-0.0284029	0.00493541	33.1191	8.06206	8.66842e-09	-5.75492	ALP	.	intergenic_variant
rs4655764	1	66126159	C	T	0.383664	-0.120918	0.00513556	554.38	121.853	1.40281e-122	-23.5452	CRP	.	intergenic_variant
rs4661714	1	16495702	T	C	0.0805093	-0.0501474	0.0085683	34.2537	8.31537	4.8376e-09	-5.85267	GGT	.	intergenic_variant
rs4845612	1	154358583	T	C	0.451701	-0.0278421	0.0050872	29.9535	7.35405	4.42537e-08	-5.47297	TPROT	.	intergenic_variant
rs484959	1	110366083	C	T	0.464187	0.0281538	0.00506446	30.9034	7.56672	2.71194e-08	5.55909	TPROT	RP4-735C1.6	upstream_gene_variant
rs4915853	1	63191577	A	C	0.409061	-0.0372889	0.00503732	54.7974	12.8741	1.33629e-13	-7.40253	LDL	.	intergenic_variant
rs4915853	1	63191577	A	C	0.409061	-0.0274696	0.0046614	34.7275	8.4211	3.79228e-09	-5.89299	APOA	.	intergenic_variant
rs4915853	1	63191577	A	C	0.409061	-0.0279988	0.00495973	31.8686	7.78263	1.64957e-08	-5.64523	APOB	.	intergenic_variant
rs4915853	1	63191577	A	C	0.409061	-0.0485195	0.00504573	92.4665	21.1645	6.84699e-22	-9.61595	CHO	.	intergenic_variant
rs4915853	1	63191577	A	C	0.409061	-0.0631939	0.00492182	164.854	37.0067	9.84691e-38	-12.8395	TRIG	.	intergenic_variant
rs4925659	1	247603463	G	A	0.407845	0.03354	0.00506178	43.9054	10.4626	3.44667e-11	6.62613	CRP	NLRP3	intron_variant, upstream_gene_variant
rs514230	1	234858597	T	A	0.484518	-0.0406875	0.00498274	66.6783	15.4953	3.19669e-16	-8.16569	LDL	RP4-781K5.7, LINC01132	downstream_gene_variant, upstream_gene_variant
rs514230	1	234858597	T	A	0.484518	-0.0381133	0.00490599	60.3531	14.1008	7.92866e-15	-7.76873	APOB	RP4-781K5.7, LINC01132	downstream_gene_variant, upstream_gene_variant
rs514230	1	234858597	T	A	0.484518	-0.0387304	0.00499106	60.2167	14.0707	8.49767e-15	-7.75995	CHO	RP4-781K5.7, LINC01132	downstream_gene_variant, upstream_gene_variant
rs56079255	1	110162190	C	T	0.0469587	-0.0750791	0.0115437	42.3006	10.1064	7.82708e-11	-6.5039	APOB	AMPD2	upstream_gene_variant, non_coding_transcript_exon_variant, intron_variant
rs610249	1	109692641	A	G	0.437258	-0.0273739	0.00499111	30.0801	7.3824	4.14572e-08	-5.48453	LDL	KIAA1324	intron_variant, intron_variant&non_coding_transcript_variant, intron_variant&NMD_transcript_variant
rs610249	1	109692641	A	G	0.437258	-0.0314157	0.00491423	40.8681	9.78818	1.62862e-10	-6.3928	APOB	KIAA1324	intron_variant, intron_variant&non_coding_transcript_variant, intron_variant&NMD_transcript_variant
rs629001	1	109838918	T	C	0.0721406	-0.0556916	0.00957058	33.8612	8.22778	5.91861e-09	-5.81904	LDL	MYBPHL	missense_variant, intron_variant&non_coding_transcript_variant, non_coding_transcript_exon_variant
rs629001	1	109838918	T	C	0.0721406	-0.0722779	0.00942316	58.8325	13.7653	1.71672e-14	-7.67024	APOB	MYBPHL	missense_variant, intron_variant&non_coding_transcript_variant, non_coding_transcript_exon_variant
rs651649	1	109832027	A	G	0.472152	-0.0366931	0.00494835	54.9854	12.9157	1.21423e-13	-7.41522	LDL	MYBPHL	downstream_gene_variant
rs651649	1	109832027	A	G	0.472152	-0.0476612	0.00487213	95.6955	21.873	1.33968e-22	-9.78242	APOB	MYBPHL	downstream_gene_variant
rs651649	1	109832027	A	G	0.472152	-0.0298896	0.00495661	36.3638	8.78591	1.63716e-09	-6.03025	CHO	MYBPHL	downstream_gene_variant
rs653523	1	230318402	C	T	0.158525	-0.0537166	0.00626349	73.5502	17.0083	9.8107e-18	-8.57615	APOA	GALNT2	intron_variant, intron_variant&non_coding_transcript_variant
rs653523	1	230318402	C	T	0.158525	-0.0626387	0.00618869	102.444	23.3529	4.43711e-24	-10.1215	HDL	GALNT2	intron_variant, intron_variant&non_coding_transcript_variant
rs653523	1	230318402	C	T	0.158525	0.0384264	0.00661342	33.7604	8.20526	6.23362e-09	5.81037	TRIG	GALNT2	intron_variant, intron_variant&non_coding_transcript_variant
rs6603859	1	16706075	T	G	0.487278	-0.0408987	0.00466215	76.9568	17.7576	1.74743e-18	-8.7725	GGT	SZRD1	intron_variant, intron_variant&non_coding_transcript_variant, intron_variant&NMD_transcript_variant
rs6672331	1	65975847	G	C	0.0325101	0.140842	0.0140372	100.671	22.9642	1.08593e-23	10.0335	CRP	LEPR	intron_variant
rs6676143	1	16528218	G	T	0.473659	0.0309526	0.00484254	40.8552	9.78532	1.63938e-10	6.39181	ALT	ARHGEF19, ARHGEF19-AS1	intron_variant, downstream_gene_variant, intron_variant&non_coding_transcript_variant
rs6676143	1	16528218	G	T	0.473659	0.0274015	0.00485076	31.91	7.79188	1.6148e-08	5.64891	AST	ARHGEF19, ARHGEF19-AS1	intron_variant, downstream_gene_variant, intron_variant&non_coding_transcript_variant
rs6676143	1	16528218	G	T	0.473659	0.0597548	0.00467288	163.522	36.7157	1.92442e-37	12.7876	GGT	ARHGEF19, ARHGEF19-AS1	intron_variant, downstream_gene_variant, intron_variant&non_coding_transcript_variant
rs6687726	1	154400320	G	A	0.427642	0.0610148	0.00505393	145.751	32.8323	1.4713e-33	12.0727	CRP	IL6R	intron_variant, upstream_gene_variant
rs6695557	1	66349013	G	A	0.48626	-0.0450286	0.00500017	81.0972	18.6678	2.14882e-19	-9.00541	CRP	PDE4B	intron_variant
rs6701146	1	66265499	G	C	0.414283	-0.0333638	0.00505097	43.6318	10.4019	3.96369e-11	-6.60542	CRP	PDE4B	intron_variant
rs71632979	1	161526397	A	G	0.116688	-0.12149	0.00789586	236.747	52.696	2.01372e-53	-15.3865	TPROT	RP11-5K23.5, RP11-25K21.6, FCGR3A	intron_variant&non_coding_transcript_variant, intron_variant
rs75059470	1	21846434	C	T	0.0220057	0.0912419	0.0163159	31.2729	7.64939	2.24187e-08	5.59221	ALP	ALPL	intron_variant, intron_variant&non_coding_transcript_variant
rs75179731	1	159245182	C	T	0.0471051	-0.0832077	0.0118037	49.6926	11.7452	1.79804e-12	-7.04929	CRP	MPTX1, OR10J2P	upstream_gene_variant, downstream_gene_variant
rs7518049	1	51933774	G	A	0.0230227	0.104173	0.016844	38.2492	9.20578	6.22616e-10	6.18458	CAL	EPS15, RP11-253A20.1	intron_variant&non_coding_transcript_variant, intron_variant, downstream_gene_variant, upstream_gene_variant, intron_variant&NMD_transcript_variant
rs75200282	1	22187452	G	A	0.0347886	-0.093568	0.0130675	51.2703	12.0943	8.04822e-13	-7.16036	ALP	HSPG2	intron_variant
rs7523412	1	25294264	G	A	0.498327	-0.0296053	0.00507132	34.0798	8.27656	5.28981e-09	-5.83779	TPROT	RUNX3, RP11-84D1.1, RP11-84D1.2	upstream_gene_variant, downstream_gene_variant
rs7544010	1	176792798	A	G	0.458985	-0.0354139	0.00480503	54.3194	12.7685	1.70412e-13	-7.37017	IGF1	PAPPA2	intron_variant, intron_variant&non_coding_transcript_variant
rs7551981	1	55719166	T	G	0.374442	-0.0358156	0.00513819	48.5875	11.5005	3.15864e-12	-6.97047	LDL	.	intergenic_variant
rs7551981	1	55719166	T	G	0.374442	-0.0311693	0.00505904	37.9593	9.14126	7.22337e-10	-6.16111	APOB	.	intergenic_variant
rs7551981	1	55719166	T	G	0.374442	-0.0329895	0.00514676	41.0849	9.83638	1.45754e-10	-6.40976	CHO	.	intergenic_variant
rs75733314	1	197201223	G	A	0.0225662	-0.0944528	0.0169389	31.0927	7.60908	2.45991e-08	-5.57609	GLUC	CRB1	intron_variant
rs786916	1	89290857	T	C	0.45734	-0.027645	0.00468396	34.8344	8.44493	3.5898e-09	-5.90206	GGT	PKN2, TCEB1P19	intron_variant, upstream_gene_variant
rs79219014	1	154415675	G	T	0.0265492	-0.0993502	0.0155324	40.913	9.79818	1.59155e-10	-6.39632	CRP	IL6R	intron_variant, intron_variant&non_coding_transcript_variant
rs79484271	1	21347215	T	C	0.0469335	0.0680106	0.0113253	36.0624	8.71873	1.91104e-09	6.00519	ALP	EIF4G3	intron_variant
rs829409	1	21953040	G	A	0.072843	0.0636346	0.00923838	47.4455	11.2475	5.65588e-12	6.88807	ALP	RAP1GAP	intron_variant, intron_variant&non_coding_transcript_variant, upstream_gene_variant, intron_variant&NMD_transcript_variant
rs863365	1	158551329	T	C	0.462267	0.042917	0.00475476	81.4705	18.7498	1.7791e-19	9.02611	HBA1C	OR10X1	upstream_gene_variant
rs924202	1	16442847	G	A	0.443836	-0.0281492	0.00468195	36.1477	8.73775	1.82915e-09	-6.01228	GGT	.	intergenic_variant
rs9426769	1	21942379	G	C	0.453967	-0.0524622	0.00481295	118.815	26.9394	1.14974e-27	-10.9002	ALP	RAP1GAP	intron_variant, downstream_gene_variant, intron_variant&non_coding_transcript_variant, intron_variant&NMD_transcript_variant
rs9426772	1	21959590	C	T	0.456185	0.028515	0.0048078	35.1766	8.52125	3.01127e-09	5.93099	ALP	RAP1GAP	intron_variant, intron_variant&non_coding_transcript_variant, intron_variant&NMD_transcript_variant
rs9427116	1	154631123	C	T	0.481453	0.0341476	0.00499125	46.8062	11.1059	7.8361e-12	6.84149	CRP	.	intergenic_variant
rs9427116	1	154631123	C	T	0.481453	-0.0267231	0.00455136	34.474	8.36452	4.31996e-09	-5.87145	SHBG	.	intergenic_variant
rs10199994	2	234138714	G	C	0.439374	0.0281886	0.00487044	33.4973	8.14654	7.13608e-09	5.78769	TBIL	ATG16L1	intron_variant
rs10203853	2	234687418	A	T	0.472718	-0.320765	0.00483896	4394.12	956.09	0	-66.288	TBIL	MROH2A	intron_variant, upstream_gene_variant
rs10865035	2	100835734	G	A	0.473302	0.0316374	0.00506051	39.0853	9.39181	4.05686e-10	6.25182	TPROT	LINC01104	intron_variant&non_coding_transcript_variant
rs113407226	2	27486134	G	A	0.100363	0.0461237	0.00808718	32.5278	7.92996	1.17501e-08	5.70331	TRIG	SLC30A3	upstream_gene_variant, intron_variant
rs114346341	2	234563065	A	G	0.0285836	0.476203	0.014494	1079.46	236.017	9.61612e-237	32.8552	TBIL	UGT1A10, UGT1A8	intron_variant
rs114667609	2	234494716	T	G	0.0221413	-0.185087	0.0164111	127.197	28.7742	1.6819e-29	-11.2782	TBIL	UGT1A12P	non_coding_transcript_exon_variant
rs114970452	2	234300953	G	A	0.0181057	-0.174607	0.0181521	92.5267	21.1777	6.64202e-22	-9.61911	TBIL	DGKD, AC019221.4	intron_variant, non_coding_transcript_exon_variant, downstream_gene_variant
rs11545482	2	70315987	C	T	0.0207986	-0.101387	0.0166705	36.9884	8.92506	1.18834e-09	-6.08182	IGF1	PCBP1, PCBP1-AS1, AC016700.2	3_prime_UTR_variant, upstream_gene_variant
rs11563232	2	234747407	G	A	0.00957961	-0.165231	0.0249116	43.9927	10.482	3.2961e-11	-6.63269	TBIL	HJURP	intron_variant, downstream_gene_variant, intron_variant&NMD_transcript_variant
rs115640879	2	28268742	C	T	0.0599137	0.0615238	0.0102054	36.3435	8.78139	1.65428e-09	6.02855	TRIG	BRE	intron_variant
rs115700531	2	234424542	T	C	0.0168654	-0.109177	0.0187947	33.7439	8.20158	6.28666e-09	-5.80892	TBIL	USP40	intron_variant, upstream_gene_variant, downstream_gene_variant
rs116241540	2	234898763	G	A	0.0188862	-0.103067	0.0177408	33.7513	8.20324	6.26268e-09	-5.8096	TBIL	TRPM8	intron_variant, intron_variant&NMD_transcript_variant, intron_variant&non_coding_transcript_variant, downstream_gene_variant
rs116361102	2	27732845	G	A	0.0252232	0.0857071	0.0154038	30.9583	7.57901	2.63627e-08	5.56402	TRIG	GCKR	intron_variant, downstream_gene_variant
rs11688492	2	64865804	T	C	0.455182	-0.0329967	0.00456817	52.1742	12.2942	5.07925e-13	-7.22318	SHBG	SERTAD2	intron_variant, intron_variant&non_coding_transcript_variant
rs11897825	2	21694451	A	G	0.440853	0.0271475	0.00490211	30.6686	7.51417	3.06077e-08	5.53792	APOB	AC067959.1, AC011752.1	intron_variant&non_coding_transcript_variant
rs12053445	2	234717448	T	G	0.457942	-0.0568542	0.00484222	137.86	31.1067	7.82168e-32	-11.7414	TBIL	MROH2A	intron_variant
rs12233112	2	73931764	A	G	0.36893	-0.0233998	0.00422658	30.6513	7.51029	3.08823e-08	-5.53634	CREA	AC092653.5	upstream_gene_variant
rs1234396	2	148785781	T	C	0.493701	0.0236654	0.00408373	33.5827	8.16559	6.82983e-09	5.79505	CREA	MBD5	intron_variant, intron_variant&non_coding_transcript_variant, downstream_gene_variant
rs12466350	2	25239969	T	C	0.491218	0.0381193	0.00506403	56.6628	13.2862	5.17369e-14	7.52746	BMI	DNAJC27-AS1	intron_variant&non_coding_transcript_variant
rs12471546	2	234576635	A	T	0.0102325	-0.182292	0.0240985	57.2215	13.4096	3.89404e-14	-7.56445	TBIL	UGT1A10, UGT1A9, UGT1A8	intron_variant, upstream_gene_variant
rs12474441	2	234678668	T	G	0.0189812	-0.172384	0.0176658	95.2199	21.7686	1.70373e-22	-9.75806	TBIL	UGT1A6, UGT1A1, UGT1A10, UGT1A9, UGT1A8, UGT1A4, UGT1A5, UGT1A7, UGT1A3	intron_variant, 3_prime_UTR_variant, downstream_gene_variant, intron_variant&NMD_transcript_variant
rs12991930	2	27576652	T	C	0.0556849	0.0811912	0.010629	58.3492	13.6586	2.19483e-14	7.63865	TRIG	GTF3C2, AC074117.10	intron_variant, upstream_gene_variant
rs12995095	2	234876371	G	A	0.151963	0.036968	0.0067281	30.1904	7.4071	3.91652e-08	5.49457	TBIL	TRPM8	intron_variant, intron_variant&NMD_transcript_variant, upstream_gene_variant, intron_variant&non_coding_transcript_variant
rs13002340	2	234234959	A	G	0.491592	0.0694691	0.00484731	205.391	45.8565	1.39155e-46	14.3315	TBIL	SAG	intron_variant, intron_variant&non_coding_transcript_variant, intron_variant&NMD_transcript_variant, downstream_gene_variant, upstream_gene_variant
rs13011156	2	234171812	A	G	0.0541428	0.0944991	0.0106377	78.9149	18.1881	6.48485e-19	8.88341	TBIL	ATG16L1	intron_variant, synonymous_variant, 3_prime_UTR_variant&NMD_transcript_variant, 5_prime_UTR_variant, non_coding_transcript_exon_variant, upstream_gene_variant
rs13013419	2	148575688	C	T	0.498188	-0.0248461	0.00407753	37.1296	8.9565	1.10535e-09	-6.09342	CREA	.	intergenic_variant
rs13013484	2	27988821	A	G	0.273082	-0.031755	0.0054469	33.988	8.25607	5.54536e-09	-5.82992	TRIG	.	intergenic_variant
rs13394291	2	234501740	T	C	0.0322543	-0.226611	0.0136442	275.846	61.219	6.03949e-62	-16.6086	TBIL	.	intergenic_variant
rs13421820	2	234886430	T	C	0.00804565	0.198339	0.0270831	53.6318	12.6165	2.41824e-13	7.32335	TBIL	TRPM8	intron_variant, upstream_gene_variant, intron_variant&NMD_transcript_variant, intron_variant&non_coding_transcript_variant
rs13430620	2	169768891	A	C	0.0455032	-0.0913353	0.0113999	64.1906	14.9471	1.12954e-15	-8.01194	HBA1C	G6PC2, SPC25	downstream_gene_variant, intron_variant, intron_variant&non_coding_transcript_variant
rs13430620	2	169768891	A	C	0.0455032	-0.0930181	0.0120439	59.6487	13.9454	1.13397e-14	-7.72325	GLUC	G6PC2, SPC25	downstream_gene_variant, intron_variant, intron_variant&non_coding_transcript_variant
rs139257330	2	234643807	A	C	0.0281671	0.50373	0.0146298	1185.55	259.074	8.43335e-260	34.4318	TBIL	UGT1A6, UGT1A10, UGT1A9, UGT1A4, UGT1A5, UGT1A7, UGT1A8, UGT1A3, AC114812.9	intron_variant, intron_variant&NMD_transcript_variant, intron_variant&non_coding_transcript_variant, upstream_gene_variant
rs141571693	2	234390610	G	T	0.0122105	0.430357	0.0220207	381.941	84.3276	4.70327e-85	19.5433	TBIL	USP40	intron_variant, downstream_gene_variant, upstream_gene_variant, intron_variant&non_coding_transcript_variant
rs144621281	2	234695250	A	G	0.0105964	-0.262838	0.0236887	123.111	27.8799	1.31856e-28	-11.0955	TBIL	MROH2A	intron_variant, intron_variant&non_coding_transcript_variant
rs145966524	2	234356244	C	T	0.0383007	-0.129543	0.0126269	105.253	23.9687	1.07473e-24	-10.2593	TBIL	DGKD	intron_variant, intron_variant&NMD_transcript_variant, upstream_gene_variant, intron_variant&non_coding_transcript_variant
rs1500481	2	234702459	C	T	0.454585	-0.0499332	0.00485774	105.66	24.0578	8.75387e-25	-10.2791	TBIL	MROH2A	missense_variant, upstream_gene_variant, non_coding_transcript_exon_variant
rs1597944	2	234504098	T	C	0.469877	-0.287978	0.00482747	3558.6	774.614	0	-59.654	TBIL	.	intergenic_variant
rs16856115	2	169752190	G	A	0.0228986	0.092439	0.016836	30.1462	7.39721	4.00673e-08	5.49056	GLUC	SPC25	intron_variant, intron_variant&non_coding_transcript_variant
rs17862855	2	234573089	T	C	0.0138168	-0.192221	0.0207788	85.5779	19.6522	2.22741e-20	-9.25082	TBIL	UGT1A10, UGT1A8	intron_variant
rs17862876	2	234657512	G	T	0.017374	0.49338	0.0185037	710.962	155.908	1.23595e-156	26.6639	TBIL	UGT1A6, UGT1A10, UGT1A9, UGT1A4, UGT1A5, UGT1A7, UGT1A8, DNAJB3, UGT1A2P, UGT1A3, AC114812.10	intron_variant, intron_variant&NMD_transcript_variant, upstream_gene_variant, downstream_gene_variant, intron_variant&non_coding_transcript_variant
rs17863752	2	234500064	A	C	0.019908	-0.143383	0.0173449	68.3363	15.8606	1.37848e-16	-8.26658	TBIL	.	intergenic_variant
rs17863775	2	234579936	A	G	0.011881	-0.192292	0.022316	74.2486	17.1619	6.88811e-18	-8.61678	TBIL	UGT1A10, UGT1A9, UGT1A8	intron_variant, upstream_gene_variant
rs17863786	2	234607863	A	G	0.025656	-0.252875	0.0152904	273.511	60.7104	1.94805e-61	-16.5382	TBIL	UGT1A6, UGT1A10, UGT1A9, UGT1A7, UGT1A8, AC114812.8	intron_variant, intron_variant&non_coding_transcript_variant, intron_variant&NMD_transcript_variant
rs17863834	2	234802870	G	A	0.0118539	-0.151832	0.0223545	46.1312	10.9563	1.10586e-11	-6.79201	TBIL	.	intergenic_variant
rs17864771	2	234903755	T	G	0.0232602	0.0908721	0.0160398	32.0969	7.83366	1.4667e-08	5.66541	TBIL	TRPM8	intron_variant, intron_variant&NMD_transcript_variant, intron_variant&non_coding_transcript_variant
rs17866593	2	234930311	G	A	0.281555	0.0525653	0.00539951	94.7741	21.6708	2.13403e-22	9.7352	TBIL	TRPM8	downstream_gene_variant
rs17868322	2	234580494	G	A	0.0327587	0.486598	0.0135521	1289.22	281.604	2.48886e-282	35.9057	TBIL	UGT1A10, UGT1A9, UGT1A8	intron_variant, upstream_gene_variant
rs17868337	2	234639656	G	A	0.0238502	-0.196599	0.0157814	155.193	34.896	1.27057e-35	-12.4576	TBIL	UGT1A6, UGT1A10, UGT1A9, UGT1A4, UGT1A5, UGT1A7, UGT1A8, UGT1A3	intron_variant, intron_variant&NMD_transcript_variant, downstream_gene_variant, intron_variant&non_coding_transcript_variant
rs17868360	2	234729895	A	G	0.459156	0.0392175	0.00484689	65.4687	15.2288	5.90473e-16	8.09127	TBIL	MROH2A	intron_variant
rs181488881	2	234441900	C	T	0.0131243	-0.172991	0.0213063	65.9217	15.3286	4.69245e-16	-8.11924	TBIL	USP40	intron_variant, intron_variant&non_coding_transcript_variant
rs182860728	2	234332462	C	G	0.00978937	0.295016	0.0245056	144.931	32.6528	2.22433e-33	12.0387	TBIL	DGKD	intron_variant, intron_variant&non_coding_transcript_variant
rs1838209	2	26895947	G	A	0.397953	0.0262863	0.00477239	30.3381	7.44017	3.62936e-08	5.50799	SBP	AC015977.6	intron_variant&non_coding_transcript_variant
rs1869026	2	121341281	A	C	0.459352	0.0233905	0.0041988	31.0334	7.59581	2.53624e-08	5.57076	URT	.	intergenic_variant
rs189692848	2	234724704	C	T	0.0164987	0.251652	0.0190822	173.918	38.9864	1.03181e-39	13.1878	TBIL	MROH2A	intron_variant
rs193018729	2	234588587	T	A	0.0109401	0.490498	0.0233404	441.631	97.3205	4.78079e-98	21.015	TBIL	UGT1A10, UGT1A9, UGT1A7, UGT1A8	intron_variant, upstream_gene_variant
rs2276566	2	234395159	G	C	0.0991036	0.0593544	0.00808783	53.8569	12.6663	2.15625e-13	7.33873	TBIL	USP40	intron_variant, downstream_gene_variant, intron_variant&NMD_transcript_variant, upstream_gene_variant, intron_variant&non_coding_transcript_variant
rs2289476	2	234181556	C	A	0.0596644	0.0865603	0.0101938	72.105	16.6903	2.04033e-17	8.49147	TBIL	ATG16L1, SCARNA5	intron_variant, intron_variant&NMD_transcript_variant, upstream_gene_variant, intron_variant&non_coding_transcript_variant
rs2302154	2	234763137	T	C	0.0619821	0.0587197	0.00999042	34.5461	8.38063	4.16265e-09	5.8776	TBIL	HJURP	missense_variant, missense_variant&NMD_transcript_variant, upstream_gene_variant
rs2302698	2	169963429	A	G	0.4886	-0.028507	0.00471365	36.5754	8.83306	1.46872e-09	-6.04775	ALP	.	intergenic_variant
rs2305538	2	234376177	C	T	0.486872	-0.0462303	0.00504877	83.8457	19.2717	5.34934e-20	-9.15675	CAL	DGKD	intron_variant, intron_variant&NMD_transcript_variant, downstream_gene_variant
rs2305538	2	234376177	C	T	0.486872	0.0327677	0.0049163	44.4236	10.5776	2.64484e-11	6.66511	PHOS	DGKD	intron_variant, intron_variant&NMD_transcript_variant, downstream_gene_variant
rs2305538	2	234376177	C	T	0.486872	0.141113	0.00484012	849.999	186.138	7.2778e-187	29.1549	TBIL	DGKD	intron_variant, intron_variant&NMD_transcript_variant, downstream_gene_variant
rs2602372	2	234553314	A	C	0.0283531	0.504615	0.0145679	1199.85	262.182	6.57658e-263	34.6388	TBIL	UGT1A10, UGT1A8, UGT1A13P	intron_variant, upstream_gene_variant
rs2602381	2	234584324	C	T	0.455745	-0.375572	0.00483632	6030.52	1311.5	0	-77.6566	TBIL	UGT1A10, UGT1A9, UGT1A8	intron_variant
rs2673127	2	227134379	C	T	0.496906	-0.0249732	0.00457038	29.8568	7.33239	4.65168e-08	-5.46414	APOA	.	intergenic_variant
rs2673127	2	227134379	C	T	0.496906	-0.0314296	0.00451355	48.4888	11.4786	3.322e-12	-6.96339	HDL	.	intergenic_variant
rs2673127	2	227134379	C	T	0.496906	0.029181	0.00482802	36.531	8.82315	1.50262e-09	6.04409	TRIG	.	intergenic_variant
rs2699616	2	100709352	C	T	0.499795	0.0310807	0.00506185	37.7019	9.08395	8.24233e-10	6.14019	TPROT	AFF3	intron_variant
rs28381983	2	27804432	T	C	0.4811	0.0261614	0.00465575	31.575	7.71696	1.91885e-08	5.61916	GGT	ZNF512, AC074091.1, C2orf16, RP11-158I13.2	upstream_gene_variant, downstream_gene_variant, missense_variant
rs2971860	2	234383797	C	A	0.309721	0.0331676	0.00545513	36.9673	8.92035	1.2013e-09	6.08008	CAL	USP40, DGKD	downstream_gene_variant
rs2971860	2	234383797	C	A	0.309721	0.0480663	0.00522969	84.4754	19.41	3.89045e-20	9.19104	TBIL	USP40, DGKD	downstream_gene_variant
rs312030	2	21462743	C	T	0.0760552	-0.0636449	0.00918611	48.0025	11.3709	4.25696e-12	-6.92838	APOB	AC067959.1	intron_variant&non_coding_transcript_variant
rs34082659	2	234676409	C	T	0.0131608	0.246516	0.0212992	133.956	30.253	5.5847e-31	11.574	TBIL	UGT1A6, UGT1A1, UGT1A10, UGT1A9, UGT1A8, UGT1A4, UGT1A5, UGT1A7, UGT1A3	intron_variant, intron_variant&NMD_transcript_variant, downstream_gene_variant
rs34707303	2	234585125	C	T	0.0100905	-0.234852	0.0242661	93.6675	21.428	3.7325e-22	-9.67819	TBIL	UGT1A10, UGT1A9, UGT1A8	intron_variant
rs3769891	2	165602181	A	G	0.253243	-0.0311542	0.00558918	31.0698	7.60396	2.48909e-08	-5.57402	TRIG	COBLL1	intron_variant, intron_variant&non_coding_transcript_variant, intron_variant&NMD_transcript_variant
rs3770582	2	169819824	G	A	0.39714	0.0313558	0.00513163	37.3358	9.00243	9.9442e-10	6.1103	GLUC	ABCB11	intron_variant, intron_variant&NMD_transcript_variant
rs3806598	2	234579892	A	C	0.0216919	0.350401	0.0165869	446.27	98.3301	4.67627e-99	21.1252	TBIL	UGT1A10, UGT1A9, UGT1A8	intron_variant, upstream_gene_variant
rs3965793	2	234457900	A	T	0.305453	0.0333378	0.00549249	36.8412	8.89227	1.28153e-09	6.06971	CAL	USP40, RP11-289A15.1	intron_variant, downstream_gene_variant
rs3965793	2	234457900	A	T	0.305453	0.0510718	0.0052655	94.0768	21.5178	3.03529e-22	9.69933	TBIL	USP40, RP11-289A15.1	intron_variant, downstream_gene_variant
rs4076834	2	44081627	T	G	0.0636274	-0.0861212	0.0101186	72.4406	16.7641	1.72147e-17	-8.51118	LDL	ABCG8	intron_variant
rs4076834	2	44081627	T	G	0.0636274	-0.076904	0.00997063	59.4912	13.9106	1.22857e-14	-7.71305	APOB	ABCG8	intron_variant
rs4076834	2	44081627	T	G	0.0636274	-0.0791287	0.0101399	60.8977	14.221	6.01174e-15	-7.8037	CHO	ABCG8	intron_variant
rs4148768	2	169887154	G	A	0.0806174	0.051254	0.00864597	35.1422	8.51358	3.06493e-09	5.92808	ALP	ABCB11	intron_variant
rs4233633	2	234619937	G	C	0.120225	0.112312	0.00746512	226.35	50.4287	3.72649e-51	15.0449	TBIL	UGT1A6, UGT1A10, UGT1A9, UGT1A5, UGT1A7, UGT1A8, AC114812.8	intron_variant, upstream_gene_variant, intron_variant&NMD_transcript_variant, intron_variant&non_coding_transcript_variant
rs4663344	2	234867009	G	T	0.103799	-0.0938487	0.00794633	139.484	31.4619	3.45223e-32	-11.8103	TBIL	TRPM8, AC005538.5	intron_variant, intron_variant&NMD_transcript_variant, upstream_gene_variant, intron_variant&non_coding_transcript_variant
rs4663967	2	234653184	A	C	0.434873	0.531558	0.00488926	11819.9	2568.8	0	108.72	TBIL	UGT1A6, UGT1A10, UGT1A9, UGT1A4, UGT1A5, UGT1A7, UGT1A8, DNAJB3, UGT1A2P, UGT1A3, AC114812.9	intron_variant, intron_variant&NMD_transcript_variant, upstream_gene_variant, intron_variant&non_coding_transcript_variant, downstream_gene_variant
rs4671611	2	64967175	A	G	0.386087	0.0290141	0.00467667	38.4898	9.25933	5.50389e-10	6.20401	SHBG	SERTAD2	intron_variant&non_coding_transcript_variant
rs4672255	2	58898663	G	A	0.427016	-0.0281818	0.00511149	30.3977	7.45353	3.51941e-08	-5.51342	BMI	LINC01122	intron_variant&non_coding_transcript_variant
rs4852957	2	73872698	C	A	0.393916	-0.0262399	0.00418078	39.392	9.46003	3.46713e-10	-6.27632	CREA	NAT8, ALMS1P	upstream_gene_variant, intron_variant&non_coding_transcript_variant
rs491443	2	169769027	A	C	0.457757	0.0298419	0.00477872	38.9968	9.37213	4.24492e-10	6.24475	HBA1C	G6PC2, SPC25	downstream_gene_variant, intron_variant, intron_variant&non_coding_transcript_variant
rs491443	2	169769027	A	C	0.457757	0.0524841	0.00504866	108.069	24.5858	2.59537e-25	10.3956	GLUC	G6PC2, SPC25	downstream_gene_variant, intron_variant, intron_variant&non_coding_transcript_variant
rs524586	2	169737851	G	A	0.496874	-0.0297173	0.00502428	34.9842	8.47836	3.32384e-09	-5.91474	GLUC	SPC25	intron_variant, intron_variant&non_coding_transcript_variant
rs532039315	2	234219411	C	T	0.012675	-0.163558	0.0215944	57.3668	13.4417	3.6166e-14	-7.57409	TBIL	SAG	intron_variant, intron_variant&non_coding_transcript_variant, intron_variant&NMD_transcript_variant
rs540948010	2	234489356	T	A	0.0324595	-0.173304	0.0137901	157.936	35.4954	3.19595e-36	-12.5673	TBIL	UGT1A12P	upstream_gene_variant
rs547291485	2	234620030	G	C	0.00955418	-0.252368	0.0249788	102.077	23.2724	5.34072e-24	-10.1033	TBIL	UGT1A6, UGT1A10, UGT1A9, UGT1A5, UGT1A7, UGT1A8, AC114812.8	intron_variant, upstream_gene_variant, intron_variant&NMD_transcript_variant, intron_variant&non_coding_transcript_variant
rs55781538	2	234637625	T	C	0.0216528	0.509782	0.0166769	934.413	204.489	3.2434e-205	30.5682	TBIL	UGT1A6, UGT1A10, UGT1A9, UGT1A4, UGT1A5, UGT1A7, UGT1A8, UGT1A3	intron_variant, intron_variant&NMD_transcript_variant, intron_variant&non_coding_transcript_variant, upstream_gene_variant
rs55891750	2	234660486	C	T	0.0173302	0.496043	0.0185569	714.545	156.687	2.05589e-157	26.7309	TBIL	UGT1A6, UGT1A10, UGT1A9, UGT1A4, UGT1A5, UGT1A7, UGT1A8, AC114812.5, UGT1A2P, UGT1A3, AC114812.10	intron_variant, downstream_gene_variant, intron_variant&NMD_transcript_variant, intron_variant&non_coding_transcript_variant
rs55921927	2	43848935	A	C	0.143724	-0.045661	0.0068003	45.0852	10.7243	1.88669e-11	-6.71456	HBA1C	Y_RNA	upstream_gene_variant
rs56341434	2	113868990	C	T	0.492631	-0.0362626	0.0049268	54.1738	12.7363	1.83527e-13	-7.36027	CRP	IL1RN	intron_variant, intron_variant&non_coding_transcript_variant
rs61591958	2	233966722	T	C	0.0329584	0.077947	0.0135417	33.1324	8.06503	8.60934e-09	5.75607	TBIL	INPP5D	intron_variant, intron_variant&non_coding_transcript_variant
rs62104180	2	466003	G	A	0.0501417	-0.0807903	0.0115733	48.7312	11.5323	2.93562e-12	-6.98075	BMI	.	intergenic_variant
rs62191951	2	234699366	T	C	0.0567672	0.118123	0.0104587	127.559	28.8533	1.40185e-29	11.2942	TBIL	MROH2A	intron_variant, intron_variant&non_coding_transcript_variant
rs62192269	2	234732375	T	A	0.00990484	0.146876	0.0245145	35.8966	8.68179	2.0807e-09	5.99139	TBIL	MROH2A	intron_variant, upstream_gene_variant
rs6724525	2	169800797	G	A	0.00822011	0.165006	0.0278461	35.1132	8.50711	3.11093e-09	5.92564	GLUC	ABCB11	intron_variant, intron_variant&NMD_transcript_variant
rs6739502	2	21527036	A	G	0.48704	-0.0299817	0.00488864	37.6129	9.06413	8.6272e-10	-6.13293	APOB	AC067959.1	intron_variant&non_coding_transcript_variant
rs6753889	2	234801198	C	T	0.0173756	-0.101332	0.0185324	29.8973	7.34146	4.55554e-08	-5.46783	TBIL	.	intergenic_variant
rs71441063	2	27444546	T	C	0.0613514	0.0807408	0.0100209	64.919	15.1077	7.80369e-16	8.05724	TRIG	CAD, ATRAID	intron_variant, downstream_gene_variant, upstream_gene_variant
rs71441090	2	27927968	G	A	0.0583802	0.0712566	0.0103474	47.4226	11.2425	5.72137e-12	6.88643	TRIG	AC074091.13	downstream_gene_variant
rs715049	2	217657102	T	C	0.496225	-0.0248337	0.00408855	36.893	8.90381	1.24793e-09	-6.07396	CREA	RNA5SP120, AC007563.5	downstream_gene_variant, intron_variant&non_coding_transcript_variant
rs728672	2	234891096	C	A	0.486623	-0.032338	0.00483898	44.6601	10.6301	2.34369e-11	-6.68281	TBIL	TRPM8	intron_variant, intron_variant&NMD_transcript_variant, intron_variant&non_coding_transcript_variant
rs75507430	2	234518317	C	T	0.0207858	-0.268175	0.0169699	249.736	55.5279	2.96551e-56	-15.803	TBIL	.	intergenic_variant
rs75528846	2	234502127	G	A	0.0315268	-0.102217	0.0138495	54.4723	12.8023	1.57652e-13	-7.38056	TBIL	.	intergenic_variant
rs75656635	2	234339792	A	G	0.040351	0.294244	0.0122916	573.059	125.916	1.21339e-126	23.9386	TBIL	DGKD	intron_variant, intron_variant&non_coding_transcript_variant, upstream_gene_variant
rs7571337	2	234566418	C	T	0.492778	0.395997	0.00484688	6675.12	1451.49	0	81.7014	TBIL	UGT1A10, UGT1A8	intron_variant
rs7577262	2	234818869	G	A	0.10819	0.051335	0.00777553	43.588	10.3922	4.05322e-11	6.60212	TBIL	.	intergenic_variant
rs7580081	2	25097072	G	C	0.450327	0.0331309	0.00510949	42.0447	10.0496	8.92072e-11	6.48419	BMI	ADCY3	intron_variant, upstream_gene_variant
rs75820995	2	234457366	T	G	0.0259754	0.384426	0.015199	639.726	140.417	3.82825e-141	25.2928	TBIL	USP40, RP11-289A15.1	intron_variant, downstream_gene_variant
rs758277	2	234837737	C	T	0.431447	0.0291195	0.00489505	35.3878	8.56837	2.70166e-09	5.94876	TBIL	TRPM8	intron_variant, upstream_gene_variant, intron_variant&NMD_transcript_variant
rs7583126	2	21100867	A	G	0.133289	-0.0497542	0.00728003	46.7082	11.0842	8.23759e-12	-6.83434	LDL	.	intergenic_variant
rs7583126	2	21100867	A	G	0.133289	-0.0627368	0.00717359	76.4843	17.6537	2.21973e-18	-8.74552	APOB	.	intergenic_variant
rs7583126	2	21100867	A	G	0.133289	-0.0411174	0.00729537	31.7655	7.75957	1.73952e-08	-5.6361	CHO	.	intergenic_variant
rs7584099	2	148478336	A	G	0.461488	-0.023965	0.00409087	34.3182	8.32977	4.67983e-09	-5.85817	CREA	.	intergenic_variant
rs759173	2	234704690	C	T	0.16192	-0.0476519	0.00655988	52.7677	12.4255	3.75405e-13	-7.26414	TBIL	MROH2A	splice_region_variant&synonymous_variant, upstream_gene_variant, downstream_gene_variant
rs7599598	2	97351840	A	G	0.427676	-0.0349878	0.00509589	47.1403	11.1799	6.60846e-12	-6.86589	CAL	FER1L5	non_coding_transcript_exon_variant
rs76372731	2	169747216	T	C	0.0210631	-0.11247	0.0174985	41.3117	9.88675	1.29793e-10	-6.42741	GLUC	SPC25	upstream_gene_variant, intron_variant, intron_variant&non_coding_transcript_variant
rs76898938	2	27539201	G	A	0.0259321	0.0857122	0.0151742	31.9061	7.791	1.61808e-08	5.64855	TRIG	MPV17	intron_variant, intron_variant&NMD_transcript_variant, upstream_gene_variant, downstream_gene_variant, intron_variant&non_coding_transcript_variant
rs79566441	2	234760729	C	T	0.0183098	-0.150177	0.0180033	69.5831	16.1351	7.32656e-17	-8.34164	TBIL	HJURP	intron_variant, intron_variant&NMD_transcript_variant
rs838563	2	234399121	G	A	0.034436	0.107689	0.013226	66.2952	15.4109	3.8824e-16	8.14222	TBIL	USP40	intron_variant, downstream_gene_variant, intron_variant&NMD_transcript_variant, upstream_gene_variant, intron_variant&non_coding_transcript_variant
rs952275	2	21221399	G	T	0.479439	-0.0735441	0.00496262	219.621	48.961	1.09396e-49	-14.8196	LDL	APOB, RP11-116D2.1	downstream_gene_variant
rs952275	2	21221399	G	T	0.479439	0.0300489	0.00460692	42.5438	10.1604	6.91194e-11	6.52256	APOA	APOB, RP11-116D2.1	downstream_gene_variant
rs952275	2	21221399	G	T	0.479439	-0.0946869	0.00489006	374.931	82.8014	1.57979e-83	-19.3631	APOB	APOB, RP11-116D2.1	downstream_gene_variant
rs952275	2	21221399	G	T	0.479439	-0.0613998	0.00497308	152.435	34.2932	5.09096e-35	-12.3464	CHO	APOB, RP11-116D2.1	downstream_gene_variant
rs952275	2	21221399	G	T	0.479439	-0.028904	0.00486662	35.2747	8.54313	2.86332e-09	-5.93924	TRIG	APOB, RP11-116D2.1	downstream_gene_variant
rs9678093	2	73691144	A	C	0.390126	-0.0281926	0.00419596	45.1447	10.7376	1.82978e-11	-6.71899	CREA	ALMS1, ALMS1-IT1	intron_variant, downstream_gene_variant, intron_variant&NMD_transcript_variant, intron_variant&non_coding_transcript_variant
rs112212287	3	45919528	G	A	0.0120083	0.134394	0.0222284	36.5545	8.8284	1.48457e-09	6.04605	AST	LZTFL1	intron_variant&NMD_transcript_variant, intron_variant&non_coding_transcript_variant, intron_variant
rs1127343	3	122128394	A	G	0.418108	0.0569582	0.00511305	124.094	28.0951	8.03341e-29	11.1398	CAL	FAM162A, WDR5B	intron_variant, downstream_gene_variant
rs1131535	3	172224075	C	T	0.437068	-0.0290133	0.00483252	36.0452	8.71492	1.92788e-09	-6.00376	IGF1	TNFSF10	3_prime_UTR_variant, downstream_gene_variant
rs11714515	3	58410431	A	G	0.468123	0.0371019	0.00484681	58.5975	13.7134	1.93464e-14	7.65491	AST	PDHB, PXK, RP11-802O23.3	downstream_gene_variant, intron_variant, intron_variant&NMD_transcript_variant, upstream_gene_variant
rs13317803	3	172177764	T	C	0.496098	0.0350772	0.00477717	53.9147	12.6791	2.09363e-13	7.34267	IGF1	.	intergenic_variant
rs139632291	3	121680827	T	G	0.0131069	0.142985	0.0221916	41.5149	9.9319	1.16977e-10	6.4432	CAL	.	intergenic_variant
rs147969266	3	122285301	C	T	0.00983186	-0.140812	0.0256469	30.1448	7.39689	4.00968e-08	-5.49041	CAL	DTX3L, PARP9	intron_variant, upstream_gene_variant
rs1584063	3	12266855	G	A	0.455475	-0.0348937	0.00477171	53.4743	12.5817	2.61999e-13	-7.31262	HBA1C	.	intergenic_variant
rs1915091	3	121832410	G	C	0.19238	-0.0371337	0.00642492	33.4042	8.12573	7.48635e-09	-5.77964	CAL	CD86	intron_variant
rs2518136	3	186337827	C	T	0.497854	-0.0359973	0.00504115	50.9894	12.0322	9.28539e-13	-7.14069	CAL	AHSG	intron_variant, downstream_gene_variant
rs34345884	3	49760431	G	C	0.0217073	0.0914116	0.0162884	31.4952	7.69911	1.99936e-08	5.61207	HBA1C	GMPPB, AMIGO3, IP6K1, RNF123	missense_variant, upstream_gene_variant, downstream_gene_variant, non_coding_transcript_exon_variant, 5_prime_UTR_variant
rs34371877	3	122001746	C	T	0.0118773	0.192568	0.0233728	67.8809	15.7603	1.7366e-16	8.23898	CAL	CASR, AC068754.1	intron_variant, downstream_gene_variant
rs34801630	3	46007846	C	T	0.0126473	0.124466	0.0216804	32.9587	8.02623	9.41391e-09	5.74095	AST	FYCO1	missense_variant
rs4387990	3	58516383	G	A	0.468175	0.0300872	0.00483703	38.6907	9.30401	4.96581e-10	6.22018	AST	ACOX2	intron_variant, upstream_gene_variant, downstream_gene_variant, intron_variant&NMD_transcript_variant
rs451900	3	64793661	C	T	0.492573	0.0346058	0.00487696	50.35	11.8907	1.28617e-12	7.09577	URA	ADAMTS9-AS2	intron_variant&non_coding_transcript_variant
rs4681678	3	58327899	A	T	0.460614	-0.0268063	0.00487241	30.2682	7.42453	3.76244e-08	-5.50165	AST	PXK	intron_variant, intron_variant&NMD_transcript_variant
rs4894806	3	171818000	A	G	0.429261	-0.0269868	0.00480165	31.5881	7.7199	1.9059e-08	-5.62032	HBA1C	FNDC3B	intron_variant, intron_variant&non_coding_transcript_variant
rs5396	3	170744815	T	C	0.27747	-0.0386486	0.00530199	53.1362	12.507	3.11172e-13	-7.28945	HBA1C	SLC2A2	upstream_gene_variant
rs5396	3	170744815	T	C	0.27747	0.0327099	0.00519483	39.6474	9.51682	3.04215e-10	6.29663	GGT	SLC2A2	upstream_gene_variant
rs5396	3	170744815	T	C	0.27747	-0.0633907	0.00559758	128.248	29.004	9.90832e-30	-11.3247	GLUC	SLC2A2	upstream_gene_variant
rs562228304	3	121900883	G	A	0.00986653	0.176271	0.0256408	47.2603	11.2065	6.21584e-12	6.87463	CAL	CASR	upstream_gene_variant
rs62281226	3	172191689	G	T	0.472256	-0.0286435	0.00480873	35.4806	8.58906	2.57597e-09	-5.95656	IGF1	.	intergenic_variant
rs6440658	3	149962014	A	G	0.473233	-0.0249669	0.00456298	29.9388	7.35075	4.45913e-08	-5.47162	SHBG	RP11-167H9.6	downstream_gene_variant
rs6445967	3	58282576	T	C	0.322747	-0.0358958	0.00517506	48.1122	11.3952	4.02532e-12	-6.93631	AST	ABHD6	downstream_gene_variant
rs6768471	3	121979704	G	A	0.357353	-0.067261	0.0052977	161.195	36.2074	6.20297e-37	-12.6963	CAL	CASR	intron_variant, downstream_gene_variant
rs6792686	3	170664588	A	G	0.394482	-0.026566	0.00485449	29.9478	7.35278	4.43833e-08	-5.47246	HBA1C	.	intergenic_variant
rs6792686	3	170664588	A	G	0.394482	-0.0519899	0.00512513	102.903	23.4535	3.51965e-24	-10.1441	GLUC	.	intergenic_variant
rs6794886	3	123085359	C	T	0.489858	-0.0311885	0.00475645	42.9955	10.2607	5.48656e-11	-6.5571	HBA1C	ADCY5	intron_variant, intron_variant&non_coding_transcript_variant, intron_variant&NMD_transcript_variant
rs711972	3	136110018	C	T	0.433207	-0.025794	0.00458684	31.6234	7.72778	1.87163e-08	-5.62348	SHBG	STAG1	intron_variant, intron_variant&NMD_transcript_variant
rs7428430	3	50174184	C	T	0.483941	-0.0316951	0.00505879	39.2547	9.4295	3.71963e-10	-6.26535	BMI	RP11-493K19.3	intron_variant&non_coding_transcript_variant
rs74729891	3	121933063	C	A	0.0155067	-0.12473	0.0204244	37.2948	8.99329	1.01557e-09	-6.10691	CAL	CASR	intron_variant
rs75267400	3	122092831	T	C	0.0106111	-0.141535	0.0246651	32.9278	8.01934	9.56445e-09	-5.73827	CAL	CCDC58	intron_variant, upstream_gene_variant, intron_variant&non_coding_transcript_variant
rs7612244	3	122300452	T	C	0.499241	0.0307158	0.00507137	36.6838	8.85721	1.38928e-09	6.05671	CAL	PARP15	intron_variant
rs7621308	3	136275528	G	A	0.484528	-0.0235586	0.00424907	30.7404	7.53023	2.94965e-08	-5.54441	TBIL	STAG1	intron_variant, intron_variant&non_coding_transcript_variant, intron_variant&NMD_transcript_variant
rs856662	3	136668625	C	T	0.312243	0.0350717	0.00488568	51.5305	12.1519	7.04855e-13	7.17847	SHBG	NCK1, IL20RB	downstream_gene_variant, 3_prime_UTR_variant, intron_variant&non_coding_transcript_variant
rs856662	3	136668625	C	T	0.312243	0.0302525	0.004547	44.2663	10.5427	2.86616e-11	6.65329	TBIL	NCK1, IL20RB	downstream_gene_variant, 3_prime_UTR_variant, intron_variant&non_coding_transcript_variant
rs9311400	3	4764171	A	G	0.487719	-0.0267845	0.0046628	32.9969	8.03477	9.2306e-09	-5.7443	GGT	ITPR1	intron_variant, upstream_gene_variant, intron_variant&non_coding_transcript_variant
rs9821675	3	49902544	G	A	0.488851	-0.0333962	0.0050479	43.7696	10.4325	3.69403e-11	-6.61586	BMI	CAMKV, RN7SL217P	intron_variant, intron_variant&NMD_transcript_variant, upstream_gene_variant, intron_variant&non_coding_transcript_variant
rs9834975	3	122117663	A	T	0.443925	-0.0595271	0.00510018	136.225	30.7493	1.78115e-31	-11.6716	CAL	FAM162A	intron_variant
rs10007119	4	3473066	A	G	0.420653	0.0350727	0.00503784	48.4674	11.4739	3.35815e-12	6.96185	ALB	DOK7	intron_variant, intron_variant&non_coding_transcript_variant
rs10007119	4	3473066	A	G	0.420653	0.0319146	0.00460514	48.0279	11.3765	4.20243e-12	6.93021	SHBG	DOK7	intron_variant, intron_variant&non_coding_transcript_variant
rs10016496	4	10477505	G	A	0.485592	-0.0542536	0.0043174	157.911	35.4898	3.23743e-36	-12.5663	URT	RP11-136I13.2	downstream_gene_variant
rs10022720	4	72743549	T	C	0.422719	0.040884	0.00511944	63.7769	14.8559	1.39348e-15	7.98603	VITD	.	intergenic_variant
rs10025456	4	10140259	T	C	0.492589	0.0645908	0.00432962	222.557	49.6013	2.50438e-50	14.9184	URT	RP11-480G3.1	downstream_gene_variant
rs10516194	4	9916209	T	C	0.0149465	-0.27639	0.0178445	239.904	53.3843	4.12762e-54	-15.4888	URT	SLC2A9	intron_variant, intron_variant&non_coding_transcript_variant
rs10805346	4	9920347	T	C	0.428137	-0.215145	0.00435093	2445.11	532.74	0	-49.448	URT	SLC2A9, RP13-560N11.1	intron_variant, upstream_gene_variant, intron_variant&non_coding_transcript_variant
rs10937926	4	3469341	G	A	0.480223	0.0339206	0.00499954	46.0328	10.9344	1.16305e-11	6.78474	ALB	DOK7	intron_variant, intron_variant&non_coding_transcript_variant
rs10937986	4	72792521	C	T	0.495571	-0.0671333	0.00506223	175.87	39.4128	3.86545e-40	-13.2616	VITD	.	intergenic_variant
rs10938008	4	73065084	A	C	0.344529	-0.0392488	0.00531436	54.5445	12.8182	1.51985e-13	-7.38542	VITD	.	intergenic_variant
rs10939741	4	10155346	C	T	0.0888536	0.0552186	0.00759335	52.8815	12.4507	3.54242e-13	7.27197	URT	.	intergenic_variant
rs11097396	4	77440333	C	G	0.246674	-0.0321388	0.004715	46.4618	11.0295	9.34329e-12	-6.81629	CREA	SHROOM3	intron_variant, intron_variant&non_coding_transcript_variant
rs111921266	4	9591246	G	A	0.157161	-0.101154	0.00590681	293.262	65.0142	9.67832e-66	-17.125	URT	.	intergenic_variant
rs111928356	4	10405953	A	G	0.0155577	-0.273062	0.0174307	245.412	54.5853	2.59836e-55	-15.6656	URT	.	intergenic_variant
rs111978854	4	72642367	C	T	0.037847	0.0901166	0.0132878	45.9943	10.9259	1.18604e-11	6.78191	VITD	GC	intron_variant, intron_variant&NMD_transcript_variant
rs112583696	4	9401851	G	T	0.0285158	0.0978385	0.0129764	56.8478	13.3271	4.70869e-14	7.53973	URT	RP11-1396O13.14	intron_variant&non_coding_transcript_variant
rs112783824	4	10544105	C	T	0.00873832	-0.219645	0.0232254	89.4364	20.4994	3.16665e-21	-9.4571	URT	CLNK	intron_variant
rs112908979	4	10268958	G	C	0.0280449	0.0874249	0.0131518	44.1877	10.5253	2.98332e-11	6.64737	URT	AC006499.4	downstream_gene_variant
rs113209890	4	73236243	C	T	0.103884	-0.0488205	0.00825238	34.9981	8.48146	3.3002e-09	-5.91593	VITD	ADAMTS3	intron_variant
rs114056737	4	9991519	C	T	0.0176758	0.0972113	0.0164248	35.0293	8.48841	3.24781e-09	5.91857	URT	SLC2A9	intron_variant, intron_variant&non_coding_transcript_variant
rs114204813	4	73110572	A	G	0.0224329	-0.0950279	0.0169541	31.4161	7.68141	2.08252e-08	-5.60501	VITD	.	intergenic_variant
rs114323258	4	88661354	C	A	0.0357846	0.0950298	0.0116751	66.2525	15.4015	3.96735e-16	8.13953	URT	Y_RNA	downstream_gene_variant
rs114766978	4	10184351	C	T	0.0113486	-0.204926	0.0203948	100.961	23.0278	9.37994e-24	-10.048	URT	.	intergenic_variant
rs114847096	4	10022161	A	C	0.0138074	0.133108	0.0184458	52.0732	12.2719	5.34687e-13	7.21617	URT	SLC2A9	intron_variant, intron_variant&non_coding_transcript_variant, upstream_gene_variant
rs115050662	4	10063573	C	T	0.0102031	-0.123334	0.0214588	33.0336	8.04298	9.05774e-09	-5.74748	URT	.	intergenic_variant
rs115079764	4	9684785	A	G	0.0361381	0.0669607	0.0115289	33.7337	8.19931	6.31961e-09	5.80807	URT	.	intergenic_variant
rs115099116	4	10124481	G	A	0.0264646	0.100154	0.0133989	55.8726	13.1117	7.73215e-14	7.47479	URT	.	intergenic_variant
rs115793604	4	10048667	T	C	0.0193555	0.101747	0.0156856	42.0766	10.0567	8.77607e-11	6.48665	URT	SLC2A9	intron_variant
rs115888461	4	10128864	C	A	0.0176755	0.0897386	0.0164264	29.8452	7.3298	4.67951e-08	5.46307	URT	.	intergenic_variant
rs116658821	4	9931161	T	C	0.0164966	-0.127777	0.016904	57.1381	13.3912	4.06256e-14	-7.55898	URT	SLC2A9	intron_variant, intron_variant&non_coding_transcript_variant
rs11722561	4	100088737	A	T	0.4582	0.0285801	0.00474212	36.3231	8.77684	1.67171e-09	6.02686	ALP	RP11-696N14.1	intron_variant&non_coding_transcript_variant
rs11722627	4	10256259	A	G	0.0957968	-0.204111	0.00732919	775.568	169.956	1.10662e-170	-27.8491	URT	AC006499.8, AC006499.5	downstream_gene_variant
rs11723591	4	9985398	A	T	0.481053	-0.190785	0.00432058	1949.86	425.15	0	-44.1573	URT	SLC2A9	intron_variant, intron_variant&non_coding_transcript_variant, downstream_gene_variant
rs11731759	4	9872456	G	C	0.0667155	0.0806625	0.0086177	87.6114	20.0987	7.9671e-21	9.3601	URT	SLC2A9	intron_variant, intron_variant&non_coding_transcript_variant
rs11731894	4	40583139	G	T	0.0826849	-0.0522226	0.00914847	32.5853	7.9428	1.14078e-08	-5.70834	CAL	RBM47	intron_variant, intron_variant&NMD_transcript_variant, intron_variant&non_coding_transcript_variant
rs11735662	4	145026126	C	T	0.0342258	-0.119586	0.0130767	83.6301	19.2243	5.96623e-20	-9.14497	HBA1C	GYPB, GYPA, RP11-673E1.4	intron_variant, downstream_gene_variant, intron_variant&non_coding_transcript_variant
rs11737588	4	10319007	G	A	0.0100628	-0.25646	0.0216746	140.003	31.5755	2.65766e-32	-11.8323	URT	.	intergenic_variant
rs12186220	4	72729569	T	C	0.0882397	-0.0615038	0.00889212	47.8401	11.335	4.62381e-12	-6.91666	VITD	.	intergenic_variant
rs12643735	4	9837858	G	A	0.195468	0.0324439	0.00544316	35.5274	8.59949	2.51484e-09	5.96049	URT	SLC2A9	intron_variant, intron_variant&non_coding_transcript_variant
rs1311621	4	100014018	T	C	0.454869	-0.0263563	0.00473858	30.9366	7.57416	2.66588e-08	-5.56207	ALP	ADH5, RP11-696N14.1	upstream_gene_variant, intron_variant&non_coding_transcript_variant
rs13122290	4	9933832	A	G	0.492487	-0.193518	0.00430644	2019.32	440.24	0	-44.9369	URT	SLC2A9	intron_variant, intron_variant&non_coding_transcript_variant
rs137874093	4	73101594	G	T	0.0234186	-0.128256	0.0168044	58.2519	13.6371	2.30622e-14	-7.63229	VITD	.	intergenic_variant
rs138371541	4	10128912	G	C	0.011143	-0.281945	0.0205046	189.071	42.2949	5.07107e-43	-13.7503	URT	.	intergenic_variant
rs138416405	4	9873822	T	C	0.0191018	0.097849	0.0157971	38.367	9.232	5.86138e-10	6.19411	URT	SLC2A9	intron_variant, intron_variant&non_coding_transcript_variant
rs139042212	4	10173258	C	T	0.0238792	0.108724	0.014135	59.1641	13.8385	1.45044e-14	7.69183	URT	AC006499.7	upstream_gene_variant
rs139539281	4	10081124	G	A	0.0108468	-0.288142	0.0207872	192.141	42.965	1.08393e-43	-13.8615	URT	WDR1, MIR3138	intron_variant, intron_variant&non_coding_transcript_variant, downstream_gene_variant, upstream_gene_variant
rs139854873	4	9852155	C	T	0.0189009	-0.0993596	0.0159349	38.8796	9.34605	4.50765e-10	-6.23535	URT	SLC2A9	intron_variant, intron_variant&non_coding_transcript_variant
rs139868816	4	72621004	C	T	0.0493879	-0.126775	0.0116819	117.771	26.7109	1.94581e-27	-10.8523	VITD	GC, RNA5SP163	intron_variant, downstream_gene_variant, upstream_gene_variant, intron_variant&non_coding_transcript_variant, intron_variant&NMD_transcript_variant
rs140159243	4	9751584	G	A	0.0174658	-0.122247	0.0165646	54.4643	12.8005	1.58307e-13	-7.38002	URT	OR7E35P	upstream_gene_variant
rs143790062	4	9967015	G	A	0.0133524	0.119536	0.0188435	40.2414	9.64891	2.24435e-10	6.34362	URT	SLC2A9	intron_variant, intron_variant&non_coding_transcript_variant
rs143826374	4	9841108	G	T	0.00834903	-0.266288	0.0237981	125.204	28.3379	4.59304e-29	-11.1895	URT	SLC2A9	intron_variant, intron_variant&non_coding_transcript_variant
rs145160523	4	10049182	G	A	0.0194423	0.0915925	0.0157151	33.9692	8.25189	5.59899e-09	5.82831	URT	SLC2A9	intron_variant
rs146017173	4	9946290	C	T	0.00811358	-0.285397	0.0241494	139.665	31.5016	3.15065e-32	-11.818	URT	SLC2A9	intron_variant, intron_variant&non_coding_transcript_variant
rs146062078	4	10848109	G	T	0.00950493	-0.169508	0.022237	58.1074	13.6052	2.48199e-14	-7.62279	URT	.	intergenic_variant
rs146505074	4	10183293	A	G	0.0108595	-0.281962	0.0207686	184.318	41.2572	5.53095e-42	-13.5764	URT	.	intergenic_variant
rs146624520	4	72559546	C	T	0.0124085	-0.130469	0.0228892	32.4905	7.92162	1.19779e-08	-5.70002	VITD	.	intergenic_variant
rs147031819	4	10108734	G	A	0.0123631	0.107561	0.0196147	30.0709	7.38036	4.16524e-08	5.48369	URT	WDR1	upstream_gene_variant, intron_variant, intron_variant&non_coding_transcript_variant
rs147170567	4	9986307	C	T	0.0183449	0.104311	0.0161862	41.5311	9.9355	1.16011e-10	6.44444	URT	SLC2A9	intron_variant, intron_variant&non_coding_transcript_variant, downstream_gene_variant
rs147264346	4	72748445	C	T	0.0249365	-0.118947	0.0162471	53.5985	12.6092	2.45923e-13	-7.32112	VITD	.	intergenic_variant
rs147350938	4	9924493	C	T	0.012065	0.128373	0.0198883	41.6629	9.96479	1.08445e-10	6.4547	URT	SLC2A9, RP13-560N11.1	intron_variant, non_coding_transcript_exon_variant, intron_variant&non_coding_transcript_variant
rs148633069	4	10085102	T	G	0.0109603	-0.218429	0.0206767	111.598	25.3589	4.37623e-26	-10.564	URT	WDR1, MIR3138	intron_variant, intron_variant&non_coding_transcript_variant, downstream_gene_variant, upstream_gene_variant
rs148838662	4	10783349	C	T	0.0125485	-0.118969	0.0194005	37.6048	9.06232	8.66323e-10	-6.13226	URT	.	intergenic_variant
rs149766750	4	9752783	C	T	0.035018	0.0904642	0.0118416	58.3619	13.6614	2.18072e-14	7.63953	URT	OR7E35P	upstream_gene_variant
rs149897068	4	73000305	T	C	0.0259392	-0.0998222	0.0158442	39.6932	9.527	2.97167e-10	-6.30024	VITD	NPFFR2	intron_variant
rs151246458	4	9715620	T	C	0.0439193	-0.0624154	0.0105544	34.9716	8.47554	3.34549e-09	-5.91369	URT	ALG1L3P	upstream_gene_variant
rs16891020	4	9924563	C	T	0.0260638	-0.123428	0.0135725	82.7009	19.0202	9.54553e-20	-9.09398	URT	SLC2A9, RP13-560N11.1	intron_variant, non_coding_transcript_exon_variant, intron_variant&non_coding_transcript_variant
rs16894893	4	10205595	A	T	0.492679	0.0811294	0.00432217	352.332	77.8807	1.31613e-78	18.7705	URT	AC006499.6	upstream_gene_variant
rs182995365	4	9654117	C	T	0.00970907	-0.194439	0.0220248	77.9367	17.9731	1.0639e-18	-8.82818	URT	.	intergenic_variant
rs183203239	4	10462231	G	T	0.0122109	0.118929	0.0196248	36.7251	8.86641	1.36016e-09	6.06014	URT	ZNF518B	upstream_gene_variant
rs1860910	4	10275470	T	G	0.484825	0.143201	0.00433355	1091.95	238.732	1.85353e-239	33.0447	URT	.	intergenic_variant
rs186136533	4	11032357	T	C	0.0120951	-0.11128	0.0198232	31.5125	7.70299	1.98157e-08	-5.61362	URT	.	intergenic_variant
rs188503477	4	10334822	G	A	0.0140167	-0.24473	0.0183402	178.059	39.8907	1.28617e-40	-13.3439	URT	.	intergenic_variant
rs191869082	4	10340135	G	A	0.00976701	-0.295674	0.0219187	181.969	40.7445	1.80094e-41	-13.4896	URT	.	intergenic_variant
rs191892884	4	9701937	A	C	0.0088524	-0.211823	0.0231095	84.0166	19.3092	4.90682e-20	-9.16606	URT	FAM86MP, ALG1L3P	intron_variant&non_coding_transcript_variant, downstream_gene_variant
rs2012249	4	10521158	T	C	0.0214551	-0.219064	0.014869	217.059	48.4021	3.96187e-49	-14.7329	URT	CLNK	intron_variant, downstream_gene_variant, upstream_gene_variant
rs2139242	4	9849864	C	T	0.0182895	-0.145252	0.0161174	81.2183	18.6944	2.02116e-19	-9.01212	URT	SLC2A9	intron_variant, intron_variant&non_coding_transcript_variant
rs222035	4	72621674	G	T	0.446048	-0.131646	0.00510644	664.634	145.833	1.46893e-146	-25.7804	VITD	GC, RNA5SP163	intron_variant, downstream_gene_variant, upstream_gene_variant, intron_variant&non_coding_transcript_variant, intron_variant&NMD_transcript_variant
rs2241474	4	10086015	C	T	0.49275	-0.161098	0.00432154	1389.65	303.428	3.7325e-304	-37.2779	URT	WDR1	intron_variant, intron_variant&non_coding_transcript_variant, downstream_gene_variant
rs2323333	4	144766590	T	C	0.474666	0.0397167	0.00476896	69.3583	16.0856	8.21107e-17	8.32817	HBA1C	RP13-578N3.3	intron_variant&non_coding_transcript_variant
rs2725244	4	89068761	C	T	0.475002	-0.061961	0.00431822	205.887	45.9647	1.08468e-46	-14.3487	URT	ABCG2	intron_variant
rs28556782	4	145051940	G	A	0.498294	-0.0568066	0.00474204	143.505	32.3412	4.55827e-33	-11.9794	HBA1C	GYPB, GYPA, RP11-673E1.4	intron_variant, downstream_gene_variant, intron_variant&NMD_transcript_variant, intron_variant&non_coding_transcript_variant
rs2867386	4	9795784	T	G	0.0359462	-0.124914	0.0115873	116.215	26.3701	4.26481e-27	-10.7803	URT	SLC2A9, RNA5SP154	downstream_gene_variant, intron_variant&non_coding_transcript_variant, upstream_gene_variant
rs2870238	4	77373079	T	C	0.496689	-0.0487954	0.00406692	143.955	32.4396	3.63413e-33	-11.9981	CREA	SHROOM3	intron_variant, intron_variant&non_coding_transcript_variant
rs2870238	4	77373079	T	C	0.496689	-0.0272155	0.00486052	31.3521	7.66711	2.15224e-08	-5.5993	URA	SHROOM3	intron_variant, intron_variant&non_coding_transcript_variant
rs34213329	4	9917484	C	G	0.0224736	-0.229379	0.014525	249.388	55.4522	3.53021e-56	-15.792	URT	SLC2A9	intron_variant, intron_variant&non_coding_transcript_variant
rs34592089	4	102926923	G	A	0.0611276	-0.0569249	0.00959965	35.1636	8.51836	3.03138e-09	-5.92989	APOA	BANK1, RP11-498M5.2	intron_variant, intron_variant&non_coding_transcript_variant
rs34592089	4	102926923	G	A	0.0611276	0.0593866	0.0101232	34.4145	8.35127	4.45379e-09	5.86639	AST	BANK1, RP11-498M5.2	intron_variant, intron_variant&non_coding_transcript_variant
rs34592089	4	102926923	G	A	0.0611276	-0.0658375	0.00948128	48.2184	11.4187	3.81329e-12	-6.94395	HDL	BANK1, RP11-498M5.2	intron_variant, intron_variant&non_coding_transcript_variant
rs34788376	4	9999054	A	G	0.0621327	0.118218	0.00896257	173.982	39.0005	9.98849e-40	13.1902	URT	SLC2A9	intron_variant, intron_variant&non_coding_transcript_variant
rs36055615	4	9489223	T	C	0.117828	-0.0695509	0.00673997	106.485	24.2387	5.77165e-25	-10.3192	URT	OR7E85P	downstream_gene_variant
rs4289442	4	10092522	C	T	0.0164474	-0.279524	0.0169093	273.268	60.6572	2.20191e-61	-16.5308	URT	WDR1	intron_variant, intron_variant&non_coding_transcript_variant
rs4342150	4	144796354	T	G	0.466023	-0.0387174	0.00477209	65.8254	15.3074	4.9272e-16	-8.1133	HBA1C	GYPE	intron_variant, downstream_gene_variant, intron_variant&NMD_transcript_variant
rs4599354	4	145013489	A	T	0.470387	-0.0424459	0.00476178	79.457	18.3073	4.92833e-19	-8.91387	HBA1C	GYPB, RP11-673E1.4	intron_variant, intron_variant&non_coding_transcript_variant
rs4694507	4	73523070	A	G	0.0629919	-0.0595369	0.0104278	32.5976	7.94555	1.13357e-08	-5.70944	VITD	.	intergenic_variant
rs4697950	4	10171644	T	G	0.406751	0.0373291	0.00437298	72.8684	16.8583	1.3858e-17	8.53631	URT	AC006499.7	upstream_gene_variant
rs4698002	4	10280893	G	A	0.0181448	-0.275052	0.016107	291.611	64.6544	2.21615e-65	-17.0766	URT	.	intergenic_variant
rs4698072	4	10571993	T	A	0.0110275	-0.185101	0.020673	80.1703	18.4641	3.43479e-19	-8.95376	URT	CLNK	intron_variant
rs56292253	4	10263571	G	A	0.0261609	0.0741168	0.0135215	30.0457	7.37471	4.21978e-08	5.4814	URT	AC006499.5	upstream_gene_variant
rs568988378	4	10118484	G	T	0.0174739	0.122721	0.0164805	55.4498	13.0183	9.58738e-14	7.44644	URT	WDR1, RNA5SP155	5_prime_UTR_variant, upstream_gene_variant, non_coding_transcript_exon_variant
rs61795156	4	10602669	C	T	0.0406954	0.0715282	0.0109448	42.7106	10.1974	6.34746e-11	6.53536	URT	CLNK	intron_variant
rs62286289	4	10206717	A	G	0.0112376	0.120452	0.0204625	34.6505	8.40392	3.9453e-09	5.88648	URT	AC006499.6	upstream_gene_variant
rs62286325	4	10238391	C	G	0.470823	-0.135141	0.0043308	973.725	213.034	9.24698e-214	-31.2046	URT	AC006499.9	downstream_gene_variant
rs62293329	4	9907662	T	A	0.0136182	0.121585	0.0185914	42.7695	10.2105	6.15886e-11	6.53985	URT	SLC2A9	intron_variant, intron_variant&non_coding_transcript_variant
rs62295967	4	9970052	C	A	0.0128867	0.131847	0.0191191	47.5561	11.272	5.34564e-12	6.89609	URT	SLC2A9	intron_variant, intron_variant&non_coding_transcript_variant
rs62296002	4	9992862	C	T	0.0491516	0.134192	0.00997392	181.017	40.5367	2.90603e-41	13.4543	URT	SLC2A9	intron_variant, intron_variant&non_coding_transcript_variant, downstream_gene_variant
rs6447945	4	10407461	A	G	0.477262	0.070934	0.00432273	269.273	59.7867	1.63418e-60	16.4095	URT	.	intergenic_variant
rs6448972	4	9709511	T	C	0.0390782	-0.118456	0.0111853	112.154	25.4807	3.30598e-26	-10.5903	URT	FAM86MP, ALG1L3P	downstream_gene_variant, intron_variant&non_coding_transcript_variant, upstream_gene_variant
rs6449265	4	10066134	G	C	0.423669	-0.0398194	0.00436205	83.3311	19.1586	6.94065e-20	-9.1286	URT	RP11-448G15.3	downstream_gene_variant
rs6600898	4	69997684	C	G	0.483865	-0.0337177	0.00507083	44.2139	10.5311	2.94374e-11	-6.64935	VITD	RP13-644M16.3	intron_variant&non_coding_transcript_variant
rs6813534	4	10623225	G	A	0.0100157	-0.136623	0.0217243	39.551	9.49539	3.19602e-10	-6.28895	URT	CLNK	intron_variant
rs6823622	4	10293550	T	C	0.494772	0.0817181	0.00431441	358.751	79.2785	5.26623e-80	18.9407	URT	AC006499.2, AC006499.1	downstream_gene_variant
rs6851365	4	10162149	C	T	0.0152656	0.113968	0.0175741	42.0551	10.0519	8.8736e-11	6.485	URT	.	intergenic_variant
rs72645662	4	72681568	C	T	0.0231282	-0.159249	0.0168724	89.0839	20.422	3.78443e-21	-9.43843	VITD	.	intergenic_variant
rs72647036	4	74318500	A	G	0.0192211	-0.108765	0.0181683	35.8384	8.66881	2.14383e-09	-5.98653	ALB	AFP	intron_variant, upstream_gene_variant, intron_variant&non_coding_transcript_variant
rs72649167	4	74539183	G	A	0.0244538	-0.0974953	0.0160961	36.6882	8.8582	1.38612e-09	-6.05708	ALB	.	intergenic_variant
rs72651017	4	72788527	C	T	0.0695062	-0.0902807	0.00992697	82.7098	19.0221	9.50386e-20	-9.09449	VITD	.	intergenic_variant
rs72651420	4	72875986	T	C	0.034592	-0.0851276	0.0139043	37.4837	9.03536	9.21807e-10	-6.12239	VITD	.	intergenic_variant
rs72875499	4	88762112	G	A	0.0178659	0.0961154	0.0163312	34.6377	8.40105	3.97146e-09	5.88539	URT	MEPE	intron_variant, intron_variant&non_coding_transcript_variant
rs73218799	4	10179079	A	G	0.07858	0.0618775	0.00805306	59.0396	13.811	1.54525e-14	7.68373	URT	.	intergenic_variant
rs73222573	4	10265107	A	T	0.0183494	0.106412	0.0161282	43.5318	10.3797	4.17157e-11	6.59788	URT	AC006499.5, AC006499.4	upstream_gene_variant, downstream_gene_variant
rs73224456	4	10379059	T	C	0.0112191	0.112105	0.0205326	29.8096	7.32183	4.76618e-08	5.45985	URT	.	intergenic_variant
rs74453475	4	10331887	C	G	0.0182895	-0.269341	0.0160423	281.884	62.535	2.91743e-63	-16.7894	URT	.	intergenic_variant
rs74568848	4	145129466	T	A	0.042661	-0.0782937	0.0118249	43.839	10.4479	3.56533e-11	-6.62109	HBA1C	.	intergenic_variant
rs74838002	4	10008678	T	C	0.0168695	-0.1245	0.0167123	55.4968	13.0287	9.36052e-14	-7.4496	URT	SLC2A9, RP11-448G15.1	intron_variant, intron_variant&non_coding_transcript_variant
rs75686099	4	10547424	T	C	0.0197566	-0.211215	0.0155024	185.632	41.5441	2.85693e-42	-13.6247	URT	CLNK	intron_variant
rs76285604	4	10764602	C	T	0.0174079	-0.100081	0.0164839	36.8624	8.897	1.26765e-09	-6.07144	URT	.	intergenic_variant
rs7662070	4	146809017	T	C	0.485773	0.0354691	0.00465575	58.039	13.5901	2.5698e-14	7.61834	GGT	ZNF827	intron_variant, intron_variant&non_coding_transcript_variant, upstream_gene_variant
rs7665177	4	73055314	T	C	0.0730697	-0.0682319	0.00968212	49.6632	11.7386	1.82558e-12	-7.04721	VITD	.	intergenic_variant
rs7678751	4	7219035	G	A	0.400619	-0.0314194	0.00486608	41.6904	9.97089	1.06933e-10	-6.45682	IGF1	SORCS2	intron_variant
rs7684895	4	88208266	A	C	0.480471	-0.0267205	0.00483051	30.5987	7.49853	3.173e-08	-5.53161	ALT	.	intergenic_variant
rs7684895	4	88208266	A	C	0.480471	-0.0360203	0.00455249	62.6031	14.5971	2.52872e-15	-7.91222	SHBG	.	intergenic_variant
rs7686230	4	9657345	C	T	0.0362479	-0.119664	0.0115686	106.994	24.3502	4.46478e-25	-10.3439	URT	.	intergenic_variant
rs76903922	4	10173951	G	A	0.109743	-0.244859	0.00688759	1263.86	276.092	8.09096e-277	-35.5508	URT	AC006499.7	upstream_gene_variant
rs77796046	4	10533535	A	G	0.0417667	0.0742267	0.0107777	47.4317	11.2445	5.69508e-12	6.88706	URT	CLNK	intron_variant
rs77849807	4	26152727	A	G	0.0161262	0.117792	0.0196764	35.8379	8.66871	2.14432e-09	5.98646	ALB	.	intergenic_variant
rs77999810	4	10337742	C	T	0.015604	0.0961809	0.0173779	30.6324	7.50607	3.11839e-08	5.53467	URT	.	intergenic_variant
rs78002041	4	10000356	G	A	0.0167433	0.117312	0.0168279	48.5987	11.503	3.14051e-12	6.97128	URT	SLC2A9	intron_variant, intron_variant&non_coding_transcript_variant
rs78108713	4	10208823	C	T	0.00999619	-0.124459	0.0216789	32.9594	8.02639	9.41044e-09	-5.74102	URT	.	intergenic_variant
rs78139294	4	10365700	A	G	0.0204663	0.109972	0.0152349	52.1055	12.279	5.26017e-13	7.21843	URT	.	intergenic_variant
rs78785836	4	9844767	C	T	0.0173807	0.106437	0.0165041	41.5913	9.94888	1.12492e-10	6.44912	URT	SLC2A9	intron_variant, intron_variant&non_coding_transcript_variant
rs79020759	4	10328335	A	G	0.0250573	-0.195611	0.0137879	201.277	44.9588	1.09951e-45	-14.1871	URT	.	intergenic_variant
rs79444700	4	72620557	T	C	0.0442894	0.0916748	0.0123067	55.4904	13.0273	9.39074e-14	7.44918	VITD	GC, RNA5SP163	intron_variant, downstream_gene_variant, upstream_gene_variant, intron_variant&non_coding_transcript_variant, intron_variant&NMD_transcript_variant
rs79753544	4	144592286	G	A	0.0215038	-0.0948605	0.0164047	33.4377	8.13321	7.35851e-09	-5.78252	HBA1C	FREM3	intron_variant
rs79954247	4	10353628	T	C	0.051559	0.0681808	0.0097614	48.7866	11.5446	2.85365e-12	6.98474	URT	.	intergenic_variant
rs79987947	4	10327200	G	C	0.0198702	0.0983881	0.0154518	40.5439	9.71614	1.92247e-10	6.36742	URT	.	intergenic_variant
rs80204783	4	9894371	C	T	0.0400578	0.0853251	0.011007	60.0919	14.0432	9.05316e-15	7.75189	URT	SLC2A9	intron_variant, intron_variant&non_coding_transcript_variant
rs842872	4	72695059	A	G	0.494121	-0.0917649	0.00504555	330.777	73.1865	6.50879e-74	-18.1873	VITD	.	intergenic_variant
rs9291683	4	10324160	G	A	0.483582	0.142988	0.00432073	1095.18	239.433	3.68978e-240	33.0935	URT	.	intergenic_variant
rs9684176	4	9716386	G	T	0.421864	-0.0653535	0.00436771	223.888	49.8916	1.28351e-50	-14.9629	URT	ALG1L3P	upstream_gene_variant
rs9799404	4	144894260	T	C	0.469833	-0.0390227	0.0047653	67.0586	15.5791	2.63572e-16	-8.18893	HBA1C	RP11-673E1.1, RP11-673E1.4	upstream_gene_variant, intron_variant&non_coding_transcript_variant, splice_polypyrimidine_tract_variant&splice_region_variant&intron_variant&non_coding_transcript_variant
rs997219	4	10524671	G	A	0.448577	-0.0526597	0.0043291	147.966	33.3164	4.82614e-34	-12.1641	URT	CLNK	intron_variant, downstream_gene_variant
rs9993457	4	144673517	T	C	0.476163	0.0396173	0.00475901	69.3006	16.0729	8.45474e-17	8.32469	HBA1C	RP13-578N3.3	intron_variant&non_coding_transcript_variant
rs9994887	4	69537475	A	G	0.474917	-0.0280871	0.00464931	36.4951	8.81517	1.53049e-09	-6.04113	GGT	UGT2B15	upstream_gene_variant
rs9997101	4	144699045	T	C	0.475907	0.0398806	0.00475868	70.2343	16.2785	5.26623e-17	8.3806	HBA1C	RP13-578N3.3	intron_variant&non_coding_transcript_variant
rs10066749	5	31055026	T	G	0.480559	-0.0387863	0.00466167	69.2268	16.0567	8.77607e-17	-8.32026	GGT	RPL19P11	downstream_gene_variant
rs10074736	5	72108001	T	C	0.474922	0.0317351	0.00497732	40.6526	9.7403	1.81844e-10	6.37594	ALB	TNPO1, CTD-2631K10.1	upstream_gene_variant, intron_variant&non_coding_transcript_variant
rs10074736	5	72108001	T	C	0.474922	-0.0369019	0.00484523	58.0053	13.5827	2.61397e-14	-7.61613	AST	TNPO1, CTD-2631K10.1	upstream_gene_variant, intron_variant&non_coding_transcript_variant
rs10462511	5	74384115	A	G	0.406844	0.0361036	0.00502365	51.6489	12.178	6.63743e-13	7.18673	LDL	ANKRD31	intron_variant, intron_variant&non_coding_transcript_variant
rs10462511	5	74384115	A	G	0.406844	0.0320404	0.00494082	42.0532	10.0515	8.88178e-11	6.48483	APOB	ANKRD31	intron_variant, intron_variant&non_coding_transcript_variant
rs10462511	5	74384115	A	G	0.406844	0.0340959	0.00503908	45.7828	10.879	1.3213e-11	6.76629	CHO	ANKRD31	intron_variant, intron_variant&non_coding_transcript_variant
rs10942739	5	74786083	G	A	0.230492	0.06176	0.00585645	111.21	25.274	5.32108e-26	10.5456	LDL	COL4A3BP	intron_variant
rs10942739	5	74786083	G	A	0.230492	0.0550367	0.00575988	91.3015	20.9088	1.23367e-21	9.55518	APOB	COL4A3BP	intron_variant
rs10942739	5	74786083	G	A	0.230492	0.0544547	0.00587444	85.9288	19.7292	1.86552e-20	9.26977	CHO	COL4A3BP	intron_variant
rs1173743	5	32775047	T	G	0.48048	-0.0266483	0.00466662	32.6088	7.94807	1.12702e-08	-5.71041	SBP	NPR3	intron_variant, intron_variant&non_coding_transcript_variant
rs11959928	5	39397132	T	A	0.423974	0.0388067	0.0041431	87.7329	20.1254	7.49204e-21	9.36659	CREA	DAB2, C9	intron_variant, intron_variant&non_coding_transcript_variant, intron_variant&NMD_transcript_variant, upstream_gene_variant
rs137976175	5	40908575	G	A	0.0563865	-0.09323	0.0106052	77.2813	17.829	1.48252e-18	-8.79097	URA	C7, RNU7-161P	upstream_gene_variant, downstream_gene_variant
rs2335418	5	74603479	G	A	0.415696	0.0638422	0.00502779	161.235	36.2163	6.07715e-37	12.6979	LDL	.	intergenic_variant
rs2335418	5	74603479	G	A	0.415696	0.0540726	0.00494489	119.575	27.1058	7.83791e-28	10.935	APOB	.	intergenic_variant
rs2335418	5	74603479	G	A	0.415696	0.0609612	0.00504324	146.113	32.9113	1.22659e-33	12.0877	CHO	.	intergenic_variant
rs3828591	5	32713108	G	C	0.393395	-0.0278412	0.00478276	33.8858	8.23325	5.84454e-09	-5.82116	SBP	NPR3	intron_variant, intron_variant&non_coding_transcript_variant
rs3846662	5	74651084	A	G	0.419776	0.0678729	0.00500195	184.126	41.2153	6.09116e-42	13.5693	LDL	HMGCR	intron_variant, downstream_gene_variant, non_coding_transcript_exon_variant, upstream_gene_variant
rs3846662	5	74651084	A	G	0.419776	0.0584184	0.00491947	141.014	31.7966	1.59735e-32	11.8749	APOB	HMGCR	intron_variant, downstream_gene_variant, non_coding_transcript_exon_variant, upstream_gene_variant
rs3846662	5	74651084	A	G	0.419776	0.0629557	0.00501731	157.445	35.388	4.09261e-36	12.5477	CHO	HMGCR	intron_variant, downstream_gene_variant, non_coding_transcript_exon_variant, upstream_gene_variant
rs4704826	5	156392082	A	C	0.366749	-0.0336646	0.00509382	43.6776	10.4121	3.87168e-11	-6.60891	LDL	TIMD4	upstream_gene_variant
rs4704826	5	156392082	A	C	0.366749	-0.0296288	0.00500983	34.977	8.47675	3.33618e-09	-5.91413	APOB	TIMD4	upstream_gene_variant
rs4704826	5	156392082	A	C	0.366749	-0.0365565	0.00510947	51.1891	12.0763	8.3888e-13	-7.15466	CHO	TIMD4	upstream_gene_variant
rs478575	5	72339109	T	C	0.465228	0.0333856	0.00498019	44.9392	10.692	2.03236e-11	6.70368	ALB	FCHO2	intron_variant
rs478575	5	72339109	T	C	0.465228	-0.0384076	0.00484802	62.7633	14.6325	2.33077e-15	-7.92233	AST	FCHO2	intron_variant
rs588945	5	72441121	G	C	0.427316	0.0259253	0.00423191	37.5297	9.04562	9.00285e-10	6.12615	URT	RP11-232L2.2	intron_variant&non_coding_transcript_variant
rs722677	5	42748289	A	G	0.461447	-0.0294479	0.00479198	37.7639	9.09775	7.98454e-10	-6.14525	IGF1	.	intergenic_variant
rs888789	5	74988369	A	G	0.459766	0.0371778	0.00494996	56.4109	13.2306	5.88031e-14	7.51073	LDL	POC5	intron_variant&non_coding_transcript_variant, intron_variant, downstream_gene_variant
rs888789	5	74988369	A	G	0.459766	0.0307206	0.00486834	39.8197	9.55514	2.78522e-10	6.31028	APOB	POC5	intron_variant&non_coding_transcript_variant, intron_variant, downstream_gene_variant
rs888789	5	74988369	A	G	0.459766	0.039514	0.00496516	63.3338	14.7582	1.74502e-15	7.95825	CHO	POC5	intron_variant&non_coding_transcript_variant, intron_variant, downstream_gene_variant
rs1049130	6	32629859	G	A	0.488746	-0.0371755	0.00654608	32.2516	7.86824	1.35444e-08	-5.67905	AST	HLA-DQB1, HLA-DQB1-AS1, XXbac-BPG254F23.6	synonymous_variant, downstream_gene_variant, intron_variant&non_coding_transcript_variant, upstream_gene_variant, missense_variant&NMD_transcript_variant, non_coding_transcript_exon_variant
rs1049130	6	32629859	G	A	0.488746	-0.0375481	0.00683785	30.1534	7.39882	3.9919e-08	-5.49121	TPROT	HLA-DQB1, HLA-DQB1-AS1, XXbac-BPG254F23.6	synonymous_variant, downstream_gene_variant, intron_variant&non_coding_transcript_variant, upstream_gene_variant, missense_variant&NMD_transcript_variant, non_coding_transcript_exon_variant
rs10946798	6	25781853	G	T	0.443682	0.0412907	0.00441165	87.6	20.0962	8.01309e-21	9.35947	URT	SLC17A1, SLC17A4	downstream_gene_variant
rs114966185	6	24405067	T	C	0.0326623	-0.0838223	0.0133257	39.5673	9.499	3.16957e-10	-6.29027	ALP	MRS2	intron_variant, intron_variant&non_coding_transcript_variant
rs115901482	6	24580768	G	A	0.0306723	0.0812603	0.0137687	34.8313	8.44425	3.59542e-09	5.90181	ALP	KIAA0319	intron_variant
rs115960026	6	24570830	A	C	0.0120201	-0.153458	0.0217514	49.7745	11.7633	1.72465e-12	-7.05509	ALP	KIAA0319	intron_variant
rs117733303	6	160922870	A	G	0.0188388	0.111442	0.0181483	37.7077	9.08523	8.21807e-10	6.14063	LDL	LPAL2	intron_variant&non_coding_transcript_variant
rs117733303	6	160922870	A	G	0.0188388	0.114822	0.0178611	41.3269	9.89014	1.28783e-10	6.42861	APOB	LPAL2	intron_variant&non_coding_transcript_variant
rs117733303	6	160922870	A	G	0.0188388	0.104908	0.0181945	33.2459	8.09039	8.12101e-09	5.76592	CHO	LPAL2	intron_variant&non_coding_transcript_variant
rs12528678	6	158398815	G	T	0.207192	0.0315201	0.00572905	30.2698	7.42489	3.75933e-08	5.5018	GGT	SYNJ2	upstream_gene_variant
rs1262542	6	127032008	A	T	0.493191	0.0541197	0.00479521	127.379	28.8139	1.53497e-29	11.2862	IGF1	.	intergenic_variant
rs13194491	6	27037080	C	T	0.0918542	-0.0644274	0.00898553	51.4107	12.1254	7.49204e-13	-7.17013	HBA1C	.	intergenic_variant
rs1340698	6	24256726	A	G	0.0254133	0.091076	0.0152294	35.7635	8.65211	2.22787e-09	5.98027	ALP	DCDC2	intron_variant
rs138799960	6	23972500	C	A	0.0155053	0.148523	0.0192459	59.554	13.9245	1.18987e-14	7.71712	ALP	RP1-59B16.1	non_coding_transcript_exon_variant
rs1391373	6	32603660	T	C	0.360708	0.04253	0.00586266	52.6262	12.3942	4.0346e-13	7.25439	AST	HLA-DQA1	upstream_gene_variant, intron_variant
rs139184544	6	24139140	T	C	0.00987997	-0.235835	0.0240092	96.4848	22.0461	8.9929e-23	-9.82269	ALP	NRSN1	intron_variant, intron_variant&non_coding_transcript_variant
rs143001479	6	24484551	G	A	0.0100952	-0.201156	0.023707	71.9971	16.6665	2.15526e-17	-8.48509	ALP	GPLD1	intron_variant, intron_variant&non_coding_transcript_variant
rs145169613	6	24447337	A	G	0.0193174	0.11018	0.0171857	41.1027	9.84033	1.44434e-10	6.41114	ALP	GPLD1	intron_variant
rs146279568	6	24399218	G	A	0.0187453	-0.120054	0.0174596	47.2805	11.211	6.15177e-12	-6.8761	ALP	MRS2	upstream_gene_variant
rs1474296	6	166340770	G	C	0.480029	-0.0342216	0.00480132	50.8019	11.9907	1.02164e-12	-7.12754	IGF1	LINC00473, PDE10A	intron_variant&non_coding_transcript_variant
rs148716963	6	24549727	T	C	0.0116198	-0.131588	0.0222141	35.0895	8.50183	3.14898e-09	-5.92363	ALP	KIAA0319	intron_variant
rs149313571	6	24517668	T	C	0.0115789	-0.135449	0.0222506	37.0568	8.94029	1.14739e-09	-6.08743	ALP	ALDH5A1	intron_variant
rs150552973	6	23887816	C	T	0.0140353	0.141606	0.0202054	49.1162	11.6176	2.41213e-12	7.00832	ALP	.	intergenic_variant
rs151189505	6	23686757	A	G	0.0130716	0.142217	0.020942	46.1176	10.9533	1.11353e-11	6.79099	ALP	.	intergenic_variant
rs1541988	6	25950804	A	C	0.479476	0.0335152	0.00494223	45.9872	10.9243	1.19042e-11	6.78139	HBA1C	.	intergenic_variant
rs1541988	6	25950804	A	C	0.479476	-0.0454008	0.0043501	108.925	24.7734	1.685e-25	-10.4367	URT	.	intergenic_variant
rs1766	6	32627795	A	G	0.47213	-0.0402602	0.00583657	47.5812	11.2776	5.27716e-12	-6.89792	TPROT	HLA-DQB1, HLA-DQB1-AS1, XXbac-BPG254F23.6	3_prime_UTR_variant, non_coding_transcript_exon_variant, downstream_gene_variant
rs1927695	6	25378113	A	G	0.16802	-0.0352701	0.00646784	29.7369	7.30553	4.94846e-08	-5.45315	HBA1C	LRRC16A	intron_variant, intron_variant&non_coding_transcript_variant
rs1971508	6	26085807	C	A	0.456557	0.0310422	0.00498446	38.7854	9.32508	4.73064e-10	6.2278	HBA1C	HFE	upstream_gene_variant
rs198809	6	26128766	A	G	0.471566	0.0260578	0.00441803	34.7871	8.43438	3.67807e-09	5.89806	URT	HIST1H2AC, HIST1H2BC	intron_variant&NMD_transcript_variant, upstream_gene_variant, downstream_gene_variant, intron_variant
rs2229643	6	33660597	C	T	0.0164512	-0.134131	0.0193194	48.2025	11.4152	3.84415e-12	-6.94281	PHOS	UQCC2, ITPR3, SBP1	downstream_gene_variant, synonymous_variant
rs2234185	6	42897074	T	C	0.491883	0.0269177	0.00457589	34.6039	8.39351	4.04101e-09	5.88251	APOA	PTCRA, CNPY3	downstream_gene_variant, 5_prime_UTR_variant
rs2235215	6	16131156	T	C	0.304929	-0.0307253	0.00537364	32.693	7.96689	1.07922e-08	-5.71778	LDL	MYLIP	intron_variant
rs2235215	6	16131156	T	C	0.304929	-0.0288847	0.00528859	29.8301	7.32642	4.71607e-08	-5.4617	APOB	MYLIP	intron_variant
rs2442728	6	31319355	G	T	0.401961	-0.0327694	0.00598993	29.9291	7.34858	4.48146e-08	-5.47075	CHO	HLA-B	downstream_gene_variant
rs2490272	6	108895386	T	C	0.372599	-0.0394968	0.00495998	63.4109	14.7752	1.67803e-15	-7.9631	IGF1	FOXO3	intron_variant
rs2596512	6	31317828	C	T	0.454614	-0.0332111	0.00606313	30.0036	7.36528	4.31241e-08	-5.47755	ALB	HLA-B	downstream_gene_variant
rs2734573	6	31494738	A	C	0.429941	0.0338989	0.00587059	33.3432	8.11212	7.72467e-09	5.77436	TPROT	DDX39B, ATP6V1G2-DDX39B, MCCD1, RPL15P4	downstream_gene_variant, upstream_gene_variant
rs2814949	6	34656722	A	G	0.360228	-0.0292429	0.00479487	37.1952	8.97112	1.06876e-09	-6.09879	APOA	C6orf106, RP3-391O22.1, snoU13, RN7SL200P	intron_variant, downstream_gene_variant, upstream_gene_variant
rs2814949	6	34656722	A	G	0.360228	-0.0312541	0.00473882	43.4984	10.3723	4.24326e-11	-6.59533	HDL	C6orf106, RP3-391O22.1, snoU13, RN7SL200P	intron_variant, downstream_gene_variant, upstream_gene_variant
rs2814966	6	34712232	C	T	0.330784	-0.0267328	0.00482213	30.7335	7.5287	2.96006e-08	-5.54377	HDL	RP3-375P9.2	non_coding_transcript_exon_variant
rs2817240	6	24541453	G	A	0.492557	-0.026315	0.00476522	30.4959	7.47551	3.34572e-08	-5.52231	ALP	ALDH5A1, KIAA0319	downstream_gene_variant
rs2917894	6	74567444	A	T	0.49517	-0.0318092	0.00504767	39.7122	9.53124	2.94279e-10	-6.30176	CAL	.	intergenic_variant
rs3127574	6	160791370	C	G	0.496112	-0.0281795	0.00454453	38.4493	9.25029	5.61966e-10	-6.20075	SHBG	SLC22A3	intron_variant
rs365475	6	132055621	C	T	0.471016	0.0551954	0.00493718	124.982	28.2894	5.1357e-29	11.1795	PHOS	ENPP3	intron_variant
rs4709431	6	160853746	A	C	0.0188883	0.109276	0.0181333	36.3156	8.77517	1.67815e-09	6.02626	LDL	SLC22A3	intron_variant
rs4709431	6	160853746	A	C	0.0188883	0.112009	0.0178463	39.3923	9.4601	3.46657e-10	6.27631	APOB	SLC22A3	intron_variant
rs4709431	6	160853746	A	C	0.0188883	0.104113	0.0181795	32.798	7.99034	1.02249e-08	5.72695	CHO	SLC22A3	intron_variant
rs4711750	6	43757082	T	A	0.49861	-0.0293699	0.00451526	42.3097	10.1084	7.79112e-11	-6.50459	HDL	VEGFA	downstream_gene_variant
rs4711750	6	43757082	T	A	0.49861	0.0365226	0.00482161	57.3772	13.444	3.59749e-14	7.57477	TRIG	VEGFA	downstream_gene_variant
rs55730499	6	161005610	C	T	0.078366	0.0763951	0.00920245	68.9167	15.9884	1.02707e-16	8.3016	LDL	LPA	intron_variant
rs55730499	6	161005610	C	T	0.078366	0.0707215	0.00905681	60.9751	14.2381	5.77963e-15	7.80865	APOB	LPA	intron_variant
rs55730499	6	161005610	C	T	0.078366	0.071545	0.0092259	60.1369	14.0531	8.84912e-15	7.7548	CHO	LPA	intron_variant
rs560402318	6	23734002	G	C	0.0134231	0.153235	0.0206431	55.1015	12.9413	1.14472e-13	7.42306	ALP	.	intergenic_variant
rs62401919	6	24453765	G	A	0.0312791	0.110739	0.0136505	65.8115	15.3044	4.96135e-16	8.11245	ALP	GPLD1	intron_variant
rs6907805	6	87856003	G	T	0.485849	-0.0273555	0.00478841	32.6367	7.95429	1.11099e-08	-5.71286	IGF1	RP11-393I2.4	downstream_gene_variant
rs6910514	6	24524651	C	G	0.0348621	0.0825723	0.0130655	39.9409	9.5821	2.61758e-10	6.31987	ALP	ALDH5A1	intron_variant, intron_variant&non_coding_transcript_variant
rs6918194	6	24453238	C	G	0.0969503	-0.0477351	0.00803115	35.3281	8.55505	2.7858e-09	-5.94374	ALP	GPLD1	intron_variant
rs6922489	6	166262523	A	G	0.420875	0.030051	0.00483588	38.6159	9.28737	5.15977e-10	6.21417	IGF1	PDE10A	intron_variant&non_coding_transcript_variant
rs6925764	6	34832661	T	C	0.329382	-0.026726	0.00482481	30.6836	7.51754	3.03711e-08	-5.53929	HDL	UHRF1BP1	intron_variant
rs6926383	6	25903235	C	T	0.484477	0.0334312	0.00494015	45.7956	10.8819	1.3125e-11	6.76724	HBA1C	.	intergenic_variant
rs6926383	6	25903235	C	T	0.484477	-0.0458621	0.00434827	111.244	25.2813	5.23239e-26	-10.5472	URT	.	intergenic_variant
rs72828936	6	24132022	G	A	0.0361313	0.0998653	0.0126528	62.2949	14.5292	2.95665e-15	7.89274	ALP	NRSN1	upstream_gene_variant, intron_variant, downstream_gene_variant, intron_variant&non_coding_transcript_variant
rs72830895	6	24315442	A	G	0.066824	0.0934907	0.00946085	97.651	22.3019	4.98999e-23	9.88185	ALP	DCDC2	intron_variant
rs73726632	6	24248942	T	G	0.0498527	-0.060405	0.0108917	30.7578	7.53412	2.92334e-08	-5.54597	ALP	DCDC2	intron_variant
rs73743304	6	33649461	G	A	0.0540113	-0.164855	0.0109049	228.538	50.9059	1.24194e-51	-15.1175	PHOS	ITPR3	intron_variant
rs75874733	6	33752723	C	T	0.0226783	-0.102505	0.01656	38.315	9.22041	6.01991e-10	-6.18992	PHOS	LEMD2	intron_variant, intron_variant&NMD_transcript_variant, upstream_gene_variant
rs7742369	6	34165721	A	G	0.175598	0.0403681	0.00661137	37.2814	8.99032	1.02254e-09	6.10586	CAL	.	intergenic_variant
rs7752761	6	24310313	C	T	0.392917	-0.0368335	0.00486148	57.405	13.4501	3.54732e-14	-7.5766	ALP	DCDC2	intron_variant
rs7769712	6	132193395	A	C	0.0665256	0.0607079	0.00990183	37.5889	9.05879	8.73394e-10	6.13098	PHOS	ENPP1	intron_variant, intron_variant&non_coding_transcript_variant, intron_variant&NMD_transcript_variant
rs793668	6	24439196	C	G	0.469234	0.0775289	0.00475018	266.383	59.1568	6.96947e-60	16.3213	ALP	GPLD1	intron_variant, upstream_gene_variant
rs9270588	6	32561327	T	C	0.467318	0.037017	0.00568388	42.4145	10.1317	7.38414e-11	6.51263	AST	HLA-DRB1	upstream_gene_variant
rs9271325	6	32582513	C	G	0.472245	-0.0429134	0.00569139	56.8524	13.3281	4.69786e-14	-7.54006	AST	.	intergenic_variant
rs9271378	6	32587300	A	G	0.490949	-0.0362399	0.00578342	39.2648	9.43175	3.70041e-10	-6.26617	TPROT	.	intergenic_variant
rs9272779	6	32610314	T	C	0.404923	-0.0423361	0.00588627	51.7298	12.1959	6.36942e-13	-7.19235	AST	HLA-DQA1	intron_variant, non_coding_transcript_exon_variant, intron_variant&NMD_transcript_variant
rs9273852	6	32629603	T	C	0.405349	-0.040744	0.00575679	50.0918	11.8335	1.46724e-12	-7.07756	TPROT	HLA-DQB1, HLA-DQB1-AS1, XXbac-BPG254F23.6	intron_variant, downstream_gene_variant, intron_variant&non_coding_transcript_variant, upstream_gene_variant, intron_variant&NMD_transcript_variant, non_coding_transcript_exon_variant
rs9276497	6	32719027	G	A	0.0829487	-0.0741489	0.0115219	41.4153	9.90978	1.23089e-10	-6.43548	TPROT	HLA-DQA2, HLA-DQB2, MIR3135B	downstream_gene_variant, upstream_gene_variant
rs9295122	6	160570013	C	T	0.393459	-0.0333813	0.00505793	43.5574	10.3854	4.11718e-11	-6.59979	LDL	SLC22A1	intron_variant, intron_variant&NMD_transcript_variant
rs9295122	6	160570013	C	T	0.393459	-0.0290915	0.00497788	34.1543	8.29319	5.09108e-09	-5.84415	APOB	SLC22A1	intron_variant, intron_variant&NMD_transcript_variant
rs9295122	6	160570013	C	T	0.393459	-0.0307646	0.00507081	36.8083	8.88495	1.30332e-09	-6.067	CHO	SLC22A1	intron_variant, intron_variant&NMD_transcript_variant
rs9295619	6	24250511	C	T	0.389831	-0.0333522	0.00487272	46.8495	11.1155	7.66479e-12	-6.84468	ALP	DCDC2	intron_variant
rs9362415	6	87968565	A	G	0.488865	-0.0283116	0.00478843	34.9577	8.47244	3.36946e-09	-5.9125	IGF1	ZNF292	missense_variant, downstream_gene_variant, intron_variant
rs9364558	6	160929944	G	C	0.497846	0.0295178	0.00453958	42.2803	10.1019	7.90861e-11	6.50232	SHBG	LPAL2	intron_variant&non_coding_transcript_variant
rs9368364	6	21905643	A	T	0.471888	-0.0261963	0.00464383	31.8219	7.77217	1.68978e-08	-5.6411	GGT	CASC15	intron_variant&non_coding_transcript_variant
rs9461209	6	25732302	G	C	0.408221	0.0277487	0.00446744	38.5805	9.27949	5.25424e-10	6.21132	URT	HIST1H2BA, HIST1H2BPS1, HIST1H2APS1	downstream_gene_variant, non_coding_transcript_exon_variant, upstream_gene_variant
rs9462860	6	42947013	C	G	0.460184	-0.0314133	0.00460205	46.5933	11.0587	8.73575e-12	-6.82594	APOA	PEX6	upstream_gene_variant
rs9462860	6	42947013	C	G	0.460184	0.0278146	0.00488492	32.4212	7.90614	1.24125e-08	5.69397	APOB	PEX6	upstream_gene_variant
rs9469899	6	34793124	G	A	0.358058	-0.0284236	0.00480168	35.0407	8.49094	3.22894e-09	-5.91951	APOA	UHRF1BP1, Y_RNA	intron_variant, downstream_gene_variant
rs9469899	6	34793124	G	A	0.358058	-0.0302686	0.00474555	40.6831	9.74707	1.79032e-10	-6.37831	HDL	UHRF1BP1, Y_RNA	intron_variant, downstream_gene_variant
rs9482771	6	127446610	G	C	0.497569	0.0295856	0.00484598	37.2731	8.98848	1.02688e-09	6.10518	TRIG	RSPO3	intron_variant, intron_variant&non_coding_transcript_variant
rs9482771	6	127446610	G	C	0.497569	0.0321691	0.00488197	43.4199	10.3549	4.41672e-11	6.58937	URA	RSPO3	intron_variant, intron_variant&non_coding_transcript_variant
rs10950655	7	17308367	C	T	0.495527	0.0254653	0.0042399	36.0734	8.72119	1.90025e-09	6.00611	TBIL	.	intergenic_variant
rs12534970	7	15031507	A	G	0.488122	-0.0297942	0.00504086	34.9346	8.46728	3.40973e-09	-5.91054	GLUC	.	intergenic_variant
rs147085961	7	98029427	C	A	0.0307193	-0.0730334	0.0132307	30.4704	7.46979	3.39008e-08	-5.52	SHBG	BAIAP2L1	intron_variant, intron_variant&non_coding_transcript_variant, non_coding_transcript_exon_variant
rs1496499	7	45979023	T	G	0.45606	-0.0416521	0.00481502	74.8303	17.2899	5.12979e-18	-8.65045	IGF1	.	intergenic_variant
rs182118140	7	72927592	A	G	0.0114251	-0.13555	0.0228307	35.2503	8.5377	2.89935e-09	-5.93718	TRIG	BAZ1B	intron_variant
rs205755	7	130580343	C	T	0.326233	0.0294804	0.00511496	33.2186	8.08429	8.23588e-09	5.76356	IGF1	MIR29A, AC016831.7	intron_variant&non_coding_transcript_variant
rs2074754	7	72891754	C	T	0.475709	0.0332826	0.00484203	47.2476	11.2037	6.25605e-12	6.87369	TRIG	BAZ1B	synonymous_variant
rs2284776	7	44216754	T	C	0.496383	-0.0411412	0.00474526	75.1683	17.3643	4.32215e-18	-8.66996	HBA1C	GCK	intron_variant, intron_variant&non_coding_transcript_variant
rs2284776	7	44216754	T	C	0.496383	-0.0300468	0.00501083	35.9563	8.6951	2.0179e-09	-5.99637	GLUC	GCK	intron_variant, intron_variant&non_coding_transcript_variant
rs2374270	7	151402790	C	A	0.368888	0.0234641	0.00421115	31.046	7.59863	2.51982e-08	5.5719	CREA	PRKAG2	intron_variant, intron_variant&non_coding_transcript_variant, intron_variant&NMD_transcript_variant
rs2374270	7	151402790	C	A	0.368888	0.0293082	0.00503664	33.8608	8.22768	5.91998e-09	5.819	URA	PRKAG2	intron_variant, intron_variant&non_coding_transcript_variant, intron_variant&NMD_transcript_variant
rs2893236	7	26038458	T	C	0.222532	-0.0346945	0.00556656	38.8462	9.33861	4.58553e-10	-6.23266	GGT	.	intergenic_variant
rs34512209	7	46826936	A	T	0.433042	0.0389201	0.00485132	64.3619	14.9849	1.03538e-15	8.02258	IGF1	EPS15P1	downstream_gene_variant
rs35732917	7	73013269	T	C	0.285114	-0.0449104	0.00513911	76.3691	17.6284	2.35288e-18	-8.73895	GGT	MLXIPL	intron_variant, intron_variant&NMD_transcript_variant, upstream_gene_variant, intron_variant&non_coding_transcript_variant, downstream_gene_variant
rs35732917	7	73013269	T	C	0.285114	-0.0806266	0.0053509	227.041	50.5793	2.63451e-51	-15.0679	TRIG	MLXIPL	intron_variant, intron_variant&NMD_transcript_variant, upstream_gene_variant, intron_variant&non_coding_transcript_variant, downstream_gene_variant
rs35867424	7	72032358	G	A	0.0270566	-0.0896174	0.0149587	35.8919	8.68074	2.08574e-09	-5.99099	TRIG	TYW1B	intron_variant&non_coding_transcript_variant
rs36100458	7	73099588	C	T	0.0389698	-0.107347	0.012519	73.5265	17.0031	9.92887e-18	-8.57473	TRIG	WBSCR22, DNAJC30	intron_variant, upstream_gene_variant, intron_variant&NMD_transcript_variant, intron_variant&non_coding_transcript_variant
rs3757840	7	44231216	T	G	0.49387	-0.065476	0.00475272	189.793	42.4525	3.52777e-43	-13.7765	HBA1C	GCK	upstream_gene_variant, intron_variant&non_coding_transcript_variant
rs3757840	7	44231216	T	G	0.49387	-0.0738231	0.00501871	216.372	48.2522	5.595e-49	-14.7096	GLUC	GCK	upstream_gene_variant, intron_variant&non_coding_transcript_variant
rs4576329	7	18007152	G	A	0.483269	0.0311271	0.00497845	39.0921	9.39332	4.04278e-10	6.25237	ALB	RNMTL1P2	downstream_gene_variant
rs4719841	7	25997536	A	G	0.403677	0.0327084	0.00492886	44.0379	10.492	3.22107e-11	6.6361	TRIG	.	intergenic_variant
rs4731701	7	130430930	C	T	0.495111	0.0302177	0.00460713	43.0193	10.266	5.42001e-11	6.5589	APOA	.	intergenic_variant
rs4731701	7	130430930	C	T	0.495111	0.0363709	0.00455277	63.8197	14.8654	1.36333e-15	7.98874	HDL	.	intergenic_variant
rs4731701	7	130430930	C	T	0.495111	-0.032823	0.00486885	45.447	10.8046	1.56819e-11	-6.74143	TRIG	.	intergenic_variant
rs60270726	7	46642837	A	T	0.482563	-0.0273032	0.00478217	32.5969	7.94541	1.13394e-08	-5.70937	IGF1	.	intergenic_variant
rs6956879	7	73113483	C	T	0.443367	-0.0268533	0.00488543	30.2127	7.4121	3.87168e-08	-5.49661	TRIG	STX1A, WBSCR22	downstream_gene_variant, intron_variant, intron_variant&NMD_transcript_variant
rs71553276	7	72205002	G	A	0.0301574	-0.0924767	0.0141818	42.5208	10.1553	6.99359e-11	-6.5208	TRIG	TYW1B	intron_variant, intron_variant&non_coding_transcript_variant
rs78454627	7	44279570	G	A	0.0341715	0.0772167	0.0130442	35.0418	8.49121	3.22693e-09	5.91962	HBA1C	CAMK2B	intron_variant, intron_variant&NMD_transcript_variant, downstream_gene_variant, intron_variant&non_coding_transcript_variant
rs79276073	7	46612748	C	T	0.0206687	0.0994762	0.0169323	34.5147	8.37362	4.23039e-09	5.87494	IGF1	.	intergenic_variant
rs79784692	7	44256526	A	G	0.0747989	-0.0525296	0.00902706	33.8622	8.228	5.91562e-09	-5.81913	HBA1C	YKT6, CAMK2B	downstream_gene_variant
rs799160	7	73060006	C	T	0.489448	0.0324843	0.00484	45.046	10.7157	1.92442e-11	6.71163	TRIG	.	intergenic_variant
rs856567	7	46721448	C	G	0.427579	-0.0851524	0.00484982	308.279	68.2858	5.17845e-69	-17.5578	IGF1	AC011294.3	intron_variant&non_coding_transcript_variant
rs116974927	8	19951598	G	C	0.0109408	0.174298	0.0219686	62.9474	14.673	2.12324e-15	7.93396	HDL	AC100802.3	intron_variant&non_coding_transcript_variant
rs116974927	8	19951598	G	C	0.0109408	-0.220084	0.023464	87.9779	20.1792	6.61912e-21	-9.37965	TRIG	AC100802.3	intron_variant&non_coding_transcript_variant
rs11779019	8	9229139	T	G	0.169259	0.0453152	0.00715597	40.1007	9.61761	2.41207e-10	6.3325	ALP	RNU6-526P, RP11-115J16.1, RP11-115J16.2	upstream_gene_variant, downstream_gene_variant, intron_variant&non_coding_transcript_variant
rs13263508	8	19942181	T	G	0.453419	-0.0447843	0.0046209	93.9287	21.4853	3.27115e-22	-9.69168	APOA	AC100802.3	intron_variant&non_coding_transcript_variant
rs13263508	8	19942181	T	G	0.453419	-0.0614214	0.00457784	180.019	40.3187	4.80065e-41	-13.4171	HDL	AC100802.3	intron_variant&non_coding_transcript_variant
rs13263508	8	19942181	T	G	0.453419	0.0591043	0.00488944	146.123	32.9136	1.22011e-33	12.0882	TRIG	AC100802.3	intron_variant&non_coding_transcript_variant
rs1436148	8	23721097	T	C	0.498647	0.0266367	0.00406751	42.8847	10.2361	5.80631e-11	6.54865	CREA	.	intergenic_variant
rs1436148	8	23721097	T	C	0.498647	0.0230739	0.00417056	30.6093	7.5009	3.15573e-08	5.53257	URT	.	intergenic_variant
rs17318886	8	126346926	C	T	0.0947735	0.0430768	0.00778284	30.6344	7.50652	3.11516e-08	5.53484	HDL	NSMCE2	intron_variant
rs190118115	8	19793581	C	T	0.0178435	-0.20737	0.0173761	142.426	32.1052	7.84874e-33	-11.9342	APOA	LPL	upstream_gene_variant, intron_variant
rs190118115	8	19793581	C	T	0.0178435	-0.236356	0.0172141	188.523	42.1753	6.67882e-43	-13.7304	HDL	LPL	upstream_gene_variant, intron_variant
rs190118115	8	19793581	C	T	0.0178435	0.204371	0.0183858	123.558	27.9778	1.05245e-28	11.1157	TRIG	LPL	upstream_gene_variant, intron_variant
rs2073617	8	119964283	G	A	0.487605	0.0338022	0.00472223	51.2385	12.0872	8.18088e-13	7.1581	ALP	TNFRSF11B	5_prime_UTR_variant, upstream_gene_variant
rs2100462	8	126549654	G	A	0.498096	-0.0273119	0.00486819	31.4752	7.69465	2.01999e-08	-5.61028	TRIG	RP11-136O12.2	intron_variant&non_coding_transcript_variant
rs2167065	8	76560454	T	C	0.494732	-0.0273038	0.00416756	42.922	10.2444	5.69639e-11	-6.55151	URT	.	intergenic_variant
rs28522810	8	19745934	T	C	0.499556	0.0294087	0.00455907	41.6102	9.95308	1.11409e-10	6.45059	HDL	.	intergenic_variant
rs28522810	8	19745934	T	C	0.499556	-0.027476	0.00486939	31.8388	7.77596	1.6751e-08	-5.6426	TRIG	.	intergenic_variant
rs2943593	8	76481795	C	T	0.480367	0.0346872	0.00416148	69.4773	16.1118	7.73036e-17	8.3353	URT	HNF4G	downstream_gene_variant
rs2954021	8	126482077	G	A	0.48885	0.0597561	0.00494071	146.28	32.9479	1.12746e-33	12.0946	LDL	RP11-136O12.2	intron_variant&non_coding_transcript_variant
rs2954021	8	126482077	G	A	0.48885	0.0373414	0.0048348	59.6519	13.9461	1.13214e-14	7.72346	ALT	RP11-136O12.2	intron_variant&non_coding_transcript_variant
rs2954021	8	126482077	G	A	0.48885	0.0581171	0.00472143	151.516	34.0925	8.08165e-35	12.3092	ALP	RP11-136O12.2	intron_variant&non_coding_transcript_variant
rs2954021	8	126482077	G	A	0.48885	0.0702236	0.00486297	208.527	46.5408	2.87872e-47	14.4405	APOB	RP11-136O12.2	intron_variant&non_coding_transcript_variant
rs2954021	8	126482077	G	A	0.48885	0.0539083	0.00495184	118.516	26.874	1.3366e-27	10.8865	CHO	RP11-136O12.2	intron_variant&non_coding_transcript_variant
rs2954021	8	126482077	G	A	0.48885	-0.0290257	0.00407414	50.7567	11.9806	1.04568e-12	-7.12437	CREA	RP11-136O12.2	intron_variant&non_coding_transcript_variant
rs2954021	8	126482077	G	A	0.48885	0.0261479	0.0046506	31.6123	7.72531	1.88231e-08	5.62248	GGT	RP11-136O12.2	intron_variant&non_coding_transcript_variant
rs2954021	8	126482077	G	A	0.48885	-0.0383434	0.00455548	70.8457	16.4131	3.86278e-17	-8.41698	HDL	RP11-136O12.2	intron_variant&non_coding_transcript_variant
rs2954021	8	126482077	G	A	0.48885	0.0892829	0.00486556	336.722	74.4812	3.30217e-75	18.35	TRIG	RP11-136O12.2	intron_variant&non_coding_transcript_variant
rs367273	8	81338686	C	A	0.338862	0.031342	0.00480696	42.5121	10.1534	7.02425e-11	6.52013	SHBG	.	intergenic_variant
rs3808457	8	116589497	A	T	0.438453	-0.0285265	0.00464701	37.6834	9.07983	8.32089e-10	-6.13868	APOA	TRPS1	intron_variant
rs3808457	8	116589497	A	T	0.438453	-0.0280297	0.0046037	37.0701	8.94325	1.13959e-09	-6.08852	HDL	TRPS1	intron_variant
rs3935700	8	42364121	C	T	0.497701	-0.0338546	0.00474337	50.9404	12.0213	9.52138e-13	-7.13725	HBA1C	SLC20A2	intron_variant, upstream_gene_variant, intron_variant&NMD_transcript_variant, intron_variant&non_coding_transcript_variant
rs4128744	8	19919655	C	T	0.134746	0.0929921	0.00676756	188.811	42.2381	5.77963e-43	13.7409	APOA	.	intergenic_variant
rs4128744	8	19919655	C	T	0.134746	0.131318	0.0067045	383.631	84.6956	2.01558e-85	19.5865	HDL	.	intergenic_variant
rs4128744	8	19919655	C	T	0.134746	-0.139569	0.00716086	379.882	83.8793	1.32038e-84	-19.4905	TRIG	.	intergenic_variant
rs4335137	8	19878874	A	T	0.493848	0.0355124	0.00460603	59.4438	13.9002	1.25835e-14	7.70998	APOA	.	intergenic_variant
rs4335137	8	19878874	A	T	0.493848	0.0468426	0.0045631	105.381	23.9966	1.00786e-24	10.2655	HDL	.	intergenic_variant
rs4335137	8	19878874	A	T	0.493848	-0.0433846	0.0048737	79.2416	18.26	5.49541e-19	-8.90178	TRIG	.	intergenic_variant
rs4422806	8	120022768	T	C	0.491786	-0.0348329	0.00472314	54.3899	12.7841	1.64399e-13	-7.37495	ALP	COLEC10	intron_variant&non_coding_transcript_variant
rs4921667	8	19547919	G	A	0.440225	-0.0266597	0.00459323	33.688	8.18911	6.46979e-09	-5.80413	HDL	CSGALNACT1, RP11-1105O14.1	intron_variant, downstream_gene_variant, intron_variant&non_coding_transcript_variant
rs56412759	8	81418949	A	G	0.19347	-0.0348387	0.00624639	31.1076	7.6124	2.44118e-08	-5.57741	DBP	ZBTB10	intron_variant
rs56412759	8	81418949	A	G	0.19347	0.0341935	0.00576603	35.1668	8.51907	3.02643e-09	5.93016	SHBG	ZBTB10	intron_variant
rs56899077	8	145996452	C	G	0.0136618	-0.178969	0.020774	74.2188	17.1554	6.99198e-18	-8.61505	ALT	ZNF34	downstream_gene_variant
rs62531546	8	146139223	C	T	0.0150843	-0.147076	0.0198073	55.1358	12.9489	1.12486e-13	-7.42534	ALT	.	intergenic_variant
rs6586867	8	19653050	A	G	0.406063	0.0276486	0.00463973	35.5109	8.59581	2.53624e-09	5.9591	HDL	.	intergenic_variant
rs66716313	8	145995765	A	G	0.47796	-0.0317463	0.00484482	42.9371	10.2477	5.65327e-11	-6.55263	ALT	ZNF34	downstream_gene_variant
rs6988314	8	145667079	C	T	0.0178487	-0.115717	0.0181836	40.4983	9.70599	1.96793e-10	-6.36381	ALT	TONSL, AC084125.4	intron_variant, downstream_gene_variant, non_coding_transcript_exon_variant
rs7000494	8	19873502	G	C	0.0292733	-0.113719	0.013696	68.9409	15.9937	1.01461e-16	-8.30308	APOA	.	intergenic_variant
rs7000494	8	19873502	G	C	0.0292733	-0.150611	0.0135684	123.213	27.9023	1.25228e-28	-11.1001	HDL	.	intergenic_variant
rs7000494	8	19873502	G	C	0.0292733	0.13366	0.0144919	85.0643	19.5394	2.88802e-20	9.22308	TRIG	.	intergenic_variant
rs7002551	8	9178135	T	C	0.244282	0.0369533	0.0055207	44.8042	10.662	2.17771e-11	6.69359	ALP	RP11-115J16.1	intron_variant&non_coding_transcript_variant, upstream_gene_variant
rs7002551	8	9178135	T	C	0.244282	-0.0336496	0.00532665	39.9073	9.57461	2.66312e-10	-6.31722	HDL	RP11-115J16.1	intron_variant&non_coding_transcript_variant, upstream_gene_variant
rs7004796	8	42450170	T	G	0.496073	-0.035031	0.00474125	54.5908	12.8285	1.48423e-13	-7.38856	HBA1C	.	intergenic_variant
rs7009778	8	41610643	T	C	0.425082	0.0310903	0.00479158	42.1009	10.0621	8.66762e-11	6.48853	HBA1C	ANK1	intron_variant
rs7016223	8	120056819	T	C	0.49512	0.0388029	0.00473017	67.2938	15.6309	2.33938e-16	8.20328	ALP	COLEC10	intron_variant&non_coding_transcript_variant
rs72640317	8	41629885	G	A	0.0110899	-0.13852	0.0227134	37.1932	8.97067	1.06987e-09	-6.0986	HBA1C	ANK1	intron_variant
rs72643865	8	41238247	G	A	0.0119709	-0.124769	0.0218642	32.5647	7.93822	1.15287e-08	-5.70654	HBA1C	.	intergenic_variant
rs73667498	8	19941877	G	T	0.0506195	0.0578193	0.0104265	30.7519	7.53281	2.93218e-08	5.54542	HDL	AC100802.3	intron_variant&non_coding_transcript_variant
rs74737417	8	19974789	C	G	0.0642877	0.0614489	0.00938838	42.8397	10.2261	5.94155e-11	6.54521	APOA	RPL30P9, AC100802.3	upstream_gene_variant, intron_variant&non_coding_transcript_variant
rs74737417	8	19974789	C	G	0.0642877	0.0933236	0.00930088	100.678	22.9657	1.08218e-23	10.0338	HDL	RPL30P9, AC100802.3	upstream_gene_variant, intron_variant&non_coding_transcript_variant
rs74737417	8	19974789	C	G	0.0642877	-0.100515	0.00993398	102.381	23.339	4.58142e-24	-10.1183	TRIG	RPL30P9, AC100802.3	upstream_gene_variant, intron_variant&non_coding_transcript_variant
rs75609851	8	19871080	G	A	0.0092753	0.162481	0.0238497	46.4126	11.0186	9.58076e-12	6.81271	HDL	.	intergenic_variant
rs75609851	8	19871080	G	A	0.0092753	-0.206005	0.0254731	65.4018	15.2141	6.10801e-16	-8.08716	TRIG	.	intergenic_variant
rs75835816	8	19885513	G	C	0.0167102	-0.158253	0.0179212	77.9778	17.9821	1.04208e-18	-8.83049	APOA	.	intergenic_variant
rs75835816	8	19885513	G	C	0.0167102	-0.187964	0.0177542	112.085	25.4655	3.42373e-26	-10.587	HDL	.	intergenic_variant
rs75835816	8	19885513	G	C	0.0167102	0.183913	0.0189627	94.0645	21.5151	3.05422e-22	9.69867	TRIG	.	intergenic_variant
rs7823698	8	41577121	C	G	0.0941316	-0.0600918	0.00814504	54.4307	12.7931	1.61027e-13	-7.37772	HBA1C	ANK1	intron_variant
rs78397456	8	119746935	G	A	0.0297576	0.0802139	0.0139747	32.9466	8.02354	9.4724e-09	5.73994	ALP	.	intergenic_variant
rs7842602	8	145651888	A	G	0.479919	0.0342766	0.004708	53.0059	12.4782	3.32506e-13	7.2805	ALP	VPS28, TONSL	intron_variant, downstream_gene_variant, non_coding_transcript_exon_variant, intron_variant&NMD_transcript_variant, intron_variant&non_coding_transcript_variant
rs11244032	9	136077004	C	G	0.47492	0.0496203	0.00479236	107.206	24.3966	4.01236e-25	10.354	ALP	OBP2B	downstream_gene_variant
rs112853430	9	107585213	C	T	0.0370265	0.0683614	0.012137	31.7246	7.75042	1.77656e-08	5.63248	APOA	ABCA1	intron_variant, downstream_gene_variant
rs113395696	9	136306531	C	G	0.0259014	0.0903261	0.0150872	35.8435	8.66995	2.13821e-09	5.98694	ALP	ADAMTS13	intron_variant, intron_variant&NMD_transcript_variant, intron_variant&non_coding_transcript_variant
rs116856166	9	136388479	G	A	0.0242639	0.117636	0.0155301	57.3767	13.4439	3.59832e-14	7.57471	ALP	TMEM8C	intron_variant, intron_variant&non_coding_transcript_variant
rs13283193	9	5626112	A	C	0.482145	0.0333835	0.00477805	48.8162	11.5511	2.81125e-12	6.98685	ALP	KIAA1432	upstream_gene_variant
rs139744322	9	135957064	C	T	0.0157913	-0.113777	0.0192251	35.0248	8.4874	3.25537e-09	-5.91815	ALP	CELP	upstream_gene_variant
rs140167248	9	136057884	C	A	0.0125653	-0.148263	0.021597	47.1277	11.1771	6.6512e-12	-6.86498	ALP	.	intergenic_variant
rs141429199	9	136332433	C	G	0.0128761	-0.207121	0.0213127	94.4427	21.5981	2.5229e-22	-9.7182	ALP	CACFD1, SLC2A6	intron_variant, downstream_gene_variant, intron_variant&non_coding_transcript_variant
rs141535538	9	136312911	C	T	0.0132612	-0.131314	0.0209681	39.2198	9.42173	3.78678e-10	-6.26256	ALP	ADAMTS13	intron_variant, intron_variant&NMD_transcript_variant, intron_variant&non_coding_transcript_variant
rs2000069	9	107635869	C	T	0.431806	-0.0332744	0.00464598	51.294	12.0995	7.95243e-13	-7.16198	APOA	ABCA1	intron_variant
rs2000069	9	107635869	C	T	0.431806	-0.029001	0.00500777	33.538	8.15561	6.9886e-09	-5.7912	CHO	ABCA1	intron_variant
rs2000069	9	107635869	C	T	0.431806	-0.0265391	0.00458967	33.4355	8.13273	7.36665e-09	-5.78235	HDL	ABCA1	intron_variant
rs2297409	9	107576246	G	A	0.198119	-0.0397827	0.0057536	47.8091	11.3281	4.69786e-12	-6.9144	APOA	ABCA1	intron_variant
rs2297409	9	107576246	G	A	0.198119	-0.0361009	0.00568387	40.3411	9.67106	2.13275e-10	-6.35146	HDL	ABCA1	intron_variant
rs2740486	9	107666513	T	G	0.469445	-0.0510889	0.00460566	123.046	27.8658	1.36207e-28	-11.0926	APOA	ABCA1	intron_variant
rs2740486	9	107666513	T	G	0.469445	-0.0428845	0.00454984	88.8398	20.3684	4.28154e-21	-9.4255	HDL	ABCA1	intron_variant
rs3094375	9	136319068	T	C	0.461108	0.037685	0.00482117	61.0988	14.2654	5.4275e-15	7.81657	ALP	ADAMTS13	intron_variant, upstream_gene_variant, intron_variant&non_coding_transcript_variant, downstream_gene_variant
rs34039247	9	136127956	A	C	0.0716894	-0.134839	0.00931569	209.507	46.7545	1.75995e-47	-14.4744	ALP	ABO, RP11-430N14.4	non_coding_transcript_exon_variant, downstream_gene_variant
rs34755188	9	104433255	C	T	0.0199916	0.120278	0.0171534	49.1672	11.6288	2.35072e-12	7.0119	ALP	GRIN3A	missense_variant
rs35775139	9	136034682	T	C	0.293113	-0.0374916	0.00524841	51.0283	12.0408	9.10332e-13	-7.14342	ALP	GBGT1, RALGDS	downstream_gene_variant, intron_variant, intron_variant&non_coding_transcript_variant
rs4742924	9	107601276	A	G	0.0666313	0.0529994	0.00919915	33.193	8.07858	8.34488e-09	5.76134	APOA	ABCA1	intron_variant
rs4742924	9	107601276	A	G	0.0666313	0.052814	0.00908766	33.775	8.20852	6.187e-09	5.81162	HDL	ABCA1	intron_variant
rs4744712	9	71434707	C	A	0.399506	0.0372854	0.00415828	80.399	18.5143	3.05985e-19	8.96654	CREA	PIP5K1B, RP11-203L2.4	intron_variant, downstream_gene_variant, intron_variant&NMD_transcript_variant
rs4878526	9	33164677	A	G	0.492836	-0.0277882	0.00484597	32.882	8.0091	9.79264e-09	-5.73429	AST	B4GALT1, RP11-326F20.5	intron_variant, upstream_gene_variant
rs4879666	9	33125279	A	G	0.491779	-0.0281666	0.00484291	33.8264	8.21999	6.02573e-09	-5.81605	AST	B4GALT1	intron_variant
rs4962096	9	136031908	A	G	0.474955	-0.0305005	0.00481062	40.1987	9.6394	2.29403e-10	-6.34024	ALP	GBGT1, RALGDS	downstream_gene_variant, intron_variant, intron_variant&non_coding_transcript_variant
rs4962108	9	136096706	A	G	0.157437	0.0550467	0.00658618	69.8546	16.1949	6.3841e-17	8.35791	ALP	LCN1P1	downstream_gene_variant
rs4979376	9	117158886	G	A	0.494246	-0.0450891	0.00483315	87.0331	19.9717	1.06733e-20	-9.32913	ALT	AKNA, RP11-9M16.2	upstream_gene_variant, downstream_gene_variant
rs4979376	9	117158886	G	A	0.494246	-0.0318763	0.00484446	43.2959	10.3274	4.70544e-11	-6.57995	AST	AKNA, RP11-9M16.2	upstream_gene_variant, downstream_gene_variant
rs500499	9	136148648	C	G	0.465444	0.139709	0.00480421	845.674	185.198	6.3387e-186	29.0805	ALP	ABO	intron_variant&non_coding_transcript_variant
rs55710199	9	136376405	C	T	0.0117454	-0.132612	0.0222686	35.4637	8.58528	2.59848e-09	-5.95511	ALP	TMEM8C	downstream_gene_variant
rs570071	9	104205038	T	C	0.300144	0.0513562	0.00521753	96.8847	22.1338	7.34852e-23	9.84301	ALP	.	intergenic_variant
rs616154	9	136150466	T	C	0.486524	0.139288	0.00478743	846.488	185.375	4.21697e-186	29.0945	ALP	ABO	intron_variant&non_coding_transcript_variant
rs61751475	9	136228007	C	T	0.0306859	0.0868577	0.013878	39.1706	9.41078	3.88347e-10	6.25866	ALP	SURF2, SURF1, SURF4	missense_variant, upstream_gene_variant, downstream_gene_variant
rs62547761	9	91518718	A	T	0.055041	-0.10456	0.010453	100.057	22.8296	1.48047e-23	-10.0029	HBA1C	.	intergenic_variant
rs62551536	9	91607378	A	C	0.051503	-0.0853541	0.010783	62.6574	14.6091	2.4598e-15	-7.91562	HBA1C	C9orf47, S1PR3	3_prime_UTR_variant, intron_variant, upstream_gene_variant, downstream_gene_variant
rs62566032	9	107549827	G	A	0.0970691	0.0511797	0.00773257	43.8075	10.4409	3.62326e-11	6.61872	APOA	ABCA1	intron_variant
rs62566032	9	107549827	G	A	0.0970691	0.0435431	0.00763886	32.4924	7.92206	1.19658e-08	5.70021	HDL	ABCA1	intron_variant
rs62575995	9	136268311	A	G	0.495355	0.0309918	0.00478169	42.0079	10.0414	9.09076e-11	6.48135	ALP	REXO4, C9orf96	downstream_gene_variant, intron_variant
rs71503180	9	136106974	G	A	0.0846794	0.0752594	0.00860028	76.5765	17.674	2.11836e-18	8.75081	ALP	LCN1P1	upstream_gene_variant
rs72779222	9	136347832	T	C	0.0619007	0.0581479	0.00994006	34.2208	8.30803	4.92006e-09	5.84985	ALP	SLC2A6	upstream_gene_variant
rs75685923	9	136275229	C	T	0.0460661	0.090253	0.0113858	62.8346	14.6482	2.24802e-15	7.9268	ALP	REXO4, C9orf96, ADAMTS13	intron_variant, downstream_gene_variant, upstream_gene_variant
rs7862461	9	136044016	A	C	0.355217	0.0523834	0.00501212	109.231	24.8402	1.44477e-25	10.4513	ALP	GBGT1, RALGDS	upstream_gene_variant
rs78755596	9	136124590	T	A	0.0264136	-0.250424	0.0150305	277.588	61.5988	2.51884e-62	-16.6611	ALP	ABO, RP11-430N14.4	downstream_gene_variant
rs79147081	9	136359785	A	G	0.143408	0.0493445	0.00684211	52.0111	12.2582	5.51823e-13	7.21188	ALP	.	intergenic_variant
rs8176689	9	136138351	A	C	0.440864	0.136214	0.00480308	804.268	176.196	6.36796e-177	28.3597	ALP	ABO	intron_variant&non_coding_transcript_variant
rs9411500	9	136172187	A	G	0.305983	-0.0388176	0.00518145	56.1248	13.1674	6.80143e-14	-7.49165	ALP	.	intergenic_variant
rs10218900	10	17749307	C	G	0.412657	0.0281171	0.00495542	32.1943	7.85544	1.39495e-08	5.67401	AST	STAM	intron_variant
rs10762764	10	79566365	T	G	0.376452	0.0433587	0.00480226	81.5196	18.7606	1.7354e-19	9.02881	GGT	DLG5	intron_variant, intron_variant&non_coding_transcript_variant, intron_variant&NMD_transcript_variant, downstream_gene_variant
rs10786156	10	96014622	C	G	0.430474	-0.0299439	0.00472263	40.2022	9.64018	2.28992e-10	-6.34051	SBP	PLCE1	intron_variant
rs10795701	10	9314364	C	G	0.274263	0.0508732	0.00563596	81.4783	18.7515	1.77215e-19	9.02654	CAL	LINC00709	upstream_gene_variant
rs10822109	10	64765654	C	T	0.467842	-0.0331197	0.00472812	49.0677	11.6068	2.47286e-12	-7.00483	ALP	.	intergenic_variant
rs10822109	10	64765654	C	T	0.467842	-0.0407364	0.00456217	79.7299	18.3673	4.2924e-19	-8.92917	SHBG	.	intergenic_variant
rs10822143	10	64887856	T	C	0.495793	-0.0822957	0.0047227	303.651	67.2776	5.27716e-68	-17.4256	ALP	RP11-144G16.1	upstream_gene_variant
rs10822143	10	64887856	T	C	0.495793	-0.0911563	0.00455695	400.152	88.2922	5.1027e-89	-20.0038	SHBG	RP11-144G16.1	upstream_gene_variant
rs10822143	10	64887856	T	C	0.495793	0.0332598	0.00423293	61.7386	14.4065	3.92193e-15	7.85739	TBIL	RP11-144G16.1	upstream_gene_variant
rs10995583	10	65451074	G	A	0.485689	-0.0369078	0.00473796	60.6812	14.1732	6.7112e-15	-7.78981	ALP	RP11-170M17.1	intron_variant&non_coding_transcript_variant
rs10995583	10	65451074	G	A	0.485689	-0.0266665	0.00457168	34.0237	8.26404	5.44453e-09	-5.83298	SHBG	RP11-170M17.1	intron_variant&non_coding_transcript_variant
rs11254509	10	17340342	C	A	0.492737	-0.027311	0.00487507	31.3843	7.67432	2.1168e-08	-5.60218	AST	.	intergenic_variant
rs11591780	10	104225316	C	G	0.488872	0.028129	0.00473094	35.3519	8.56035	2.75201e-09	5.94575	ALP	TMEM180, RP11-18I14.10	intron_variant, upstream_gene_variant, downstream_gene_variant
rs117872282	10	71054102	C	T	0.0262034	-0.0851684	0.0150072	32.2075	7.85838	1.38554e-08	-5.67517	HBA1C	HK1	intron_variant, intron_variant&non_coding_transcript_variant
rs12416367	10	17682941	A	G	0.121421	-0.0785694	0.00747398	110.51	25.1206	7.5753e-26	-10.5124	AST	STAM, RP11-390B4.5	upstream_gene_variant, downstream_gene_variant
rs1248897	10	79680991	T	C	0.463008	-0.0514379	0.00467953	120.826	27.3798	4.17061e-28	-10.9921	GGT	DLG5	intron_variant
rs12768517	10	17654819	A	G	0.122496	-0.042046	0.00742074	32.1037	7.83517	1.4616e-08	-5.66601	AST	PTPLA	downstream_gene_variant, intron_variant
rs138843369	10	71221117	G	T	0.0139035	-0.218437	0.0204969	113.574	25.7917	1.61547e-26	-10.6571	HBA1C	TSPAN15	intron_variant, intron_variant&non_coding_transcript_variant
rs149172666	10	71302731	G	A	0.0137933	-0.180764	0.0205534	77.3494	17.844	1.43219e-18	-8.79485	HBA1C	.	intergenic_variant
rs1658469	10	60292402	G	A	0.45583	-0.0239278	0.0041944	32.5438	7.93353	1.16539e-08	-5.7047	URT	BICC1	intron_variant
rs17779355	10	103928374	G	A	0.0695679	-0.0707187	0.00929547	57.8796	13.5549	2.78676e-14	-7.60787	ALP	NOLC1	downstream_gene_variant
rs1926736	10	17891705	G	A	0.381942	-0.125591	0.00500145	630.558	138.422	3.78443e-139	-25.1109	AST	MRC1L1, MIR511-1	missense_variant, downstream_gene_variant
rs2084274	10	71145894	G	A	0.498447	0.0459222	0.00478963	91.9266	21.046	8.99498e-22	9.58784	HBA1C	HK1	intron_variant, intron_variant&non_coding_transcript_variant
rs2274351	10	104264107	T	C	0.459984	-0.0273362	0.00474417	33.2013	8.08042	8.3096e-09	-5.76206	ALP	SUFU, ACTR1A	intron_variant, upstream_gene_variant
rs2477669	10	17806504	A	G	0.181362	0.0945023	0.00630218	224.855	50.1026	7.89587e-51	14.9952	AST	TMEM236	intron_variant
rs2488112	10	18306427	A	G	0.484448	-0.0282325	0.00488434	33.4108	8.12722	7.46071e-09	-5.78021	AST	SLC39A12	intron_variant
rs2494658	10	101215902	A	T	0.4632	-0.0297972	0.00486982	37.439	9.02541	9.4317e-10	-6.11875	AST	.	intergenic_variant
rs2619587	10	65410405	T	G	0.492554	0.029657	0.00473375	39.2502	9.4285	3.72821e-10	6.26501	ALP	.	intergenic_variant
rs35160301	10	17877539	C	A	0.113507	-0.0604692	0.00768691	61.8821	14.4381	3.6467e-15	-7.86652	AST	MRC1L1	intron_variant
rs41277356	10	18291222	A	G	0.025159	-0.114902	0.0155337	54.7144	12.8558	1.3938e-13	-7.39695	AST	SLC39A12, SLC39A12-AS1	intron_variant, non_coding_transcript_exon_variant, downstream_gene_variant
rs41278520	10	70452260	A	G	0.0375893	-0.0783045	0.0125589	38.875	9.34502	4.51835e-10	-6.23498	HBA1C	TET1	3_prime_UTR_variant
rs41299234	10	70672804	C	T	0.0266973	-0.105422	0.0148693	50.267	11.8723	1.34184e-12	-7.08991	HBA1C	DDX50, RNU6-571P	intron_variant, upstream_gene_variant, intron_variant&NMD_transcript_variant
rs4545434	10	64875745	T	C	0.180198	-0.0396904	0.00612381	42.0075	10.0413	9.09285e-11	-6.48132	ALP	.	intergenic_variant
rs4545434	10	64875745	T	C	0.180198	-0.0561409	0.00590889	90.2709	20.6826	2.07683e-21	-9.50109	SHBG	.	intergenic_variant
rs45489291	10	17685692	C	A	0.0242232	0.0991379	0.0158256	39.2427	9.42681	3.74274e-10	6.2644	AST	STAM, RP11-390B4.5	upstream_gene_variant, non_coding_transcript_exon_variant
rs4917896	10	102039463	C	T	0.489291	0.0438513	0.00483984	82.0926	18.8865	1.29867e-19	9.06049	ALT	BLOC1S2	downstream_gene_variant, intron_variant
rs4917896	10	102039463	C	T	0.489291	0.0320059	0.00488189	42.9818	10.2577	5.52459e-11	6.55605	AST	BLOC1S2	downstream_gene_variant, intron_variant
rs522951	10	102110901	G	C	0.49151	-0.0256585	0.00469889	29.8177	7.32363	4.74646e-08	-5.46054	ALP	SCD, RP11-34D15.2	intron_variant, upstream_gene_variant
rs56145646	10	101695581	C	A	0.0719237	-0.053241	0.00940082	32.0746	7.82868	1.48361e-08	-5.66344	ALT	DNMBP, DNMBP-AS1	intron_variant, intron_variant&non_coding_transcript_variant, upstream_gene_variant
rs61855795	10	79617549	A	G	0.0521563	0.065259	0.0104531	38.9753	9.36734	4.292e-10	6.24303	GGT	DLG5	intron_variant, intron_variant&NMD_transcript_variant, intron_variant&non_coding_transcript_variant
rs6480394	10	71056714	A	G	0.25395	-0.0395515	0.00549352	51.8351	12.2192	6.03671e-13	-7.19966	HBA1C	HK1, RP11-227H15.7	intron_variant, downstream_gene_variant, intron_variant&non_coding_transcript_variant
rs7082141	10	101625270	C	G	0.49238	-0.0270751	0.00485356	31.1184	7.61482	2.42762e-08	-5.5784	ALT	.	intergenic_variant
rs7082141	10	101625270	C	G	0.49238	-0.0274096	0.00489573	31.345	7.66552	2.16013e-08	-5.59867	AST	.	intergenic_variant
rs7093334	10	65381594	T	C	0.0302993	0.0762212	0.0132984	32.8515	8.00228	9.94764e-09	5.73161	SHBG	REEP3	3_prime_UTR_variant
rs72788346	10	9356353	G	A	0.113688	0.0453214	0.00794567	32.5346	7.93148	1.1709e-08	5.70391	CAL	.	intergenic_variant
rs7393121	10	5268003	A	C	0.252818	0.0376995	0.00551459	46.7353	11.0902	8.12456e-12	6.83632	IGF1	.	intergenic_variant
rs75613164	10	70366398	T	C	0.0322388	-0.0826963	0.0135271	37.3732	9.01076	9.75529e-10	-6.11338	HBA1C	TET1	intron_variant
rs78159125	10	18258429	A	G	0.082719	-0.049654	0.00886004	31.4078	7.67957	2.09137e-08	-5.60426	AST	SLC39A12	intron_variant
rs7893985	10	101893418	G	A	0.497281	-0.0431022	0.00482719	79.7278	18.3668	4.29734e-19	-8.92905	ALT	.	intergenic_variant
rs7893985	10	101893418	G	A	0.497281	-0.0287232	0.00486913	34.7987	8.43698	3.65612e-09	-5.89904	AST	.	intergenic_variant
rs7906181	10	101821683	T	C	0.453793	-0.0361222	0.00484658	55.5494	13.0403	9.11381e-14	-7.45313	ALT	CPN1	intron_variant
rs7906181	10	101821683	T	C	0.453793	-0.026763	0.00488869	29.97	7.35775	4.38783e-08	-5.47447	AST	CPN1	intron_variant
rs7909192	10	71124228	G	A	0.378179	-0.098325	0.0049469	395.059	87.1834	6.55541e-88	-19.8761	HBA1C	HK1, AC016821.1	intron_variant, upstream_gene_variant, downstream_gene_variant, intron_variant&non_coding_transcript_variant
rs7909192	10	71124228	G	A	0.378179	0.0268409	0.00437184	37.6935	9.08207	8.27809e-10	6.1395	TBIL	HK1, AC016821.1	intron_variant, upstream_gene_variant, downstream_gene_variant, intron_variant&non_coding_transcript_variant
rs7910827	10	64912097	C	T	0.0476476	0.0651886	0.0107157	37.0084	8.92952	1.1762e-09	6.08347	SHBG	NRBF2	intron_variant
rs7912524	10	71098295	A	T	0.487464	0.0916512	0.00480955	363.135	80.2329	5.84925e-81	19.0561	HBA1C	HK1	intron_variant, intron_variant&non_coding_transcript_variant, non_coding_transcript_exon_variant
rs7914134	10	71056198	A	T	0.125126	-0.0573675	0.00723775	62.824	14.6458	2.26048e-15	-7.92615	HBA1C	HK1, RP11-227H15.7	intron_variant, downstream_gene_variant, intron_variant&non_coding_transcript_variant
rs7916868	10	64988931	T	A	0.497089	-0.0819292	0.00472979	300.05	66.4931	3.21292e-67	-17.322	ALP	JMJD1C	intron_variant, intron_variant&non_coding_transcript_variant
rs7916868	10	64988931	T	A	0.497089	-0.0929774	0.00456379	415.053	91.5357	2.91273e-92	-20.3728	SHBG	JMJD1C	intron_variant, intron_variant&non_coding_transcript_variant
rs7916868	10	64988931	T	A	0.497089	0.0308583	0.00423929	52.9855	12.4736	3.36047e-13	7.27912	TBIL	JMJD1C	intron_variant, intron_variant&non_coding_transcript_variant
rs7916868	10	64988931	T	A	0.497089	0.0277183	0.00483933	32.8069	7.99232	1.01784e-08	5.72771	TRIG	JMJD1C	intron_variant, intron_variant&non_coding_transcript_variant
rs7924036	10	65191645	T	G	0.497198	-0.0820115	0.00472264	301.564	66.8229	1.50349e-67	-17.3656	ALP	JMJD1C, PRELID1P3	intron_variant, downstream_gene_variant
rs7924036	10	65191645	T	G	0.497198	-0.0932954	0.0045569	419.162	92.4301	3.7145e-93	-20.4734	SHBG	JMJD1C, PRELID1P3	intron_variant, downstream_gene_variant
rs7924036	10	65191645	T	G	0.497198	0.0310187	0.00423288	53.7002	12.6316	2.33561e-13	7.32804	TBIL	JMJD1C, PRELID1P3	intron_variant, downstream_gene_variant
rs7924036	10	65191645	T	G	0.497198	0.0284188	0.00483201	34.5903	8.39048	4.0693e-09	5.88136	TRIG	JMJD1C, PRELID1P3	intron_variant, downstream_gene_variant
rs7924080	10	114787012	T	C	0.465226	0.0319506	0.00479045	44.4842	10.591	2.56448e-11	6.66964	HBA1C	TCF7L2	intron_variant
rs79962861	10	65346889	C	T	0.0811735	0.0480291	0.00832804	33.26	8.09354	8.06232e-09	5.76716	SHBG	REEP3	intron_variant
rs943329	10	18269875	T	G	0.49187	-0.0829551	0.00487437	289.633	64.2235	5.97723e-65	-17.0186	AST	SLC39A12	intron_variant
rs1004446	11	2170143	G	A	0.390826	0.0629748	0.00490663	164.728	36.9793	1.04882e-37	12.8346	IGF1	IGF2, INS-IGF2, IGF2-AS	intron_variant, intron_variant&NMD_transcript_variant, downstream_gene_variant, intron_variant&non_coding_transcript_variant
rs10766163	11	14204488	G	A	0.425607	-0.0359257	0.00513021	49.0389	11.6004	2.50957e-12	-7.00277	VITD	SPON1	intron_variant&non_coding_transcript_variant
rs10767873	11	30768678	C	T	0.459488	-0.0250514	0.00408101	37.6815	9.07941	8.32895e-10	-6.13853	CREA	.	intergenic_variant
rs10832164	11	14048480	T	C	0.482741	-0.0282629	0.00506085	31.188	7.63039	2.34212e-08	-5.58462	VITD	SPON1	intron_variant&non_coding_transcript_variant
rs10892070	11	116951533	G	A	0.431348	-0.0444516	0.00465501	91.1872	20.8837	1.30707e-21	-9.5492	APOA	SIK3	intron_variant, intron_variant&NMD_transcript_variant, intron_variant&non_coding_transcript_variant
rs10892070	11	116951533	G	A	0.431348	-0.0269138	0.00492918	29.8126	7.32249	4.75894e-08	-5.4601	TRIG	SIK3	intron_variant, intron_variant&NMD_transcript_variant, intron_variant&non_coding_transcript_variant
rs112072036	11	14561519	A	G	0.0447108	-0.19813	0.0122739	260.576	57.8911	1.28499e-58	-16.1424	VITD	PSMA1	intron_variant
rs11234027	11	71234107	G	A	0.128006	-0.0962563	0.00758896	160.877	36.1379	7.27947e-37	-12.6837	VITD	KRTAP5-7, NADSYN1	upstream_gene_variant, intron_variant&NMD_transcript_variant
rs11605327	11	116823062	G	A	0.432936	-0.0445439	0.00465156	91.7022	20.9967	1.00763e-21	-9.57612	APOA	SIK3	intron_variant, intron_variant&NMD_transcript_variant, intron_variant&non_coding_transcript_variant
rs116995028	11	116999072	C	T	0.0123485	0.178953	0.0219055	66.7377	15.5084	3.1017e-16	8.16932	TRIG	.	intergenic_variant
rs117290792	11	14818020	T	C	0.0455748	0.0706653	0.0121494	33.83	8.2208	6.01451e-09	5.81636	VITD	PDE3B	intron_variant, intron_variant&non_coding_transcript_variant
rs117595077	11	14894946	G	A	0.00869441	0.162611	0.027233	35.654	8.62771	2.35662e-09	5.9711	VITD	PDE3B, CYP2R1	downstream_gene_variant
rs117693013	11	2198479	G	A	0.0490025	0.0672863	0.0110428	37.1273	8.95599	1.10665e-09	6.09323	IGF1	MIR4686	downstream_gene_variant
rs11820062	11	65429936	T	C	0.479151	0.0258877	0.00418623	38.2422	9.2042	6.24885e-10	6.18401	URT	RELA	intron_variant, intron_variant&non_coding_transcript_variant, intron_variant&NMD_transcript_variant, upstream_gene_variant, 5_prime_UTR_variant
rs11821656	11	5689144	G	C	0.139922	0.0425097	0.00679497	39.1383	9.40361	3.94812e-10	6.25605	ALP	TRIM5	intron_variant, intron_variant&NMD_transcript_variant, intron_variant&non_coding_transcript_variant
rs12222793	11	92667047	A	G	0.44859	0.0272184	0.00476676	32.6047	7.94715	1.12941e-08	5.71004	HBA1C	SNRPGP16	upstream_gene_variant
rs12282721	11	117151412	G	A	0.108929	0.0509697	0.00736206	47.9319	11.3553	4.41266e-12	6.92329	APOA	RNF214, BACE1	intron_variant, downstream_gene_variant, upstream_gene_variant
rs1263151	11	116641028	T	C	0.489154	0.0584785	0.00486439	144.522	32.5636	2.73149e-33	12.0218	TRIG	BUD13, AP006216.11, AP006216.10	intron_variant, downstream_gene_variant, upstream_gene_variant
rs138659167	11	71146886	C	G	0.0114335	0.169168	0.0239123	50.0485	11.8239	1.50003e-12	7.07452	VITD	DHCR7	splice_acceptor_variant, missense_variant, downstream_gene_variant, intron_variant
rs140231532	11	116697301	C	T	0.0158041	0.194802	0.0193846	100.988	23.0337	9.25337e-24	10.0493	TRIG	APOC3, APOA4	upstream_gene_variant
rs141351422	11	116929062	C	T	0.0107776	0.18856	0.0235705	63.9976	14.9046	1.24566e-15	7.99983	TRIG	SIK3	intron_variant, intron_variant&NMD_transcript_variant, intron_variant&non_coding_transcript_variant
rs144018203	11	116916060	G	C	0.00901374	-0.136589	0.0242739	31.6629	7.73662	1.83392e-08	-5.62699	APOA	SIK3	intron_variant, intron_variant&NMD_transcript_variant, intron_variant&non_coding_transcript_variant
rs144018203	11	116916060	G	C	0.00901374	-0.177073	0.0239866	54.4966	12.8077	1.55704e-13	-7.38216	HDL	SIK3	intron_variant, intron_variant&NMD_transcript_variant, intron_variant&non_coding_transcript_variant
rs144018203	11	116916060	G	C	0.00901374	0.263939	0.0257036	105.443	24.0103	9.76562e-25	10.2686	TRIG	SIK3	intron_variant, intron_variant&NMD_transcript_variant, intron_variant&non_coding_transcript_variant
rs1562444	11	92715849	A	G	0.492305	-0.0385588	0.00475542	65.7458	15.2899	5.12979e-16	-8.10839	HBA1C	MTNR1B	3_prime_UTR_variant, intron_variant, downstream_gene_variant
rs16930180	11	14472277	C	A	0.139089	0.0611229	0.00732511	69.6273	16.1449	7.16308e-17	8.3443	VITD	COPB1	downstream_gene_variant, intron_variant&non_coding_transcript_variant
rs16930367	11	14622982	G	A	0.0474959	0.0668477	0.0119818	31.1263	7.61659	2.41774e-08	5.5791	VITD	PSMA1	intron_variant
rs174610	11	61627833	A	G	0.463237	0.0301537	0.00471906	40.8293	9.77956	1.66127e-10	6.38977	ALP	FADS2	intron_variant, upstream_gene_variant, intron_variant&non_coding_transcript_variant
rs174610	11	61627833	A	G	0.463237	-0.0280526	0.00485282	33.4163	8.12845	7.43961e-09	-5.78068	APOB	FADS2	intron_variant, upstream_gene_variant, intron_variant&non_coding_transcript_variant
rs174610	11	61627833	A	G	0.463237	-0.0274856	0.00452973	36.8185	8.88722	1.29652e-09	-6.06782	HDL	FADS2	intron_variant, upstream_gene_variant, intron_variant&non_coding_transcript_variant
rs1784042	11	117065476	G	A	0.427622	-0.0389033	0.0046441	70.1729	16.265	5.4325e-17	-8.37693	APOA	SIDT2, TAGLN	intron_variant, upstream_gene_variant, downstream_gene_variant
rs1790324	11	71150520	T	G	0.181706	-0.0902872	0.0065694	188.887	42.2546	5.56416e-43	-13.7436	VITD	DHCR7	intron_variant, upstream_gene_variant, downstream_gene_variant, intron_variant&non_coding_transcript_variant
rs181009570	11	117096995	G	A	0.0119061	0.15644	0.022381	48.8578	11.5603	2.75233e-12	6.98986	TRIG	PCSK7	intron_variant, downstream_gene_variant, upstream_gene_variant, non_coding_transcript_exon_variant
rs186782888	11	117086701	G	A	0.0108598	0.194064	0.0234827	68.2957	15.8516	1.40734e-16	8.26413	TRIG	PCSK7	intron_variant, intron_variant&non_coding_transcript_variant, downstream_gene_variant, non_coding_transcript_exon_variant
rs187929675	11	117111368	C	T	0.0130074	0.120014	0.0202387	35.1639	8.51842	3.03096e-09	5.92993	APOA	RNF214	intron_variant, intron_variant&non_coding_transcript_variant, downstream_gene_variant
rs187929675	11	117111368	C	T	0.0130074	0.124521	0.0199992	38.7668	9.32096	4.77573e-10	6.2263	HDL	RNF214	intron_variant, intron_variant&non_coding_transcript_variant, downstream_gene_variant
rs187929675	11	117111368	C	T	0.0130074	-0.151611	0.0214308	50.0482	11.8239	1.50003e-12	-7.07444	TRIG	RNF214	intron_variant, intron_variant&non_coding_transcript_variant, downstream_gene_variant
rs1879888	11	14679247	A	G	0.499186	-0.0540187	0.00506563	113.716	25.8228	1.50383e-26	-10.6638	VITD	PDE3B	intron_variant, intron_variant&non_coding_transcript_variant
rs192650338	11	14397864	C	T	0.0149429	-0.126093	0.0208762	36.4819	8.81223	1.54088e-09	-6.04004	VITD	.	intergenic_variant
rs192957064	11	116538072	G	A	0.0118662	0.205905	0.0223981	84.5109	19.4178	3.8212e-20	9.19297	TRIG	.	intergenic_variant
rs2105610	11	116535126	T	C	0.100053	0.0552051	0.00809492	46.5086	11.0399	9.12221e-12	6.81972	TRIG	.	intergenic_variant
rs2298475	11	126278203	T	C	0.074765	-0.0856352	0.00895152	91.5191	20.9566	1.1051e-21	-9.56655	ALP	ST3GAL4	splice_region_variant&synonymous_variant, splice_region_variant&non_coding_transcript_exon_variant, splice_region_variant&5_prime_UTR_variant, downstream_gene_variant, splice_region_variant&synonymous_variant&NMD_transcript_variant, upstream_gene_variant
rs240541	11	126209383	A	G	0.423621	-0.033767	0.0047899	49.6974	11.7462	1.79391e-12	-7.04963	ALP	DCPS	intron_variant, intron_variant&non_coding_transcript_variant
rs35826789	11	66867155	T	A	0.0875255	0.0524897	0.00851672	37.9842	9.14679	7.13198e-10	6.16314	IGF1	.	intergenic_variant
rs4281505	11	14800660	A	G	0.497895	-0.0553091	0.00506746	119.127	27.0078	9.822e-28	-10.9146	VITD	PDE3B	intron_variant, downstream_gene_variant
rs4753126	11	93862020	T	C	0.499112	-0.0264298	0.0048397	29.8228	7.32479	4.7338e-08	-5.46104	ALT	PANX1	upstream_gene_variant
rs4935968	11	126290950	T	C	0.482945	-0.0426501	0.00472823	81.3661	18.7269	1.87543e-19	-9.02031	ALP	KIRREL3, ST3GAL4	downstream_gene_variant, intron_variant&non_coding_transcript_variant
rs519794	11	116859453	C	T	0.103618	0.108908	0.00798449	186.047	41.6348	2.31846e-42	13.6399	TRIG	SIK3	intron_variant, intron_variant&NMD_transcript_variant, intron_variant&non_coding_transcript_variant
rs543746207	11	14133656	A	G	0.0134066	-0.284277	0.0220466	166.266	37.3152	4.83949e-38	-12.8944	VITD	SPON1	intron_variant&non_coding_transcript_variant
rs546202	11	65510024	C	T	0.452866	0.0255838	0.00420347	37.0437	8.93738	1.1551e-09	6.08635	URT	RP11-770G2.2	upstream_gene_variant
rs55733296	11	30754837	G	A	0.0386676	0.0872875	0.0105501	68.4523	15.8861	1.29987e-16	8.27362	CREA	.	intergenic_variant
rs55733296	11	30754837	G	A	0.0386676	0.11216	0.0126269	78.9012	18.1851	6.5298e-19	8.88262	URA	.	intergenic_variant
rs55733296	11	30754837	G	A	0.0386676	0.076085	0.0108337	49.3224	11.6632	2.1717e-12	7.02299	URT	.	intergenic_variant
rs559566	11	64581658	A	G	0.427493	0.0289822	0.0042125	47.3351	11.2231	5.98274e-12	6.88005	URT	MEN1	upstream_gene_variant
rs561193	11	64353029	A	G	0.283056	0.0495786	0.00465044	113.658	25.8101	1.54846e-26	10.6611	URT	.	intergenic_variant
rs61734601	11	67184725	G	A	0.0844624	0.0529856	0.00860529	37.9127	9.13088	7.3981e-10	6.15733	IGF1	CARNS1, PPP1CA	intron_variant, upstream_gene_variant, downstream_gene_variant, intron_variant&non_coding_transcript_variant, non_coding_transcript_exon_variant
rs61907566	11	116748905	C	G	0.431715	-0.0458435	0.00465032	97.1825	22.1991	6.32266e-23	-9.85814	APOA	SIK3	intron_variant, intron_variant&NMD_transcript_variant, upstream_gene_variant
rs61907566	11	116748905	C	G	0.431715	-0.0274886	0.00492422	31.1624	7.62467	2.37318e-08	-5.58233	TRIG	SIK3	intron_variant, intron_variant&NMD_transcript_variant, upstream_gene_variant
rs68036074	11	64377381	C	T	0.0368909	-0.063169	0.0111047	32.3588	7.89221	1.28171e-08	-5.68849	URT	NRXN2	intron_variant, intron_variant&non_coding_transcript_variant
rs7126214	11	116679711	G	A	0.10094	-0.052684	0.00805794	42.7474	10.2056	6.22874e-11	-6.53815	TRIG	AP006216.5	downstream_gene_variant
rs72636977	11	290891	T	C	0.0515529	0.072641	0.0106685	46.3611	11.0072	9.83558e-12	6.80892	ALP	ATHL1, RP11-326C3.2	upstream_gene_variant, synonymous_variant, non_coding_transcript_exon_variant, intron_variant&NMD_transcript_variant, downstream_gene_variant
rs7480431	11	14155673	A	G	0.432595	-0.0349724	0.00511816	46.6899	11.0801	8.31572e-12	-6.833	VITD	SPON1, RNA5SP332	intron_variant&non_coding_transcript_variant, upstream_gene_variant
rs75944694	11	64581746	C	T	0.0357041	0.0663112	0.0112562	34.7047	8.416	3.83707e-09	5.89108	URT	MEN1	upstream_gene_variant
rs77231260	11	64540800	T	C	0.0438079	-0.0591134	0.0102217	33.4445	8.13473	7.3328e-09	-5.78313	URT	SF1	intron_variant, intron_variant&NMD_transcript_variant, downstream_gene_variant, non_coding_transcript_exon_variant, upstream_gene_variant
rs78110496	11	15047402	A	G	0.0687499	-0.0635501	0.00997495	40.5893	9.72622	1.87837e-10	-6.37097	VITD	CALCB	intron_variant
rs7929308	11	64329106	C	T	0.453645	0.0530573	0.00422474	157.721	35.4485	3.56041e-36	12.5587	URT	SLC22A11	intron_variant, upstream_gene_variant, intron_variant&non_coding_transcript_variant
rs7931398	11	116879676	T	C	0.257326	0.0579423	0.00523704	122.411	27.7266	1.87672e-28	11.0639	APOA	SIK3	intron_variant, intron_variant&NMD_transcript_variant, intron_variant&non_coding_transcript_variant
rs7931398	11	116879676	T	C	0.257326	0.0298784	0.00517506	33.3337	8.10999	7.76265e-09	5.77354	HDL	SIK3	intron_variant, intron_variant&NMD_transcript_variant, intron_variant&non_coding_transcript_variant
rs93139	11	9759608	C	T	0.432905	-0.0268264	0.00471565	32.3624	7.89301	1.27935e-08	-5.6888	SBP	SWAP70	intron_variant, intron_variant&non_coding_transcript_variant, intron_variant&NMD_transcript_variant
rs1053051	12	107367225	T	C	0.477448	0.0278117	0.00492265	31.9195	7.794	1.60694e-08	5.64974	PHOS	MTERFD3, C12orf23	downstream_gene_variant, 3_prime_UTR_variant, intron_variant&non_coding_transcript_variant
rs10841769	12	21395019	G	A	0.456725	0.0313587	0.00427226	53.8766	12.6706	2.13501e-13	7.34007	TBIL	SLCO1B1	downstream_gene_variant
rs10844075	12	32121276	T	G	0.453848	-0.0284698	0.00482639	34.7955	8.43626	3.66218e-09	-5.89878	IGF1	KIAA1551	intron_variant, intron_variant&non_coding_transcript_variant
rs10849081	12	4597481	A	C	0.190368	0.0702353	0.00624362	126.543	28.631	2.33884e-29	11.2491	PHOS	C12orf4	3_prime_UTR_variant, downstream_gene_variant
rs11045532	12	20981734	T	C	0.456853	0.0294485	0.00426702	47.6295	11.2883	5.14873e-12	6.90142	TBIL	SLCO1B3, LST3, SLCO1B7	intron_variant
rs11057223	12	123755055	T	C	0.0912138	0.0492621	0.00796193	38.2816	9.21298	6.12379e-10	6.18721	APOA	CDK2AP1	intron_variant, upstream_gene_variant
rs11065387	12	121427653	G	C	0.0238773	-0.0854027	0.015268	31.2881	7.65278	2.22444e-08	-5.59357	GGT	HNF1A	intron_variant, intron_variant&NMD_transcript_variant
rs111677829	12	21236976	G	T	0.0347499	-0.0688961	0.0116533	34.9535	8.47151	3.37668e-09	-5.91215	TBIL	LST3, SLCO1B7, RP11-125O5.2, SLCO1B3	intron_variant, intron_variant&NMD_transcript_variant
rs11611673	12	121451150	A	G	0.0247115	-0.0875482	0.0158803	30.3933	7.45253	3.52752e-08	-5.51301	CRP	C12orf43	intron_variant, intron_variant&non_coding_transcript_variant, intron_variant&NMD_transcript_variant, upstream_gene_variant
rs1169293	12	121426545	A	G	0.07237	-0.0569243	0.00878478	41.9887	10.0372	9.1791e-11	-6.47988	SHBG	HNF1A	intron_variant, intron_variant&NMD_transcript_variant
rs1169298	12	121428669	A	G	0.0269448	-0.0900219	0.0152043	35.056	8.49437	3.20354e-09	-5.92082	CRP	HNF1A	intron_variant, intron_variant&NMD_transcript_variant
rs1169298	12	121428669	A	G	0.0269448	-0.100225	0.0143842	48.5492	11.492	3.22107e-12	-6.96771	GGT	HNF1A	intron_variant, intron_variant&NMD_transcript_variant
rs116980448	12	21180864	A	G	0.034497	-0.121651	0.0117156	107.82	24.5311	2.94374e-25	-10.3837	TBIL	LST3, SLCO1B7, SLCO1B3	intron_variant
rs117038277	12	21791062	T	G	0.0308758	0.0741776	0.0122963	36.3912	8.79201	1.61432e-09	6.03251	TBIL	LDHB	intron_variant, downstream_gene_variant, intron_variant&non_coding_transcript_variant, upstream_gene_variant
rs117071055	12	21040276	T	C	0.0284347	-0.0838408	0.0128705	42.4347	10.1362	7.30802e-11	-6.51418	TBIL	SLCO1B3, LST3, SLCO1B7	intron_variant
rs117474805	12	20889186	C	A	0.0386676	-0.0717395	0.0110209	42.3723	10.1223	7.54571e-11	-6.5094	TBIL	SLCO1C1	intron_variant, intron_variant&NMD_transcript_variant
rs117924672	12	21406025	T	C	0.0274061	0.146204	0.0131569	123.484	27.9615	1.0927e-28	11.1123	TBIL	.	intergenic_variant
rs12231212	12	21483591	A	C	0.324344	-0.0318279	0.00454881	48.9576	11.5824	2.61577e-12	-6.99697	TBIL	SLCO1A2	intron_variant, downstream_gene_variant, intron_variant&non_coding_transcript_variant, intron_variant&NMD_transcript_variant
rs12313279	12	102846504	G	A	0.287353	0.0654153	0.00528359	153.285	34.4791	3.31818e-35	12.3808	IGF1	IGF1	intron_variant
rs1265565	12	111715197	C	T	0.376945	0.0360239	0.00507957	50.2954	11.8786	1.32251e-12	7.09192	DBP	CUX2	intron_variant
rs141881700	12	101056213	G	A	0.0112793	-0.125335	0.0216113	33.6341	8.17707	6.65166e-09	-5.79951	SHBG	.	intergenic_variant
rs146219397	12	21260802	T	C	0.0103373	-0.207821	0.021117	96.8527	22.1268	7.46793e-23	-9.84141	TBIL	RP11-125O5.2	intron_variant&NMD_transcript_variant
rs1621710	12	48386060	T	C	0.486375	0.0311759	0.00476248	42.8522	10.2289	5.90337e-11	6.54615	HBA1C	COL2A1	intron_variant, upstream_gene_variant
rs1672907	12	125283403	A	G	0.494192	0.0299874	0.0046188	42.152	10.0734	8.44501e-11	6.49247	APOA	SCARB1	intron_variant, intron_variant&non_coding_transcript_variant
rs1672907	12	125283403	A	G	0.494192	0.0307611	0.0045645	45.4169	10.7979	1.59258e-11	6.7392	HDL	SCARB1	intron_variant, intron_variant&non_coding_transcript_variant
rs17434647	12	121579024	T	G	0.122628	0.0594058	0.00750875	62.5925	14.5948	2.54214e-15	7.91154	CRP	P2RX7	intron_variant&NMD_transcript_variant, intron_variant, intron_variant&non_coding_transcript_variant
rs17434647	12	121579024	T	G	0.122628	0.0492099	0.00710372	47.9881	11.3677	4.28845e-12	6.92734	GGT	P2RX7	intron_variant&NMD_transcript_variant, intron_variant, intron_variant&non_coding_transcript_variant
rs185474100	12	3997689	G	A	0.00842185	0.151711	0.0276873	30.0242	7.3699	4.26678e-08	5.47944	CAL	RP11-664D1.1	intron_variant&non_coding_transcript_variant
rs1910181	12	21185656	G	T	0.424055	0.0308942	0.00429769	51.6755	12.1839	6.54787e-13	7.18856	TBIL	LST3, SLCO1B7, SLCO1B3	intron_variant
rs1910202	12	21252930	A	G	0.031596	0.0777846	0.0122649	40.2215	9.64448	2.26736e-10	6.34205	TBIL	RP11-125O5.2	intron_variant&NMD_transcript_variant
rs2258043	12	121451425	T	C	0.489085	0.03545	0.00471166	56.6088	13.2743	5.31741e-14	7.52389	ALP	C12orf43	intron_variant, intron_variant&non_coding_transcript_variant, intron_variant&NMD_transcript_variant, upstream_gene_variant
rs2258043	12	121451425	T	C	0.489085	-0.0907976	0.00492375	340.061	75.2084	6.18871e-76	-18.4407	CRP	C12orf43	intron_variant, intron_variant&non_coding_transcript_variant, intron_variant&NMD_transcript_variant, upstream_gene_variant
rs2258043	12	121451425	T	C	0.489085	-0.0696241	0.00465815	223.404	49.7861	1.63644e-50	-14.9467	GGT	C12orf43	intron_variant, intron_variant&non_coding_transcript_variant, intron_variant&NMD_transcript_variant, upstream_gene_variant
rs2567990	12	121610411	G	A	0.0529933	-0.0685355	0.0109992	38.8244	9.33377	4.63692e-10	-6.23095	CRP	P2RX7	intron_variant&NMD_transcript_variant, intron_variant, intron_variant&non_coding_transcript_variant
rs2708081	12	121463288	T	C	0.498345	0.0682896	0.00493861	191.205	42.7607	1.735e-43	13.8277	CRP	OASL	intron_variant
rs2708081	12	121463288	T	C	0.498345	0.0564947	0.00467221	146.208	32.9321	1.16923e-33	12.0916	GGT	OASL	intron_variant
rs35411407	12	4708908	T	C	0.0232725	0.100453	0.0164149	37.4493	9.0277	9.3821e-10	6.11962	PHOS	DYRK4, RP11-234B24.5	synonymous_variant, downstream_gene_variant, non_coding_transcript_exon_variant
rs4298983	12	121385479	T	C	0.030388	-0.093677	0.0143841	42.4133	10.1314	7.38924e-11	-6.51254	CRP	.	intergenic_variant
rs4298983	12	121385479	T	C	0.030388	-0.108134	0.0136082	63.1434	14.7163	1.92176e-15	-7.94624	GGT	.	intergenic_variant
rs4760699	12	48619044	A	G	0.34934	0.0379695	0.00498882	57.9259	13.5651	2.72207e-14	7.61092	HBA1C	.	intergenic_variant
rs4766897	12	112179471	C	T	0.337958	0.0318599	0.00521761	37.2859	8.99132	1.02019e-09	6.10622	DBP	ACAD10	intron_variant, intron_variant&non_coding_transcript_variant, upstream_gene_variant
rs4766897	12	112179471	C	T	0.337958	0.0289068	0.00451409	41.0072	9.8191	1.5167e-10	6.40368	TBIL	ACAD10	intron_variant, intron_variant&non_coding_transcript_variant, upstream_gene_variant
rs532727118	12	21437223	G	A	0.0143236	-0.187679	0.0179829	108.921	24.7725	1.6885e-25	-10.4365	TBIL	SLCO1A2	intron_variant, intron_variant&non_coding_transcript_variant, intron_variant&NMD_transcript_variant
rs592215	12	121240434	G	A	0.0265666	-0.0820047	0.0145175	31.9075	7.79132	1.61689e-08	-5.64868	GGT	SPPL3	intron_variant
rs618482	12	121200609	T	C	0.496221	0.0351964	0.00490695	51.4486	12.1337	7.35021e-13	7.17277	CRP	SPPL3, RP11-173P15.7	3_prime_UTR_variant, downstream_gene_variant, upstream_gene_variant
rs618482	12	121200609	T	C	0.496221	0.0257325	0.00464226	30.7259	7.52699	2.97173e-08	5.5431	GGT	SPPL3, RP11-173P15.7	3_prime_UTR_variant, downstream_gene_variant, upstream_gene_variant
rs6538696	12	96374683	T	C	0.47696	-0.0292122	0.00504712	33.4998	8.14708	7.12722e-09	-5.78789	VITD	HAL	intron_variant, intron_variant&NMD_transcript_variant, downstream_gene_variant, upstream_gene_variant
rs6539288	12	107297862	A	T	0.491284	0.0296807	0.00492324	36.3452	8.78176	1.65287e-09	6.02869	PHOS	EEF1B2P4	upstream_gene_variant
rs661647	12	121282659	C	T	0.494034	0.0340149	0.00490322	48.1257	11.3982	3.99761e-12	6.93726	CRP	SPPL3, ARF1P2	intron_variant, downstream_gene_variant
rs661647	12	121282659	C	T	0.494034	0.0262282	0.00463873	31.9697	7.80521	1.56599e-08	5.65418	GGT	SPPL3, ARF1P2	intron_variant, downstream_gene_variant
rs7134565	12	48630024	T	C	0.464727	-0.0315201	0.00475521	43.9377	10.4698	3.39e-11	-6.62854	HBA1C	RP11-370I10.2	intron_variant&non_coding_transcript_variant
rs71454665	12	121198711	C	T	0.0570452	0.085343	0.0106118	64.6787	15.0547	8.81658e-16	8.04227	CRP	SPPL3, RP11-173P15.7	downstream_gene_variant, intron_variant&non_coding_transcript_variant
rs71454665	12	121198711	C	T	0.0570452	0.0594693	0.0100393	35.0893	8.5018	3.1492e-09	5.92365	GGT	SPPL3, RP11-173P15.7	downstream_gene_variant, intron_variant&non_coding_transcript_variant
rs7294902	12	112354531	T	C	0.173675	-0.0371563	0.00650416	32.6348	7.95387	1.11206e-08	-5.7127	DBP	.	intergenic_variant
rs7299185	12	4672394	T	G	0.273738	0.0492173	0.00550331	79.9811	18.4225	3.78007e-19	8.94322	PHOS	RAD51AP1, DYRK4	downstream_gene_variant, intron_variant&NMD_transcript_variant, upstream_gene_variant, intron_variant
rs73062454	12	21144925	T	C	0.0451642	-0.0700747	0.0102225	46.99	11.1466	7.1351e-12	-6.85495	TBIL	LST3, SLCO1B3, SLCO1B7	intron_variant
rs73069053	12	21468230	A	G	0.0147699	0.223143	0.0176513	159.814	35.9058	1.24222e-36	12.6417	TBIL	SLCO1A2	intron_variant, downstream_gene_variant, intron_variant&non_coding_transcript_variant, intron_variant&NMD_transcript_variant
rs73069318	12	20886240	T	C	0.00656884	0.312465	0.0263685	140.421	31.6669	2.15328e-32	11.8499	TBIL	SLCO1C1	intron_variant, intron_variant&NMD_transcript_variant
rs73079474	12	21340207	T	C	0.0134878	0.273982	0.0184613	220.252	49.0986	7.96893e-50	14.8409	TBIL	SLCO1B1	intron_variant
rs73405652	12	121054157	C	A	0.0764356	0.0599863	0.00924271	42.1217	10.0667	8.5763e-11	6.49012	CRP	.	intergenic_variant
rs73405652	12	121054157	C	A	0.0764356	0.0565631	0.00874414	41.8439	10.005	9.88553e-11	6.46869	GGT	.	intergenic_variant
rs76151543	12	21179263	A	G	0.023206	0.113455	0.0141551	64.2422	14.9585	1.10027e-15	8.01513	TBIL	LST3, SLCO1B7, SLCO1B3	intron_variant
rs7972145	12	103477476	T	C	0.494112	-0.0366334	0.00454502	64.9653	15.1179	7.62255e-16	-8.06012	SHBG	RP11-328J6.1	intron_variant&non_coding_transcript_variant
rs838880	12	125261593	T	C	0.307591	0.0342937	0.00495775	47.8477	11.3366	4.60681e-12	6.91719	APOA	SCARB1	downstream_gene_variant, 3_prime_UTR_variant
rs838880	12	125261593	T	C	0.307591	0.0408002	0.00489946	69.3471	16.0832	8.25658e-17	8.32749	HDL	SCARB1	downstream_gene_variant, 3_prime_UTR_variant
rs9645811	12	48679236	G	A	0.462725	-0.0297514	0.00475715	39.113	9.39798	3.99963e-10	-6.25404	HBA1C	RP11-370I10.2	upstream_gene_variant
rs303936	13	72373889	A	C	0.398755	-0.0313352	0.00496625	39.8115	9.55332	2.79692e-10	-6.30963	URA	DACH1	intron_variant
rs438674	13	113405997	A	C	0.186617	0.0436534	0.00612023	50.8744	12.0067	9.84691e-13	7.13264	HBA1C	ATP11A, ATP11A-AS1	intron_variant, intron_variant&non_coding_transcript_variant
rs4773144	13	110960712	A	G	0.434112	-0.0289388	0.00507588	32.504	7.92465	1.18946e-08	-5.70124	TPROT	COL4A2, COL4A1	intron_variant, upstream_gene_variant, intron_variant&non_coding_transcript_variant
rs6492723	13	95273125	T	A	0.420811	0.0274282	0.00476425	33.1441	8.06765	8.55756e-09	5.75709	ALP	GPR180	intron_variant
rs9533108	13	43024710	T	C	0.47403	-0.0298441	0.00471687	40.0322	9.60239	2.4981e-10	-6.3271	ALP	.	intergenic_variant
rs10134692	14	93912668	A	C	0.440737	-0.0308222	0.00509972	36.5286	8.82263	1.50442e-09	-6.0439	BMI	UNC79	intron_variant
rs11624069	14	103563547	T	C	0.410015	0.107558	0.00473405	516.201	113.547	2.83792e-114	22.7201	GGT	EXOC3L4, RP11-736N17.8	upstream_gene_variant, intron_variant&non_coding_transcript_variant
rs150854933	14	103614513	C	T	0.00872348	0.152112	0.0251088	36.7008	8.86099	1.37724e-09	6.05812	GGT	RPL21P12	upstream_gene_variant
rs2183193	14	103606276	T	C	0.305494	0.0314965	0.00504583	38.9636	9.36474	4.31777e-10	6.24209	GGT	TNFAIP2, RP11-736N17.4	downstream_gene_variant, non_coding_transcript_exon_variant
rs2283371	14	73015668	A	G	0.331652	-0.0274774	0.00500285	30.166	7.40164	3.96607e-08	-5.49235	ALP	RGS6, RP3-514A23.2	intron_variant, intron_variant&non_coding_transcript_variant, intron_variant&NMD_transcript_variant, downstream_gene_variant
rs2283371	14	73015668	A	G	0.331652	0.0302974	0.00520895	33.8306	8.22095	6.01243e-09	5.81641	CRP	RGS6, RP3-514A23.2	intron_variant, intron_variant&non_coding_transcript_variant, intron_variant&NMD_transcript_variant, downstream_gene_variant
rs35459127	14	103442995	T	C	0.0296271	-0.0859341	0.013795	38.8047	9.32939	4.68393e-10	-6.22937	GGT	CDC42BPB	intron_variant
rs8013827	14	105970176	A	G	0.252885	-0.0356262	0.00573811	38.548	9.27227	5.34232e-10	-6.2087	ALB	C14orf80	downstream_gene_variant
rs9989163	14	103235012	G	A	0.47562	-0.0360667	0.00505834	50.8389	11.9988	1.00277e-12	-7.13015	TPROT	RP11-661D19.3	downstream_gene_variant
rs11857386	15	58721168	C	G	0.478388	0.0522585	0.0046101	128.497	29.0586	8.73776e-30	11.3357	APOA	LIPC, ALDH1A2	upstream_gene_variant, intron_variant, intron_variant&non_coding_transcript_variant
rs11857386	15	58721168	C	G	0.478388	0.0333811	0.00495644	45.3588	10.785	1.64059e-11	6.73489	CHO	LIPC, ALDH1A2	upstream_gene_variant, intron_variant, intron_variant&non_coding_transcript_variant
rs11857386	15	58721168	C	G	0.478388	0.042647	0.00454704	87.967	20.1768	6.6558e-21	9.37907	HDL	LIPC, ALDH1A2	upstream_gene_variant, intron_variant, intron_variant&non_coding_transcript_variant
rs12900738	15	58635273	T	A	0.133338	-0.0477204	0.00676671	49.734	11.7543	1.76076e-12	-7.05223	APOA	ALDH1A2	intron_variant, intron_variant&non_coding_transcript_variant
rs12900738	15	58635273	T	A	0.133338	-0.0410551	0.00667416	37.8391	9.11449	7.68263e-10	-6.15135	HDL	ALDH1A2	intron_variant, intron_variant&non_coding_transcript_variant
rs12904989	15	51262058	G	A	0.495265	-0.0277096	0.00491454	31.7903	7.76511	1.71747e-08	-5.63829	PHOS	AP4E1	intron_variant, intron_variant&NMD_transcript_variant
rs1436959	15	62338820	T	C	0.490674	0.0272696	0.00477264	32.6469	7.95658	1.10515e-08	5.71373	IGF1	VPS13C	intron_variant
rs1461410	15	53984796	T	C	0.494857	-0.0232057	0.00406046	32.6617	7.95989	1.09676e-08	-5.71504	CREA	WDR72	intron_variant
rs151291132	15	44842210	A	G	0.0242438	0.111122	0.016193	47.0917	11.1692	6.7733e-12	6.86235	ALB	EIF3J	intron_variant, upstream_gene_variant
rs151291132	15	44842210	A	G	0.0242438	-0.107719	0.015567	47.8827	11.3444	4.52481e-12	-6.9197	IGF1	EIF3J	intron_variant, upstream_gene_variant
rs151291132	15	44842210	A	G	0.0242438	0.0943981	0.016432	33.0022	8.03596	9.20534e-09	5.74477	TPROT	EIF3J	intron_variant, upstream_gene_variant
rs151291132	15	44842210	A	G	0.0242438	0.109461	0.0157464	48.3238	11.4421	3.61327e-12	6.95149	TRIG	EIF3J	intron_variant, upstream_gene_variant
rs1706798	15	45611414	C	T	0.338216	0.0447379	0.00430527	107.982	24.5666	2.71269e-25	10.3914	CREA	CTD-2651B20.5	downstream_gene_variant
rs1717200	15	41368334	A	G	0.475103	0.022978	0.00408616	31.6223	7.72755	1.87262e-08	5.62337	CREA	INO80	intron_variant, intron_variant&NMD_transcript_variant, upstream_gene_variant
rs17269250	15	58725986	T	G	0.0158956	0.101885	0.0183839	30.7147	7.52448	2.98896e-08	5.54208	APOA	LIPC, ALDH1A2, RP11-355N15.1	intron_variant, intron_variant&non_coding_transcript_variant, downstream_gene_variant
rs17821316	15	58703069	C	A	0.483548	0.0754583	0.00459769	269.362	59.806	1.56315e-60	16.4122	APOA	LIPC, ALDH1A2	intron_variant, intron_variant&non_coding_transcript_variant
rs17821316	15	58703069	C	A	0.483548	0.0295703	0.0049431	35.7861	8.65716	2.20212e-09	5.98214	CHO	LIPC, ALDH1A2	intron_variant, intron_variant&non_coding_transcript_variant
rs17821316	15	58703069	C	A	0.483548	0.064454	0.0045348	202.014	45.1198	7.58927e-46	14.2132	HDL	LIPC, ALDH1A2	intron_variant, intron_variant&non_coding_transcript_variant
rs2012384	15	44458025	T	C	0.0697069	0.0575718	0.00976359	34.7696	8.43049	3.71116e-09	5.89658	ALB	FRMD5	intron_variant, intron_variant&NMD_transcript_variant
rs2643718	15	45794662	T	C	0.47648	0.0373146	0.00408792	83.3207	19.1564	6.9759e-20	9.12802	CREA	SLC30A4, RP11-519G16.3	intron_variant, downstream_gene_variant, intron_variant&non_coding_transcript_variant
rs339985	15	60918103	A	T	0.445833	0.0314772	0.00468105	45.2176	10.7537	1.76319e-11	6.72439	GGT	RORA, RP11-219B17.1	intron_variant, intron_variant&NMD_transcript_variant, intron_variant&non_coding_transcript_variant
rs35511894	15	58723709	C	T	0.0179165	0.141457	0.0174005	66.0879	15.3653	4.31221e-16	8.12948	APOA	LIPC, ALDH1A2, RP11-355N15.1	upstream_gene_variant, intron_variant, intron_variant&non_coding_transcript_variant, downstream_gene_variant
rs35511894	15	58723709	C	T	0.0179165	0.12139	0.0171625	50.0265	11.8191	1.5167e-12	7.07298	HDL	LIPC, ALDH1A2, RP11-355N15.1	upstream_gene_variant, intron_variant, intron_variant&non_coding_transcript_variant, downstream_gene_variant
rs4886755	15	76298132	G	A	0.489257	-0.0285594	0.00405172	49.6843	11.7433	1.80593e-12	-7.04871	CREA	NRG4	synonymous_variant, intron_variant, intron_variant&NMD_transcript_variant, non_coding_transcript_exon_variant
rs4886755	15	76298132	G	A	0.489257	-0.0264349	0.00415192	40.5375	9.71471	1.92881e-10	-6.36691	URT	NRG4	synonymous_variant, intron_variant, intron_variant&NMD_transcript_variant, non_coding_transcript_exon_variant
rs60808669	15	58699199	T	G	0.0289908	-0.0991623	0.0137462	52.0392	12.2644	5.44001e-13	-7.2138	APOA	LIPC, ALDH1A2	upstream_gene_variant, intron_variant, intron_variant&non_coding_transcript_variant
rs60808669	15	58699199	T	G	0.0289908	-0.0764159	0.0135582	31.7663	7.75973	1.73888e-08	-5.63614	HDL	LIPC, ALDH1A2	upstream_gene_variant, intron_variant, intron_variant&non_coding_transcript_variant
rs62001697	15	58632415	C	T	0.0331185	0.0766895	0.0128656	35.5313	8.60034	2.50992e-09	5.96082	APOA	ALDH1A2	intron_variant, intron_variant&non_coding_transcript_variant
rs62001697	15	58632415	C	T	0.0331185	0.0740313	0.0126896	34.0354	8.26666	5.41178e-09	5.83401	HDL	ALDH1A2	intron_variant, intron_variant&non_coding_transcript_variant
rs7166370	15	60959089	G	C	0.440898	0.0394147	0.00469815	70.3821	16.311	4.88652e-17	8.38941	GGT	RORA	intron_variant, intron_variant&NMD_transcript_variant, intron_variant&non_coding_transcript_variant
rs7176909	15	96707171	G	C	0.475327	-0.0337828	0.00454868	55.1593	12.9541	1.11148e-13	-7.42695	SHBG	NR2F2-AS1	intron_variant&non_coding_transcript_variant
rs72740858	15	58705943	A	G	0.0228601	0.123572	0.0154604	63.8849	14.8797	1.31917e-15	7.99281	APOA	LIPC, ALDH1A2	intron_variant, intron_variant&non_coding_transcript_variant
rs72740858	15	58705943	A	G	0.0228601	0.102544	0.015249	45.2205	10.7544	1.76035e-11	6.72464	HDL	LIPC, ALDH1A2	intron_variant, intron_variant&non_coding_transcript_variant
rs78893833	15	58688159	A	G	0.0229212	0.0983776	0.0153866	40.8797	9.79077	1.61894e-10	6.39372	APOA	ALDH1A2	intron_variant, intron_variant&non_coding_transcript_variant
rs79447951	15	58735638	T	G	0.0137161	0.11601	0.0197923	34.3555	8.3381	4.59092e-09	5.86137	APOA	LIPC, ALDH1A2, RP11-355N15.1	intron_variant, intron_variant&non_coding_transcript_variant
rs79787170	15	58754942	A	G	0.029472	0.0838374	0.0136244	37.8649	9.12024	7.58158e-10	6.15347	APOA	LIPC, ALDH1A2, RP11-355N15.1	intron_variant, intron_variant&non_coding_transcript_variant
rs79787170	15	58754942	A	G	0.029472	0.0764562	0.0134381	32.3705	7.89481	1.27406e-08	5.68951	HDL	LIPC, ALDH1A2, RP11-355N15.1	intron_variant, intron_variant&non_coding_transcript_variant
rs8032477	15	99254554	T	C	0.396812	0.0335903	0.00427514	61.7342	14.4055	3.93097e-15	7.85712	URT	IGF1R	intron_variant, intron_variant&non_coding_transcript_variant
rs961229	15	96725043	G	A	0.462031	0.0428406	0.00455218	88.5673	20.3086	4.9136e-21	9.41101	SHBG	NR2F2-AS1	intron_variant&non_coding_transcript_variant
rs10521222	16	51158710	C	T	0.0472596	-0.102619	0.0115732	78.6224	18.1238	7.51969e-19	-8.86695	CRP	.	intergenic_variant
rs11075987	16	53815161	T	G	0.489238	0.0498342	0.00505887	97.0394	22.1677	6.79673e-23	9.85086	BMI	FTO	intron_variant, intron_variant&NMD_transcript_variant, intron_variant&non_coding_transcript_variant
rs111208266	16	1786305	G	A	0.016438	-0.113476	0.0187494	36.6294	8.8451	1.42856e-09	-6.05225	IGF1	MAPK8IP3, MIR3177	intron_variant, intron_variant&non_coding_transcript_variant, downstream_gene_variant
rs12445517	16	1843331	A	G	0.40263	-0.0315069	0.00486339	41.9693	10.0328	9.27257e-11	-6.47838	IGF1	IGFALS, NUBP2, HAGH, SPSB3	intron_variant, downstream_gene_variant
rs12447016	16	80451142	T	C	0.482468	-0.0261622	0.00464748	31.6892	7.74251	1.80921e-08	-5.62933	GGT	RP11-525K10.3	intron_variant&non_coding_transcript_variant
rs142597930	16	1858403	A	G	0.0148172	-0.123558	0.0198186	38.8684	9.34357	4.53346e-10	-6.23445	IGF1	HAGH	downstream_gene_variant, intron_variant
rs146191451	16	80506286	C	T	0.0299695	0.075947	0.0136631	30.8976	7.56541	2.72013e-08	5.55855	GGT	RP11-525K10.3	intron_variant&non_coding_transcript_variant
rs148931404	16	56914455	G	A	0.0213823	0.107053	0.0159614	44.9843	10.702	1.98609e-11	6.70699	HDL	SLC12A3	intron_variant
rs148970147	16	56690085	A	T	0.0122943	-0.115141	0.0209773	30.1276	7.39305	4.04529e-08	-5.48884	APOA	MT1B, MT1F, RP11-249C24.11	downstream_gene_variant, upstream_gene_variant
rs148970147	16	56690085	A	T	0.0122943	-0.1343	0.0208341	41.5531	9.94038	1.14715e-10	-6.44616	HDL	MT1B, MT1F, RP11-249C24.11	downstream_gene_variant, upstream_gene_variant
rs149754235	16	56876875	A	G	0.0263591	0.0855111	0.0143913	35.3057	8.55006	2.81799e-09	5.94186	APOA	NUP93	intron_variant, downstream_gene_variant, intron_variant&non_coding_transcript_variant
rs149754235	16	56876875	A	G	0.0263591	0.102885	0.0142931	51.8152	12.2148	6.09818e-13	7.19823	HDL	NUP93	intron_variant, downstream_gene_variant, intron_variant&non_coding_transcript_variant
rs150911013	16	56418284	T	C	0.0110171	-0.140151	0.0220026	40.5735	9.72271	1.89361e-10	-6.36975	HDL	AMFR	intron_variant, intron_variant&non_coding_transcript_variant, downstream_gene_variant
rs1566439	16	57024662	T	C	0.403148	0.0288029	0.00466668	38.0941	9.17125	6.7414e-10	6.17203	HDL	NLRC5	intron_variant, non_coding_transcript_exon_variant, intron_variant&non_coding_transcript_variant, intron_variant&NMD_transcript_variant
rs158482	16	57076115	G	T	0.0167162	-0.125239	0.0179468	48.6971	11.5248	2.98676e-12	-6.97835	APOA	NLRC5	intron_variant, upstream_gene_variant, intron_variant&NMD_transcript_variant, intron_variant&non_coding_transcript_variant
rs158482	16	57076115	G	T	0.0167162	-0.148434	0.0178243	69.349	16.0836	8.24898e-17	-8.32762	HDL	NLRC5	intron_variant, upstream_gene_variant, intron_variant&NMD_transcript_variant, intron_variant&non_coding_transcript_variant
rs16965150	16	57059484	C	T	0.0274511	0.0789325	0.0140257	31.6711	7.73845	1.82621e-08	5.6277	HDL	NLRC5	missense_variant, upstream_gene_variant, downstream_gene_variant, missense_variant&NMD_transcript_variant
rs17616063	16	51436882	A	G	0.0762908	-0.116068	0.00925138	157.404	35.3791	4.17734e-36	-12.546	CRP	.	intergenic_variant
rs17616063	16	51436882	A	G	0.0762908	0.0481157	0.00875802	30.183	7.40545	3.93143e-08	5.4939	GGT	.	intergenic_variant
rs1834036	16	71972060	G	A	0.469009	0.0299373	0.0049607	36.4201	8.79845	1.59056e-09	6.03489	LDL	PKD1L3	intron_variant&non_coding_transcript_variant
rs1834036	16	71972060	G	A	0.469009	0.0292587	0.00488469	35.8785	8.67775	2.10015e-09	5.98988	APOB	PKD1L3	intron_variant&non_coding_transcript_variant
rs1834036	16	71972060	G	A	0.469009	0.0293192	0.00497	34.8009	8.43747	3.65199e-09	5.89924	CHO	PKD1L3	intron_variant&non_coding_transcript_variant
rs1875236	16	57033696	G	A	0.102806	0.0724446	0.00758235	91.2859	20.9054	1.24337e-21	9.55437	APOA	NLRC5	intron_variant, upstream_gene_variant, intron_variant&non_coding_transcript_variant, intron_variant&NMD_transcript_variant
rs1875236	16	57033696	G	A	0.102806	0.0855376	0.00753059	129.02	29.173	6.71429e-30	11.3587	HDL	NLRC5	intron_variant, upstream_gene_variant, intron_variant&non_coding_transcript_variant, intron_variant&NMD_transcript_variant
rs2052285	16	51188432	A	G	0.38985	0.0360183	0.00502583	51.3606	12.1143	7.68599e-13	7.16664	CRP	SALL1, AC009166.5	upstream_gene_variant, downstream_gene_variant
rs34136389	16	56909322	A	G	0.269005	-0.0331426	0.00518286	40.8917	9.79343	1.60905e-10	-6.39465	APOA	SLC12A3	intron_variant
rs34136389	16	56909322	A	G	0.269005	-0.0364202	0.00514748	50.0607	11.8266	1.49073e-12	-7.07535	HDL	SLC12A3	intron_variant
rs34955778	16	15139594	T	C	0.418367	0.0284652	0.00490408	33.691	8.18977	6.45996e-09	5.80439	TRIG	NTAN1, PDXDC1	intron_variant, intron_variant&NMD_transcript_variant, non_coding_transcript_exon_variant, downstream_gene_variant
rs377719564	16	56932165	G	T	0.0126383	0.127929	0.0205891	38.6068	9.28535	5.18382e-10	6.21343	HDL	SLC12A3	intron_variant, upstream_gene_variant
rs41278174	16	16259596	G	A	0.0272138	0.120089	0.0150812	63.4062	14.7742	1.6819e-15	7.96283	PHOS	ABCC6	missense_variant, 3_prime_UTR_variant&NMD_transcript_variant
rs4783961	16	56994894	A	G	0.490248	-0.0681764	0.00461438	218.294	48.6714	2.13108e-49	-14.7748	APOA	CETP, AC012181.1	upstream_gene_variant, downstream_gene_variant
rs4783961	16	56994894	A	G	0.490248	0.0273053	0.00485902	31.579	7.71785	1.91492e-08	5.61951	APOB	CETP, AC012181.1	upstream_gene_variant, downstream_gene_variant
rs4783961	16	56994894	A	G	0.490248	-0.087887	0.00458288	367.766	81.2414	5.73588e-82	-19.1772	HDL	CETP, AC012181.1	upstream_gene_variant, downstream_gene_variant
rs4843766	16	88015663	T	C	0.498708	0.0257187	0.0045638	31.7574	7.75775	1.74683e-08	5.63537	SHBG	BANP	intron_variant, downstream_gene_variant, intron_variant&NMD_transcript_variant, upstream_gene_variant, intron_variant&non_coding_transcript_variant
rs4888087	16	80490858	T	G	0.499179	0.026439	0.00463623	32.5208	7.9284	1.17923e-08	5.70269	GGT	RP11-525K10.3	intron_variant&non_coding_transcript_variant
rs5880	16	57015091	G	C	0.0555262	-0.200491	0.0100596	397.213	87.6523	2.2269e-88	-19.9303	APOA	CETP	missense_variant
rs5880	16	57015091	G	C	0.0555262	0.073337	0.010593	47.9304	11.3549	4.41672e-12	6.92316	APOB	CETP	missense_variant
rs5880	16	57015091	G	C	0.0555262	-0.255156	0.00999098	652.221	143.134	7.34514e-144	-25.5386	HDL	CETP	missense_variant
rs5882	16	57016092	A	G	0.314176	0.0812334	0.00494803	269.529	59.8424	1.43747e-60	16.4173	APOA	CETP	missense_variant
rs5882	16	57016092	A	G	0.314176	0.103145	0.00491425	440.533	97.0816	8.28705e-98	20.989	HDL	CETP	missense_variant
rs7200805	16	56989015	C	T	0.0277371	-0.0774776	0.0140973	30.205	7.41039	3.88696e-08	-5.49592	APOA	AC012181.1	upstream_gene_variant
rs7200805	16	56989015	C	T	0.0277371	-0.100529	0.0140011	51.554	12.1571	6.96466e-13	-7.18008	HDL	AC012181.1	upstream_gene_variant
rs7205421	16	56879571	C	G	0.474507	0.031948	0.00459999	48.2361	11.4227	3.77833e-12	6.94523	HDL	NUP93	downstream_gene_variant
rs75281121	16	56747976	G	C	0.0279923	-0.0786837	0.0140061	31.5597	7.71354	1.93402e-08	-5.61782	APOA	RP11-343H19.1	intron_variant&non_coding_transcript_variant
rs75281121	16	56747976	G	C	0.0279923	-0.100087	0.0139105	51.7691	12.2046	6.2431e-13	-7.19507	HDL	RP11-343H19.1	intron_variant&non_coding_transcript_variant
rs79968526	16	56911069	T	C	0.0216838	-0.0932753	0.0157467	35.0879	8.50147	3.15159e-09	-5.92348	HDL	SLC12A3	intron_variant
rs80082308	16	56796904	A	G	0.0288784	0.0777499	0.0138288	31.6106	7.72492	1.884e-08	5.62232	APOA	NUP93	intron_variant
rs80082308	16	56796904	A	G	0.0288784	0.0980786	0.0137344	50.9954	12.0335	9.25763e-13	7.14109	HDL	NUP93	intron_variant
rs837763	16	88853729	T	C	0.446583	-0.0444398	0.00476643	86.9276	19.9486	1.12564e-20	-9.3235	HBA1C	PIEZO1	upstream_gene_variant
rs9924087	16	57002242	C	T	0.0718294	0.0633054	0.00889109	50.6957	11.9672	1.07845e-12	7.12009	HDL	CETP	intron_variant, intron_variant&non_coding_transcript_variant
rs9941279	16	79738834	A	C	0.486651	0.0337994	0.00472219	51.2308	12.0855	8.21297e-13	7.15757	ALP	RP11-345M22.1	intron_variant&non_coding_transcript_variant
rs11078698	17	7479892	C	T	0.0170009	-0.242472	0.017931	182.857	40.9384	1.15239e-41	-13.5225	SHBG	CD68, EIF4A1, SENP3, SNORA67, SNORA48, SNORD10, SENP3-EIF4A1	upstream_gene_variant, synonymous_variant, downstream_gene_variant, intron_variant&non_coding_transcript_variant, non_coding_transcript_exon_variant, 3_prime_UTR_variant&NMD_transcript_variant, intron_variant, missense_variant&NMD_transcript_variant
rs112043381	17	80697523	C	T	0.488054	0.0531573	0.00475553	124.948	28.2819	5.22516e-29	11.178	HBA1C	FN3K	intron_variant, intron_variant&non_coding_transcript_variant, downstream_gene_variant
rs1136201	17	37879588	A	G	0.249549	0.0292623	0.00469952	38.7713	9.32194	4.76497e-10	6.22666	CREA	ERBB2, MIR4728	missense_variant, 3_prime_UTR_variant&NMD_transcript_variant, non_coding_transcript_exon_variant, upstream_gene_variant, downstream_gene_variant
rs11650232	17	7088923	A	G	0.447166	-0.0305373	0.0047303	41.6759	9.96767	1.07728e-10	-6.45568	ALP	DLG4	downstream_gene_variant
rs11650232	17	7088923	A	G	0.447166	-0.0270984	0.00464912	33.9739	8.25293	5.5856e-09	-5.82872	SHBG	DLG4	downstream_gene_variant
rs11870336	17	80928947	C	T	0.435265	-0.0421468	0.00477771	77.8196	17.9473	1.12902e-18	-8.82155	HBA1C	B3GNTL1	intron_variant, intron_variant&non_coding_transcript_variant, intron_variant&NMD_transcript_variant
rs12449814	17	7911709	G	T	0.0343337	-0.172391	0.0127192	183.698	41.122	7.55092e-42	-13.5536	SHBG	GUCY2D	intron_variant
rs12937543	17	7458582	T	A	0.432441	-0.0635922	0.00468002	184.634	41.3263	4.71737e-42	-13.588	SHBG	TNFSF12, TNFSF12-TNFSF13, TNFSF13	intron_variant, intron_variant&NMD_transcript_variant, upstream_gene_variant, intron_variant&non_coding_transcript_variant
rs12937634	17	47444442	T	C	0.462261	-0.0574173	0.00465969	151.835	34.1621	6.88494e-35	-12.3221	SHBG	ZNF652, RP11-1079K10.3, RP11-81K2.1	upstream_gene_variant, downstream_gene_variant, intron_variant&non_coding_transcript_variant
rs12938947	17	7599665	G	A	0.0744129	-0.131571	0.0088171	222.673	49.6266	2.36265e-50	-14.9223	SHBG	WRAP53	intron_variant, intron_variant&non_coding_transcript_variant, intron_variant&NMD_transcript_variant
rs12940987	17	59269257	A	G	0.216287	-0.0359577	0.00493509	53.0877	12.4962	3.19007e-13	-7.28613	CREA	BCAS3	intron_variant, intron_variant&non_coding_transcript_variant
rs12940987	17	59269257	A	G	0.216287	-0.037921	0.00595012	40.6171	9.7324	1.85183e-10	-6.37315	PHOS	BCAS3	intron_variant, intron_variant&non_coding_transcript_variant
rs12951306	17	7020507	T	C	0.474045	-0.027356	0.00472633	33.5008	8.14732	7.12328e-09	-5.788	ALP	ASGR2	upstream_gene_variant
rs12951345	17	36077863	A	C	0.227073	0.0343955	0.00556762	38.165	9.18702	6.501e-10	6.17777	GGT	HNF1B	intron_variant
rs138786406	17	61357294	G	C	0.0207288	0.0950653	0.0168084	31.9884	7.80941	1.55092e-08	5.65582	IGF1	TANC2, AC037445.1	intron_variant, intron_variant&non_coding_transcript_variant
rs142039417	17	61988614	A	T	0.0223498	0.117684	0.0162621	52.3702	12.3376	4.59621e-13	7.2367	IGF1	CSHL1	5_prime_UTR_variant, upstream_gene_variant, intron_variant, non_coding_transcript_exon_variant
rs147438979	17	42061277	G	C	0.00914059	-0.143464	0.0241707	35.2295	8.53305	2.93056e-09	-5.93545	APOA	PYY	intron_variant
rs147438979	17	42061277	G	C	0.00914059	-0.156798	0.0238951	43.0588	10.2748	5.31129e-11	-6.56193	HDL	PYY	intron_variant
rs147438979	17	42061277	G	C	0.00914059	0.141649	0.0254825	30.8989	7.56571	2.71825e-08	5.55868	TRIG	PYY	intron_variant
rs1477141	17	53361838	T	G	0.4917	0.0248684	0.0041634	35.6779	8.63304	2.32788e-09	5.9731	URT	HLF	intron_variant, intron_variant&NMD_transcript_variant, intron_variant&non_coding_transcript_variant
rs1554948	17	7286326	T	A	0.484389	0.0306239	0.00464894	43.3922	10.3488	4.4792e-11	6.58729	SHBG	TNK1	synonymous_variant, non_coding_transcript_exon_variant, upstream_gene_variant, synonymous_variant&NMD_transcript_variant
rs17881850	17	7573057	G	A	0.00959615	0.184668	0.0238401	60.0021	14.0234	9.47545e-15	7.74611	SHBG	TP53	intron_variant, intron_variant&non_coding_transcript_variant, downstream_gene_variant
rs1801689	17	64210580	A	C	0.0289227	0.0879133	0.0146965	35.7834	8.65655	2.20521e-09	5.98192	LDL	APOH	missense_variant, downstream_gene_variant, intron_variant
rs1801689	17	64210580	A	C	0.0289227	0.0931875	0.0144665	41.4943	9.92732	1.18217e-10	6.44161	APOB	APOH	missense_variant, downstream_gene_variant, intron_variant
rs1801689	17	64210580	A	C	0.0289227	0.0856076	0.0142387	36.1479	8.7378	1.82894e-09	6.01232	IGF1	APOH	missense_variant, downstream_gene_variant, intron_variant
rs1801689	17	64210580	A	C	0.0289227	-0.090518	0.0138164	42.922	10.2444	5.69639e-11	-6.55149	SHBG	APOH	missense_variant, downstream_gene_variant, intron_variant
rs191963994	17	7555668	G	A	0.00864747	0.167376	0.0250919	44.4956	10.5936	2.54918e-11	6.67052	SHBG	ATP1B2	intron_variant, upstream_gene_variant
rs2053595	17	7029549	G	A	0.342371	-0.0340806	0.00496698	47.0792	11.1664	6.81711e-12	-6.86143	ALP	.	intergenic_variant
rs2073284	17	76117401	G	A	0.435929	-0.0405351	0.00479267	71.5331	16.5644	2.72647e-17	-8.45773	HBA1C	TMC6	intron_variant, downstream_gene_variant, intron_variant&non_coding_transcript_variant, upstream_gene_variant
rs2199111	17	80823203	C	T	0.497824	0.0277601	0.00476374	33.9584	8.24946	5.63041e-09	5.82738	HBA1C	TBCD	intron_variant, intron_variant&non_coding_transcript_variant
rs222837	17	7132556	C	T	0.497382	0.0281256	0.00468742	36.0026	8.70542	1.97052e-09	6.00023	ALP	DVL2, ACADVL	synonymous_variant, downstream_gene_variant, upstream_gene_variant, non_coding_transcript_exon_variant
rs2252281	17	19437187	T	C	0.389196	0.0249803	0.00417187	35.8537	8.67223	2.12701e-09	5.98779	CREA	SLC47A1	5_prime_UTR_variant, upstream_gene_variant, intron_variant, non_coding_transcript_exon_variant, intron_variant&non_coding_transcript_variant
rs2376583	17	76402105	A	T	0.498345	0.0273471	0.00459996	35.3439	8.55858	2.76325e-09	5.94507	APOA	PGS1	intron_variant, intron_variant&non_coding_transcript_variant, intron_variant&NMD_transcript_variant, downstream_gene_variant
rs2376583	17	76402105	A	T	0.498345	0.0278705	0.00454751	37.5615	9.05269	8.85748e-10	6.12874	HDL	PGS1	intron_variant, intron_variant&non_coding_transcript_variant, intron_variant&NMD_transcript_variant, downstream_gene_variant
rs2460468	17	80774265	A	G	0.481453	0.0444885	0.00476649	87.1163	19.99	1.02329e-20	9.3336	HBA1C	TBCD	intron_variant
rs2546494	17	46959525	A	G	0.481593	0.0270213	0.00455419	35.204	8.52736	2.9692e-09	5.93328	HDL	SNORA68, RP11-463M16.5, SUMO2P17	downstream_gene_variant, intron_variant&non_coding_transcript_variant
rs2546494	17	46959525	A	G	0.481593	0.0276948	0.00466143	35.2986	8.54847	2.82833e-09	5.94127	SHBG	SNORA68, RP11-463M16.5, SUMO2P17	downstream_gene_variant, intron_variant&non_coding_transcript_variant
rs2584652	17	47514665	A	C	0.129667	0.0640708	0.00687735	86.7915	19.9187	1.20587e-20	9.3162	SHBG	RP11-81K2.1	intron_variant
rs28465123	17	65579733	A	C	0.334649	-0.0317414	0.00516506	37.766	9.09822	7.97591e-10	-6.14541	URA	PITPNC1	intron_variant, intron_variant&non_coding_transcript_variant
rs28510139	17	7956023	C	T	0.0667664	0.0531118	0.00932672	32.4283	7.90772	1.23674e-08	5.69459	SHBG	ALOX15B, RP11-599B13.3	downstream_gene_variant
rs314246	17	7040457	C	A	0.169766	0.0374465	0.00630109	35.3177	8.55272	2.80079e-09	5.94286	ALP	RPL7AP64	upstream_gene_variant
rs314252	17	7092506	G	A	0.248111	0.0420267	0.00547944	58.8272	13.7641	1.72147e-14	7.66989	ALP	DLG4	downstream_gene_variant
rs3785517	17	80894878	G	A	0.427538	0.048909	0.00480877	103.445	23.5723	2.67732e-24	10.1708	HBA1C	TBCD	intron_variant, upstream_gene_variant, intron_variant&non_coding_transcript_variant
rs3794738	17	76119293	C	T	0.0784338	-0.0489639	0.00880057	30.955	7.57826	2.64083e-08	-5.56372	HBA1C	TMC6	intron_variant, intron_variant&non_coding_transcript_variant, downstream_gene_variant, upstream_gene_variant
rs3813027	17	76123463	C	G	0.0702791	0.0650189	0.00926786	49.2176	11.64	2.29087e-12	7.01552	HBA1C	TMC6, TMC8	intron_variant, upstream_gene_variant, intron_variant&NMD_transcript_variant, intron_variant&non_coding_transcript_variant, downstream_gene_variant
rs4130668	17	7739664	C	T	0.218776	-0.0489189	0.00562482	75.6373	17.4674	3.40879e-18	-8.69697	SHBG	KDM6B, DNAH2	upstream_gene_variant, downstream_gene_variant
rs4151134	17	7347123	T	C	0.411597	-0.141908	0.0047256	901.785	197.396	4.01791e-198	-30.0296	SHBG	FGF11, CHRNB1, RP11-104H15.7, RP11-104H15.10, RP11-104H15.8	3_prime_UTR_variant, upstream_gene_variant, downstream_gene_variant, non_coding_transcript_exon_variant
rs4439799	17	45781599	C	T	0.496408	-0.0324	0.00463982	48.7626	11.5393	2.88868e-12	-6.98303	SHBG	TBKBP1	intron_variant
rs4558460	17	7051469	C	T	0.470446	0.0267397	0.00472026	32.0908	7.8323	1.4713e-08	5.66488	ALP	.	intergenic_variant
rs4796412	17	7280269	G	A	0.100318	-0.0740544	0.00773702	91.6125	20.9771	1.05414e-21	-9.57144	SHBG	TNK1	upstream_gene_variant
rs56217607	17	7692656	C	T	0.108523	0.0508301	0.00745538	46.4839	11.0344	9.23847e-12	6.81791	SHBG	DNAH2	intron_variant, downstream_gene_variant
rs56360822	17	7264027	G	A	0.163052	-0.0494453	0.00627184	62.1527	14.4978	3.17834e-15	-7.8837	SHBG	TMEM95	downstream_gene_variant
rs59574779	17	80925401	G	A	0.416855	-0.0266092	0.00481188	30.5796	7.49426	3.20435e-08	-5.5299	HBA1C	B3GNTL1	intron_variant, intron_variant&non_coding_transcript_variant, intron_variant&NMD_transcript_variant
rs62076145	17	80926946	A	G	0.488752	-0.0314578	0.00476198	43.6396	10.4037	3.9473e-11	-6.60603	HBA1C	B3GNTL1	intron_variant, intron_variant&non_coding_transcript_variant, intron_variant&NMD_transcript_variant
rs62623385	17	7847837	A	T	0.0336426	-0.18044	0.0128407	197.464	44.1266	7.47137e-45	-14.0522	SHBG	CNTROB	intron_variant, missense_variant, downstream_gene_variant, intron_variant&NMD_transcript_variant, upstream_gene_variant, non_coding_transcript_exon_variant
rs7206971	17	45425115	G	A	0.489436	-0.0332664	0.00463832	51.4387	12.1316	7.38584e-13	-7.17208	SHBG	EFCAB13, ITGB3	intron_variant, downstream_gene_variant, intron_variant&non_coding_transcript_variant
rs72836561	17	41926126	C	T	0.0324151	-0.128946	0.0129395	99.3067	22.665	2.16272e-23	-9.9653	APOA	CD300LG	missense_variant
rs72836561	17	41926126	C	T	0.0324151	-0.159503	0.012792	155.476	34.9578	1.10205e-35	-12.469	HDL	CD300LG	missense_variant
rs72836561	17	41926126	C	T	0.0324151	0.131729	0.0136418	93.2439	21.3351	4.62275e-22	9.65628	TRIG	CD300LG	missense_variant
rs72841437	17	7812747	C	T	0.0170924	0.110503	0.0179643	37.8382	9.11428	7.68635e-10	6.15126	SHBG	AC025335.1, CHD3, SCARNA21	downstream_gene_variant, intron_variant, intron_variant&NMD_transcript_variant, upstream_gene_variant
rs7502910	17	1638718	G	A	0.499211	-0.032353	0.00497131	42.3534	10.1181	7.61904e-11	-6.50794	ALB	WDR81, RP11-961A15.1	intron_variant, downstream_gene_variant, intron_variant&non_coding_transcript_variant
rs7502910	17	1638718	G	A	0.499211	-0.0275572	0.00503181	29.9932	7.36294	4.33571e-08	-5.4766	CAL	WDR81, RP11-961A15.1	intron_variant, downstream_gene_variant, intron_variant&non_coding_transcript_variant
rs75839667	17	7648671	G	A	0.0470562	-0.086848	0.0109004	63.4795	14.7904	1.62032e-15	-7.96741	SHBG	DNAH2	downstream_gene_variant, intron_variant
rs76138007	17	7880565	C	A	0.0788813	0.0516425	0.00859782	36.0777	8.72214	1.89609e-09	6.00646	SHBG	.	intergenic_variant
rs76708468	17	62206299	T	C	0.0391694	0.0895269	0.0123147	52.852	12.4441	3.59667e-13	7.26992	IGF1	ERN1	intron_variant, intron_variant&non_coding_transcript_variant, 3_prime_UTR_variant
rs76868109	17	41776943	A	C	0.0345852	-0.0921579	0.0125304	54.0925	12.7184	1.91249e-13	-7.35475	APOA	CTC-501O10.1	intron_variant&non_coding_transcript_variant
rs76868109	17	41776943	A	C	0.0345852	-0.119951	0.0123875	93.7651	21.4494	3.55304e-22	-9.68323	HDL	CTC-501O10.1	intron_variant&non_coding_transcript_variant
rs76868109	17	41776943	A	C	0.0345852	0.105297	0.0132104	63.5329	14.8021	1.57725e-15	7.97077	TRIG	CTC-501O10.1	intron_variant&non_coding_transcript_variant
rs77454872	17	45509496	G	A	0.483504	-0.0351493	0.00464696	57.2133	13.4078	3.91021e-14	-7.56393	SHBG	EFCAB13	intron_variant, downstream_gene_variant
rs78357146	17	64305051	A	G	0.0287871	0.0821259	0.0147308	31.0818	7.60663	2.47383e-08	5.57511	LDL	PRKCA	intron_variant&NMD_transcript_variant, intron_variant, intron_variant&non_coding_transcript_variant, downstream_gene_variant
rs78357146	17	64305051	A	G	0.0287871	0.0868074	0.0145003	35.8393	8.66902	2.14279e-09	5.98659	APOB	PRKCA	intron_variant&NMD_transcript_variant, intron_variant, intron_variant&non_coding_transcript_variant, downstream_gene_variant
rs78357146	17	64305051	A	G	0.0287871	0.0806457	0.014272	31.9296	7.79625	1.59864e-08	5.65062	IGF1	PRKCA	intron_variant&NMD_transcript_variant, intron_variant, intron_variant&non_coding_transcript_variant, downstream_gene_variant
rs78357146	17	64305051	A	G	0.0287871	-0.0886981	0.0138487	41.0216	9.8223	1.50557e-10	-6.4048	SHBG	PRKCA	intron_variant&NMD_transcript_variant, intron_variant, intron_variant&non_coding_transcript_variant, downstream_gene_variant
rs8080690	17	7409499	T	G	0.401613	-0.0964584	0.00473925	414.248	91.3606	4.35913e-92	-20.3531	SHBG	POLR2A	intron_variant, upstream_gene_variant, downstream_gene_variant
rs858519	17	7531965	C	T	0.442735	-0.19396	0.00468236	1715.91	374.32	0	-41.4236	SHBG	SAT2, SHBG	upstream_gene_variant, intron_variant
rs898103	17	80845827	G	C	0.412269	0.0549175	0.00484039	128.724	29.1083	7.79292e-30	11.3457	HBA1C	TBCD	intron_variant, intron_variant&non_coding_transcript_variant
rs9797203	17	16851054	G	A	0.145589	-0.0387258	0.00703824	30.2743	7.4259	3.75059e-08	-5.5022	ALB	TNFRSF13B	intron_variant, intron_variant&non_coding_transcript_variant, intron_variant&NMD_transcript_variant
rs9797203	17	16851054	G	A	0.145589	0.054209	0.00713881	57.6623	13.507	3.11172e-14	7.59356	TPROT	TNFRSF13B	intron_variant, intron_variant&non_coding_transcript_variant, intron_variant&NMD_transcript_variant
rs9893249	17	7570189	T	C	0.393852	0.0506513	0.00475731	113.36	25.7447	1.80011e-26	10.647	SHBG	TP53	downstream_gene_variant, intron_variant
rs9905140	17	59496238	C	T	0.386249	0.0296735	0.00417522	50.5101	11.9261	1.1855e-12	7.10705	CREA	.	intergenic_variant
rs12958839	18	47145202	A	G	0.468614	-0.0318395	0.00460182	47.871	11.3418	4.55198e-12	-6.91889	APOA	.	intergenic_variant
rs12958839	18	47145202	A	G	0.468614	-0.0299789	0.00454483	43.5106	10.375	4.21697e-11	-6.59626	HDL	.	intergenic_variant
rs138571974	18	47335627	C	T	0.0559718	0.0553478	0.0099806	30.753	7.53306	2.93049e-08	5.54554	APOA	ACAA2, SCARNA17, RP11-886H22.1	intron_variant, upstream_gene_variant, intron_variant&NMD_transcript_variant
rs138571974	18	47335627	C	T	0.0559718	0.0586121	0.009857	35.3578	8.56167	2.74366e-09	5.94624	HDL	ACAA2, SCARNA17, RP11-886H22.1	intron_variant, upstream_gene_variant, intron_variant&NMD_transcript_variant
rs1484873	18	43206985	G	A	0.053173	-0.0751122	0.0108334	48.0717	11.3862	4.1096e-12	-6.93339	URA	SLC14A2	missense_variant, missense_variant&NMD_transcript_variant
rs17656498	18	47128176	T	C	0.34745	0.0349808	0.00482291	52.6067	12.3899	4.07474e-13	7.25305	APOA	.	intergenic_variant
rs17656498	18	47128176	T	C	0.34745	0.0304377	0.00476318	40.8346	9.78075	1.65672e-10	6.39021	HDL	.	intergenic_variant
rs3744867	18	56149048	A	G	0.432866	0.0303654	0.00486994	38.8785	9.3458	4.51024e-10	6.23527	ALT	ALPK2	3_prime_UTR_variant
rs3744867	18	56149048	A	G	0.432866	0.0357874	0.00468929	58.2433	13.6352	2.31633e-14	7.63173	GGT	ALPK2	3_prime_UTR_variant
rs3897644	18	57729069	T	C	0.44506	0.0287596	0.00509406	31.8741	7.78384	1.64498e-08	5.64571	BMI	.	intergenic_variant
rs41301139	18	43262408	G	A	0.0167772	0.138452	0.0189696	53.27	12.5365	2.90737e-13	7.29863	URA	SLC14A2, RP11-116O18.3	missense_variant, intron_variant&non_coding_transcript_variant
rs7228877	18	47479087	C	A	0.442203	-0.0284778	0.00461081	38.1469	9.183	6.56145e-10	-6.17631	APOA	MYO5B	intron_variant
rs7505828	18	47246485	T	C	0.433726	0.0485461	0.00464018	109.456	24.8895	1.28973e-25	10.4621	APOA	.	intergenic_variant
rs7505828	18	47246485	T	C	0.433726	0.0409863	0.00458272	79.9893	18.4243	3.76444e-19	8.94366	HDL	.	intergenic_variant
rs78626055	18	47566647	A	G	0.0291058	-0.0742651	0.0135032	30.2479	7.41998	3.80207e-08	-5.49981	HDL	MYO5B	missense_variant, non_coding_transcript_exon_variant
rs79204427	18	47693130	T	C	0.012315	0.123826	0.0207909	35.4715	8.58702	2.58809e-09	5.95578	APOA	MYO5B	intron_variant
rs79204427	18	47693130	T	C	0.012315	0.117801	0.0205334	32.9135	8.01615	9.63496e-09	5.73704	HDL	MYO5B	intron_variant
rs8091180	18	77164243	A	G	0.434132	-0.0277041	0.00409626	45.7418	10.8699	1.34927e-11	-6.76327	CREA	NFATC1	intron_variant, intron_variant&NMD_transcript_variant
rs9675910	18	47480985	G	A	0.110599	0.0457201	0.00733923	38.8073	9.32997	4.67767e-10	6.22955	APOA	MYO5B	intron_variant
rs9675910	18	47480985	G	A	0.110599	0.0419359	0.00724834	33.4729	8.14109	7.2262e-09	5.78559	HDL	MYO5B	intron_variant
rs1035478	19	33316323	C	T	0.496976	-0.0223984	0.00406027	30.4317	7.46114	3.45828e-08	-5.51648	CREA	TDRD12, CTD-2085J24.5	downstream_gene_variant, intron_variant&NMD_transcript_variant, upstream_gene_variant
rs10412048	19	11193949	A	G	0.12492	-0.178797	0.00759371	554.388	121.855	1.39637e-122	-23.5454	LDL	.	intergenic_variant
rs10412048	19	11193949	A	G	0.12492	-0.168146	0.00754469	496.695	109.303	4.97737e-110	-22.2867	APOB	.	intergenic_variant
rs10412048	19	11193949	A	G	0.12492	-0.158323	0.00756626	437.85	96.4977	3.17907e-97	-20.9249	CHO	.	intergenic_variant
rs10413792	19	50115031	A	T	0.340302	-0.0401021	0.00525519	58.2314	13.6326	2.33024e-14	-7.63095	ALB	PRR12	intron_variant
rs10413792	19	50115031	A	T	0.340302	-0.0394645	0.00533357	54.7491	12.8635	1.3693e-13	-7.39927	TPROT	PRR12	intron_variant
rs10417565	19	33967632	T	C	0.486968	-0.0258005	0.00468408	30.3396	7.44051	3.62652e-08	-5.50813	GGT	PEPD	intron_variant, intron_variant&non_coding_transcript_variant, intron_variant&NMD_transcript_variant
rs10419669	19	45298069	G	A	0.0676242	0.0575178	0.00992806	33.5642	8.16146	6.89509e-09	5.79346	APOB	CBLC	intron_variant
rs10422256	19	11216617	A	G	0.479518	-0.0379884	0.00501971	57.2722	13.4208	3.7949e-14	-7.56785	LDL	LDLR	intron_variant, downstream_gene_variant, upstream_gene_variant
rs10422256	19	11216617	A	G	0.479518	-0.0381531	0.00498731	58.5231	13.697	2.00909e-14	-7.65004	APOB	LDLR	intron_variant, downstream_gene_variant, upstream_gene_variant
rs10422256	19	11216617	A	G	0.479518	-0.0326211	0.00500156	42.5387	10.1593	6.92947e-11	-6.52219	CHO	LDLR	intron_variant, downstream_gene_variant, upstream_gene_variant
rs10445598	19	33832285	G	C	0.499363	0.0277624	0.00463334	35.9026	8.68313	2.07429e-09	5.99188	GGT	RPS3AP50	non_coding_transcript_exon_variant
rs10469364	19	11274679	G	A	0.464001	-0.0507697	0.00503768	101.566	23.1604	6.91194e-24	-10.078	LDL	KANK2	downstream_gene_variant
rs10469364	19	11274679	G	A	0.464001	-0.0486195	0.00500516	94.3593	21.5798	2.63148e-22	-9.71388	APOB	KANK2	downstream_gene_variant
rs10469364	19	11274679	G	A	0.464001	-0.0424989	0.00501947	71.6868	16.5982	2.52232e-17	-8.46681	CHO	KANK2	downstream_gene_variant
rs111794050	19	45302778	A	G	0.0364601	-0.244723	0.0134455	331.279	73.2958	5.06058e-74	-18.2011	LDL	CBLC	intron_variant
rs111794050	19	45302778	A	G	0.0364601	-0.317725	0.0133587	565.684	124.312	4.87528e-125	-23.7841	APOB	CBLC	intron_variant
rs111794050	19	45302778	A	G	0.0364601	-0.19644	0.0133969	215.005	47.9541	1.11148e-48	-14.6631	CHO	CBLC	intron_variant
rs112027066	19	45129089	C	T	0.0170992	-0.133435	0.0193143	47.7288	11.3103	4.89441e-12	-6.90861	LDL	IGSF23, CEACAM22P	intron_variant, upstream_gene_variant, downstream_gene_variant
rs112027066	19	45129089	C	T	0.0170992	-0.187057	0.0191896	95.0205	21.7249	1.88408e-22	-9.74783	APOB	IGSF23, CEACAM22P	intron_variant, upstream_gene_variant, downstream_gene_variant
rs113345881	19	45431636	A	G	0.104018	-0.149605	0.00825174	328.703	72.7348	1.84162e-73	-18.1301	LDL	APOC1P1	intron_variant&non_coding_transcript_variant
rs113345881	19	45431636	A	G	0.104018	-0.211232	0.00819847	663.827	145.658	2.19786e-146	-25.7648	APOB	APOC1P1	intron_variant&non_coding_transcript_variant
rs113345881	19	45431636	A	G	0.104018	-0.103543	0.00822191	158.597	35.6398	2.29192e-36	-12.5935	CHO	APOC1P1	intron_variant&non_coding_transcript_variant
rs113345881	19	45431636	A	G	0.104018	0.0865676	0.00795902	118.302	26.8271	1.48902e-27	10.8767	TRIG	APOC1P1	intron_variant&non_coding_transcript_variant
rs11669173	19	45492559	A	G	0.492762	-0.0310833	0.00503841	38.0598	9.16362	6.86088e-10	-6.16927	LDL	CLPTM1	intron_variant, upstream_gene_variant, downstream_gene_variant, intron_variant&non_coding_transcript_variant, intron_variant&NMD_transcript_variant
rs11669173	19	45492559	A	G	0.492762	0.027658	0.00460282	36.1072	8.72873	1.86754e-09	6.00892	APOA	CLPTM1	intron_variant, upstream_gene_variant, downstream_gene_variant, intron_variant&non_coding_transcript_variant, intron_variant&NMD_transcript_variant
rs11669173	19	45492559	A	G	0.492762	-0.0484111	0.00500589	93.5249	21.3967	4.01144e-22	-9.67083	APOB	CLPTM1	intron_variant, upstream_gene_variant, downstream_gene_variant, intron_variant&non_coding_transcript_variant, intron_variant&NMD_transcript_variant
rs11669173	19	45492559	A	G	0.492762	0.0266112	0.00454618	34.2638	8.31763	4.81249e-09	5.85353	HDL	CLPTM1	intron_variant, upstream_gene_variant, downstream_gene_variant, intron_variant&non_coding_transcript_variant, intron_variant&NMD_transcript_variant
rs116843064	19	8429323	G	A	0.0187506	0.114057	0.0168716	45.7012	10.8609	1.37753e-11	6.7603	APOA	ANGPTL4	missense_variant, 5_prime_UTR_variant, missense_variant&NMD_transcript_variant, non_coding_transcript_exon_variant, intron_variant&non_coding_transcript_variant
rs116843064	19	8429323	G	A	0.0187506	0.186077	0.016664	124.689	28.2252	5.95388e-29	11.1664	HDL	ANGPTL4	missense_variant, 5_prime_UTR_variant, missense_variant&NMD_transcript_variant, non_coding_transcript_exon_variant, intron_variant&non_coding_transcript_variant
rs116843064	19	8429323	G	A	0.0187506	-0.217037	0.0178131	148.452	33.4227	3.77833e-34	-12.1841	TRIG	ANGPTL4	missense_variant, 5_prime_UTR_variant, missense_variant&NMD_transcript_variant, non_coding_transcript_exon_variant, intron_variant&non_coding_transcript_variant
rs116881820	19	45397952	T	C	0.0246699	0.168772	0.0162299	108.135	24.6002	2.51073e-25	10.3988	LDL	TOMM40, CTB-129P6.4	intron_variant, upstream_gene_variant, downstream_gene_variant, intron_variant&NMD_transcript_variant
rs116881820	19	45397952	T	C	0.0246699	0.213211	0.0161251	174.828	39.1852	6.5283e-40	13.2223	APOB	TOMM40, CTB-129P6.4	intron_variant, upstream_gene_variant, downstream_gene_variant, intron_variant&NMD_transcript_variant
rs116881820	19	45397952	T	C	0.0246699	0.152613	0.0161712	89.0631	20.4175	3.82384e-21	9.43733	CHO	TOMM40, CTB-129P6.4	intron_variant, upstream_gene_variant, downstream_gene_variant, intron_variant&NMD_transcript_variant
rs116881820	19	45397952	T	C	0.0246699	-0.224922	0.0159383	199.149	44.4945	3.20258e-45	-14.112	CRP	TOMM40, CTB-129P6.4	intron_variant, upstream_gene_variant, downstream_gene_variant, intron_variant&NMD_transcript_variant
rs117414940	19	19855549	A	C	0.0229212	-0.0941666	0.0167392	31.6462	7.73289	1.84974e-08	-5.62551	LDL	.	intergenic_variant
rs117414940	19	19855549	A	C	0.0229212	-0.0923284	0.0166312	30.8194	7.54792	2.83191e-08	-5.55152	APOB	.	intergenic_variant
rs117834294	19	10739265	C	T	0.0240604	-0.100783	0.0163686	37.9101	9.13031	7.40781e-10	-6.15709	LDL	SLC44A2	intron_variant, upstream_gene_variant, intron_variant&NMD_transcript_variant, intron_variant&non_coding_transcript_variant
rs117834294	19	10739265	C	T	0.0240604	-0.0912627	0.0162629	31.4913	7.69823	2.00341e-08	-5.61171	APOB	SLC44A2	intron_variant, upstream_gene_variant, intron_variant&NMD_transcript_variant, intron_variant&non_coding_transcript_variant
rs117834294	19	10739265	C	T	0.0240604	-0.0954321	0.0163094	34.2384	8.31195	4.87585e-09	-5.85136	CHO	SLC44A2	intron_variant, upstream_gene_variant, intron_variant&NMD_transcript_variant, intron_variant&non_coding_transcript_variant
rs12975366	19	54759361	T	C	0.394549	-0.0295896	0.00468704	39.8549	9.56296	2.73552e-10	-6.31307	APOA	LILRB5	missense_variant, non_coding_transcript_exon_variant
rs12975366	19	54759361	T	C	0.394549	-0.0305791	0.00494059	38.3081	9.21889	6.04102e-10	-6.18936	AST	LILRB5	missense_variant, non_coding_transcript_exon_variant
rs140011902	19	50026735	G	A	0.0103106	-0.202613	0.0246351	67.6435	15.708	1.95884e-16	-8.22457	ALB	FCGRT, RCN3	intron_variant, upstream_gene_variant, intron_variant&non_coding_transcript_variant, downstream_gene_variant, intron_variant&NMD_transcript_variant
rs140011902	19	50026735	G	A	0.0103106	-0.207056	0.0250025	68.5816	15.9146	1.21731e-16	-8.28141	TPROT	FCGRT, RCN3	intron_variant, upstream_gene_variant, intron_variant&non_coding_transcript_variant, downstream_gene_variant, intron_variant&NMD_transcript_variant
rs143777867	19	44978625	G	A	0.0135061	-0.172317	0.0216454	63.3761	14.7676	1.70765e-15	-7.96091	APOB	ZNF180, ZNF285B, AC069278.4	downstream_gene_variant
rs146390218	19	45478352	A	G	0.0261373	-0.23558	0.0157691	223.183	49.7379	1.82852e-50	-14.9393	LDL	CLPTM1	intron_variant, downstream_gene_variant, intron_variant&non_coding_transcript_variant
rs146390218	19	45478352	A	G	0.0261373	-0.325143	0.0156673	430.683	94.9378	1.15398e-95	-20.753	APOB	CLPTM1	intron_variant, downstream_gene_variant, intron_variant&non_coding_transcript_variant
rs146390218	19	45478352	A	G	0.0261373	-0.173925	0.0157121	122.533	27.7535	1.76401e-28	-11.0695	CHO	CLPTM1	intron_variant, downstream_gene_variant, intron_variant&non_coding_transcript_variant
rs150262789	19	46436564	C	T	0.0150096	-0.128693	0.0205707	39.1391	9.40377	3.94666e-10	-6.25613	APOB	NOVA2	downstream_gene_variant
rs1541596	19	10987013	G	A	0.476109	0.0293948	0.00501114	34.4085	8.34992	4.46766e-09	5.86589	LDL	CARM1	intron_variant, intron_variant&NMD_transcript_variant
rs1541596	19	10987013	G	A	0.476109	0.0284948	0.0049788	32.7553	7.98081	1.04518e-08	5.72323	APOB	CARM1	intron_variant, intron_variant&NMD_transcript_variant
rs167479	19	11526765	G	T	0.470996	-0.033053	0.00467774	49.9285	11.7974	1.59441e-12	-7.06602	SBP	CCDC151, RGL3	downstream_gene_variant, missense_variant, intron_variant&non_coding_transcript_variant, non_coding_transcript_exon_variant, missense_variant&NMD_transcript_variant, synonymous_variant&NMD_transcript_variant, upstream_gene_variant
rs167479	19	11526765	G	T	0.470996	-0.0366194	0.00493165	55.1365	12.9491	1.12435e-13	-7.42539	DBP	CCDC151, RGL3	downstream_gene_variant, missense_variant, intron_variant&non_coding_transcript_variant, non_coding_transcript_exon_variant, missense_variant&NMD_transcript_variant, synonymous_variant&NMD_transcript_variant, upstream_gene_variant
rs1736185	19	2813000	A	G	0.286738	0.0472369	0.0050297	88.202	20.2284	5.91017e-21	9.39159	SHBG	THOP1	intron_variant, downstream_gene_variant, intron_variant&non_coding_transcript_variant
rs187429064	19	19380513	A	G	0.0120329	-0.189507	0.0231343	67.1025	15.5888	2.57751e-16	-8.1916	LDL	TM6SF2, AC138430.4	missense_variant, non_coding_transcript_exon_variant, upstream_gene_variant
rs187429064	19	19380513	A	G	0.0120329	-0.167195	0.022985	52.9124	12.4575	3.48739e-13	-7.27409	APOB	TM6SF2, AC138430.4	missense_variant, non_coding_transcript_exon_variant, upstream_gene_variant
rs187429064	19	19380513	A	G	0.0120329	-0.195324	0.0230507	71.8032	16.6238	2.37794e-17	-8.47367	CHO	TM6SF2, AC138430.4	missense_variant, non_coding_transcript_exon_variant, upstream_gene_variant
rs187429064	19	19380513	A	G	0.0120329	-0.126374	0.0223137	32.0753	7.82883	1.4831e-08	-5.66352	TRIG	TM6SF2, AC138430.4	missense_variant, non_coding_transcript_exon_variant, upstream_gene_variant
rs1990990	19	33361794	C	T	0.463136	0.0238492	0.0040874	34.0452	8.26885	5.38456e-09	5.83481	CREA	SLC7A9	upstream_gene_variant
rs2302593	19	46196634	C	G	0.489001	-0.0273398	0.00501128	29.7641	7.31164	4.87933e-08	-5.45565	GLUC	QPCTL, SNRPD2	intron_variant, upstream_gene_variant, intron_variant&NMD_transcript_variant
rs2404713	19	33460536	A	G	0.418188	0.0231029	0.00414251	31.1033	7.61144	2.44658e-08	5.57703	CREA	C19orf40, CEP89	upstream_gene_variant, intron_variant, intron_variant&NMD_transcript_variant, intron_variant&non_coding_transcript_variant, non_coding_transcript_exon_variant, downstream_gene_variant
rs2607234	19	35563834	G	A	0.0512154	-0.122232	0.0112765	117.496	26.6506	2.23563e-27	-10.8395	ALB	HPN-AS1	intron_variant&non_coding_transcript_variant
rs2607234	19	35563834	G	A	0.0512154	-0.0699585	0.0114048	37.6276	9.06741	8.56229e-10	-6.13413	CAL	HPN-AS1	intron_variant&non_coding_transcript_variant
rs2607234	19	35563834	G	A	0.0512154	-0.0733098	0.0114446	41.0317	9.82456	1.49775e-10	-6.40562	TPROT	HPN-AS1	intron_variant&non_coding_transcript_variant
rs2722698	19	44950550	A	G	0.207976	-0.0460228	0.00616221	55.7791	13.091	8.10961e-14	-7.46855	APOB	ZNF229, CTC-512J12.4	intron_variant, intron_variant&non_coding_transcript_variant, intron_variant&NMD_transcript_variant
rs2965169	19	45251156	A	C	0.388853	-0.0794835	0.00514976	238.221	53.0174	9.60727e-54	-15.4344	LDL	BCL3	upstream_gene_variant, non_coding_transcript_exon_variant
rs2965169	19	45251156	A	C	0.388853	-0.105748	0.00511652	427.162	94.1715	6.73752e-95	-20.668	APOB	BCL3	upstream_gene_variant, non_coding_transcript_exon_variant
rs2965169	19	45251156	A	C	0.388853	-0.0644124	0.00513115	157.583	35.4183	3.81681e-36	-12.5532	CHO	BCL3	upstream_gene_variant, non_coding_transcript_exon_variant
rs2965174	19	45245015	G	A	0.474454	-0.0314358	0.00501295	39.3243	9.44498	3.58938e-10	-6.27092	LDL	.	intergenic_variant
rs2965174	19	45245015	G	A	0.474454	-0.0393012	0.00498059	62.2657	14.5227	3.00123e-15	-7.89087	APOB	.	intergenic_variant
rs36005514	19	11190764	G	A	0.0720931	0.055349	0.00968525	32.6586	7.95919	1.09853e-08	5.71477	LDL	.	intergenic_variant
rs36656	19	54664752	A	C	0.496202	0.0322958	0.00473531	46.5153	11.0414	9.09076e-12	6.82021	ALP	LENG1, TMC4	upstream_gene_variant, synonymous_variant, non_coding_transcript_exon_variant, downstream_gene_variant
rs375594987	19	45623467	A	G	0.0139594	0.125368	0.0214066	34.299	8.32549	4.72618e-09	5.85651	APOB	PPP1R37, MARK4	intron_variant, intron_variant&non_coding_transcript_variant
rs3826821	19	49260628	G	A	0.0812141	0.0647893	0.00862868	56.3791	13.2236	5.97585e-14	7.5086	ALP	FGF21, FUT1	intron_variant, upstream_gene_variant
rs3852861	19	45383061	G	T	0.41918	-0.0378957	0.00508232	55.5975	13.0509	8.89406e-14	-7.45638	LDL	PVRL2, CTB-129P6.4	intron_variant, downstream_gene_variant, upstream_gene_variant
rs3852861	19	45383061	G	T	0.41918	-0.0564355	0.00504951	124.912	28.2742	5.31863e-29	-11.1764	APOB	PVRL2, CTB-129P6.4	intron_variant, downstream_gene_variant, upstream_gene_variant
rs405509	19	45408836	G	T	0.484172	0.0910922	0.00503444	327.386	72.448	3.56451e-73	18.0938	LDL	APOE, TOMM40	upstream_gene_variant, downstream_gene_variant
rs405509	19	45408836	G	T	0.484172	-0.0317743	0.00459919	47.7296	11.3105	4.89215e-12	-6.90867	APOA	APOE, TOMM40	upstream_gene_variant, downstream_gene_variant
rs405509	19	45408836	G	T	0.484172	0.128861	0.00500194	663.695	145.629	2.34963e-146	25.7622	APOB	APOE, TOMM40	upstream_gene_variant, downstream_gene_variant
rs405509	19	45408836	G	T	0.484172	0.0675079	0.00501624	181.114	40.5578	2.76822e-41	13.4579	CHO	APOE, TOMM40	upstream_gene_variant, downstream_gene_variant
rs405509	19	45408836	G	T	0.484172	-0.0412017	0.00494399	69.4506	16.106	7.8343e-17	-8.33369	CRP	APOE, TOMM40	upstream_gene_variant, downstream_gene_variant
rs405509	19	45408836	G	T	0.484172	-0.0259685	0.00454259	32.6802	7.96402	1.08638e-08	-5.71667	HDL	APOE, TOMM40	upstream_gene_variant, downstream_gene_variant
rs4803356	19	41207206	C	G	0.0729172	0.0537642	0.0091185	34.7649	8.42943	3.72023e-09	5.89617	ALP	ADCK4	intron_variant, downstream_gene_variant, non_coding_transcript_exon_variant
rs4808579	19	17255734	T	C	0.38868	0.046979	0.00486096	93.4032	21.37	4.2658e-22	9.66455	HBA1C	MYO9B	intron_variant
rs4808959	19	19572108	T	G	0.356668	-0.0313027	0.00522743	35.8581	8.6732	2.12227e-09	-5.98816	CHO	GATAD2A	intron_variant, upstream_gene_variant, intron_variant&NMD_transcript_variant
rs492602	19	49206417	G	A	0.497084	-0.0322033	0.00504129	40.8054	9.77425	1.68171e-10	-6.38791	LDL	FUT2	synonymous_variant
rs492602	19	49206417	G	A	0.497084	0.109631	0.00474756	533.241	117.254	5.57186e-118	23.0921	ALP	FUT2	synonymous_variant
rs492602	19	49206417	G	A	0.497084	-0.0320567	0.00500875	40.9617	9.809	1.55239e-10	-6.40014	APOB	FUT2	synonymous_variant
rs492602	19	49206417	G	A	0.497084	-0.0339991	0.00502307	45.8137	10.8859	1.30047e-11	-6.76859	CHO	FUT2	synonymous_variant
rs492602	19	49206417	G	A	0.497084	-0.0391215	0.00466951	70.1922	16.2692	5.38022e-17	-8.37807	GGT	FUT2	synonymous_variant
rs492602	19	49206417	G	A	0.497084	-0.0283074	0.0050749	31.1133	7.61368	2.434e-08	-5.57792	TPROT	FUT2	synonymous_variant
rs492602	19	49206417	G	A	0.497084	0.0384735	0.0048914	61.8668	14.4348	3.67451e-15	7.86554	URA	FUT2	synonymous_variant
rs5117	19	45418790	T	C	0.233713	-0.0681	0.00596635	130.28	29.4487	3.55877e-30	-11.414	LDL	APOC1	intron_variant, intron_variant&NMD_transcript_variant
rs5117	19	45418790	T	C	0.233713	-0.0343307	0.00573643	35.8163	8.66388	2.1683e-09	-5.98468	ALT	APOC1	intron_variant, intron_variant&NMD_transcript_variant
rs5117	19	45418790	T	C	0.233713	-0.0904524	0.00592783	232.835	51.8429	1.43582e-52	-15.2589	APOB	APOC1	intron_variant, intron_variant&NMD_transcript_variant
rs5117	19	45418790	T	C	0.233713	-0.0429092	0.00594478	52.0991	12.2776	5.27716e-13	-7.21796	CHO	APOC1	intron_variant, intron_variant&NMD_transcript_variant
rs5117	19	45418790	T	C	0.233713	-0.130448	0.00585916	495.68	109.082	8.27942e-110	-22.2639	CRP	APOC1	intron_variant, intron_variant&NMD_transcript_variant
rs5117	19	45418790	T	C	0.233713	0.0775145	0.0057547	181.435	40.6279	2.35559e-41	13.4698	TRIG	APOC1	intron_variant, intron_variant&NMD_transcript_variant
rs55840997	19	44480979	G	A	0.0196729	-0.102743	0.0179529	32.7518	7.98001	1.0471e-08	-5.72292	APOB	ZNF155	intron_variant
rs55959020	19	17301935	G	A	0.033957	0.101292	0.0125615	65.023	15.1306	7.40287e-16	8.06369	SHBG	MYO9B	synonymous_variant, downstream_gene_variant
rs60746284	19	50012573	C	T	0.102766	-0.0657102	0.0081855	64.443	15.0028	9.93574e-16	-8.02763	ALB	FCGRT	upstream_gene_variant, intron_variant&non_coding_transcript_variant
rs60746284	19	50012573	C	T	0.102766	-0.0664774	0.00830758	64.0323	14.9122	1.22405e-15	-8.00202	TPROT	FCGRT	upstream_gene_variant, intron_variant&non_coding_transcript_variant
rs62116889	19	45022560	T	C	0.0670305	-0.0644085	0.0100375	41.1749	9.85636	1.392e-10	-6.41679	LDL	CEACAM20	intron_variant&non_coding_transcript_variant
rs62116889	19	45022560	T	C	0.0670305	-0.0830659	0.00997274	69.3772	16.0898	8.13205e-17	-8.3293	APOB	CEACAM20	intron_variant&non_coding_transcript_variant
rs62116988	19	44296689	G	A	0.0352633	-0.0774757	0.0135164	32.8554	8.00317	9.92727e-09	-5.73198	APOB	LYPD5, AC115522.3	downstream_gene_variant
rs7247198	19	10590508	G	C	0.0762976	-0.0533201	0.00901731	34.9645	8.47396	3.35769e-09	-5.91308	IGF1	.	intergenic_variant
rs7247349	19	33887160	A	C	0.497552	-0.0348282	0.00464144	56.3062	13.2075	6.20155e-14	-7.50375	GGT	PEPD	intron_variant, upstream_gene_variant
rs7252574	19	8441779	T	C	0.483344	-0.0250893	0.00458604	29.9295	7.34868	4.48043e-08	-5.4708	APOA	ANGPTL4, RAB11B-AS1	downstream_gene_variant, intron_variant&non_coding_transcript_variant
rs7252574	19	8441779	T	C	0.483344	-0.0285608	0.00452961	39.7576	9.54133	2.87521e-10	-6.30536	HDL	ANGPTL4, RAB11B-AS1	downstream_gene_variant, intron_variant&non_coding_transcript_variant
rs7253956	19	33392490	C	T	0.425978	0.0225702	0.00411408	30.097	7.38619	4.1097e-08	5.48609	CREA	CEP89	intron_variant, intron_variant&NMD_transcript_variant
rs7259567	19	45566080	G	T	0.478767	-0.0287714	0.00499121	33.2284	8.08648	8.19445e-09	-5.76441	APOB	CLASRP	intron_variant, intron_variant&NMD_transcript_variant, upstream_gene_variant, downstream_gene_variant
rs72658867	19	11231203	G	A	0.0124981	-0.305183	0.0225758	182.74	40.9128	1.22236e-41	-13.5181	LDL	LDLR	splice_donor_5th_base_variant&intron_variant, intron_variant, downstream_gene_variant
rs72658867	19	11231203	G	A	0.0124981	-0.292619	0.0224301	170.194	38.1732	6.7112e-39	-13.0458	APOB	LDLR	splice_donor_5th_base_variant&intron_variant, intron_variant, downstream_gene_variant
rs72658867	19	11231203	G	A	0.0124981	-0.263157	0.0224942	136.864	30.8889	1.29152e-31	-11.6989	CHO	LDLR	splice_donor_5th_base_variant&intron_variant, intron_variant, downstream_gene_variant
rs73013176	19	11147526	T	C	0.0109484	-0.18523	0.0241516	58.8209	13.7627	1.72703e-14	-7.66947	LDL	SMARCA4	intron_variant, intron_variant&non_coding_transcript_variant, downstream_gene_variant
rs73013176	19	11147526	T	C	0.0109484	-0.177647	0.0239957	54.8087	12.8766	1.32862e-13	-7.40328	APOB	SMARCA4	intron_variant, intron_variant&non_coding_transcript_variant, downstream_gene_variant
rs73013176	19	11147526	T	C	0.0109484	-0.155276	0.0240643	41.6356	9.95871	1.09974e-10	-6.45255	CHO	SMARCA4	intron_variant, intron_variant&non_coding_transcript_variant, downstream_gene_variant
rs73056079	19	50022939	T	C	0.102732	-0.0505124	0.00819378	38.0038	9.15116	7.06057e-10	-6.16472	ALB	FCGRT	intron_variant, intron_variant&non_coding_transcript_variant, intron_variant&NMD_transcript_variant
rs73056079	19	50022939	T	C	0.102732	-0.0621822	0.00831599	55.9118	13.1204	7.57879e-14	-7.47743	TPROT	FCGRT	intron_variant, intron_variant&non_coding_transcript_variant, intron_variant&NMD_transcript_variant
rs74942924	19	11063665	G	A	0.0386472	-0.085695	0.0129807	43.5826	10.391	4.06443e-11	-6.60172	LDL	.	intergenic_variant
rs74942924	19	11063665	G	A	0.0386472	-0.0799171	0.0128969	38.3979	9.23887	5.76939e-10	-6.19661	APOB	.	intergenic_variant
rs74942924	19	11063665	G	A	0.0386472	-0.0809717	0.0129338	39.1936	9.41589	3.83804e-10	-6.26047	CHO	.	intergenic_variant
rs75162188	19	11131403	T	C	0.0452257	0.0669035	0.0120467	30.8434	7.5533	2.79705e-08	5.55368	LDL	SMARCA4, CTC-215O4.4	intron_variant, non_coding_transcript_exon_variant, intron_variant&non_coding_transcript_variant, upstream_gene_variant
rs75162188	19	11131403	T	C	0.0452257	0.0658983	0.0120031	30.1411	7.39606	4.01735e-08	5.49011	CHO	SMARCA4, CTC-215O4.4	intron_variant, non_coding_transcript_exon_variant, intron_variant&non_coding_transcript_variant, upstream_gene_variant
rs79701229	19	45384931	G	A	0.0123127	0.167055	0.0228323	53.5332	12.5947	2.54273e-13	7.31661	LDL	PVRL2, CTB-129P6.4	intron_variant, downstream_gene_variant, upstream_gene_variant
rs79701229	19	45384931	G	A	0.0123127	0.23665	0.0226849	108.827	24.7519	1.77052e-25	10.432	APOB	PVRL2, CTB-129P6.4	intron_variant, downstream_gene_variant, upstream_gene_variant
rs79701229	19	45384931	G	A	0.0123127	0.142065	0.0227497	38.9962	9.37199	4.24629e-10	6.2447	CHO	PVRL2, CTB-129P6.4	intron_variant, downstream_gene_variant, upstream_gene_variant
rs79701229	19	45384931	G	A	0.0123127	-0.209375	0.0224221	87.1962	20.0076	9.82653e-21	-9.33789	CRP	PVRL2, CTB-129P6.4	intron_variant, downstream_gene_variant, upstream_gene_variant
rs8100419	19	45718624	A	G	0.0870675	0.0489585	0.00882538	30.7743	7.53783	2.89848e-08	5.54747	APOB	EXOC3L2, MARK4, AC006126.3	intron_variant
rs8104660	19	45191509	C	T	0.0451103	-0.14091	0.0120881	135.883	30.6745	2.11592e-31	-11.6569	LDL	CEACAM19, CTB-171A8.1	downstream_gene_variant, intron_variant&non_coding_transcript_variant
rs8104660	19	45191509	C	T	0.0451103	-0.190312	0.0120101	251.096	55.8245	1.49796e-56	-15.846	APOB	CEACAM19, CTB-171A8.1	downstream_gene_variant, intron_variant&non_coding_transcript_variant
rs8104660	19	45191509	C	T	0.0451103	-0.106248	0.0120444	77.8168	17.9467	1.13058e-18	-8.82136	CHO	CEACAM19, CTB-171A8.1	downstream_gene_variant, intron_variant&non_coding_transcript_variant
rs881273	19	33182320	G	A	0.496325	-0.0224016	0.00406863	30.3154	7.43509	3.67206e-08	-5.50593	CREA	NUDT19, CTD-2538C1.2	upstream_gene_variant, non_coding_transcript_exon_variant
rs91755	19	10473570	G	T	0.480352	0.0268483	0.00477251	31.6476	7.73321	1.84837e-08	5.62561	IGF1	TYK2	intron_variant, upstream_gene_variant
rs11574736	20	43039537	G	C	0.172058	-0.0344745	0.00602353	32.7563	7.98102	1.04467e-08	-5.72331	SHBG	HNF4A, MIR3646	intron_variant, intron_variant&NMD_transcript_variant, downstream_gene_variant
rs12480410	20	32988678	T	C	0.494925	0.0225623	0.00407436	30.6654	7.51345	3.06584e-08	5.53763	CREA	ITCH, CDC42P1	intron_variant, downstream_gene_variant, intron_variant&non_coding_transcript_variant
rs1800961	20	43042364	C	T	0.0320218	-0.130771	0.0130015	101.166	23.0726	8.46058e-24	-10.0581	APOA	HNF4A	missense_variant, 3_prime_UTR_variant&NMD_transcript_variant
rs1800961	20	43042364	C	T	0.0320218	-0.097868	0.0140465	48.5452	11.4911	3.22775e-12	-6.96743	CHO	HNF4A	missense_variant, 3_prime_UTR_variant&NMD_transcript_variant
rs1800961	20	43042364	C	T	0.0320218	-0.107224	0.0139271	59.2743	13.8628	1.37151e-14	-7.69895	CRP	HNF4A	missense_variant, 3_prime_UTR_variant&NMD_transcript_variant
rs1800961	20	43042364	C	T	0.0320218	-0.119443	0.0128503	86.3961	19.8319	1.47265e-20	-9.29496	HDL	HNF4A	missense_variant, 3_prime_UTR_variant&NMD_transcript_variant
rs2207132	20	39142516	G	A	0.0325982	0.0918636	0.0139089	43.6215	10.3996	3.98474e-11	6.60466	LDL	.	intergenic_variant
rs2207132	20	39142516	G	A	0.0325982	0.0769271	0.0136888	31.5811	7.71833	1.9128e-08	5.61971	APOB	.	intergenic_variant
rs2207132	20	39142516	G	A	0.0325982	0.0887969	0.0139452	40.5457	9.71653	1.92075e-10	6.36756	CHO	.	intergenic_variant
rs2618567	20	17844492	T	G	0.340177	0.0301332	0.00512331	34.593	8.39108	4.06368e-09	5.88159	APOB	.	intergenic_variant
rs2762943	20	52790786	G	T	0.0777624	-0.0575343	0.00939029	37.5401	9.04793	8.95509e-10	-6.127	VITD	CYP24A1	upstream_gene_variant
rs2762943	20	52790786	G	T	0.0777624	-0.0594685	0.00939876	40.0343	9.60286	2.4954e-10	-6.32727	CAL	CYP24A1	upstream_gene_variant
rs3736802	20	33604042	C	T	0.484928	0.0267775	0.00407081	43.2689	10.3214	4.7709e-11	6.57793	CREA	TRPC4AP	intron_variant
rs3795128	20	39774163	T	C	0.481242	0.0300036	0.00495446	36.6735	8.85492	1.39663e-09	6.05588	LDL	PLCG1	intron_variant, intron_variant&non_coding_transcript_variant
rs3795128	20	39774163	T	C	0.481242	0.0310976	0.00487606	40.6741	9.74507	1.79858e-10	6.37761	APOB	PLCG1	intron_variant, intron_variant&non_coding_transcript_variant
rs3795128	20	39774163	T	C	0.481242	0.028084	0.0049674	31.964	7.80394	1.57058e-08	5.65366	CHO	PLCG1	intron_variant, intron_variant&non_coding_transcript_variant
rs3848715	20	44564682	A	G	0.498272	0.0249185	0.0045371	30.164	7.40119	3.97018e-08	5.49216	HDL	PCIF1	intron_variant
rs390123	20	25480105	C	G	0.481292	-0.047774	0.0047046	103.119	23.5008	3.15646e-24	-10.1547	ALP	NINL	intron_variant, upstream_gene_variant
rs6037158	20	25595466	C	A	0.478927	-0.0469311	0.00471326	99.1469	22.6299	2.34477e-23	-9.95725	ALP	NANP, RNU6ATAC17P	3_prime_UTR_variant, downstream_gene_variant
rs6050463	20	25208990	G	A	0.493867	-0.0405824	0.00470177	74.4995	17.2171	6.06597e-18	-8.6313	ALP	ENTPD6, AL035252.1	downstream_gene_variant, upstream_gene_variant
rs6058093	20	33213196	C	A	0.497439	0.0253101	0.00407572	38.5637	9.27575	5.29968e-10	6.20997	CREA	PIGU	intron_variant, intron_variant&non_coding_transcript_variant
rs6072339	20	39955307	T	C	0.479533	0.0300521	0.00495235	36.8237	8.88837	1.29309e-09	6.06825	LDL	RP3-450M14.1	upstream_gene_variant
rs6072339	20	39955307	T	C	0.479533	0.0314889	0.00487398	41.7395	9.9818	1.0428e-10	6.46061	APOB	RP3-450M14.1	upstream_gene_variant
rs6072339	20	39955307	T	C	0.479533	0.0278618	0.00496529	31.487	7.69727	2.00784e-08	5.61131	CHO	RP3-450M14.1	upstream_gene_variant
rs6083824	20	25363057	A	G	0.480205	-0.0486118	0.00469985	106.983	24.3478	4.48952e-25	-10.3433	ALP	ABHD12	intron_variant, intron_variant&NMD_transcript_variant
rs6086540	20	8603950	C	G	0.492861	0.026818	0.00476557	31.6682	7.73781	1.8289e-08	5.62745	HBA1C	PLCB1	intron_variant
rs6088618	20	33409350	G	A	0.437962	0.0295379	0.00411086	51.629	12.1736	6.70502e-13	7.18533	CREA	NCOA6	intron_variant, 5_prime_UTR_variant
rs6088744	20	33750142	T	C	0.479285	0.0274364	0.00408199	45.1764	10.7446	1.80053e-11	6.72133	CREA	EDEM2	intron_variant
rs6107073	20	25716363	C	T	0.475706	0.0440269	0.00471763	87.0939	19.9851	1.0349e-20	9.33242	ALP	VN1R108P	downstream_gene_variant
rs6108787	20	10967214	T	G	0.478546	0.0287271	0.00492898	33.9679	8.25159	5.60286e-09	5.8282	DBP	RP11-103J8.1	upstream_gene_variant, intron_variant&non_coding_transcript_variant
rs9927	20	25277244	A	G	0.495214	-0.0402089	0.00470752	72.9559	16.8775	1.32587e-17	-8.54142	ALP	PYGB, ABHD12	3_prime_UTR_variant, downstream_gene_variant, intron_variant, intron_variant&NMD_transcript_variant, non_coding_transcript_exon_variant
rs99595	20	55989808	C	T	0.480483	0.0261511	0.00474592	30.3627	7.44568	3.5836e-08	5.51023	HBA1C	.	intergenic_variant
rs2835268	21	37449136	G	C	0.489374	-0.0272139	0.0047788	32.4297	7.90804	1.23583e-08	-5.69471	IGF1	CBR1, SETD4, AP000688.14	downstream_gene_variant, intron_variant, upstream_gene_variant, intron_variant&non_coding_transcript_variant
rs11090305	22	24407483	T	C	0.179294	-0.0451158	0.00612729	54.2152	12.7455	1.7968e-13	-7.36309	GGT	CABIN1, AP000351.13	upstream_gene_variant
rs118133842	22	24726917	A	G	0.0202086	0.104427	0.0167384	38.9223	9.35556	4.41001e-10	6.23877	GGT	SPECC1L, SPECC1L-ADORA2A	intron_variant, intron_variant&NMD_transcript_variant, downstream_gene_variant
rs13055235	22	44400149	G	A	0.0427707	0.0749215	0.0119494	39.3116	9.44215	3.61285e-10	6.2699	ALT	PARVB, SAMM50	intron_variant, intron_variant&non_coding_transcript_variant
rs13055235	22	44400149	G	A	0.0427707	0.0843411	0.011972	49.6298	11.7312	1.85695e-12	7.04486	AST	PARVB, SAMM50	intron_variant, intron_variant&non_coding_transcript_variant
rs145444539	22	24930972	G	A	0.0301388	0.0822007	0.0137955	35.504	8.59427	2.54525e-09	5.95852	GGT	.	intergenic_variant
rs16978740	22	24983264	C	T	0.0266306	-0.11036	0.0146339	56.8725	13.3325	4.6505e-14	-7.54139	GGT	GGT1, FAM211B, SNRPD3	intron_variant, intron_variant&NMD_transcript_variant, intron_variant&non_coding_transcript_variant, downstream_gene_variant
rs181858029	22	24886436	C	T	0.0175272	0.112458	0.018037	38.8735	9.3447	4.52168e-10	6.23485	GGT	UPB1, ADORA2A-AS1	upstream_gene_variant, intron_variant&non_coding_transcript_variant, intron_variant
rs186765281	22	25010855	A	G	0.0148174	-0.357318	0.0194772	336.554	74.4446	3.59253e-75	-18.3455	GGT	GGT1, SNRPD3	missense_variant, downstream_gene_variant, missense_variant&NMD_transcript_variant, intron_variant&non_coding_transcript_variant, non_coding_transcript_exon_variant
rs2006092	22	24995668	A	G	0.353427	0.190091	0.00492771	1488.11	324.823	0	38.5759	GGT	GGT1, SNRPD3, AP000356.2	intron_variant, upstream_gene_variant, intron_variant&NMD_transcript_variant, downstream_gene_variant
rs374597	22	18437043	C	T	0.476811	-0.0297826	0.00472971	39.651	9.51763	3.03648e-10	-6.29692	GGT	MICAL3	intron_variant, intron_variant&NMD_transcript_variant
rs418652	22	18467944	C	T	0.492869	0.0258817	0.00471769	30.0974	7.38628	4.10885e-08	5.4861	GGT	MICAL3, MIR648, XXbac-B476C20.14	intron_variant, upstream_gene_variant, intron_variant&NMD_transcript_variant
rs5751792	22	24401542	A	G	0.469102	0.0354472	0.00472393	56.3063	13.2075	6.20155e-14	7.50375	GGT	GSTTP2, AP000351.13	intron_variant&non_coding_transcript_variant, downstream_gene_variant, non_coding_transcript_exon_variant
rs5760687	22	25217890	T	G	0.499318	-0.0281784	0.00472575	35.5543	8.60548	2.48039e-09	-5.96274	GGT	SGSM1	intron_variant
rs6519133	22	39096602	T	C	0.392018	-0.0375184	0.00504893	55.2193	12.9674	1.07795e-13	-7.43096	CRP	JOSD1	5_prime_UTR_variant, intron_variant, non_coding_transcript_exon_variant, upstream_gene_variant
rs6519133	22	39096602	T	C	0.392018	0.0285948	0.00485027	34.7569	8.42764	3.7356e-09	5.89551	GGT	JOSD1	5_prime_UTR_variant, intron_variant, non_coding_transcript_exon_variant, upstream_gene_variant
rs73152509	22	24943369	C	T	0.0817989	0.0588013	0.0086244	46.4854	11.0348	9.22996e-12	6.81802	GGT	GUCD1	intron_variant&NMD_transcript_variant, intron_variant, downstream_gene_variant, upstream_gene_variant, intron_variant&non_coding_transcript_variant
rs75779601	22	24603473	T	C	0.0362447	-0.0839516	0.0126197	44.2546	10.5401	2.88337e-11	-6.65242	GGT	.	intergenic_variant
rs9610630	22	37405865	C	T	0.472161	-0.0301269	0.00475446	40.1519	9.62901	2.34958e-10	-6.33656	HBA1C	TST, TEX33, Y_RNA	downstream_gene_variant, upstream_gene_variant
rs9612549	22	24455054	G	A	0.0707092	0.0516133	0.00915596	31.7772	7.76217	1.72914e-08	5.63713	GGT	CABIN1	intron_variant, downstream_gene_variant

## Sheet: Table S3
rsID	Coordinates (hg19)	Alt	Ref	Trait	EFO	Study	PMID	Ancestry	Year	Estimate	SE	P-value	Direction	N	Cases	Controls	Number of studies	Unit	Dataset
rs2241474	chr4:10086015	C	T	Mean corpuscular hemoglobin	EFO_0004586	Astle W	27863252	European	2016	-0.01611	0.003537	5.24e-06	-	173480	0	173480	2	IVNT	Astle-W_Blood-Cell-Traits_EUR_2016
rs2241474	chr4:10086015	C	T	Mean corpuscular volume	EFO_0004586	Astle W	27863252	European	2016	-0.018	0.003526	3.329e-07	-	173480	0	173480	2	IVNT	Astle-W_Blood-Cell-Traits_EUR_2016
rs2241474	chr4:10086015	C	T	Red blood cell count	EFO_0004586	Astle W	27863252	European	2016	0.01732	0.003553	1.089e-06	+	173480	0	173480	2	IVNT	Astle-W_Blood-Cell-Traits_EUR_2016
rs2241474	chr4:10086015	C	T	Comparative height size at age 10	-	Neale B	UKBB	European	2017	0.007614	0.00166	4.474e-06	+	332021	0	332021	1	-	Neale-B_UKBB_EUR_2017
rs2241474	chr4:10086015	C	T	Self-reported gout	EFO_0004274	Neale B	UKBB	European	2017	0.001492	0.0002873	2.087e-07	+	337159	4807	332352	1	risk diff	Neale-B_UKBB_EUR_2017
rs2231142	chr4:89052323	T	G	Gout	-	Dehghan A	18834626	Mixed	2008	NA	NA	3.3e-15	NA	11847	-	-	-	-	GRASP
rs2231142	chr4:89052323	T	G	Gout	-	Yang Q	20884846	European	2010	NA	NA	4.41e-23	NA	28283	-	-	-	-	GRASP
rs2231142	chr4:89052323	T	G	Gout	-	Tin A	21768215	African	2011	NA	NA	3.1e-10	NA	8651	-	-	-	-	GRASP
rs2231142	chr4:89052323	T	G	Gout	-	Sulem P	21983786	European	2011	NA	NA	2.8e-12	NA	58149	-	-	-	-	GRASP
rs2231142	chr4:89052323	T	G	Gout	-	GUGC	23263486	European	2012	NA	NA	4.98e-32	NA	69374	-	-	-	-	GRASP
rs2231142	chr4:89052323	T	G	Gout male	-	Dehghan A	18834626	Mixed	2008	NA	NA	1.58e-09	NA	11847	-	-	-	-	GRASP
rs2231142	chr4:89052323	T	G	Gout male	-	Sulem P	21983786	European	2011	NA	NA	1.7e-10	NA	58149	-	-	-	-	GRASP
rs2231142	chr4:89052323	T	G	Serum urate	NCIT_C64814	Yang Q	20884846	European	2010	NA	NA	2.46e-75	NA	28283	-	-	-	-	GRASP
rs2231142	chr4:89052323	T	G	Serum urate	NCIT_C64814	Tin A	21768215	African	2011	NA	NA	1.9e-44	NA	8651	-	-	-	-	GRASP
rs2231142	chr4:89052323	T	G	Serum urate	NCIT_C64814	GUGC	23263486	European	2012	NA	NA	1.01e-134	NA	69374	-	-	-	-	GRASP
rs2231142	chr4:89052323	T	G	Urate	NCIT_C64814;NCIT_C62652	Kamatani Y	20139978	East Asian	2010	NA	NA	1.62e-13	NA	14700	-	-	-	-	GRASP
rs2231142	chr4:89052323	T	G	Uric acid	NCIT_C62652;CHEBI_27226	Dehghan A	18834626	Mixed	2008	NA	NA	2.5e-60	NA	11847	-	-	-	-	GRASP
rs2231142	chr4:89052323	T	G	Uric acid females	NCIT_C62652;CHEBI_27226	Dehghan A	18834626	Mixed	2008	NA	NA	1.36e-09	NA	11847	-	-	-	-	GRASP
rs2231142	chr4:89052323	T	G	Uric acid females	NCIT_C62652;CHEBI_27226	Kolz M	19503597	European	2009	NA	NA	1.13e-10	NA	28141	-	-	-	-	GRASP
rs2231142	chr4:89052323	T	G	Uric acid females in serum	NCIT_C62652;CHEBI_27226	Sulem P	21983786	European	2011	NA	NA	4.1e-09	NA	58149	-	-	-	-	GRASP
rs2231142	chr4:89052323	T	G	Uric acid in serum	NCIT_C61034;CMO_0002041	Sulem P	21983786	European	2011	NA	NA	2.3e-20	NA	58149	-	-	-	-	GRASP
rs2231142	chr4:89052323	T	G	Uric acid in serum	NCIT_C61034;CMO_0002041	Karns R	22229870	European	2012	NA	NA	5.14e-06	NA	1300	-	-	-	-	GRASP
rs2231142	chr4:89052323	T	G	Uric acid males	NCIT_C62652;CHEBI_27226	Dehghan A	18834626	Mixed	2008	NA	NA	5.05e-24	NA	11847	-	-	-	-	GRASP
rs2231142	chr4:89052323	T	G	Uric acid males	NCIT_C62652;CHEBI_27226	Kolz M	19503597	European	2009	NA	NA	2.25e-18	NA	28141	-	-	-	-	GRASP
rs2231142	chr4:89052323	T	G	Gout	EFO_0004274	GUGC	23263486	European	2012	0.54	0.045	4.979e-32	+	69374	2115	67259	14	log OR	GUGC_Gout_EUR_2012
rs2231142	chr4:89052323	T	G	Serum urate	EFO_0004531	GUGC	23263486	European	2012	0.22	0.0091	4.432e-116	+	110093	0	110093	48	mg/dl	GUGC_Urate_EUR_2012
rs2231142	chr4:89052323	T	G	Gout	EFO_0004274	Sulem P	21983786	European	2011	NA	NA	3e-12	NA	-	-	-	-	-	NHGRI-EBI_GWAS_Catalog
rs2231142	chr4:89052323	T	G	Serum uric acid levels	EFO_0004761	Sulem P	21983786	European	2011	0.16	0.01727	2e-20	+	-	-	-	-	SD increase	NHGRI-EBI_GWAS_Catalog
rs2231142	chr4:89052323	T	G	Serum uric acid levels	EFO_0004761	Yang B	24513273	East Asian	2014	0.045	0.003304	3e-42	+	-	-	-	-	unit increase	NHGRI-EBI_GWAS_Catalog
rs2231142	chr4:89052323	T	G	Serum uric acid levels in response to allopurinol in gout	EFO_0006337;EFO_0004274;EFO_0004761	Wen CC	25676789	Mixed	2015	NA	NA	3e-07	NA	-	-	-	-	unit decrease	NHGRI-EBI_GWAS_Catalog
rs2231142	chr4:89052323	T	G	Urate levels	EFO_0004531	Dehghan A	18834626	Mixed	2008	NA	NA	3e-60	NA	-	-	-	-	-	NHGRI-EBI_GWAS_Catalog
rs2231142	chr4:89052323	T	G	Urate levels	EFO_0004531	GUGC	23263486	European	2012	0.217	0.008784	1e-134	+	-	-	-	-	mg/dl increase	NHGRI-EBI_GWAS_Catalog
rs2231142	chr4:89052323	T	G	Urate levels in lean individuals	EFO_0004531;EFO_0005936	Huffman JE	25811787	European	2015	-0.223	0.0198	2e-29	-	-	-	-	-	kg/m2 decrease	NHGRI-EBI_GWAS_Catalog
rs2231142	chr4:89052323	T	G	Urate levels in obese individuals	EFO_0007041;EFO_0004531	Huffman JE	25811787	European	2015	-0.135	0.02534	1e-07	-	-	-	-	-	kg/m2 decrease	NHGRI-EBI_GWAS_Catalog
rs2231142	chr4:89052323	T	G	Urate levels in overweight individuals	EFO_0004531;EFO_0005935	Huffman JE	25811787	European	2015	-0.215	0.01875	2e-30	-	-	-	-	-	kg/m2 decrease	NHGRI-EBI_GWAS_Catalog
rs2231142	chr4:89052323	T	G	Urate levels in overweight individuals	EFO_0004531;EFO_0005935	Huffman JE	25811787	European	2015	-0.19	0.02833	2e-11	-	-	-	-	-	kg/m2 decrease	NHGRI-EBI_GWAS_Catalog
rs2231142	chr4:89052323	T	G	Uric acid levels	EFO_0004761	Kolz M	19503597	European	2009	0.22	0.02512	2e-18	+	-	-	-	-	mg/dl increase	NHGRI-EBI_GWAS_Catalog
rs2231142	chr4:89052323	T	G	Uric acid levels	EFO_0004761	Kolz M	19503597	European	2009	0.14	0.02165	1e-10	+	-	-	-	-	mg/dl increase	NHGRI-EBI_GWAS_Catalog
rs2231142	chr4:89052323	T	G	Uric acid levels	EFO_0004761	Karns R	22229870	European	2012	27.4	6.002	5e-06	+	-	-	-	-	umol/L increase	NHGRI-EBI_GWAS_Catalog
rs2231142	chr4:89052323	T	G	Basal metabolic rate	EFO_0007777	Neale B	UKBB	European	2017	-0.01184	0.002534	2.95e-06	-	331307	0	331307	1	IVNT	Neale-B_UKBB_EUR_2017
rs2231142	chr4:89052323	T	G	Body mass index	EFO_0004340	Neale B	UKBB	European	2017	-0.01791	0.00378	2.16e-06	-	336107	0	336107	1	IVNT	Neale-B_UKBB_EUR_2017
rs2231142	chr4:89052323	T	G	Impedance of leg left	-	Neale B	UKBB	European	2017	0.02104	0.003484	1.555e-09	+	331296	0	331296	1	IVNT	Neale-B_UKBB_EUR_2017
rs2231142	chr4:89052323	T	G	Leg fat-free mass left	-	Neale B	UKBB	European	2017	-0.01222	0.002516	1.198e-06	-	331258	0	331258	1	IVNT	Neale-B_UKBB_EUR_2017
rs2231142	chr4:89052323	T	G	Leg fat-free mass right	-	Neale B	UKBB	European	2017	-0.01225	0.002515	1.109e-06	-	331285	0	331285	1	IVNT	Neale-B_UKBB_EUR_2017
rs2231142	chr4:89052323	T	G	Leg predicted mass left	-	Neale B	UKBB	European	2017	-0.01195	0.002499	1.729e-06	-	331253	0	331253	1	IVNT	Neale-B_UKBB_EUR_2017
rs2231142	chr4:89052323	T	G	Leg predicted mass right	-	Neale B	UKBB	European	2017	-0.01217	0.002499	1.107e-06	-	331285	0	331285	1	IVNT	Neale-B_UKBB_EUR_2017
rs2231142	chr4:89052323	T	G	Self-reported gout	EFO_0004274	Neale B	UKBB	European	2017	0.01354	0.0004513	1.675e-197	+	337159	4807	332352	1	risk diff	Neale-B_UKBB_EUR_2017
rs2231142	chr4:89052323	T	G	Treatment with colchicine	EFO_0007056	Neale B	UKBB	European	2017	0.0004703	8.609e-05	4.702e-08	+	337159	170	336989	1	risk diff	Neale-B_UKBB_EUR_2017
rs2231142	chr4:89052323	T	G	Weight	EFO_0004338	Neale B	UKBB	European	2017	-0.0152	0.003339	5.3e-06	-	336227	0	336227	1	IVNT	Neale-B_UKBB_EUR_2017
rs2231142	chr4:89052323	T	G	Whole body fat-free mass	-	Neale B	UKBB	European	2017	-0.01107	0.002416	4.658e-06	-	331291	0	331291	1	IVNT	Neale-B_UKBB_EUR_2017
rs2231142	chr4:89052323	T	G	Whole body water mass	-	Neale B	UKBB	European	2017	-0.01133	0.00242	2.832e-06	-	331315	0	331315	1	IVNT	Neale-B_UKBB_EUR_2017
rs2231142	chr4:89052323	T	G	Uric acid	NCIT_C62652;CHEBI_27226	Dehghan A	18834626	Mixed	2008	NA	NA	3e-60	NA	-	-	-	-	-	dbGaP
rs2231142	chr4:89052323	T	G	Uric acid	NCIT_C62652;CHEBI_27226	Kolz M	19503597	European	2009	NA	NA	1e-10	NA	-	-	-	-	-	dbGaP
rs2231142	chr4:89052323	T	G	Uric acid	NCIT_C62652;CHEBI_27226	Kolz M	19503597	European	2009	NA	NA	2e-18	NA	-	-	-	-	-	dbGaP
rs2231142	chr4:89052323	T	G	Uric acid	NCIT_C62652;CHEBI_27226	Karns R	22229870	European	2012	NA	NA	5e-06	NA	-	-	-	-	-	dbGaP
rs2868941	chr4:10509699	C	T	Gout	-	GUGC	23263486	European	2012	NA	NA	4.06e-07	NA	69374	-	-	-	-	GRASP
rs2868941	chr4:10509699	C	T	Serum urate	NCIT_C64814	Yang Q	20884846	European	2010	NA	NA	2.5e-17	NA	28283	-	-	-	-	GRASP
rs2868941	chr4:10509699	C	T	Serum urate	NCIT_C64814	GUGC	23263486	European	2012	NA	NA	3.19e-58	NA	69374	-	-	-	-	GRASP
rs2868941	chr4:10509699	C	T	Uric acid	NCIT_C62652;CHEBI_27226	Kolz M	19503597	European	2009	NA	NA	1.32e-19	NA	28141	-	-	-	-	GRASP
rs2868941	chr4:10509699	C	T	Gout	EFO_0004274	GUGC	23263486	European	2012	0.19	0.038	4.058e-07	+	69374	2115	67259	14	log OR	GUGC_Gout_EUR_2012
rs2868941	chr4:10509699	C	T	Serum urate	EFO_0004531	GUGC	23263486	European	2012	0.1	0.006	3.191e-58	+	109899	0	109899	48	mg/dl	GUGC_Urate_EUR_2012
rs2868941	chr4:10509699	C	T	Treatment with allopurinol	EFO_0007056	Neale B	UKBB	European	2017	0.001892	0.0002853	3.354e-11	+	337159	3819	333340	1	risk diff	Neale-B_UKBB_EUR_2017
rs942379	chr6:25849620	A	G	Hemoglobin concentration	EFO_0004586	Astle W	27863252	European	2016	-0.02726	0.003557	1.794e-14	-	173480	0	173480	2	IVNT	Astle-W_Blood-Cell-Traits_EUR_2016
rs942379	chr6:25849620	A	G	Mean corpuscular hemoglobin	EFO_0004586	Astle W	27863252	European	2016	-0.05079	0.003542	1.219e-46	-	173480	0	173480	2	IVNT	Astle-W_Blood-Cell-Traits_EUR_2016
rs942379	chr6:25849620	A	G	Mean corpuscular hemoglobin concentration	EFO_0004586	Astle W	27863252	European	2016	-0.03452	0.003474	2.908e-23	-	173480	0	173480	2	IVNT	Astle-W_Blood-Cell-Traits_EUR_2016
rs942379	chr6:25849620	A	G	Mean corpuscular volume	EFO_0004586	Astle W	27863252	European	2016	-0.03945	0.00353	5.38e-29	-	173480	0	173480	2	IVNT	Astle-W_Blood-Cell-Traits_EUR_2016
rs942379	chr6:25849620	A	G	Red cell distribution width	EFO_0004586	Astle W	27863252	European	2016	0.02712	0.003548	2.133e-14	+	173480	0	173480	2	IVNT	Astle-W_Blood-Cell-Traits_EUR_2016
rs942379	chr6:25849620	A	G	Height	EFO_0004339	GIANT	25282103	European	2014	0.018	0.0029	4.7e-10	+	253023	0	253023	79	Z-score	GIANT_Height_EUR_2014
rs942379	chr6:25849620	A	G	Bicuspid aortic valve	HP_0001647	Wooten	20098615	Unspecified	2010	NA	NA	4.02e-06	NA	898	-	-	-	-	GRASP
rs942379	chr6:25849620	A	G	Hemoglobin Hb	HP_0011902	van der Harst P	23222517	Mixed	2012	NA	NA	1.73e-07	NA	71861	-	-	-	-	GRASP
rs942379	chr6:25849620	A	G	Mean corpuscular hemoglobin concentration	EFO_0004528	van der Harst P	23222517	Mixed	2012	NA	NA	1.47e-09	NA	71861	-	-	-	-	GRASP
rs942379	chr6:25849620	A	G	Mean corpuscular volume	EFO_0004526	van der Harst P	23222517	Mixed	2012	NA	NA	4.23e-09	NA	71861	-	-	-	-	GRASP
rs942379	chr6:25849620	A	G	Uric acid females	NCIT_C62652;CHEBI_27226	Kolz M	19503597	European	2009	NA	NA	1.01e-07	NA	28141	-	-	-	-	GRASP
rs942379	chr6:25849620	A	G	Uric acid males	NCIT_C62652;CHEBI_27226	Kolz M	19503597	European	2009	NA	NA	2.24e-08	NA	28141	-	-	-	-	GRASP
rs942379	chr6:25849620	A	G	Arm fat-free mass left	-	Neale B	UKBB	European	2017	0.00967	0.001553	4.712e-10	+	331159	0	331159	1	IVNT	Neale-B_UKBB_EUR_2017
rs942379	chr6:25849620	A	G	Arm fat-free mass right	-	Neale B	UKBB	European	2017	0.009827	0.001522	1.063e-10	+	331221	0	331221	1	IVNT	Neale-B_UKBB_EUR_2017
rs942379	chr6:25849620	A	G	Arm predicted mass right	-	Neale B	UKBB	European	2017	0.009985	0.001516	4.551e-11	+	331216	0	331216	1	IVNT	Neale-B_UKBB_EUR_2017
rs942379	chr6:25849620	A	G	Basal metabolic rate	EFO_0007777	Neale B	UKBB	European	2017	0.009607	0.001619	2.973e-09	+	331307	0	331307	1	IVNT	Neale-B_UKBB_EUR_2017
rs942379	chr6:25849620	A	G	Comparative height size at age 10	-	Neale B	UKBB	European	2017	0.008143	0.001667	1.036e-06	+	332021	0	332021	1	-	Neale-B_UKBB_EUR_2017
rs942379	chr6:25849620	A	G	Height	EFO_0004339	Neale B	UKBB	European	2017	0.0148	0.001735	1.469e-17	+	336474	0	336474	1	IVNT	Neale-B_UKBB_EUR_2017
rs942379	chr6:25849620	A	G	Leg fat-free mass left	-	Neale B	UKBB	European	2017	0.007586	0.001608	2.385e-06	+	331258	0	331258	1	IVNT	Neale-B_UKBB_EUR_2017
rs942379	chr6:25849620	A	G	Leg fat-free mass right	-	Neale B	UKBB	European	2017	0.007711	0.001607	1.61e-06	+	331285	0	331285	1	IVNT	Neale-B_UKBB_EUR_2017
rs942379	chr6:25849620	A	G	Leg predicted mass left	-	Neale B	UKBB	European	2017	0.007592	0.001597	1.999e-06	+	331253	0	331253	1	IVNT	Neale-B_UKBB_EUR_2017
rs942379	chr6:25849620	A	G	Leg predicted mass right	-	Neale B	UKBB	European	2017	0.007766	0.001597	1.155e-06	+	331285	0	331285	1	IVNT	Neale-B_UKBB_EUR_2017
rs942379	chr6:25849620	A	G	Self-reported hereditary or genetic haematological disorder	EFO_0005803	Neale B	UKBB	European	2017	-0.0003904	7.185e-05	5.506e-08	-	337159	290	336869	1	risk diff	Neale-B_UKBB_EUR_2017
rs942379	chr6:25849620	A	G	Self-reported malabsorption or coeliac disease	EFO_0001060	Neale B	UKBB	European	2017	-0.001414	0.0001604	1.199e-18	-	337159	1452	335707	1	risk diff	Neale-B_UKBB_EUR_2017
rs942379	chr6:25849620	A	G	Treatment with allopurinol	EFO_0007056	Neale B	UKBB	European	2017	-0.001632	0.0002581	2.545e-10	-	337159	3819	333340	1	risk diff	Neale-B_UKBB_EUR_2017
rs942379	chr6:25849620	A	G	Trunk fat-free mass	-	Neale B	UKBB	European	2017	0.01025	0.001538	2.653e-11	+	331030	0	331030	1	IVNT	Neale-B_UKBB_EUR_2017
rs942379	chr6:25849620	A	G	Trunk predicted mass	-	Neale B	UKBB	European	2017	0.01023	0.001533	2.509e-11	+	330995	0	330995	1	IVNT	Neale-B_UKBB_EUR_2017
rs942379	chr6:25849620	A	G	Whole body fat-free mass	-	Neale B	UKBB	European	2017	0.009373	0.001544	1.284e-09	+	331291	0	331291	1	IVNT	Neale-B_UKBB_EUR_2017
rs942379	chr6:25849620	A	G	Whole body water mass	-	Neale B	UKBB	European	2017	0.009584	0.001546	5.751e-10	+	331315	0	331315	1	IVNT	Neale-B_UKBB_EUR_2017
rs71456318	chr11:64332862	A	C	Self-reported gout	EFO_0004274	Neale B	UKBB	European	2017	0.002663	0.0002888	2.969e-20	+	337159	4807	332352	1	risk diff	Neale-B_UKBB_EUR_2017
rs71456318	chr11:64332862	A	C	Treatment with allopurinol	EFO_0007056	Neale B	UKBB	European	2017	0.001874	0.0002581	3.818e-13	+	337159	3819	333340	1	risk diff	Neale-B_UKBB_EUR_2017
rs11231825	chr11:64360274	C	T	Serum urate	NCIT_C64814	GUGC	23263486	European	2012	NA	NA	1.25e-25	NA	69374	-	-	-	-	GRASP
rs11231825	chr11:64360274	C	T	Serum urate	EFO_0004531	GUGC	23263486	European	2012	-0.069	0.0062	1.254e-25	-	97305	0	97305	48	mg/dl	GUGC_Urate_EUR_2012
rs11231825	chr11:64360274	C	T	Leg fat percentage left	-	Neale B	UKBB	European	2017	0.008048	0.001675	1.553e-06	+	331278	0	331278	1	IVNT	Neale-B_UKBB_EUR_2017
rs11231825	chr11:64360274	C	T	Leg fat percentage right	-	Neale B	UKBB	European	2017	0.008192	0.001697	1.377e-06	+	331296	0	331296	1	IVNT	Neale-B_UKBB_EUR_2017
rs11231825	chr11:64360274	C	T	Self-reported gout	EFO_0004274	Neale B	UKBB	European	2017	-0.002931	0.0003166	2.103e-20	-	337159	4807	332352	1	risk diff	Neale-B_UKBB_EUR_2017
rs73225891	chr4:9922170	C	G	Other acute ischaemic heart diseases	EFO_0003777	Neale B	UKBB	European	2017	-0.001007	0.0002181	3.861e-06	-	337199	288	336911	1	risk diff	Neale-B_UKBB_EUR_2017
rs10821877	chr10:52603659	C	T	Serum urate	NCIT_C64814	GUGC	23263486	European	2012	NA	NA	2.98e-08	NA	69374	-	-	-	-	GRASP
rs10821877	chr10:52603659	C	T	Serum urate	EFO_0004531	GUGC	23263486	European	2012	-0.044	0.0075	2.983e-08	-	96976	0	96976	48	mg/dl	GUGC_Urate_EUR_2012
rs10821877	chr10:52603659	C	T	NKeff:%314-158a+; NK: (CD314-CD158a+)	OBA_VT1000783	Roederer M	25772697	European	2015	0.1056	0.02171	1.153e-06	+	426	0	426	1	-	Roederer-M_Immune-System_EUR_2015
rs10821877	chr10:52603659	C	T	mDC:%32+; mDC subset (CD32+)	OBA_VT1000783	Roederer M	25772697	European	2015	0.1021	0.02096	1.111e-06	+	425	0	425	1	-	Roederer-M_Immune-System_EUR_2015
rs116564150	chr4:89199397	A	G	Cause of death: diverticular disease of intestine, part unspecified, with perforation and abscess	-	Neale B	UKBB	European	2017	0.01327	0.002903	4.903e-06	+	7637	10	7627	1	risk diff	Neale-B_UKBB_EUR_2017
rs116564150	chr4:89199397	A	G	Self-reported gout	EFO_0004274	Neale B	UKBB	European	2017	0.008197	0.001409	5.936e-09	+	337159	4807	332352	1	risk diff	Neale-B_UKBB_EUR_2017
rs116564150	chr4:89199397	A	G	Treatment with allopurinol	EFO_0007056	Neale B	UKBB	European	2017	0.006895	0.001259	4.361e-08	+	337159	3819	333340	1	risk diff	Neale-B_UKBB_EUR_2017
rs2075570	chr1:155182164	T	C	Hematocrit	EFO_0004586	Astle W	27863252	European	2016	0.01984	0.003529	1.886e-08	+	173480	0	173480	2	IVNT	Astle-W_Blood-Cell-Traits_EUR_2016
rs2075570	chr1:155182164	T	C	Hemoglobin concentration	EFO_0004586	Astle W	27863252	European	2016	0.01657	0.003544	2.935e-06	+	173480	0	173480	2	IVNT	Astle-W_Blood-Cell-Traits_EUR_2016
rs2075570	chr1:155182164	T	C	Inflammatory bowel disease	EFO_0003767	IBDGC	26192919	European	2015	0.0809	0.0171	2.391e-06	+	34652	12882	21770	15	log OR	IBDGC_IBD_EUR_2015
rs2075570	chr1:155182164	T	C	Cancer pleiotropy	EFO_0001071;EFO_1000650;EFO_0005842;EFO_1001515;EFO_0001663;EFO_1001516;EFO_0000305;EFO_0001075;EFO_0000571;EFO_0000708	Fehringer G	27197191	European	2016	NA	NA	5e-06	NA	-	-	-	-	-	NHGRI-EBI_GWAS_Catalog
rs2075570	chr1:155182164	T	C	Impedance of leg right	-	Neale B	UKBB	European	2017	0.01027	0.002198	2.957e-06	+	331301	0	331301	1	IVNT	Neale-B_UKBB_EUR_2017
rs2075570	chr1:155182164	T	C	Mouth or teeth dental problems: dentures	-	Neale B	UKBB	European	2017	0.004405	0.000913	1.405e-06	+	336138	56894	279244	1	risk diff	Neale-B_UKBB_EUR_2017
rs3184504	chr12:111884608	C	T	Eosinophil count	EFO_0004586	Astle W	27863252	European	2016	-0.1017	0.003555	5.53e-180	-	173480	0	173480	2	IVNT	Astle-W_Blood-Cell-Traits_EUR_2016
rs3184504	chr12:111884608	C	T	Eosinophil percentage of granulocytes	EFO_0004586	Astle W	27863252	European	2016	-0.08497	0.003568	2.14e-125	-	173480	0	173480	2	IVNT	Astle-W_Blood-Cell-Traits_EUR_2016
rs3184504	chr12:111884608	C	T	Eosinophil percentage of white cells	EFO_0004586	Astle W	27863252	European	2016	-0.08255	0.003552	1.75e-119	-	173480	0	173480	2	IVNT	Astle-W_Blood-Cell-Traits_EUR_2016
rs3184504	chr12:111884608	C	T	Granulocyte count	EFO_0004586	Astle W	27863252	European	2016	-0.03387	0.00358	3.104e-21	-	173480	0	173480	2	IVNT	Astle-W_Blood-Cell-Traits_EUR_2016
rs3184504	chr12:111884608	C	T	High light scatter reticulocyte count	EFO_0004586	Astle W	27863252	European	2016	-0.06561	0.003575	3.164e-75	-	173480	0	173480	2	IVNT	Astle-W_Blood-Cell-Traits_EUR_2016
rs3184504	chr12:111884608	C	T	Immature fraction of reticulocytes	EFO_0004586	Astle W	27863252	European	2016	-0.03117	0.003541	1.35e-18	-	173480	0	173480	2	IVNT	Astle-W_Blood-Cell-Traits_EUR_2016
rs3184504	chr12:111884608	C	T	Lymphocyte percentage of white cells	EFO_0004586	Astle W	27863252	European	2016	-0.0406	0.003552	2.897e-30	-	173480	0	173480	2	IVNT	Astle-W_Blood-Cell-Traits_EUR_2016
rs3184504	chr12:111884608	C	T	Monocyte count	EFO_0004586	Astle W	27863252	European	2016	-0.0491	0.003563	3.25e-43	-	173480	0	173480	2	IVNT	Astle-W_Blood-Cell-Traits_EUR_2016
rs3184504	chr12:111884608	C	T	Myeloid white cell count	EFO_0004586	Astle W	27863252	European	2016	-0.03834	0.003589	1.221e-26	-	173480	0	173480	2	IVNT	Astle-W_Blood-Cell-Traits_EUR_2016
rs3184504	chr12:111884608	C	T	Neutrophil count	EFO_0004586	Astle W	27863252	European	2016	-0.02476	0.003571	4.126e-12	-	173480	0	173480	2	IVNT	Astle-W_Blood-Cell-Traits_EUR_2016
rs3184504	chr12:111884608	C	T	Neutrophil percentage of white cells	EFO_0004586	Astle W	27863252	European	2016	0.05022	0.003558	3.017e-45	+	173480	0	173480	2	IVNT	Astle-W_Blood-Cell-Traits_EUR_2016
rs3184504	chr12:111884608	C	T	Platelet distribution width	EFO_0004586	Astle W	27863252	European	2016	-0.01941	0.003581	5.954e-08	-	173480	0	173480	2	IVNT	Astle-W_Blood-Cell-Traits_EUR_2016
rs3184504	chr12:111884608	C	T	Plateletcrit	EFO_0004586	Astle W	27863252	European	2016	-0.1143	0.003644	4.76e-216	-	173480	0	173480	2	IVNT	Astle-W_Blood-Cell-Traits_EUR_2016
rs3184504	chr12:111884608	C	T	Red blood cell count	EFO_0004586	Astle W	27863252	European	2016	-0.04902	0.003547	1.921e-43	-	173480	0	173480	2	IVNT	Astle-W_Blood-Cell-Traits_EUR_2016
rs3184504	chr12:111884608	C	T	Sum basophil neutrophil counts	EFO_0004586	Astle W	27863252	European	2016	-0.02597	0.003577	3.896e-13	-	173480	0	173480	2	IVNT	Astle-W_Blood-Cell-Traits_EUR_2016
rs3184504	chr12:111884608	C	T	Sum neutrophil eosinophil counts	EFO_0004586	Astle W	27863252	European	2016	-0.03291	0.003575	3.367e-20	-	173480	0	173480	2	IVNT	Astle-W_Blood-Cell-Traits_EUR_2016
rs3184504	chr12:111884608	C	T	Diastolic blood pressure	EFO_0006336	BPExome	27618447	Mixed	2016	NA	NA	2.952e-20	NA	192763	0	192763	51	INVT	BPExome_DBP_Mixed_2016
rs3184504	chr12:111884608	C	T	Hypertension	EFO_0000537	BPExome	27618447	Mixed	2016	NA	NA	3.921e-10	NA	183273	92652	90621	51	log OR	BPExome_Hypertension_Mixed_2016
rs3184504	chr12:111884608	C	T	Systolic blood pressure	EFO_0006335	BPExome	27618447	Mixed	2016	NA	NA	5.122e-08	NA	192763	0	192763	51	INVT	BPExome_SBP_Mixed_2016
rs3184504	chr12:111884608	C	T	Coronary artery disease	EFO_0000378;EFO_0001645	CARDIoGRAMplusC4D	23202125	Mixed	2013	-0.06797	0.0101	1.8e-11	-	194427	63746	130681	48	log OR	CARDIoGRAMplusC4D_CHD_Mixed_2013
rs3184504	chr12:111884608	C	T	Coronary artery disease	EFO_0000378;EFO_0001645	CARDIoGRAMplusC4D	26343387	Mixed	2015	-0.06421	0.01052	1.03e-09	-	184305	60801	123504	48	log OR	CARDIoGRAMplusC4D_CHD_Mixed_2015
rs3184504	chr12:111884608	C	T	Myocardial infarction	EFO_0000612	CARDIoGRAMplusC4D	26343387	Mixed	2015	-0.07334	0.01166	3.185e-10	-	167181	43677	123504	48	log OR	CARDIoGRAMplusC4D_MI_Mixed_2015
rs3184504	chr12:111884608	C	T	log eGFR cystatin C	EFO_0005208	CKDGen	20383146	European	2010	NA	NA	1.1e-07	+	20957	0	20957	8	ml/min/1.73m2	CKDGen_eGFRcys_EUR_2010
rs3184504	chr12:111884608	C	T	log eGFR cystatin C	EFO_0005208	CKDGen	26831199	European	2016	0.012	0.0019	1.2e-09	+	33143	0	33143	16	ml/min/1.73m2	CKDGen_eGFRcys_EUR_2016
rs3184504	chr12:111884608	C	T	Allergic disease	EFO_0003785	Ferreira M	29083406	European	2017	0.0302	0.0057	1.262e-07	+	360838	180129	180709	13	log OR	Ferreira-M_Allergic-Disease_EUR_2017
rs3184504	chr12:111884608	C	T	Body mass index adjusted for smoking	EFO_0004340	GIANT	28443625	Mixed	2017	0.0162	0.0035	3.308e-06	+	215053	0	215053	79	IVNT	GIANT_BMI-adjusted-Smoking_Mixed_2017
rs3184504	chr12:111884608	C	T	Body mass index	EFO_0004340	GIANT	29273807	European	2018	0.014	0.0023	1.9e-09	+	449889	0	449889	112	IVNT	GIANT_BMI_EUR_2018
rs3184504	chr12:111884608	C	T	Body mass index	EFO_0004340	GIANT	25673413	Mixed	2015	0.0138	0.003	4.397e-06	+	335736	0	335736	125	IVNT	GIANT_BMI_Mixed_2015
rs3184504	chr12:111884608	C	T	Body mass index	EFO_0004340	GIANT	29273807	Mixed	2018	0.013	0.0022	1.6e-09	+	526508	0	526508	123	IVNT	GIANT_BMI_Mixed_2018
rs3184504	chr12:111884608	C	T	Hip circumference	EFO_0005093	GIANT	25673412	European	2015	0.017	0.0036	5.3e-06	+	211411	0	211411	101	IVNT	GIANT_Hip_EUR_2015
rs3184504	chr12:111884608	C	T	Hip circumference	EFO_0005093	GIANT	25673412	Mixed	2015	0.016	0.0036	5.7e-06	+	225437	0	225437	101	IVNT	GIANT_Hip_Mixed_2015
rs3184504	chr12:111884608	C	T	High density lipoprotein	EFO_0004612	GLGC	24097068	European	2013	0.0258	0.0036	4.097e-12	+	177710	0	177710	60	IVNT	GLGC_HDL_EUR_2013
rs3184504	chr12:111884608	C	T	High density lipoprotein	EFO_0004612	GLGC	20686565	Mixed	2010	0.0219	0.005	4.969e-06	+	99900	0	99900	46	Z-score	GLGC_HDL_Mixed_2010
rs3184504	chr12:111884608	C	T	Low density lipoprotein	EFO_0004611	GLGC	24097068	European	2013	0.0268	0.0038	4.203e-12	+	164996	0	164996	60	IVNT	GLGC_LDL_EUR_2013
rs3184504	chr12:111884608	C	T	Low density lipoprotein	EFO_0004611	GLGC	20686565	Mixed	2010	0.0306	0.0053	1.73e-09	+	95454	0	95454	46	Z-score	GLGC_LDL_Mixed_2010
rs3184504	chr12:111884608	C	T	Total cholesterol	EFO_0004574	GLGC	24097068	European	2013	0.0318	0.0037	1.623e-17	+	177714	0	177714	60	IVNT	GLGC_TC_EUR_2013
rs3184504	chr12:111884608	C	T	Total cholesterol	EFO_0004574	GLGC	20686565	Mixed	2010	0.0331	0.0052	2.686e-11	+	100184	0	100184	46	Z-score	GLGC_TC_Mixed_2010
rs3184504	chr12:111884608	C	T	Celiac disease	EFO_0001060	Hunt KA	18311140	European	2008	NA	NA	1.33e-07	NA	2189	-	-	-	-	GRASP
rs3184504	chr12:111884608	C	T	Celiac disease	EFO_0001060	Zhernakova A	21383967	European	2011	NA	NA	1.23e-12	NA	38053	-	-	-	-	GRASP
rs3184504	chr12:111884608	C	T	Celiac disease	EFO_0001060	Trynka	22057235	Mixed	2011	NA	NA	5.4e-21	NA	24269	-	-	-	-	GRASP
rs3184504	chr12:111884608	C	T	Coronary artery disease	EFO_0000378	Soranzo N	19820697	European	2009	NA	NA	4.23e-11	NA	4627	-	-	-	-	GRASP
rs3184504	chr12:111884608	C	T	Coronary artery disease	EFO_0000378	CARDIoGRAMplusC4D	23202125	Mixed	2013	NA	NA	1.74e-11	NA	194427	-	-	-	-	GRASP
rs3184504	chr12:111884608	C	T	Coronary artery disease age 50	EFO_0000378	CARDIoGRAMplusC4D	23202125	Mixed	2013	NA	NA	1.58e-10	NA	194427	-	-	-	-	GRASP
rs3184504	chr12:111884608	C	T	Coronary artery disease males	EFO_0000378	CARDIoGRAMplusC4D	23202125	Mixed	2013	NA	NA	3.23e-06	NA	194427	-	-	-	-	GRASP
rs3184504	chr12:111884608	C	T	Cystatin C in serum	NCIT_C88224;CMO_0002779	CKDGen	20383146	European	2010	NA	NA	3.1e-08	NA	67093	-	-	-	-	GRASP
rs3184504	chr12:111884608	C	T	Diastolic blood pressure	EFO_0006336	Levy D	19430479	European	2009	NA	NA	2.58e-14	NA	29136	-	-	-	-	GRASP
rs3184504	chr12:111884608	C	T	Diastolic blood pressure	EFO_0006336	Fox	21378095	African	2011	NA	NA	2.58e-14	NA	7473	-	-	-	-	GRASP
rs3184504	chr12:111884608	C	T	Diastolic blood pressure	EFO_0006336	ICBP	21909115	European	2011	NA	NA	3.6e-25	NA	69395	-	-	-	-	GRASP
rs3184504	chr12:111884608	C	T	Diastolic blood pressure	EFO_0006336	CARDIoGRAMplusC4D	23202125	Mixed	2013	NA	NA	2.33e-14	NA	194427	-	-	-	-	GRASP
rs3184504	chr12:111884608	C	T	Eosinophil count	EFO_0004842	Gudbjartsson DF	19198610	Mixed	2009	NA	NA	2.1e-16	NA	9392	-	-	-	-	GRASP
rs3184504	chr12:111884608	C	T	Generalized vitiligo	NCIT_C26915	Jin Y	22561518	European	2012	NA	NA	2.46e-17	NA	3228	-	-	-	-	GRASP
rs3184504	chr12:111884608	C	T	HDL cholesterol	NCIT_C61041;NCIT_C105587	GLGC	20686565	Mixed	2010	NA	NA	4.969e-06	NA	100184	-	-	-	-	GRASP
rs3184504	chr12:111884608	C	T	HDL cholesterol	NCIT_C61041;NCIT_C105587	CARDIoGRAMplusC4D	23202125	Mixed	2013	NA	NA	4.97e-06	NA	194427	-	-	-	-	GRASP
rs3184504	chr12:111884608	C	T	Hematocrit Hct	EFO_0004348	Ganesh SK	19862010	European	2009	NA	NA	3.67e-09	NA	24167	-	-	-	-	GRASP
rs3184504	chr12:111884608	C	T	Hematocrit Hct	EFO_0004348	Lo	21153663	Mixed	2010	NA	NA	1.5e-06	NA	30551	-	-	-	-	GRASP
rs3184504	chr12:111884608	C	T	Hemoglobin Hb	HP_0011902	Ganesh SK	19862010	European	2009	NA	NA	3.98e-08	NA	24167	-	-	-	-	GRASP
rs3184504	chr12:111884608	C	T	Hemoglobin Hb	HP_0011902	Lo	21153663	Mixed	2010	NA	NA	3.2e-07	NA	30551	-	-	-	-	GRASP
rs3184504	chr12:111884608	C	T	Hemoglobin Hb	HP_0011902	Gieger C	22139419	European	2011	NA	NA	2.42e-19	NA	18600	-	-	-	-	GRASP
rs3184504	chr12:111884608	C	T	Hemoglobin Hb	HP_0011902	van der Harst P	23222517	Mixed	2012	NA	NA	4.3e-19	NA	71861	-	-	-	-	GRASP
rs3184504	chr12:111884608	C	T	Hypertension	EFO_0000537	Lettre G	21347282	African	2011	NA	NA	3e-14	NA	8090	-	-	-	-	GRASP
rs3184504	chr12:111884608	C	T	Hypertension	EFO_0000537	ICBP	21909115	European	2011	NA	NA	2.6e-06	NA	69395	-	-	-	-	GRASP
rs3184504	chr12:111884608	C	T	Hypothyroidism	EFO_0004705	Eriksson N	22493691	European	2012	NA	NA	2.6e-12	NA	39282	-	-	-	-	GRASP
rs3184504	chr12:111884608	C	T	Juvenile idiopathic arthritis including oligoarticular and rheumatoid factor negative polyarticular JIA	-	Hinks	23603761	European	2013	NA	NA	2.6e-09	NA	15872	-	-	-	-	GRASP
rs3184504	chr12:111884608	C	T	LDL cholesterol	EFO_0004195	Talmud	19913121	European	2009	NA	NA	2.17e-06	NA	5059	-	-	-	-	GRASP
rs3184504	chr12:111884608	C	T	LDL cholesterol	EFO_0004195	GLGC	20686565	Mixed	2010	NA	NA	1.73e-09	NA	100184	-	-	-	-	GRASP
rs3184504	chr12:111884608	C	T	LDL cholesterol	EFO_0004195	Asselbergs	23063622	European	2012	NA	NA	1.3e-11	NA	66240	-	-	-	-	GRASP
rs3184504	chr12:111884608	C	T	LDL cholesterol	EFO_0004195	CARDIoGRAMplusC4D	23202125	Mixed	2013	NA	NA	1.73e-09	NA	194427	-	-	-	-	GRASP
rs3184504	chr12:111884608	C	T	Lymphocyte count	EFO_0004587	Gudbjartsson DF	19198610	Mixed	2009	NA	NA	1.1e-08	NA	9392	-	-	-	-	GRASP
rs3184504	chr12:111884608	C	T	Mean arterial pressure	EFO_0006340	Wain LV	21909110	European	2011	NA	NA	3.64e-18	NA	74064	-	-	-	-	GRASP
rs3184504	chr12:111884608	C	T	Myocardial infarction	EFO_0000612	Soranzo N	19820697	European	2009	NA	NA	5.04e-11	NA	4627	-	-	-	-	GRASP
rs3184504	chr12:111884608	C	T	Myocardial infarction	EFO_0000612	CARDIoGRAM	21378990	European	2011	NA	NA	1.17e-06	NA	86995	-	-	-	-	GRASP
rs3184504	chr12:111884608	C	T	Plasma Beta 2 microglobulin levels	NCIT_C62657;NCIT_C81980	Tin A	23417110	European	2013	NA	NA	3.11e-08	NA	6728	-	-	-	-	GRASP
rs3184504	chr12:111884608	C	T	Platelet count PLT	EFO_0004309	Gudbjartsson DF	19198610	Mixed	2009	NA	NA	3e-11	NA	9392	-	-	-	-	GRASP
rs3184504	chr12:111884608	C	T	Platelet count PLT	EFO_0004309	Soranzo N	19820697	European	2009	NA	NA	1.6e-08	NA	4627	-	-	-	-	GRASP
rs3184504	chr12:111884608	C	T	Platelet count PLT	EFO_0004309	Gieger C	22139419	European	2011	NA	NA	1.22e-26	NA	18600	-	-	-	-	GRASP
rs3184504	chr12:111884608	C	T	Primary biliary cirrhosis	EFO_1001486	Liu	22961000	European	2012	NA	NA	1.106e-08	NA	11375	-	-	-	-	GRASP
rs3184504	chr12:111884608	C	T	Primary sclerosing cholangitis	EFO_0004268	Liu	23603763	European	2013	NA	NA	5.91e-11	NA	28868	-	-	-	-	GRASP
rs3184504	chr12:111884608	C	T	Red blood cell count RBC	EFO_0004305	Gieger C	22139419	European	2011	NA	NA	2.96e-13	NA	18600	-	-	-	-	GRASP
rs3184504	chr12:111884608	C	T	Red blood cell count RBC	EFO_0004305	van der Harst P	23222517	Mixed	2012	NA	NA	1.79e-12	NA	71861	-	-	-	-	GRASP
rs3184504	chr12:111884608	C	T	Retinal venular caliber	-	Ikram MK	21060863	European	2010	NA	NA	4.88e-11	NA	15358	-	-	-	-	GRASP
rs3184504	chr12:111884608	C	T	Rheumatoid arthritis and celiac disease	EFO_0001060;EFO_0000685	Zhernakova A	21383967	European	2011	NA	NA	1.4e-11	NA	38053	-	-	-	-	GRASP
rs3184504	chr12:111884608	C	T	Rheumatoid factor negative polyarticular juvenile idiopathic arthritis	EFO_1002020	Hinks	23603761	European	2013	NA	NA	3.96e-07	NA	15872	-	-	-	-	GRASP
rs3184504	chr12:111884608	C	T	Selective immunoglobulin A deficiency IgAD	EFO_1001929	Ferreira RC	20694011	European	2010	NA	NA	5.6e-31	NA	1520	-	-	-	-	GRASP
rs3184504	chr12:111884608	C	T	Serum urate	NCIT_C64814	GUGC	23263486	European	2012	NA	NA	2.6e-10	NA	69374	-	-	-	-	GRASP
rs3184504	chr12:111884608	C	T	Soluble intercellular adhesion molecule 1 ICAM 1	EFO_0004520	Pare G	21533024	European	2011	NA	NA	2.9e-17	NA	22435	-	-	-	-	GRASP
rs3184504	chr12:111884608	C	T	Systolic blood pressure	EFO_0006335	Levy D	19430479	European	2009	NA	NA	4.52e-09	NA	29136	-	-	-	-	GRASP
rs3184504	chr12:111884608	C	T	Systolic blood pressure	EFO_0006335	Fox	21378095	African	2011	NA	NA	4.52e-09	NA	7473	-	-	-	-	GRASP
rs3184504	chr12:111884608	C	T	Systolic blood pressure	EFO_0006335	ICBP	21909115	European	2011	NA	NA	3.8e-18	NA	69395	-	-	-	-	GRASP
rs3184504	chr12:111884608	C	T	Systolic blood pressure	EFO_0006335	CARDIoGRAMplusC4D	23202125	Mixed	2013	NA	NA	1.69e-09	NA	194427	-	-	-	-	GRASP
rs3184504	chr12:111884608	C	T	Systolic blood pressure and diastolic blood pressure	EFO_0006335	Ganesh SK	19862010	European	2009	NA	NA	1.7e-08	NA	24167	-	-	-	-	GRASP
rs3184504	chr12:111884608	C	T	Tetrology of fallot	HP_0001636	Cordell HJ	23297363	European	2013	NA	NA	1.48e-07	NA	5994	-	-	-	-	GRASP
rs3184504	chr12:111884608	C	T	Total cholesterol	NCIT_C61032;NCIT_C105586	GLGC	20686565	Mixed	2010	NA	NA	2.686e-11	NA	100184	-	-	-	-	GRASP
rs3184504	chr12:111884608	C	T	Total cholesterol	NCIT_C61032;NCIT_C105586	Asselbergs	23063622	European	2012	NA	NA	2.14e-11	NA	66240	-	-	-	-	GRASP
rs3184504	chr12:111884608	C	T	Total cholesterol	NCIT_C61032;NCIT_C105586	CARDIoGRAMplusC4D	23202125	Mixed	2013	NA	NA	2.69e-11	NA	194427	-	-	-	-	GRASP
rs3184504	chr12:111884608	C	T	Type 1 diabetes	EFO_0001359	Barrett JC	19430480	European	2009	NA	NA	2.8e-27	NA	16559	-	-	-	-	GRASP
rs3184504	chr12:111884608	C	T	Type 1 diabetes	EFO_0001359	Plagnol V	21829393	Mixed	2011	NA	NA	2e-38	NA	12501	-	-	-	-	GRASP
rs3184504	chr12:111884608	C	T	Type 1 diabetes	EFO_0001359	Bradfield JP	21980299	European	2011	NA	NA	1.77e-21	NA	26890	-	-	-	-	GRASP
rs3184504	chr12:111884608	C	T	Serum urate	EFO_0004531	GUGC	23263486	European	2012	-0.036	0.0054	2.6e-10	-	110202	0	110202	48	mg/dl	GUGC_Urate_EUR_2012
rs3184504	chr12:111884608	C	T	Coronary artery disease	EFO_0000378;EFO_0001645	Howson JMM	28530674	European	2017	-0.0511	0.0087	3.71e-09	-	186802	-	-	-	log OR	Howson-JMM_CHD_EUR_2017
rs3184504	chr12:111884608	C	T	Diastolic blood pressure	EFO_0006336	ICBP	21909115	European	2011	NA	NA	2.33e-14	NA	69395	0	69395	29	mmHg	ICBP_DBP_EUR_2011
rs3184504	chr12:111884608	C	T	Systolic blood pressure	EFO_0006335	ICBP	21909115	European	2011	NA	NA	1.69e-09	NA	69395	0	69395	29	mmHg	ICBP_SBP_EUR_2011
rs3184504	chr12:111884608	C	T	Primary sclerosing cholangitis	EFO_0004268	Ji S	27992413	European	2017	-0.1865	0.03	5.047e-10	-	14890	2871	12019	3	log OR	Ji-S_PSC_EUR_2017
rs3184504	chr12:111884608	C	T	HbA1c	EFO_0004541;EFO_0001360	MAGIC	28898252	European	2017	0.008	0.0016	2.596e-07	+	123665	0	123665	50	%	MAGIC_HbA1c_EUR_2017
rs3184504	chr12:111884608	C	T	Beta 2 microglubulin plasma levels	EFO_0005197	Tin A	23417110	European	2013	0.02	0.003609	3e-08	+	-	-	-	-	unit decrease	NHGRI-EBI_GWAS_Catalog
rs3184504	chr12:111884608	C	T	Cancer	EFO_0001071;EFO_1000650;EFO_0005842;EFO_1001515;EFO_0001663;EFO_1001516;EFO_0000305;EFO_0001075;EFO_0000571;EFO_0000708	Fehringer G	27197191	European	2016	0.09531	0.02005	2e-06	+	-	-	-	-	log OR	NHGRI-EBI_GWAS_Catalog
rs3184504	chr12:111884608	C	T	Cancer pleiotropy	EFO_0001071;EFO_1000650;EFO_0005842;EFO_1001515;EFO_0001663;EFO_1001516;EFO_0000305;EFO_0001075;EFO_0000571;EFO_0000708	Fehringer G	27197191	European	2016	NA	NA	1e-06	NA	-	-	-	-	-	NHGRI-EBI_GWAS_Catalog
rs3184504	chr12:111884608	C	T	Colorectal cancer	EFO_0005842	Schumacher FR	26151821	Mixed	2015	0.08618	0.01536	2e-08	+	-	-	-	-	log OR	NHGRI-EBI_GWAS_Catalog
rs3184504	chr12:111884608	C	T	Coronary artery disease	EFO_0000378	CARDIoGRAMplusC4D	26343387	Mixed	2015	-0.06766	0.01107	1e-09	-	-	-	-	-	log OR	NHGRI-EBI_GWAS_Catalog
rs3184504	chr12:111884608	C	T	Diastolic blood pressure	EFO_0006336	Levy D	19430479	European	2009	-0.48	0.06317	3e-14	-	-	-	-	-	mmHg increase	NHGRI-EBI_GWAS_Catalog
rs3184504	chr12:111884608	C	T	Diastolic blood pressure	EFO_0006336	ICBP	21909115	European	2011	-0.448	0.04327	4e-25	-	-	-	-	-	mmHg increase	NHGRI-EBI_GWAS_Catalog
rs3184504	chr12:111884608	C	T	Diastolic blood pressure	EFO_0006336	Kato N	26390057	Mixed	2015	-0.5387	0.08468	2e-10	-	-	-	-	-	mmHg increase	NHGRI-EBI_GWAS_Catalog
rs3184504	chr12:111884608	C	T	Diastolic blood pressure	EFO_0006336	Wain LV	28739976	European	2017	0.457	0.04498	3e-24	+	-	-	-	-	unit decrease	NHGRI-EBI_GWAS_Catalog
rs3184504	chr12:111884608	C	T	Fibrinogen levels	EFO_0004623	de Vries PS	28107422	European	2017	NA	NA	1e-10	NA	-	-	-	-	unit increase	NHGRI-EBI_GWAS_Catalog
rs3184504	chr12:111884608	C	T	Granulocyte count	EFO_0007987	Astle W	27863252	European	2016	0.03387	0.003579	3e-21	+	-	-	-	-	unit decrease	NHGRI-EBI_GWAS_Catalog
rs3184504	chr12:111884608	C	T	Hemoglobin concentration	EFO_0004509	Astle W	27863252	European	2016	0.0647	0.003538	1e-74	+	-	-	-	-	unit decrease	NHGRI-EBI_GWAS_Catalog
rs3184504	chr12:111884608	C	T	Hemoglobin levels	EFO_0004509	van Rooij FJA	28017375	Mixed	2016	NA	NA	1e-10	NA	-	-	-	-	-	NHGRI-EBI_GWAS_Catalog
rs3184504	chr12:111884608	C	T	Hypothyroidism	EFO_0004705	Eriksson N	22493691	European	2012	-0.1823	0.02613	3e-12	-	-	-	-	-	log OR	NHGRI-EBI_GWAS_Catalog
rs3184504	chr12:111884608	C	T	Inflammatory bowel disease	EFO_0003767	IBDGC	26192919	European	2015	NA	NA	1e-09	NA	-	-	-	-	-	NHGRI-EBI_GWAS_Catalog
rs3184504	chr12:111884608	C	T	Myeloid white cell count	EFO_0007988	Astle W	27863252	European	2016	0.03834	0.003583	1e-26	+	-	-	-	-	unit decrease	NHGRI-EBI_GWAS_Catalog
rs3184504	chr12:111884608	C	T	Neutrophil count	EFO_0004833	Astle W	27863252	European	2016	0.02476	0.003569	4e-12	+	-	-	-	-	unit decrease	NHGRI-EBI_GWAS_Catalog
rs3184504	chr12:111884608	C	T	Platelet counts	-	Gieger C	22139419	European	2011	-3.99	0.3728	1e-26	-	-	-	-	-	10^9/l increase	NHGRI-EBI_GWAS_Catalog
rs3184504	chr12:111884608	C	T	Primary sclerosing cholangitis	EFO_0004268	Ji S	27992413	European	2017	-0.1655	0.02281	4e-13	-	-	-	-	-	log OR	NHGRI-EBI_GWAS_Catalog
rs3184504	chr12:111884608	C	T	Red blood cell count	EFO_0004305	Astle W	27863252	European	2016	0.04902	0.003548	2e-43	+	-	-	-	-	unit decrease	NHGRI-EBI_GWAS_Catalog
rs3184504	chr12:111884608	C	T	Red blood cell traits	EFO_0004527	van der Harst P	23222517	Mixed	2012	-0.051	0.005707	4e-19	-	-	-	-	-	unit increase	NHGRI-EBI_GWAS_Catalog
rs3184504	chr12:111884608	C	T	Sum basophil neutrophil counts	EFO_0004833;EFO_0005090	Astle W	27863252	European	2016	0.02597	0.003579	4e-13	+	-	-	-	-	unit decrease	NHGRI-EBI_GWAS_Catalog
rs3184504	chr12:111884608	C	T	Sum neutrophil eosinophil counts	EFO_0004833;EFO_0004842	Astle W	27863252	European	2016	0.03291	0.00357	3e-20	+	-	-	-	-	unit decrease	NHGRI-EBI_GWAS_Catalog
rs3184504	chr12:111884608	C	T	Systolic blood pressure	EFO_0006335	Wain LV	28739976	European	2017	0.629	0.07405	2e-17	+	-	-	-	-	unit decrease	NHGRI-EBI_GWAS_Catalog
rs3184504	chr12:111884608	C	T	Tonsillectomy	EFO_0007924	Pickrell JK	27182965	European	2016	NA	NA	3e-10	NA	-	-	-	-	-	NHGRI-EBI_GWAS_Catalog
rs3184504	chr12:111884608	C	T	Tonsillectomy	EFO_0007924	Tian C	28928442	European	2017	-0.04879	0.007746	3e-10	-	-	-	-	-	log OR	NHGRI-EBI_GWAS_Catalog
rs3184504	chr12:111884608	C	T	Type 1 diabetes	EFO_0001359	Barrett JC	19430480	European	2009	NA	NA	3e-27	NA	-	-	-	-	-	NHGRI-EBI_GWAS_Catalog
rs3184504	chr12:111884608	C	T	Type 1 diabetes autoantibodies	-	Plagnol V	21829393	Mixed	2011	NA	NA	2e-38	NA	-	-	-	-	-	NHGRI-EBI_GWAS_Catalog
rs3184504	chr12:111884608	C	T	White blood cell count eosinophil	EFO_0004842	Jain D	28158719	Hispanic	2017	-0.068	0.01431	2e-06	-	-	-	-	-	unit increase	NHGRI-EBI_GWAS_Catalog
rs3184504	chr12:111884608	C	T	Acute myocardial infarction	EFO_1000883	Neale B	UKBB	European	2017	-0.00159	0.0002608	1.086e-09	-	337199	3927	333272	1	risk diff	Neale-B_UKBB_EUR_2017
rs3184504	chr12:111884608	C	T	Arm fat-free mass left	-	Neale B	UKBB	European	2017	0.01534	0.001545	2.994e-23	+	331159	0	331159	1	IVNT	Neale-B_UKBB_EUR_2017
rs3184504	chr12:111884608	C	T	Arm fat-free mass right	-	Neale B	UKBB	European	2017	0.0148	0.001514	1.417e-22	+	331221	0	331221	1	IVNT	Neale-B_UKBB_EUR_2017
rs3184504	chr12:111884608	C	T	Arm predicted mass right	-	Neale B	UKBB	European	2017	0.0146	0.001508	3.629e-22	+	331216	0	331216	1	IVNT	Neale-B_UKBB_EUR_2017
rs3184504	chr12:111884608	C	T	Basal metabolic rate	EFO_0007777	Neale B	UKBB	European	2017	0.01455	0.001611	1.731e-19	+	331307	0	331307	1	IVNT	Neale-B_UKBB_EUR_2017
rs3184504	chr12:111884608	C	T	Birth weight	EFO_0004344	Neale B	UKBB	European	2017	0.02979	0.003164	4.817e-21	+	193063	0	193063	1	IVNT	Neale-B_UKBB_EUR_2017
rs3184504	chr12:111884608	C	T	Birth weight of first child	EFO_0004344	Neale B	UKBB	European	2017	0.04104	0.004443	2.542e-20	+	145558	0	145558	1	-	Neale-B_UKBB_EUR_2017
rs3184504	chr12:111884608	C	T	Blood clot in the leg	-	Neale B	UKBB	European	2017	-0.001568	0.0003457	5.703e-06	-	336782	6905	329877	1	risk diff	Neale-B_UKBB_EUR_2017
rs3184504	chr12:111884608	C	T	Chronic ischaemic heart disease	EFO_0001645	Neale B	UKBB	European	2017	-0.001992	0.0003854	2.352e-07	-	337199	8755	328444	1	risk diff	Neale-B_UKBB_EUR_2017
rs3184504	chr12:111884608	C	T	Comparative height size at age 10	-	Neale B	UKBB	European	2017	0.01248	0.001659	5.243e-14	+	332021	0	332021	1	-	Neale-B_UKBB_EUR_2017
rs3184504	chr12:111884608	C	T	Diastolic blood pressure	EFO_0006336	Neale B	UKBB	European	2017	-0.03826	0.002461	1.738e-54	-	317756	0	317756	1	IVNT	Neale-B_UKBB_EUR_2017
rs3184504	chr12:111884608	C	T	Ever smoked	EFO_0006527	Neale B	UKBB	European	2017	-0.006103	0.001189	2.879e-07	-	336067	202585	133482	1	risk diff	Neale-B_UKBB_EUR_2017
rs3184504	chr12:111884608	C	T	Hayfever, allergic rhinitis or eczema	EFO_0003956;EFO_0005854;EFO_0000274	Neale B	UKBB	European	2017	0.00809	0.001027	3.37e-15	+	336782	77891	258891	1	risk diff	Neale-B_UKBB_EUR_2017
rs3184504	chr12:111884608	C	T	Height	EFO_0004339	Neale B	UKBB	European	2017	0.01108	0.001727	1.387e-10	+	336474	0	336474	1	IVNT	Neale-B_UKBB_EUR_2017
rs3184504	chr12:111884608	C	T	Hip circumference	EFO_0005093	Neale B	UKBB	European	2017	0.01555	0.002406	1.038e-10	+	336601	0	336601	1	IVNT	Neale-B_UKBB_EUR_2017
rs3184504	chr12:111884608	C	T	Illnesses of father: heart disease	EFO_0003777	Neale B	UKBB	European	2017	-0.007073	0.001214	5.67e-09	-	298237	97385	200852	1	risk diff	Neale-B_UKBB_EUR_2017
rs3184504	chr12:111884608	C	T	Illnesses of father: none of the above, group 1	-	Neale B	UKBB	European	2017	0.006513	0.001261	2.388e-07	+	294791	109206	185585	1	risk diff	Neale-B_UKBB_EUR_2017
rs3184504	chr12:111884608	C	T	Illnesses of siblings: high blood pressure	EFO_0004325	Neale B	UKBB	European	2017	-0.007026	0.001108	2.312e-10	-	262361	54270	208091	1	risk diff	Neale-B_UKBB_EUR_2017
rs3184504	chr12:111884608	C	T	Illnesses of siblings: none of the above, group 1	-	Neale B	UKBB	European	2017	0.009025	0.001299	3.686e-12	+	262734	178376	84358	1	risk diff	Neale-B_UKBB_EUR_2017
rs3184504	chr12:111884608	C	T	Impedance of arm right	-	Neale B	UKBB	European	2017	-0.01371	0.001709	1.005e-15	-	331279	0	331279	1	IVNT	Neale-B_UKBB_EUR_2017
rs3184504	chr12:111884608	C	T	Impedance of leg left	-	Neale B	UKBB	European	2017	-0.01042	0.002215	2.531e-06	-	331296	0	331296	1	IVNT	Neale-B_UKBB_EUR_2017
rs3184504	chr12:111884608	C	T	Impedance of leg right	-	Neale B	UKBB	European	2017	-0.01198	0.002198	4.994e-08	-	331301	0	331301	1	IVNT	Neale-B_UKBB_EUR_2017
rs3184504	chr12:111884608	C	T	Impedance of whole body	-	Neale B	UKBB	European	2017	-0.0142	0.001853	1.777e-14	-	331284	0	331284	1	IVNT	Neale-B_UKBB_EUR_2017
rs3184504	chr12:111884608	C	T	Leg fat-free mass left	-	Neale B	UKBB	European	2017	0.01206	0.0016	4.685e-14	+	331258	0	331258	1	IVNT	Neale-B_UKBB_EUR_2017
rs3184504	chr12:111884608	C	T	Leg fat-free mass right	-	Neale B	UKBB	European	2017	0.01267	0.001599	2.321e-15	+	331285	0	331285	1	IVNT	Neale-B_UKBB_EUR_2017
rs3184504	chr12:111884608	C	T	Leg predicted mass right	-	Neale B	UKBB	European	2017	0.01262	0.001589	1.984e-15	+	331285	0	331285	1	IVNT	Neale-B_UKBB_EUR_2017
rs3184504	chr12:111884608	C	T	Long-standing illness, disability or infirmity	-	Neale B	UKBB	European	2017	-0.005914	0.001153	2.878e-07	-	329663	107123	222540	1	risk diff	Neale-B_UKBB_EUR_2017
rs3184504	chr12:111884608	C	T	Mean time to correctly identify matches	-	Neale B	UKBB	European	2017	-0.01316	0.002401	4.23e-08	-	335139	0	335139	1	IVNT	Neale-B_UKBB_EUR_2017
rs3184504	chr12:111884608	C	T	Medication for cholesterol, blood pressure or diabetes: blood pressure medication	EFO_0007056	Neale B	UKBB	European	2017	-0.01372	0.001559	1.358e-18	-	154702	38548	116154	1	risk diff	Neale-B_UKBB_EUR_2017
rs3184504	chr12:111884608	C	T	Medication for cholesterol, blood pressure or diabetes: none of the above	EFO_0007056	Neale B	UKBB	European	2017	0.01095	0.0017	1.214e-10	+	154702	103004	51698	1	risk diff	Neale-B_UKBB_EUR_2017
rs3184504	chr12:111884608	C	T	Medication for pain relief, constipation, heartburn: aspirin	EFO_0007056	Neale B	UKBB	European	2017	-0.004094	0.0008448	1.261e-06	-	333581	46946	286635	1	risk diff	Neale-B_UKBB_EUR_2017
rs3184504	chr12:111884608	C	T	Medication for pain relief, constipation, heartburn: omeprazole	EFO_0007056	Neale B	UKBB	European	2017	-0.002786	0.0005824	1.716e-06	-	333581	20058	313523	1	risk diff	Neale-B_UKBB_EUR_2017
rs3184504	chr12:111884608	C	T	No blood clot, bronchitis, emphysema, asthma, rhinitis, eczema or allergy diagnosed by doctor	-	Neale B	UKBB	European	2017	-0.007209	0.001138	2.386e-10	-	336782	228530	108252	1	risk diff	Neale-B_UKBB_EUR_2017
rs3184504	chr12:111884608	C	T	No treatment with medication for cholesterol, blood pressure, diabetes, or take exogenous hormones	EFO_0007056	Neale B	UKBB	European	2017	0.01033	0.001541	2.031e-11	+	180203	124239	55964	1	risk diff	Neale-B_UKBB_EUR_2017
rs3184504	chr12:111884608	C	T	Number of self-reported non-cancer illnesses	EFO_0009801	Neale B	UKBB	European	2017	-0.0135	0.002007	1.756e-11	-	337159	0	337159	1	-	Neale-B_UKBB_EUR_2017
rs3184504	chr12:111884608	C	T	Number of treatments or medications taken	EFO_0007056	Neale B	UKBB	European	2017	-0.0147	0.001949	4.543e-14	-	337159	0	337159	1	-	Neale-B_UKBB_EUR_2017
rs3184504	chr12:111884608	C	T	Past tobacco smoking	EFO_0006527	Neale B	UKBB	European	2017	0.02077	0.003167	5.483e-11	+	310749	0	310749	1	-	Neale-B_UKBB_EUR_2017
rs3184504	chr12:111884608	C	T	Self-reported gout	EFO_0004274	Neale B	UKBB	European	2017	-0.001337	0.0002872	3.25e-06	-	337159	4807	332352	1	risk diff	Neale-B_UKBB_EUR_2017
rs3184504	chr12:111884608	C	T	Self-reported heart attack or myocardial infarction	EFO_0000612	Neale B	UKBB	European	2017	-0.002037	0.0003629	1.983e-08	-	337159	7735	329424	1	risk diff	Neale-B_UKBB_EUR_2017
rs3184504	chr12:111884608	C	T	Self-reported hypertension	EFO_0000537	Neale B	UKBB	European	2017	-0.01159	0.001066	1.634e-27	-	337159	87690	249469	1	risk diff	Neale-B_UKBB_EUR_2017
rs3184504	chr12:111884608	C	T	Self-reported hypothyroidism or myxoedema	EFO_0004705;EFO_1001055	Neale B	UKBB	European	2017	-0.009931	0.0005186	1.104e-81	-	337159	16376	320783	1	risk diff	Neale-B_UKBB_EUR_2017
rs3184504	chr12:111884608	C	T	Self-reported malabsorption or coeliac disease	EFO_0001060	Neale B	UKBB	European	2017	-0.0007611	0.0001596	1.862e-06	-	337159	1452	335707	1	risk diff	Neale-B_UKBB_EUR_2017
rs3184504	chr12:111884608	C	T	Systolic blood pressure	EFO_0006335	Neale B	UKBB	European	2017	-0.02148	0.002461	2.536e-18	-	317754	0	317754	1	IVNT	Neale-B_UKBB_EUR_2017
rs3184504	chr12:111884608	C	T	Taking other prescription medications	EFO_0007056	Neale B	UKBB	European	2017	-0.009596	0.001217	3.181e-15	-	336330	158113	178217	1	risk diff	Neale-B_UKBB_EUR_2017
rs3184504	chr12:111884608	C	T	Treatment with allopurinol	EFO_0007056	Neale B	UKBB	European	2017	-0.001235	0.0002567	1.496e-06	-	337159	3819	333340	1	risk diff	Neale-B_UKBB_EUR_2017
rs3184504	chr12:111884608	C	T	Treatment with aspirin	EFO_0007056	Neale B	UKBB	European	2017	-0.003944	0.0008223	1.617e-06	-	337159	45012	292147	1	risk diff	Neale-B_UKBB_EUR_2017
rs3184504	chr12:111884608	C	T	Treatment with atenolol	EFO_0007056	Neale B	UKBB	European	2017	-0.003689	0.000472	5.495e-15	-	337159	13184	323975	1	risk diff	Neale-B_UKBB_EUR_2017
rs3184504	chr12:111884608	C	T	Treatment with bendroflumethiazide	EFO_0007056	Neale B	UKBB	European	2017	-0.002966	0.0005633	1.406e-07	-	337159	19084	318075	1	risk diff	Neale-B_UKBB_EUR_2017
rs3184504	chr12:111884608	C	T	Treatment with folic acid product	EFO_0007056	Neale B	UKBB	European	2017	-0.001024	0.0002204	3.416e-06	-	337159	2779	334380	1	risk diff	Neale-B_UKBB_EUR_2017
rs3184504	chr12:111884608	C	T	Treatment with insulin product	EFO_0007056	Neale B	UKBB	European	2017	-0.0011	0.0002406	4.861e-06	-	337159	3319	333840	1	risk diff	Neale-B_UKBB_EUR_2017
rs3184504	chr12:111884608	C	T	Treatment with levothyroxine sodium	EFO_0007056	Neale B	UKBB	European	2017	-0.008043	0.000478	1.66e-63	-	337159	13717	323442	1	risk diff	Neale-B_UKBB_EUR_2017
rs3184504	chr12:111884608	C	T	Treatment with ramipril	EFO_0007056	Neale B	UKBB	European	2017	-0.002325	0.0005132	5.882e-06	-	337159	15787	321372	1	risk diff	Neale-B_UKBB_EUR_2017
rs3184504	chr12:111884608	C	T	Treatment with thyroxine sodium	EFO_0007056	Neale B	UKBB	European	2017	-0.0006082	0.0001284	2.153e-06	-	337159	938	336221	1	risk diff	Neale-B_UKBB_EUR_2017
rs3184504	chr12:111884608	C	T	Vascular or heart problems diagnosed by doctor: heart attack	EFO_0000612	Neale B	UKBB	European	2017	-0.001994	0.0003646	4.581e-08	-	336683	7790	328893	1	risk diff	Neale-B_UKBB_EUR_2017
rs3184504	chr12:111884608	C	T	Vascular or heart problems diagnosed by doctor: stroke	EFO_0000712	Neale B	UKBB	European	2017	-0.001386	0.0003006	4.017e-06	-	336683	5198	331485	1	risk diff	Neale-B_UKBB_EUR_2017
rs3184504	chr12:111884608	C	T	Whole body fat-free mass	-	Neale B	UKBB	European	2017	0.01466	0.001536	1.382e-21	+	331291	0	331291	1	IVNT	Neale-B_UKBB_EUR_2017
rs3184504	chr12:111884608	C	T	Whole body water mass	-	Neale B	UKBB	European	2017	0.01473	0.001539	1.05e-21	+	331315	0	331315	1	IVNT	Neale-B_UKBB_EUR_2017
rs3184504	chr12:111884608	C	T	Rheumatoid arthritis	EFO_0000685	Okada Y	24390342	European	2014	-0.07696	0.01646	3e-07	-	58284	14361	43923	18	log OR	Okada-Y_RA_EUR_2014
rs3184504	chr12:111884608	C	T	Rheumatoid arthritis	EFO_0000685	Okada Y	24390342	Mixed	2014	-0.07696	0.01646	3e-07	-	80799	19234	61565	22	log OR	Okada-Y_RA_Mixed_2014
rs3184504	chr12:111884608	C	T	Blood pressure	EFO_0004325	Levy D	19430479	European	2009	NA	NA	3e-14	NA	-	-	-	-	-	dbGaP
rs3184504	chr12:111884608	C	T	Blood pressure	EFO_0004325	ICBP	21909115	European	2011	NA	NA	4e-25	NA	-	-	-	-	-	dbGaP
rs3184504	chr12:111884608	C	T	Diabetes mellitus type 1	EFO_0001359;EFO_0000400	Barrett JC	19430480	European	2009	NA	NA	3e-27	NA	-	-	-	-	-	dbGaP
rs3184504	chr12:111884608	C	T	Diabetes mellitus type 1	EFO_0001359;EFO_0000400	Plagnol V	21829393	Mixed	2011	NA	NA	2e-38	NA	-	-	-	-	-	dbGaP
rs3184504	chr12:111884608	C	T	Hypothyroidism	EFO_0004705	Eriksson N	22493691	European	2012	NA	NA	3e-12	NA	-	-	-	-	-	dbGaP
rs3184504	chr12:111884608	C	T	Coronary artery disease	EFO_0000378;EFO_0001645	van der Harst P	29212778	Mixed	2018	-0.06354	0.007106	3.8e-19	-	296525	34541	261984	1	log OR	van-der-Harst-P_CAD-UKBB_Mixed_2018
rs3184504	chr12:111884608	C	T	Coronary artery disease	EFO_0000378;EFO_0001645	van der Harst P	29212778	Mixed	2018	-0.0576	0.0055	1.03e-25	-	547261	122733	424528	2	log OR	van-der-Harst-P_CAD_Mixed_2018
rs7174918	chr15:99251356	C	T	Relative age of first facial hair	EFO_0007822	Neale B	UKBB	European	2017	0.009247	0.001704	5.732e-08	+	151113	0	151113	1	-	Neale-B_UKBB_EUR_2017
rs17013285	chr4:88767008	A	G	Serum urate	EFO_0004531	GUGC	23263486	European	2012	0.041	0.0083	3.116e-06	+	96399	0	96399	48	mg/dl	GUGC_Urate_EUR_2012
rs17013285	chr4:88767008	A	G	Self-reported gout	EFO_0004274	Neale B	UKBB	European	2017	0.002811	0.0003857	3.17e-13	+	337159	4807	332352	1	risk diff	Neale-B_UKBB_EUR_2017
rs2047866	chr15:76136194	T	C	Hematocrit	EFO_0004586	Astle W	27863252	European	2016	-0.03641	0.003584	3.063e-24	-	173480	0	173480	2	IVNT	Astle-W_Blood-Cell-Traits_EUR_2016
rs2047866	chr15:76136194	T	C	Hemoglobin concentration	EFO_0004586	Astle W	27863252	European	2016	-0.0351	0.0036	1.834e-22	-	173480	0	173480	2	IVNT	Astle-W_Blood-Cell-Traits_EUR_2016
rs2047866	chr15:76136194	T	C	Red blood cell count	EFO_0004586	Astle W	27863252	European	2016	-0.03125	0.00361	4.942e-18	-	173480	0	173480	2	IVNT	Astle-W_Blood-Cell-Traits_EUR_2016
rs10016702	chr4:10447640	A	G	Serum urate	NCIT_C64814	Yang Q	20884846	European	2010	NA	NA	2.6e-07	NA	28283	-	-	-	-	GRASP
rs10016702	chr4:10447640	A	G	Serum urate	NCIT_C64814	GUGC	23263486	European	2012	NA	NA	1.38e-12	NA	69374	-	-	-	-	GRASP
rs10016702	chr4:10447640	A	G	Serum urate	EFO_0004531	GUGC	23263486	European	2012	-0.068	0.009	1.377e-12	-	109942	0	109942	48	mg/dl	GUGC_Urate_EUR_2012
rs1047891	chr2:211540507	A	C	Eosinophil percentage of granulocytes	EFO_0004586	Astle W	27863252	European	2016	0.02165	0.003833	1.629e-08	+	173480	0	173480	2	IVNT	Astle-W_Blood-Cell-Traits_EUR_2016
rs1047891	chr2:211540507	A	C	Eosinophil percentage of white cells	EFO_0004586	Astle W	27863252	European	2016	0.02241	0.003816	4.292e-09	+	173480	0	173480	2	IVNT	Astle-W_Blood-Cell-Traits_EUR_2016
rs1047891	chr2:211540507	A	C	Lymphocyte count	EFO_0004586	Astle W	27863252	European	2016	-0.01856	0.003856	1.479e-06	-	173480	0	173480	2	IVNT	Astle-W_Blood-Cell-Traits_EUR_2016
rs1047891	chr2:211540507	A	C	Mean corpuscular hemoglobin	EFO_0004586	Astle W	27863252	European	2016	0.02439	0.00379	1.234e-10	+	173480	0	173480	2	IVNT	Astle-W_Blood-Cell-Traits_EUR_2016
rs1047891	chr2:211540507	A	C	Mean corpuscular volume	EFO_0004586	Astle W	27863252	European	2016	0.02424	0.003779	1.398e-10	+	173480	0	173480	2	IVNT	Astle-W_Blood-Cell-Traits_EUR_2016
rs1047891	chr2:211540507	A	C	Myeloid white cell count	EFO_0004586	Astle W	27863252	European	2016	-0.01805	0.003856	2.859e-06	-	173480	0	173480	2	IVNT	Astle-W_Blood-Cell-Traits_EUR_2016
rs1047891	chr2:211540507	A	C	Neutrophil count	EFO_0004586	Astle W	27863252	European	2016	-0.01816	0.003838	2.236e-06	-	173480	0	173480	2	IVNT	Astle-W_Blood-Cell-Traits_EUR_2016
rs1047891	chr2:211540507	A	C	Neutrophil percentage of granulocytes	EFO_0004586	Astle W	27863252	European	2016	-0.02019	0.003834	1.403e-07	-	173480	0	173480	2	IVNT	Astle-W_Blood-Cell-Traits_EUR_2016
rs1047891	chr2:211540507	A	C	Platelet count	EFO_0004586	Astle W	27863252	European	2016	-0.03417	0.003908	2.255e-18	-	173480	0	173480	2	IVNT	Astle-W_Blood-Cell-Traits_EUR_2016
rs1047891	chr2:211540507	A	C	Plateletcrit	EFO_0004586	Astle W	27863252	European	2016	-0.0236	0.003921	1.773e-09	-	173480	0	173480	2	IVNT	Astle-W_Blood-Cell-Traits_EUR_2016
rs1047891	chr2:211540507	A	C	Sum basophil neutrophil counts	EFO_0004586	Astle W	27863252	European	2016	-0.01851	0.003844	1.466e-06	-	173480	0	173480	2	IVNT	Astle-W_Blood-Cell-Traits_EUR_2016
rs1047891	chr2:211540507	A	C	White blood cell count	EFO_0004586	Astle W	27863252	European	2016	-0.02147	0.00384	2.255e-08	-	173480	0	173480	2	IVNT	Astle-W_Blood-Cell-Traits_EUR_2016
rs1047891	chr2:211540507	A	C	log eGFR creatinine in non diabetics	EFO_0005208	CKDGen	26831199	European	2016	-0.011	0.0011	3.3e-22	-	115499	0	115499	45	ml/min/1.73m2	CKDGen_eGFRcrea-NDM_EUR_2016
rs1047891	chr2:211540507	A	C	log eGFR creatinine	EFO_0005208	CKDGen	20383146	European	2010	NA	NA	2.4e-09	-	67093	0	67093	20	ml/min/1.73m2	CKDGen_eGFRcrea_EUR_2010
rs1047891	chr2:211540507	A	C	log eGFR creatinine	EFO_0005208	CKDGen	26831199	European	2016	-0.011	0.001	2.2e-23	-	130702	0	130702	48	ml/min/1.73m2	CKDGen_eGFRcrea_EUR_2016
rs1047891	chr2:211540507	A	C	High density lipoprotein	EFO_0004612	GLGC	20686565	Mixed	2010	-0.0292	0.0061	4.085e-06	-	99900	0	99900	46	Z-score	GLGC_HDL_Mixed_2010
rs1047891	chr2:211540507	A	C	Serum creatinine estimated glomerular filtration rate eGFR	NCIT_C110935;HP_0012213	CKDGen	20383146	European	2010	NA	NA	1.2e-15	NA	67093	-	-	-	-	GRASP
rs1047891	chr2:211540507	A	C	Chronic kidney disease	EFO_0004617;EFO_0003884	CKDGen	20383146	European	2010	0.01	0.001246	1e-15	+	-	-	-	-	ml/min/1.73m2 decrease	NHGRI-EBI_GWAS_Catalog
rs1047891	chr2:211540507	A	C	Glomerular filtration rate creatinine	EFO_0005208;EFO_0004518	CKDGen	26831199	European	2016	0.0106	0.001063	2e-23	+	-	-	-	-	unit decrease	NHGRI-EBI_GWAS_Catalog
rs1047891	chr2:211540507	A	C	Glomerular filtration rate creatinine	EFO_0005208;EFO_0004518	Gorski M	28452372	European	2017	0.0089	0.001082	2e-16	+	-	-	-	-	unit decrease	NHGRI-EBI_GWAS_Catalog
rs1047891	chr2:211540507	A	C	Glomerular filtration rate in non diabetics creatinine	EFO_0005208;EFO_0004518	CKDGen	26831199	European	2016	0.0106	0.001093	3e-22	+	-	-	-	-	unit decrease	NHGRI-EBI_GWAS_Catalog
rs1047891	chr2:211540507	A	C	Mean corpuscular hemoglobin	EFO_0004527	Astle W	27863252	European	2016	0.02439	0.003771	1e-10	+	-	-	-	-	unit increase	NHGRI-EBI_GWAS_Catalog
rs1047891	chr2:211540507	A	C	Mean corpuscular volume	EFO_0004526	Astle W	27863252	European	2016	0.02424	0.003749	1e-10	+	-	-	-	-	unit increase	NHGRI-EBI_GWAS_Catalog
rs1047891	chr2:211540507	A	C	Platelet count	EFO_0004309	Astle W	27863252	European	2016	0.03417	0.003901	2e-18	+	-	-	-	-	unit decrease	NHGRI-EBI_GWAS_Catalog
rs1047891	chr2:211540507	A	C	Serum metabolite levels	EFO_0005653	Yu B	24625756	African	2014	0.1	0.01442	4e-12	+	-	-	-	-	unit increase	NHGRI-EBI_GWAS_Catalog
rs1047891	chr2:211540507	A	C	Arm fat-free mass right	-	Neale B	UKBB	European	2017	0.01591	0.001627	1.379e-22	+	331221	0	331221	1	IVNT	Neale-B_UKBB_EUR_2017
rs1047891	chr2:211540507	A	C	Arm predicted mass left	-	Neale B	UKBB	European	2017	0.01613	0.001654	1.823e-22	+	331146	0	331146	1	IVNT	Neale-B_UKBB_EUR_2017
rs1047891	chr2:211540507	A	C	Arm predicted mass right	-	Neale B	UKBB	European	2017	0.01573	0.001621	2.927e-22	+	331216	0	331216	1	IVNT	Neale-B_UKBB_EUR_2017
rs1047891	chr2:211540507	A	C	Basal metabolic rate	EFO_0007777	Neale B	UKBB	European	2017	0.01689	0.001731	1.717e-22	+	331307	0	331307	1	IVNT	Neale-B_UKBB_EUR_2017
rs1047891	chr2:211540507	A	C	Body mass index	EFO_0004340	Neale B	UKBB	European	2017	0.01213	0.002584	2.65e-06	+	336107	0	336107	1	IVNT	Neale-B_UKBB_EUR_2017
rs1047891	chr2:211540507	A	C	Forced expiratory volume in 1-second, best measure	EFO_0004314	Neale B	UKBB	European	2017	0.01139	0.002457	3.583e-06	+	255492	0	255492	1	IVNT	Neale-B_UKBB_EUR_2017
rs1047891	chr2:211540507	A	C	Hand grip strength right	EFO_0006941	Neale B	UKBB	European	2017	0.009812	0.001887	1.995e-07	+	335842	0	335842	1	IVNT	Neale-B_UKBB_EUR_2017
rs1047891	chr2:211540507	A	C	Height	EFO_0004339	Neale B	UKBB	European	2017	0.009714	0.001856	1.661e-07	+	336474	0	336474	1	IVNT	Neale-B_UKBB_EUR_2017
rs1047891	chr2:211540507	A	C	Hip circumference	EFO_0005093	Neale B	UKBB	European	2017	0.01429	0.002587	3.278e-08	+	336601	0	336601	1	IVNT	Neale-B_UKBB_EUR_2017
rs1047891	chr2:211540507	A	C	Illnesses of mother: heart disease	EFO_0003777	Neale B	UKBB	European	2017	-0.007248	0.001076	1.615e-11	-	311606	62065	249541	1	risk diff	Neale-B_UKBB_EUR_2017
rs1047891	chr2:211540507	A	C	Impedance of arm right	-	Neale B	UKBB	European	2017	-0.01655	0.001836	2.03e-19	-	331279	0	331279	1	IVNT	Neale-B_UKBB_EUR_2017
rs1047891	chr2:211540507	A	C	Impedance of leg left	-	Neale B	UKBB	European	2017	-0.0208	0.002381	2.444e-18	-	331296	0	331296	1	IVNT	Neale-B_UKBB_EUR_2017
rs1047891	chr2:211540507	A	C	Impedance of whole body	-	Neale B	UKBB	European	2017	-0.02033	0.001991	1.81e-24	-	331284	0	331284	1	IVNT	Neale-B_UKBB_EUR_2017
rs1047891	chr2:211540507	A	C	Leg fat-free mass left	-	Neale B	UKBB	European	2017	0.01598	0.001719	1.477e-20	+	331258	0	331258	1	IVNT	Neale-B_UKBB_EUR_2017
rs1047891	chr2:211540507	A	C	Leg fat-free mass right	-	Neale B	UKBB	European	2017	0.01675	0.001719	1.945e-22	+	331285	0	331285	1	IVNT	Neale-B_UKBB_EUR_2017
rs1047891	chr2:211540507	A	C	Leg predicted mass left	-	Neale B	UKBB	European	2017	0.01581	0.001708	2.1e-20	+	331253	0	331253	1	IVNT	Neale-B_UKBB_EUR_2017
rs1047891	chr2:211540507	A	C	Leg predicted mass right	-	Neale B	UKBB	European	2017	0.01673	0.001707	1.146e-22	+	331285	0	331285	1	IVNT	Neale-B_UKBB_EUR_2017
rs1047891	chr2:211540507	A	C	Self-reported hypertension	EFO_0000537	Neale B	UKBB	European	2017	-0.005922	0.001146	2.365e-07	-	337159	87690	249469	1	risk diff	Neale-B_UKBB_EUR_2017
rs1047891	chr2:211540507	A	C	Self-reported migraine	EFO_0005296	Neale B	UKBB	European	2017	0.002006	0.0004431	5.992e-06	+	337159	10007	327152	1	risk diff	Neale-B_UKBB_EUR_2017
rs1047891	chr2:211540507	A	C	Systolic blood pressure	EFO_0006335	Neale B	UKBB	European	2017	-0.01612	0.002646	1.104e-09	-	317754	0	317754	1	IVNT	Neale-B_UKBB_EUR_2017
rs1047891	chr2:211540507	A	C	Trunk fat-free mass	-	Neale B	UKBB	European	2017	0.01706	0.001645	3.297e-25	+	331030	0	331030	1	IVNT	Neale-B_UKBB_EUR_2017
rs1047891	chr2:211540507	A	C	Weight	EFO_0004338	Neale B	UKBB	European	2017	0.0154	0.002282	1.493e-11	+	336227	0	336227	1	IVNT	Neale-B_UKBB_EUR_2017
rs1047891	chr2:211540507	A	C	Whole body fat-free mass	-	Neale B	UKBB	European	2017	0.01725	0.001651	1.507e-25	+	331291	0	331291	1	IVNT	Neale-B_UKBB_EUR_2017
rs1047891	chr2:211540507	A	C	Whole body water mass	-	Neale B	UKBB	European	2017	0.01747	0.001654	4.339e-26	+	331315	0	331315	1	IVNT	Neale-B_UKBB_EUR_2017
rs1047891	chr2:211540507	A	C	Creatinine	NCIT_C399;CHEBI_16737	CKDGen	20383146	European	2010	NA	NA	1e-15	NA	-	-	-	-	-	dbGaP
rs75487798	chr4:10445207	C	T	Treatment with allopurinol	EFO_0007056	Neale B	UKBB	European	2017	0.00324	0.000687	2.413e-06	+	337159	3819	333340	1	risk diff	Neale-B_UKBB_EUR_2017
rs7100474	chr10:60273121	C	T	Hematocrit	EFO_0004586	Astle W	27863252	European	2016	0.01875	0.003534	1.128e-07	+	173480	0	173480	2	IVNT	Astle-W_Blood-Cell-Traits_EUR_2016
rs7100474	chr10:60273121	C	T	Hemoglobin concentration	EFO_0004586	Astle W	27863252	European	2016	0.0187	0.00355	1.381e-07	+	173480	0	173480	2	IVNT	Astle-W_Blood-Cell-Traits_EUR_2016
rs7100474	chr10:60273121	C	T	Myopia	HP_0000545	Kiefer	23468642	European	2013	NA	NA	1.7e-07	NA	45771	-	-	-	-	GRASP
rs7100474	chr10:60273121	C	T	Heel bone mineral density	EFO_0009270	Neale B	UKBB	European	2017	0.02361	0.003124	4.082e-14	+	194398	0	194398	1	IVNT	Neale-B_UKBB_EUR_2017
rs7100474	chr10:60273121	C	T	Medication for cholesterol, blood pressure or diabetes: blood pressure medication	EFO_0007056	Neale B	UKBB	European	2017	-0.007272	0.001564	3.309e-06	-	154702	38548	116154	1	risk diff	Neale-B_UKBB_EUR_2017
rs7100474	chr10:60273121	C	T	Self-reported hypertension	EFO_0000537	Neale B	UKBB	European	2017	-0.006125	0.00107	1.029e-08	-	337159	87690	249469	1	risk diff	Neale-B_UKBB_EUR_2017
rs7100474	chr10:60273121	C	T	Systolic blood pressure	EFO_0006335	Neale B	UKBB	European	2017	-0.0119	0.00247	1.447e-06	-	317754	0	317754	1	IVNT	Neale-B_UKBB_EUR_2017
rs7100474	chr10:60273121	C	T	Vascular or heart problems diagnosed by doctor: high blood pressure	EFO_0004325	Neale B	UKBB	European	2017	-0.005452	0.001085	5.006e-07	-	336683	91033	245650	1	risk diff	Neale-B_UKBB_EUR_2017
rs1334576	chr6:7211818	G	A	Eosinophil percentage of granulocytes	EFO_0004586	Astle W	27863252	European	2016	-0.01715	0.003609	2.009e-06	-	173480	0	173480	2	IVNT	Astle-W_Blood-Cell-Traits_EUR_2016
rs1334576	chr6:7211818	G	A	Granulocyte count	EFO_0004586	Astle W	27863252	European	2016	0.01647	0.003621	5.418e-06	+	173480	0	173480	2	IVNT	Astle-W_Blood-Cell-Traits_EUR_2016
rs1334576	chr6:7211818	G	A	Hematocrit	EFO_0004586	Astle W	27863252	European	2016	-0.01856	0.00356	1.851e-07	-	173480	0	173480	2	IVNT	Astle-W_Blood-Cell-Traits_EUR_2016
rs1334576	chr6:7211818	G	A	Hemoglobin concentration	EFO_0004586	Astle W	27863252	European	2016	-0.02023	0.003576	1.547e-08	-	173480	0	173480	2	IVNT	Astle-W_Blood-Cell-Traits_EUR_2016
rs1334576	chr6:7211818	G	A	Myeloid white cell count	EFO_0004586	Astle W	27863252	European	2016	0.01663	0.00363	4.63e-06	+	173480	0	173480	2	IVNT	Astle-W_Blood-Cell-Traits_EUR_2016
rs1334576	chr6:7211818	G	A	Neutrophil count	EFO_0004586	Astle W	27863252	European	2016	0.01833	0.003612	3.863e-07	+	173480	0	173480	2	IVNT	Astle-W_Blood-Cell-Traits_EUR_2016
rs1334576	chr6:7211818	G	A	Plateletcrit	EFO_0004586	Astle W	27863252	European	2016	0.01707	0.003687	3.647e-06	+	173480	0	173480	2	IVNT	Astle-W_Blood-Cell-Traits_EUR_2016
rs1334576	chr6:7211818	G	A	Red blood cell count	EFO_0004586	Astle W	27863252	European	2016	-0.02017	0.003581	1.78e-08	-	173480	0	173480	2	IVNT	Astle-W_Blood-Cell-Traits_EUR_2016
rs1334576	chr6:7211818	G	A	Reticulocyte fraction of red cells	EFO_0004586	Astle W	27863252	European	2016	0.0167	0.003619	3.916e-06	+	173480	0	173480	2	IVNT	Astle-W_Blood-Cell-Traits_EUR_2016
rs1334576	chr6:7211818	G	A	Sum basophil neutrophil counts	EFO_0004586	Astle W	27863252	European	2016	0.01828	0.003619	4.378e-07	+	173480	0	173480	2	IVNT	Astle-W_Blood-Cell-Traits_EUR_2016
rs1334576	chr6:7211818	G	A	Sum neutrophil eosinophil counts	EFO_0004586	Astle W	27863252	European	2016	0.01644	0.003615	5.439e-06	+	173480	0	173480	2	IVNT	Astle-W_Blood-Cell-Traits_EUR_2016
rs1334576	chr6:7211818	G	A	White blood cell count	EFO_0004586	Astle W	27863252	European	2016	0.01674	0.003615	3.646e-06	+	173480	0	173480	2	IVNT	Astle-W_Blood-Cell-Traits_EUR_2016
rs1334576	chr6:7211818	G	A	Height	EFO_0004339	GIANT	25282103	European	2014	-0.019	0.003	3.9e-10	-	252253	0	252253	79	Z-score	GIANT_Height_EUR_2014
rs1334576	chr6:7211818	G	A	Height	EFO_0004339	GIANT	28146470	European	2017	-0.014	0.0025	1.5e-08	-	381625	0	381625	106	IVNT	GIANT_Height_EUR_2017
rs1334576	chr6:7211818	G	A	Comparative height size at age 10	-	Neale B	UKBB	European	2017	-0.008035	0.001676	1.625e-06	-	332021	0	332021	1	-	Neale-B_UKBB_EUR_2017
rs1334576	chr6:7211818	G	A	Heel bone mineral density	EFO_0009270	Neale B	UKBB	European	2017	-0.01622	0.003144	2.495e-07	-	194398	0	194398	1	IVNT	Neale-B_UKBB_EUR_2017
rs1334576	chr6:7211818	G	A	Height	EFO_0004339	Neale B	UKBB	European	2017	-0.00984	0.001744	1.68e-08	-	336474	0	336474	1	IVNT	Neale-B_UKBB_EUR_2017
rs1334576	chr6:7211818	G	A	Sitting height	EFO_0004339	Neale B	UKBB	European	2017	-0.009947	0.001897	1.583e-07	-	336172	0	336172	1	IVNT	Neale-B_UKBB_EUR_2017
rs2231157	chr4:89018565	G	A	Self-reported gout	EFO_0004274	Neale B	UKBB	European	2017	-0.001837	0.0002887	1.963e-10	-	337159	4807	332352	1	risk diff	Neale-B_UKBB_EUR_2017
rs2231157	chr4:89018565	G	A	Treatment with allopurinol	EFO_0007056	Neale B	UKBB	European	2017	-0.001416	0.000258	4.081e-08	-	337159	3819	333340	1	risk diff	Neale-B_UKBB_EUR_2017
rs4244812	chr11:65480768	A	G	Mean platelet volume	EFO_0004586	Astle W	27863252	European	2016	0.02297	0.003615	2.071e-10	+	173480	0	173480	2	IVNT	Astle-W_Blood-Cell-Traits_EUR_2016
rs4244812	chr11:65480768	A	G	Platelet count	EFO_0004586	Astle W	27863252	European	2016	-0.02047	0.003644	1.948e-08	-	173480	0	173480	2	IVNT	Astle-W_Blood-Cell-Traits_EUR_2016
rs4244812	chr11:65480768	A	G	log eGFR creatinine in non diabetics	EFO_0005208	CKDGen	26831199	European	2016	0.0044	0.00092	1.6e-06	+	115479	0	115479	45	ml/min/1.73m2	CKDGen_eGFRcrea-NDM_EUR_2016
rs4244812	chr11:65480768	A	G	log eGFR creatinine	EFO_0005208	CKDGen	26831199	European	2016	0.0046	0.00092	2.3e-07	+	130471	0	130471	48	ml/min/1.73m2	CKDGen_eGFRcrea_EUR_2016
rs4244812	chr11:65480768	A	G	Serum creatinine	EFO_0004518	CKDGen	20383146	European	2010	NA	NA	1.7e-07	NA	67093	-	-	-	-	GRASP
rs838144	chr19:49250239	T	C	Platelet count	EFO_0004586	Astle W	27863252	European	2016	-0.01885	0.003676	2.954e-07	-	173480	0	173480	2	IVNT	Astle-W_Blood-Cell-Traits_EUR_2016
rs838144	chr19:49250239	T	C	Low density lipoprotein	EFO_0004611	GLGC	24097068	European	2013	-0.0289	0.0054	4.745e-07	-	88433	0	88433	60	IVNT	GLGC_LDL_EUR_2013
rs838144	chr19:49250239	T	C	Total cholesterol	EFO_0004574	GLGC	24097068	European	2013	-0.0337	0.0053	3.109e-09	-	93067	0	93067	60	IVNT	GLGC_TC_EUR_2013
rs838144	chr19:49250239	T	C	Total cholesterol	EFO_0004574	GLGC	20686565	Mixed	2010	-0.0315	0.0053	3.36e-09	-	100184	0	100184	46	Z-score	GLGC_TC_Mixed_2010
rs838144	chr19:49250239	T	C	Total cholesterol	NCIT_C61032;NCIT_C105586	GLGC	20686565	Mixed	2010	NA	NA	3.36e-09	NA	100184	-	-	-	-	GRASP
rs838144	chr19:49250239	T	C	Alcohol intake frequency	EFO_0004329	Neale B	UKBB	European	2017	0.02264	0.003566	2.176e-10	+	336965	0	336965	1	-	Neale-B_UKBB_EUR_2017
[truncated: 7,183 more rows]

## Sheet: Table S4
rsID	Coordinates (hg19)	Alt	Ref	Trait	EFO	Study	PMID	Ancestry	Year	Estimate	SE	P-value	Direction	N	Cases	Controls	Number of studies	Unit	Dataset
[truncated: 9,146 more rows]

[truncated: 5 more sheets: Table S5, Table S6, Table S7, Table S8, Table S9]
