# Supplementary material for: Transforming polygenic risk prediction: functional annotation and digital twin modeling with whole-exome sequencing
Source: Research Square preprint supplement (doi:10.21203/rs.3.rs-6169446/v1), 2025-03-10
Supplement: Supplementary file 5 [file 453a5e55864fad5ce3c0f2f6.xlsx]

## Sheet: Description
Supplementary Data 3	Supplementary information on gene-set analyses (FUMA)
Table S1	Summary of the gene-set analysis for pathways of the exome-based summary statistics. Summary statistics from the reference dataset (UK Biobank) obtained from MAGMA using the curated set protein-coding genes from FUMA.
Table S2	Summary of the gene-set analysis for pathways of the imputed array-based summary statistics. Summary statistics from the reference dataset (UK Biobank) obtained from MAGMA using the curated set protein-coding genes from FUMA.
Table S3	Summary of the gene-set analysis for gene-expression of the exome-based summary statistics. Summary statistics from the reference dataset (UK Biobank) obtained from MAGMA using the MSigDB database from FUMA.
Table S4	Summary of the gene-set analysis for gene-expression of the imputed array-based summary statistics. Summary statistics from the reference dataset (UK Biobank) obtained from MAGMA using the MSigDB database from FUMA.

## Sheet: Table S1
Trait	Variable	Number of genes	Beta	SD	SE	P-value	Full set
ALB	REACTOME_MET_RECEPTOR_ACTIVA...	4	2.9537	0.050274	0.53595	1.816e-08	REACTOME_MET_RECEPTOR_ACTIVATION
ALP	KEGG_DRUG_METABOLISM_CYTOCHR...	56	0.65244	0.041473	0.14387	2.9084e-06	KEGG_DRUG_METABOLISM_CYTOCHROME_P450
ALP	GOBP_REGULATION_OF_LIPOPOLYS...	18	1.0837	0.039108	0.23534	2.0836e-06	GOBP_REGULATION_OF_LIPOPOLYSACCHARIDE_MEDIATED_SIGNALING_PATHWAY
ALP	GOBP_ETHANOL_OXIDATION	8	2.0016	0.048173	0.41268	6.2387e-07	GOBP_ETHANOL_OXIDATION
ALP	GOBP_POSITIVE_REGULATION_OF_...355	2	3.9354	0.047368	0.80755	5.553e-07	GOBP_POSITIVE_REGULATION_OF_HIGH_DENSITY_LIPOPROTEIN_PARTICLE_CLEARANCE
ALP	GOBP_REGULATION_OF_HIGH_DENS...	2	3.9354	0.047368	0.80755	5.553e-07	GOBP_REGULATION_OF_HIGH_DENSITY_LIPOPROTEIN_PARTICLE_CLEARANCE
ALP	LOPEZ_MESOTHELIOMA_SURVIVAL_...3	4	2.859	0.048662	0.57146	2.8599e-07	LOPEZ_MESOTHELIOMA_SURVIVAL_OVERALL_UP
ALP	GOBP_LIPID_METABOLIC_PROCESS	1033	0.1852	0.048731	0.035894	1.2551e-07	GOBP_LIPID_METABOLIC_PROCESS
ALP	PHESSE_TARGETS_OF_APC_AND_MB...2	14	1.389	0.044215	0.26396	7.2255e-08	PHESSE_TARGETS_OF_APC_AND_MBD2_UP
ALP	GOMF_ALCOHOL_DEHYDROGENASE_A...	6	2.6513	0.055265	0.47968	1.6575e-08	GOMF_ALCOHOL_DEHYDROGENASE_ACTIVITY_ZINC_DEPENDENT
ALP	ZHENG_FOXP3_TARGETS_IN_THYMU...1	10	1.7825	0.047961	0.30672	3.1664e-09	ZHENG_FOXP3_TARGETS_IN_THYMUS_DN
ALP	HOWLIN_CITED1_TARGETS_2_DN	15	1.6224	0.053455	0.26921	8.5934e-10	HOWLIN_CITED1_TARGETS_2_DN
ALP	GOBP_SUPPRESSION_OF_VIRAL_RE...	10	2.2091	0.059438	0.31694	1.6588e-12	GOBP_SUPPRESSION_OF_VIRAL_RELEASE_BY_HOST
ALP	GOBP_NEGATIVE_REGULATION_OF_...716	14	1.8928	0.060252	0.27008	1.2623e-12	GOBP_NEGATIVE_REGULATION_OF_VIRAL_LIFE_CYCLE
ALP	GOBP_NEGATIVE_REGULATION_OF_...713	13	2.0108	0.061682	0.27794	2.4579e-13	GOBP_NEGATIVE_REGULATION_OF_VIRAL_ENTRY_INTO_HOST_CELL
ALP	GOCC_OMEGASOME	4	3.4602	0.058896	0.40674	9.8534e-18	GOCC_OMEGASOME
ALT	GOBP_OUTER_MITOCHONDRIAL_MEM...	10	1.8361	0.049403	0.34219	4.0981e-08	GOBP_OUTER_MITOCHONDRIAL_MEMBRANE_ORGANIZATION
ALT	GOBP_NEGATIVE_REGULATION_OF_...144	2	4.2067	0.050634	0.75726	1.4128e-08	GOBP_NEGATIVE_REGULATION_OF_CHOLESTEROL_METABOLIC_PROCESS
APOA	GOBP_REGULATION_OF_CHOLESTER...2	31	0.9445	0.04471	0.20871	3.0386e-06	GOBP_REGULATION_OF_CHOLESTEROL_EFFLUX
APOA	GOBP_LIPID_DIGESTION	15	1.3131	0.043262	0.2896	2.9177e-06	GOBP_LIPID_DIGESTION
APOA	GOBP_REGULATION_OF_LIPID_TRA...1	103	0.50444	0.043413	0.11082	2.6812e-06	GOBP_REGULATION_OF_LIPID_TRANSPORT
APOA	GOBP_INTESTINAL_ABSORPTION	27	0.98234	0.043404	0.21515	2.5095e-06	GOBP_INTESTINAL_ABSORPTION
APOA	GOBP_CHOLESTEROL_IMPORT	5	2.1918	0.041707	0.47605	2.0908e-06	GOBP_CHOLESTEROL_IMPORT
APOA	GOBP_ORGANIC_HYDROXY_COMPOUN...3	403	0.25617	0.043128	0.055279	1.8091e-06	GOBP_ORGANIC_HYDROXY_COMPOUND_METABOLIC_PROCESS
APOA	REACTOME_LDL_REMODELING	5	2.3112	0.04398	0.49729	1.6958e-06	REACTOME_LDL_REMODELING
APOA	GOBP_POSITIVE_REGULATION_OF_...445	67	0.63209	0.043931	0.13595	1.6801e-06	GOBP_POSITIVE_REGULATION_OF_LIPID_TRANSPORT
APOA	GOBP_NEUTRAL_LIPID_METABOLIC...	99	0.50218	0.042377	0.10784	1.6236e-06	GOBP_NEUTRAL_LIPID_METABOLIC_PROCESS
APOA	GOBP_POSITIVE_REGULATION_OF_...444	19	1.1754	0.043577	0.25229	1.606e-06	GOBP_POSITIVE_REGULATION_OF_LIPID_STORAGE
APOA	GOBP_LOW_DENSITY_LIPOPROTEIN...1	23	1.0449	0.042617	0.22175	1.2389e-06	GOBP_LOW_DENSITY_LIPOPROTEIN_PARTICLE_CLEARANCE
APOA	GOBP_ALCOHOL_METABOLIC_PROCE...	259	0.32323	0.043859	0.0684	1.1587e-06	GOBP_ALCOHOL_METABOLIC_PROCESS
APOA	GOBP_REGULATION_OF_CHOLESTER...1	13	1.4645	0.044924	0.30857	1.0468e-06	GOBP_REGULATION_OF_CHOLESTEROL_BIOSYNTHETIC_PROCESS
APOA	GOBP_NEGATIVE_REGULATION_OF_...382	11	1.6629	0.046925	0.34707	8.3755e-07	GOBP_NEGATIVE_REGULATION_OF_MACROPHAGE_DERIVED_FOAM_CELL_DIFFERENTIATION
APOA	GOMF_PHOSPHATIDYLSERINE_1_AC...	8	1.8795	0.045234	0.3893	6.98e-07	GOMF_PHOSPHATIDYLSERINE_1_ACYLHYDROLASE_ACTIVITY
APOA	GOMF_LOW_DENSITY_LIPOPROTEIN...3	21	1.1349	0.044233	0.2346	6.6436e-07	GOMF_LOW_DENSITY_LIPOPROTEIN_PARTICLE_RECEPTOR_BINDING
APOA	GOCC_LOW_DENSITY_LIPOPROTEIN...	8	1.9241	0.046308	0.39329	5.0432e-07	GOCC_LOW_DENSITY_LIPOPROTEIN_PARTICLE
APOA	GOBP_FOAM_CELL_DIFFERENTIATI...	29	1.0039	0.045965	0.20406	4.3921e-07	GOBP_FOAM_CELL_DIFFERENTIATION
APOA	GOBP_PHOSPHOLIPID_HOMEOSTASIS	14	1.462	0.046538	0.29717	4.3819e-07	GOBP_PHOSPHOLIPID_HOMEOSTASIS
APOA	BIOCARTA_FXR_PATHWAY	5	2.4531	0.046681	0.49686	4.0105e-07	BIOCARTA_FXR_PATHWAY
APOA	GOBP_INTESTINAL_CHOLESTEROL_...	12	1.5578	0.045911	0.31457	3.7162e-07	GOBP_INTESTINAL_CHOLESTEROL_ABSORPTION
APOA	REACTOME_ASSEMBLY_OF_ACTIVE_...	12	1.6012	0.047191	0.32095	3.0745e-07	REACTOME_ASSEMBLY_OF_ACTIVE_LPL_AND_LIPC_LIPASE_COMPLEXES
APOA	GOBP_PROTEIN_LIPID_COMPLEX_A...	19	1.2881	0.047757	0.25516	2.2586e-07	GOBP_PROTEIN_LIPID_COMPLEX_ASSEMBLY
APOA	GOBP_TRIGLYCERIDE_CATABOLIC_...	18	1.3224	0.047722	0.26109	2.0699e-07	GOBP_TRIGLYCERIDE_CATABOLIC_PROCESS
APOA	GOMF_TRIGLYCERIDE_BINDING	3	3.2591	0.048042	0.64227	1.9706e-07	GOMF_TRIGLYCERIDE_BINDING
APOA	REACTOME_SCAVENGING_BY_CLASS...2	5	2.3256	0.044254	0.44623	9.4971e-08	REACTOME_SCAVENGING_BY_CLASS_B_RECEPTORS
APOA	GOBP_REGULATION_OF_STEROL_TR...	47	0.88667	0.051652	0.16862	7.3814e-08	GOBP_REGULATION_OF_STEROL_TRANSPORT
APOA	REACTOME_NR1H3_NR1H2_REGULAT...	29	1.1252	0.051523	0.21235	5.9113e-08	REACTOME_NR1H3_NR1H2_REGULATE_GENE_EXPRESSION_LINKED_TO_CHOLESTEROL_TRANSPORT_AND_EFFLUX
APOA	GOBP_TRIGLYCERIDE_METABOLIC_...	75	0.6623	0.048687	0.12447	5.2488e-08	GOBP_TRIGLYCERIDE_METABOLIC_PROCESS
APOA	GOBP_POSITIVE_REGULATION_OF_...178	5	2.6655	0.050721	0.49768	4.3297e-08	GOBP_POSITIVE_REGULATION_OF_COA_TRANSFERASE_ACTIVITY
APOA	GOBP_REGULATION_OF_COA_TRANS...	5	2.6655	0.050721	0.49768	4.3297e-08	GOBP_REGULATION_OF_COA_TRANSFERASE_ACTIVITY
APOA	GOBP_REGULATION_OF_MACROPHAG...4	24	1.2044	0.050176	0.22368	3.6965e-08	GOBP_REGULATION_OF_MACROPHAGE_DERIVED_FOAM_CELL_DIFFERENTIATION
APOA	GOMF_APOLIPOPROTEIN_BINDING	15	1.5185	0.050031	0.27968	2.8745e-08	GOMF_APOLIPOPROTEIN_BINDING
APOA	GOMF_LIPOPROTEIN_PARTICLE_RE...2	23	1.2203	0.049771	0.22474	2.8694e-08	GOMF_LIPOPROTEIN_PARTICLE_RECEPTOR_BINDING
APOA	GOBP_CHOLESTEROL_CATABOLIC_P...	8	2.1737	0.052316	0.39339	1.672e-08	GOBP_CHOLESTEROL_CATABOLIC_PROCESS
APOA	GOBP_REGULATION_OF_LIPID_LOC...	125	0.56475	0.053499	0.10032	9.219e-09	GOBP_REGULATION_OF_LIPID_LOCALIZATION
APOA	GOBP_CHOLESTEROL_STORAGE	15	1.5783	0.052002	0.27627	5.672e-09	GOBP_CHOLESTEROL_STORAGE
APOA	GOBP_INTESTINAL_LIPID_ABSORP...	15	1.6256	0.05356	0.28242	4.4021e-09	GOBP_INTESTINAL_LIPID_ABSORPTION
APOA	GOBP_TRIGLYCERIDE_RICH_LIPOP...1	3	3.7511	0.055295	0.64238	2.6804e-09	GOBP_TRIGLYCERIDE_RICH_LIPOPROTEIN_PARTICLE_CLEARANCE
APOA	REACTOME_PLASMA_LIPOPROTEIN_...3	31	1.1631	0.055057	0.19891	2.5568e-09	REACTOME_PLASMA_LIPOPROTEIN_CLEARANCE
APOA	GOBP_POSITIVE_REGULATION_OF_...768	30	1.2402	0.057754	0.21136	2.2637e-09	GOBP_POSITIVE_REGULATION_OF_STEROL_TRANSPORT
APOA	GOBP_REGULATION_OF_CDC42_PRO...	6	2.6743	0.055744	0.45388	1.9534e-09	GOBP_REGULATION_OF_CDC42_PROTEIN_SIGNAL_TRANSDUCTION
APOA	GOMF_LOW_DENSITY_LIPOPROTEIN...1	15	1.6315	0.053753	0.27614	1.7718e-09	GOMF_LOW_DENSITY_LIPOPROTEIN_PARTICLE_BINDING
APOA	REACTOME_METABOLISM_OF_FAT_S...	33	1.1276	0.055067	0.18877	1.1928e-09	REACTOME_METABOLISM_OF_FAT_SOLUBLE_VITAMINS
APOA	GOBP_STEROID_METABOLIC_PROCE...	231	0.43451	0.055738	0.071107	5.0987e-10	GOBP_STEROID_METABOLIC_PROCESS
APOA	GOBP_POSITIVE_REGULATION_OF_...163	6	2.5351	0.052844	0.41423	4.8042e-10	GOBP_POSITIVE_REGULATION_OF_CHOLESTEROL_STORAGE
APOA	GOBP_PHOSPHOLIPID_EFFLUX	9	2.273	0.058022	0.3704	4.3367e-10	GOBP_PHOSPHOLIPID_EFFLUX
APOA	GOBP_POSITIVE_REGULATION_OF_...442	85	0.75391	0.058979	0.12041	1.969e-10	GOBP_POSITIVE_REGULATION_OF_LIPID_LOCALIZATION
APOA	REACTOME_PLASMA_LIPOPROTEIN_...1	14	1.9204	0.06113	0.30534	1.643e-10	REACTOME_PLASMA_LIPOPROTEIN_ASSEMBLY
APOA	GOMF_STEROL_TRANSPORTER_ACTI...	29	1.2999	0.059521	0.20526	1.2393e-10	GOMF_STEROL_TRANSPORTER_ACTIVITY
APOA	GOBP_LIPID_HOMEOSTASIS	115	0.6538	0.059428	0.1023	8.5166e-11	GOBP_LIPID_HOMEOSTASIS
APOA	GOCC_TRIGLYCERIDE_RICH_PLASM...	14	1.9596	0.062376	0.30561	7.4275e-11	GOCC_TRIGLYCERIDE_RICH_PLASMA_LIPOPROTEIN_PARTICLE
APOA	GOBP_SECONDARY_ALCOHOL_METAB...	100	0.70541	0.059824	0.10922	5.469e-11	GOBP_SECONDARY_ALCOHOL_METABOLIC_PROCESS
APOA	GOBP_CHOLESTEROL_EFFLUX	43	1.1628	0.064799	0.17478	1.4951e-11	GOBP_CHOLESTEROL_EFFLUX
APOA	REACTOME_CHYLOMICRON_ASSEMBLY	6	3.0253	0.063061	0.45374	1.353e-11	REACTOME_CHYLOMICRON_ASSEMBLY
APOA	GOBP_PLASMA_LIPOPROTEIN_PART...	31	1.2897	0.061051	0.19313	1.2604e-11	GOBP_PLASMA_LIPOPROTEIN_PARTICLE_CLEARANCE
APOA	GOMF_PHOSPHATIDYLCHOLINE_STE...	3	4.3063	0.063479	0.64225	1.048e-11	GOMF_PHOSPHATIDYLCHOLINE_STEROL_O_ACYLTRANSFERASE_ACTIVATOR_ACTIVITY
APOA	GOBP_NEGATIVE_REGULATION_OF_...144	2	5.2918	0.063694	0.78479	8.0779e-12	GOBP_NEGATIVE_REGULATION_OF_CHOLESTEROL_METABOLIC_PROCESS
APOA	GOBP_STEROL_TRANSPORT	97	0.77761	0.064958	0.11373	4.2007e-12	GOBP_STEROL_TRANSPORT
APOA	WP_FAMILIAL_HYPERLIPIDEMIA_T...4	16	1.898	0.064584	0.27725	3.9659e-12	WP_FAMILIAL_HYPERLIPIDEMIA_TYPE_4
APOA	REACTOME_HDL_REMODELING	6	3.1405	0.065464	0.45354	2.2866e-12	REACTOME_HDL_REMODELING
APOA	GOBP_STEROL_METABOLIC_PROCESS	109	0.75047	0.066426	0.10469	3.9929e-13	GOBP_STEROL_METABOLIC_PROCESS
APOA	GOBP_LOW_DENSITY_LIPOPROTEIN...2	10	2.5335	0.068168	0.35217	3.3159e-13	GOBP_LOW_DENSITY_LIPOPROTEIN_PARTICLE_REMODELING
APOA	GOMF_STEROL_TRANSFER_ACTIVITY	18	1.8882	0.06814	0.26226	3.1846e-13	GOMF_STEROL_TRANSFER_ACTIVITY
APOA	GOCC_CHYLOMICRON	8	2.9163	0.070189	0.39299	6.1667e-14	GOCC_CHYLOMICRON
APOA	GOMF_PROTEIN_LIPID_COMPLEX_B...	22	1.73	0.069012	0.2307	3.4204e-14	GOMF_PROTEIN_LIPID_COMPLEX_BINDING
APOA	GOCC_PROTEIN_LIPID_COMPLEX	29	1.6383	0.075015	0.21227	6.3308e-15	GOCC_PROTEIN_LIPID_COMPLEX
APOA	REACTOME_PLASMA_LIPOPROTEIN_...2	57	1.189	0.076247	0.14693	3.1794e-16	REACTOME_PLASMA_LIPOPROTEIN_ASSEMBLY_REMODELING_AND_CLEARANCE
APOA	GOCC_HIGH_DENSITY_LIPOPROTEI...	17	2.2884	0.080262	0.28275	3.1452e-16	GOCC_HIGH_DENSITY_LIPOPROTEIN_PARTICLE
APOA	WP_CHOLESTEROL_METABOLISM	54	1.1996	0.074887	0.14769	2.4756e-16	WP_CHOLESTEROL_METABOLISM
APOA	REACTOME_CHYLOMICRON_CLEARAN...	5	4.2031	0.079982	0.49632	1.3718e-17	REACTOME_CHYLOMICRON_CLEARANCE
APOA	REACTOME_PLASMA_LIPOPROTEIN_...4	22	2.0117	0.080249	0.23671	1.0604e-17	REACTOME_PLASMA_LIPOPROTEIN_REMODELING
APOA	GOMF_APOLIPOPROTEIN_A_I_BIND...	2	6.7028	0.080678	0.78437	7.0889e-18	GOMF_APOLIPOPROTEIN_A_I_BINDING
APOA	GOBP_STEROL_HOMEOSTASIS	68	1.148	0.080375	0.13349	4.4431e-18	GOBP_STEROL_HOMEOSTASIS
APOA	WP_FAMILIAL_HYPERLIPIDEMIA_T...2	11	2.9691	0.083785	0.33464	4.0223e-19	WP_FAMILIAL_HYPERLIPIDEMIA_TYPE_2
APOA	GOBP_HIGH_DENSITY_LIPOPROTEI...2	5	4.4103	0.083924	0.49605	3.4183e-19	GOBP_HIGH_DENSITY_LIPOPROTEIN_PARTICLE_CLEARANCE
APOA	GOBP_ACYLGLYCEROL_HOMEOSTASIS	23	2.0371	0.083087	0.22724	1.7611e-19	GOBP_ACYLGLYCEROL_HOMEOSTASIS
APOA	GOBP_REGULATION_OF_PLASMA_LI...	52	1.3644	0.083589	0.15211	1.6788e-19	GOBP_REGULATION_OF_PLASMA_LIPOPROTEIN_PARTICLE_LEVELS
APOA	WP_FAMILIAL_HYPERLIPIDEMIA_T...1	9	3.5089	0.089569	0.36973	1.3454e-21	WP_FAMILIAL_HYPERLIPIDEMIA_TYPE_1
APOA	WP_FAMILIAL_HYPERLIPIDEMIA_T...5	9	3.5089	0.089569	0.36973	1.3454e-21	WP_FAMILIAL_HYPERLIPIDEMIA_TYPE_5
APOA	GOBP_PROTEIN_LIPID_COMPLEX_S...	33	1.9067	0.093116	0.1956	1.1197e-22	GOBP_PROTEIN_LIPID_COMPLEX_SUBUNIT_ORGANIZATION
APOA	REACTOME_CHYLOMICRON_REMODEL...	4	5.907	0.10054	0.55436	1.0489e-26	REACTOME_CHYLOMICRON_REMODELING
APOA	WP_LIPID_PARTICLES_COMPOSITI...	5	5.3992	0.10274	0.4954	7.6519e-28	WP_LIPID_PARTICLES_COMPOSITION
APOA	GOBP_TRIGLYCERIDE_RICH_LIPOP...2	6	4.9661	0.10352	0.45254	3.3605e-28	GOBP_TRIGLYCERIDE_RICH_LIPOPROTEIN_PARTICLE_REMODELING
APOA	WP_STATIN_INHIBITION_OF_CHOL...	22	2.6142	0.10429	0.23662	1.4833e-28	WP_STATIN_INHIBITION_OF_CHOLESTEROL_PRODUCTION
APOA	GOBP_HIGH_DENSITY_LIPOPROTEI...3	10	3.9434	0.1061	0.35053	1.5698e-29	GOBP_HIGH_DENSITY_LIPOPROTEIN_PARTICLE_REMODELING
APOA	GOBP_PROTEIN_CONTAINING_COMP...4	21	2.8075	0.10942	0.24667	3.5507e-30	GOBP_PROTEIN_CONTAINING_COMPLEX_REMODELING
APOA	GOBP_REVERSE_CHOLESTEROL_TRA...	11	3.9248	0.11075	0.33404	5.1004e-32	GOBP_REVERSE_CHOLESTEROL_TRANSPORT
APOA	WP_FAMILIAL_HYPERLIPIDEMIA_T...3	10	4.2921	0.11548	0.35	1.0956e-34	WP_FAMILIAL_HYPERLIPIDEMIA_TYPE_3
APOA	WP_METABOLIC_PATHWAY_OF_LDL_...	13	4.0992	0.12574	0.3069	9.8228e-41	WP_METABOLIC_PATHWAY_OF_LDL_HDL_AND_TG_INCLUDING_DISEASES
APOB	HOWLIN_CITED1_TARGETS_2_DN	15	1.1906	0.039229	0.25972	2.2983e-06	HOWLIN_CITED1_TARGETS_2_DN
APOB	GOCC_EXTRINSIC_COMPONENT_OF_...4	7	1.91	0.043002	0.41632	2.261e-06	GOCC_EXTRINSIC_COMPONENT_OF_EXTERNAL_SIDE_OF_PLASMA_MEMBRANE
APOB	GOCC_LOW_DENSITY_LIPOPROTEIN...	7	1.9188	0.043202	0.4165	2.0609e-06	GOCC_LOW_DENSITY_LIPOPROTEIN_PARTICLE
APOB	REACTOME_NECTIN_NECL_TRANS_H...	6	2.0863	0.04349	0.45071	1.8547e-06	REACTOME_NECTIN_NECL_TRANS_HETERODIMERIZATION
APOB	GOBP_NEGATIVE_REGULATION_OF_...712	13	1.2421	0.038102	0.26829	1.8485e-06	GOBP_NEGATIVE_REGULATION_OF_VIRAL_ENTRY_INTO_HOST_CELL
APOB	HOFMANN_MYELODYSPLASTIC_SYND...2	5	2.2874	0.043529	0.49203	1.6843e-06	HOFMANN_MYELODYSPLASTIC_SYNDROM_HIGH_RISK_UP
APOB	GOMF_PORIN_ACTIVITY	2	3.6225	0.043603	0.77874	1.6615e-06	GOMF_PORIN_ACTIVITY
APOB	GOBP_NEUTRAL_LIPID_METABOLIC...	98	0.49949	0.041939	0.10731	1.6398e-06	GOBP_NEUTRAL_LIPID_METABOLIC_PROCESS
APOB	GOMF_TRIGLYCERIDE_BINDING	3	2.9635	0.043686	0.63623	1.6131e-06	GOMF_TRIGLYCERIDE_BINDING
APOB	GOBP_REGULATION_OF_INTESTINA...1	5	2.5182	0.047921	0.53992	1.5652e-06	GOBP_REGULATION_OF_INTESTINAL_ABSORPTION
APOB	KIM_LIVER_CANCER_POOR_SURVIV...1	32	0.90101	0.043334	0.19259	1.46e-06	KIM_LIVER_CANCER_POOR_SURVIVAL_DN
APOB	GOBP_B_CELL_MEDIATED_IMMUNITY	111	0.48749	0.043542	0.10416	1.4469e-06	GOBP_B_CELL_MEDIATED_IMMUNITY
APOB	GOBP_STEROL_HOMEOSTASIS	67	0.63324	0.044013	0.13343	1.0494e-06	GOBP_STEROL_HOMEOSTASIS
APOB	GOBP_NEGATIVE_REGULATION_OF_...564	5	2.354	0.044796	0.4925	8.8762e-07	GOBP_NEGATIVE_REGULATION_OF_RECEPTOR_RECYCLING
APOB	PHESSE_TARGETS_OF_APC_AND_MB...2	14	1.2318	0.039211	0.25455	6.5922e-07	PHESSE_TARGETS_OF_APC_AND_MBD2_UP
APOB	ROVERSI_GLIOMA_COPY_NUMBER_UP	67	0.65897	0.045801	0.13425	4.6401e-07	ROVERSI_GLIOMA_COPY_NUMBER_UP
APOB	REACTOME_CHYLOMICRON_CLEARAN...	4	2.7786	0.047297	0.55058	2.2759e-07	REACTOME_CHYLOMICRON_CLEARANCE
APOB	GOBP_TRIGLYCERIDE_RICH_LIPOP...2	5	2.4896	0.047376	0.49281	2.2169e-07	GOBP_TRIGLYCERIDE_RICH_LIPOPROTEIN_PARTICLE_REMODELING
APOB	BIOCARTA_LDL_PATHWAY	5	2.512	0.047803	0.49261	1.7276e-07	BIOCARTA_LDL_PATHWAY
APOB	GOBP_POSITIVE_REGULATION_OF_...549	5	2.5152	0.047864	0.49319	1.7227e-07	GOBP_POSITIVE_REGULATION_OF_NATURAL_KILLER_CELL_MEDIATED_IMMUNE_RESPONSE_TO_TUMOR_CELL
APOB	GOBP_REGULATION_OF_INTESTINA...2	4	3.1705	0.053966	0.61953	1.5689e-07	GOBP_REGULATION_OF_INTESTINAL_LIPID_ABSORPTION
APOB	GOBP_TRIGLYCERIDE_METABOLIC_...	74	0.63521	0.046387	0.12407	1.5497e-07	GOBP_TRIGLYCERIDE_METABOLIC_PROCESS
APOB	REACTOME_VLDL_CLEARANCE	6	2.4835	0.051771	0.4809	1.2235e-07	REACTOME_VLDL_CLEARANCE
APOB	REACTOME_NR1H2_AND_NR1H3_MED...	36	0.98472	0.050226	0.18786	8.0747e-08	REACTOME_NR1H2_AND_NR1H3_MEDIATED_SIGNALING
APOB	GOMF_APOLIPOPROTEIN_BINDING	15	1.4638	0.048229	0.27702	6.4233e-08	GOMF_APOLIPOPROTEIN_BINDING
APOB	ZHENG_FOXP3_TARGETS_IN_THYMU...1	10	1.5825	0.042581	0.29579	4.4669e-08	ZHENG_FOXP3_TARGETS_IN_THYMUS_DN
APOB	GOBP_NEGATIVE_REGULATION_OF_...365	9	1.9837	0.05064	0.36742	3.4074e-08	GOBP_NEGATIVE_REGULATION_OF_LIPOPROTEIN_PARTICLE_CLEARANCE
APOB	REACTOME_VLDL_ASSEMBLY	5	2.8864	0.054928	0.53415	3.3192e-08	REACTOME_VLDL_ASSEMBLY
APOB	GOBP_NATURAL_KILLER_CELL_MED...1	8	2.0188	0.048589	0.37037	2.5529e-08	GOBP_NATURAL_KILLER_CELL_MEDIATED_IMMUNE_RESPONSE_TO_TUMOR_CELL
APOB	GOBP_REGULATION_OF_NATURAL_K...4	8	2.0188	0.048589	0.37037	2.5529e-08	GOBP_REGULATION_OF_NATURAL_KILLER_CELL_MEDIATED_IMMUNE_RESPONSE_TO_TUMOR_CELL
APOB	GOBP_NEGATIVE_REGULATION_OF_...630	9	2.0092	0.05129	0.368	2.4254e-08	GOBP_NEGATIVE_REGULATION_OF_STEROL_TRANSPORT
APOB	WP_FAMILIAL_HYPERLIPIDEMIA_T...4	16	1.5274	0.051974	0.27477	1.3837e-08	WP_FAMILIAL_HYPERLIPIDEMIA_TYPE_4
APOB	GOBP_NEGATIVE_REGULATION_OF_...368	7	2.3293	0.052443	0.41655	1.1457e-08	GOBP_NEGATIVE_REGULATION_OF_LOW_DENSITY_LIPOPROTEIN_PARTICLE_CLEARANCE
APOB	WP_BILE_ACIDS_SYNTHESIS_AND_...	10	1.9651	0.052876	0.34914	9.2743e-09	WP_BILE_ACIDS_SYNTHESIS_AND_ENTEROHEPATIC_CIRCULATION
APOB	GOCC_TRIGLYCERIDE_RICH_PLASM...	13	1.8494	0.056732	0.31486	2.1808e-09	GOCC_TRIGLYCERIDE_RICH_PLASMA_LIPOPROTEIN_PARTICLE
APOB	GOMF_STEROL_TRANSFER_ACTIVITY	17	1.5762	0.055283	0.26748	1.9457e-09	GOMF_STEROL_TRANSFER_ACTIVITY
APOB	GOCC_HIGH_DENSITY_LIPOPROTEI...	16	1.7959	0.06111	0.28984	2.9818e-10	GOCC_HIGH_DENSITY_LIPOPROTEIN_PARTICLE
APOB	WP_STATIN_INHIBITION_OF_CHOL...	21	1.5527	0.06052	0.24058	5.639e-11	WP_STATIN_INHIBITION_OF_CHOLESTEROL_PRODUCTION
APOB	REACTOME_CHYLOMICRON_REMODEL...	3	4.1434	0.06108	0.63584	3.731e-11	REACTOME_CHYLOMICRON_REMODELING
APOB	WP_FAMILIAL_HYPERLIPIDEMIA_T...1	9	2.402	0.061317	0.36685	3.0285e-11	WP_FAMILIAL_HYPERLIPIDEMIA_TYPE_1
APOB	WP_FAMILIAL_HYPERLIPIDEMIA_T...5	9	2.402	0.061317	0.36685	3.0285e-11	WP_FAMILIAL_HYPERLIPIDEMIA_TYPE_5
APOB	GOCC_CHYLOMICRON	7	2.762	0.062187	0.4162	1.6704e-11	GOCC_CHYLOMICRON
APOB	REACTOME_PLASMA_LIPOPROTEIN_...2	56	0.9809	0.062354	0.14691	1.2704e-11	REACTOME_PLASMA_LIPOPROTEIN_ASSEMBLY_REMODELING_AND_CLEARANCE
APOB	GOBP_SUPPRESSION_OF_VIRAL_RE...	10	2.1451	0.057719	0.30558	1.1643e-12	GOBP_SUPPRESSION_OF_VIRAL_RELEASE_BY_HOST
APOB	WP_FAMILIAL_HYPERLIPIDEMIA_T...3	9	2.6347	0.067258	0.36676	3.5694e-13	WP_FAMILIAL_HYPERLIPIDEMIA_TYPE_3
APOB	WP_CHOLESTEROL_METABOLISM	53	1.0898	0.067401	0.14764	8.3019e-14	WP_CHOLESTEROL_METABOLISM
APOB	REACTOME_PLASMA_LIPOPROTEIN_...4	21	1.7751	0.069186	0.24012	7.6426e-14	REACTOME_PLASMA_LIPOPROTEIN_REMODELING
APOB	WP_METABOLIC_PATHWAY_OF_LDL_...	12	2.6385	0.077766	0.31768	5.4448e-17	WP_METABOLIC_PATHWAY_OF_LDL_HDL_AND_TG_INCLUDING_DISEASES
APOB	GOCC_OMEGASOME	4	3.2955	0.056095	0.3922	2.3986e-17	GOCC_OMEGASOME
APOB	GOCC_PROTEIN_LIPID_COMPLEX	28	1.835	0.082566	0.21406	5.6211e-18	GOCC_PROTEIN_LIPID_COMPLEX
APOB	REACTOME_LDL_REMODELING	5	4.3029	0.081883	0.49153	1.1517e-18	REACTOME_LDL_REMODELING
APOB	WP_FAMILIAL_HYPERLIPIDEMIA_T...2	11	2.9927	0.084454	0.33141	9.7162e-20	WP_FAMILIAL_HYPERLIPIDEMIA_TYPE_2
APOB	WP_LIPID_PARTICLES_COMPOSITI...	4	5.7164	0.097302	0.5488	1.3076e-25	WP_LIPID_PARTICLES_COMPOSITION
AST	GOBP_MATURE_B_CELL_DIFFERENT...2	26	0.91935	0.039863	0.20208	2.7119e-06	GOBP_MATURE_B_CELL_DIFFERENTIATION_INVOLVED_IN_IMMUNE_RESPONSE
AST	GOBP_NEGATIVE_REGULATION_OF_...144	2	3.6754	0.044238	0.76397	7.5953e-07	GOBP_NEGATIVE_REGULATION_OF_CHOLESTEROL_METABOLIC_PROCESS
AST	GOBP_2_OXOGLUTARATE_METABOLI...	13	1.578	0.048406	0.28721	1.9951e-08	GOBP_2_OXOGLUTARATE_METABOLIC_PROCESS
BMI	GOMF_ADENYLATE_CYCLASE_ACTIV...2	11	1.5143	0.042731	0.31849	1.0046e-06	GOMF_ADENYLATE_CYCLASE_ACTIVITY
BMI	REACTOME_ADENYLATE_CYCLASE_I...	12	1.4054	0.041421	0.28933	6.0097e-07	REACTOME_ADENYLATE_CYCLASE_INHIBITORY_PATHWAY
BMI	GOBP_RESPONSE_TO_FORSKOLIN	10	1.7203	0.046287	0.33829	1.8607e-07	GOBP_RESPONSE_TO_FORSKOLIN
BMI	GOBP_CAMP_BIOSYNTHETIC_PROCE...	10	1.7721	0.047681	0.33351	5.4635e-08	GOBP_CAMP_BIOSYNTHETIC_PROCESS
BMI	REACTOME_ADENYLATE_CYCLASE_A...	10	1.7669	0.047541	0.33048	4.556e-08	REACTOME_ADENYLATE_CYCLASE_ACTIVATING_PATHWAY
CAL	GOBP_PROTEIN_POLY_ADP_RIBOSY...	6	2.2315	0.046516	0.43984	1.9789e-07	GOBP_PROTEIN_POLY_ADP_RIBOSYLATION
CAL	REACTOME_MET_RECEPTOR_ACTIVA...	4	3.1423	0.053484	0.5357	2.2884e-09	REACTOME_MET_RECEPTOR_ACTIVATION
CHO	GOCC_HIGH_DENSITY_LIPOPROTEI...	16	1.2843	0.043703	0.28486	3.2907e-06	GOCC_HIGH_DENSITY_LIPOPROTEIN_PARTICLE
CHO	GOBP_REGULATION_OF_LOW_DENSI...	12	1.4125	0.041631	0.3126	3.1414e-06	GOBP_REGULATION_OF_LOW_DENSITY_LIPOPROTEIN_PARTICLE_CLEARANCE
CHO	GOCC_LOW_DENSITY_LIPOPROTEIN...	7	1.8585	0.041844	0.40907	2.7943e-06	GOCC_LOW_DENSITY_LIPOPROTEIN_PARTICLE
CHO	WP_FAMILIAL_HYPERLIPIDEMIA_T...1	9	1.6509	0.042144	0.36059	2.3647e-06	WP_FAMILIAL_HYPERLIPIDEMIA_TYPE_1
CHO	WP_FAMILIAL_HYPERLIPIDEMIA_T...5	9	1.6509	0.042144	0.36059	2.3647e-06	WP_FAMILIAL_HYPERLIPIDEMIA_TYPE_5
CHO	GOMF_STEROL_TRANSPORTER_ACTI...	28	0.93557	0.042096	0.2033	2.1122e-06	GOMF_STEROL_TRANSPORTER_ACTIVITY
CHO	GOBP_STEROL_TRANSPORT	96	0.51832	0.043077	0.11131	1.6232e-06	GOBP_STEROL_TRANSPORT
CHO	WP_CHOLESTASIS	18	1.1953	0.043138	0.25546	1.4559e-06	WP_CHOLESTASIS
CHO	GOBP_NEUTRAL_LIPID_METABOLIC...	98	0.49513	0.041573	0.1054	1.3283e-06	GOBP_NEUTRAL_LIPID_METABOLIC_PROCESS
CHO	ROVERSI_GLIOMA_COPY_NUMBER_UP	67	0.62231	0.043253	0.13186	1.1941e-06	ROVERSI_GLIOMA_COPY_NUMBER_UP
CHO	GOBP_NATURAL_KILLER_CELL_MED...1	8	1.7346	0.04175	0.36385	9.4296e-07	GOBP_NATURAL_KILLER_CELL_MEDIATED_IMMUNE_RESPONSE_TO_TUMOR_CELL
CHO	GOBP_REGULATION_OF_NATURAL_K...4	8	1.7346	0.04175	0.36385	9.4296e-07	GOBP_REGULATION_OF_NATURAL_KILLER_CELL_MEDIATED_IMMUNE_RESPONSE_TO_TUMOR_CELL
CHO	WP_BILE_ACIDS_SYNTHESIS_AND_...	10	1.6894	0.045457	0.343	4.2624e-07	WP_BILE_ACIDS_SYNTHESIS_AND_ENTEROHEPATIC_CIRCULATION
CHO	GOBP_POSITIVE_REGULATION_OF_...549	5	2.3887	0.045457	0.48442	4.1373e-07	GOBP_POSITIVE_REGULATION_OF_NATURAL_KILLER_CELL_MEDIATED_IMMUNE_RESPONSE_TO_TUMOR_CELL
CHO	GOBP_ANTIBODY_DEPENDENT_CELL...	3	2.6234	0.038673	0.52776	3.3757e-07	GOBP_ANTIBODY_DEPENDENT_CELLULAR_CYTOTOXICITY
CHO	REACTOME_HDL_REMODELING	5	2.4283	0.04621	0.48372	2.6169e-07	REACTOME_HDL_REMODELING
CHO	REACTOME_NR1H3_NR1H2_REGULAT...	28	1.0865	0.048886	0.21043	1.2317e-07	REACTOME_NR1H3_NR1H2_REGULATE_GENE_EXPRESSION_LINKED_TO_CHOLESTEROL_TRANSPORT_AND_EFFLUX
CHO	GOBP_NEGATIVE_REGULATION_OF_...32	2	3.9729	0.047821	0.76388	1.006e-07	GOBP_NEGATIVE_REGULATION_OF_ASTROCYTE_ACTIVATION
CHO	GOBP_NEGATIVE_REGULATION_OF_...630	9	1.8832	0.048075	0.36146	9.579e-08	GOBP_NEGATIVE_REGULATION_OF_STEROL_TRANSPORT
CHO	GOBP_MEMBRANE_FUSION_INVOLVE...	4	2.8453	0.04843	0.54115	7.4033e-08	GOBP_MEMBRANE_FUSION_INVOLVED_IN_VIRAL_ENTRY_INTO_HOST_CELL
CHO	GOBP_NEGATIVE_REGULATION_OF_...365	9	1.9119	0.048806	0.36088	5.9491e-08	GOBP_NEGATIVE_REGULATION_OF_LIPOPROTEIN_PARTICLE_CLEARANCE
CHO	GOBP_PLASMA_LIPOPROTEIN_PART...	30	1.0212	0.047559	0.19087	4.4644e-08	GOBP_PLASMA_LIPOPROTEIN_PARTICLE_CLEARANCE
CHO	GOMF_APOLIPOPROTEIN_A_I_BIND...	2	4.09	0.049231	0.76428	4.433e-08	GOMF_APOLIPOPROTEIN_A_I_BINDING
CHO	BIOCARTA_FXR_PATHWAY	5	2.6053	0.049578	0.48325	3.5595e-08	BIOCARTA_FXR_PATHWAY
CHO	GOBP_REGULATION_OF_PLASMA_LI...	51	0.80944	0.049113	0.14966	3.2294e-08	GOBP_REGULATION_OF_PLASMA_LIPOPROTEIN_PARTICLE_LEVELS
CHO	GOBP_REGULATION_OF_LIPOPROTE...3	16	1.4875	0.050618	0.27063	1.9708e-08	GOBP_REGULATION_OF_LIPOPROTEIN_PARTICLE_CLEARANCE
CHO	GOBP_APOLIPOPROTEIN_A_I_MEDI...	3	3.9662	0.058467	0.71757	1.6574e-08	GOBP_APOLIPOPROTEIN_A_I_MEDIATED_SIGNALING_PATHWAY
CHO	GOBP_REVERSE_CHOLESTEROL_TRA...	10	1.9135	0.051488	0.34218	1.1434e-08	GOBP_REVERSE_CHOLESTEROL_TRANSPORT
CHO	REACTOME_NR1H2_AND_NR1H3_MED...	36	1.0626	0.054197	0.18447	4.2909e-09	REACTOME_NR1H2_AND_NR1H3_MEDIATED_SIGNALING
CHO	WP_FAMILIAL_HYPERLIPIDEMIA_T...3	9	2.077	0.053021	0.36046	4.2432e-09	WP_FAMILIAL_HYPERLIPIDEMIA_TYPE_3
CHO	GOBP_NEGATIVE_REGULATION_OF_...368	7	2.3902	0.053815	0.40907	2.6229e-09	GOBP_NEGATIVE_REGULATION_OF_LOW_DENSITY_LIPOPROTEIN_PARTICLE_CLEARANCE
CHO	REACTOME_CHYLOMICRON_CLEARAN...	4	3.2131	0.054692	0.54055	1.4234e-09	REACTOME_CHYLOMICRON_CLEARANCE
CHO	GOBP_LIPID_HOMEOSTASIS	114	0.61482	0.055645	0.099947	3.9487e-10	GOBP_LIPID_HOMEOSTASIS
CHO	REACTOME_PLASMA_LIPOPROTEIN_...4	21	1.4635	0.057041	0.23598	2.8748e-10	REACTOME_PLASMA_LIPOPROTEIN_REMODELING
CHO	GOBP_HIGH_DENSITY_LIPOPROTEI...2	4	3.4238	0.058278	0.54026	1.2067e-10	GOBP_HIGH_DENSITY_LIPOPROTEIN_PARTICLE_CLEARANCE
CHO	GOCC_PROTEIN_LIPID_COMPLEX	28	1.3591	0.061153	0.21049	5.5271e-11	GOCC_PROTEIN_LIPID_COMPLEX
CHO	REACTOME_PLASMA_LIPOPROTEIN_...2	56	0.93189	0.059238	0.14431	5.4994e-11	REACTOME_PLASMA_LIPOPROTEIN_ASSEMBLY_REMODELING_AND_CLEARANCE
CHO	GOMF_STEROL_TRANSFER_ACTIVITY	17	1.7277	0.060598	0.26262	2.4616e-11	GOMF_STEROL_TRANSFER_ACTIVITY
CHO	GOMF_APOLIPOPROTEIN_BINDING	15	1.8672	0.061521	0.27188	3.4092e-12	GOMF_APOLIPOPROTEIN_BINDING
CHO	WP_FAMILIAL_HYPERLIPIDEMIA_T...2	11	2.2385	0.06317	0.32591	3.3872e-12	WP_FAMILIAL_HYPERLIPIDEMIA_TYPE_2
CHO	GOBP_PHOSPHOLIPID_HOMEOSTASIS	14	1.9894	0.063329	0.28882	2.9532e-12	GOBP_PHOSPHOLIPID_HOMEOSTASIS
CHO	GOBP_STEROL_HOMEOSTASIS	67	0.91698	0.063734	0.13092	1.3022e-12	GOBP_STEROL_HOMEOSTASIS
CHO	WP_STATIN_INHIBITION_OF_CHOL...	21	1.7857	0.069599	0.23615	2.1233e-14	WP_STATIN_INHIBITION_OF_CHOLESTEROL_PRODUCTION
CHO	REACTOME_LDL_REMODELING	5	3.813	0.07256	0.48301	1.5753e-15	REACTOME_LDL_REMODELING
CHO	WP_CHOLESTEROL_METABOLISM	53	1.1805	0.07301	0.14494	2.0719e-16	WP_CHOLESTEROL_METABOLISM
CHO	WP_LIPID_PARTICLES_COMPOSITI...	4	4.4019	0.074927	0.53985	1.9177e-16	WP_LIPID_PARTICLES_COMPOSITION
CHO	WP_METABOLIC_PATHWAY_OF_LDL_...	12	3.3943	0.10004	0.31143	7.6283e-28	WP_METABOLIC_PATHWAY_OF_LDL_HDL_AND_TG_INCLUDING_DISEASES
CREA	LI_WILMS_TUMOR_VS_FETAL_KIDN...3	39	0.77216	0.040986	0.17132	3.3145e-06	LI_WILMS_TUMOR_VS_FETAL_KIDNEY_2_DN
CREA	WP_PROXIMAL_TUBULE_TRANSPORT	44	0.76558	0.043156	0.16851	2.7946e-06	WP_PROXIMAL_TUBULE_TRANSPORT
CREA	GOCC_APOLIPOPROTEIN_B_MRNA_E...	5	2.2462	0.042743	0.49003	2.3034e-06	GOCC_APOLIPOPROTEIN_B_MRNA_EDITING_ENZYME_COMPLEX
CREA	MYLLYKANGAS_AMPLIFICATION_HO...1	8	1.8714	0.04504	0.39859	1.3458e-06	MYLLYKANGAS_AMPLIFICATION_HOT_SPOT_12
CREA	GOBP_REGULATION_OF_DNA_DEMET...	10	1.3518	0.036373	0.27923	6.5215e-07	GOBP_REGULATION_OF_DNA_DEMETHYLATION
CREA	GOBP_REGULATION_OF_HEMATOPOI...2	11	1.6271	0.045913	0.33248	5.0057e-07	GOBP_REGULATION_OF_HEMATOPOIETIC_STEM_CELL_DIFFERENTIATION
CREA	GOBP_RESPONSE_TO_TOXIC_SUBST...	162	0.4226	0.045513	0.085087	3.448e-07	GOBP_RESPONSE_TO_TOXIC_SUBSTANCE
CRP	LOPEZ_MESOTHELIOMA_SURVIVAL_...3	4	2.5088	0.042702	0.54881	2.445e-06	LOPEZ_MESOTHELIOMA_SURVIVAL_OVERALL_UP
CRP	GOBP_ACYLGLYCEROL_HOMEOSTASIS	23	1.0547	0.043018	0.22464	1.3445e-06	GOBP_ACYLGLYCEROL_HOMEOSTASIS
CRP	GOBP_VERY_LOW_DENSITY_LIPOPR...2	4	2.5912	0.044105	0.54911	1.1975e-06	GOBP_VERY_LOW_DENSITY_LIPOPROTEIN_PARTICLE_CLEARANCE
CRP	REACTOME_PLASMA_LIPOPROTEIN_...1	14	1.4256	0.045377	0.30138	1.1334e-06	REACTOME_PLASMA_LIPOPROTEIN_ASSEMBLY
CRP	GOCC_TRIGLYCERIDE_RICH_PLASM...	14	1.4994	0.047729	0.30164	3.3717e-07	GOCC_TRIGLYCERIDE_RICH_PLASMA_LIPOPROTEIN_PARTICLE
CRP	LOPEZ_MESOTHELIOMA_SURVIVAL_...4	8	1.8571	0.044695	0.36838	2.3431e-07	LOPEZ_MESOTHELIOMA_SURVIVAL_UP
CRP	GOCC_CHYLOMICRON	8	1.9845	0.047763	0.38806	1.599e-07	GOCC_CHYLOMICRON
CRP	REACTOME_NECTIN_NECL_TRANS_H...	6	2.3306	0.048581	0.44874	1.0459e-07	REACTOME_NECTIN_NECL_TRANS_HETERODIMERIZATION
CRP	GOBP_NAD_TRANSPORT	2	4.4736	0.053847	0.77532	4.0497e-09	GOBP_NAD_TRANSPORT
CRP	GOMF_PHOSPHATIDYLCHOLINE_STE...	3	3.894	0.057401	0.63368	4.1104e-10	GOMF_PHOSPHATIDYLCHOLINE_STEROL_O_ACYLTRANSFERASE_ACTIVATOR_ACTIVITY
DBP	GOBP_REGULATION_OF_HIGH_VOLT...	10	1.5721	0.042299	0.32612	7.2383e-07	GOBP_REGULATION_OF_HIGH_VOLTAGE_GATED_CALCIUM_CHANNEL_ACTIVITY
GGT	REACTOME_LTC4_CYSLTR_MEDIATE...	4	2.4977	0.042512	0.53729	1.687e-06	REACTOME_LTC4_CYSLTR_MEDIATED_IL4_PRODUCTION
GGT	GOBP_MEMBRANE_PROTEIN_ECTODO...	34	0.91782	0.045496	0.19214	8.9988e-07	GOBP_MEMBRANE_PROTEIN_ECTODOMAIN_PROTEOLYSIS
GGT	REACTOME_REGULATION_OF_GENE_...2	20	1.2287	0.046736	0.24499	2.6838e-07	REACTOME_REGULATION_OF_GENE_EXPRESSION_IN_BETA_CELLS
GGT	GOBP_EXOCYST_LOCALIZATION	4	2.8336	0.04823	0.56165	2.2954e-07	GOBP_EXOCYST_LOCALIZATION
GGT	NIKOLSKY_BREAST_CANCER_1Q21_...	17	1.767	0.061973	0.29179	7.1749e-10	NIKOLSKY_BREAST_CANCER_1Q21_AMPLICON
HBA1C	REACTOME_INTESTINAL_ABSORPTI...	3	2.9262	0.043134	0.64192	2.5999e-06	REACTOME_INTESTINAL_ABSORPTION
HBA1C	WP_HFE_EFFECT_ON_HEPCIDIN_PR...	4	2.8455	0.048432	0.55558	1.5355e-07	WP_HFE_EFFECT_ON_HEPCIDIN_PRODUCTION
HBA1C	VALK_AML_CLUSTER_7	18	1.3842	0.049955	0.26195	6.4065e-08	VALK_AML_CLUSTER_7
HDL	GOMF_STEROL_BINDING	45	0.74365	0.042391	0.16471	3.1949e-06	GOMF_STEROL_BINDING
HDL	GOBP_INTERMEMBRANE_LIPID_TRA...	39	0.80342	0.042645	0.17783	3.1505e-06	GOBP_INTERMEMBRANE_LIPID_TRANSFER
HDL	GOMF_LIPID_TRANSFER_ACTIVITY	39	0.80342	0.042645	0.17783	3.1505e-06	GOMF_LIPID_TRANSFER_ACTIVITY
HDL	GOBP_RESPONSE_TO_INTERLEUKIN...7	4	2.8144	0.047903	0.61727	2.5883e-06	GOBP_RESPONSE_TO_INTERLEUKIN_3
HDL	GOBP_STEROID_CATABOLIC_PROCE...	16	1.2748	0.043378	0.27857	2.3883e-06	GOBP_STEROID_CATABOLIC_PROCESS
HDL	GOMF_PORIN_ACTIVITY	2	3.6343	0.043744	0.78689	1.9497e-06	GOMF_PORIN_ACTIVITY
HDL	GOBP_REGULATION_OF_STEROID_M...	66	0.58829	0.040582	0.12712	1.8656e-06	GOBP_REGULATION_OF_STEROID_METABOLIC_PROCESS
HDL	GOMF_NUCLEAR_RECEPTOR_ACTIVI...	39	0.80186	0.042563	0.17308	1.8194e-06	GOMF_NUCLEAR_RECEPTOR_ACTIVITY
HDL	REACTOME_PLASMA_LIPOPROTEIN_...3	31	0.92773	0.043917	0.19916	1.6106e-06	REACTOME_PLASMA_LIPOPROTEIN_CLEARANCE
HDL	GOMF_CHOLESTEROL_BINDING	38	0.84149	0.044091	0.17971	1.4309e-06	GOMF_CHOLESTEROL_BINDING
HDL	GOBP_REGULATION_OF_LIPID_TRA...1	103	0.52333	0.045038	0.1109	1.1986e-06	GOBP_REGULATION_OF_LIPID_TRANSPORT
HDL	REACTOME_ASSEMBLY_OF_ACTIVE_...	12	1.5249	0.044944	0.32125	1.0432e-06	REACTOME_ASSEMBLY_OF_ACTIVE_LPL_AND_LIPC_LIPASE_COMPLEXES
HDL	GOBP_REGULATION_OF_MACROPHAG...4	24	1.0861	0.045249	0.22391	6.2247e-07	GOBP_REGULATION_OF_MACROPHAGE_DERIVED_FOAM_CELL_DIFFERENTIATION
HDL	GOBP_HIGH_DENSITY_LIPOPROTEI...1	7	2.05	0.046154	0.42021	5.4037e-07	GOBP_HIGH_DENSITY_LIPOPROTEIN_PARTICLE_ASSEMBLY
HDL	GOBP_FOAM_CELL_DIFFERENTIATI...	29	1.0037	0.045957	0.20423	4.5047e-07	GOBP_FOAM_CELL_DIFFERENTIATION
HDL	GOBP_POSITIVE_REGULATION_OF_...445	67	0.67093	0.046631	0.13605	4.127e-07	GOBP_POSITIVE_REGULATION_OF_LIPID_TRANSPORT
HDL	REACTOME_NR1H3_NR1H2_REGULAT...	29	1.0561	0.048356	0.21255	3.413e-07	REACTOME_NR1H3_NR1H2_REGULATE_GENE_EXPRESSION_LINKED_TO_CHOLESTEROL_TRANSPORT_AND_EFFLUX
HDL	GOMF_PHOSPHATIDYLSERINE_1_AC...	8	1.9381	0.046645	0.3896	3.3121e-07	GOMF_PHOSPHATIDYLSERINE_1_ACYLHYDROLASE_ACTIVITY
HDL	GOBP_CHOLESTEROL_STORAGE	15	1.3851	0.045635	0.27658	2.7852e-07	GOBP_CHOLESTEROL_STORAGE
HDL	GOBP_LIPID_LOCALIZATION	388	0.28508	0.047121	0.056792	2.6196e-07	GOBP_LIPID_LOCALIZATION
HDL	GOBP_POSITIVE_REGULATION_OF_...178	5	2.537	0.048276	0.49814	1.787e-07	GOBP_POSITIVE_REGULATION_OF_COA_TRANSFERASE_ACTIVITY
HDL	GOBP_REGULATION_OF_COA_TRANS...	5	2.537	0.048276	0.49814	1.787e-07	GOBP_REGULATION_OF_COA_TRANSFERASE_ACTIVITY
HDL	GOBP_POSITIVE_REGULATION_OF_...161	22	1.2697	0.050649	0.24581	1.2177e-07	GOBP_POSITIVE_REGULATION_OF_CHOLESTEROL_EFFLUX
HDL	REACTOME_CHYLOMICRON_ASSEMBLY	6	2.3643	0.049283	0.45441	9.9501e-08	REACTOME_CHYLOMICRON_ASSEMBLY
HDL	REACTOME_METABOLISM_OF_FAT_S...	33	0.99758	0.048719	0.18898	6.6069e-08	REACTOME_METABOLISM_OF_FAT_SOLUBLE_VITAMINS
HDL	GOMF_TRIGLYCERIDE_BINDING	3	3.4452	0.050786	0.64279	4.2347e-08	GOMF_TRIGLYCERIDE_BINDING
HDL	GOMF_PROTEIN_LIPID_COMPLEX_B...	22	1.2418	0.049539	0.23113	3.9365e-08	GOMF_PROTEIN_LIPID_COMPLEX_BINDING
HDL	GOBP_NEGATIVE_REGULATION_OF_...382	11	1.8831	0.053138	0.34728	2.9935e-08	GOBP_NEGATIVE_REGULATION_OF_MACROPHAGE_DERIVED_FOAM_CELL_DIFFERENTIATION
HDL	GOBP_REGULATION_OF_CHOLESTER...2	31	1.1334	0.053653	0.2088	2.8964e-08	GOBP_REGULATION_OF_CHOLESTEROL_EFFLUX
HDL	GOBP_REGULATION_OF_LIPID_LOC...	125	0.55103	0.0522	0.10041	2.0707e-08	GOBP_REGULATION_OF_LIPID_LOCALIZATION
HDL	GOBP_TRIGLYCERIDE_RICH_LIPOP...1	3	3.5309	0.052049	0.643	2.0317e-08	GOBP_TRIGLYCERIDE_RICH_LIPOPROTEIN_PARTICLE_CLEARANCE
HDL	GOCC_TRIGLYCERIDE_RICH_PLASM...	14	1.7001	0.054118	0.30598	1.4036e-08	GOCC_TRIGLYCERIDE_RICH_PLASMA_LIPOPROTEIN_PARTICLE
HDL	GOBP_REGULATION_OF_STEROL_TR...	47	0.95117	0.055409	0.16873	8.8231e-09	GOBP_REGULATION_OF_STEROL_TRANSPORT
HDL	WP_FAMILIAL_HYPERLIPIDEMIA_T...4	16	1.574	0.053558	0.27764	7.3183e-09	WP_FAMILIAL_HYPERLIPIDEMIA_TYPE_4
HDL	GOBP_PROTEIN_LIPID_COMPLEX_A...	19	1.45	0.05376	0.2553	6.8898e-09	GOBP_PROTEIN_LIPID_COMPLEX_ASSEMBLY
HDL	GOBP_CHOLESTEROL_CATABOLIC_P...	8	2.2711	0.054661	0.39367	4.0722e-09	GOBP_CHOLESTEROL_CATABOLIC_PROCESS
HDL	REACTOME_CHYLOMICRON_CLEARAN...	5	2.9129	0.05543	0.49743	2.4277e-09	REACTOME_CHYLOMICRON_CLEARANCE
HDL	WP_FAMILIAL_HYPERLIPIDEMIA_T...2	11	1.981	0.0559	0.33547	1.8064e-09	WP_FAMILIAL_HYPERLIPIDEMIA_TYPE_2
HDL	GOBP_NEGATIVE_REGULATION_OF_...144	2	4.6622	0.056116	0.78573	1.5194e-09	GOBP_NEGATIVE_REGULATION_OF_CHOLESTEROL_METABOLIC_PROCESS
HDL	GOCC_PROTEIN_LIPID_COMPLEX	29	1.2745	0.058356	0.21264	1.0519e-09	GOCC_PROTEIN_LIPID_COMPLEX
HDL	GOBP_REGULATION_OF_CDC42_PRO...	6	2.7328	0.056965	0.45423	9.1468e-10	GOBP_REGULATION_OF_CDC42_PROTEIN_SIGNAL_TRANSDUCTION
HDL	GOBP_PHOSPHOLIPID_EFFLUX	9	2.2398	0.057175	0.37072	7.824e-10	GOBP_PHOSPHOLIPID_EFFLUX
HDL	GOBP_LOW_DENSITY_LIPOPROTEIN...2	10	2.1382	0.057532	0.35267	6.8651e-10	GOBP_LOW_DENSITY_LIPOPROTEIN_PARTICLE_REMODELING
HDL	GOMF_STEROL_TRANSPORTER_ACTI...	29	1.2568	0.057547	0.20545	4.8893e-10	GOMF_STEROL_TRANSPORTER_ACTIVITY
HDL	GOMF_PHOSPHATIDYLCHOLINE_STE...	3	3.9889	0.058801	0.64294	2.8291e-10	GOMF_PHOSPHATIDYLCHOLINE_STEROL_O_ACYLTRANSFERASE_ACTIVATOR_ACTIVITY
HDL	GOBP_POSITIVE_REGULATION_OF_...442	85	0.75024	0.058692	0.12051	2.472e-10	GOBP_POSITIVE_REGULATION_OF_LIPID_LOCALIZATION
HDL	WP_CHOLESTEROL_METABOLISM	54	0.93609	0.058435	0.14795	1.29e-10	WP_CHOLESTEROL_METABOLISM
HDL	GOCC_CHYLOMICRON	8	2.5028	0.060237	0.39353	1.0414e-10	GOCC_CHYLOMICRON
HDL	GOBP_SECONDARY_ALCOHOL_METAB...	100	0.69585	0.059013	0.10932	1.0052e-10	GOBP_SECONDARY_ALCOHOL_METABOLIC_PROCESS
HDL	GOBP_STEROID_METABOLIC_PROCE...	231	0.45411	0.058252	0.071156	9.0373e-11	GOBP_STEROID_METABOLIC_PROCESS
HDL	GOBP_LIPID_HOMEOSTASIS	115	0.6554	0.059574	0.10238	7.9555e-11	GOBP_LIPID_HOMEOSTASIS
HDL	REACTOME_PLASMA_LIPOPROTEIN_...1	14	2.029	0.064588	0.30554	1.6194e-11	REACTOME_PLASMA_LIPOPROTEIN_ASSEMBLY
HDL	GOBP_CHOLESTEROL_EFFLUX	43	1.1731	0.065376	0.17492	1.0358e-11	GOBP_CHOLESTEROL_EFFLUX
HDL	GOBP_POSITIVE_REGULATION_OF_...768	30	1.4237	0.066299	0.21144	8.645e-12	GOBP_POSITIVE_REGULATION_OF_STEROL_TRANSPORT
HDL	GOBP_STEROL_TRANSPORT	97	0.77649	0.064864	0.11382	4.6766e-12	GOBP_STEROL_TRANSPORT
HDL	GOMF_STEROL_TRANSFER_ACTIVITY	18	1.7979	0.064884	0.26253	3.8971e-12	GOMF_STEROL_TRANSFER_ACTIVITY
HDL	GOBP_STEROL_METABOLIC_PROCESS	109	0.73114	0.064715	0.10479	1.5754e-12	GOBP_STEROL_METABOLIC_PROCESS
HDL	GOBP_REGULATION_OF_PLASMA_LI...	52	1.0873	0.066608	0.15241	5.1287e-13	GOBP_REGULATION_OF_PLASMA_LIPOPROTEIN_PARTICLE_LEVELS
HDL	REACTOME_HDL_REMODELING	6	3.2674	0.068107	0.45387	3.1955e-13	REACTOME_HDL_REMODELING
HDL	GOCC_HIGH_DENSITY_LIPOPROTEI...	17	2.0449	0.071722	0.28313	2.6861e-13	GOCC_HIGH_DENSITY_LIPOPROTEIN_PARTICLE
HDL	GOBP_HIGH_DENSITY_LIPOPROTEI...2	5	3.5971	0.06845	0.49695	2.3943e-13	GOBP_HIGH_DENSITY_LIPOPROTEIN_PARTICLE_CLEARANCE
HDL	WP_FAMILIAL_HYPERLIPIDEMIA_T...1	9	2.8489	0.072723	0.37048	7.8766e-15	WP_FAMILIAL_HYPERLIPIDEMIA_TYPE_1
HDL	WP_FAMILIAL_HYPERLIPIDEMIA_T...5	9	2.8489	0.072723	0.37048	7.8766e-15	WP_FAMILIAL_HYPERLIPIDEMIA_TYPE_5
HDL	REACTOME_PLASMA_LIPOPROTEIN_...2	57	1.1423	0.073255	0.14708	4.3172e-15	REACTOME_PLASMA_LIPOPROTEIN_ASSEMBLY_REMODELING_AND_CLEARANCE
HDL	REACTOME_PLASMA_LIPOPROTEIN_...4	22	1.8625	0.074297	0.237	2.0891e-15	REACTOME_PLASMA_LIPOPROTEIN_REMODELING
HDL	GOMF_APOLIPOPROTEIN_A_I_BIND...	2	6.2013	0.074641	0.78533	1.546e-15	GOMF_APOLIPOPROTEIN_A_I_BINDING
HDL	GOBP_STEROL_HOMEOSTASIS	68	1.1006	0.077061	0.13363	9.6906e-17	GOBP_STEROL_HOMEOSTASIS
HDL	GOBP_ACYLGLYCEROL_HOMEOSTASIS	23	1.9205	0.078331	0.22751	1.7257e-17	GOBP_ACYLGLYCEROL_HOMEOSTASIS
HDL	WP_LIPID_PARTICLES_COMPOSITI...	5	4.2639	0.081138	0.49667	5.0444e-18	WP_LIPID_PARTICLES_COMPOSITION
HDL	WP_STATIN_INHIBITION_OF_CHOL...	22	2.1388	0.085318	0.23718	1.0923e-19	WP_STATIN_INHIBITION_OF_CHOLESTEROL_PRODUCTION
HDL	REACTOME_CHYLOMICRON_REMODEL...	4	5.2034	0.088565	0.55535	4.2206e-21	REACTOME_CHYLOMICRON_REMODELING
HDL	WP_FAMILIAL_HYPERLIPIDEMIA_T...3	10	3.4389	0.092527	0.35101	6.9031e-23	WP_FAMILIAL_HYPERLIPIDEMIA_TYPE_3
HDL	GOBP_PROTEIN_LIPID_COMPLEX_S...	33	1.9424	0.094861	0.19574	1.9799e-23	GOBP_PROTEIN_LIPID_COMPLEX_SUBUNIT_ORGANIZATION
HDL	GOBP_PROTEIN_CONTAINING_COMP...4	21	2.5196	0.098202	0.24711	1.2679e-24	GOBP_PROTEIN_CONTAINING_COMPLEX_REMODELING
HDL	GOBP_TRIGLYCERIDE_RICH_LIPOP...2	6	4.74	0.098803	0.45312	8.2112e-26	GOBP_TRIGLYCERIDE_RICH_LIPOPROTEIN_PARTICLE_REMODELING
HDL	GOBP_HIGH_DENSITY_LIPOPROTEI...3	10	3.7686	0.1014	0.35097	4.3658e-27	GOBP_HIGH_DENSITY_LIPOPROTEIN_PARTICLE_REMODELING
HDL	WP_METABOLIC_PATHWAY_OF_LDL_...	13	3.3617	0.10312	0.30783	6.0037e-28	WP_METABOLIC_PATHWAY_OF_LDL_HDL_AND_TG_INCLUDING_DISEASES
HDL	GOBP_REVERSE_CHOLESTEROL_TRA...	11	3.8993	0.11003	0.33433	1.3962e-31	GOBP_REVERSE_CHOLESTEROL_TRANSPORT
IGF1	KOMMAGANI_TP63_GAMMA_TARGETS	8	1.8353	0.044171	0.39955	2.2004e-06	KOMMAGANI_TP63_GAMMA_TARGETS
IGF1	GOBP_INTRACELLULAR_MONOATOMI...2	372	0.27248	0.044126	0.059097	2.0249e-06	GOBP_INTRACELLULAR_MONOATOMIC_ION_HOMEOSTASIS
IGF1	GOMF_HISTONE_H3K4_METHYLTRAN...	17	1.2523	0.043922	0.25512	4.6409e-07	GOMF_HISTONE_H3K4_METHYLTRANSFERASE_ACTIVITY
IGF1	GOBP_FIBROBLAST_APOPTOTIC_PR...	18	1.2866	0.046432	0.26008	3.8151e-07	GOBP_FIBROBLAST_APOPTOTIC_PROCESS
IGF1	GOMF_HISTONE_H3K36_METHYLTRA...	12	1.5437	0.045496	0.29552	8.9056e-08	GOMF_HISTONE_H3K36_METHYLTRANSFERASE_ACTIVITY
IGF1	GOMF_HISTONE_H4_METHYLTRANSF...	12	1.5685	0.046228	0.29236	4.1148e-08	GOMF_HISTONE_H4_METHYLTRANSFERASE_ACTIVITY
IGF1	GOMF_HISTONE_H4K20_METHYLTRA...	8	2.1179	0.050973	0.34186	2.9973e-10	GOMF_HISTONE_H4K20_METHYLTRANSFERASE_ACTIVITY
IGF1	GOBP_HISTONE_H3_K4_MONOMETHY...	6	2.5195	0.052518	0.378	1.3719e-11	GOBP_HISTONE_H3_K4_MONOMETHYLATION
IGF1	GOBP_CELL_PROLIFERATION_IN_B...	7	2.38	0.053584	0.35015	5.5631e-12	GOBP_CELL_PROLIFERATION_IN_BONE_MARROW
IGF1	GOMF_HISTONE_H3K4_MONOMETHYL...	6	2.5751	0.053678	0.37798	4.9888e-12	GOMF_HISTONE_H3K4_MONOMETHYLTRANSFERASE_ACTIVITY
IGF1	GOBP_PEPTIDYL_LYSINE_MONOMET...	8	2.4679	0.059397	0.35837	2.986e-12	GOBP_PEPTIDYL_LYSINE_MONOMETHYLATION
IGF1	GOMF_HISTONE_H4K20_MONOMETHY...	6	2.6183	0.054578	0.37815	2.2961e-12	GOMF_HISTONE_H4K20_MONOMETHYLTRANSFERASE_ACTIVITY
IGF1	GOBP_HISTONE_H3_K4_DIMETHYLA...	4	3.3111	0.056357	0.4289	6.2378e-15	GOBP_HISTONE_H3_K4_DIMETHYLATION
LDL	GOMF_STEROL_TRANSPORTER_ACTI...	28	0.91753	0.041285	0.2034	3.2543e-06	GOMF_STEROL_TRANSPORTER_ACTIVITY
LDL	GOBP_REGULATION_OF_INTESTINA...1	5	2.3955	0.045585	0.53055	3.1927e-06	GOBP_REGULATION_OF_INTESTINAL_ABSORPTION
LDL	GOBP_LIPID_HOMEOSTASIS	114	0.45214	0.040921	0.10006	3.1377e-06	GOBP_LIPID_HOMEOSTASIS
LDL	REACTOME_NECTIN_NECL_TRANS_H...	6	2.0347	0.042413	0.44287	2.1918e-06	REACTOME_NECTIN_NECL_TRANS_HETERODIMERIZATION
LDL	REACTOME_NR1H3_NR1H2_REGULAT...	28	0.98365	0.044259	0.21056	1.5098e-06	REACTOME_NR1H3_NR1H2_REGULATE_GENE_EXPRESSION_LINKED_TO_CHOLESTEROL_TRANSPORT_AND_EFFLUX
LDL	WP_FAMILIAL_HYPERLIPIDEMIA_T...4	16	1.2629	0.042975	0.27008	1.476e-06	WP_FAMILIAL_HYPERLIPIDEMIA_TYPE_4
LDL	GOCC_CHYLOMICRON	7	1.9497	0.043896	0.40929	9.6132e-07	GOCC_CHYLOMICRON
LDL	GOBP_STEROL_HOMEOSTASIS	67	0.62567	0.043487	0.13111	9.2122e-07	GOBP_STEROL_HOMEOSTASIS
LDL	GOCC_TRIGLYCERIDE_RICH_PLASM...	13	1.492	0.045769	0.30951	7.2386e-07	GOCC_TRIGLYCERIDE_RICH_PLASMA_LIPOPROTEIN_PARTICLE
LDL	REACTOME_VLDL_CLEARANCE	6	2.2904	0.047743	0.47259	6.3579e-07	REACTOME_VLDL_CLEARANCE
LDL	GOCC_LOW_DENSITY_LIPOPROTEIN...	7	2.0034	0.045106	0.40922	4.954e-07	GOCC_LOW_DENSITY_LIPOPROTEIN_PARTICLE
LDL	GOBP_MEMBRANE_FUSION_INVOLVE...	4	2.6549	0.045189	0.54148	4.7759e-07	GOBP_MEMBRANE_FUSION_INVOLVED_IN_VIRAL_ENTRY_INTO_HOST_CELL
LDL	REACTOME_CHYLOMICRON_CLEARAN...	4	2.6765	0.045558	0.54102	3.8108e-07	REACTOME_CHYLOMICRON_CLEARANCE
LDL	GOBP_NEGATIVE_REGULATION_OF_...630	9	1.8015	0.045989	0.36166	3.1979e-07	GOBP_NEGATIVE_REGULATION_OF_STEROL_TRANSPORT
LDL	GOBP_PHOSPHOLIPID_HOMEOSTASIS	14	1.4526	0.04624	0.2892	2.5783e-07	GOBP_PHOSPHOLIPID_HOMEOSTASIS
LDL	WP_BILE_ACIDS_SYNTHESIS_AND_...	10	1.7423	0.04688	0.34314	1.9392e-07	WP_BILE_ACIDS_SYNTHESIS_AND_ENTEROHEPATIC_CIRCULATION
LDL	GOBP_NATURAL_KILLER_CELL_MED...1	8	1.8596	0.044757	0.36397	1.6416e-07	GOBP_NATURAL_KILLER_CELL_MEDIATED_IMMUNE_RESPONSE_TO_TUMOR_CELL
LDL	GOBP_REGULATION_OF_NATURAL_K...4	8	1.8596	0.044757	0.36397	1.6416e-07	GOBP_REGULATION_OF_NATURAL_KILLER_CELL_MEDIATED_IMMUNE_RESPONSE_TO_TUMOR_CELL
LDL	GOBP_NEGATIVE_REGULATION_OF_...365	9	1.8584	0.047442	0.36107	1.3418e-07	GOBP_NEGATIVE_REGULATION_OF_LIPOPROTEIN_PARTICLE_CLEARANCE
LDL	GOBP_POSITIVE_REGULATION_OF_...549	5	2.4953	0.047485	0.4846	1.3268e-07	GOBP_POSITIVE_REGULATION_OF_NATURAL_KILLER_CELL_MEDIATED_IMMUNE_RESPONSE_TO_TUMOR_CELL
LDL	GOBP_REGULATION_OF_INTESTINA...2	4	3.2032	0.054524	0.60872	7.2266e-08	GOBP_REGULATION_OF_INTESTINAL_LIPID_ABSORPTION
LDL	WP_FAMILIAL_HYPERLIPIDEMIA_T...1	9	1.9495	0.049765	0.36065	3.2892e-08	WP_FAMILIAL_HYPERLIPIDEMIA_TYPE_1
LDL	WP_FAMILIAL_HYPERLIPIDEMIA_T...5	9	1.9495	0.049765	0.36065	3.2892e-08	WP_FAMILIAL_HYPERLIPIDEMIA_TYPE_5
LDL	GOCC_OMEGASOME	4	2.0966	0.035686	0.38597	2.8359e-08	GOCC_OMEGASOME
LDL	REACTOME_PLASMA_LIPOPROTEIN_...2	56	0.79077	0.050268	0.14444	2.2295e-08	REACTOME_PLASMA_LIPOPROTEIN_ASSEMBLY_REMODELING_AND_CLEARANCE
LDL	GOMF_APOLIPOPROTEIN_BINDING	15	1.4911	0.049131	0.27218	2.1844e-08	GOMF_APOLIPOPROTEIN_BINDING
LDL	REACTOME_NR1H2_AND_NR1H3_MED...	36	1.0173	0.051888	0.18457	1.8102e-08	REACTOME_NR1H2_AND_NR1H3_MEDIATED_SIGNALING
LDL	GOCC_HIGH_DENSITY_LIPOPROTEI...	16	1.676	0.05703	0.28484	2.052e-09	GOCC_HIGH_DENSITY_LIPOPROTEIN_PARTICLE
LDL	GOBP_NEGATIVE_REGULATION_OF_...368	7	2.4189	0.05446	0.40925	1.7473e-09	GOBP_NEGATIVE_REGULATION_OF_LOW_DENSITY_LIPOPROTEIN_PARTICLE_CLEARANCE
LDL	WP_FAMILIAL_HYPERLIPIDEMIA_T...3	9	2.1579	0.055086	0.36059	1.1142e-09	WP_FAMILIAL_HYPERLIPIDEMIA_TYPE_3
LDL	REACTOME_PLASMA_LIPOPROTEIN_...4	21	1.4616	0.056967	0.23609	3.0825e-10	REACTOME_PLASMA_LIPOPROTEIN_REMODELING
LDL	GOMF_STEROL_TRANSFER_ACTIVITY	17	1.7333	0.060794	0.26274	2.1776e-11	GOMF_STEROL_TRANSFER_ACTIVITY
LDL	WP_STATIN_INHIBITION_OF_CHOL...	21	1.5864	0.061833	0.23637	1.0019e-11	WP_STATIN_INHIBITION_OF_CHOLESTEROL_PRODUCTION
LDL	WP_CHOLESTEROL_METABOLISM	53	1.0714	0.066265	0.14507	8.0514e-14	WP_CHOLESTEROL_METABOLISM
LDL	WP_FAMILIAL_HYPERLIPIDEMIA_T...2	11	2.5107	0.07085	0.32592	7.0883e-15	WP_FAMILIAL_HYPERLIPIDEMIA_TYPE_2
LDL	WP_METABOLIC_PATHWAY_OF_LDL_...	12	2.4326	0.071698	0.31225	3.5815e-15	WP_METABOLIC_PATHWAY_OF_LDL_HDL_AND_TG_INCLUDING_DISEASES
LDL	GOCC_PROTEIN_LIPID_COMPLEX	28	1.696	0.076313	0.2104	4.109e-16	GOCC_PROTEIN_LIPID_COMPLEX
LDL	REACTOME_LDL_REMODELING	5	4.2702	0.081261	0.48295	5.291e-19	REACTOME_LDL_REMODELING
LDL	WP_LIPID_PARTICLES_COMPOSITI...	4	4.7783	0.081333	0.53986	4.8817e-19	WP_LIPID_PARTICLES_COMPOSITION
PHOS	WP_FGF23_SIGNALING_IN_HYPOPH...	19	1.1187	0.041478	0.24126	1.784e-06	WP_FGF23_SIGNALING_IN_HYPOPHOSPHATEMIC_RICKETS_AND_RELATED_DISORDERS
PHOS	GOBP_BONE_MINERALIZATION	93	0.51985	0.042527	0.11022	1.2109e-06	GOBP_BONE_MINERALIZATION
PHOS	GOBP_INTRACELLULAR_PHOSPHATE...	9	1.7681	0.045133	0.3463	1.6707e-07	GOBP_INTRACELLULAR_PHOSPHATE_ION_HOMEOSTASIS
PHOS	GOBP_PHOSPHATE_ION_HOMEOSTAS...	17	1.5646	0.054876	0.25587	4.9653e-10	GOBP_PHOSPHATE_ION_HOMEOSTASIS
SBP	GOBP_REGULATION_OF_HIGH_VOLT...	10	1.4602	0.039288	0.32332	3.1743e-06	GOBP_REGULATION_OF_HIGH_VOLTAGE_GATED_CALCIUM_CHANNEL_ACTIVITY
SHBG	GOBP_REGULATION_OF_KIDNEY_SI...	4	2.6201	0.044596	0.55605	1.2393e-06	GOBP_REGULATION_OF_KIDNEY_SIZE
SHBG	GOBP_INTERFERON_MEDIATED_SIG...	60	0.69046	0.045423	0.14339	7.4352e-07	GOBP_INTERFERON_MEDIATED_SIGNALING_PATHWAY
SHBG	GOBP_TYPE_II_INTERFERON_MEDI...	19	1.3222	0.049022	0.25922	1.7143e-07	GOBP_TYPE_II_INTERFERON_MEDIATED_SIGNALING_PATHWAY
SHBG	REACTOME_MET_RECEPTOR_ACTIVA...	4	3.381	0.057547	0.55594	6.1135e-10	REACTOME_MET_RECEPTOR_ACTIVATION
TBIL	GOBP_BILE_ACID_AND_BILE_SALT...	24	0.98114	0.040876	0.20588	9.5102e-07	GOBP_BILE_ACID_AND_BILE_SALT_TRANSPORT
TBIL	GOBP_XENOBIOTIC_EXPORT_FROM_...	13	1.4392	0.044148	0.29313	4.6123e-07	GOBP_XENOBIOTIC_EXPORT_FROM_CELL
TBIL	GOMF_BILE_ACID_TRANSMEMBRANE...	16	1.254	0.042669	0.2453	1.6157e-07	GOMF_BILE_ACID_TRANSMEMBRANE_TRANSPORTER_ACTIVITY
TBIL	GOBP_SODIUM_INDEPENDENT_ORGA...	14	1.8106	0.057633	0.29613	4.9891e-10	GOBP_SODIUM_INDEPENDENT_ORGANIC_ANION_TRANSPORT
TBIL	GOMF_SODIUM_INDEPENDENT_ORGA...	14	1.827	0.058157	0.29613	3.5204e-10	GOMF_SODIUM_INDEPENDENT_ORGANIC_ANION_TRANSMEMBRANE_TRANSPORTER_ACTIVITY
TBIL	REACTOME_TRANSPORT_OF_ORGANI...	11	2.1141	0.059658	0.33743	1.9177e-10	REACTOME_TRANSPORT_OF_ORGANIC_ANIONS
TPROT	KEGG_B_CELL_RECEPTOR_SIGNALI...	57	0.66246	0.042483	0.1455	2.6692e-06	KEGG_B_CELL_RECEPTOR_SIGNALING_PATHWAY
TPROT	BIOCARTA_RNA_PATHWAY	5	2.2751	0.043293	0.49099	1.8128e-06	BIOCARTA_RNA_PATHWAY
TPROT	WP_B_CELL_RECEPTOR_SIGNALING...	72	0.5969	0.042998	0.1281	1.6e-06	WP_B_CELL_RECEPTOR_SIGNALING_PATHWAY
TPROT	NAKAYAMA_SOFT_TISSUE_TUMORS_...2	60	0.64983	0.042751	0.13741	1.1382e-06	NAKAYAMA_SOFT_TISSUE_TUMORS_PCA1_UP
TPROT	WP_CANONICAL_NFKB_PATHWAY	6	2.4188	0.05042	0.44814	3.4369e-08	WP_CANONICAL_NFKB_PATHWAY
TPROT	GOMF_IGG_BINDING	6	3.2609	0.067972	0.51902	1.7138e-10	GOMF_IGG_BINDING
TPROT	WP_STING_PATHWAY_IN_KAWASAKI...	13	1.9591	0.060094	0.30377	5.817e-11	WP_STING_PATHWAY_IN_KAWASAKILIKE_DISEASE_AND_COVID19
TPROT	KEGG_LEISHMANIA_INFECTION	49	1.0749	0.063931	0.16041	1.0767e-11	KEGG_LEISHMANIA_INFECTION
TRIG	GOBP_FAT_CELL_DIFFERENTIATION	179	0.36905	0.041753	0.081621	3.0965e-06	GOBP_FAT_CELL_DIFFERENTIATION
TRIG	GOBP_TRIGLYCERIDE_RICH_LIPOP...1	3	2.914	0.042956	0.63043	1.9155e-06	GOBP_TRIGLYCERIDE_RICH_LIPOPROTEIN_PARTICLE_CLEARANCE
TRIG	GOBP_STEROL_METABOLIC_PROCESS	109	0.48897	0.04328	0.10281	9.9666e-07	GOBP_STEROL_METABOLIC_PROCESS
TRIG	REACTOME_VLDL_ASSEMBLY	5	2.5729	0.04896	0.52913	5.8602e-07	REACTOME_VLDL_ASSEMBLY
TRIG	GOBP_VERY_LOW_DENSITY_LIPOPR...2	4	2.6605	0.045284	0.54605	5.579e-07	GOBP_VERY_LOW_DENSITY_LIPOPROTEIN_PARTICLE_CLEARANCE
TRIG	REACTOME_LDL_REMODELING	5	2.4326	0.04629	0.48775	3.0985e-07	REACTOME_LDL_REMODELING
TRIG	REACTOME_HDL_REMODELING	6	2.2278	0.046437	0.44527	2.8557e-07	REACTOME_HDL_REMODELING
TRIG	WP_FAMILIAL_HYPERLIPIDEMIA_T...2	11	1.6731	0.047213	0.32891	1.8445e-07	WP_FAMILIAL_HYPERLIPIDEMIA_TYPE_2
TRIG	GOMF_TRIGLYCERIDE_BINDING	3	3.2312	0.047631	0.63001	1.4785e-07	GOMF_TRIGLYCERIDE_BINDING
TRIG	WP_CHOLESTEROL_METABOLISM	54	0.74845	0.046722	0.14508	1.2606e-07	WP_CHOLESTEROL_METABOLISM
TRIG	GOBP_PROTEIN_LIPID_COMPLEX_A...	19	1.3032	0.048318	0.25028	9.7313e-08	GOBP_PROTEIN_LIPID_COMPLEX_ASSEMBLY
TRIG	GOBP_PROTEIN_LIPID_COMPLEX_S...	33	1.008	0.049226	0.19236	8.1489e-08	GOBP_PROTEIN_LIPID_COMPLEX_SUBUNIT_ORGANIZATION
TRIG	WP_FAMILIAL_HYPERLIPIDEMIA_T...3	10	1.819	0.048944	0.3449	6.7719e-08	WP_FAMILIAL_HYPERLIPIDEMIA_TYPE_3
TRIG	GOMF_STEROL_TRANSFER_ACTIVITY	18	1.374	0.049584	0.25749	4.8294e-08	GOMF_STEROL_TRANSFER_ACTIVITY
TRIG	GOCC_PROTEIN_LIPID_COMPLEX	29	1.1301	0.051744	0.20846	3.0127e-08	GOCC_PROTEIN_LIPID_COMPLEX
TRIG	GOBP_HIGH_DENSITY_LIPOPROTEI...3	10	1.89	0.050852	0.34508	2.2041e-08	GOBP_HIGH_DENSITY_LIPOPROTEIN_PARTICLE_REMODELING
TRIG	GOMF_STEROL_TRANSPORTER_ACTI...	29	1.1046	0.050577	0.20142	2.1169e-08	GOMF_STEROL_TRANSPORTER_ACTIVITY
TRIG	REACTOME_PLASMA_LIPOPROTEIN_...2	57	0.79395	0.050915	0.14431	1.9175e-08	REACTOME_PLASMA_LIPOPROTEIN_ASSEMBLY_REMODELING_AND_CLEARANCE
TRIG	GOCC_HIGH_DENSITY_LIPOPROTEI...	17	1.5757	0.055263	0.2777	7.12e-09	GOCC_HIGH_DENSITY_LIPOPROTEIN_PARTICLE
TRIG	GOBP_NEGATIVE_REGULATION_OF_...144	2	4.3961	0.052913	0.7702	5.8445e-09	GOBP_NEGATIVE_REGULATION_OF_CHOLESTEROL_METABOLIC_PROCESS
TRIG	REACTOME_CHYLOMICRON_ASSEMBLY	6	2.6081	0.054365	0.44526	2.4056e-09	REACTOME_CHYLOMICRON_ASSEMBLY
TRIG	GOBP_PROTEIN_CONTAINING_COMP...4	21	1.4363	0.05598	0.24282	1.7004e-09	GOBP_PROTEIN_CONTAINING_COMPLEX_REMODELING
TRIG	WP_METABOLIC_PATHWAY_OF_LDL_...	13	1.8586	0.057013	0.30262	4.1965e-10	WP_METABOLIC_PATHWAY_OF_LDL_HDL_AND_TG_INCLUDING_DISEASES
TRIG	GOBP_TRIGLYCERIDE_RICH_LIPOP...2	6	2.9	0.060449	0.4452	3.7947e-11	GOBP_TRIGLYCERIDE_RICH_LIPOPROTEIN_PARTICLE_REMODELING
TRIG	GOCC_TRIGLYCERIDE_RICH_PLASM...	14	1.9637	0.062507	0.29977	2.968e-11	GOCC_TRIGLYCERIDE_RICH_PLASMA_LIPOPROTEIN_PARTICLE
TRIG	REACTOME_PLASMA_LIPOPROTEIN_...1	14	1.9652	0.062556	0.29948	2.7504e-11	REACTOME_PLASMA_LIPOPROTEIN_ASSEMBLY
TRIG	REACTOME_PLASMA_LIPOPROTEIN_...4	22	1.6119	0.064303	0.2324	2.11e-12	REACTOME_PLASMA_LIPOPROTEIN_REMODELING
TRIG	GOMF_PHOSPHATIDYLCHOLINE_STE...	3	4.3703	0.064422	0.62993	2.0846e-12	GOMF_PHOSPHATIDYLCHOLINE_STEROL_O_ACYLTRANSFERASE_ACTIVATOR_ACTIVITY
TRIG	WP_STATIN_INHIBITION_OF_CHOL...	22	1.746	0.069649	0.23268	3.2967e-14	WP_STATIN_INHIBITION_OF_CHOLESTEROL_PRODUCTION
TRIG	GOCC_CHYLOMICRON	8	3.1211	0.075116	0.38534	2.9997e-16	GOCC_CHYLOMICRON
TRIG	WP_LIPID_PARTICLES_COMPOSITI...	5	4.1418	0.078815	0.4868	9.7582e-18	WP_LIPID_PARTICLES_COMPOSITION
TRIG	REACTOME_CHYLOMICRON_REMODEL...	4	4.8737	0.082954	0.54447	1.9877e-19	REACTOME_CHYLOMICRON_REMODELING
URT	GOBP_CARNITINE_TRANSPORT	6	2.0271	0.042255	0.4486	3.1362e-06	GOBP_CARNITINE_TRANSPORT
URT	REACTOME_ORGANIC_CATION_ANIO...	13	1.7949	0.055057	0.30415	1.8475e-09	REACTOME_ORGANIC_CATION_ANION_ZWITTERION_TRANSPORT
URT	REACTOME_ORGANIC_ANION_TRANS...1	4	3.3496	0.057014	0.56189	1.2821e-09	REACTOME_ORGANIC_ANION_TRANSPORT
URT	GOBP_URATE_TRANSPORT	6	3.6161	0.075376	0.44561	2.6437e-16	GOBP_URATE_TRANSPORT
URT	GOMF_URATE_TRANSMEMBRANE_TRA...	5	4.2287	0.080468	0.48777	2.4204e-18	GOMF_URATE_TRANSMEMBRANE_TRANSPORTER_ACTIVITY
URT	GOBP_URATE_METABOLIC_PROCESS	11	3.3395	0.094235	0.33176	4.7558e-24	GOBP_URATE_METABOLIC_PROCESS
VITD	WP_VITAMIN_D_METABOLISM	7	1.8371	0.04136	0.39233	1.4311e-06	WP_VITAMIN_D_METABOLISM
VITD	GOBP_TRANSCYTOSIS	15	1.3127	0.04325	0.27093	6.3938e-07	GOBP_TRANSCYTOSIS

## Sheet: Table S2
Trait	Variable	Number of genes	Beta	SD	SE	P-value	Full set
ALB	GOMF_IGG_BINDING	5	2.8651	0.052554	0.52494	2.4468e-08	GOMF_IGG_BINDING
ALP	WP_LACTO_SERIES_SPHINGOLIPID...	4	2.6327	0.043193	0.53644	4.6587e-07	WP_LACTO_SERIES_SPHINGOLIPID_METABOLISM
APOA	ROVERSI_GLIOMA_COPY_NUMBER_UP	78	0.55198	0.039891	0.12235	3.2459e-06	ROVERSI_GLIOMA_COPY_NUMBER_UP
APOA	GOBP_STEROL_TRANSPORT	97	0.48909	0.039391	0.10779	2.868e-06	GOBP_STEROL_TRANSPORT
APOA	GOBP_LIPID_HOMEOSTASIS	121	0.44956	0.040406	0.097015	1.8097e-06	GOBP_LIPID_HOMEOSTASIS
APOA	REACTOME_PLASMA_LIPOPROTEIN_...2	57	0.68482	0.042338	0.13898	4.2113e-07	REACTOME_PLASMA_LIPOPROTEIN_ASSEMBLY_REMODELING_AND_CLEARANCE
APOA	WP_EFFECT_OF_INTESTINAL_MICR...	8	1.8077	0.041937	0.36537	3.8014e-07	WP_EFFECT_OF_INTESTINAL_MICROBIOME_ON_ANTICOAGULANT_RESPONSE_OF_VITAMIN_K_ANTAGONISTS
APOA	REACTOME_SCAVENGING_BY_CLASS...2	4	2.6993	0.044286	0.52661	1.5005e-07	REACTOME_SCAVENGING_BY_CLASS_B_RECEPTORS
APOA	REACTOME_PLASMA_LIPOPROTEIN_...4	21	1.2356	0.046424	0.23354	6.1721e-08	REACTOME_PLASMA_LIPOPROTEIN_REMODELING
APOA	GOBP_STEROL_HOMEOSTASIS	66	0.69846	0.046451	0.13157	5.6041e-08	GOBP_STEROL_HOMEOSTASIS
APOA	GOBP_CHOLESTEROL_EFFLUX	38	0.91669	0.046303	0.17235	5.3003e-08	GOBP_CHOLESTEROL_EFFLUX
APOA	WP_CHOLESTEROL_METABOLISM	56	0.76494	0.046876	0.14259	4.1217e-08	WP_CHOLESTEROL_METABOLISM
APOA	GOMF_PROTEIN_LIPID_COMPLEX_B...	21	1.2381	0.046515	0.22997	3.7097e-08	GOMF_PROTEIN_LIPID_COMPLEX_BINDING
APOA	GOMF_APOLIPOPROTEIN_BINDING	16	1.4632	0.047994	0.2602	9.5345e-09	GOMF_APOLIPOPROTEIN_BINDING
APOA	GOMF_TRIGLYCERIDE_BINDING	3	3.5202	0.050019	0.62568	9.38e-09	GOMF_TRIGLYCERIDE_BINDING
APOA	GOBP_REGULATION_OF_PLASMA_LI...	51	0.84244	0.049275	0.14822	6.7109e-09	GOBP_REGULATION_OF_PLASMA_LIPOPROTEIN_PARTICLE_LEVELS
APOA	GOBP_PROTEIN_CONTAINING_COMP...4	20	1.3474	0.049405	0.23405	4.3723e-09	GOBP_PROTEIN_CONTAINING_COMPLEX_REMODELING
APOA	GOBP_POSITIVE_REGULATION_OF_...163	7	2.3416	0.050818	0.39957	2.3586e-09	GOBP_POSITIVE_REGULATION_OF_CHOLESTEROL_STORAGE
APOA	WP_FAMILIAL_HYPERLIPIDEMIA_T...5	8	2.1894	0.050793	0.37195	2.0171e-09	WP_FAMILIAL_HYPERLIPIDEMIA_TYPE_5
APOA	GOBP_PROTEIN_LIPID_COMPLEX_S...	33	1.1118	0.052344	0.18363	7.2046e-10	GOBP_PROTEIN_LIPID_COMPLEX_SUBUNIT_ORGANIZATION
APOA	WP_FAMILIAL_HYPERLIPIDEMIA_T...1	10	2.0693	0.053668	0.3334	2.7822e-10	WP_FAMILIAL_HYPERLIPIDEMIA_TYPE_1
APOA	GOBP_ACYLGLYCEROL_HOMEOSTASIS	24	1.3447	0.054003	0.21265	1.3169e-10	GOBP_ACYLGLYCEROL_HOMEOSTASIS
APOA	GOBP_HIGH_DENSITY_LIPOPROTEI...3	9	2.2747	0.055971	0.35355	6.4176e-11	GOBP_HIGH_DENSITY_LIPOPROTEIN_PARTICLE_REMODELING
APOA	WP_FAMILIAL_HYPERLIPIDEMIA_T...2	11	2.0524	0.055826	0.31836	5.896e-11	WP_FAMILIAL_HYPERLIPIDEMIA_TYPE_2
APOA	GOBP_CHOLESTEROL_STORAGE	16	1.7571	0.057633	0.26427	1.5288e-11	GOBP_CHOLESTEROL_STORAGE
APOA	GOBP_TRIGLYCERIDE_RICH_LIPOP...2	4	3.4915	0.057285	0.51866	8.6917e-12	GOBP_TRIGLYCERIDE_RICH_LIPOPROTEIN_PARTICLE_REMODELING
APOA	GOMF_APOLIPOPROTEIN_A_I_BIND...	3	4.227	0.060062	0.62373	6.37e-12	GOMF_APOLIPOPROTEIN_A_I_BINDING
APOA	REACTOME_CHYLOMICRON_REMODEL...	2	5.2101	0.060448	0.76589	5.3347e-12	REACTOME_CHYLOMICRON_REMODELING
APOA	GOBP_REVERSE_CHOLESTEROL_TRA...	9	2.5221	0.062059	0.35345	5.0401e-13	GOBP_REVERSE_CHOLESTEROL_TRANSPORT
APOA	WP_STATIN_INHIBITION_OF_CHOL...	21	1.711	0.064286	0.23239	9.4839e-14	WP_STATIN_INHIBITION_OF_CHOLESTEROL_PRODUCTION
APOA	WP_LIPID_PARTICLES_COMPOSITI...	4	4.1912	0.068764	0.54035	4.6515e-15	WP_LIPID_PARTICLES_COMPOSITION
APOA	WP_FAMILIAL_HYPERLIPIDEMIA_T...3	8	2.9173	0.067679	0.37246	2.5582e-15	WP_FAMILIAL_HYPERLIPIDEMIA_TYPE_3
APOA	WP_METABOLIC_PATHWAY_OF_LDL_...	12	3.049	0.086621	0.30732	1.9894e-23	WP_METABOLIC_PATHWAY_OF_LDL_HDL_AND_TG_INCLUDING_DISEASES
APOB	GOBP_REGULATION_OF_STEROL_TR...	45	0.71497	0.03929	0.15853	3.2665e-06	GOBP_REGULATION_OF_STEROL_TRANSPORT
APOB	GOBP_RECEPTOR_MEDIATED_ENDOC...2	6	1.9788	0.03976	0.43702	3.0003e-06	GOBP_RECEPTOR_MEDIATED_ENDOCYTOSIS_INVOLVED_IN_CHOLESTEROL_TRANSPORT
APOB	GOBP_LIPID_HOMEOSTASIS	121	0.44318	0.039834	0.097395	2.6989e-06	GOBP_LIPID_HOMEOSTASIS
APOB	GOMF_STEROL_TRANSFER_ACTIVITY	17	1.2268	0.041475	0.26021	1.2222e-06	GOMF_STEROL_TRANSFER_ACTIVITY
APOB	GOMF_QUATERNARY_AMMONIUM_GRO...2	16	1.2404	0.040684	0.26158	1.0689e-06	GOMF_QUATERNARY_AMMONIUM_GROUP_TRANSMEMBRANE_TRANSPORTER_ACTIVITY
APOB	GOBP_LOW_DENSITY_LIPOPROTEIN...3	5	2.3204	0.042561	0.48612	9.1551e-07	GOBP_LOW_DENSITY_LIPOPROTEIN_RECEPTOR_PARTICLE_METABOLIC_PROCESS
APOB	GOMF_APOLIPOPROTEIN_BINDING	16	1.2581	0.041265	0.26129	7.439e-07	GOMF_APOLIPOPROTEIN_BINDING
APOB	GOMF_TOXIN_TRANSMEMBRANE_TRA...	9	1.7529	0.043132	0.36082	5.9875e-07	GOMF_TOXIN_TRANSMEMBRANE_TRANSPORTER_ACTIVITY
APOB	REACTOME_ABACAVIR_ADME	9	1.7282	0.042525	0.35249	4.7701e-07	REACTOME_ABACAVIR_ADME
APOB	GOBP_PROTEIN_CONTAINING_COMP...4	20	1.1617	0.042594	0.23503	3.9e-07	GOBP_PROTEIN_CONTAINING_COMPLEX_REMODELING
APOB	REACTOME_PLASMA_LIPOPROTEIN_...4	21	1.1916	0.044768	0.23446	1.8897e-07	REACTOME_PLASMA_LIPOPROTEIN_REMODELING
APOB	GOCC_TRIGLYCERIDE_RICH_PLASM...	9	1.7904	0.044053	0.35172	1.8106e-07	GOCC_TRIGLYCERIDE_RICH_PLASMA_LIPOPROTEIN_PARTICLE
APOB	GOBP_TRIGLYCERIDE_RICH_LIPOP...2	4	2.6659	0.043738	0.52102	1.5754e-07	GOBP_TRIGLYCERIDE_RICH_LIPOPROTEIN_PARTICLE_REMODELING
APOB	GOBP_ACYLGLYCEROL_TRANSPORT	5	2.4587	0.045099	0.47357	1.0553e-07	GOBP_ACYLGLYCEROL_TRANSPORT
APOB	REACTOME_ORGANIC_CATION_TRAN...	8	1.9812	0.045963	0.3797	9.1785e-08	REACTOME_ORGANIC_CATION_TRANSPORT
APOB	GOBP_NEGATIVE_REGULATION_OF_...622	9	1.9127	0.047065	0.36231	6.5768e-08	GOBP_NEGATIVE_REGULATION_OF_STEROL_TRANSPORT
APOB	WP_FAMILIAL_HYPERLIPIDEMIA_T...5	8	1.9763	0.045848	0.37348	6.1544e-08	WP_FAMILIAL_HYPERLIPIDEMIA_TYPE_5
APOB	WP_FAMILIAL_HYPERLIPIDEMIA_T...4	15	1.4756	0.046865	0.27465	3.9371e-08	WP_FAMILIAL_HYPERLIPIDEMIA_TYPE_4
APOB	REACTOME_PLASMA_LIPOPROTEIN_...2	57	0.755	0.046676	0.1395	3.1604e-08	REACTOME_PLASMA_LIPOPROTEIN_ASSEMBLY_REMODELING_AND_CLEARANCE
APOB	GOBP_EPINEPHRINE_TRANSPORT	5	2.6517	0.048639	0.47862	1.5358e-08	GOBP_EPINEPHRINE_TRANSPORT
APOB	GOCC_CHYLOMICRON	6	2.3681	0.047581	0.42478	1.2609e-08	GOCC_CHYLOMICRON
APOB	GOBP_LOW_DENSITY_LIPOPROTEIN...1	22	1.2888	0.049558	0.22833	8.4465e-09	GOBP_LOW_DENSITY_LIPOPROTEIN_PARTICLE_CLEARANCE
APOB	GOBP_REGULATION_OF_LOW_DENSI...	11	1.9454	0.052916	0.32716	1.4032e-09	GOBP_REGULATION_OF_LOW_DENSITY_LIPOPROTEIN_PARTICLE_CLEARANCE
APOB	REACTOME_ABACAVIR_TRANSMEMBR...	5	2.8352	0.052005	0.47622	1.3424e-09	REACTOME_ABACAVIR_TRANSMEMBRANE_TRANSPORT
APOB	REACTOME_VLDL_ASSEMBLY	4	3.2386	0.053134	0.54259	1.2236e-09	REACTOME_VLDL_ASSEMBLY
APOB	GOCC_HIGH_DENSITY_LIPOPROTEI...	14	1.7121	0.052534	0.28019	5.0892e-10	GOCC_HIGH_DENSITY_LIPOPROTEIN_PARTICLE
APOB	GOBP_PLASMA_LIPOPROTEIN_PART...	29	1.225	0.054072	0.19771	2.9715e-10	GOBP_PLASMA_LIPOPROTEIN_PARTICLE_CLEARANCE
APOB	GOBP_REGULATION_OF_LIPOPROTE...3	15	1.7285	0.054897	0.27829	2.702e-10	GOBP_REGULATION_OF_LIPOPROTEIN_PARTICLE_CLEARANCE
APOB	WP_FAMILIAL_HYPERLIPIDEMIA_T...3	8	2.3727	0.055044	0.37418	1.176e-10	WP_FAMILIAL_HYPERLIPIDEMIA_TYPE_3
APOB	GOBP_NEGATIVE_REGULATION_OF_...365	6	2.8112	0.056484	0.44327	1.1679e-10	GOBP_NEGATIVE_REGULATION_OF_LOW_DENSITY_LIPOPROTEIN_PARTICLE_CLEARANCE
APOB	GOBP_REGULATION_OF_PLASMA_LI...	51	0.96281	0.056316	0.14874	4.958e-11	GOBP_REGULATION_OF_PLASMA_LIPOPROTEIN_PARTICLE_LEVELS
APOB	WP_CHOLESTEROL_METABOLISM	56	0.9825	0.060208	0.14306	3.3935e-12	WP_CHOLESTEROL_METABOLISM
APOB	WP_FAMILIAL_HYPERLIPIDEMIA_T...2	11	2.2665	0.06165	0.3195	6.8281e-13	WP_FAMILIAL_HYPERLIPIDEMIA_TYPE_2
APOB	WP_METABOLIC_PATHWAY_OF_LDL_...	12	2.2408	0.063661	0.309	2.1575e-13	WP_METABOLIC_PATHWAY_OF_LDL_HDL_AND_TG_INCLUDING_DISEASES
APOB	GOBP_NEGATIVE_REGULATION_OF_...362	8	2.831	0.065678	0.38341	8.117e-14	GOBP_NEGATIVE_REGULATION_OF_LIPOPROTEIN_PARTICLE_CLEARANCE
APOB	GOCC_PROTEIN_LIPID_COMPLEX	24	1.6035	0.064399	0.21472	4.3019e-14	GOCC_PROTEIN_LIPID_COMPLEX
APOB	WP_STATIN_INHIBITION_OF_CHOL...	21	1.8078	0.06792	0.23325	4.8762e-15	WP_STATIN_INHIBITION_OF_CHOLESTEROL_PRODUCTION
APOB	WP_LIPID_PARTICLES_COMPOSITI...	4	4.3616	0.071559	0.54236	4.7651e-16	WP_LIPID_PARTICLES_COMPOSITION
APOB	REACTOME_LDL_REMODELING	5	3.9148	0.071808	0.48439	3.4334e-16	REACTOME_LDL_REMODELING
AST	WORSCHECH_TUMOR_EVASION_AND_...1	8	1.6017	0.037159	0.34067	1.3018e-06	WORSCHECH_TUMOR_EVASION_AND_TOLEROGENICITY_DN
BMI	GOBP_OXIDATIVE_RNA_DEMETHYLA...	5	2.2041	0.040429	0.4641	1.0306e-06	GOBP_OXIDATIVE_RNA_DEMETHYLATION
BMI	GOMF_OXIDATIVE_RNA_DEMETHYLA...	5	2.2041	0.040429	0.4641	1.0306e-06	GOMF_OXIDATIVE_RNA_DEMETHYLASE_ACTIVITY
BMI	GOMF_DNA_DEMETHYLASE_ACTIVITY	5	2.2008	0.040368	0.45266	5.8727e-07	GOMF_DNA_DEMETHYLASE_ACTIVITY
CHO	GOMF_APOLIPOPROTEIN_A_I_BIND...	3	2.7739	0.039414	0.61254	2.9945e-06	GOMF_APOLIPOPROTEIN_A_I_BINDING
CHO	GOBP_NOREPINEPHRINE_UPTAKE	8	1.7496	0.04059	0.38149	2.2745e-06	GOBP_NOREPINEPHRINE_UPTAKE
CHO	GOBP_REGULATION_OF_ASTROCYTE...1	3	2.8398	0.040351	0.60915	1.5798e-06	GOBP_REGULATION_OF_ASTROCYTE_ACTIVATION
CHO	GOBP_ACYLGLYCEROL_HOMEOSTASIS	24	0.97743	0.039254	0.20878	1.4363e-06	GOBP_ACYLGLYCEROL_HOMEOSTASIS
CHO	GOBP_NEGATIVE_REGULATION_OF_...557	5	2.2427	0.041137	0.4753	1.1989e-06	GOBP_NEGATIVE_REGULATION_OF_RECEPTOR_RECYCLING
CHO	GOCC_HIGH_DENSITY_LIPOPROTEI...	14	1.2934	0.039685	0.274	1.1883e-06	GOCC_HIGH_DENSITY_LIPOPROTEIN_PARTICLE
CHO	GOBP_PHOSPHOLIPID_HOMEOSTASIS	15	1.2843	0.040788	0.27191	1.1717e-06	GOBP_PHOSPHOLIPID_HOMEOSTASIS
CHO	WP_FAMILIAL_HYPERLIPIDEMIA_T...5	8	1.7304	0.040145	0.36511	1.0816e-06	WP_FAMILIAL_HYPERLIPIDEMIA_TYPE_5
CHO	GOBP_CHOLESTEROL_EFFLUX	38	0.80346	0.040584	0.16914	1.026e-06	GOBP_CHOLESTEROL_EFFLUX
CHO	REACTOME_PLASMA_LIPOPROTEIN_...1	11	1.5094	0.041056	0.31759	1.014e-06	REACTOME_PLASMA_LIPOPROTEIN_ASSEMBLY
CHO	WP_SREBF_AND_MIR33_IN_CHOLES...	14	1.338	0.041054	0.27918	8.3156e-07	WP_SREBF_AND_MIR33_IN_CHOLESTEROL_AND_LIPID_HOMEOSTASIS
CHO	REACTOME_VLDL_ASSEMBLY	4	2.5649	0.042081	0.53056	6.7469e-07	REACTOME_VLDL_ASSEMBLY
CHO	REACTOME_ORGANIC_CATION_TRAN...	8	1.8284	0.042417	0.37116	4.2417e-07	REACTOME_ORGANIC_CATION_TRANSPORT
CHO	REACTOME_CHYLOMICRON_CLEARAN...	4	2.5198	0.041342	0.50912	3.7645e-07	REACTOME_CHYLOMICRON_CLEARANCE
CHO	GOBP_PHOSPHATIDYLCHOLINE_CAT...	13	1.4353	0.04244	0.28874	3.3684e-07	GOBP_PHOSPHATIDYLCHOLINE_CATABOLIC_PROCESS
CHO	GOBP_REGULATION_OF_PHOSPHATI...2	10	1.6713	0.043346	0.33405	2.8542e-07	GOBP_REGULATION_OF_PHOSPHATIDYLCHOLINE_METABOLIC_PROCESS
CHO	REACTOME_NR1H2_AND_NR1H3_MED...	40	0.83733	0.04339	0.16608	2.333e-07	REACTOME_NR1H2_AND_NR1H3_MEDIATED_SIGNALING
CHO	REACTOME_ABACAVIR_ADME	9	1.7432	0.042892	0.3445	2.1232e-07	REACTOME_ABACAVIR_ADME
CHO	GOMF_MONOAMINE_TRANSMEMBRANE...	10	1.7331	0.044949	0.3399	1.7314e-07	GOMF_MONOAMINE_TRANSMEMBRANE_TRANSPORTER_ACTIVITY
CHO	REACTOME_PLASMA_LIPOPROTEIN_...3	31	0.92337	0.042136	0.18095	1.6928e-07	REACTOME_PLASMA_LIPOPROTEIN_CLEARANCE
CHO	VILLANUEVA_LIVER_CANCER_KRT1...1	51	0.75439	0.044125	0.14585	1.1704e-07	VILLANUEVA_LIVER_CANCER_KRT19_DN
CHO	GOBP_SEROTONIN_UPTAKE	11	1.7437	0.047431	0.33325	8.4831e-08	GOBP_SEROTONIN_UPTAKE
CHO	GOBP_NEGATIVE_REGULATION_OF_...355	34	0.95362	0.045569	0.18216	8.3669e-08	GOBP_NEGATIVE_REGULATION_OF_LIPID_LOCALIZATION
CHO	SCHMIDT_POR_TARGETS_IN_LIMB_...1	6	2.1901	0.044005	0.41638	7.3106e-08	SCHMIDT_POR_TARGETS_IN_LIMB_BUD_DN
CHO	GOBP_STEROL_TRANSPORT	97	0.55988	0.045093	0.10573	6.0318e-08	GOBP_STEROL_TRANSPORT
CHO	GOBP_LOW_DENSITY_LIPOPROTEIN...1	22	1.196	0.045991	0.2232	4.2604e-08	GOBP_LOW_DENSITY_LIPOPROTEIN_PARTICLE_CLEARANCE
CHO	GOBP_STEROL_HOMEOSTASIS	66	0.69591	0.046281	0.1291	3.5649e-08	GOBP_STEROL_HOMEOSTASIS
CHO	WP_CHOLESTASIS	19	1.3114	0.046867	0.24158	2.8913e-08	WP_CHOLESTASIS
CHO	GOBP_EPINEPHRINE_TRANSPORT	5	2.5422	0.04663	0.46783	2.8007e-08	GOBP_EPINEPHRINE_TRANSPORT
CHO	GOBP_REGULATION_OF_STEROL_TR...	45	0.85089	0.04676	0.1549	2.0052e-08	GOBP_REGULATION_OF_STEROL_TRANSPORT
CHO	WP_LIPID_PARTICLES_COMPOSITI...	4	2.9196	0.0479	0.53074	1.9209e-08	WP_LIPID_PARTICLES_COMPOSITION
CHO	GOBP_NEGATIVE_REGULATION_OF_...32	2	4.1275	0.047888	0.74974	1.8743e-08	GOBP_NEGATIVE_REGULATION_OF_ASTROCYTE_ACTIVATION
CHO	REACTOME_NR1H3_NR1H2_REGULAT...	31	1.0394	0.04743	0.18818	1.6926e-08	REACTOME_NR1H3_NR1H2_REGULATE_GENE_EXPRESSION_LINKED_TO_CHOLESTEROL_TRANSPORT_AND_EFFLUX
CHO	GOBP_REGULATION_OF_PLASMA_LI...	51	0.83386	0.048773	0.14543	5.0074e-09	GOBP_REGULATION_OF_PLASMA_LIPOPROTEIN_PARTICLE_LEVELS
CHO	GOBP_TRIGLYCERIDE_RICH_LIPOP...1	2	3.9954	0.046355	0.69386	4.3353e-09	GOBP_TRIGLYCERIDE_RICH_LIPOPROTEIN_PARTICLE_CLEARANCE
CHO	WP_FAMILIAL_HYPERLIPIDEMIA_T...3	8	2.1133	0.049027	0.36582	3.8834e-09	WP_FAMILIAL_HYPERLIPIDEMIA_TYPE_3
CHO	REACTOME_PLASMA_LIPOPROTEIN_...2	57	0.79098	0.048901	0.13633	3.341e-09	REACTOME_PLASMA_LIPOPROTEIN_ASSEMBLY_REMODELING_AND_CLEARANCE
CHO	GOBP_REGULATION_OF_LOW_DENSI...	11	1.8822	0.051198	0.31978	2.0214e-09	GOBP_REGULATION_OF_LOW_DENSITY_LIPOPROTEIN_PARTICLE_CLEARANCE
CHO	WP_FAMILIAL_HYPERLIPIDEMIA_T...2	11	1.8531	0.050405	0.31245	1.5414e-09	WP_FAMILIAL_HYPERLIPIDEMIA_TYPE_2
CHO	BIOCARTA_FXR_PATHWAY	7	2.2981	0.049872	0.38689	1.4592e-09	BIOCARTA_FXR_PATHWAY
CHO	GOMF_APOLIPOPROTEIN_BINDING	16	1.5332	0.050288	0.25527	9.7367e-10	GOMF_APOLIPOPROTEIN_BINDING
CHO	REACTOME_ABACAVIR_TRANSMEMBR...	5	2.8354	0.052009	0.46544	5.7171e-10	REACTOME_ABACAVIR_TRANSMEMBRANE_TRANSPORT
CHO	GOCC_PROTEIN_LIPID_COMPLEX	24	1.2812	0.051454	0.21	5.4074e-10	GOCC_PROTEIN_LIPID_COMPLEX
CHO	GOBP_REGULATION_OF_LIPOPROTE...3	15	1.6739	0.053163	0.27201	3.8804e-10	GOBP_REGULATION_OF_LIPOPROTEIN_PARTICLE_CLEARANCE
CHO	REACTOME_LDL_REMODELING	5	2.9243	0.05364	0.47389	3.4848e-10	REACTOME_LDL_REMODELING
CHO	GOBP_NEGATIVE_REGULATION_OF_...622	9	2.2056	0.054271	0.35399	2.3867e-10	GOBP_NEGATIVE_REGULATION_OF_STEROL_TRANSPORT
CHO	GOBP_LIPID_HOMEOSTASIS	121	0.60702	0.05456	0.095129	9.0611e-11	GOBP_LIPID_HOMEOSTASIS
CHO	GOBP_NEGATIVE_REGULATION_OF_...365	6	2.8699	0.057665	0.4332	1.7973e-11	GOBP_NEGATIVE_REGULATION_OF_LOW_DENSITY_LIPOPROTEIN_PARTICLE_CLEARANCE
CHO	GOBP_PLASMA_LIPOPROTEIN_PART...	29	1.2912	0.056991	0.1932	1.2129e-11	GOBP_PLASMA_LIPOPROTEIN_PARTICLE_CLEARANCE
CHO	GOBP_NEGATIVE_REGULATION_OF_...362	8	2.7503	0.063804	0.37476	1.1355e-13	GOBP_NEGATIVE_REGULATION_OF_LIPOPROTEIN_PARTICLE_CLEARANCE
CHO	WP_CHOLESTEROL_METABOLISM	56	1.0453	0.064059	0.13979	3.9856e-14	WP_CHOLESTEROL_METABOLISM
CHO	WP_METABOLIC_PATHWAY_OF_LDL_...	12	2.4308	0.069058	0.30189	4.3891e-16	WP_METABOLIC_PATHWAY_OF_LDL_HDL_AND_TG_INCLUDING_DISEASES
CHO	WP_STATIN_INHIBITION_OF_CHOL...	21	2.0122	0.075599	0.22784	5.7408e-19	WP_STATIN_INHIBITION_OF_CHOLESTEROL_PRODUCTION
CREA	GOMF_THIAMINE_TRANSMEMBRANE_...	7	1.7782	0.03859	0.39214	2.9085e-06	GOMF_THIAMINE_TRANSMEMBRANE_TRANSPORTER_ACTIVITY
CREA	GOMF_POLYAMINE_TRANSMEMBRANE...	9	1.7891	0.044023	0.36719	5.5706e-07	GOMF_POLYAMINE_TRANSMEMBRANE_TRANSPORTER_ACTIVITY
CREA	REACTOME_ABACAVIR_ADME	9	1.8033	0.044371	0.35184	1.5054e-07	REACTOME_ABACAVIR_ADME
CREA	REACTOME_ORGANIC_CATION_ANIO...	10	1.77	0.045907	0.33966	9.5109e-08	REACTOME_ORGANIC_CATION_ANION_ZWITTERION_TRANSPORT
CREA	REACTOME_ORGANIC_CATION_TRAN...	8	2.0222	0.046914	0.37902	4.8411e-08	REACTOME_ORGANIC_CATION_TRANSPORT
CREA	REACTOME_ABACAVIR_TRANSMEMBR...	5	2.558	0.04692	0.4755	3.7908e-08	REACTOME_ABACAVIR_TRANSMEMBRANE_TRANSPORT
CRP	GOBP_NAD_TRANSPORT	3	2.977	0.042301	0.61007	5.3648e-07	GOBP_NAD_TRANSPORT
CRP	REACTOME_NECTIN_NECL_TRANS_H...	7	2.2936	0.049774	0.40659	8.614e-09	REACTOME_NECTIN_NECL_TRANS_HETERODIMERIZATION
GGT	REACTOME_RUNX3_REGULATES_BCL...	5	1.9789	0.036299	0.42907	2.0104e-06	REACTOME_RUNX3_REGULATES_BCL2L11_BIM_TRANSCRIPTION
HBA1C	GOBP_REGULATION_OF_TRANSPORT	1394	0.13642	0.039779	0.030168	3.0894e-06	GOBP_REGULATION_OF_TRANSPORT
HBA1C	VALK_AML_CLUSTER_7	23	1.0564	0.041535	0.22378	1.1853e-06	VALK_AML_CLUSTER_7
HBA1C	GOMF_HEXOKINASE_ACTIVITY	5	2.6413	0.048449	0.49376	4.4776e-08	GOMF_HEXOKINASE_ACTIVITY
HBA1C	GOCC_SPECTRIN_ASSOCIATED_CYT...	9	2.2861	0.056252	0.36034	1.1494e-10	GOCC_SPECTRIN_ASSOCIATED_CYTOSKELETON
HDL	GOBP_STEROL_TRANSPORT	97	0.49911	0.040199	0.10962	2.6666e-06	GOBP_STEROL_TRANSPORT
HDL	GOBP_REGULATION_OF_STEROL_TR...	45	0.74803	0.041107	0.1606	1.6131e-06	GOBP_REGULATION_OF_STEROL_TRANSPORT
HDL	GOBP_NEGATIVE_REGULATION_OF_...144	8	1.7929	0.041595	0.38465	1.5854e-06	GOBP_NEGATIVE_REGULATION_OF_CHOLESTEROL_STORAGE
HDL	GOBP_REGULATION_OF_MACROPHAG...4	26	0.9991	0.04176	0.21334	1.4249e-06	GOBP_REGULATION_OF_MACROPHAGE_DERIVED_FOAM_CELL_DIFFERENTIATION
HDL	GOBP_NEGATIVE_REGULATION_OF_...378	11	1.6006	0.043538	0.33898	1.1799e-06	GOBP_NEGATIVE_REGULATION_OF_MACROPHAGE_DERIVED_FOAM_CELL_DIFFERENTIATION
HDL	GOCC_CHYLOMICRON	6	2.0423	0.041036	0.43048	1.0559e-06	GOCC_CHYLOMICRON
HDL	GOBP_PHOSPHOLIPID_EFFLUX	7	1.9861	0.043103	0.41506	8.6237e-07	GOBP_PHOSPHOLIPID_EFFLUX
HDL	GOBP_NEGATIVE_REGULATION_OF_...355	34	0.90974	0.043472	0.18885	7.3461e-07	GOBP_NEGATIVE_REGULATION_OF_LIPID_LOCALIZATION
HDL	GOBP_LIPID_HOMEOSTASIS	121	0.47646	0.042824	0.098663	6.9263e-07	GOBP_LIPID_HOMEOSTASIS
HDL	WP_FAMILIAL_HYPERLIPIDEMIA_T...5	8	1.8639	0.043241	0.37843	4.2573e-07	WP_FAMILIAL_HYPERLIPIDEMIA_TYPE_5
HDL	GOBP_STEROL_HOMEOSTASIS	66	0.6657	0.044273	0.13383	3.3129e-07	GOBP_STEROL_HOMEOSTASIS
HDL	GOBP_REGULATION_OF_CHOLESTER...2	26	1.0533	0.044027	0.21101	3.0252e-07	GOBP_REGULATION_OF_CHOLESTEROL_EFFLUX
HDL	REACTOME_LDL_REMODELING	5	2.4593	0.04511	0.49142	2.8332e-07	REACTOME_LDL_REMODELING
HDL	GOBP_PHOSPHOLIPID_HOMEOSTASIS	15	1.4538	0.046171	0.2818	1.2582e-07	GOBP_PHOSPHOLIPID_HOMEOSTASIS
HDL	GOBP_POSITIVE_REGULATION_OF_...163	7	2.138	0.046399	0.40648	7.3081e-08	GOBP_POSITIVE_REGULATION_OF_CHOLESTEROL_STORAGE
HDL	GOBP_REGULATION_OF_PLASMA_LI...	51	0.80691	0.047197	0.15076	4.4113e-08	GOBP_REGULATION_OF_PLASMA_LIPOPROTEIN_PARTICLE_LEVELS
HDL	GOBP_CELLULAR_RESPONSE_TO_LI...4	23	1.2251	0.048168	0.22117	1.5436e-08	GOBP_CELLULAR_RESPONSE_TO_LIPOPROTEIN_PARTICLE_STIMULUS
HDL	GOBP_CHOLESTEROL_EFFLUX	38	0.9723	0.049112	0.17527	1.4758e-08	GOBP_CHOLESTEROL_EFFLUX
HDL	GOMF_APOLIPOPROTEIN_BINDING	16	1.4705	0.048232	0.26465	1.4016e-08	GOMF_APOLIPOPROTEIN_BINDING
HDL	GOMF_TRIGLYCERIDE_BINDING	3	3.5411	0.050316	0.63636	1.3368e-08	GOMF_TRIGLYCERIDE_BINDING
HDL	REACTOME_SCAVENGING_BY_CLASS...2	4	3.026	0.049647	0.53549	8.1263e-09	REACTOME_SCAVENGING_BY_CLASS_B_RECEPTORS
HDL	GOBP_HIGH_DENSITY_LIPOPROTEI...3	9	2.0449	0.050315	0.3597	6.6681e-09	GOBP_HIGH_DENSITY_LIPOPROTEIN_PARTICLE_REMODELING
HDL	WP_CHOLESTEROL_METABOLISM	56	0.84744	0.051932	0.145	2.5959e-09	WP_CHOLESTEROL_METABOLISM
HDL	GOMF_APOLIPOPROTEIN_A_I_BIND...	3	3.7663	0.053516	0.6346	1.5031e-09	GOMF_APOLIPOPROTEIN_A_I_BINDING
HDL	REACTOME_ASSEMBLY_OF_ACTIVE_...	12	1.8557	0.05272	0.31172	1.3453e-09	REACTOME_ASSEMBLY_OF_ACTIVE_LPL_AND_LIPC_LIPASE_COMPLEXES
HDL	GOBP_REVERSE_CHOLESTEROL_TRA...	9	2.1576	0.05309	0.35966	1.016e-09	GOBP_REVERSE_CHOLESTEROL_TRANSPORT
HDL	GOBP_PROTEIN_CONTAINING_COMP...4	20	1.4598	0.053527	0.23801	4.4106e-10	GOBP_PROTEIN_CONTAINING_COMPLEX_REMODELING
HDL	REACTOME_PLASMA_LIPOPROTEIN_...2	57	0.88664	0.054815	0.14128	1.7875e-10	REACTOME_PLASMA_LIPOPROTEIN_ASSEMBLY_REMODELING_AND_CLEARANCE
HDL	GOBP_TRIGLYCERIDE_RICH_LIPOP...2	4	3.3212	0.05449	0.52761	1.5832e-10	GOBP_TRIGLYCERIDE_RICH_LIPOPROTEIN_PARTICLE_REMODELING
HDL	GOBP_CHOLESTEROL_STORAGE	16	1.7311	0.05678	0.2688	6.1603e-11	GOBP_CHOLESTEROL_STORAGE
HDL	WP_FAMILIAL_HYPERLIPIDEMIA_T...3	8	2.4577	0.057018	0.37907	4.6206e-11	WP_FAMILIAL_HYPERLIPIDEMIA_TYPE_3
HDL	REACTOME_CHYLOMICRON_REMODEL...	2	5.0589	0.058693	0.77906	4.3288e-11	REACTOME_CHYLOMICRON_REMODELING
HDL	WP_LIPID_PARTICLES_COMPOSITI...	4	3.5756	0.058663	0.5499	4.0863e-11	WP_LIPID_PARTICLES_COMPOSITION
HDL	GOBP_PROTEIN_LIPID_COMPLEX_S...	33	1.2279	0.057809	0.18672	2.495e-11	GOBP_PROTEIN_LIPID_COMPLEX_SUBUNIT_ORGANIZATION
HDL	WP_FAMILIAL_HYPERLIPIDEMIA_T...1	10	2.2643	0.058728	0.33902	1.2455e-11	WP_FAMILIAL_HYPERLIPIDEMIA_TYPE_1
HDL	WP_STATIN_INHIBITION_OF_CHOL...	21	1.6171	0.060754	0.23641	4.118e-12	WP_STATIN_INHIBITION_OF_CHOLESTEROL_PRODUCTION
HDL	GOBP_ACYLGLYCEROL_HOMEOSTASIS	24	1.5566	0.062514	0.21619	3.1529e-13	GOBP_ACYLGLYCEROL_HOMEOSTASIS
HDL	REACTOME_PLASMA_LIPOPROTEIN_...4	21	1.7339	0.065143	0.23731	1.4441e-13	REACTOME_PLASMA_LIPOPROTEIN_REMODELING
HDL	WP_METABOLIC_PATHWAY_OF_LDL_...	12	2.4627	0.069964	0.31295	1.9075e-15	WP_METABOLIC_PATHWAY_OF_LDL_HDL_AND_TG_INCLUDING_DISEASES
IGF1	GOMF_DEMETHYLASE_ACTIVITY	31	0.8794	0.040129	0.19273	2.5429e-06	GOMF_DEMETHYLASE_ACTIVITY
IGF1	GOMF_PROTEIN_DEMETHYLASE_ACT...	23	1.1506	0.045239	0.22481	1.5612e-07	GOMF_PROTEIN_DEMETHYLASE_ACTIVITY
LDL	GOBP_RECEPTOR_MEDIATED_ENDOC...2	6	1.9583	0.039347	0.42941	2.5732e-06	GOBP_RECEPTOR_MEDIATED_ENDOCYTOSIS_INVOLVED_IN_CHOLESTEROL_TRANSPORT
LDL	GOMF_APOLIPOPROTEIN_BINDING	16	1.1804	0.038716	0.25676	2.1595e-06	GOMF_APOLIPOPROTEIN_BINDING
LDL	REACTOME_NR1H2_AND_NR1H3_MED...	40	0.76904	0.039851	0.16698	2.0738e-06	REACTOME_NR1H2_AND_NR1H3_MEDIATED_SIGNALING
LDL	GOMF_TOXIN_TRANSMEMBRANE_TRA...	9	1.6347	0.040223	0.35457	2.0265e-06	GOMF_TOXIN_TRANSMEMBRANE_TRANSPORTER_ACTIVITY
LDL	GOMF_QUATERNARY_AMMONIUM_GRO...2	16	1.1867	0.038925	0.25704	1.9636e-06	GOMF_QUATERNARY_AMMONIUM_GROUP_TRANSMEMBRANE_TRANSPORTER_ACTIVITY
LDL	GOBP_CHOLESTEROL_EFFLUX	38	0.78775	0.03979	0.17005	1.8218e-06	GOBP_CHOLESTEROL_EFFLUX
LDL	GOBP_STEROL_HOMEOSTASIS	66	0.60597	0.0403	0.12981	1.5339e-06	GOBP_STEROL_HOMEOSTASIS
LDL	GOBP_NOREPINEPHRINE_UPTAKE	8	1.8042	0.041856	0.38349	1.2836e-06	GOBP_NOREPINEPHRINE_UPTAKE
LDL	VILLANUEVA_LIVER_CANCER_KRT1...1	51	0.70164	0.041039	0.14664	8.6441e-07	VILLANUEVA_LIVER_CANCER_KRT19_DN
LDL	GOMF_MONOAMINE_TRANSMEMBRANE...	10	1.6414	0.042571	0.34174	7.8902e-07	GOMF_MONOAMINE_TRANSMEMBRANE_TRANSPORTER_ACTIVITY
LDL	REACTOME_NR1H3_NR1H2_REGULAT...	31	0.90941	0.041499	0.18923	7.7803e-07	REACTOME_NR1H3_NR1H2_REGULATE_GENE_EXPRESSION_LINKED_TO_CHOLESTEROL_TRANSPORT_AND_EFFLUX
LDL	GOBP_REGULATION_OF_STEROL_TR...	45	0.7728	0.042468	0.15575	3.5296e-07	GOBP_REGULATION_OF_STEROL_TRANSPORT
LDL	REACTOME_ABACAVIR_ADME	9	1.7438	0.042909	0.34633	2.416e-07	REACTOME_ABACAVIR_ADME
LDL	GOBP_SEROTONIN_UPTAKE	11	1.6917	0.046015	0.33504	2.2457e-07	GOBP_SEROTONIN_UPTAKE
LDL	GOBP_LOW_DENSITY_LIPOPROTEIN...3	5	2.4129	0.044259	0.47761	2.2127e-07	GOBP_LOW_DENSITY_LIPOPROTEIN_RECEPTOR_PARTICLE_METABOLIC_PROCESS
LDL	GOBP_LIPID_HOMEOSTASIS	121	0.49169	0.044194	0.09568	1.3994e-07	GOBP_LIPID_HOMEOSTASIS
LDL	WP_FAMILIAL_HYPERLIPIDEMIA_T...3	8	1.8909	0.043868	0.36784	1.3872e-07	WP_FAMILIAL_HYPERLIPIDEMIA_TYPE_3
LDL	REACTOME_ORGANIC_CATION_TRAN...	8	1.9398	0.045002	0.37309	1.0141e-07	REACTOME_ORGANIC_CATION_TRANSPORT
LDL	REACTOME_PLASMA_LIPOPROTEIN_...2	57	0.73969	0.04573	0.13707	3.4515e-08	REACTOME_PLASMA_LIPOPROTEIN_ASSEMBLY_REMODELING_AND_CLEARANCE
LDL	REACTOME_VLDL_ASSEMBLY	4	2.951	0.048417	0.53323	1.5899e-08	REACTOME_VLDL_ASSEMBLY
LDL	GOCC_HIGH_DENSITY_LIPOPROTEI...	14	1.5295	0.046932	0.27537	1.4161e-08	GOCC_HIGH_DENSITY_LIPOPROTEIN_PARTICLE
LDL	GOBP_LOW_DENSITY_LIPOPROTEIN...1	22	1.2716	0.048899	0.22435	7.3593e-09	GOBP_LOW_DENSITY_LIPOPROTEIN_PARTICLE_CLEARANCE
LDL	GOBP_REGULATION_OF_LOW_DENSI...	11	1.9036	0.051781	0.32147	1.6287e-09	GOBP_REGULATION_OF_LOW_DENSITY_LIPOPROTEIN_PARTICLE_CLEARANCE
LDL	GOBP_REGULATION_OF_PLASMA_LI...	51	0.88801	0.051941	0.14618	6.3594e-10	GOBP_REGULATION_OF_PLASMA_LIPOPROTEIN_PARTICLE_LEVELS
LDL	GOBP_EPINEPHRINE_TRANSPORT	5	2.873	0.052698	0.47018	5.0951e-10	GOBP_EPINEPHRINE_TRANSPORT
LDL	REACTOME_ABACAVIR_TRANSMEMBR...	5	2.8915	0.053037	0.46789	3.2935e-10	REACTOME_ABACAVIR_TRANSMEMBRANE_TRANSPORT
LDL	GOBP_REGULATION_OF_LIPOPROTE...3	15	1.6962	0.053871	0.27345	2.8432e-10	GOBP_REGULATION_OF_LIPOPROTEIN_PARTICLE_CLEARANCE
LDL	WP_FAMILIAL_HYPERLIPIDEMIA_T...2	11	1.9607	0.053332	0.31406	2.206e-10	WP_FAMILIAL_HYPERLIPIDEMIA_TYPE_2
LDL	GOBP_NEGATIVE_REGULATION_OF_...622	9	2.2457	0.055256	0.35586	1.4301e-10	GOBP_NEGATIVE_REGULATION_OF_STEROL_TRANSPORT
LDL	GOBP_PLASMA_LIPOPROTEIN_PART...	29	1.2394	0.054706	0.19425	9.1027e-11	GOBP_PLASMA_LIPOPROTEIN_PARTICLE_CLEARANCE
LDL	WP_LIPID_PARTICLES_COMPOSITI...	4	3.4231	0.056161	0.53335	7.1139e-11	WP_LIPID_PARTICLES_COMPOSITION
LDL	GOBP_NEGATIVE_REGULATION_OF_...365	6	2.8497	0.057259	0.43551	3.1063e-11	GOBP_NEGATIVE_REGULATION_OF_LOW_DENSITY_LIPOPROTEIN_PARTICLE_CLEARANCE
LDL	GOCC_PROTEIN_LIPID_COMPLEX	24	1.3948	0.056017	0.21107	2.01e-11	GOCC_PROTEIN_LIPID_COMPLEX
LDL	WP_METABOLIC_PATHWAY_OF_LDL_...	12	2.1083	0.059896	0.30366	2.0008e-12	WP_METABOLIC_PATHWAY_OF_LDL_HDL_AND_TG_INCLUDING_DISEASES
LDL	REACTOME_LDL_REMODELING	5	3.4116	0.062577	0.47618	4.0936e-13	REACTOME_LDL_REMODELING
LDL	GOBP_NEGATIVE_REGULATION_OF_...362	8	2.7523	0.063851	0.37675	1.4558e-13	GOBP_NEGATIVE_REGULATION_OF_LIPOPROTEIN_PARTICLE_CLEARANCE
LDL	WP_CHOLESTEROL_METABOLISM	56	1.0353	0.063441	0.14053	9.2244e-14	WP_CHOLESTEROL_METABOLISM
LDL	WP_STATIN_INHIBITION_OF_CHOL...	21	1.7864	0.067118	0.22918	3.439e-15	WP_STATIN_INHIBITION_OF_CHOLESTEROL_PRODUCTION
PHOS	GOBP_PHOSPHATE_ION_HOMEOSTAS...	16	1.2451	0.04084	0.2602	8.6204e-07	GOBP_PHOSPHATE_ION_HOMEOSTASIS
PHOS	GOBP_LEUKOTRIENE_TRANSPORT	7	1.9401	0.042104	0.39224	3.8251e-07	GOBP_LEUKOTRIENE_TRANSPORT
PHOS	GOMF_PHOSPHODIESTERASE_I_ACT...	5	2.4282	0.044539	0.46308	7.985e-08	GOMF_PHOSPHODIESTERASE_I_ACTIVITY
SHBG	KEGG_MATURITY_ONSET_DIABETES...	15	1.269	0.040305	0.27628	2.2008e-06	KEGG_MATURITY_ONSET_DIABETES_OF_THE_YOUNG
SHBG	KEGG_GLIOMA	57	0.76738	0.047444	0.14348	4.5065e-08	KEGG_GLIOMA
SHBG	KEGG_NON_SMALL_CELL_LUNG_CAN...	49	0.858	0.049196	0.15269	9.7586e-09	KEGG_NON_SMALL_CELL_LUNG_CANCER
SHBG	WP_NONSMALL_CELL_LUNG_CANCER	61	0.77932	0.049837	0.13697	6.4762e-09	WP_NONSMALL_CELL_LUNG_CANCER
TBIL	REACTOME_TRANSPORT_OF_ORGANI...	9	1.7516	0.0431	0.37395	1.4181e-06	REACTOME_TRANSPORT_OF_ORGANIC_ANIONS
TBIL	REACTOME_HEMOSTASIS	490	0.2412	0.043077	0.046867	1.344e-07	REACTOME_HEMOSTASIS
TPROT	GOBP_NATURAL_KILLER_CELL_DEG...	6	1.6772	0.0337	0.36578	2.285e-06	GOBP_NATURAL_KILLER_CELL_DEGRANULATION
TPROT	GOBP_POSITIVE_REGULATION_OF_...552	8	1.5392	0.035709	0.32118	8.3188e-07	GOBP_POSITIVE_REGULATION_OF_NATURAL_KILLER_CELL_PROLIFERATION
TPROT	WP_INTERACTIONS_OF_NATURAL_K...	18	1.2429	0.043236	0.23071	3.6326e-08	WP_INTERACTIONS_OF_NATURAL_KILLER_CELLS_IN_PANCREATIC_CANCER
TPROT	GOCC_FC_RECEPTOR_COMPLEX	3	2.6366	0.037463	0.48748	3.2277e-08	GOCC_FC_RECEPTOR_COMPLEX
TPROT	KEGG_LEISHMANIA_INFECTION	47	0.81085	0.045536	0.14861	2.4713e-08	KEGG_LEISHMANIA_INFECTION
TPROT	GOMF_IGG_BINDING	5	3.7365	0.068538	0.53192	1.1211e-12	GOMF_IGG_BINDING
TRIG	STEARMAN_TUMOR_FIELD_EFFECT_...	26	0.93024	0.038882	0.20574	3.0966e-06	STEARMAN_TUMOR_FIELD_EFFECT_UP
TRIG	WP_STATIN_INHIBITION_OF_CHOL...	21	1.0482	0.039382	0.23025	2.6734e-06	WP_STATIN_INHIBITION_OF_CHOLESTEROL_PRODUCTION
TRIG	GOBP_VERY_LOW_DENSITY_LIPOPR...2	3	2.8875	0.041029	0.61782	1.4925e-06	GOBP_VERY_LOW_DENSITY_LIPOPROTEIN_PARTICLE_CLEARANCE
TRIG	GOMF_TRIGLYCERIDE_BINDING	3	2.908	0.04132	0.61942	1.3466e-06	GOMF_TRIGLYCERIDE_BINDING
TRIG	WP_FAMILIAL_HYPERLIPIDEMIA_T...4	15	1.3406	0.042576	0.2708	3.7431e-07	WP_FAMILIAL_HYPERLIPIDEMIA_TYPE_4
TRIG	GOCC_TRIGLYCERIDE_RICH_PLASM...	9	1.7345	0.042679	0.34675	2.8679e-07	GOCC_TRIGLYCERIDE_RICH_PLASMA_LIPOPROTEIN_PARTICLE
TRIG	GOBP_TRIGLYCERIDE_RICH_LIPOP...1	2	3.5176	0.040811	0.70003	2.5478e-07	GOBP_TRIGLYCERIDE_RICH_LIPOPROTEIN_PARTICLE_CLEARANCE
TRIG	REACTOME_PLASMA_LIPOPROTEIN_...2	57	0.69193	0.042778	0.13754	2.4713e-07	REACTOME_PLASMA_LIPOPROTEIN_ASSEMBLY_REMODELING_AND_CLEARANCE
TRIG	GOBP_NEGATIVE_REGULATION_OF_...360	5	2.4243	0.044468	0.47246	1.4576e-07	GOBP_NEGATIVE_REGULATION_OF_LIPOPROTEIN_LIPASE_ACTIVITY
TRIG	GOBP_TRIGLYCERIDE_RICH_LIPOP...2	4	2.6888	0.044114	0.51362	8.3651e-08	GOBP_TRIGLYCERIDE_RICH_LIPOPROTEIN_PARTICLE_REMODELING
TRIG	GOBP_REGULATION_OF_VERY_LOW_...	2	4.0257	0.046706	0.75481	4.8913e-08	GOBP_REGULATION_OF_VERY_LOW_DENSITY_LIPOPROTEIN_PARTICLE_CLEARANCE
TRIG	REACTOME_CHYLOMICRON_REMODEL...	2	4.1305	0.047922	0.75841	2.6141e-08	REACTOME_CHYLOMICRON_REMODELING
TRIG	WP_FAMILIAL_HYPERLIPIDEMIA_T...1	10	1.8461	0.047881	0.33004	1.1314e-08	WP_FAMILIAL_HYPERLIPIDEMIA_TYPE_1
TRIG	REACTOME_ASSEMBLY_OF_ACTIVE_...	12	1.7456	0.049591	0.30335	4.4392e-09	REACTOME_ASSEMBLY_OF_ACTIVE_LPL_AND_LIPC_LIPASE_COMPLEXES
TRIG	GOBP_ACYLGLYCEROL_HOMEOSTASIS	24	1.2255	0.049217	0.21049	2.9692e-09	GOBP_ACYLGLYCEROL_HOMEOSTASIS
TRIG	GOCC_CHYLOMICRON	6	2.5865	0.051969	0.41866	3.3338e-10	GOCC_CHYLOMICRON
TRIG	REACTOME_PLASMA_LIPOPROTEIN_...4	21	1.5169	0.056993	0.231	2.6578e-11	REACTOME_PLASMA_LIPOPROTEIN_REMODELING
URT	BOYAULT_LIVER_CANCER_SUBCLAS...3	15	1.2668	0.040233	0.26802	1.1528e-06	BOYAULT_LIVER_CANCER_SUBCLASS_G12_DN
URT	GOMF_URATE_TRANSMEMBRANE_TRA...	4	2.7406	0.044964	0.51932	6.6514e-08	GOMF_URATE_TRANSMEMBRANE_TRANSPORTER_ACTIVITY
URT	GOBP_URATE_METABOLIC_PROCESS	11	2.8241	0.076819	0.32011	6.2408e-19	GOBP_URATE_METABOLIC_PROCESS

## Sheet: Table S3
Trait	Tissue	Beta	SD	SE	P-Valu	Full name
ALB	Liver	0.032377	0.056875	0.0086198	8.6679e-05	Liver
ALB	Pancreas	0.044798	0.072861	0.01164	5.9672e-05	Pancreas
ALP	Liver	0.047012	0.082585	0.0091558	1.4335e-07	Liver
APOA	Liver	0.032151	0.056479	0.0089198	0.00015697	Liver
APOB	Kidney_Medulla	0.040397	0.072852	0.012743	0.00076373	Kidney_Medulla
APOB	Kidney_Cortex	0.043242	0.073825	0.012517	0.00027628	Kidney_Cortex
APOB	Pancreas	0.04281	0.069627	0.011942	0.00016931	Pancreas
APOB	Stomach	0.068121	0.12095	0.016769	2.4437e-05	Stomach
APOB	Liver	0.038432	0.067504	0.0088416	6.9632e-06	Liver
AST	Lung	0.039926	0.076211	0.012394	0.00063905	Lung
AST	Whole_Blood	0.025444	0.04512	0.0077238	0.00049479	Whole_Blood
BMI	Brain_Frontal_Cortex_BA9	0.029969	0.053952	0.0092004	0.00056367	Brain_Frontal_Cortex_BA9
CAL	Pancreas	0.038969	0.063381	0.011633	0.00040529	Pancreas
CAL	Small_Intestine_Terminal_Ile...	0.044786	0.080868	0.013227	0.00035572	Small_Intestine_Terminal_Ileum
CAL	Vagina	0.050754	0.095414	0.01485	0.00031677	Vagina
CAL	Liver	0.031128	0.054682	0.0086136	0.00015143	Liver
CAL	Prostate	0.059008	0.10968	0.016115	0.00012575	Prostate
CAL	Thyroid	0.048069	0.093859	0.01304	0.00011425	Thyroid
CAL	Kidney_Medulla	0.05251	0.0947	0.012408	1.1673e-05	Kidney_Medulla
CAL	Kidney_Cortex	0.052733	0.090038	0.012188	7.6263e-06	Kidney_Cortex
CAL	Minor_Salivary_Gland	0.061793	0.11285	0.013085	1.1781e-06	Minor_Salivary_Gland
CHO	Stomach	0.056346	0.10004	0.016518	0.00032447	Stomach
CHO	Small_Intestine_Terminal_Ile...	0.056737	0.10244	0.013371	1.1085e-05	Small_Intestine_Terminal_Ileum
CHO	Colon_Transverse	0.071517	0.12875	0.016115	4.5825e-06	Colon_Transverse
CHO	Liver	0.04298	0.075493	0.0087059	4.0192e-07	Liver
CREA	Liver	0.028635	0.050301	0.0088666	0.0006216	Liver
CREA	Kidney_Medulla	0.061251	0.11046	0.012769	8.1504e-07	Kidney_Medulla
CREA	Kidney_Cortex	0.069845	0.11925	0.012539	1.2966e-08	Kidney_Cortex
DBP	Cervix_Endocervix	0.055179	0.10762	0.015732	0.0002269	Cervix_Endocervix
GGT	Stomach	0.060842	0.10803	0.01702	0.0001759	Stomach
GGT	Liver	0.032442	0.05699	0.0089742	0.00015071	Liver
GGT	Kidney_Medulla	0.052247	0.094225	0.012929	2.6756e-05	Kidney_Medulla
GGT	Kidney_Cortex	0.056639	0.096706	0.012698	4.1219e-06	Kidney_Cortex
LDL	Kidney_Cortex	0.04189	0.071516	0.012327	0.00034024	Kidney_Cortex
LDL	Stomach	0.058546	0.10395	0.016517	0.00019737	Stomach
LDL	Small_Intestine_Terminal_Ile...	0.048878	0.088253	0.013373	0.00012911	Small_Intestine_Terminal_Ileum
LDL	Colon_Transverse	0.063419	0.11417	0.016118	4.1867e-05	Colon_Transverse
LDL	Liver	0.036736	0.064526	0.008708	1.2371e-05	Liver
SBP	Fallopian_Tube	0.051637	0.098691	0.016032	0.00064047	Fallopian_Tube
SBP	Cervix_Endocervix	0.054725	0.10674	0.015625	0.00023135	Cervix_Endocervix
TBIL	Liver	0.030765	0.054045	0.0085685	0.00016562	Liver
TPROT	Vagina	0.05033	0.094616	0.015222	0.00047387	Vagina
TPROT	Bladder	0.060698	0.11625	0.017729	0.00030994	Bladder
TPROT	Stomach	0.059808	0.10619	0.016744	0.00017782	Stomach
TPROT	Breast_Mammary_Tissue	0.062154	0.11763	0.017223	0.00015446	Breast_Mammary_Tissue
TPROT	Spleen	0.039737	0.077767	0.010072	4.0095e-05	Spleen
TPROT	Lung	0.050041	0.095516	0.012565	3.4284e-05	Lung
TPROT	Colon_Transverse	0.065765	0.1184	0.016339	2.8636e-05	Colon_Transverse
TPROT	Small_Intestine_Terminal_Ile...	0.067033	0.12104	0.013551	3.8179e-07	Small_Intestine_Terminal_Ileum
URA	Liver	0.026718	0.046934	0.0084329	0.00076847	Liver
URA	Small_Intestine_Terminal_Ile...	0.050211	0.090665	0.012946	5.2815e-05	Small_Intestine_Terminal_Ileum
URA	Kidney_Medulla	0.067308	0.12139	0.012141	1.5076e-08	Kidney_Medulla
URA	Kidney_Cortex	0.066693	0.11387	0.011925	1.1409e-08	Kidney_Cortex
URT	Kidney_Medulla	0.044574	0.080388	0.012658	0.00021536	Kidney_Medulla
URT	Kidney_Cortex	0.062042	0.10593	0.012427	3.021e-07	Kidney_Cortex
TPROT	Bladder	0.060698	0.11625	0.017729	0.00030994	Bladder
TPROT	Stomach	0.059808	0.10619	0.016744	0.00017782	Stomach
TPROT	Breast_Mammary_Tissue	0.062154	0.11763	0.017223	0.00015446	Breast_Mammary_Tissue
TPROT	Spleen	0.039737	0.077767	0.010072	4.0095e-05	Spleen
TPROT	Lung	0.050041	0.095516	0.012565	3.4284e-05	Lung
TPROT	Colon_Transverse	0.065765	0.1184	0.016339	2.8636e-05	Colon_Transverse
TPROT	Small_Intestine_Terminal_Ile...	0.067033	0.12104	0.013551	3.8179e-07	Small_Intestine_Terminal_Ileum
URA	Liver	0.026718	0.046934	0.0084329	0.00076847	Liver
URA	Small_Intestine_Terminal_Ile...	0.050211	0.090665	0.012946	5.2815e-05	Small_Intestine_Terminal_Ileum
URA	Kidney_Medulla	0.067308	0.12139	0.012141	1.5076e-08	Kidney_Medulla
URA	Kidney_Cortex	0.066693	0.11387	0.011925	1.1409e-08	Kidney_Cortex
URT	Kidney_Medulla	0.044574	0.080388	0.012658	0.00021536	Kidney_Medulla
URT	Kidney_Cortex	0.062042	0.10593	0.012427	3.021e-07	Kidney_Cortex

## Sheet: Table S4
Trait	Tissue	Beta	SD	SE	P-Valu	Full name
ALB	Kidney_Medulla	0.037516	0.067108	0.011944	0.00084371	Kidney_Medulla
ALB	Kidney_Cortex	0.048802	0.082731	0.011676	1.468e-05	Kidney_Cortex
ALP	Liver	0.032324	0.056548	0.0088441	0.00012911	Liver
ALT	Liver	0.034215	0.059856	0.0082366	1.6429e-05	Liver
APOB	Liver	0.03831	0.06702	0.008548	3.7304e-06	Liver
CHO	Liver	0.035382	0.061898	0.0083584	1.1596e-05	Liver
CREA	Kidney_Cortex	0.042487	0.072026	0.012001	0.00020057	Kidney_Cortex
GGT	Thyroid	0.041285	0.079627	0.013016	0.00075859	Thyroid
GGT	Liver	0.038601	0.067527	0.008578	3.4265e-06	Liver
LDL	Liver	0.031896	0.055799	0.0083924	7.2471e-05	Liver
SHBG	Liver	0.030225	0.052876	0.0086607	0.00024236	Liver
URA	Colon_Sigmoid	0.048724	0.092912	0.015586	0.00088745	Colon_Sigmoid
