# Supplementary material for: Transforming polygenic risk prediction: functional annotation and digital twin modeling with whole-exome sequencing
Source: Research Square preprint supplement (doi:10.21203/rs.3.rs-6169446/v1), 2025-03-10
Supplement: Supplementary file 6 [file 54cf091c5357b4c9bca2a7b6.xlsx]

## Sheet: Description
Supplementary Data 5	Supplementary information on fine-mapping analyses
Table S1	Fine-mapping results from the exome-based summary statistics using FINEMAP6 (PolyFun7). Summary statistics from the exome-based reference dataset (UK Biobank). Association results from the generated testing regions (± 500 kb) using the independent loci detected by FUMA (rsID: dbSNP identifier, Ref: reference allele, Alt: alternative allele, PIP: posterior probability, SD: standard deviation).
Table S2	Fine-mapping results from the imputed array-based summary statistics using FINEMAP6 (PolyFun7). Summary statistics from the imputed array-based reference dataset (UK Biobank). Association results from the generated testing regions (± 500 kb) using the independent loci detected by FUMA (rsID: dbSNP identifier, Ref: reference allele, Alt: alternative allele, PIP: posterior probability, SD: standard…

## Sheet: Table S1
rsID	Chromosome	Position (hg19)	Alt	Ref	PIP	Estimate (mean)	SD	Distance from center	Credible set	Measurement	Genes	Feature type (VEP)
rs10016702	4	10447640	A	G	1	-0.0417201	0.00381475	1541723	5	URT	ZNF518B	missense, variant, downstream, gene
rs10144543	14	103574714	C	T	1	-0.075964	0.00366348	1121854	1	GGT	EXOC3L4	intron, variant, downstream, gene, NMD, transcript, non, coding
rs10178552	2	25973309	C	T	1	-0.0270983	0.00369902	1758	1	IGF1	ASXL2	intron, variant
rs10199278	2	234160669	G	C	1	-0.0294163	0.00357188	358948	6	TBIL	ATG16L1	intron, variant, NMD, transcript, non, coding
rs10414643	19	50097784	T	C	1	0.0401235	0.00379995	3752	1	ALB	PRRG2, PRR12, NOSIP	downstream, gene, variant, synonymous, upstream
rs1042522	17	7579472	C	G	1	0.0875006	0.00395467	446001	1	SHBG	TP53	missense, variant, upstream, gene, non, coding, transcript, exon, intron
rs1044482	11	71155171	T	C	1	0.0563135	0.00366412	6461	1	VITD	DHCR7, RP11, 660L16.2	synonymous, variant, splice, region, polypyrimidine, tract, intron, upstream, gene
rs10455097	6	74493432	C	A	1	-0.0280848	0.00366959	343787	1	CAL	CD109	missense, variant, splice, region
rs1047891	2	211540507	C	A	1	-0.0376389	0.00369492	109141	1	CREA	CPS1	missense, variant, non, coding, transcript, exon
rs1048603	2	234394487	G	A	1	-0.0258163	0.00362096	125130	9	TBIL	USP40	missense, variant, downstream, gene, 3, prime, UTR, NMD, transcript, upstream, non, coding, exon
rs1053878	9	136131651	G	A	1	0.0278212	0.00380857	104980	2	ALP	ABO, RP11, 430N14.4	non, coding, transcript, exon, variant, upstream, gene
rs1064725	19	45422561	T	G	1	0.0255692	0.00356813	409921	3	APOB	APOC1	3, prime, UTR, variant, downstream, gene, NMD, transcript
rs10821877	10	52603659	C	T	1	-0.0307914	0.00366856	903360	1	URT	A1CF	intron, variant, non, coding, transcript
rs10889335	1	62960101	A	G	1	0.0282139	0.00367469	435883	1	LDL	DOCK7	synonymous, variant, non, coding, transcript, exon
rs10998724	10	71098376	T	G	1	-0.0266358	0.00386928	600818	3	HBA1C	HK1	intron, variant, non, coding, transcript, exon
rs11076256	16	58752466	C	T	1	0.0281432	0.00367804	868111	1	AST	GOT2	missense, variant, downstream, gene, upstream, non, coding, transcript, exon
rs11100802	4	144621199	A	G	1	-0.0427405	0.00366714	30045	1	HBA1C	FREM3, RP13, 578N3.3	synonymous, variant, upstream, gene
rs111653425	17	19474875	C	T	1	-0.0312046	0.00366839	1329482	1	CREA	SLC47A1, RP11, 1113L8.1	missense, variant, intron, non, coding, transcript, exon, downstream, gene, upstream
rs11231825	11	64360274	C	T	1	-0.0284033	0.00397332	123297	2	URT	SLC22A12	synonymous, variant, 5, prime, UTR
rs1130564	1	21952884	G	A	1	0.068289	0.00391986	322619	2	ALP	RAP1GAP	synonymous, variant, 5, prime, UTR, non, coding, transcript, exon, upstream, gene, NMD
rs1145086	15	45654327	A	G	1	-0.0492336	0.00366582	4193741	1	CREA	GATM	synonymous, variant, downstream, gene, non, coding, transcript, exon
rs11591147	1	55505647	G	T	1	0.0772281	0.00387888	33190	1	LDL	PCSK9	missense, variant, upstream, gene
rs11601507	11	5701074	C	A	1	-0.0300363	0.00371397	9365	1	ALP	TRIM5	missense, variant, downstream, gene, NMD, transcript, upstream, non, coding, exon
rs11676272	2	25141538	A	G	1	-0.0283197	0.0036691	94912	1	BMI	ADCY3	missense, variant
rs1169289	12	121416622	C	G	1	-0.0340823	0.00385995	135906	1	ALP	HNF1A, AS1	synonymous, variant, intron, non, coding, transcript, NMD
rs11714515	3	58410431	A	G	1	-0.0344291	0.0041419	64171	1	AST	PDHB, PXK, RP11, 802O23.3	downstream, gene, variant, intron, NMD, transcript, upstream
rs11795137	9	91606522	T	A	1	0.0294266	0.00367518	64660	1	HBA1C	C9orf47, S1PR3	synonymous, variant, 5, prime, UTR, upstream, gene
rs11820589	11	116633862	G	A	1	-0.0307976	0.00416943	71298	1	LDL	BUD13	missense, variant, upstream, gene
rs11887534	2	44066247	G	C	1	0.0306693	0.00387977	20357	1	LDL	ABCG5, ABCG8	upstream, gene, variant, missense
rs1229984	4	100239319	C	T	1	0.0251326	0.00367004	356034	1	LDL	ADH1B	missense, variant, non, coding, transcript, exon, 3, prime, UTR, NMD
rs12468017	2	234698097	T	C	1	0.195232	0.00430214	178480	2	TBIL	MROH2A	intron, variant, non, coding, transcript
rs12691202	2	21249716	C	T	1	0.0252083	0.00385463	219751	2	APOB	APOB	missense, variant
rs13266634	8	118184783	C	T	1	0.0332934	0.00366841	232360	1	HBA1C	SLC30A8	missense, variant
rs1334576	6	7211818	G	A	1	-0.0260627	0.00377274	162978	1	URT	RREB1	missense, variant, downstream, gene, non, coding, transcript, exon
rs1417938	1	159684186	T	A	1	-0.0752299	0.00372065	902705	2	CRP	CRP	intron, variant, upstream, gene
rs142039417	17	61988614	A	T	1	-0.0254159	0.00369181	43958	1	IGF1	CSHL1	5, prime, UTR, variant, upstream, gene, intron, non, coding, transcript, exon
rs142217338	2	234728158	C	A	1	-0.0263548	0.0034372	208541	8	TBIL	MROH2A	intron, variant
rs148144831	4	9157338	T	G	1	-0.0336555	0.00372488	251421	6	URT	FAM86KP	intron, variant, non, coding, transcript
rs1500481	2	234702459	C	T	1	0.0309054	0.00476092	182842	7	TBIL	MROH2A	missense, variant, upstream, gene, non, coding, transcript, exon
rs150539196	8	81399180	A	G	1	-0.0233963	0.00367256	26046	1	SHBG	ZBTB10, Y, RNA	intron, variant, synonymous, upstream, gene
rs1532625	16	57005301	C	T	1	0.0383914	0.00396551	43392	1	LDL	CETP	splice, region, variant, intron, non, coding, transcript
rs157581	19	45395714	T	C	1	-0.06546	0.00393465	213246	2	LDL	PVRL2, TOMM40, CTB, 129P6.4	downstream, gene, variant, synonymous, upstream
rs1635553	12	48375568	A	G	1	-0.0291425	0.00388927	183372	1	HBA1C	COL2A1	synonymous, variant, non, coding, transcript, exon, upstream, gene
rs167479	19	11526765	G	T	1	0.0264506	0.00367827	4523	1	SBP	CCDC151, RGL3	downstream, gene, variant, missense, intron, non, coding, transcript, exon, NMD, synonymous, upstream
rs169068	16	1129872	T	C	1	0.0278517	0.00366889	2469806	1	IGF1	SSTR5, AS1	missense, variant, intron, upstream, gene
rs16923270	12	21015815	T	G	1	0.0284987	0.00387535	141254	3	TBIL	SLCO1B3, LST3, SLCO1B7	intron, variant, downstream, gene
rs17311358	6	24580036	G	A	1	0.0394577	0.00374715	43083	1	ALP	KIAA0319	intron, variant
rs17360994	1	27278573	T	C	1	0.0290437	0.00367177	7716	1	SHBG	C1orf172	missense, variant
rs174528	11	61543499	T	C	1	-0.0372535	0.00368585	90956	1	ALP	MYRF, TMEM258	intron, variant, upstream, gene, non, coding, transcript
rs17513135	1	40035686	C	T	1	0.0265964	0.00366953	20741	1	HDL	SNORA55, PABPC4, RP11, 69E11.8	upstream, gene, variant, splice, polypyrimidine, tract, intron, non, coding, transcript, downstream, NMD
rs17580	14	94847262	T	A	1	-0.0309464	0.00368736	58835	2	ALB	SERPINA1	missense, variant, NMD, transcript, downstream, gene
rs1767430	1	21887290	C	A	1	-0.032628	0.00420648	257025	4	ALP	ALPL	intron, variant, non, coding, transcript
rs17862888	2	234698126	C	G	1	-0.0580092	0.0035368	178509	3	TBIL	MROH2A	splice, polypyrimidine, tract, variant, intron, non, coding, transcript
rs17863803	2	234688327	A	G	1	0.0455354	0.00377077	168710	4	TBIL	MROH2A	synonymous, variant, 5, prime, UTR, non, coding, transcript, exon
rs1800777	16	57017319	G	A	1	0.041714	0.00384285	138128	3	APOA	CETP	missense, variant
rs1800947	1	159683438	C	G	1	0.0775594	0.0037069	901957	1	CRP	CRP	synonymous, variant, splice, region, polypyrimidine, tract, intron, non, coding, transcript, exon
rs1800961	20	43042364	C	T	1	0.0367576	0.00366744	781578	1	APOA	HNF4A	missense, variant, 3, prime, UTR, NMD, transcript
rs1800978	9	107665978	C	G	1	0.046323	0.0036902	257570	2	APOA	ABCA1	intron, variant, 5, prime, UTR
rs1801253	10	115805056	C	G	1	0.0245605	0.003675	406164	1	SBP	ADRB1	missense, variant
rs1801272	19	41354533	A	T	1	-0.0328464	0.00414416	10254	1	ALP	CYP2A6, CTC, 490E21.12	missense, variant, non, coding, transcript, exon, upstream, gene, 3, prime, UTR, NMD, intron
rs1801274	1	161479745	G	A	1	0.0335887	0.0045035	208301	1	TPROT	FCGR2A, RP11, 25K21.6	missense, variant, upstream, gene, NMD, transcript, non, coding, exon, downstream, 3, prime, UTR
rs1801689	17	64210580	A	C	1	-0.023973	0.00366897	391358	1	APOB	APOH	missense, variant, downstream, gene, intron
rs1805100	8	76476396	G	A	1	-0.0332601	0.00366888	23369	1	URT	HNF4G	3, prime, UTR, variant
rs1827293	1	21795388	G	A	1	-0.0916656	0.00393956	165123	1	ALP	NBPF3	missense, variant, splice, region, intron, upstream, gene, downstream
rs186765281	22	25010855	A	G	1	0.0661958	0.00364922	738254	3	GGT	GGT1, SNRPD3	missense, variant, downstream, gene, NMD, transcript, intron, non, coding, exon
rs186808413	11	117042408	C	T	1	-0.0328143	0.00390168	479844	2	APOA	PAFAH1B2	downstream, gene, variant, intron, non, coding, transcript, missense
rs1926739	10	18270422	G	A	1	0.0736325	0.00410654	7164	1	AST	SLC39A12	intron, variant
rs1965024	16	51173559	A	G	1	-0.0326999	0.00379574	102165	1	CRP	SALL1	synonymous, variant, intron, downstream, gene
rs200426740	22	24985742	C	A	1	0.0709957	0.00369145	713141	2	GGT	GGT1, FAM211B, SNRPD3	intron, variant, NMD, transcript, non, coding, exon
rs202200760	19	17346854	G	C	1	-0.0399627	0.00366709	15885	1	SHBG	NR2F6, AC010646.3	missense, variant
rs2047866	15	76136194	T	C	1	0.027045	0.00367383	106525	1	CREA	UBE2Q2	splice, region, variant, intron, NMD, transcript, upstream, gene
rs2066714	9	107586753	T	C	1	-0.0284334	0.00373849	178345	4	APOA	ABCA1	missense, variant, downstream, gene
rs2071502	17	7414958	C	G	1	0.0552231	0.00425493	281487	2	SHBG	POLR2A	intron, variant, downstream, gene, non, coding, transcript
rs2072860	22	37470604	A	G	1	-0.0496661	0.00366708	35162	1	HBA1C	TMPRSS6	intron, variant
rs2072931	1	25747399	T	G	1	0.0240439	0.00367015	508854	1	APOB	RHCE	upstream, gene, variant, intron, non, coding, transcript, exon
rs2073618	8	119964052	G	C	1	-0.0312385	0.00370655	744771	1	ALP	TNFRSF11B	missense, variant, NMD, transcript
rs2073787	23	109694685	T	A	1	0.0234267	0.00367485	1095873	1	LDL	RGAG1	synonymous, variant, downstream, gene
rs2075570	1	155182164	T	C	1	-0.0274177	0.00382466	143621	1	GGT	GBAP1, MTX1, THBS3, RP11, 263K19.6	downstream, gene, variant, splice, polypyrimidine, tract, intron, upstream, NMD, transcript, non, coding
rs2228671	19	11210912	C	T	1	0.0792963	0.00372258	1039	1	LDL	LDLR	synonymous, variant, non, coding, transcript, exon
rs2230808	9	107562804	C	T	1	0.03306	0.00387746	154396	3	APOA	ABCA1	missense, variant
rs2231142	4	89052323	G	T	1	-0.0934072	0.00365913	399946	1	URT	ABCG2	missense, variant, downstream, gene
rs2232015	1	107599258	A	T	1	-0.0325878	0.00366787	363168	1	SHBG	PRMT6	upstream, gene, variant
rs2233368	17	47293848	C	T	1	-0.0279269	0.00389392	2027919	1	SHBG	ABI3	intron, variant, upstream, gene
rs2235501	6	24489691	G	C	1	0.0362293	0.00385417	133428	2	ALP	GPLD1	missense, variant, non, coding, transcript, exon
rs2236653	11	126283785	C	T	1	-0.040716	0.00383898	234399	1	ALP	ST3GAL4	intron, variant, non, coding, transcript, NMD
rs2241474	4	10086015	C	T	1	0.167311	0.00397643	1180098	1	URT	WDR1	intron, variant, non, coding, transcript, downstream, gene
rs2274159	9	117166246	A	G	1	0.0344094	0.00366798	57393	1	ALT	DFNB31	missense, variant
rs2275545	9	107651526	A	G	1	0.052449	0.00369139	243118	1	APOA	ABCA1	intron, variant
rs2292644	17	76394449	T	C	1	0.0249188	0.00366868	169615	1	HDL	PGS1, SNORA30	intron, variant, upstream, gene, non, coding, transcript, downstream, NMD
rs2293889	8	116599199	G	T	1	0.0230472	0.0036688	831479	1	APOA	TRPS1	intron, variant, downstream, gene
rs2298475	11	126278203	T	C	1	0.0255296	0.00379618	228817	2	ALP	ST3GAL4	splice, region, variant, synonymous, non, coding, transcript, exon, 5, prime, UTR, downstream, gene, NMD, upstream
rs2303401	4	10117638	G	C	1	-0.0529439	0.00385646	1211721	2	URT	WDR1, RNA5SP155	intron, variant, upstream, gene, non, coding, transcript, exon
rs2305744	19	35556123	A	G	1	0.0500252	0.00397598	188422	1	ALB	HPN, AS1	intron, variant, non, coding, transcript
rs2451217	17	80710278	G	C	1	-0.0400166	0.00382344	4589442	2	HBA1C	FN3K, TBCD	downstream, gene, variant, intron
rs2613522	17	76120065	A	G	1	-0.0574837	0.00367237	771	1	HBA1C	TMC6	splice, donor, 5th, base, variant, intron, non, coding, transcript, downstream, gene, upstream
rs268	8	19813529	A	G	1	0.0419471	0.00366554	139670	2	APOA	LPL	missense, variant, downstream, gene
rs2699426	4	3478323	T	C	1	-0.0250422	0.00366975	2494526	1	ALB	DOK7	intron, variant, non, coding, transcript, downstream, gene
rs2738238	5	39377418	G	A	1	0.0315506	0.00386835	119166	1	CREA	DAB2, C9	intron, variant, non, coding, transcript, upstream, gene
rs2744583	6	24505030	A	G	1	-0.0271795	0.00399374	118089	4	ALP	ALDH5A1	intron, variant
rs28360442	12	121570940	G	C	1	-0.0287796	0.00373443	554093	2	CRP	P2RX7	intron, variant, NMD, transcript, non, coding
rs2854746	7	45960645	G	C	1	0.0333426	0.00368339	412745	1	IGF1	IGFBP3	missense, variant, intron, upstream, gene
rs2862954	10	101912064	C	T	1	-0.0461213	0.0039237	211507	1	ALT	ERLIN1	downstream, gene, variant, missense
rs2868941	4	10509699	C	T	1	0.0501105	0.00389595	1603782	4	URT	CLNK	intron, variant
rs28917234	11	117186506	G	A	1	-0.0283146	0.00379942	623942	4	TRIG	BACE1, AP000892.4, CEP164	synonymous, variant, downstream, gene, non, coding, transcript, exon, intron
rs2974339	8	42397529	C	T	1	-0.0302344	0.00367225	2486565	1	HBA1C	SLC20A2, SMIM19, RP11, 503E24.2	upstream, gene, variant, intron, NMD, transcript, non, coding
rs301	8	19816934	T	C	1	-0.0549861	0.00366358	136265	1	APOA	LPL	intron, variant
rs3184504	12	111884608	C	T	1	-0.0397753	0.0036717	79885	1	DBP	SH2B3	missense, variant, downstream, gene
rs3213225	11	2156536	A	G	1	0.031765	0.00398299	2460668	2	IGF1	IGF2, INS, MIR483	intron, variant, NMD, transcript, upstream, gene
rs34006803	3	122277268	G	A	1	-0.0526194	0.00496678	492934	1	CAL	PARP9	missense, variant, intron
rs34345884	3	49760431	G	C	1	-0.0237462	0.0036994	11582	1	HBA1C	GMPPB, AMIGO3, IP6K1, RNF123	missense, variant, upstream, gene, downstream, non, coding, transcript, exon, 5, prime, UTR
rs34481144	11	320836	T	C	1	-0.0260681	0.00368849	2435522	2	ALP	IFITM3, RP11, 326C3.11, 326C3.10, 326C3.14, 326C3.13	5, prime, UTR, variant, downstream, gene, intron, upstream, non, coding, transcript
rs34755188	9	104433255	C	T	1	-0.0243405	0.0036693	441857	1	ALP	GRIN3A	missense, variant
rs35619711	17	59482169	G	C	1	-0.0311224	0.00366983	291867	1	CREA	TBX2, RP11, 332H18.5, 332H18.4	intron, variant, NMD, transcript, non, coding, exon, upstream, gene
rs35995150	1	113264930	C	G	1	-0.0318941	0.00369682	35937	1	CREA	FAM19A3, RP11, 426L16.9	synonymous, variant, downstream, gene
rs36656	19	54664752	A	C	1	-0.0257281	0.00367175	297533	1	ALP	LENG1, TMC4	upstream, gene, variant, synonymous, non, coding, transcript, exon, downstream
rs3741211	11	2169110	A	G	1	-0.045116	0.00427336	2448094	1	IGF1	IGF2, INS, AS	intron, variant, NMD, transcript, non, coding, exon, downstream, gene
rs3744867	18	56149048	A	G	1	-0.0253231	0.00370433	265160	1	ALT	ALPK2	3, prime, UTR, variant
rs3746575	20	43058096	G	C	1	0.0248813	0.00366951	765846	1	SHBG	HNF4A, AL132772.1, RP5, 1013A22.5	intron, variant, NMD, transcript, downstream, gene, upstream
rs3755322	2	234621787	C	G	1	0.0433686	0.00386	102170	5	TBIL	UGT1A6, UGT1A10, UGT1A9, UGT1A5, UGT1A7, UGT1A8, AC114812.8	intron, variant, missense, upstream, gene, NMD, transcript, non, coding
rs3760370	17	45695832	T	C	1	0.024973	0.00367351	429903	2	SHBG	NPEPPS, RP11, 580I16.2	intron, variant, downstream, gene, NMD, transcript, non, coding
rs3775327	4	148985720	C	T	1	0.0243037	0.00366958	25411	1	ALP	ARHGAP10	intron, variant, non, coding, transcript, upstream, gene, downstream
rs3798220	6	160961137	T	C	1	-0.02588	0.00375566	562023	1	LDL	LPA	missense, variant
rs3803798	17	7460517	C	G	1	0.0320148	0.00422621	327046	5	SHBG	TNFSF12, TNFSF13, SENP3	synonymous, variant, intron, upstream, gene, 3, prime, UTR, NMD, transcript, non, coding, exon
rs3895559	1	109813020	G	A	1	-0.0401547	0.00384361	1326981	1	LDL	CELSR2	intron, variant, downstream, gene, non, coding, transcript, exon, upstream
rs4061675	1	21793527	C	T	1	0.0623973	0.00393623	163262	3	ALP	NBPF3	5, prime, UTR, variant, intron, non, coding, transcript
rs4074905	11	2189185	A	G	1	-0.0342249	0.00366775	2445129	1	IGF1	TH	intron, variant, NMD, transcript, upstream, gene, non, coding
rs4084164	11	62201458	G	A	1	-0.025758	0.00366926	11952	1	GGT	AHNAK	intron, variant, non, coding, transcript
rs41278174	16	16259596	G	A	1	-0.0307634	0.00366829	17906	1	PHOS	ABCC6	missense, variant, 3, prime, UTR, NMD, transcript
rs41287288	1	51760147	T	C	1	-0.0272147	0.00367589	560243	1	CAL	TTC39A	synonymous, variant, downstream, gene, non, coding, transcript, exon
rs41301139	18	43262408	G	A	1	-0.0267511	0.00370057	630500	1	URA	SLC14A2, RP11, 116O18.3	missense, variant, intron, non, coding, transcript
rs4379723	10	64963449	T	C	1	-0.0684986	0.00366193	6998	1	ALP	JMJD1C	intron, variant
rs45505795	14	94756943	G	C	1	-0.0348653	0.00370156	31484	1	ALB	SERPINA10	5, prime, UTR, variant, synonymous
rs470926	5	72364673	G	A	1	-0.0245977	0.00367685	64260	1	ALB	FCHO2	intron, variant, non, coding, transcript
rs4917	3	186337713	C	T	1	0.0250659	0.003669	32689	1	CAL	AHSG	missense, variant, downstream, gene
rs4962040	9	136133531	A	G	1	-0.0914362	0.00386816	106860	1	ALP	ABO, RP11, 430N14.4	splice, polypyrimidine, tract, variant, intron, non, coding, transcript, upstream, gene
rs4988483	16	1129010	C	A	1	0.0479551	0.00424825	2470237	1	IGF1	SSTR5, AS1	missense, variant, upstream, gene
rs535696610	22	24951046	G	C	1	-0.0358815	0.00429283	678445	5	GGT	SNRPD3, GUCD1	upstream, gene, variant, 5, prime, UTR, NMD, transcript, intron, non, coding, exon
rs539858	11	116729013	T	C	1	-0.034029	0.00398021	166449	1	APOA	SIK3, APOA1, AS	synonymous, variant, 3, prime, UTR, NMD, transcript, downstream, gene, non, coding, exon
rs5400	3	170732300	G	A	1	0.0254169	0.00366974	521889	1	HBA1C	SLC2A2	missense, variant, intron, NMD, transcript
rs55764662	17	42155742	C	T	1	0.0282195	0.00367664	23225	1	HDL	HDAC5, G6PC3	3, prime, UTR, variant, downstream, gene
rs55772007	12	102545563	A	G	1	-0.0321158	0.00437736	614815	1	IGF1	PARPBP	intron, variant, 3, prime, UTR, NMD, transcript, non, coding, exon, downstream, gene, synonymous
rs55774724	6	33589332	C	T	1	0.0336482	0.00368529	822	1	PHOS	ITPR3	5, prime, UTR, variant
rs56031203	12	21427868	A	G	1	-0.0280024	0.0037355	553307	2	TBIL	SLCO1A2	intron, variant, downstream, gene, non, coding, transcript, exon, NMD
rs56376587	18	77160235	A	C	1	-0.036273	0.00368861	2129013	1	CREA	NFATC1	intron, variant, upstream, gene
rs6180	5	42719239	A	C	1	0.023528	0.00367225	1394248	1	IGF1	GHR	missense, variant, 3, prime, UTR, NMD, transcript, downstream, gene
rs61816761	1	152285861	G	A	1	-0.0266866	0.00368701	1497096	1	VITD	FLG, AS1	stop, gained, upstream, gene, variant, intron, non, coding, transcript
rs62020666	15	43026625	T	A	1	0.0242102	0.00367732	922540	1	IGF1	TTBK2, CDAN1, CTD, 2036P10.3	downstream, gene, variant, intron, upstream
rs62061175	17	7321067	T	C	1	0.0404518	0.00401529	187596	4	SHBG	NLGN2, SPEM1, RP11, 104H15.7	synonymous, variant, upstream, gene, downstream
rs62623385	17	7847837	A	T	1	0.0457546	0.00408062	714366	3	SHBG	CNTROB	intron, variant, missense, downstream, gene, NMD, transcript, upstream, non, coding, exon
rs6413504	19	11241915	A	G	1	-0.0291586	0.00404452	32042	3	LDL	LDLR, SPC24	intron, variant, non, coding, transcript, downstream, gene
rs6487138	12	20905250	T	C	1	-0.0486521	0.00380119	30689	1	TBIL	SLCO1C1	synonymous, variant, missense, 3, prime, UTR, NMD, transcript
rs6519133	22	39096602	T	C	1	0.0288286	0.0036699	676731	1	CRP	JOSD1	5, prime, UTR, variant, intron, non, coding, transcript, exon, upstream, gene
rs6588153	1	66092017	T	A	1	0.0855778	0.00396263	128475	1	CRP	LEPR	downstream, gene, variant, intron
rs6664608	1	154479670	T	C	1	-0.0381105	0.00379515	394205	1	CRP	TDRD10	intron, variant
rs6667814	1	109815746	A	G	1	0.0266725	0.00378596	1324255	3	LDL	CELSR2	intron, variant, non, coding, transcript
rs6676143	1	16528218	G	T	1	-0.0440713	0.00383156	104386	1	GGT	ARHGEF19, AS1	intron, variant, downstream, gene, non, coding, transcript
rs6694817	1	154401972	C	T	1	-0.0343212	0.0040341	471903	2	CRP	IL6R	intron, variant
rs6757461	2	175300997	G	A	1	-0.0319671	0.00366829	118858	1	HBA1C	GPR155	synonymous, variant, downstream, gene
rs6850131	4	88226480	A	C	1	0.0281707	0.00369614	736850	1	SHBG	HSD17B13, MIR5705	intron, variant, upstream, gene
rs685653	1	109759776	A	G	1	-0.0315491	0.00383079	1380225	2	LDL	SARS	intron, variant, non, coding, transcript, downstream, gene
rs693	2	21232195	A	G	1	0.0562046	0.00403766	237272	1	LDL	APOB	synonymous, variant
rs7041	4	72618334	C	A	1	0.106787	0.00381785	315854	1	VITD	GC	missense, variant, intron, non, coding, transcript, exon, 3, prime, UTR, NMD
rs71318991	22	25023492	G	A	1	0.0613753	0.00364726	750891	4	GGT	GGT1	missense, variant, 3, prime, UTR, NMD, transcript, non, coding, exon, upstream, gene
rs7138492	12	125324197	A	G	1	0.0274177	0.00370776	2544814	1	APOA	SCARB1	intron, variant, non, coding, transcript, 5, prime, UTR
rs71456318	11	64332862	C	A	1	-0.0369352	0.0044084	95885	1	URT	SLC22A11	intron, variant, upstream, gene, non, coding, transcript, exon, downstream
rs7174918	15	99251356	C	T	1	-0.0260295	0.00366858	657469	1	URT	IGF1R	intron, variant, non, coding, transcript
rs72636977	11	290891	T	C	1	-0.0280001	0.00375053	2465467	1	ALP	ATHL1, RP11, 326C3.2	upstream, gene, variant, synonymous, non, coding, transcript, exon, intron, NMD, downstream
rs72657825	4	77290561	G	A	1	-0.0366534	0.00379232	74221	1	CREA	CCDC158	intron, variant, upstream, gene
rs72658867	19	11231203	G	A	1	0.0517913	0.00369613	21330	2	LDL	LDLR	splice, donor, 5th, base, variant, intron, downstream, gene
rs72778328	10	18270341	A	G	1	-0.0340054	0.00386457	7083	2	AST	SLC39A12	missense, variant
rs737128	22	24988920	C	T	1	-0.0806553	0.00384328	716319	1	GGT	GGT1, FAM211B, SNRPD3	intron, variant, synonymous, NMD, transcript, upstream, gene, non, coding, exon
rs73809629	4	10529766	G	C	1	0.026823	0.00366325	1623849	7	URT	CLNK	intron, variant, downstream, gene
rs740059	12	4671490	G	A	1	0.0309131	0.00374674	2336945	1	PHOS	RAD51AP1, DYRK4	downstream, gene, variant, intron, NMD, transcript, upstream
rs7412	19	45412079	C	T	1	0.20791	0.00438966	229611	1	LDL	APOE	missense, variant, downstream, gene
rs75439392	22	44377221	G	T	1	-0.0303031	0.00382291	112727	1	ALT	SAMM50	intron, variant, non, coding, transcript
rs75487798	4	10445207	T	C	1	-0.0513477	0.00380695	1539290	3	URT	ZNF518B	missense, variant, downstream, gene
rs7574296	2	234638249	A	G	1	-0.421601	0.00419047	118632	1	TBIL	UGT1A6, UGT1A10, UGT1A9, UGT1A4, UGT1A5, UGT1A7, UGT1A8, UGT1A3	intron, variant, NMD, transcript, non, coding, exon, synonymous
rs7598901	2	73675844	T	C	1	0.0253596	0.00368003	455487	1	CREA	ALMS1	synonymous, variant, upstream, gene
rs7599598	2	97351840	A	G	1	0.0270581	0.00367459	1662508	1	CAL	FER1L5	non, coding, transcript, exon, variant
rs762360	21	37425955	T	C	1	0.0264828	0.00367018	139231	1	IGF1	SETD4, RIMKLBP1	intron, variant, downstream, gene, non, coding, transcript
rs77960347	18	47109955	A	G	1	-0.0534952	0.00373832	55142	1	APOA	LIPG	missense, variant, downstream, gene
rs7823698	8	41577121	C	G	1	0.0257412	0.00367997	1666157	2	HBA1C	ANK1	intron, variant
rs7912524	10	71098295	A	T	1	-0.0713341	0.00389537	600899	1	HBA1C	HK1	intron, variant, non, coding, transcript, exon
rs838144	19	49250239	T	C	1	0.063082	0.00376098	133598	1	ALP	FUT1, IZUMO1	downstream, gene, variant, upstream
rs853772	2	169814655	T	G	1	0.0538053	0.00400988	23886	1	HBA1C	ABCB11	splice, polypyrimidine, tract, variant, intron, NMD, transcript
rs870992	5	52193237	A	G	1	-0.0270209	0.00367137	1043338	1	GGT	ITGA1	intron, variant, upstream, gene
rs888789	5	74988369	A	G	1	-0.0286093	0.00370073	385860	1	LDL	POC5	intron, variant, non, coding, transcript, downstream, gene
rs906220	10	71060610	G	A	1	0.0351269	0.00400067	638584	2	HBA1C	HK1, RP11, 227H15.7	missense, variant, intron, upstream, gene, non, coding, transcript, downstream, exon
rs918144	11	116633825	C	T	1	0.031454	0.00387836	71261	3	TRIG	BUD13	synonymous, variant, upstream, gene
rs9400239	6	108977663	C	T	1	0.032922	0.0036682	25321	1	IGF1	FOXO3	intron, variant, 5, prime, UTR
rs942379	6	25849620	G	A	1	0.0555242	0.00377559	17349	1	URT	SLC17A3	downstream, gene, variant, synonymous
rs9845457	3	135914476	A	G	1	-0.0341668	0.00387138	12237	1	SHBG	MSL2	5, prime, UTR, variant, upstream, gene, intron
rs9899415	17	59164245	T	C	1	0.0259331	0.00366968	26057	2	CREA	BCAS3	intron, variant, non, coding, transcript
rs9927	20	25277244	A	G	1	0.0331945	0.00398482	54290	1	ALP	PYGB, ABHD12	3, prime, UTR, variant, downstream, gene, intron, NMD, transcript, non, coding, exon
rs9930761	16	57007192	T	C	1	-0.0565135	0.00375901	128001	2	APOA	CETP	intron, variant, non, coding, transcript
rs10935453	3	141747640	G	T	0.999999	0.0237957	0.00368195	156357	1	CREA	TFDP2	intron, variant, non, coding, transcript, upstream, gene, NMD
rs12708919	16	71986995	G	A	0.999999	-0.0231651	0.00368834	191482	1	LDL	PKD1L3	splice, region, variant, intron, non, coding, transcript, polypyrimidine, tract
rs17881850	17	7573057	G	A	0.999999	-0.0248236	0.00370613	439586	6	SHBG	TP53	intron, variant, non, coding, transcript, downstream, gene
rs1902023	4	69536084	A	C	0.999999	0.0240464	0.00389879	279640	1	GGT	UGT2B15	missense, variant
rs2076148	20	39788855	A	G	0.999999	-0.0245915	0.00367629	119665	1	APOB	PLCG1	intron, variant, upstream, gene, non, coding, transcript, downstream
rs222837	17	7132556	C	T	0.999999	-0.0285664	0.00381334	63122	1	ALP	DVL2, ACADVL	synonymous, variant, downstream, gene, upstream, non, coding, transcript, exon
rs2291075	12	21331625	C	T	0.999999	-0.0245993	0.00378958	457064	4	TBIL	SLCO1B1, RP11, 125O5.2	synonymous, variant, downstream, gene
rs2294689	6	24653273	G	C	0.999999	-0.0253786	0.00394214	30154	3	ALP	TDP2	missense, variant, downstream, gene, non, coding, transcript, exon
rs3213232	11	2154964	G	A	0.999999	0.0254108	0.00388379	2462240	3	IGF1	IGF2, INS, MIR483, AC132217.4	intron, variant, NMD, transcript, downstream, gene, upstream
rs33918808	9	107579632	C	G	0.999999	-0.0254064	0.00386629	171224	5	HDL	ABCA1	missense, variant
rs4853574	2	192160839	T	A	0.999999	-0.0224403	0.00366974	69258	1	GGT	MYO1B	splice, region, variant, synonymous, non, coding, transcript, exon
rs5093	11	116693354	G	A	0.999999	-0.0247988	0.00374396	130790	3	APOA	APOA4	intron, variant
rs62128766	19	48337812	C	T	0.999999	-0.0240737	0.00366881	88054	1	VITD	CRX, TPRX2P	intron, variant, non, coding, transcript
rs7250893	19	19625547	A	G	0.999999	0.0255049	0.00370776	252771	1	CHO	NDUFA13, TSSK6, CTC, 260F20.3, YJEFN3	upstream, gene, variant, synonymous, NMD, transcript
rs7759182	6	33679239	C	A	0.999999	0.0252863	0.00386775	90729	2	PHOS	UQCC2	intron, variant
rs8017377	14	24883887	G	A	0.999999	0.0240813	0.00367369	174316	1	SHBG	NYNRIN	missense, variant, non, coding, transcript, exon
rs9370867	6	16145325	A	G	0.999999	0.0228209	0.00367069	19834	1	LDL	MYLIP, U3, MIR4639	missense, variant, downstream, gene
rs9491699	6	127471533	C	T	0.999999	-0.0230717	0.00367012	31320	1	URA	RSPO3	intron, variant, non, coding, transcript
rs10948059	6	42928461	C	T	0.999998	-0.0228564	0.00367039	31338	1	APOA	PEX6, RPL24P4, GNMT	downstream, gene, variant, upstream
rs117329800	22	25151741	G	A	0.999998	-0.0239072	0.0036532	879140	6	GGT	PIWIL3	intron, variant, non, coding, transcript
rs2277458	14	39583481	G	A	0.999998	-0.0234363	0.00367784	883334	1	VITD	GEMIN2, SEC23A	upstream, gene, variant, 5, prime, UTR
rs35411407	12	4708908	T	C	0.999998	-0.0227747	0.0036749	2318236	1	PHOS	DYRK4, RP11, 234B24.5	synonymous, variant, downstream, gene, non, coding, transcript, exon
rs544034	16	88909376	C	T	0.999998	-0.0248984	0.0037786	1863946	1	HBA1C	GALNS	intron, variant, upstream, gene, non, coding, transcript, exon, NMD
rs7177338	15	91428636	A	G	0.999998	-0.0236623	0.00391665	616296	1	SBP	FURIN, FES	downstream, gene, variant, splice, region, polypyrimidine, tract, intron, upstream, NMD, transcript, missense, non, coding, exon
rs7607980	2	165551201	T	C	0.999998	-0.0238999	0.00369401	5235	1	HDL	COBLL1	missense, variant, non, coding, transcript, exon, upstream, gene
rs9604573	13	114542858	G	A	0.999998	-0.0226661	0.00366953	2229369	1	CHO	GAS6, AS1	intron, variant, upstream, gene, downstream
rs10778520	12	107364873	C	T	0.999997	-0.0235031	0.00366924	31474	1	PHOS	C12orf23	splice, polypyrimidine, tract, variant, intron, upstream, gene
rs10786156	10	96014622	C	G	0.999997	0.0227703	0.00367363	27535	1	SBP	PLCE1	intron, variant
rs2229616	18	58039276	C	T	0.999997	0.0221592	0.00366904	677732	1	BMI	MC4R	missense, variant
rs28418471	14	103576292	G	A	0.999997	-0.0236161	0.00367456	1123432	2	GGT	EXOC3L4	intron, variant, NMD, transcript, non, coding
rs4296139	13	95275576	G	C	0.999997	-0.0227455	0.00367804	879497	1	ALP	GPR180	intron, variant
rs9783783	16	30078492	C	G	0.999997	0.0238216	0.00374345	1545317	1	IGF1	ALDOA	intron, variant, downstream, gene, non, coding, transcript, upstream
rs1875763	1	161696998	G	C	0.999996	0.0270749	0.00418867	368642	2	TPROT	FCRLB	intron, variant, non, coding, transcript
rs9362415	6	87968565	A	G	0.999996	0.0216964	0.00367427	802586	1	IGF1	ZNF292	missense, variant, downstream, gene, intron
rs150952015	15	60884594	G	T	0.999995	0.0222468	0.00366924	21994	1	GGT	RORA, RP11, 219B17.1	intron, variant, missense, NMD, transcript, non, coding, exon
rs4148776	2	169870882	A	G	0.999995	0.0233007	0.00369977	218158	1	ALP	ABCB11	intron, variant
rs2070470	22	24583879	T	C	0.999994	0.0261178	0.00392673	401557	7	GGT	SUSD2	intron, variant, non, coding, transcript
rs62621812	7	127015083	G	A	0.999994	0.0217344	0.00366942	41750	1	ALP	ZNF800	missense, variant, downstream, gene, upstream
rs11125393	2	24276736	T	C	0.999993	0.0224773	0.0036757	137058	1	HBA1C	FKBP1B, C2orf44, MFSD2B	intron, variant, upstream, gene, NMD, transcript, non, coding
rs1136201	17	37879588	A	G	0.999993	-0.0248618	0.00372974	49768	1	CREA	ERBB2, MIR4728	missense, variant, 3, prime, UTR, NMD, transcript, non, coding, exon, upstream, gene, downstream
rs7724832	5	156381370	A	G	0.999993	0.0223986	0.00371988	165876	1	CHO	TIMD4	intron, variant
rs12975366	19	54759361	T	C	0.999991	0.022842	0.00366966	321307	1	AST	LILRB5	missense, variant, non, coding, transcript, exon
rs1318235	1	21944397	A	G	0.999991	0.0242076	0.00379316	121637	2	PHOS	RAP1GAP	intron, variant, non, coding, transcript, downstream, gene, NMD
rs145500346	17	80699238	A	G	0.999991	-0.0236464	0.00372949	2131523	3	HBA1C	FN3K, RP11, 388C12.8	missense, variant, non, coding, transcript, exon, upstream, gene, downstream
rs61905530	11	117077716	G	A	0.99999	-0.0261718	0.00450636	515152	4	APOA	TAGLN, PCSK7	downstream, gene, variant, intron, non, coding, transcript
rs3805497	5	40746885	A	T	0.999989	0.0214074	0.00367048	435922	1	URA	TTC33	intron, variant, non, coding, transcript
rs13421952	2	100721050	G	A	0.999988	-0.0223901	0.00367447	21342	1	TPROT	AFF3, AC092667.2	intron, variant, upstream, gene
rs34592828	5	75996909	G	A	0.999988	0.023214	0.00369565	120447	1	TPROT	IQGAP2, CTD, 2384B11.2	missense, variant, 3, prime, UTR, NMD, transcript, downstream, gene, intron, non, coding, upstream
rs117877390	19	19378416	C	T	0.999986	0.023156	0.00369629	74106	2	LDL	HAPLN4, TM6SF2, AC138430.4	upstream, gene, variant, intron, non, coding, transcript, downstream
rs17848019	3	172224771	A	T	0.999985	-0.021505	0.00367042	214475	1	IGF1	TNFSF10	intron, variant, downstream, gene
rs34801630	3	46007846	C	T	0.999984	-0.0215176	0.00367026	71241	1	AST	FYCO1	missense, variant
rs55727303	9	136131576	C	T	0.999984	-0.0234357	0.00372169	104905	3	ALP	ABO, RP11, 430N14.4	non, coding, transcript, exon, variant, upstream, gene
rs879620	16	4015729	T	C	0.999984	0.0210167	0.00367039	2496778	1	BMI	ADCY9	3, prime, UTR, variant, intron
rs1044498	6	132172368	A	C	0.999983	-0.0225826	0.00369664	134667	1	PHOS	ENPP1	missense, variant, non, coding, transcript, exon, NMD
rs35985803	17	7254315	G	A	0.999981	0.0240738	0.00384493	120844	8	SHBG	ACAP1, TMEM95, KCTD11, RP11, 542C16.1	missense, variant, upstream, gene, downstream
rs10009145	4	100047929	G	A	0.999979	0.0225991	0.00381646	225372	1	ALP	ADH4, RP11, 696N14.1	intron, variant, non, coding, transcript, downstream, gene, NMD
rs12263369	10	94823343	T	C	0.999979	-0.0217663	0.00367251	40542	1	TBIL	EXOC6, CYP26C1, RP11, 348J12.2	downstream, gene, variant, intron, upstream
rs6806529	3	123049938	C	A	0.999978	0.0224918	0.00368633	252744	1	HBA1C	ADCY5	intron, variant, downstream, gene
rs12638263	3	185795855	A	C	0.999976	0.0217501	0.00367122	208990	1	BMI	ETV5, AS1	intron, variant, downstream, gene, upstream, non, coding, transcript, exon
rs1042591	2	234526794	T	G	0.999975	-0.0215054	0.00342057	7177	10	TBIL	UGT1A8	synonymous, variant
rs4983387	14	105268228	A	G	0.999975	-0.0221868	0.0037202	2248118	1	APOA	ZBTB42	missense, variant
rs11696196	20	44574533	C	T	0.999974	-0.0228726	0.00374714	750591	2	HDL	ZNF335, PCIF1	downstream, gene, variant, intron, non, coding, transcript
rs2302507	3	37144535	C	A	0.999972	0.0212617	0.00367571	54641	1	GGT	LRRFIP2	intron, variant, non, coding, transcript
rs11855248	15	41276158	G	A	0.999969	-0.0219823	0.00367037	4359718	2	CREA	INO80	intron, variant, upstream, gene, NMD, transcript, non, coding, exon, downstream
rs2060824	2	61484556	C	T	0.999969	0.0203719	0.00367477	396999	1	CAL	USP34	intron, variant, upstream, gene, non, coding, transcript
rs28660993	12	123875394	T	C	0.999965	-0.0221511	0.00370524	1096011	2	APOA	SETD8	intron, variant, NMD, transcript, non, coding, exon, upstream, gene, downstream
rs9427094	1	154557685	C	T	0.999963	0.0233621	0.00376421	4223796	5	CRP	ADAR	splice, region, variant, intron, non, coding, transcript, downstream, gene
rs6416452	15	53994493	G	A	0.999962	-0.02087	0.00367137	58832	1	CREA	WDR72	synonymous, variant
rs1672867	16	57071114	G	A	0.999961	0.0222739	0.00369747	840019	4	HDL	NLRC5	missense, variant, NMD, transcript, upstream, gene, 3, prime, UTR
rs3787500	20	21336825	A	G	0.99996	-0.0216414	0.00367283	329336	1	IGF1	XRN2	intron, variant
rs55772354	4	74276150	G	A	0.999955	0.0207559	0.0036724	34405	1	ALB	ALB	intron, variant, downstream, gene, NMD, transcript, upstream, non, coding
rs35164803	23	14929375	G	A	0.999953	-0.0205513	0.00367216	79270	1	HDL	MOSPD2	missense, variant, non, coding, transcript, exon
rs6413830	1	176832552	G	A	0.999953	0.0232848	0.00383649	178535	1	IGF1	ASTN1	3, prime, UTR, variant, intron
rs7605661	2	43625078	T	C	0.999953	0.0212515	0.00367841	62026	1	DBP	THADA	intron, variant, NMD, transcript, non, coding
rs2714315	6	7229346	T	C	0.999951	0.0223498	0.00377515	145450	2	URT	RREB1	synonymous, variant
rs145188037	7	45954465	G	A	0.999947	-0.0217583	0.00368718	418925	2	IGF1	IGFBP3	missense, variant, downstream, gene, non, coding, transcript, exon
rs3738055	1	89426902	A	G	0.999945	-0.0212431	0.00367665	26836	1	GGT	CCBL2	synonymous, variant, 3, prime, UTR, non, coding, transcript, exon
rs5068	1	11905974	A	G	0.999943	0.0247318	0.00389086	42855	1	SBP	CLCN6, NPPA, AS1	downstream, gene, variant, 3, prime, UTR, intron, non, coding, transcript
rs1137101	1	66058513	A	G	0.999942	0.0234618	0.0039024	170787	2	CRP	LEPR	missense, variant, intron, non, coding, transcript, exon
rs151390	4	103183510	C	T	0.999941	0.0208924	0.00368347	241451	1	HDL	SLC39A8	3, prime, UTR, variant, intron
rs61733145	6	24437408	G	A	0.999937	-0.0219343	0.00378111	185711	5	ALP	GPLD1	synonymous, variant, upstream, gene
rs3828589	5	32713327	T	C	0.999935	0.0222881	0.00375595	1789291	1	SBP	NPR3	intron, variant, non, coding, transcript
rs1132899	19	45448036	C	T	0.999933	0.0224021	0.00371657	53364	3	HDL	APOC2, APOC4	upstream, gene, variant, missense, NMD, transcript
rs735295	12	547683	T	C	0.999933	-0.0214614	0.00368159	2496970	1	ALP	CCDC77	missense, variant, non, coding, transcript, exon
rs862999	1	159169641	C	T	0.999933	-0.0218638	0.00366639	4295766	3	CRP	DARC, CADM3, CTA, 134P22.2	upstream, gene, variant, synonymous, non, coding, transcript, exon, downstream
rs711309	7	77539744	A	G	0.999932	-0.0213446	0.00390854	904625	1	CREA	PHTF2	intron, variant, non, coding, transcript
rs67046345	12	20874996	C	A	0.999931	-0.0223461	0.0038515	435	5	TBIL	SLCO1C1	intron, variant, NMD, transcript
rs3816873	4	100504664	T	C	0.999928	0.0199852	0.00367364	495868	1	ALT	MTTP	missense, variant, downstream, gene
rs1292053	17	57963537	A	G	0.999921	-0.0205664	0.00367597	7023	1	TPROT	TUBD1, NDUFB8P2	missense, variant, intron, downstream, gene, NMD, transcript, non, coding, exon
rs3756772	6	116325142	C	T	0.999917	-0.0210345	0.00370759	821270	1	CHO	FRK	upstream, gene, variant, missense
rs3208856	19	45296806	C	T	0.999915	0.0234594	0.00382983	284166	4	APOB	CBLC	missense, variant
rs7332372	13	42465490	T	C	0.999912	0.0205539	0.00367617	23627	1	CAL	VWA8	intron, variant
rs17884869	12	123519112	G	A	0.999905	0.0208414	0.00368178	1189411	1	CAL	PITPNM2	missense, variant, non, coding, transcript, exon
rs7100474	10	60273121	T	C	0.9999	0.0211071	0.00367638	80237	1	URT	BICC1	intron, variant
rs3813687	6	24719978	G	A	0.999896	-0.0225448	0.00392965	15205	6	ALP	C6orf62	intron, variant, 5, prime, UTR
rs2511403	11	93754508	A	G	0.999892	0.0210523	0.00370344	1239724	1	ALT	HEPHL1	upstream, gene, variant
rs2116942	19	10334663	G	T	0.999886	-0.0222772	0.00373334	43176	1	IGF1	CTD, 2369P2.2, DNMT1, S1PR2	upstream, gene, variant, intron, synonymous
rs2291011	15	74000839	G	A	0.999871	-0.0211653	0.00368766	40288	1	GGT	CD276	intron, variant, non, coding, transcript, exon, NMD, upstream, gene
rs17400325	2	178565913	T	C	0.999868	-0.0199943	0.00367619	28859	1	IGF1	PDE11A, AC012499.1	missense, variant, non, coding, transcript, exon, intron
rs10755578	6	160969738	C	G	0.999851	0.0210729	0.00372224	553422	1	SHBG	LPA	intron, variant
rs142888784	19	38810744	C	G	0.999844	0.0216402	0.00377765	3066199	2	CAL	KCNK6, YIF1B	missense, variant, upstream, gene
rs6059856	20	33057954	G	C	0.999825	-0.0201909	0.00370254	689454	1	CREA	ITCH, MIR644A	intron, variant, downstream, gene, upstream, non, coding, transcript
rs3824627	10	113908060	C	T	0.999807	-0.0207481	0.00369083	416	2	HDL	GPAM	downstream, gene, variant
rs150959892	1	21944041	G	A	0.999793	0.0221094	0.00381313	313776	6	ALP	RAP1GAP	intron, variant, non, coding, transcript, downstream, gene, NMD
rs3809814	17	7225149	C	G	0.99976	-0.0240927	0.00391454	155715	2	ALP	RP11, 542C16.2, NEURL4	upstream, gene, variant, intron, downstream, non, coding, transcript, exon, NMD
rs4968213	17	7474277	T	C	0.99976	0.0222177	0.00382917	109417	7	SHBG	EIF4A1, SENP3, SNORA48, SNORA67	upstream, gene, variant, intron, non, coding, transcript, downstream
rs9282641	3	121796768	G	A	0.999734	0.020986	0.00372618	973434	2	CAL	CD86	intron, variant, 5, prime, UTR, non, coding, transcript, splice, donor, 5th, base, exon
rs5888	12	125284748	G	A	0.999727	-0.0214447	0.00384845	2505365	3	APOA	SCARB1	synonymous, variant, non, coding, transcript, exon
rs3816605	11	47857253	T	C	0.999679	-0.0199299	0.00369915	442400	1	SBP	NUP160	missense, variant, downstream, gene, 3, prime, UTR
rs1128919	2	148657117	G	A	0.999668	-0.0204976	0.00377814	31276	1	CREA	ACVR2A, AC009480.3	synonymous, variant, non, coding, transcript, exon, downstream, gene
rs146741374	4	9154990	T	C	0.999656	-0.0206632	0.00366398	1423427	8	URT	FAM86KP	upstream, gene, variant
rs34225933	5	176825069	C	T	0.999603	0.0199836	0.00369572	441186	1	PHOS	F12, SLC34A1, PFN3	downstream, gene, variant, missense, non, coding, transcript, exon
rs117334055	17	7290833	G	A	0.999593	-0.0222042	0.00391609	280714	11	SHBG	TNK1, TMEM256, PLSCR3, C17orf61	intron, variant, downstream, gene
rs114259939	6	26027141	G	A	0.999572	-0.0202927	0.00372536	160172	2	URT	HIST1H3B, HIST1H4A, HIST1H4B	downstream, gene, variant, 3, prime, UTR
rs1015149	6	41658889	C	T	0.99957	0.0206801	0.00369696	2101	1	CREA	TFEB, AL035588.1	synonymous, variant, upstream, gene, downstream
rs871841	17	8216468	T	C	0.999517	-0.0206611	0.00369778	114202	1	HBA1C	ARHGEF15, AC135178.7	missense, variant, non, coding, transcript, exon, downstream, gene, upstream, NMD
rs17546439	7	44100373	C	T	0.999481	-0.0205825	0.00374353	93563	1	HBA1C	PGAM2, DBNL, AC017116.11	downstream, gene, variant, splice, region, polypyrimidine, tract, intron, NMD, transcript, upstream, non, coding
rs360157	11	9754221	T	C	0.999457	0.0200343	0.00370061	25618	1	DBP	SWAP70	synonymous, variant, non, coding, transcript, exon, downstream, gene, 3, prime, UTR, NMD
rs114851469	1	22168855	G	A	0.999437	-0.0214383	0.00383208	538590	7	ALP	HSPG2	upstream, gene, variant, missense, downstream
rs4252185	6	161123451	T	C	0.99943	-0.0212863	0.00391731	399709	3	LDL	PLG, RP1, 81D8.3	intron, variant, non, coding, transcript, downstream, gene, upstream
rs9860801	3	136088038	G	A	0.999021	0.0199302	0.00377217	161325	2	TBIL	STAG1	synonymous, variant, 3, prime, UTR, NMD, transcript
rs3765236	6	25682262	A	C	0.998876	0.0199887	0.00383659	184707	1	HBA1C	SCGN, PRELID1P2	intron, variant, upstream, gene
rs526513	1	16731661	C	T	0.998528	0.0211865	0.0039504	28767	2	GGT	SPATA21	intron, variant, non, coding, transcript, upstream, gene
rs1127745	3	58512237	A	G	0.998477	0.0220284	0.00424005	37635	2	AST	ACOX2	synonymous, variant, non, coding, transcript, exon, downstream, gene, upstream, 3, prime, UTR, NMD
rs2072153	17	47390014	G	C	0.998396	-0.0212222	0.00394945	63794	3	SHBG	ZNF652	intron, variant, NMD, transcript
rs6414069	2	165578581	G	A	0.997753	-0.0194056	0.0038273	32615	2	TRIG	COBLL1	splice, donor, region, variant, intron, non, coding, transcript, downstream, gene, NMD, exon
rs395782	19	10426628	T	C	0.997706	-0.0222509	0.00403272	27981	2	IGF1	RAVER1, FDX1L, CTD, 2369P2.10, 2369P2.12	downstream, gene, variant, non, coding, transcript, exon, synonymous, NMD, upstream, intron
rs11867551	17	7630505	T	C	0.997702	-0.0220888	0.00409006	46811	9	SHBG	DNAH2	synonymous, variant
rs149686267	1	161600109	C	T	0.997667	-0.02096	0.00408259	226593	3	TPROT	FCGR3B, FCGR2B, FCGR3A	intron, variant, upstream, gene, non, coding, transcript, exon
rs41277319	22	24982254	G	A	0.99762	-0.0197549	0.00384356	109126	8	GGT	GGT1, FAM211B, SNRPD3	intron, variant, missense, downstream, gene, 3, prime, UTR, NMD, transcript, non, coding, exon
rs3733359	4	72649774	G	A	0.997516	-0.0212825	0.00444393	284414	3	VITD	GC	5, prime, UTR, variant, splice, region, polypyrimidine, tract, intron, NMD, transcript, upstream, gene
rs10919	1	156005431	G	C	0.997403	-0.019308	0.00379826	2222474	2	VITD	UBQLN4	3, prime, UTR, variant
rs10951758	7	44266077	A	G	0.997201	-0.0191691	0.00383631	259267	3	HBA1C	CAMK2B	intron, variant, NMD, transcript, upstream, gene, non, coding
rs872346	17	7721030	G	A	0.996835	0.0202816	0.00398366	137336	10	SHBG	DNAH2	splice, donor, region, variant, intron
rs3177036	22	44368204	A	G	0.996724	-0.0204009	0.00404249	103710	2	ALT	SAMM50	synonymous, variant, intron, upstream, gene, non, coding, transcript, exon
rs2268573	7	44190468	T	G	0.996706	-0.0195655	0.0039585	183658	2	HBA1C	GCK	upstream, gene, variant, intron, downstream
rs3806189	1	159750802	G	C	0.996471	0.0196056	0.00390072	143204	3	CRP	DUSP23	5, prime, UTR, variant, intron
rs74356516	2	234229480	C	T	0.996171	-0.0199087	0.00398429	334837	3	CAL	SAG	intron, variant, non, coding, transcript, downstream, gene, NMD
rs114303452	4	3449915	A	G	0.995963	-0.0189261	0.00386331	2496563	2	SHBG	HGFAC	missense, variant, non, coding, transcript, exon
rs2076308	6	50791640	G	C	0.99596	-0.0192674	0.00401136	18292	1	BMI	TFAP2B	intron, variant, downstream, gene
rs3812691	10	71078016	T	C	0.995457	-0.0197722	0.0040583	753318	5	HBA1C	HK1	intron, variant, upstream, gene, non, coding, transcript
rs10904887	10	17188641	C	T	0.995387	0.0187098	0.00387437	1074617	4	AST	TRDMT1	downstream, gene, variant, 3, prime, UTR, NMD, transcript
rs112442303	22	44385148	C	T	0.995256	-0.019112	0.00391582	120654	3	AST	SAMM50	intron, variant, upstream, gene, non, coding, transcript
rs3027003	1	159170797	C	T	0.994935	-0.0189105	0.00389405	4296922	5	CRP	DARC, CADM3, CTA, 134P22.2	upstream, gene, variant, 3, prime, UTR, non, coding, transcript, exon, downstream
rs534310	2	169719873	C	T	0.993334	-0.0189246	0.00404336	70896	2	HBA1C	NOSTRIN, SPC25	intron, variant, downstream, gene, non, coding, transcript
rs204472	19	45488434	G	A	0.993172	0.020546	0.00412167	305966	7	APOB	CLPTM1	intron, variant, upstream, gene, non, coding, transcript
rs61742747	16	1961866	G	A	0.99309	0.0186462	0.00398262	1637381	2	IGF1	HS3ST6	synonymous, variant
rs189510657	11	126262270	G	A	0.991847	0.018403	0.00402824	212884	3	ALP	ST3GAL4	intron, variant, non, coding, transcript, upstream, gene, NMD
rs74733149	1	66075586	A	G	0.991597	-0.0193231	0.004296	153714	4	CRP	LEPR	intron, variant, non, coding, transcript
rs8177971	1	155265446	C	A	0.991302	-0.0187836	0.00409435	60339	2	GGT	PKLR	intron, variant, NMD, transcript
rs691513	10	18254606	C	A	0.990793	-0.0198051	0.00433402	8652	3	AST	SLC39A12	synonymous, variant
rs3745710	19	49261267	C	T	0.990764	-0.0199579	0.00417972	52913	2	ALP	FGF21, FUT1	synonymous, variant, upstream, gene
rs2228568	8	119938782	T	C	0.990081	-0.0177689	0.00408566	770041	2	ALP	TNFRSF11B	synonymous, variant, 3, prime, UTR, NMD, transcript, non, coding, exon
rs1198423	1	23735241	T	G	0.989652	0.018762	0.00421597	32215	1	GGT	TCEA3, RP4, 654C18.1	intron, variant, non, coding, transcript, upstream, gene
rs2911442	16	88851310	A	C	0.989148	-0.018434	0.00419766	1805880	2	HBA1C	PIEZO1	splice, region, variant, synonymous
rs10917051	1	22141206	C	A	0.987988	-0.0187116	0.00425565	510941	8	ALP	LDLRAD2	missense, variant
rs4244812	11	65480768	A	G	0.987868	-0.0185918	0.00427213	80502	3	URT	RNASEH2C, KAT5	downstream, gene, variant, intron, non, coding, transcript, exon, upstream
rs140386498	1	150972959	A	T	0.987214	-0.0181259	0.00419212	3967000	2	SHBG	FAM63A, ANXA9	missense, variant, downstream, gene, intron, non, coding, transcript, upstream
rs191949663	2	234708393	A	C	0.98675	-0.0174056	0.00395024	170773	11	TBIL	MROH2A	intron, variant, non, coding, transcript
rs61743874	10	70696818	C	T	0.985643	0.0181007	0.00429057	1134516	6	HBA1C	DDX50	synonymous, variant, downstream, gene, non, coding, transcript, exon
rs12501859	4	73175048	G	A	0.984831	-0.0177029	0.0042886	240860	4	VITD	ADAMTS3	intron, variant, non, coding, transcript
rs998075	6	160468278	A	G	0.984597	0.0194208	0.00455307	1054882	2	LDL	IGF2R	synonymous, variant
rs749105	10	71144702	A	G	0.984159	0.019397	0.00473292	686632	7	HBA1C	HK1	intron, variant, non, coding, transcript
rs10798496	1	176992676	C	T	0.98301	-0.0176794	0.00436913	18411	2	IGF1	ASTN1	non, coding, transcript, exon, variant, synonymous, intron
rs118159005	17	80823413	C	T	0.982467	-0.0184435	0.00447546	2255698	4	HBA1C	TBCD	intron, variant, non, coding, transcript
rs2634679	12	48735304	T	G	0.982115	-0.0184231	0.00453165	176364	2	HBA1C	ZNF641	3, prime, UTR, variant, downstream, gene
rs7752408	6	161021873	G	C	0.981329	0.0178715	0.00453287	501287	3	APOB	LPA	intron, variant
rs5030909	10	70884013	G	A	0.981015	-0.0180008	0.00454388	815181	4	HBA1C	VPS26A	5, prime, UTR, variant, non, coding, transcript, exon, NMD
rs62231234	22	25023755	G	A	0.977961	0.0175879	0.00449489	38319	10	GGT	GGT1	intron, variant, NMD, transcript, non, coding, upstream, gene
rs4694697	4	70079838	T	C	0.976025	-0.0170665	0.00454084	2854350	2	VITD	UGT2B11, RP11, 704M14.1, 704M14.2	synonymous, variant, intron, non, coding, transcript, downstream, gene
rs746748	20	25282967	C	T	0.974995	-0.0168329	0.00457612	60013	2	ALP	PYGB, ABHD12	downstream, gene, variant, missense, upstream
rs6684154	1	150981225	C	A	0.974857	0.0175322	0.00460118	4344560	3	GGT	PRUNE, FAM63A	intron, variant, upstream, gene, non, coding, transcript
rs378697	6	132043349	T	A	0.974633	-0.0172451	0.00459409	263686	2	PHOS	ENPP3	intron, variant
rs61751862	19	49132867	G	C	0.974524	-0.0181244	0.00466872	16226	3	ALP	DBP, SPHK2	downstream, gene, variant, missense, 3, prime, UTR, NMD, transcript, intron
rs2271266	12	102506044	T	C	0.972747	-0.0174169	0.00473468	654334	2	IGF1	NUP37	intron, variant, non, coding, transcript
rs180794292	3	122254414	T	C	0.970528	0.0174961	0.00485406	515788	3	CAL	PARP9	intron, variant, 3, prime, UTR, non, coding, transcript
rs67884336	12	20852444	G	A	0.969095	0.0166291	0.00469979	22117	6	TBIL	SLCO1C1	intron, variant, non, coding, transcript, downstream, gene, NMD
rs56370926	10	61414176	G	A	0.964788	0.0170222	0.00498016	1060818	2	URT	SLC16A9	missense, variant
rs861212	1	21935433	G	T	0.963337	0.019311	0.00554346	305168	9	ALP	RAP1GAP	splice, region, variant, polypyrimidine, tract, intron, downstream, gene, NMD, transcript
rs72660360	1	21996031	G	A	0.959529	0.0175308	0.00519799	70003	3	PHOS	RAP1GAP	upstream, gene, variant
rs575353765	22	25019956	G	A	0.957919	-0.0167092	0.00502034	71424	9	GGT	GGT1	intron, variant, upstream, gene, downstream, NMD, transcript, non, coding
rs701104	12	125263204	C	A	0.956439	-0.0165749	0.00506997	93971	4	HDL	SCARB1	intron, variant, downstream, gene, non, coding, transcript
rs9593	12	109994870	T	A	0.955064	0.0162659	0.00503718	1809853	2	HDL	MMAB	missense, variant, downstream, gene, 3, prime, UTR, NMD, transcript
rs1042328	19	35557260	G	T	0.954146	-0.0176558	0.00539791	187285	2	ALB	HPN, AS1	3, prime, UTR, variant, intron, non, coding, transcript, exon
rs34284721	14	105267934	G	A	0.953392	-0.0161555	0.0050789	2247824	2	APOA	ZBTB42	missense, variant
rs1160984	19	45403924	C	T	0.952497	-0.0173017	0.00531799	9252	4	APOA	TOMM40	intron, variant, NMD, transcript
rs34059508	6	160575837	G	A	0.94678	-0.0159825	0.00525924	947323	5	LDL	SLC22A1	intron, variant, missense, 3, prime, UTR, NMD, transcript, upstream, gene
rs138436783	11	93862685	A	G	0.944793	-0.0155216	0.00518327	1347901	2	ALT	PANX1	intron, variant
rs62576440	9	112212207	T	C	0.943627	-0.0155503	0.00521007	4534034	4	CHO	PTPN3	intron, variant, 5, prime, UTR
rs1063178	1	161721707	C	T	0.941135	0.0182337	0.00607477	348191	4	TPROT	DUSP12	synonymous, variant, upstream, gene, 3, prime, UTR, NMD, transcript, intron, downstream
rs78626055	18	47566647	A	G	0.939273	0.0179675	0.00614635	124704	2	HDL	MYO5B	missense, variant, non, coding, transcript, exon
rs1761463	19	54823533	T	C	0.939059	-0.0170999	0.00570569	368723	1	HDL	LILRA5, AC008984.2	intron, variant, upstream, gene, non, coding, transcript
rs2304808	9	133510021	T	C	0.936674	0.01641	0.00553869	2734857	4	ALP	FUBP3	intron, variant, non, coding, transcript, exon, downstream, gene, upstream
rs61730618	20	46385955	C	T	0.936058	-0.0157514	0.00543424	2562013	3	HDL	SULF2	synonymous, variant, non, coding, transcript, exon
rs11011850	10	18270208	G	A	0.930356	-0.0164556	0.00585621	6950	5	AST	SLC39A12	intron, variant
rs10896644	11	57563991	C	T	0.92807	-0.0159381	0.00568654	4649419	2	GGT	CTNND1, TMX2, RP11, 691N7.6	synonymous, variant, intron, downstream, gene
rs74499562	16	51171126	T	C	0.925297	0.0152811	0.00562765	104598	2	CRP	SALL1	missense, variant, 3, prime, UTR, downstream, gene
rs552393576	6	50791592	A	G	0.919386	0.015415	0.00580643	18340	2	BMI	TFAP2B	intron, variant, downstream, gene
rs741780	19	45404431	T	C	0.918024	-0.0165834	0.00615453	5407	4	CRP	APOE, TOMM40	upstream, gene, variant, intron, NMD, transcript
rs11647611	16	88678038	G	C	0.91594	-0.0155978	0.0059133	1632608	3	HBA1C	ZC3H18	intron, variant, non, coding, transcript, downstream, gene
rs35371121	2	234255145	A	C	0.905264	-0.0158039	0.00616882	309172	12	TBIL	SAG, RP11, 400N9.1	intron, variant, non, coding, transcript, downstream, gene
rs9390	17	80899281	G	A	0.902264	-0.015486	0.00621834	2331566	5	HBA1C	B3GNTL1, TBCD	downstream, gene, variant, synonymous, non, coding, transcript, exon
rs17758315	9	136379890	G	A	0.900784	0.0157178	0.00629707	135012	5	ALP	TMEM8C	synonymous, variant, downstream, gene
rs12714102	2	21246306	G	C	0.89261	0.0150445	0.00638266	223161	3	CHO	APOB	intron, variant, downstream, gene
rs2277598	15	73027478	C	T	0.89173	0.0144724	0.00612012	933073	2	GGT	BBS4	missense, variant, downstream, gene, 3, prime, UTR, NMD, transcript, non, coding, exon, upstream
rs45448095	1	55505447	C	T	0.880379	0.0148262	0.0065457	33390	3	LDL	PCSK9	5, prime, UTR, variant, upstream, gene
rs7975237	12	108985945	A	G	0.878903	0.0141666	0.00628349	1589598	3	PHOS	TMEM119	missense, variant, downstream, gene
rs34139736	2	28065875	C	G	0.877628	-0.0147758	0.00666074	2094324	2	IGF1	RBKS, MRPL33	intron, variant, NMD, transcript
rs57285449	11	299411	C	G	0.877207	0.0144956	0.00643265	2456947	3	ALP	IFITM5, ATHL1, RP11, 326C3.4	missense, variant, downstream, gene
rs2234971	10	101166544	C	T	0.873319	0.0142868	0.00643625	772371	2	AST	GOT1	synonymous, variant, upstream, gene
rs5742620	12	102869600	G	T	0.871383	0.014386	0.00655483	290778	3	IGF1	IGF1	intron, variant
rs72836608	17	38251657	C	A	0.869803	-0.0142934	0.00650997	3927310	2	HDL	NR1D1, THRA	intron, variant, downstream, gene
rs61744681	22	25264353	C	T	0.866493	-0.0140989	0.00648552	172973	12	GGT	SGSM1	synonymous, variant, non, coding, transcript, exon
rs2296744	6	33740382	A	G	0.857505	0.0143228	0.00678167	122433	3	PHOS	LEMD2	3, prime, UTR, variant, NMD, transcript, downstream, gene, non, coding, exon
rs525767	17	37070737	G	A	0.853642	-0.0137842	0.00664507	759083	2	CREA	LASP1, RP1, 56K13.3	intron, variant, NMD, transcript, downstream, gene, non, coding
rs1800774	16	57015545	C	T	0.850111	0.0149602	0.00727065	784450	6	HDL	CETP	splice, polypyrimidine, tract, variant, intron
rs34685616	2	101638828	C	T	0.848694	0.0133082	0.00655888	896436	2	TPROT	TBC1D8, RPL31	synonymous, variant, downstream, gene, intron, non, coding, transcript, exon
rs75568319	2	24398818	G	A	0.846298	-0.0131483	0.00653641	2929351	3	APOB	FAM228A, AC008073.7, RP11, 507M3.1	intron, variant, upstream, gene, NMD, transcript
rs73057542	19	49216607	G	A	0.846061	0.0144764	0.00704719	99966	4	ALP	MAMSTR	missense, variant, downstream, gene
rs4148214	2	44079004	C	T	0.841136	-0.0149636	0.00749021	33114	2	LDL	ABCG8	intron, variant
rs3741782	12	109095137	A	G	0.837436	0.0132589	0.00674017	2709586	3	HDL	CORO1C	intron, variant, upstream, gene, non, coding, transcript, NMD
rs149363012	12	670520	C	T	0.83456	-0.0130794	0.00672013	2374133	2	ALP	B4GALNT3, NINJ2	missense, variant, downstream, gene, non, coding, transcript, exon
rs41469449	18	47108656	T	G	0.829971	0.0142938	0.00748221	333287	4	APOA	LIPG	intron, variant, downstream, gene
rs3745677	19	11211077	G	A	0.819205	-0.0140691	0.0074369	56893	4	LDL	LDLR	intron, variant, non, coding, transcript, upstream, gene, exon
rs4073237	2	44049872	C	T	0.799615	0.013401	0.0075445	3982	3	LDL	ABCG5	intron, variant, NMD, transcript
rs1062677	4	72433545	A	C	0.795234	-0.0126976	0.00727582	500643	5	VITD	SLC4A4	3, prime, UTR, variant, missense
rs12135802	1	65992140	A	G	0.790568	0.0124282	0.00720211	228352	5	CRP	LEPR	intron, variant, non, coding, transcript
rs2304479	16	56901065	A	G	0.790354	-0.0127495	0.0073431	669970	8	HDL	SLC12A3	synonymous, variant
rs2124147	3	171395468	A	G	0.785892	0.0118439	0.00698626	141279	2	HBA1C	PLD1	synonymous, variant, missense, upstream, gene, non, coding, transcript, exon
rs41311274	1	27248273	C	A	0.780447	0.0123118	0.00729559	38016	2	IGF1	NUDC	5, prime, UTR, variant, intron, upstream, gene
rs36049418	16	56921840	G	A	0.777325	-0.0128368	0.00765304	690745	7	HDL	SLC12A3	missense, variant
rs143547587	10	71025440	C	T	0.771839	-0.0122716	0.00743524	673754	8	HBA1C	HKDC1, HK1, RP11, 227H15.5	synonymous, variant, upstream, gene, downstream, non, coding, transcript, exon
rs1079109	1	161495040	C	T	0.763048	-0.013099	0.00807738	121524	5	TPROT	HSPA6, FCGR2A, RP11, 25K21.6	missense, variant, downstream, gene, intron, non, coding, transcript
rs17745893	2	25642294	T	C	0.759515	-0.0114309	0.00718369	4172827	2	APOA	DTNB, AC104699.1	intron, variant, upstream, gene, NMD, transcript, non, coding, exon
rs500389	11	117100594	A	G	0.752544	-0.0128589	0.00818421	294265	6	APOA	RNF214, PCSK7	upstream, gene, variant, intron, 5, prime, UTR
rs2274305	6	24291203	C	T	0.751507	0.0116483	0.00745971	331916	7	ALP	DCDC2	missense, variant
rs1557359	18	47480898	T	C	0.750219	-0.0124752	0.00794988	38955	2	APOA	MYO5B	intron, variant
rs10493176	1	55538552	T	G	0.740413	0.0119689	0.00780697	285	2	LDL	USP24	intron, variant, non, coding, transcript, exon
rs117132825	20	44588904	G	A	0.736141	-0.0114289	0.00753768	764962	4	HDL	ZNF335	missense, variant, downstream, gene
rs2296339	6	33630624	T	C	0.731571	0.0116503	0.00775632	42114	4	PHOS	ITPR3	intron, variant
rs11264302	1	155028522	A	G	0.72809	0.0116141	0.00776585	297263	2	URT	ADAM15	intron, variant, upstream, gene, non, coding, transcript, exon, downstream, NMD
rs114932341	2	169783567	G	T	0.72343	-0.0112625	0.0076596	7202	3	HBA1C	ABCB11	intron, variant, NMD, transcript
rs61887762	11	68029074	G	A	0.72292	-0.0111631	0.00758059	3132558	2	VITD	C11orf24	3, prime, UTR, variant, downstream, gene, non, coding, transcript, exon
rs142246501	1	21616932	G	T	0.721021	-0.0128476	0.00878588	393764	5	PHOS	ECE1, RP5, 1071N3.1	upstream, gene, variant, 5, prime, UTR, intron, non, coding, transcript, exon
rs7716614	5	156456862	G	T	0.720068	0.0106301	0.00732601	90384	2	CHO	HAVCR1	splice, polypyrimidine, tract, variant, intron, non, coding, transcript
rs483462	1	55525400	A	G	0.719781	0.0117351	0.00803533	13437	4	LDL	PCSK9	intron, variant, non, coding, transcript
rs17490057	1	67109277	G	C	0.707512	-0.0115649	0.00825286	888785	3	CRP	SGIP1	missense, variant, non, coding, transcript, exon
rs73214155	12	121454342	T	A	0.699812	0.0112396	0.00802399	437495	3	CRP	OASL, C12orf43	downstream, gene, variant, upstream
rs2075995	1	23847464	A	C	0.691951	0.0108749	0.00788184	144438	2	GGT	E2F2	missense, variant, upstream, gene
rs34436026	1	161519440	C	T	0.687795	-0.010944	0.00800612	145924	6	TPROT	FCGR3A, RP11, 25K21.6	intron, variant, non, coding, transcript
rs28362580	1	110162918	T	C	0.686184	-0.0105634	0.00777455	977083	6	APOB	AMPD2	upstream, gene, variant, intron, non, coding, transcript
rs6431631	2	234688036	A	C	0.682964	0.0117782	0.00863465	150416	13	TBIL	MROH2A	missense, variant, intron, upstream, gene
rs28399637	19	45324138	G	A	0.677102	0.0111471	0.00829926	678	5	CRP	BCAM	intron, variant, downstream, gene, non, coding, transcript
rs118031086	11	63520131	G	A	0.672323	0.0106453	0.0080428	1880135	5	URT	RTN3	intron, variant, NMD, transcript, downstream, gene
rs1803690	22	24300102	A	G	0.664019	-0.0102273	0.00786291	791278	13	GGT	GSTT2B, AP000350.8	synonymous, variant, downstream, gene
rs114103746	1	151803705	C	T	0.646229	-0.0099193	0.00790991	3136254	3	SHBG	RORC	intron, variant
rs2193831	2	169826877	T	C	0.64218	0.00959275	0.00774253	262163	3	ALP	ABCB11	intron, variant, splice, polypyrimidine, tract, NMD, transcript, non, coding, exon
rs11962520	6	43188600	C	T	0.637191	-0.00976518	0.00792935	1531812	2	CREA	DNPH1, CUL9, RP3, 330M21.5	downstream, gene, variant, missense, intron, non, coding, transcript, upstream, 3, prime, UTR, NMD, exon
rs41306249	23	109697443	T	C	0.635765	-0.00891742	0.00737631	1098631	2	SHBG	RGAG1	missense, variant, downstream, gene
rs79762317	1	109808329	G	A	0.632179	-0.0101903	0.00838516	1331672	4	APOB	CELSR2	intron, variant, non, coding, transcript, upstream, gene
rs3026133	17	5308603	G	A	0.626357	0.00979919	0.00809598	2548124	13	SHBG	NUP88	intron, variant, downstream, gene, non, coding, transcript
rs34082659	2	234676409	C	T	0.623738	-0.00946415	0.00783548	112092	14	TBIL	UGT1A6, UGT1A1, UGT1A10, UGT1A9, UGT1A8, UGT1A4, UGT1A5, UGT1A7, UGT1A3	intron, variant, NMD, transcript, downstream, gene
rs78620114	17	42930859	G	A	0.616942	-0.0094128	0.00796617	751892	2	TRIG	HIGD1B, EFTUD2	downstream, gene, variant, intron, non, coding, transcript, NMD
rs6575900	14	102675350	G	C	0.605805	-0.00892279	0.00774334	222490	3	GGT	WDR20	3, prime, UTR, variant, intron, synonymous, NMD, transcript, downstream, gene
rs9851180	3	122259606	C	T	0.596403	-0.00953553	0.00840356	510596	5	CAL	PARP9	missense, variant, non, coding, transcript, exon
rs2255901	10	101639796	A	G	0.587692	-0.00894766	0.00802076	60761	2	ALT	DNMBP	synonymous, variant
rs373415120	1	21995686	G	A	0.560755	0.00869781	0.00819923	15010	7	PHOS	RAP1GAP	intron, variant, non, coding, transcript, upstream, gene, NMD
rs10935479	3	142773738	T	C	0.558683	-0.00797145	0.00759884	869741	2	URT	U2SURP	intron, variant, NMD, transcript, downstream, gene
rs9853873	3	58484521	T	C	0.545631	0.00801689	0.00782457	9919	3	AST	KCTD6	intron, variant, downstream, gene, non, coding, transcript
rs37024	16	56966071	G	T	0.533978	0.00892418	0.00891937	734976	5	HDL	HERPUD1	5, prime, UTR, variant, upstream, gene, non, coding, transcript, exon, NMD
rs7522863	1	39385086	C	A	0.531702	0.00786615	0.00785558	671341	2	SHBG	RHBDL2, RP5, 864K19.4	intron, variant, downstream, gene
rs3738984	2	44531484	T	C	0.528014	0.00754439	0.00761527	844380	2	DBP	SLC3A1	splice, region, variant, intron, downstream, gene
rs41270037	1	161160833	C	T	0.524696	-0.00784258	0.00792433	212683	7	TPROT	ADAMTS4	downstream, gene, variant, 3, prime, UTR
rs17014495	1	109714403	C	A	0.522042	0.00854363	0.00870372	1425598	5	APOB	KIAA1324	intron, variant, non, coding, transcript, NMD
rs2476194	1	62594593	T	C	0.514504	-0.00736122	0.00761558	3625899	6	CRP	INADL	synonymous, variant, downstream, gene, 3, prime, UTR, NMD, transcript
rs8208	15	40328665	A	G	0.50715	0.00730679	0.00766136	1131921	3	CREA	EIF2AK4, SRP14, AS1	downstream, gene, variant, synonymous, upstream, non, coding, transcript, exon
rs17023081	4	96051304	G	A	0.49887	0.00691453	0.00739872	3831981	2	CHO	BMPR1B	intron, variant
rs117865497	16	2140843	G	T	0.494772	0.00734669	0.00786608	1458835	3	IGF1	TSC2, PKD1, MIR1225, RP11, 304L19.1, 304L19.3	downstream, gene, variant, intron, upstream, non, coding, transcript
rs1171660	10	61443808	A	G	0.49341	-0.00704963	0.00761694	1090450	3	URT	SLC16A9	intron, variant, downstream, gene
rs11247320	15	102251993	A	G	0.484162	0.00675213	0.00742238	3658106	2	URT	TARSL2	intron, variant, NMD, transcript, upstream, gene, downstream
rs12829682	12	49319036	C	A	0.477489	0.00698484	0.00773418	760096	3	HBA1C	FKBP11, CCDC65, Y, RNA, RP11, 302B13.5, AC073610.5	intron, variant, NMD, transcript, downstream, gene, upstream, non, coding, exon
rs2302593	19	46196634	C	G	0.475918	0.00740391	0.00817705	2999414	2	URA	QPCTL, SNRPD2	intron, variant, upstream, gene, NMD, transcript
rs5030915	10	71144256	A	G	0.467875	0.00696384	0.00787556	554938	9	HBA1C	HK1	intron, variant, non, coding, transcript, exon
rs573455	11	117267884	G	A	0.438605	-0.00629403	0.00752749	461555	7	HDL	CEP164	missense, variant, non, coding, transcript, exon
rs3741367	11	66083129	T	C	0.437187	-0.00638197	0.00763769	4448674	2	HDL	CD248, RP11, 867G23.13	missense, variant, intron, non, coding, transcript
rs17403977	11	10585387	G	C	0.422677	-0.00634395	0.0077883	4893678	2	ALP	LYVE1, MRVI1, AS1	intron, variant, NMD, transcript, non, coding
rs1368464	19	50140068	T	C	0.422345	0.00661423	0.00810402	38532	3	TPROT	RRAS	intron, variant, non, coding, transcript
rs1064040	7	77569559	C	T	0.42168	0.00570248	0.00710432	874810	2	CREA	PHTF2	synonymous, variant, downstream, gene, non, coding, transcript, exon
rs111558392	20	20348962	C	T	0.406617	-0.00572283	0.00730478	658527	2	IGF1	INSM1	synonymous, variant
rs11670522	19	46885977	C	T	0.39994	0.0059836	0.00768378	1562517	6	CRP	PPP5C, AC007193.9	intron, variant, upstream, gene, NMD, transcript, non, coding, exon
rs2232801	19	44676148	C	G	0.398225	0.00596612	0.00768798	615510	7	CRP	ZNF226	intron, variant, non, coding, transcript
rs1872072	8	79601420	C	T	0.386405	-0.00511582	0.00683796	3148393	2	URT	ZC2HC1A, IL7	intron, variant, non, coding, transcript
rs80321803	19	36339810	T	C	0.369876	-0.00528224	0.00724732	595265	2	SHBG	NPHS1	intron, variant, upstream, gene, downstream, non, coding, transcript
rs12445258	16	2087658	A	G	0.361428	-0.00521065	0.00727673	1512020	4	IGF1	NTHL1, SLC9A3R2	downstream, gene, variant, intron, non, coding, transcript
rs4423040	1	109265029	T	G	0.360671	-0.00514856	0.00721592	1874972	8	APOB	FNDC7	missense, variant, upstream, gene
rs11562980	2	234740275	T	C	0.359989	-0.00505369	0.00703243	175958	15	TBIL	MROH2A, HJURP	intron, variant, downstream, gene, non, coding, transcript
rs2071383	15	91430436	C	T	0.358399	0.0050754	0.00714999	618096	2	SBP	FURIN, FES	downstream, gene, variant, synonymous, upstream, NMD, transcript, 3, prime, UTR, non, coding, exon
rs2303391	2	148680762	A	G	0.357197	0.00466816	0.0066408	54921	2	CREA	ACVR2A	intron, variant, upstream, gene
rs2071313	11	64572602	G	A	0.354218	-0.00540553	0.0076599	46885	7	URT	MAP4K2, MEN1	upstream, gene, variant, synonymous, intron, downstream, non, coding, transcript, exon
rs4760	19	44153100	A	G	0.349079	0.00516972	0.00738414	1241572	4	HDL	PLAUR	missense, variant, intron, downstream, gene
rs10485596	20	20208850	C	T	0.336991	0.00465026	0.00686835	798639	3	IGF1	C20orf26	intron, variant, NMD, transcript, non, coding, downstream, gene
rs117135286	12	123849212	G	A	0.326321	-0.00453563	0.00685052	1507963	5	HDL	hsa, mir, 8072, SBNO1	upstream, gene, variant, intron, non, coding, transcript, exon
rs60335331	17	41907509	A	G	0.323436	-0.00458818	0.00696551	271458	3	TRIG	MPP3	intron, variant, non, coding, transcript, NMD
rs118081933	17	7606211	G	A	0.31909	-0.00479604	0.00731646	250516	14	SHBG	EFNB3, WRAP53	upstream, gene, variant, intron, NMD, transcript, non, coding, exon
rs521950	11	64127744	A	G	0.313941	0.00459832	0.00712062	109233	6	URT	RPS6KA4, CCDC88B	synonymous, variant, downstream, gene, 3, prime, UTR, NMD, transcript, non, coding, exon, upstream
rs628031	6	160560845	G	A	0.312802	-0.0049005	0.00764401	962315	6	CHO	SLC22A1	missense, variant, intron, NMD, transcript, 3, prime, UTR
rs13141	12	121756084	G	A	0.311833	-0.00435452	0.00678735	475368	2	ALP	ANAPC5	missense, variant, downstream, gene, non, coding, transcript, exon, 3, prime, UTR, NMD
rs114010802	2	20974586	C	T	0.309634	0.00409284	0.00644547	494881	5	APOA	C2orf43	missense, variant, downstream, gene
rs2036772	12	102517753	T	C	0.303117	-0.00425059	0.00677667	642625	4	IGF1	PARPBP, NUP37	5, prime, UTR, variant, synonymous, NMD, transcript, non, coding, exon, upstream, gene
rs3740357	10	63808960	T	C	0.29398	-0.00384787	0.00628629	1161487	2	TRIG	ARID5B	intron, variant, upstream, gene
rs3745859	19	39196745	C	T	0.293478	-0.00415938	0.00676443	3452200	3	CAL	ACTN4	synonymous, variant, intron, upstream, gene, non, coding, transcript, exon
rs1139978	1	42657196	T	G	0.289329	-0.00399163	0.00656072	2600769	2	APOA	FOXJ3	missense, variant, upstream, gene, downstream
rs6846414	4	10586530	T	C	0.287188	0.00399184	0.00658718	60240	10	URT	CLNK	intron, variant
rs11161539	1	85648905	C	T	0.287147	0.0038472	0.00637324	3804833	2	GGT	SYDE2	intron, variant, non, coding, transcript
rs10889644	1	67145322	A	C	0.282562	0.00406788	0.00679994	924830	7	CRP	SGIP1, AL139147.1	intron, variant, downstream, gene, non, coding, transcript, upstream
rs299075	5	68728544	G	A	0.281441	0.00373422	0.00627609	3700389	2	AST	MARVELD2	intron, variant
rs76381440	1	156146546	C	T	0.280043	-0.00397713	0.00667003	820761	4	GGT	SEMA4A	missense, variant, downstream, gene
rs75841596	19	14164629	C	T	0.278267	-0.00405671	0.00681372	3765982	3	IGF1	IL27RA, PALM3	downstream, gene, variant, missense
rs1977198	6	26466225	C	A	0.277387	-0.00374392	0.00636407	599256	4	HBA1C	BTN2A1	intron, variant, NMD, transcript, downstream, gene
rs140157080	19	45567648	C	G	0.269341	0.00392711	0.00672452	555008	8	APOB	CLASRP	missense, variant, NMD, transcript, upstream, gene, downstream
rs2357928	10	18549641	A	G	0.265816	0.00358983	0.00626074	286383	6	AST	CACNB2, RP11, 109I13.2	intron, variant, upstream, gene, non, coding, transcript, exon
rs144623810	14	24884667	A	G	0.265024	0.00369253	0.00643594	175096	2	ALP	NYNRIN	missense, variant, downstream, gene
rs1529505	5	76114963	T	C	0.262403	-0.00353039	0.0062227	3686030	3	ALB	F2RL1	5, prime, UTR, variant, intron
rs112964088	12	116422269	T	A	0.260896	-0.00347482	0.00614129	4617546	3	TBIL	MED13L	intron, variant, upstream, gene
rs8192725	19	41354712	G	A	0.255695	-0.00374458	0.00667602	10075	5	ALP	CYP2A6, CTC, 490E21.12	intron, variant, non, coding, transcript, upstream, gene, NMD
rs2072770	22	45826880	G	A	0.254959	0.00351519	0.00628786	1562386	4	AST	RIBC2, RP1, 102D24.5	missense, variant, downstream, gene, non, coding, transcript, exon
rs143394331	5	73109488	G	A	0.253975	0.0033349	0.00600736	680555	3	AST	ARHGEF28	intron, variant, synonymous
rs1150781	6	34214322	G	C	0.253922	0.00356328	0.00638616	625812	5	PHOS	HMGA1, C6orf1	downstream, gene, variant, missense, non, coding, transcript, exon
rs72808950	2	27280140	C	A	0.250945	0.00339075	0.006143	1308589	5	IGF1	AGBL5, IT1, RP11, 503P10.1	intron, variant, upstream, gene, downstream, NMD, transcript
rs181699988	20	21186106	G	A	0.250715	-0.00310044	0.00566573	4036848	3	ALP	PLK1S1, RP4, 777D9.2	intron, variant, non, coding, transcript
rs144606996	4	9452317	T	C	0.24902	-0.0034203	0.00621188	1126100	9	URT	DEFB131	downstream, gene, variant
rs67257607	6	44149113	A	G	0.246998	-0.00344633	0.00628985	2492325	3	CREA	CAPN11	intron, variant, downstream, gene, non, coding, transcript
rs2070005	14	95058642	A	T	0.244909	0.00333302	0.0061274	270215	3	ALB	SERPINA5, RP11, 986E7.7	3, prime, UTR, variant, downstream, gene, intron, NMD, transcript
rs2608953	6	131926334	C	T	0.241325	0.00312819	0.00583239	4423481	2	URA	MED23	intron, variant
rs4597	22	24964128	C	T	0.238417	-0.00379915	0.00714302	127252	11	GGT	SNRPD3	synonymous, variant, NMD, transcript, intron
rs6955671	7	74489486	T	C	0.237345	0.00294797	0.0055786	3954883	3	CREA	WBSCR16	missense, variant, intron, non, coding, transcript, exon
rs28381983	2	27804432	T	C	0.237045	0.00347653	0.00654914	1832881	3	IGF1	ZNF512, AC074091.1, C2orf16, RP11, 158I13.2	upstream, gene, variant, downstream, missense
rs3895736	3	48658467	C	A	0.236818	-0.00310589	0.00585647	1090382	2	HBA1C	SLC26A6, TMEM89	downstream, gene, variant, splice, region, polypyrimidine, tract, intron
rs11554772	19	50434021	C	T	0.235832	-0.00343987	0.00644611	3933198	2	ALP	IL4I1, NUP62, ATF5, CTC, 326K19.6, MIR4751	upstream, gene, variant, 5, prime, UTR, intron, NMD, transcript
rs41270072	6	35442997	C	T	0.235398	0.00329179	0.00619922	1580182	6	PHOS	RPL10A, TEAD3	downstream, gene, variant, intron
rs173135	17	68172326	C	T	0.234431	-0.00311624	0.00590469	4353104	3	IGF1	KCNJ2	synonymous, variant
rs613855	1	55517861	C	G	0.232491	-0.00339345	0.00644951	20976	4	CHO	PCSK9	intron, variant, non, coding, transcript, exon
rs79794939	1	154390932	C	T	0.228847	-0.00327705	0.00629048	482943	6	CRP	IL6R, RP11, 350G8.7	intron, variant, upstream, gene
rs2271096	10	70959027	A	C	0.223318	-0.00304085	0.00594287	740167	10	HBA1C	SUPV3L1	intron, variant, downstream, gene
rs117091920	17	7689576	C	T	0.221437	-0.0033322	0.00650625	105882	15	SHBG	DNAH2	synonymous, variant, 3, prime, UTR, NMD, transcript
rs2272471	3	183995854	G	A	0.219059	0.00293612	0.00580541	2008991	2	BMI	ECE2, EIF2B5	intron, variant, NMD, transcript, upstream, gene, downstream, non, coding
rs114202167	1	109729936	C	T	0.216935	-0.00305833	0.00607679	1410065	7	APOB	KIAA1324	upstream, gene, variant, non, coding, transcript, exon, intron, NMD
rs116033409	2	24005931	A	C	0.216728	-0.00274924	0.00549852	2536464	2	TRIG	ATAD2B	intron, variant, non, coding, transcript, downstream, gene
rs41265445	3	137717744	G	A	0.215535	-0.00277453	0.00556171	1791031	3	SHBG	CLDN18	missense, variant
rs4387990	3	58516383	G	A	0.210973	-0.00294417	0.00598329	41781	4	AST	ACOX2	intron, variant, upstream, gene, downstream, NMD, transcript
rs58554303	6	28499567	T	C	0.209183	-0.00268476	0.0054879	2632598	3	URT	GPX5, GPX6	missense, variant, non, coding, transcript, exon, intron, upstream, gene
rs6531985	4	88293887	G	A	0.206277	-0.00266861	0.00550365	804257	2	ALT	HSD17B11	synonymous, variant, non, coding, transcript, exon, downstream, gene
rs2236318	10	69648569	A	T	0.204089	-0.002568	0.00533432	4678122	2	ALP	SIRT1	intron, variant, upstream, gene, non, coding, transcript
rs73191162	12	109660598	C	T	0.201283	-0.00263001	0.00549296	2144125	2	TBIL	ACACB	splice, region, variant, polypyrimidine, tract, intron
rs2234075	6	36343721	G	A	0.199411	0.00269173	0.00563669	2755211	6	PHOS	ETV7	synonymous, variant, intron
rs72796715	2	44050979	T	A	0.198202	-0.0025962	0.0054802	5089	4	CHO	ABCG5	intron, variant, NMD, transcript
rs116269521	4	6114677	G	A	0.19697	0.00259279	0.0054825	141828	2	SHBG	JAKMIP1	5, prime, UTR, variant, intron, non, coding, transcript, NMD
rs145368576	1	159772291	G	A	0.191819	-0.00263944	0.00565098	94250	4	CRP	FCRL6	intron, variant, non, coding, transcript
rs78440807	12	101679658	G	A	0.188641	-0.00244221	0.00530972	1480720	5	IGF1	UTP20	missense, variant, splice, region, non, coding, transcript, exon, upstream, gene
rs61731122	1	65098309	G	A	0.186858	-0.00239367	0.0052373	1130991	8	CRP	CACHD1	synonymous, variant, non, coding, transcript, exon, intron
rs11583974	1	55551718	G	A	0.186406	-0.00251054	0.0054892	12289	4	CHO	USP24	splice, region, variant, polypyrimidine, tract, intron, non, coding, transcript, exon
rs61731118	1	65016302	C	G	0.185258	0.00235476	0.00518451	1620318	2	APOB	CACHD1	missense, variant, non, coding, transcript, exon
rs1046668	2	152226570	A	G	0.184448	-0.00222007	0.00492747	3600729	3	CREA	TNFAIP6, RN7SL124P, MIR4773, 2	missense, variant, non, coding, transcript, exon, upstream, gene, downstream
rs4485000	10	18789724	T	G	0.184332	-0.00240058	0.00529185	526466	7	AST	CACNB2	splice, polypyrimidine, tract, variant, intron, downstream, gene
rs139859507	4	9157398	G	C	0.184182	-0.00249635	0.00548774	1421019	10	URT	FAM86KP	intron, variant, non, coding, transcript
rs4765007	12	125444975	T	C	0.183636	0.00243272	0.00536341	4146492	3	GGT	DHX37	splice, region, variant, polypyrimidine, tract, intron, non, coding, transcript, downstream, gene
rs2191906	2	210714162	A	G	0.183045	0.00233917	0.00518745	717204	2	CREA	UNC80	splice, polypyrimidine, tract, variant, intron, non, coding, transcript
rs10936575	3	168865151	T	C	0.181303	0.00222664	0.00498304	3145145	2	IGF1	MECOM	upstream, gene, variant, 5, prime, UTR, intron, downstream
rs79021989	2	27900569	A	G	0.180619	-0.0025529	0.00569486	1929018	4	IGF1	SLC4A1AP	intron, variant, downstream, gene
rs6669624	1	16460339	G	A	0.178498	0.00242316	0.00542706	242555	3	GGT	EPHA2	intron, variant, upstream, gene, downstream
rs147899431	6	116892681	G	C	0.177502	0.00215115	0.00488446	1388809	3	CHO	RWDD1	5, prime, UTR, variant, non, coding, transcript, exon, upstream, gene
rs5505	11	2182210	G	A	0.177101	0.00247844	0.00558928	2434994	5	IGF1	INS, TH, IGF2	5, prime, UTR, variant, downstream, gene, NMD, transcript, upstream
rs11739870	5	74491492	C	T	0.172889	0.00224914	0.00515455	882737	2	APOB	ANKRD31	synonymous, variant
rs41314509	10	114043596	G	A	0.171855	0.00214272	0.00494495	135120	3	HDL	TECTB	intron, variant
rs1744760	20	35740794	T	C	0.171427	-0.00222801	0.00512851	4167726	3	APOB	MROH8	missense, variant, upstream, gene
rs9257694	6	29274486	C	T	0.171364	0.00216452	0.00500198	3407517	4	URT	OR14J1	missense, variant
rs61751937	9	113312231	G	C	0.170073	-0.00221165	0.00511437	3796622	2	ALT	SVEP1	missense, variant, non, coding, transcript, exon
rs74993668	6	44140174	G	C	0.166668	0.00225679	0.0052668	2483386	4	CREA	CAPN11	intron, variant, upstream, gene, downstream
rs61741721	17	17070194	G	C	0.162661	0.00200274	0.00477875	1075199	2	CREA	MPRIP, RNU6, 767P, RP11, 45M22.3	missense, variant, intron, upstream, gene, downstream
rs41265007	1	156021079	G	A	0.161949	-0.00218053	0.00517736	695294	5	GGT	LAMTOR2, UBQLN4	upstream, gene, variant, synonymous, non, coding, transcript, exon
rs1128627	11	7686584	A	T	0.161796	0.00217629	0.00516873	2042019	2	DBP	CYB5R2	downstream, gene, variant, 3, prime, UTR, non, coding, transcript, exon
rs41307818	1	22216422	G	A	0.161234	0.00217602	0.00518136	205726	8	PHOS	HSPG2	upstream, gene, variant, intron, missense
rs137979	22	40322684	G	A	0.159767	-0.00210928	0.00505449	3941810	5	AST	GRAP2	intron, variant, 5, prime, UTR, non, coding, transcript, exon
rs35667974	2	163124637	T	C	0.158811	-0.0020003	0.00483029	2421329	2	HDL	IFIH1	missense, variant
rs4568443	6	25509976	T	C	0.158475	-0.00207435	0.00502072	356993	4	HBA1C	LRRC16A	intron, variant
rs10775583	19	36017928	G	C	0.15836	0.00211093	0.00508276	273383	4	ALB	SBSN	missense, variant, intron
rs3753069	18	43678035	C	T	0.158308	-0.00196254	0.00475621	214873	2	URA	ATP5A1	intron, variant, NMD, transcript, missense, non, coding, 5, prime, UTR
rs1800372	17	7578210	T	C	0.157445	0.00229534	0.00552933	6663	15	SHBG	TP53	synonymous, variant, downstream, gene, non, coding, transcript, exon, intron, upstream
rs144606482	6	119215217	A	G	0.153298	-0.00182594	0.0045269	3711345	2	CHO	ASF1A, MCM9	upstream, gene, variant, intron, non, coding, transcript, exon
rs1787299	18	47480660	A	G	0.147448	0.00217864	0.00545537	83008	5	APOA	MYO5B	intron, variant
rs2297495	1	62457365	C	T	0.147017	-0.00182549	0.00461671	938619	3	APOA	INADL	intron, variant, non, coding, transcript, NMD, downstream, gene, exon
rs73031792	19	35837694	C	T	0.145778	0.00190973	0.0048304	93149	4	CAL	CD22, FFAR1, MIR5196	3, prime, UTR, variant, upstream, gene, downstream, NMD, transcript
rs139014428	20	34782048	C	T	0.144125	-0.00182118	0.00465303	1034640	2	CREA	EPB41L1	intron, variant, upstream, gene
rs2056844	21	40670460	G	C	0.144055	-0.00185238	0.00472534	3383736	3	IGF1	BRWD1	missense, variant, non, coding, transcript, exon
rs34421923	9	91606812	G	A	0.142045	-0.00176777	0.00455955	64370	2	HBA1C	C9orf47, S1PR3	missense, variant, intron, upstream, gene
rs72834678	6	26108375	G	A	0.139642	-0.00187149	0.00492005	241406	3	HBA1C	HIST1H1T, HIST1H4C	upstream, gene, variant, downstream
rs147134923	2	234368935	G	A	0.139639	-0.00192846	0.00498126	159226	15	TBIL	DGKD	synonymous, variant, 3, prime, UTR, NMD, transcript, downstream, gene, upstream
rs2835772	21	38865507	C	G	0.139154	-0.00179508	0.00467382	1578783	2	IGF1	DYRK1A	intron, variant
rs79618396	22	38266376	C	G	0.138787	0.00181101	0.00471354	760610	2	HBA1C	EIF3L	intron, variant, downstream, gene, non, coding, transcript
rs16844058	2	210868224	A	G	0.138563	0.00172467	0.00451444	563142	3	CREA	UNC80, RPE	downstream, gene, variant, intron, NMD, transcript
rs10022440	4	69973726	G	A	0.138019	-0.00176014	0.00462429	158002	3	GGT	UGT2B7	intron, variant, non, coding, transcript
rs140372512	12	121176902	G	A	0.137264	0.00177355	0.00465065	160055	4	CRP	ACADS, RP11, 173P15.7	intron, variant, downstream, gene
rs2275729	10	94452430	T	G	0.13706	-0.00175118	0.00459933	411455	2	TBIL	HHEX	intron, variant, downstream, gene
rs79641926	12	124289284	G	T	0.136217	-0.00173001	0.00456336	1067891	6	HDL	DNAH10	intron, variant, non, coding, transcript
rs1799817	19	7125297	G	A	0.135872	-0.00186165	0.0048844	4142673	4	CHO	INSR	synonymous, variant, non, coding, transcript, exon, upstream, gene
rs114111786	4	106394997	C	T	0.135616	0.00162971	0.00433064	2970036	2	HDL	PPA2	intron, variant, NMD, transcript, non, coding, upstream, gene
rs115282281	2	26534041	T	C	0.13258	0.0016648	0.00446359	2120247	2	HBA1C	GPR113, EPT1	missense, variant, 3, prime, UTR, NMD, transcript, intron, non, coding, exon
rs17879807	23	110497423	C	T	0.131624	-0.00146917	0.00400162	1898611	2	LDL	CAPN6	intron, variant
rs76459245	4	147363047	A	C	0.131319	0.00155787	0.00422139	2711803	2	HBA1C	SLC10A7	intron, variant, 3, prime, UTR, non, coding, transcript, downstream, gene
rs12792498	11	5663575	T	C	0.130615	0.00177747	0.0047763	28134	3	ALP	TRIM6, TRIM34, HBG2	intron, variant, downstream, gene, non, coding, transcript
rs41279274	20	42805638	C	T	0.12827	0.00161948	0.00442144	1018304	3	APOA	JPH2	3, prime, UTR, variant, intron
rs65685	6	119136759	A	C	0.12729	0.0014904	0.00411799	3632887	3	CHO	MCM9	missense, variant, downstream, gene
rs3125734	10	63958112	C	T	0.126952	-0.00152306	0.00420323	1012335	2	TBIL	RTKN2	missense, variant
rs34950321	5	75964507	C	T	0.12645	0.00155158	0.00428302	3535574	4	ALB	IQGAP2	missense, variant, splice, region, upstream, gene, downstream
rs7822495	8	19677915	G	A	0.126	-0.0016534	0.00455174	275284	3	HDL	INTS10	synonymous, variant, downstream, gene, upstream, intron, non, coding, transcript, 3, prime, UTR, NMD
rs139907379	17	60651782	C	T	0.125396	0.00156707	0.0043377	3167440	2	SHBG	TLK2	intron, variant, non, coding, transcript
rs2270915	5	32786389	A	G	0.125137	-0.00152202	0.00423555	1716229	2	SBP	NPR3, AC026703.1, AC026703.2	missense, variant, upstream, gene, downstream
rs17499109	12	120541570	G	A	0.125111	-0.00162629	0.00449916	756913	4	GGT	RAB35	intron, variant, upstream, gene, non, coding, transcript, NMD
rs535107	1	11889468	A	G	0.124815	0.00167935	0.00464697	26349	2	SBP	CLCN6	intron, variant, downstream, gene, upstream
rs113016824	1	173495780	C	T	0.123362	-0.00149424	0.0041871	3515307	4	IGF1	SLC9C2	intron, variant, non, coding, transcript
rs2298632	1	23710475	T	C	0.123318	-0.00156272	0.00436168	3575814	3	IGF1	TCEA3, RP5, 1057J7.7	intron, variant, 3, prime, UTR, upstream, gene
rs10444471	12	4677211	G	T	0.122037	-0.00153376	0.00431209	2331224	3	PHOS	DYRK4	synonymous, variant, NMD, transcript, non, coding, exon, 3, prime, UTR
rs62213662	20	25303932	G	A	0.121389	-0.00145082	0.00412944	80978	4	ALP	ABHD12	intron, variant, NMD, transcript
rs116950586	17	37763929	G	A	0.12073	-0.00155425	0.00438645	4415038	3	HDL	NEUROD2	intron, variant, non, coding, transcript, exon
rs3739115	2	168931610	G	A	0.119904	0.00146627	0.00417058	3385644	3	TRIG	STK39	intron, variant, non, coding, transcript
rs2075262	12	109704177	A	G	0.119762	0.00149307	0.00424433	2100546	3	TBIL	ACACB	3, prime, UTR, variant, non, coding, transcript, exon, NMD
rs4641	1	156107534	C	T	0.119745	-0.00158606	0.00448908	781749	3	URT	LMNA	intron, variant, synonymous, downstream, gene, splice, region, non, coding, transcript, exon
rs2304483	16	56917953	T	C	0.11884	0.0017995	0.00511904	686858	9	HDL	SLC12A3	splice, region, variant, polypyrimidine, tract, intron
rs55691574	22	24719125	A	G	0.117897	0.00180742	0.00515245	372255	14	GGT	SPECC1L, ADORA2A	intron, variant, NMD, transcript, non, coding, downstream, gene
rs6511701	19	10625067	C	A	0.115243	0.00162089	0.004677	247228	4	IGF1	S1PR5	synonymous, variant, downstream, gene
rs143039156	8	23560484	G	T	0.115047	-0.0014758	0.00427683	3607285	3	TRIG	NKX2, 6, RP11, 175E9.1	missense, variant, upstream, gene
rs2285511	19	36015865	C	A	0.113528	-0.00155596	0.00456152	271320	3	ALB	SBSN	intron, variant
rs17272847	19	49979398	G	A	0.112735	-0.00154619	0.0045093	4458656	2	AST	FLT3LG, CTD, 3148I10.15, 3148I10.9	splice, region, variant, polypyrimidine, tract, intron, non, coding, transcript, upstream, gene, exon, NMD, missense
rs6864541	5	39364474	A	G	0.112344	0.0014074	0.00416009	132110	2	CREA	C9	intron, variant, non, coding, transcript
rs506008	1	110201699	C	T	0.112274	0.00145947	0.00429734	938302	8	APOB	GSTM4	synonymous, variant, downstream, gene, non, coding, transcript, exon
rs77586255	16	56704573	C	T	0.112246	-0.00157527	0.00463193	459575	10	HDL	MT1H, MT1G	intron, variant, upstream, gene, missense
rs78260319	17	7366348	A	C	0.112008	0.00154639	0.00452828	80121	15	SHBG	ZBTB4	missense, variant
rs41307925	1	27248275	C	T	0.111048	0.00140811	0.00416742	2009730	2	APOB	NUDC	5, prime, UTR, variant, intron, upstream, gene
rs11547656	8	22084503	C	T	0.109827	-0.00140331	0.00417497	2131304	4	TRIG	PHYHIP	synonymous, variant, non, coding, transcript, exon
rs11556955	1	159888701	C	T	0.109128	-0.00139681	0.00417072	1484815	8	TPROT	TAGLN2	synonymous, variant, non, coding, transcript, exon
rs12221035	10	69896336	G	A	0.108901	0.00128304	0.00386463	4925889	3	TBIL	MYPN	intron, variant
rs117667552	22	25251500	C	T	0.108564	-0.00138348	0.00414122	266064	14	GGT	SGSM1	splice, polypyrimidine, tract, variant, intron, non, coding, transcript
rs2305137	2	233712049	A	G	0.107115	-0.00136045	0.00410811	852268	4	CAL	GIGYF2	splice, polypyrimidine, tract, variant, intron, downstream, gene, non, coding, transcript
rs41286708	1	66100128	A	T	0.106294	0.00132659	0.00403837	120364	8	CRP	LEPR	intron, variant, downstream, gene, 3, prime, UTR
rs142407205	17	73501793	C	T	0.105997	0.00141083	0.00426781	2723041	2	HDL	CASKIN2	intron, variant, upstream, gene, downstream
rs2285264	8	16942837	C	T	0.102268	0.00129476	0.00401043	3010362	4	TRIG	MICU3	intron, variant, downstream, gene, non, coding, transcript
rs76783850	19	10204143	G	A	0.10176	0.00136064	0.00420722	1025727	5	APOB	ANGPTL6, C19orf66, CTD, 2240E14.4	synonymous, variant, downstream, gene, upstream
rs11647257	16	2029083	G	A	0.101063	-0.001289	0.00401828	1570595	5	IGF1	TBL3, NOXO1, AC005606.1	downstream, gene, variant, synonymous, 3, prime, UTR, non, coding, transcript, exon, upstream
rs28385702	1	55505804	T	A	0.100383	0.00134729	0.00420981	33625	4	CHO	PCSK9	intron, variant, upstream, gene
rs80145424	1	21799924	G	A	0.0996347	0.00129594	0.00406911	210772	8	PHOS	NBPF3	synonymous, variant, non, coding, transcript, exon, downstream, gene
rs202030645	13	41240379	G	A	0.0986146	-0.00118544	0.00376465	1248738	2	CAL	FOXO1	5, prime, UTR, variant
rs3732927	3	170586057	C	T	0.0981525	0.00113165	0.00361798	668132	3	HBA1C	RPL22L1	intron, variant, NMD, transcript, upstream, gene
rs16850948	3	140695307	C	A	0.0980194	-0.00114786	0.00366666	1208690	2	CREA	SLC25A36, RP11, 231L11.3	3, prime, UTR, variant, NMD, transcript, downstream, gene, non, coding, exon
rs56099436	19	39663757	G	A	0.0977217	-0.00123598	0.00392704	3919212	4	CAL	PAK4	intron, variant, missense, downstream, gene, upstream
rs1136165	14	103988180	T	G	0.0970612	0.00116841	0.00374233	1535320	4	GGT	CKB, RP11, 600F24.7	synonymous, variant, upstream, gene, 3, prime, UTR, NMD, transcript, non, coding, exon, downstream
rs1769316	1	53537266	G	A	0.0962116	-0.00116802	0.00375708	2337362	2	CAL	PODN, HIGD1AP11, RP11, 334A14.5	synonymous, variant, intron, downstream, gene, non, coding, transcript, exon
rs35900366	16	30199584	G	A	0.0952753	0.00113046	0.00366647	1666409	2	IGF1	CORO1A, BOLA2B, RP11, 455F5.5	intron, variant, downstream, gene, non, coding, transcript, exon, upstream
rs41318029	10	101590486	G	A	0.0952605	-0.00119619	0.00386048	348429	3	AST	ABCC2	missense, variant
rs3937387	22	43555194	G	C	0.0951225	0.00119679	0.00386069	709300	5	AST	TSPO	intron, variant, non, coding, transcript
rs112307773	4	153882002	T	C	0.094235	0.0010775	0.0035253	4870871	2	ALP	FHDC1	splice, donor, region, variant, intron
rs61747627	16	53308149	G	A	0.0940989	0.00116556	0.0037872	3653760	3	APOB	CHD9	non, coding, transcript, exon, variant, synonymous
rs41267146	1	176831561	T	C	0.0938833	0.00115951	0.0037939	179526	4	IGF1	ASTN1	3, prime, UTR, variant, intron
rs34364548	1	109714635	C	T	0.0932492	-0.00120849	0.00394379	1425366	8	APOB	KIAA1324	splice, region, variant, synonymous, non, coding, transcript, exon, 3, prime, UTR, NMD
rs2075770	14	96157331	G	T	0.092913	0.00115383	0.00377438	1368904	4	ALB	TCL1B, RP11, 1070N10.6	intron, variant, non, coding, transcript
rs11657929	17	65104666	T	G	0.0926925	0.00112645	0.00369711	1285444	3	SHBG	HELZ	synonymous, variant, 3, prime, UTR, NMD, transcript
rs141127873	1	21976289	C	T	0.0914996	0.00120915	0.00398205	346024	10	ALP	RAP1GAP	splice, region, variant, synonymous, 5, prime, UTR, non, coding, transcript, exon, NMD
rs2287842	19	47588325	G	A	0.0913968	0.0012098	0.00397246	2193653	3	ALT	ZC3H4	synonymous, variant, intron, non, coding, transcript, downstream, gene
rs2278920	4	69362527	G	C	0.0913939	-0.00110558	0.00366284	3571661	6	VITD	TMPRSS11E	3, prime, UTR, variant
rs78763949	2	174228496	C	T	0.0890678	-0.00106898	0.00358962	4139456	4	ALP	CDCA7	intron, variant, NMD, transcript, non, coding
rs1567385	2	102315057	A	G	0.0883444	0.00103695	0.00350645	1572665	3	TPROT	MAP4K4	intron, variant
rs3795504	1	180905448	G	T	0.0871526	-0.00101805	0.0034683	3894361	3	IGF1	KIAA1614	missense, variant, upstream, gene, intron, non, coding, transcript
rs1132445	5	176917897	C	T	0.0853634	-0.00105169	0.00360677	534014	2	PHOS	PDLIM7, RP11, 1334A24.6	synonymous, variant, downstream, gene, NMD, transcript, 3, prime, UTR, upstream
rs3760158	17	54921494	C	A	0.0849531	-0.00101456	0.00349722	3035020	2	TPROT	DGKE	synonymous, variant, non, coding, transcript, exon
rs76827793	6	26199064	A	G	0.0845969	0.000982341	0.00340491	332095	4	URT	HIST1H2AD, HIST1H3D, HIST1H2BF, HIST1H1PS1, RP1, 34B20.4	downstream, gene, variant, upstream, intron
rs10792260	11	60050125	G	A	0.0844266	0.00105354	0.00362988	2163285	3	GGT	MS4A4A	intron, variant, missense, NMD, transcript, 5, prime, UTR
rs3200256	1	21904108	G	T	0.0842383	0.00107114	0.0036886	273843	11	ALP	ALPL	synonymous, variant
rs17589	3	122056432	T	C	0.0838001	-0.00113842	0.00395501	713770	5	CAL	CSTA	synonymous, variant
rs41312028	1	36288635	G	A	0.0826419	-0.00101031	0.00352742	3767792	3	SHBG	AGO4	intron, variant
rs35267131	9	135977511	G	A	0.082587	0.00108847	0.00377897	267367	7	ALP	RALGDS	synonymous, variant, downstream, gene, non, coding, transcript, exon, upstream
rs147853765	7	44046900	G	A	0.0823193	-0.000981605	0.00344636	40090	4	HBA1C	SPDYE1, POLR2J4, AC004951.6, RP5, 1165K10.2	synonymous, variant, intron, non, coding, transcript, exon
rs61748578	6	24454363	G	A	0.0814898	0.000958974	0.00339534	310412	8	ALP	GPLD1	synonymous, variant
rs1875272	3	122296638	G	A	0.0812592	0.00113836	0.00400096	473564	4	CAL	DTX3L, PARP15	downstream, gene, variant, missense
rs13167812	5	176409574	G	A	0.0799933	-0.000978695	0.00347827	25691	2	PHOS	UIMC1	missense, variant, non, coding, transcript, exon, upstream, gene, NMD
rs2245938	11	58378382	G	C	0.0797023	0.00101272	0.00360348	3835028	4	GGT	ZFP91, CNTF, AP001350.1	intron, variant, NMD, transcript, downstream, gene
rs11187724	10	95658258	C	G	0.0793385	0.000952307	0.00340564	383899	2	DBP	SLC35G1	intron, variant, NMD, transcript
rs41275689	4	96469801	G	A	0.0793325	-0.000890618	0.00320513	3413484	3	CHO	UNC5C, RP11, 710C12.1	intron, variant, upstream, gene
rs149021498	16	58231487	G	A	0.0792958	0.000966239	0.00345062	1269578	3	LDL	CSNK2A2, RN7SL645P, RP11, 459F6.1	intron, variant, downstream, gene, non, coding, transcript, upstream
rs769424	17	2995994	T	C	0.0790443	0.00102435	0.00364538	4137477	3	ALP	OR1D2	synonymous, variant
rs62223645	21	38528987	G	A	0.0782198	-0.000962019	0.0034633	1242263	3	IGF1	TTC3	missense, variant, downstream, gene, upstream, non, coding, transcript, exon
rs35975487	4	148944467	A	G	0.0779243	0.000872143	0.00316993	4293223	2	HBA1C	ARHGAP10	synonymous, variant, non, coding, transcript, exon
rs17368018	4	85612894	T	C	0.0778947	-0.000891218	0.00323282	1876736	3	ALT	WDFY3, RN7SL552P	missense, variant, upstream, gene
rs3745926	19	46387503	T	C	0.0771453	0.0010095	0.003637	992831	5	HDL	IRF2BP1	synonymous, variant
rs41288578	6	110550223	T	G	0.0769339	-0.000874864	0.0031966	1597881	2	IGF1	CDC40	intron, variant, non, coding, transcript
rs7966226	12	20724791	G	C	0.0765919	0.000872002	0.00319331	149770	8	TBIL	PDE3A	intron, variant, upstream, gene
rs145127681	2	152417628	G	A	0.0763607	0.000831237	0.00306439	3791787	3	CREA	NEB	splice, region, variant, polypyrimidine, tract, intron
rs4699385	4	100574195	A	G	0.0755047	0.000856911	0.00316704	690910	3	APOB	RP11, 766F14.2	synonymous, variant
rs17593921	6	160846929	C	T	0.0753688	-0.000865692	0.00319935	676231	2	SHBG	SLC22A3	intron, variant
rs2289117	16	56936458	A	G	0.0751772	0.00097478	0.00357344	227690	10	HDL	SLC12A3, RPS24P17	intron, variant, upstream, gene, non, coding, transcript
rs7504026	17	67109673	G	A	0.0746974	0.000886254	0.00327662	3290451	3	SHBG	ABCA6	intron, variant, non, coding, transcript, exon, downstream, gene
rs28997579	2	28464198	C	T	0.0740654	0.000878182	0.00326188	4050404	3	HBA1C	BRE	synonymous, variant
rs11692304	2	103095404	G	A	0.0740504	0.000852197	0.00317511	2353012	3	TPROT	SLC9A4	synonymous, variant
rs41288339	13	45008147	T	C	0.0735392	0.000857344	0.00320157	2519030	2	CAL	TSC22D1, RP11, 71C5.2	3, prime, UTR, variant, upstream, gene, downstream, missense
rs34988207	17	76098518	G	A	0.0734304	-0.000946995	0.00350776	126316	2	APOA	TNRC6C, AS1, AC021593.1	intron, variant, downstream, gene, upstream, non, coding, transcript
rs72654423	2	21225354	T	C	0.0726739	-0.000822001	0.00309924	244113	4	LDL	APOB, RP11, 116D2.1	missense, variant, upstream, gene
rs17327630	20	29976949	C	A	0.0726638	0.000854509	0.00320889	3770459	2	CREA	DEFB119	intron, variant, missense, non, coding, transcript
rs74773964	11	116649759	T	C	0.0724623	0.000874459	0.00328328	646200	6	TRIG	ZNF259, AP006216.11, AP006216.10	missense, variant, upstream, gene, downstream
rs75296584	3	32859520	C	T	0.0724176	0.000843532	0.00317629	4230374	2	GGT	TRIM71	5, prime, UTR, variant
rs150848796	8	41522860	G	T	0.0723642	0.000816097	0.00308458	1166642	3	HBA1C	ANK1, MIR486, RP11, 930P14.1	intron, variant, upstream, gene, downstream, non, coding, transcript, exon
rs77961654	10	114925369	C	A	0.0718972	-0.000830854	0.00314322	1285851	2	SBP	TCF7L2	missense, variant, 3, prime, UTR, non, coding, transcript, exon, NMD, downstream, gene, intron
rs1553249	3	122313344	C	T	0.0717653	-0.000868051	0.00327512	456858	5	CAL	PARP15	intron, variant, upstream, gene
rs2281023	6	27277665	G	A	0.0715562	0.000801618	0.00304929	2654546	8	ALP	POM121L2	missense, variant, intron
rs187000952	12	113599650	C	T	0.0710508	0.000828492	0.00315127	1794927	4	HDL	DDX54, CCDC42B, Y, RNA, AC089999.1	intron, variant, downstream, gene, upstream
rs1554948	17	7286326	T	A	0.0709046	-0.000977546	0.00368616	125166	15	SHBG	TNK1	synonymous, variant, non, coding, transcript, exon, upstream, gene, NMD
rs35794481	12	124422262	G	A	0.0706007	-0.000858798	0.00326397	3123779	4	GGT	CCDC92, DNAH10, DNAH10OS, RP11, 380L11.3	synonymous, variant, downstream, gene, upstream, intron, non, coding, transcript
rs41296109	9	135976456	C	T	0.0704687	0.000911717	0.00345037	50215	6	ALP	RALGDS	intron, variant, downstream, gene, non, coding, transcript, exon, upstream
rs3826803	19	10883126	G	C	0.0701538	0.000925523	0.00350987	484479	4	IGF1	DNM2	intron, variant, non, coding, transcript, upstream, gene
rs1052352	16	31195279	T	C	0.0699652	0.000806221	0.00309995	2662104	3	IGF1	FUS, RP11, 388M20.6	synonymous, variant, upstream, gene, downstream, non, coding, transcript, exon, NMD
rs6708995	2	234890391	G	T	0.0694507	0.000869581	0.00330436	362230	15	TBIL	TRPM8	intron, variant, upstream, gene, NMD, transcript, non, coding
rs1800435	9	116153891	C	G	0.0685574	0.000817751	0.00316382	954962	2	AST	ALAD	missense, variant, downstream, gene, intron, non, coding, transcript, exon
rs262938	6	37139322	T	C	0.0671969	-0.000829418	0.00323328	4517466	4	CREA	PIM1	intron, variant, upstream, gene
rs61743249	5	156381631	C	T	0.0670207	0.000740427	0.00292345	165615	3	CHO	TIMD4	synonymous, variant
rs78398611	4	100341992	C	A	0.066999	0.000743828	0.00293409	519435	3	ALP	ADH7	intron, variant, upstream, gene
rs1572982	6	26094367	G	A	0.0665329	0.000923038	0.00365576	227398	4	HBA1C	HFE	intron, variant, downstream, gene, non, coding, transcript
rs61688134	12	22017410	C	T	0.0662278	-0.000741991	0.00294178	1142849	7	TBIL	ABCC9, RP11, 729I10.2	missense, variant, splice, region, intron, non, coding, transcript
rs4648039	4	103505961	C	T	0.0661786	0.000728952	0.00289646	3622676	2	IGF1	NFKB1	synonymous, variant, downstream, gene
rs3751333	13	95953617	G	A	0.0661185	0.000734811	0.00291827	201456	2	ALP	ABCC4	5, prime, UTR, variant, upstream, gene
rs9306890	2	20525948	T	C	0.0660723	0.000737044	0.00292696	943519	4	CHO	PUM2	intron, variant, non, coding, transcript, NMD
rs1953551	14	20763446	C	T	0.0659837	0.000804171	0.00316892	3946125	2	SHBG	TTC5	intron, variant, NMD, transcript, non, coding, exon
rs192240793	19	33792748	G	A	0.0659325	-0.000802876	0.00316518	1951797	4	ALB	CEBPA, AS1, AC008738.1, CTD, 2540B15.7, 2540B15.11, 2540B15.9	upstream, gene, variant, non, coding, transcript, exon, synonymous, downstream
rs4917644	10	114849399	C	T	0.0658412	-0.000754	0.00299236	1361821	2	SBP	TCF7L2	intron, variant
rs149742495	19	46324767	G	C	0.0656167	-0.000875254	0.00343916	2871281	3	URA	SYMPK	intron, variant, non, coding, transcript, upstream, gene, NMD
rs9960464	18	43246156	G	A	0.0653292	-0.000739582	0.00295264	646752	2	URA	SLC14A2, RP11, 116O18.3	missense, variant, downstream, gene, 5, prime, UTR
rs116976394	11	67811836	C	A	0.0644574	-0.000793025	0.00316146	3574859	7	URT	TCIRG1	intron, variant, downstream, gene, upstream, non, coding, transcript, NMD
rs3087886	9	139301583	C	T	0.064134	0.000822174	0.00327389	3056705	7	ALP	SDCCAG3, PMPCA	intron, variant, upstream, gene, downstream, non, coding, transcript, exon
rs1943676	18	47017820	A	G	0.0640226	0.000764569	0.00307336	147277	4	HDL	C18orf32, RPL17, SNORD58C, SNORD58A, MIR1539, SRP72P1, SNORD58B	upstream, gene, variant, intron, downstream, splice, region, polypyrimidine, tract, NMD, transcript, non, coding, exon
rs6844174	4	77303898	T	C	0.063908	-0.000756955	0.00305648	87558	2	CREA	CCDC158	intron, variant, downstream, gene
rs2231800	14	23829958	G	A	0.0634759	-0.000771855	0.00310556	879613	3	ALP	EFS, RP11, 124D2.3	synonymous, variant, intron, downstream, gene
rs79060173	3	185766711	G	A	0.063439	-0.000754041	0.00304105	238134	3	BMI	ETV5	intron, variant, NMD, transcript, non, coding
rs530436279	17	7359357	T	G	0.0630472	-0.000901752	0.00362323	212190	15	SHBG	CHRNB1, ZBTB4	intron, variant, downstream, gene
rs13011156	2	234171812	A	G	0.0625576	-0.000924515	0.00370573	392505	15	TBIL	ATG16L1	intron, variant, synonymous, 3, prime, UTR, NMD, transcript, 5, non, coding, exon, upstream, gene
rs78376944	2	181851997	T	A	0.0623829	-0.000711169	0.00290541	3314943	2	IGF1	UBE2E3	intron, variant, non, coding, transcript
rs10774907	12	117647403	G	A	0.0623378	-0.000740679	0.00301396	3369444	5	CRP	NOS1	3, prime, UTR, variant, downstream, gene
rs6535815	4	152609700	A	C	0.062028	-0.000677086	0.00278781	3598569	2	ALP	PET112	intron, variant, NMD, transcript, downstream, gene, upstream, non, coding
rs11266744	3	46449978	A	C	0.0615883	-0.000704422	0.00289676	513373	2	AST	CCRL2, RP11, 24F11.2	synonymous, variant, upstream, gene, downstream
rs117785585	19	49930352	C	A	0.0612327	-0.000780364	0.00318738	4520514	4	TRIG	SLC17A7, PTH2, GFY	downstream, gene, variant, upstream, missense
rs72782632	16	13002387	C	T	0.0610851	-0.000719556	0.00296313	3239303	2	PHOS	SHISA9	synonymous, variant, intron, non, coding, transcript, exon
rs72840988	17	7258481	C	T	0.0604214	0.000790465	0.00325456	125010	4	ALP	ACAP1, TMEM95, KCTD11, RP11, 542C16.1	downstream, gene, variant, upstream, 5, prime, UTR
rs4900833	14	36768276	C	T	0.0603203	-0.000624776	0.0026254	1931871	2	VITD	MBIP	3, prime, UTR, variant, downstream, gene
rs4696782	4	8221058	A	G	0.0601197	0.000706265	0.00293393	2274580	4	SHBG	SH3TC1	splice, region, variant, polypyrimidine, tract, intron, NMD, transcript, downstream, gene, non, coding
rs646335	1	109836842	G	C	0.0598916	-0.000798835	0.00332385	1303159	8	APOB	MYBPHL	3, prime, UTR, variant, non, coding, transcript, exon
rs116534917	3	58870321	C	T	0.0598403	0.000679246	0.00284192	395719	4	AST	C3orf67, RP11, 147N17.1	missense, variant, intron, non, coding, transcript, 3, prime, UTR, NMD, downstream, gene
rs111698028	19	11027513	C	T	0.0598263	0.000775731	0.00320427	649674	4	IGF1	CARM1	intron, variant, NMD, transcript, upstream, gene, downstream
rs2058194	17	62020348	C	T	0.0590641	0.000692901	0.00290891	12224	3	IGF1	SCN4A	missense, variant, downstream, gene
rs6647	14	94847415	A	G	0.0589314	-0.000716524	0.00300436	58988	4	ALB	SERPINA1	missense, variant, NMD, transcript, downstream, gene
rs116499739	4	10502787	C	T	0.0589034	0.000713354	0.00298973	38690	10	URT	CLNK	intron, variant
rs58191032	18	47489430	G	A	0.0584397	-0.00070299	0.00297367	47487	5	APOA	MYO5B	intron, variant
rs11550914	11	65667828	C	T	0.0584395	0.000702492	0.0029559	4033373	2	TRIG	FOSL1	5, prime, UTR, variant, intron
rs113130058	1	110260040	A	G	0.0582515	0.000697418	0.00294402	879961	8	APOB	GSTM5	missense, variant, 3, prime, UTR, intron, non, coding, transcript, exon
rs7633797	3	125653291	G	A	0.0581692	0.000685953	0.00289876	2350609	2	HBA1C	ALG1L, FAM86JP	intron, variant, downstream, gene
rs10788804	1	151337788	G	A	0.0581571	0.000710574	0.00299335	3987997	3	URT	SELENBP1	intron, variant, NMD, transcript, downstream, gene, non, coding, exon
rs79350765	17	79614951	C	T	0.0579658	-0.000700172	0.00295706	1047236	6	HBA1C	TSPAN10, PDE6G, NPLOC4	missense, variant, downstream, gene, non, coding, transcript, exon, intron, synonymous
rs2307227	16	55855361	G	T	0.0575074	0.000669323	0.0028489	2028994	3	AST	CES1	missense, variant, non, coding, transcript, exon, upstream, gene
rs363315	10	118969346	T	C	0.0574643	-0.000648976	0.00277154	2758126	4	HDL	KCNK18	missense, variant
rs2036342	3	122290579	C	T	0.057392	-0.000727753	0.00309619	479623	5	CAL	DTX3L	synonymous, variant
rs3826593	18	56204747	A	G	0.0573553	-0.000646132	0.0027678	209461	2	ALT	ALPK2, RP11, 1151B14.4	missense, variant, downstream, gene, upstream, non, coding, transcript, exon
rs56157240	20	25059381	A	T	0.057313	-0.000631231	0.0027289	163573	4	ALP	VSX1	synonymous, variant, intron, downstream, gene, NMD, transcript, upstream
rs41265499	6	72971728	G	A	0.0570681	-0.00062596	0.00269113	1177917	2	CAL	RIMS1	intron, variant, non, coding, transcript, exon
rs2290070	5	44305309	C	G	0.056756	-0.000633911	0.00272802	4808725	2	CREA	FGF10	splice, polypyrimidine, tract, variant, intron
rs755684	13	95097956	T	C	0.0564006	-0.000617595	0.00267338	1057117	2	ALP	DCT	intron, variant, synonymous, NMD, transcript
rs556085	6	163522166	A	G	0.055552	-0.000608884	0.00265531	1999006	2	SHBG	PACRG	intron, variant, NMD, transcript
rs11746136	5	52781029	G	A	0.054982	0.000572776	0.00252567	455546	2	GGT	FST	synonymous, variant, downstream, gene
rs33994928	2	27505758	C	T	0.0549584	0.000663163	0.00288549	1534207	5	IGF1	DNAJC5G, TRIM54	downstream, gene, variant, synonymous
rs7577785	2	101096872	G	A	0.0548789	0.000609756	0.00267264	354480	3	TPROT	NMS	intron, variant
rs7652177	3	171969077	G	C	0.0544312	0.000586155	0.00258886	714888	3	HBA1C	FNDC3B	missense, variant, non, coding, transcript, exon
rs111990331	6	33647936	C	T	0.0541714	0.000756791	0.00330439	59426	6	PHOS	ITPR3	intron, variant
rs3195579	6	54219326	G	A	0.0539146	-0.000612576	0.00270401	3409394	3	BMI	TINAG	missense, variant
rs146294421	17	66430795	A	G	0.0539	-0.000619529	0.00273167	4398223	3	IGF1	WIPI1, RP11, 120M18.2	intron, variant, non, coding, transcript, upstream, gene, NMD
rs1052053	1	156202173	A	G	0.0538992	0.000630765	0.00277725	2419216	3	VITD	PMF1, BGLAP	missense, variant, intron, 3, prime, UTR, NMD, transcript, non, coding
rs117018379	17	40963597	C	T	0.0538946	0.000639215	0.00281041	1215370	4	HDL	CNTD1, BECN1	non, coding, transcript, exon, variant, intron, downstream, gene, NMD
rs2531332	16	1994749	A	C	0.0538182	0.000656057	0.00288249	1604498	5	IGF1	RPL3L, MSRB1	3, prime, UTR, variant, upstream, gene
rs7259560	19	49965173	A	T	0.0537877	0.000677745	0.00296712	4555335	4	TRIG	ALDH16A1, CTD, 3148I10.9	synonymous, variant, intron, 3, prime, UTR, NMD, transcript, downstream, gene, upstream, non, coding, exon
rs12554062	9	137733937	T	G	0.0533721	-0.000673187	0.00295774	1489059	7	ALP	COL5A1	intron, variant
rs144901445	18	43262448	A	C	0.0533329	-0.000601451	0.00267157	4179495	4	HDL	SLC14A2, RP11, 116O18.3	synonymous, variant, intron, non, coding, transcript
rs186765168	19	50156733	A	G	0.0531544	0.000711954	0.00312515	55197	4	TPROT	SCAF1	synonymous, variant, downstream, gene
rs116515695	4	8230053	C	T	0.052906	-0.000613255	0.0027286	2257204	3	SHBG	SH3TC1	missense, variant, upstream, gene, 3, prime, UTR, NMD, transcript, non, coding, exon, downstream
rs4149336	9	107550639	A	G	0.0527908	-0.00061392	0.00275668	80957	6	APOA	ABCA1	intron, variant
rs10853104	17	47092076	T	C	0.0527724	0.000613955	0.00273578	234144	5	SHBG	IGF2BP1, RP11, 501C14.6	intron, variant, non, coding, transcript, upstream, gene
rs141454251	16	85743906	T	A	0.0526978	0.000624845	0.00277984	1301524	4	HBA1C	C16orf74	missense, variant, 5, prime, UTR, splice, polypyrimidine, tract, intron, non, coding, transcript
rs41285400	1	65243466	A	G	0.0525784	0.000591004	0.00264567	1847482	3	TRIG	RAVER2	synonymous, variant, upstream, gene
rs9951895	18	46343818	T	C	0.0521057	0.000584313	0.00263128	1098125	6	APOA	CTIF	intron, variant, non, coding, transcript
rs3816655	12	21722014	C	T	0.0519586	-0.00056699	0.00256232	847453	8	TBIL	GYS2	intron, variant
rs34380065	19	51841417	T	C	0.0517976	-0.000676068	0.00300572	2645369	8	LDL	VSIG10L, CTD, 2616J11.16	missense, variant, upstream, gene, NMD, transcript
rs62623594	1	60019853	C	T	0.0515333	0.000590174	0.00266456	4481016	5	LDL	FGGY	missense, variant, 5, prime, UTR, NMD, transcript, non, coding, exon
rs1007469	12	120791042	A	G	0.0514849	0.000613523	0.00276336	613480	4	GGT	MSI1	intron, variant, downstream, gene
rs28364330	4	100201477	G	A	0.050931	-0.000551397	0.00252277	378920	3	ALP	ADH1A, RP11, 696N14.1	intron, variant, non, coding, transcript, downstream, gene
rs77760734	2	25059745	T	G	0.0509094	-0.000580331	0.00263914	645951	3	HBA1C	ADCY3	intron, variant, downstream, gene, upstream, non, coding, transcript
rs2777905	1	110172592	C	A	0.0506467	-0.000569545	0.00260139	2210166	2	SHBG	AMPD2, RP5, 1160K1.6	intron, variant, non, coding, transcript, downstream, gene, upstream
rs56199175	22	25119210	A	C	0.0504512	-0.000603388	0.00274426	179953	14	GGT	PIWIL3	synonymous, variant, non, coding, transcript, exon
rs10799710	1	19483209	A	G	0.0504343	0.000607146	0.00276032	3059377	2	AST	UBR4	intron, variant, non, coding, transcript, upstream, gene
rs75169347	11	65293819	G	A	0.0501271	-0.000593715	0.00271194	3659364	2	TPROT	SCYL1	splice, region, variant, synonymous, upstream, gene
rs80254867	1	155148520	G	A	0.0501161	0.000608972	0.00277404	4459078	5	CRP	KRTCAP2, TRIM46, RP11, 201K10.3	upstream, gene, variant, missense, non, coding, transcript, exon, intron
rs3829947	14	93118038	G	A	0.0500839	0.000585536	0.00267878	1670389	4	ALB	RIN3	missense, variant, non, coding, transcript, exon, 3, prime, UTR, NMD, upstream, gene
rs41282774	20	44515133	A	G	0.0499927	-0.000581633	0.0026649	4606613	3	APOB	CTSA, NEURL2, SPATA25, ZSWIM1	upstream, gene, variant, downstream, 3, prime, UTR
rs12233757	4	81792668	T	G	0.0498634	-0.000549305	0.00253389	4576328	2	CREA	C4orf22	intron, variant, non, coding, transcript, 3, prime, UTR, NMD
rs3213570	12	121222411	C	G	0.0496014	0.000607489	0.00279544	76072	4	GGT	SPPL3	splice, polypyrimidine, tract, variant, intron, non, coding, transcript
rs118176996	12	121756058	A	G	0.0495323	-0.00058043	0.00267121	739211	5	CRP	ANAPC5	intron, variant, downstream, gene, non, coding, transcript, NMD
rs35120918	13	111143541	G	A	0.0493244	0.000548935	0.00254395	1169948	2	CHO	COL4A2	intron, variant
rs140340146	17	7369962	G	A	0.0493228	0.000645697	0.00295565	486765	15	SHBG	ZBTB4	synonymous, variant
rs117112913	15	75632280	C	T	0.049275	0.000567821	0.00262548	397389	2	URT	COMMD4	intron, variant, NMD, transcript, downstream, gene, non, coding, exon
rs9293683	5	75700310	T	C	0.049243	0.000563868	0.00260812	176152	2	TPROT	IQGAP2	intron, variant, 5, prime, UTR
rs652785	1	57340727	C	A	0.0492161	0.000563569	0.00260667	1801890	5	APOB	C8A	missense, variant
rs71417803	14	102964133	A	G	0.049159	-0.000556821	0.00258305	511273	4	GGT	TECPR2, RNU6, 244P	intron, variant, upstream, gene, non, coding, transcript
rs79452453	22	25020102	C	T	0.048849	0.000586116	0.00271071	71278	14	GGT	GGT1	intron, variant, upstream, gene, downstream, NMD, transcript, non, coding
rs4988344	17	59924612	G	C	0.0487027	-0.000553975	0.00257875	3894610	3	SHBG	BRIP1	intron, variant
rs139262200	2	42997573	A	G	0.0486632	0.000535078	0.00250054	689531	3	DBP	HAAO	intron, variant, non, coding, transcript, exon, upstream, gene
rs117019375	7	47408732	G	A	0.048647	0.000542901	0.00253339	1035342	3	IGF1	TNS3	missense, variant, downstream, gene
rs7677237	4	89306659	T	C	0.0481244	0.000509548	0.00240373	450760	2	URT	HERC6	missense, variant, 3, prime, UTR, NMD, transcript, non, coding, exon
rs1071862	12	125398039	C	G	0.0481093	-0.000565914	0.002652	40864	6	HDL	UBC, MIR5188	synonymous, variant, downstream, gene, splice, donor, region, intron, non, coding, transcript, exon, upstream
rs3907424	8	81733727	C	A	0.0475679	-0.000467899	0.00224178	308501	2	SHBG	ZNF704	missense, variant
rs139304762	2	149840380	G	C	0.0474998	0.000487173	0.0023235	1214539	3	CREA	KIF5C	intron, variant, non, coding, transcript
rs35638197	17	47284735	T	C	0.04748	-0.000558869	0.00263551	41485	4	SHBG	ABI3, GNGT2	upstream, gene, variant, missense
rs45466292	19	14515368	C	T	0.0473853	-0.00059393	0.00277923	3305495	5	APOB	DDX39A, CD97, CTC, 548K16.5	downstream, gene, variant, synonymous, intron, non, coding, transcript, exon
rs2276025	11	126145931	T	C	0.0472701	0.000554616	0.00262134	96545	4	ALP	FOXRED1, RPL35AP26	intron, variant, downstream, gene, non, coding, transcript, NMD, upstream
rs61749603	5	68414334	G	A	0.0471728	0.000521376	0.00247492	4014599	4	ALB	SLC30A5, CTC, 498J12.3	missense, variant, intron, non, coding, transcript, exon, upstream, gene, NMD
rs1609993	4	103514658	C	T	0.0469604	0.000502407	0.0024	89697	3	HDL	NFKB1	synonymous, variant, non, coding, transcript, exon
rs565921	11	65714925	C	T	0.0467381	0.000548755	0.00260211	4080470	2	CHO	TSGA10IP	downstream, gene, variant, non, coding, transcript, exon, intron, missense
rs16925347	10	70101417	G	C	0.0466919	-0.000540337	0.0025683	1698800	10	HBA1C	RUFY2, HNRNPH3	downstream, gene, variant, missense, intron, NMD, transcript, non, coding, exon
rs62303973	4	84519828	G	A	0.0464567	0.0005014	0.00240527	2969802	2	SHBG	AGPAT9	missense, variant, non, coding, transcript, exon, downstream, gene
rs12595297	15	101550858	T	G	0.0462929	0.000495544	0.00238376	2956971	3	URT	LRRK1	intron, variant, NMD, transcript
rs35040354	4	83839213	A	G	0.0461708	-0.000498104	0.00239733	3650417	2	SHBG	THAP9, LIN54	synonymous, variant, 3, prime, UTR, NMD, transcript, intron, non, coding, downstream, gene
rs78366259	1	113254648	A	G	0.0460957	-0.000542283	0.0025901	25655	3	CREA	RHOC, PPM1J, RP11, 426L16.10, 426L16.9	upstream, gene, variant, missense, NMD, transcript, 3, prime, UTR, downstream
rs34931250	17	66879927	C	T	0.0460816	-0.000517347	0.00248208	3060705	2	APOB	ABCA8	splice, donor, 5th, base, variant, intron, downstream, gene, non, coding, transcript, upstream
rs41317515	1	150526044	C	G	0.046004	-0.000559575	0.00266992	4799741	5	GGT	ADAMTSL4, RP11, 54A4.2, AL356356.1, MIR4257	missense, variant, intron, non, coding, transcript, downstream, gene, upstream
rs146125583	9	140648752	C	T	0.0459834	-0.000570913	0.00271559	4403874	7	ALP	EHMT1	intron, variant, non, coding, transcript, NMD
rs61749601	5	67575548	T	C	0.0457071	-0.000503087	0.0024294	4853385	4	ALB	PIK3R1	synonymous, variant, upstream, gene
rs61757649	2	27461496	C	T	0.0454707	-0.000512478	0.00247494	2414870	2	BMI	CAD	synonymous, variant, upstream, gene, downstream
rs12610889	19	36038174	A	G	0.0454675	0.000609964	0.00293361	293629	4	ALB	TMEM147, GAPDHS, ATP4A, AD000090.2	intron, variant, downstream, gene, 3, prime, UTR, upstream, non, coding, transcript, NMD
rs188992106	2	178936198	G	A	0.0453465	-0.000505827	0.00244878	3754059	2	HBA1C	PDE11A	intron, variant
rs179008	23	12903659	A	T	0.0450861	0.000486095	0.00236888	1946446	2	HDL	TLR7	missense, variant
rs59193147	10	102792230	G	T	0.0449136	-0.00051549	0.0025011	1091673	3	ALT	SFXN3, PDZD7	5, prime, UTR, variant, upstream, gene
rs141569354	3	47046485	C	T	0.044777	-0.000494096	0.00241074	1109880	2	AST	NBEAL2	synonymous, variant, upstream, gene, intron, NMD, transcript, downstream, non, coding, exon
rs1558781	12	107937768	G	A	0.04441	-0.000496303	0.00242851	3866955	3	TBIL	BTBD11	missense, variant
rs45550834	6	131276473	A	G	0.0443211	0.000497455	0.00243641	1030562	3	PHOS	EPB41L2	splice, polypyrimidine, tract, variant, intron, non, coding, transcript, downstream, gene
rs17884481	12	123200693	G	A	0.0442206	0.000514263	0.00251185	1902210	4	GGT	HCAR1, HCAR3, RP11, 324E6.6	intron, variant, missense, downstream, gene
rs12149018	16	57664204	G	A	0.0441813	-0.000507946	0.00248539	702295	3	LDL	GPR56, RP11, 405F3.5	intron, variant, upstream, gene, non, coding, transcript, NMD
rs4845364	1	154141908	G	A	0.0441614	-0.000523827	0.00255728	731967	7	CRP	TPM3, RN7SL431P	intron, variant, non, coding, transcript, downstream, gene, NMD, upstream
rs148912324	15	93616447	G	A	0.0441295	-0.000499633	0.00244974	2804107	3	SBP	RGMA	intron, variant, upstream, gene, NMD, transcript
rs2072275	10	117856145	C	T	0.0438577	-0.000469105	0.00232114	3947669	3	APOA	GFRA1	intron, variant
rs1042114	1	29138975	T	G	0.0437803	-0.00050053	0.00246229	1852686	3	IGF1	OPRD1	missense, variant
rs62617140	2	207827220	G	A	0.0437081	0.000474011	0.00234613	3604146	2	URA	CPO	missense, variant
rs183409343	1	63153866	C	G	0.0436453	-0.000489319	0.00242341	242118	2	CHO	DOCK7, RP11, 230B22.1	intron, variant, upstream, gene
rs79877551	17	44950225	T	C	0.0435535	-0.000510479	0.00251735	2771258	4	HDL	WNT9B	intron, variant
rs41297895	11	120690618	C	G	0.0432173	-0.000487561	0.00241742	4128054	3	APOB	GRIK4	missense, variant, downstream, gene, non, coding, transcript, exon
rs1280396	15	57731728	G	A	0.0430886	0.000491522	0.0024552	3796067	2	CREA	CGNL1	missense, variant, downstream, gene
rs7571133	2	233470843	A	G	0.0430614	0.000510647	0.00250335	1093474	15	TBIL	EFHD1, AC073254.1	5, prime, UTR, variant, intron, non, coding, transcript
rs4909945	11	10673739	C	T	0.0427651	-0.000509933	0.00252921	945136	2	DBP	MRVI1	missense, variant, splice, polypyrimidine, tract, intron, upstream, gene, NMD, transcript, non, coding, 5, prime, UTR
rs17120419	11	117061467	C	T	0.0425056	-0.000526408	0.00262393	336873	8	APOA	SIDT2	intron, variant, downstream, gene, non, coding, transcript, exon, upstream
rs422496	19	11409684	A	G	0.042505	-0.000529072	0.00262359	112558	2	SBP	TSPAN16, CTC, 510F12.4	intron, variant, NMD, transcript, downstream, gene
rs2253603	15	40565055	A	G	0.0424936	0.000471071	0.00236045	895531	4	CREA	PAK6, RP11, 133K1.2	splice, polypyrimidine, tract, variant, intron, upstream, gene, downstream, NMD, transcript, non, coding
rs1143671	3	121647286	C	T	0.042397	-0.000483506	0.00241902	1655396	2	HBA1C	SLC15A2	missense, variant, non, coding, transcript, exon
rs34004825	19	40978453	G	A	0.0421595	0.00051718	0.0025781	386334	5	ALP	SPTBN4	intron, variant
rs1963645	1	162333990	A	G	0.0420888	-0.000496739	0.00248632	960474	8	TPROT	NOS1AP, C1orf226, RP11, 565P22.6	intron, variant, upstream, gene, NMD, transcript, 5, prime, UTR
rs41270313	5	32387558	T	C	0.0419309	0.00044391	0.00225137	2115060	2	SBP	ZFR	intron, variant, NMD, transcript, upstream, gene
rs279782	1	16778265	T	G	0.0419282	-0.000500802	0.0025112	354433	2	ALT	NECAP2	intron, variant, NMD, transcript, non, coding, exon, downstream, gene, upstream
rs35979566	19	41518598	T	A	0.0417813	0.000516991	0.00258692	3876074	3	ALT	CYP2B6	missense, variant, intron, non, coding, transcript
rs13320485	3	136664737	C	T	0.0414149	-0.00045203	0.00230336	738024	3	SHBG	NCK1, IL20RB	missense, variant, intron, non, coding, transcript, exon, upstream, gene, downstream
rs189737503	19	49167779	C	T	0.0413908	-0.000581853	0.00292294	51138	7	ALP	NTN5, SEC1P	intron, variant, non, coding, transcript
rs142326941	2	161141623	C	T	0.0413561	-0.000450199	0.00229234	4404343	3	SHBG	RBMS1	intron, variant, non, coding, transcript, upstream, gene
rs11078892	17	37371519	C	T	0.0413378	0.000479536	0.002428	4807448	4	HDL	STAC2	intron, variant, NMD, transcript
rs34830321	16	58616997	C	T	0.0411608	0.000476532	0.00241397	1452849	10	HDL	CNOT1	missense, variant, intron, NMD, transcript
rs181557677	1	26673095	G	A	0.0411014	-0.000485743	0.00245929	4662399	11	ALP	AIM1L, RN7SL490P	upstream, gene, variant, intron, NMD, transcript, synonymous, downstream
rs7972737	12	4737042	A	G	0.0410893	-0.000465364	0.00237196	2271393	3	PHOS	AKAP3, RP11, 500M8.7	synonymous, variant, downstream, gene, intron, NMD, transcript
rs550510	17	46926615	G	A	0.0409469	0.000462908	0.00236089	399605	5	SHBG	CALCOCO2	missense, variant, splice, region, intron, downstream, gene, upstream, non, coding, transcript, exon
rs35230921	6	117861923	A	G	0.0408314	0.000414829	0.00214296	2358051	3	CHO	DCBLD1, GOPC	synonymous, variant, intron, NMD, transcript, non, coding, upstream, gene, exon
rs11552797	7	44099664	T	C	0.040827	0.00046018	0.00235899	92854	5	HBA1C	PGAM2, DBNL, AC017116.11	downstream, gene, variant, 3, prime, UTR, NMD, transcript, upstream, synonymous, non, coding, exon
rs2561545	19	41186879	A	G	0.0408227	-0.00049445	0.00250955	177908	5	ALP	NUMBL	synonymous, variant, non, coding, transcript, exon, downstream, gene
rs2251702	6	24797647	A	G	0.0408162	0.000438743	0.00225966	174528	8	ALP	FAM65B, C6orf229	3, prime, UTR, variant, synonymous
rs76907345	19	50285809	C	T	0.0407177	-0.000516902	0.00261595	184273	3	ALB	AP2A1	synonymous, variant, intron, NMD, transcript, non, coding, exon
rs11568563	12	21457434	T	G	0.0401359	-0.000435344	0.00225953	582873	8	TBIL	SLCO1A2	missense, variant, downstream, gene, non, coding, transcript, exon, 3, prime, UTR, NMD
rs72654103	4	88403609	G	A	0.0400114	-0.000434089	0.00225433	913979	3	ALT	SPARCL1	synonymous, variant
rs9626578	22	45243780	G	A	0.0399438	-0.000464706	0.00239327	979286	5	AST	ARHGAP8, PRR5	intron, variant, NMD, transcript, non, coding
rs3822015	4	81189603	A	C	0.0398851	0.000427969	0.00222394	3973263	2	CREA	FGF5	intron, variant, non, coding, transcript, exon, NMD
rs10981762	9	116116483	G	A	0.0396913	0.000446947	0.00231701	992370	2	AST	BSPRY	intron, variant, non, coding, transcript
rs2043878	15	44089222	C	G	0.0393413	0.000431178	0.00225284	1985137	2	IGF1	SERINC4, SERF2, HYPK, MIR1282, RP11, 296A16.1	intron, variant, downstream, gene, 5, prime, UTR, upstream, NMD, transcript, non, coding, exon
rs73005330	2	210883027	G	A	0.0392496	0.00042082	0.00220575	548339	2	URT	KANSL1L, RPE	downstream, gene, variant, intron
rs9792967	1	153588279	G	A	0.0391381	-0.000462514	0.00240405	1737506	5	GGT	S100A13, S100A14, S100A16	downstream, gene, variant, intron, non, coding, transcript, upstream
rs62106244	19	10274120	C	T	0.0391283	-0.000481347	0.00249331	1248122	2	SBP	DNMT1	intron, variant, upstream, gene, downstream, non, coding, transcript, NMD
rs78565404	3	184090242	C	T	0.0390346	-0.00044094	0.00230474	2214782	2	CAL	THPO, POLR2H, EIF2B5	3, prime, UTR, variant, downstream, gene, intron
rs4794136	17	48433958	T	C	0.0390307	0.000437167	0.00228694	1107738	5	SHBG	XYLT2	synonymous, variant, NMD, transcript, downstream, gene, upstream
rs1258184	10	50960209	G	A	0.0389946	-0.000405956	0.00214168	2546810	2	CREA	OGDHL	synonymous, variant, 5, prime, UTR, downstream, gene
rs6674775	1	110950439	T	C	0.0389624	0.00042412	0.00222734	2988013	2	SHBG	LAMTOR5, AS1	missense, variant, non, coding, transcript, exon, upstream, gene, intron
rs76459697	2	163257044	T	C	0.0389048	0.000420539	0.00221197	2288922	3	SHBG	KCNH7	intron, variant
rs1693425	4	100266112	C	T	0.0388411	0.00040376	0.0021351	3158849	2	APOA	ADH1C	non, coding, transcript, exon, variant, synonymous
rs7031621	9	139101772	A	G	0.0388058	0.00047566	0.00247403	2856894	7	ALP	QSOX2, LHX3	intron, variant, upstream, gene, downstream
rs676363	1	23713952	G	T	0.0387082	0.00043954	0.00230697	3572337	2	SHBG	TCEA3	intron, variant, upstream, gene
rs17378109	16	57663958	A	G	0.0386566	-0.000438043	0.00230054	702049	3	LDL	GPR56, RP11, 405F3.5	intron, variant, upstream, gene, non, coding, transcript, NMD
rs4646207	13	99404761	T	C	0.0385098	-0.000400909	0.00212881	3249688	2	ALP	SLC15A1	intron, variant
rs9349688	6	53762092	A	G	0.0384088	-0.000419328	0.00221808	2952160	3	BMI	LRRC1	missense, variant, synonymous, NMD, transcript
rs61743984	1	20639345	C	A	0.0382443	-0.000448778	0.00236191	1426689	8	PHOS	VWA5B1, RP4, 745E8.2	synonymous, variant, 5, prime, UTR, intron, non, coding, transcript, NMD
rs1061338	19	33878198	A	G	0.0381136	0.000442464	0.0023353	1866347	4	CAL	PEPD, CEBPG	3, prime, UTR, variant, downstream, gene, non, coding, transcript, exon
rs6565653	17	78201783	G	T	0.0377452	0.000436589	0.0023163	365932	6	HBA1C	SLC26A11	intron, variant, non, coding, transcript, downstream, gene
rs529816098	11	65314097	G	C	0.0376454	0.000432926	0.00230177	3679642	2	TPROT	LTBP3	intron, variant, upstream, gene, downstream, NMD, transcript, 5, prime, UTR
rs3746816	20	47361519	T	C	0.0375914	0.00041876	0.00223498	3537577	3	APOA	PREX1	intron, variant
rs72792970	2	28748838	T	C	0.0375463	-0.00043055	0.00229574	2777287	5	IGF1	PLB1	intron, variant
rs72972543	11	93911830	G	A	0.0374904	0.000384526	0.00207482	1397046	3	ALT	PANX1	intron, variant
rs7184427	16	88804734	G	A	0.0373006	-0.000455368	0.00243584	1759304	4	HBA1C	PIEZO1, RP5, 1142A6.8, 1142A6.2, 1142A6.7	missense, variant, upstream, gene, non, coding, transcript, exon
rs3747479	5	44809162	G	C	0.0372089	0.00038609	0.00208761	4498199	2	URA	RP11, 53O19.1, MRPS30	upstream, gene, variant, missense
rs2276060	11	118919132	G	A	0.0370587	-0.000415048	0.0022302	2194538	8	APOA	HYOU1, RP11, 110I1.6	intron, variant, upstream, gene, downstream, non, coding, transcript, exon, NMD
rs34149579	12	123345509	G	T	0.0370438	0.00041847	0.00224988	2011666	6	HDL	HIP1R, VPS37B, RP11, 463O12.3	missense, variant, downstream, gene, non, coding, transcript, exon, upstream
rs2016465	8	81905397	A	G	0.0369512	-0.000350096	0.00192193	480171	2	SHBG	PAG1	synonymous, variant
rs6029672	20	40049099	G	A	0.036884	-0.000442156	0.00239511	3774843	3	CHO	CHD6	intron, variant
rs12449858	17	76121318	G	A	0.0368781	0.0004323	0.00232226	2446397	6	HBA1C	TMC6	missense, variant, 5, prime, UTR, upstream, gene, downstream, non, coding, transcript, exon
rs35338149	1	39381448	G	A	0.036861	-0.000423436	0.00228086	674979	3	SHBG	RHBDL2, RP5, 864K19.4	intron, variant, non, coding, transcript
rs145454538	22	43894121	C	T	0.0368135	-0.00042277	0.00227419	370373	4	ALT	MPPED1	synonymous, variant
rs112568463	22	24236588	A	T	0.0365655	0.000423393	0.00228279	854792	14	GGT	MIF, AP000350.4, AP000350.10	5, prime, UTR, variant, downstream, gene, intron, upstream
rs11207827	1	62232130	T	C	0.0363858	0.0003924	0.00213701	1163854	3	TRIG	INADL	synonymous, variant, non, coding, transcript, exon
rs4908760	1	8526142	A	G	0.0363749	0.000419288	0.00226868	3336977	2	DBP	RERE	intron, variant, non, coding, transcript
rs144424576	3	38163900	C	T	0.0362725	0.000391099	0.00213366	1074006	2	GGT	ACAA1, DLEC1, Y, RNA	downstream, gene, variant, synonymous, missense, intron, non, coding, transcript, exon
rs11121	2	27359887	C	T	0.0362517	0.000399564	0.00217631	2946093	3	HBA1C	PREB, C2orf53	upstream, gene, variant, 3, prime, UTR, downstream
rs112519623	4	103184239	G	A	0.0362149	0.000374791	0.00205649	240722	3	HDL	SLC39A8	missense, variant, intron
rs3812746	11	12282619	G	T	0.0360631	0.000422493	0.00229272	2554016	2	DBP	MICAL2, RP11, 265D17.2	intron, variant, downstream, gene, non, coding, transcript, exon
rs79258602	16	71961535	A	C	0.0359411	0.000394031	0.00215926	166022	2	LDL	IST1, PKD1L3, RP11, 498D10.5, 498D10.6	missense, variant, downstream, gene, 3, prime, UTR, NMD, transcript, non, coding, exon, upstream
rs1489949	3	56674190	C	A	0.0359054	0.00037871	0.00208182	1800412	4	AST	FAM208A	intron, variant
rs35584545	8	80976802	C	T	0.0358812	0.000359813	0.00199034	4523775	3	URT	TPD52	missense, variant, NMD, transcript, upstream, gene, stop, retained, non, coding, exon, 5, prime, UTR, intron, downstream
rs12147696	14	95669334	C	T	0.0357787	0.00040199	0.00219917	880907	3	SHBG	CLMN, RP11, 725G5.3	synonymous, variant, downstream, gene, non, coding, transcript, exon
rs76424707	16	71004735	G	A	0.035766	0.000387702	0.00212976	790778	2	LDL	HYDIN	intron, variant, non, coding, transcript
rs577285023	1	22928305	G	T	0.0357016	0.000415262	0.00226508	1298040	11	ALP	EPHA8	3, prime, UTR, variant
rs118107504	11	65635719	C	T	0.0356903	-0.000408254	0.00223232	4001264	2	ALP	EFEMP2, MUS81	intron, variant, downstream, gene, upstream, non, coding, transcript, NMD
rs28393777	7	45144997	C	T	0.0356661	-0.000384046	0.00211406	1138187	5	HBA1C	TBRG4, SNORA5B, SNORA5C, SNORA5A	intron, variant, downstream, gene, upstream, non, coding, transcript, exon
rs59620469	5	74491956	T	C	0.0353811	-0.000388695	0.00214424	882273	2	APOB	ANKRD31	missense, variant
rs2304973	17	4642222	G	A	0.0351042	-0.000422871	0.00232109	2491249	4	ALP	ZMYND15, CXCL16	upstream, gene, variant, splice, region, polypyrimidine, tract, intron, 5, prime, UTR
rs8192704	17	37898722	G	A	0.0350784	-0.000399497	0.00221469	68902	3	CREA	GRB7	intron, variant, upstream, gene, non, coding, transcript, NMD, downstream
rs2066459	2	190708712	G	A	0.0350069	0.000346546	0.00194469	1521385	2	GGT	PMS1	3, prime, UTR, variant, NMD, transcript, intron, missense, non, coding
rs11777510	8	37706057	A	T	0.0346461	0.000357009	0.00200458	2650161	3	HBA1C	BRF2, GPR124	intron, variant, downstream, gene, NMD, transcript
rs61861308	10	60583584	C	T	0.0345415	-0.000361943	0.00203138	230226	4	URT	BICC1	intron, variant
rs75066754	10	98797360	C	T	0.0344707	-0.000376811	0.0021074	2755203	2	SBP	SLIT1, ARHGAP19	intron, variant, downstream, gene
rs7297606	12	119568596	G	A	0.0344121	0.000385105	0.00214961	1729887	5	CRP	SRRM4	missense, variant, non, coding, transcript, exon, downstream, gene
rs7514278	1	179437827	A	G	0.0343028	-0.000360285	0.00202888	2426740	4	IGF1	AXDND1	intron, variant, non, coding, transcript, exon, NMD
rs8101811	19	39087650	C	T	0.03412	-0.000397893	0.00222501	3343105	4	CAL	MAP4K1, CTB, 186G2.1	intron, variant, downstream, gene, non, coding, transcript, upstream
rs28362944	11	57365723	T	C	0.0340405	0.000387195	0.00217078	4268732	2	TRIG	SERPING1	splice, region, variant, 5, prime, UTR, intron, missense, upstream, gene, NMD, transcript
rs10251937	7	43622806	T	C	0.0338997	0.000364023	0.00205841	2750584	3	IGF1	STK17A, AC011738.1	5, prime, UTR, variant, intron, non, coding, transcript, downstream, gene
rs114623663	4	10515142	C	T	0.0338543	0.000391185	0.00219677	408964	10	URT	CLNK	synonymous, variant
rs76656494	4	77661017	A	C	0.0338315	0.000356242	0.00202014	444677	2	CREA	SHROOM3	missense, variant, intron, non, coding, transcript, downstream, gene, exon
rs74060020	1	21935358	C	T	0.0337179	0.000395904	0.00222562	305093	11	ALP	RAP1GAP	synonymous, variant, downstream, gene, NMD, transcript
rs12582	2	234749354	G	A	0.0337128	-0.000419809	0.00234107	185037	15	TBIL	HJURP	downstream, gene, variant, missense, NMD, transcript
rs1561140	16	56864398	T	C	0.0336964	0.000395385	0.00222711	299750	10	HDL	NUP93	intron, variant, upstream, gene, downstream
rs41310442	1	35250720	C	T	0.0335704	-0.000373678	0.00211462	4805707	2	HDL	GJB3, SMIM12, RP1, 34M23.5	synonymous, variant, intron, NMD, transcript, non, coding
rs1805124	3	38645420	T	C	0.0334976	0.000357807	0.00203599	1555526	2	GGT	SCN5A	missense, variant
rs78895434	18	54605919	A	C	0.0331409	0.000344046	0.00197471	1808289	2	GGT	WDR7	splice, donor, region, variant, intron, downstream, gene, NMD, transcript
rs56278008	10	61822784	G	C	0.0330894	-0.000349334	0.00200556	1469426	4	URT	ANK3, RP11, 388P9.2	intron, variant, downstream, gene, non, coding, transcript, exon, upstream
rs7847596	9	104032338	C	T	0.0330227	-0.000336562	0.00193894	3376070	6	HDL	LPPR1	synonymous, variant, non, coding, transcript, exon
rs151073349	19	13211821	C	T	0.0329879	0.000400136	0.00226579	1943851	5	APOB	TRMT1, LYL1, NFIX	downstream, gene, variant, synonymous, 5, prime, UTR
rs3736242	18	46474746	C	T	0.0329298	0.000354101	0.00203252	967197	4	HDL	SMAD7	splice, region, variant, intron
rs78927361	6	160847372	G	A	0.0328695	0.000340224	0.00196372	675788	2	SHBG	SLC22A3	intron, variant
rs28383572	1	159558150	G	A	0.0325807	-0.000393166	0.00224807	776669	8	CRP	APCS	synonymous, variant
rs34784622	18	59195229	C	T	0.0324781	0.000336101	0.00194993	2781021	2	ALT	CDH20	synonymous, variant
rs1053593	22	35660875	T	G	0.0323881	-0.000366968	0.0021115	1844891	2	HBA1C	HMGXB4	missense, variant, 3, prime, UTR, NMD, transcript, downstream, gene
rs35723429	7	44189692	C	G	0.032331	-0.000354757	0.00205791	182882	5	HBA1C	GCK	upstream, gene, variant, intron, downstream
rs7559956	2	72786528	A	C	0.0322062	-0.000337447	0.00196375	433829	2	CREA	EXOC6B	intron, variant, NMD, transcript
rs58132038	18	47563429	G	A	0.0321459	0.000373924	0.0021742	398332	5	APOA	MYO5B	intron, variant, downstream, gene
rs10138676	14	103412101	C	T	0.0320439	0.000341741	0.00198946	959241	4	GGT	CDC42BPB	intron, variant, upstream, gene
rs111854986	16	2301780	A	G	0.0317756	-0.000372691	0.00216138	1297467	5	IGF1	ECI1, RNPS1, AC009065.1	upstream, gene, variant, downstream, 5, prime, UTR
rs45532536	16	3282988	G	T	0.0316859	-0.000368382	0.0021386	316690	5	IGF1	ZNF200	intron, variant, downstream, gene, non, coding, transcript
rs1043302	18	57026436	C	T	0.0316096	-0.000326064	0.00191899	612228	2	GGT	LMAN1, RP11, 27G24.1	missense, variant, non, coding, transcript, exon, upstream, gene
rs17705646	17	37262117	C	T	0.0316035	-0.000367301	0.00215019	567703	3	CREA	PLXDC1, CTD, 2206N4.4	synonymous, variant, non, coding, transcript, exon, downstream, gene, NMD, intron, 3, prime, UTR
rs72657544	12	6457798	C	T	0.0314831	0.000337796	0.00198343	569346	2	PHOS	SCNN1A, RN7SL391P	intron, variant, NMD, transcript, downstream, gene, non, coding
rs12928542	16	4815501	G	C	0.0314658	-0.000357604	0.00208797	1215823	5	IGF1	ZNF500	intron, variant, downstream, gene, NMD, transcript
rs77231260	11	64540800	T	C	0.0314552	0.000379575	0.00221249	303823	7	URT	SF1	intron, variant, NMD, transcript, downstream, gene, non, coding, exon, upstream
rs568385611	6	15249076	G	C	0.0314438	0.000324463	0.00191469	876415	2	LDL	JARID2, AS1, RP11, 560J1.2	intron, variant, upstream, gene
rs2076724	3	125223456	C	T	0.0314402	-0.000347313	0.00203482	1920774	2	HBA1C	SNX4	intron, variant, NMD, transcript, non, coding
rs1891805	1	154904840	T	C	0.0313424	0.000364809	0.00213018	420945	5	GGT	PMVK	synonymous, variant
rs73219484	12	119962212	C	A	0.0312922	-0.000350251	0.00205398	1318504	3	ALP	CCDC60, RP11, 768F21.1	intron, variant, non, coding, transcript
rs10200936	2	29386646	G	C	0.0312324	-0.000337189	0.00198672	4340020	2	BMI	CLIP4	intron, variant, NMD, transcript, non, coding
rs4973588	2	233834975	G	A	0.0310947	0.000349849	0.00205805	729342	4	CAL	NGEF	missense, variant
rs2233667	17	47484228	G	C	0.0309052	0.000365802	0.00216964	158008	5	SHBG	PHB, RP11, 1079K10.4, 81K2.1	splice, polypyrimidine, tract, variant, intron, downstream, gene, non, coding, transcript, exon
rs522933	15	40259504	A	G	0.0308824	0.000327205	0.00194307	1844581	2	IGF1	EIF2AK4	intron, variant
rs2258227	12	121454257	A	T	0.0308475	0.000335909	0.00199034	3902918	6	HDL	OASL, C12orf43	downstream, gene, variant, synonymous, 5, prime, UTR, non, coding, transcript, exon, upstream
rs2277690	17	9783855	A	G	0.0308459	-0.000364351	0.00214153	1681589	3	HBA1C	GLP2R	intron, variant
rs78645354	10	119134707	G	A	0.0308326	-0.000323735	0.001926	2923487	4	HDL	PDZD8	missense, variant, upstream, gene
rs17127063	1	65312342	G	A	0.0308145	0.00032557	0.00193589	1916358	3	TRIG	JAK1	synonymous, variant, non, coding, transcript, exon
rs73552633	8	21550987	C	A	0.0305839	-0.000341945	0.00202845	1597788	3	HDL	GFRA2	intron, variant, NMD, transcript
rs2071334	16	15711142	A	G	0.0304631	0.000332672	0.00198296	530548	2	PHOS	KIAA0430, C16orf45	intron, variant, non, coding, transcript, downstream, gene, exon, NMD
rs2305562	1	22183739	G	A	0.0303845	-0.000358045	0.0021264	553474	11	ALP	HSPG2	intron, variant, upstream, gene
rs41274654	9	102595069	G	A	0.0302193	-0.000314789	0.00189391	1396329	2	ALP	NR4A3	synonymous, variant
rs33943110	6	24357796	G	A	0.0299616	0.000320862	0.00194751	346977	8	ALP	KAAG1, DCDC2	5, prime, UTR, variant, synonymous
rs61741188	4	96140151	C	T	0.0298762	-0.000294892	0.0017961	3868645	2	ALT	UNC5C	synonymous, variant
rs7497342	15	74948063	A	G	0.0298501	-0.000323552	0.00195065	1081606	2	URT	EDC3	intron, variant, downstream, gene, NMD, transcript
rs653347	2	20939708	C	T	0.029801	-0.000303799	0.00184734	529759	2	TRIG	C2orf43	intron, variant, downstream, gene, non, coding, transcript
rs346498	4	86851560	A	G	0.02979	-0.000296208	0.00180435	2004339	2	URT	ARHGAP24	5, prime, UTR, variant, intron, non, coding, transcript
rs10888382	1	150531008	C	T	0.0296981	-0.000333941	0.00201079	4408951	3	ALP	ADAMTSL4, AS1, RP11, 54A4.2	synonymous, variant, downstream, gene, upstream, non, coding, transcript, exon
rs76164683	2	27547247	G	C	0.0293236	0.000328104	0.00199266	1575696	5	IGF1	MPV17, GTF3C2	upstream, gene, variant, downstream, intron
rs2850991	4	102117323	A	G	0.029321	-0.000293381	0.00180114	2234038	3	CHO	PPP3CA	intron, variant, upstream, gene
rs61865239	10	95156021	G	A	0.0292374	-0.000318678	0.00194053	292136	2	TBIL	MYOF	intron, variant, downstream, gene
rs10776700	1	110300504	G	A	0.0291466	-0.000314084	0.0019178	839497	4	CHO	EPS8L3, GSTM5, RP4, 735C1.4	intron, variant, non, coding, transcript, downstream, gene
rs77817723	17	7945903	A	G	0.0290463	0.000354254	0.00214095	362209	15	SHBG	ALOX15B	intron, variant, non, coding, transcript, exon
rs10944129	6	86180926	G	A	0.0289558	0.000275328	0.00171277	985053	2	IGF1	NT5E	intron, variant, upstream, gene
rs1045655	4	99393671	G	C	0.0289262	0.000291766	0.00180203	489614	3	APOB	TSPAN5	3, prime, UTR, variant, NMD, transcript, non, coding, exon
rs569399655	14	103059316	C	T	0.0288443	-0.000298591	0.00184119	39206	3	APOA	RCOR1	synonymous, variant
rs7109567	11	117403017	A	G	0.0286862	-0.000312065	0.00191965	678423	8	HDL	DSCAML1	intron, variant
rs2230112	18	77171061	G	T	0.0285286	-0.000280507	0.00175242	2139839	2	CREA	NFATC1	synonymous, variant, intron, NMD, transcript
rs17184290	6	29523797	C	T	0.0285263	0.000290584	0.00180632	3656828	4	URT	GABBR1, UBD, OR2I1P	3, prime, UTR, variant, missense, downstream, gene
rs4699423	4	96256616	A	G	0.0285091	-0.000281748	0.00175748	3626669	2	IGF1	UNC5C	synonymous, variant
rs142525839	15	50399209	A	G	0.0284733	0.000294362	0.00182729	4763333	3	CREA	ATP8B4	splice, region, variant, polypyrimidine, tract, intron, NMD, transcript, non, coding
rs59454556	1	151089888	A	C	0.0284662	-0.000319768	0.0019676	3783987	7	CRP	GABPB2, RP11, 68I18.2	missense, variant, upstream, gene, intron, non, coding, transcript
rs41277827	9	109694584	T	C	0.0283189	-0.000282663	0.00176664	2286176	6	HDL	ZNF462	intron, variant, missense, upstream, gene, downstream, non, coding, transcript, exon
rs117074838	12	120222207	C	G	0.0282448	0.000310909	0.00192534	1058509	3	SHBG	CIT	intron, variant, non, coding, transcript, upstream, gene, downstream, exon
rs3088357	11	114121292	C	T	0.0282073	0.000303727	0.00188583	2603302	8	APOA	ZBTB16, RP11, 64D24.2	3, prime, UTR, variant, downstream, gene, intron, non, coding, transcript
rs240537	11	126213341	G	T	0.0281912	-0.000309868	0.00192425	163955	4	ALP	DCPS	intron, variant, non, coding, transcript
rs11593659	10	63174865	C	A	0.028158	-0.000283784	0.00177737	2821507	4	URT	TMEM26	intron, variant, downstream, gene, 3, prime, UTR, NMD, transcript, upstream
rs117829593	17	16593863	C	G	0.0281538	-0.000285974	0.00178937	1551530	2	CREA	CCDC144A, RP11, 219A15.1, RNU6, 405P	missense, variant, NMD, transcript, non, coding, exon, upstream, gene, intron
rs75933115	17	62125411	T	C	0.0280798	0.000294832	0.00184035	2935109	3	CREA	ERN1	intron, variant
rs7251988	19	35504627	C	A	0.0280635	0.000373648	0.00231078	239918	4	ALB	GRAMD1A, CTD, 2527I21.14	intron, variant, downstream, gene, non, coding, transcript, upstream, NMD
rs117919640	7	77394763	C	A	0.0280343	0.00027128	0.00171295	1049606	3	CREA	RSBN1L	intron, variant, upstream, gene
rs5878	1	173878832	T	C	0.0279501	-0.000286052	0.00179667	3132255	4	IGF1	SERPINC1	synonymous, variant, downstream, gene
rs11038628	11	5688940	C	T	0.0278668	0.00032939	0.00204062	2769	3	ALP	TRIM5	intron, variant, missense, splice, region, NMD, transcript, non, coding, exon
rs117372745	6	83861835	A	T	0.0276827	0.000260951	0.00166267	3304144	2	IGF1	DOPEY1	intron, variant, upstream, gene, non, coding, transcript
rs719430	17	74639530	C	T	0.0276635	0.000326911	0.00203148	1481306	6	HBA1C	ST6GALNAC1	intron, variant, NMD, transcript, non, coding
rs3745790	19	46997522	C	T	0.0275188	0.000342087	0.00212258	3104014	4	TPROT	AC011484.1, PNMAL2, PPP5D1	upstream, gene, variant, intron, non, coding, transcript, missense
rs1131471	1	152079989	T	G	0.0274875	0.000302004	0.0018994	1702968	3	VITD	TCHH	missense, variant
rs231300	8	113871304	C	T	0.0274748	-0.00026138	0.0016697	4081119	2	HBA1C	CSMD3	intron, variant
rs17823966	4	103189036	G	A	0.0273722	0.000272822	0.00173773	235925	2	APOA	SLC39A8	synonymous, variant, downstream, gene
rs9844212	3	123021870	C	G	0.0273529	0.000301036	0.0018981	280812	2	HBA1C	ADCY5	intron, variant, non, coding, transcript
rs11059924	12	129293346	C	T	0.0273371	0.00029459	0.00185882	3936171	5	APOA	SLC15A4	synonymous, variant, non, coding, transcript, exon, downstream, gene, 3, prime, UTR, NMD
rs72678225	8	121302022	G	A	0.0273086	0.000259586	0.00166362	3349599	2	HBA1C	COL14A1	intron, variant
rs1952494	14	25518326	C	T	0.0271735	-0.000302406	0.00190788	808755	2	SHBG	STXBP6	intron, variant, upstream, gene, NMD, transcript
rs181323802	12	104097109	T	A	0.0271218	0.000288065	0.00182797	3299238	4	PHOS	STAB2	intron, variant, NMD, transcript
rs2280997	1	26135741	C	G	0.0271186	-0.000298931	0.00188972	1150548	3	IGF1	SEPN1, RP1, 317E23.6	intron, variant, upstream, gene
rs2304773	2	234235820	C	T	0.0271101	0.000386619	0.00241286	292341	15	TBIL	SAG	synonymous, variant, non, coding, transcript, exon, 3, prime, UTR, NMD, downstream, gene, upstream
rs4577487	3	141903905	C	A	0.0270519	-0.000281895	0.00180574	92	3	URT	GK5	intron, variant, upstream, gene, downstream, 3, prime, UTR, NMD, transcript
rs2075165	1	156215899	A	G	0.0269226	0.000307523	0.00194329	3391699	5	CRP	PAQR6, PMF1, BGLAP, SMG5	intron, variant, downstream, gene, 5, prime, UTR, synonymous, non, coding, transcript, exon
rs2086005	18	44149474	G	A	0.0269081	0.000275655	0.00176354	3015623	2	CHO	LOXHD1	non, coding, transcript, exon, variant, synonymous
rs283411	4	100265957	C	A	0.0267619	-0.000265256	0.00170864	3159004	3	HDL	ADH1C	downstream, gene, variant, intron, non, coding, transcript
rs151192007	16	3283784	C	T	0.0267247	0.000305307	0.00193756	315894	5	IGF1	ZNF200	5, prime, UTR, variant, non, coding, transcript, exon, downstream, gene
rs1716979	3	41961168	T	C	0.0266102	0.000277281	0.00178215	4871274	2	GGT	ULK4	intron, variant, downstream, gene, upstream
rs7182648	15	57731573	C	T	0.026574	0.000292949	0.00189195	3795912	2	CREA	CGNL1	missense, variant, downstream, gene
rs17091919	14	95675669	G	T	0.0265444	0.000289618	0.00185277	887242	4	ALB	CLMN	intron, variant, downstream, gene, non, coding, transcript
rs1050054	19	44376681	G	T	0.0265365	0.000311522	0.0019794	3011894	5	ALP	ZNF404	3, prime, UTR, variant
rs11638130	15	75183935	A	G	0.0264608	-0.000283117	0.00181852	845734	2	URT	MPI	intron, variant, NMD, transcript, upstream, gene, non, coding, downstream
rs13184586	5	161119125	G	C	0.0264561	-0.000257379	0.00167164	4571879	3	CHO	GABRA6, RP11, 348M17.2	synonymous, variant, downstream, gene, non, coding, transcript, exon, upstream
rs545315231	12	118498996	G	A	0.0263556	0.000289316	0.00185654	2781720	3	ALP	WSB2, VSIG10	upstream, gene, variant, downstream, intron, non, coding, transcript
rs2242527	14	21993638	G	C	0.0263435	0.000292045	0.00187268	2715933	2	SHBG	SALL2, AE000658.22	missense, variant, downstream, gene
rs79146613	16	51176110	C	T	0.0263162	-0.000264868	0.00171871	99614	3	CRP	SALL1	intron, variant, downstream, gene
rs55888080	4	74274303	C	T	0.0262849	-0.000267473	0.00173315	2942037	2	CREA	ALB	splice, region, variant, polypyrimidine, tract, intron, NMD, transcript, upstream, gene, non, coding
rs150594	5	37333727	A	G	0.0262769	0.000267136	0.00173153	2162857	2	CREA	NUP155	synonymous, variant
rs678837	11	117109270	T	G	0.026225	0.00027994	0.00180657	546706	2	CHO	RNF214	intron, variant, non, coding, transcript
rs148737350	1	111962411	T	A	0.0261686	-0.000278264	0.00179812	822410	4	CHO	OVGP1	intron, variant, non, coding, transcript, upstream, gene
rs72825956	2	103121654	G	A	0.0259896	0.000264403	0.00172393	2379262	3	TPROT	SLC9A4	intron, variant, non, coding, transcript
rs8102988	19	34303416	G	A	0.025972	0.000289486	0.00186874	1441129	4	CAL	KCTD15	3, prime, UTR, variant, intron, downstream, gene, upstream
rs113336518	17	62125209	C	T	0.0259195	-0.000274625	0.00178464	92637	3	IGF1	ERN1	intron, variant
rs12922835	16	56403323	G	C	0.0259186	-0.000288295	0.00186214	475868	10	HDL	AMFR	intron, variant, upstream, gene, non, coding, transcript
rs61769519	1	85870024	C	T	0.0258963	0.000273681	0.00178217	3583714	3	GGT	DDAH1, RP11, 131L23.1	intron, variant, non, coding, transcript, downstream, gene
rs575756	19	56694505	C	T	0.0258874	-0.000313037	0.00200891	2256451	2	AST	GALP	splice, region, variant, synonymous, 3, prime, UTR, downstream, gene
rs2287692	19	41289756	G	A	0.0258725	-0.000304776	0.00196056	4120082	6	APOA	RAB4B, EGLN2, MIA	intron, variant, NMD, transcript, non, coding, upstream, gene
rs73207624	12	112674718	C	T	0.025791	-0.000272233	0.00177798	869995	2	URT	HECTD4	intron, variant
rs41279597	7	43921261	T	C	0.0257884	0.000267653	0.00174844	2452129	3	IGF1	URGCP, MRPS24	missense, variant, 3, prime, UTR, NMD, transcript, non, coding, exon
rs143243750	6	25917130	C	G	0.0257323	0.000261337	0.00171403	50161	4	HBA1C	SLC17A2	intron, variant
rs3813637	1	178491680	C	G	0.0257247	0.000260366	0.00170708	1480593	4	IGF1	TEX35	intron, variant, 3, prime, UTR, downstream, gene, NMD, transcript
rs201355421	8	81399152	C	T	0.0257179	-0.000229399	0.00152985	26074	2	SHBG	ZBTB10, Y, RNA	intron, variant, missense, upstream, gene
rs67984110	23	16887655	C	T	0.0256627	-0.000257415	0.00169156	2037550	2	HDL	RBBP7	missense, variant, intron
rs111428432	23	10469476	C	T	0.0256617	-0.000257349	0.00169117	4380629	2	HDL	MID1	intron, variant
rs147776329	19	45563695	G	A	0.0256009	0.000298215	0.0019317	4198908	5	ALP	CLASRP	synonymous, variant, NMD, transcript, 3, prime, UTR, downstream, gene
rs1065754	1	51873951	A	G	0.0255998	-0.000277891	0.00181174	3665478	4	CHO	EPS15	intron, variant, synonymous, upstream, gene, non, coding, transcript, exon
rs3136233	2	48011021	G	C	0.0255272	0.000266384	0.00174703	3965131	4	LDL	MSH6, RNU6, 688P	intron, variant, upstream, gene, NMD, transcript, non, coding, downstream
rs79308175	1	19775375	G	A	0.025516	0.000286221	0.00186175	1854890	11	ALP	CAPZB	intron, variant, missense, non, coding, transcript
rs76800623	1	156696188	C	T	0.0254137	0.000284074	0.00185359	4632168	8	TPROT	ISG20L2, RRNAD1	intron, variant, upstream, gene, downstream, non, coding, transcript
rs7104819	11	118769442	A	G	0.0253988	0.000271511	0.0017805	1963113	8	APOA	CXCR5, BCL9L	downstream, gene, variant, synonymous, non, coding, transcript, exon
rs12953179	17	7721196	T	C	0.0253641	-0.000327786	0.00213015	560036	15	SHBG	DNAH2	intron, variant
rs4269628	9	91190077	C	T	0.0253141	-0.000260186	0.00171729	481105	2	HBA1C	NXNL2	3, prime, UTR, variant, intron, non, coding, transcript
rs138236969	16	30536798	C	T	0.0251378	-0.000252907	0.00167934	2003623	3	IGF1	ZNF747, ITGAL, ZNF768	downstream, gene, variant, synonymous
rs184847124	19	47104779	A	C	0.0251312	0.000296455	0.00193587	1710107	3	ALT	CALM3, PPP5D1, AC011551.3	intron, variant, upstream, gene, non, coding, transcript
rs3730256	19	40761212	G	A	0.0250985	0.000297019	0.00194006	4633460	5	HDL	AKT2	intron, variant, splice, region, polypyrimidine, tract, NMD, transcript, upstream, gene, non, coding
rs114898634	3	167248873	C	T	0.0249245	0.00023996	0.00160879	4761423	3	IGF1	WDR49	intron, variant, downstream, gene
rs138673347	5	75700398	G	A	0.024867	0.000256282	0.00170591	3271465	3	AST	IQGAP2	intron, variant
rs17032441	1	114680540	C	T	0.0248523	0.000262614	0.0017436	3540539	4	CHO	SYT6	synonymous, variant, downstream, gene, 3, prime, UTR, NMD, transcript
rs11465206	1	155160556	A	G	0.0247643	-0.00027295	0.00180763	220597	3	ALP	TRIM46, MUC1, THBS3, RP11, 201K10.3, MIR92B	downstream, gene, variant, splice, polypyrimidine, tract, intron, non, coding, transcript, upstream
rs11934792	4	152097962	C	T	0.0247461	-0.000239869	0.00161387	3086831	2	ALP	SH3D19	splice, region, variant, intron, upstream, gene, non, coding, transcript
rs7016219	8	18729817	A	G	0.0247038	-0.00027204	0.00180332	1223382	4	TRIG	PSD3	missense, variant
rs34037914	16	1129501	C	T	0.0245569	0.000297849	0.00196976	2469746	5	IGF1	SSTR5, AS1	synonymous, variant, upstream, gene
rs174472	11	61671956	A	G	0.0245172	-0.000273971	0.00182477	37501	2	ALP	RAB3IL1	intron, variant, non, coding, transcript, downstream, gene, upstream
rs141343232	3	188956641	G	T	0.0244896	0.000262267	0.001752	2651617	2	CAL	TPRG1, AS2	missense, variant, non, coding, transcript, exon
rs217428	7	44555573	T	G	0.0244671	0.000254221	0.00170792	548763	5	HBA1C	NPC1L1, AC004938.5	splice, polypyrimidine, tract, variant, intron, upstream, gene
rs3733362	4	72412029	G	A	0.0243296	0.000250295	0.00168567	522159	6	VITD	SLC4A4	intron, variant
rs61778393	1	21902436	G	T	0.0242953	-0.000282148	0.00188356	272171	11	ALP	ALPL	intron, variant
rs2191157	12	4870363	G	A	0.0242924	-0.000260833	0.00175578	2138072	3	PHOS	GALNT8	intron, variant, upstream, gene
rs2291157	4	5721021	A	C	0.0242618	0.000256405	0.00172351	225457	4	SHBG	EVC	missense, variant
rs138374634	9	136135194	G	A	0.0242517	0.000287721	0.00191363	16518	7	ALP	ABO, RP11, 430N14.4	intron, variant, non, coding, transcript, upstream, gene
rs8040336	15	44053617	T	C	0.0242254	0.000245243	0.00165775	1582259	3	CREA	PDIA3	splice, region, variant, polypyrimidine, tract, intron, NMD, transcript, downstream, gene
rs2277712	18	46163049	C	T	0.024206	-0.000244473	0.0016538	1002048	2	CHO	CTIF	missense, variant, non, coding, transcript, exon
rs3762371	1	68620762	G	A	0.0239784	0.000247222	0.00167565	2400270	8	CRP	WLS, GNG12, AS1	intron, variant, non, coding, transcript, downstream, gene
rs11615225	12	120687812	C	T	0.0239512	-0.000260285	0.00175603	592904	3	ALP	PXN, RPS20P31	intron, variant, non, coding, transcript, 5, prime, UTR, downstream, gene, NMD, upstream
rs35919076	5	75967862	A	G	0.0239279	0.000248084	0.00168619	3538929	4	ALB	IQGAP2	intron, variant, upstream, gene, non, coding, transcript, downstream
rs149561889	4	10447155	A	T	0.0238374	-0.000273737	0.00184879	131262	10	URT	ZNF518B	missense, variant, downstream, gene
rs17030647	1	113238201	T	C	0.0238024	-0.000267185	0.00180771	9208	3	CREA	MOV10, RP11, 426L16.3	splice, donor, 5th, base, variant, intron, non, coding, transcript, upstream, gene, downstream
rs11038361	11	45248372	C	T	0.0237833	0.000219316	0.00151498	2166481	2	SBP	PRDM11, CTD, 2560E9.3	downstream, gene, variant, intron, non, coding, transcript
rs75121595	2	145780784	A	G	0.0237377	-0.00021911	0.00151459	2845057	3	CREA	TEX41	upstream, gene, variant, non, coding, transcript, exon, intron
rs3775782	4	70465153	A	T	0.0236718	-0.000241683	0.0016513	2469035	6	VITD	UGT2A1, UGT2A2	intron, variant, non, coding, transcript, exon
rs3814177	10	70332066	T	C	0.023669	-0.00026304	0.00178928	1499268	10	HBA1C	TET1	5, prime, UTR, variant
rs12252	11	320772	A	G	0.0235939	-0.000258739	0.00176078	2435586	4	ALP	IFITM3, RP11, 326C3.11, 326C3.10, 326C3.14, 326C3.13	synonymous, variant, downstream, gene, splice, region, 5, prime, UTR, upstream, intron, non, coding, transcript
rs141845046	1	154987704	C	T	0.0235902	0.000251963	0.00171689	1204747	3	VITD	ZBTB7B, DCST2	missense, variant, downstream, gene, non, coding, transcript, exon
rs45587133	18	47101654	C	T	0.0235446	0.000239145	0.00164021	340289	6	APOA	LIPG	intron, variant
rs2232228	16	69143577	A	G	0.0235432	0.000241691	0.00165532	2651936	2	LDL	HAS3	synonymous, variant, downstream, gene
rs2279232	5	32101168	T	A	0.0235304	0.000230615	0.00158895	2401450	2	SBP	PDZD2, CTD, 2152M20.2	intron, variant, non, coding, transcript, downstream, gene
rs11668974	19	44660791	G	A	0.0235196	0.000274579	0.0018562	749047	6	APOA	ZNF234	missense, variant
rs4805206	19	37642922	T	C	0.0234556	-0.000256891	0.00175245	1898377	3	SHBG	ZNF585A, CTC, 454I21.3	missense, variant, intron, NMD, transcript, non, coding, downstream, gene
rs4796851	17	79912103	T	C	0.0234547	-0.000257703	0.00175483	1344388	6	HBA1C	NOTUM	intron, variant, downstream, gene
rs12364019	11	5730343	G	A	0.023382	-0.00025308	0.0017291	1096029	2	IGF1	TRIM22, TRIM5	missense, variant, intron, 3, prime, UTR, NMD, transcript, non, coding, exon
rs76336942	22	21989008	C	G	0.0232897	0.000255288	0.0017431	3102372	14	GGT	YDJC, CCDC116	upstream, gene, variant, missense, downstream
rs3211371	19	41522715	C	T	0.0232767	0.000272593	0.00185417	157928	5	ALP	CYP2B6	missense, variant, non, coding, transcript, exon
rs17601580	6	132061420	G	A	0.0231352	-0.000244055	0.00168594	245615	3	PHOS	ENPP3	missense, variant, 3, prime, UTR
rs74349222	2	18745466	C	T	0.0231096	0.000225428	0.00156801	2724001	4	CHO	NT5C1B, RDH14	intron, variant, upstream, gene, NMD, transcript
rs188291420	6	132129141	G	T	0.0230617	0.000229886	0.00159743	4626288	3	URA	ENPP1	upstream, gene, variant
rs6032262	20	44144272	G	T	0.023051	0.00024313	0.00167897	320330	5	HDL	SPINT3	upstream, gene, variant
rs3749117	2	160885442	C	T	0.023033	0.000234329	0.00162483	4660524	3	HDL	PLA2R1	missense, variant
rs12659540	5	158522577	C	A	0.0229749	-0.000221798	0.0015497	1975331	3	CHO	EBF1, RP11, 175K6.1	intron, variant, upstream, gene, non, coding, transcript
rs78085836	10	96039710	T	C	0.0229359	-0.000241373	0.00167288	2447	2	DBP	PLCE1, AS1	intron, variant, non, coding, transcript, exon, downstream, gene
rs61752597	11	6007294	A	G	0.0228373	-0.000246568	0.00170548	1372980	2	IGF1	OR52L1	synonymous, variant
rs35487764	4	152637228	C	T	0.0228372	0.000217967	0.00153	3626097	2	ALP	PET112	synonymous, variant, 3, prime, UTR, NMD, transcript, non, coding, exon, intron
rs35094336	8	82670771	G	A	0.0227675	0.000198695	0.00141468	1245545	2	SHBG	CHMP4C	missense, variant
rs9549532	13	113153114	C	T	0.0227238	0.000229856	0.00160574	839625	2	LDL	TUBGCP3	intron, variant, downstream, gene
rs144611775	4	152059111	T	C	0.0226519	-0.000216018	0.00152284	3047980	2	ALP	SH3D19, RP11, 372K14.2	intron, variant, non, coding, transcript, upstream, gene
rs13031859	2	26741961	G	A	0.0225383	0.000234608	0.00164152	2328167	3	HBA1C	OTOF	missense, variant
rs112570954	2	234716027	T	A	0.0224915	0.000266266	0.00183107	196410	15	TBIL	MROH2A	intron, variant, downstream, gene
rs77707502	2	25608947	G	A	0.0224648	0.000218392	0.00154193	4139480	4	CHO	DTNB	intron, variant, NMD, transcript, downstream, gene, non, coding, exon
rs788337	19	50779988	A	T	0.0224511	-0.0002652	0.00183425	2354122	2	VITD	MYH14	intron, variant
rs78173884	1	157800640	T	C	0.0224453	-0.000249811	0.00173667	1877401	5	CRP	CD5L	downstream, gene, variant
rs5560	16	55735795	G	A	0.0223688	-0.000241093	0.00168559	1226114	3	LDL	SLC6A2	synonymous, variant, intron, missense
rs2242079	2	173883549	A	G	0.0223457	0.000229287	0.00161271	3794509	4	ALP	RAPGEF4	intron, variant
rs144684289	19	34991194	T	A	0.0223382	-0.00024291	0.00169818	753351	3	TPROT	WTIP	3, prime, UTR, variant, downstream, gene
rs538089	1	156105028	T	C	0.0221838	-0.000240225	0.00168591	1165069	4	SHBG	LMNA	synonymous, variant, non, coding, transcript, exon, upstream, gene, downstream
rs72825880	2	96943433	G	C	0.0220364	0.0002093	0.00149747	2070915	2	CAL	CIAO1, SNRNP200	downstream, gene, variant, synonymous, intron, NMD, transcript, non, coding, exon
rs41281949	10	50531137	A	T	0.0220001	-0.00021171	0.001513	2975882	2	CREA	C10orf71	missense, variant
rs1801334	6	161781225	C	T	0.0219276	-0.000213887	0.0015282	258065	7	APOB	PARK2	missense, variant, intron, NMD, transcript
rs2017461	22	44285765	A	G	0.0217886	-0.000237697	0.00168239	21271	5	AST	PNPLA5	intron, variant
rs61751126	15	75688688	T	C	0.0217319	-0.000224934	0.00160316	1728137	3	GGT	SIN3A	synonymous, variant
rs2304234	19	41748753	T	C	0.0216983	0.000254799	0.00179404	3661085	4	TRIG	AXL	intron, variant, non, coding, transcript
rs153602	5	52404312	C	T	0.0216777	-0.000197514	0.00143324	832263	2	GGT	MOCS2, CTD, 2366F13.1	intron, variant, upstream, gene, non, coding, transcript
rs149553751	17	38122099	C	T	0.0216331	-0.000231834	0.00165047	4056868	3	APOA	GSDMA	synonymous, variant
rs147428832	15	65256045	G	A	0.0215572	0.000222748	0.00159445	4349457	2	GGT	SPG21	synonymous, variant, 3, prime, UTR, NMD, transcript
rs61730641	4	87730980	C	T	0.0215427	0.000211096	0.0015221	241350	2	SHBG	PTPN13	missense, variant
rs2289671	17	42988959	T	C	0.0213623	-0.000234787	0.00167833	809992	4	HDL	GFAP	intron, variant, NMD, transcript, upstream, gene, downstream, non, coding
rs79964989	11	59807978	G	A	0.0213536	0.000231946	0.00166004	2405432	4	GGT	OOSP2	missense, variant, non, coding, transcript, exon, 5, prime, UTR
rs2247528	10	116307504	G	A	0.0213448	0.000207624	0.0015047	2399028	3	APOA	ABLIM1	synonymous, variant, NMD, transcript, non, coding, exon
rs2304203	19	50248695	A	G	0.021333	0.00025553	0.00181198	147159	3	ALB	TSKS	intron, variant
rs777508	3	126180047	G	C	0.0213321	-0.00022362	0.00160638	3409845	5	CAL	ZXDC	3, prime, UTR, variant, intron, NMD, transcript
rs143577579	18	47501072	G	A	0.0212861	-0.000211338	0.00152985	335975	2	CHO	MYO5B, RP11, 813F20.4	intron, variant, upstream, gene
rs72842201	17	60813271	A	G	0.0212272	-0.000216225	0.00156255	2856757	2	TPROT	MARCH10, RP11, 156L14.1	intron, variant, non, coding, transcript, exon
rs12132844	1	23765807	C	G	0.0211853	0.00022734	0.00163568	3520482	3	IGF1	ASAP3	intron, variant, NMD, transcript, downstream, gene, upstream
rs7975348	12	101701930	T	C	0.0211797	-0.000219661	0.00158731	1458448	5	IGF1	UTP20	intron, variant
rs7958316	12	121605373	G	A	0.0211734	-0.000217367	0.00157135	1174010	5	APOA	P2RX7	3, prime, UTR, variant, NMD, transcript, missense, intron, non, coding, exon, downstream, gene
rs11206617	1	40149551	G	C	0.0211292	-0.000231079	0.00166439	93124	3	SHBG	HPCAL4	intron, variant
rs35717325	18	44773068	G	A	0.021092	0.00021036	0.00152866	2668875	6	APOA	SKOR2	intron, variant, synonymous
rs61734402	18	43523997	T	C	0.0210567	0.000209946	0.001527	3917946	6	APOA	EPG5	missense, variant, non, coding, transcript, exon
rs79383126	19	55497462	T	C	0.0210565	-0.00025338	0.0018078	1042652	3	APOA	NLRP2	intron, variant, upstream, gene, downstream, non, coding, transcript
rs10897289	11	62400016	T	C	0.0210356	0.000234104	0.00168332	1836961	7	URT	GANAB	intron, variant, downstream, gene, NMD, transcript
rs223332	4	103790186	G	T	0.0209559	0.000203837	0.00149103	3967629	3	ALP	CISD2, UBE2D3	5, prime, UTR, variant, upstream, gene
rs13149784	4	72306560	A	T	0.0209246	0.000209859	0.00152976	627628	6	VITD	SLC4A4, LDHAL6EP	intron, variant, non, coding, transcript, upstream, gene
rs12652195	5	72874801	G	A	0.020856	0.000209839	0.00153361	445868	3	AST	UTP15	intron, variant, downstream, gene
rs2960548	3	49720393	G	C	0.020843	-0.000210289	0.00153781	28456	3	HBA1C	APEH, MST1, AC099668.5	intron, variant, downstream, gene, non, coding, transcript
rs1409174	13	94938785	G	A	0.0208378	0.00019922	0.00146477	1216288	2	ALP	GPC6	intron, variant
rs5891	12	125299542	C	T	0.0208243	-0.000220686	0.00160413	57633	6	HDL	SCARB1	missense, variant, intron, non, coding, transcript, exon
rs217478	1	63991267	T	C	0.0207938	-0.00020625	0.00151103	595283	2	APOB	ITGB3BP, EFCAB7, RN7SL488P	upstream, gene, variant, synonymous, intron, non, coding, transcript, exon, downstream
rs79109396	10	115402680	G	T	0.0207758	-0.00020137	0.00148017	1494204	3	HDL	NRAP	intron, variant
rs35099105	8	80976814	C	A	0.0207497	-0.00018991	0.00140755	4523787	3	URT	TPD52	missense, variant, NMD, transcript, upstream, gene, non, coding, exon, 5, prime, UTR, intron, downstream
rs13306520	1	66081664	A	G	0.0207042	0.000205008	0.00150546	2685680	2	CHO	LEPR	intron, variant, upstream, gene
rs12067507	1	57422511	C	T	0.0206904	0.00021693	0.00158254	1883674	5	APOB	C8B	missense, variant, downstream, gene
rs12044172	1	15256546	T	C	0.0206717	0.000226453	0.0016453	1446348	3	GGT	KAZN	intron, variant, splice, donor, region, non, coding, transcript
rs4238272	13	111077197	A	G	0.0205861	-0.00020547	0.00151184	1236292	2	CHO	COL4A2	synonymous, variant
rs3750447	9	111956599	G	A	0.0205704	-0.000197389	0.00146012	4278426	5	CHO	RNU6, 984P, EPB41L4B	downstream, gene, variant, synonymous
rs569693	6	10586006	A	C	0.0205674	0.000208675	0.00153311	3211210	3	URT	GCNT2	5, prime, UTR, variant, intron, non, coding, transcript
rs117610843	19	35260442	C	T	0.0205425	0.000220695	0.00161207	484103	3	SHBG	ZNF599	missense, variant, non, coding, transcript, exon
rs36045790	2	27308159	G	A	0.020526	-0.000218401	0.00160202	1336608	5	IGF1	KHK, EMILIN1	upstream, gene, variant, missense
rs41279246	20	41077028	G	A	0.020475	0.000212292	0.00155938	2746914	2	SHBG	PTPRT	intron, variant
rs2243385	6	117663499	A	G	0.0204724	-0.000188267	0.00140451	2159627	3	CHO	ROS1, GOPC	intron, variant, upstream, gene, non, coding, transcript
rs10493008	1	22013771	G	A	0.0204602	0.000243588	0.00177475	52263	8	PHOS	USP48	intron, variant, non, coding, transcript
rs12933548	16	29790709	C	T	0.0204067	0.0002013	0.00149233	1257534	3	IGF1	ZG16, AC009133.21	intron, variant, upstream, gene
rs12596169	16	58615223	T	C	0.0203982	-0.000214255	0.00157497	730868	3	AST	CNOT1	intron, variant, NMD, transcript
rs3743405	15	91168976	T	C	0.0203933	0.000211508	0.00155722	356636	3	SBP	CRTC3, RP11, 387D10.2	intron, variant, non, coding, transcript
rs2038977	1	42094659	C	T	0.0203925	0.000216351	0.0015884	2038232	3	SHBG	HIVEP3	intron, variant
rs11801984	1	160147517	A	G	0.0203656	-0.000222401	0.00162893	4821732	2	URA	ATP1A4	intron, variant, non, coding, transcript, NMD
rs148457808	11	67397290	C	T	0.0202666	0.000226956	0.00166456	1997024	7	URT	NUDT8, TBX10, RP11, 655M14.13	synonymous, variant, downstream, gene, upstream, non, coding, transcript, exon
rs583791	11	59947252	T	C	0.020256	0.000217529	0.00160052	1687203	2	TRIG	MS4A6A	intron, variant, non, coding, transcript, exon, downstream, gene, NMD, upstream, missense
rs9692459	7	77394988	T	A	0.0202526	0.000188645	0.0014141	1049381	3	CREA	RSBN1L	intron, variant, upstream, gene, non, coding, transcript
rs10412098	19	38905683	A	G	0.0201284	0.000222899	0.00164252	3161138	4	CAL	RASGRP4	synonymous, variant, intron, upstream, gene, non, coding, transcript, exon, NMD
rs112288749	2	216211604	A	G	0.0201199	-0.000197262	0.00147171	4780238	2	URA	ATIC	synonymous, variant, upstream, gene, 3, prime, UTR, NMD, transcript, downstream, non, coding, exon
rs117886003	17	71411901	T	C	0.0200987	0.000229293	0.00168339	4812933	2	APOA	SDK2	intron, variant, upstream, gene, non, coding, transcript
rs6537301	4	145579907	G	A	0.0200405	0.000187303	0.00140903	3431224	2	ALP	HHIP, AS1	intron, variant, non, coding, transcript
rs79688041	11	65043321	G	A	0.0199894	0.000226894	0.0016755	806344	7	URT	POLA2	intron, variant, upstream, gene, NMD, transcript, non, coding
rs41285250	6	125613969	C	T	0.0199693	-0.00019443	0.0014574	1888884	3	URA	HDDC2	intron, variant, NMD, transcript, downstream, gene, non, coding
rs2293158	17	40447558	T	C	0.0198759	-0.000213463	0.00158655	1731409	3	TRIG	STAT5A	intron, variant, downstream, gene
rs1052179	10	71267010	G	A	0.0198572	0.000215494	0.00160482	432184	10	HBA1C	TSPAN15	3, prime, UTR, variant, intron, downstream, gene
rs2233465	3	183961834	A	G	0.0198519	-0.000212388	0.00158475	2043011	3	BMI	VWA5B2, ALG3, MIR1224, EIF2B5	downstream, gene, variant, intron, NMD, transcript, non, coding, upstream
rs34069734	16	4718388	G	A	0.0198118	-0.000219212	0.00162601	1118710	5	IGF1	MGRN1	intron, variant, NMD, transcript, non, coding, upstream, gene
rs4074	4	74736144	G	A	0.0197658	0.000197371	0.00148273	425589	2	ALB	CXCL1	intron, variant, downstream, gene
rs2304423	2	20845273	A	G	0.0197292	0.00019305	0.00145605	624194	5	APOA	HS1BP3	splice, region, variant, polypyrimidine, tract, intron, NMD, transcript
rs2133198	1	109170746	T	C	0.0197194	-0.00019693	0.00148099	1208320	2	SHBG	FAM102B	intron, variant, non, coding, transcript, exon
rs41267137	6	159183283	G	A	0.0194592	0.00018885	0.0014348	2339877	7	APOB	SYTL3, EZR, MIR3918	intron, variant, downstream, gene
rs4934	14	95080803	G	A	0.0193888	0.000207072	0.00156058	292376	4	ALB	SERPINA3, RP11, 986E7.7	missense, variant, upstream, gene, downstream, 3, prime, UTR, NMD, transcript, intron, non, coding
rs13130999	4	88761259	A	G	0.0193865	0.000180956	0.00138414	94640	2	URT	MEPE	intron, variant, non, coding, transcript
rs34169848	11	60197299	G	A	0.0193704	0.00020673	0.00155704	1437156	2	TPROT	MS4A5	missense, variant, splice, region, NMD, transcript, non, coding, exon
rs117260922	11	121367627	G	A	0.0193329	-0.000199338	0.00150836	4681759	4	ALP	SORL1	missense, variant, non, coding, transcript, exon
rs116540274	1	68897125	C	T	0.0193135	0.000195608	0.00148345	2676633	8	CRP	RPE65	intron, variant
rs28750133	4	71639349	G	A	0.0193082	0.000192042	0.00146051	2671206	2	ALB	RUFY3	intron, variant
rs114705696	4	70079951	G	C	0.0192658	0.000188113	0.00143853	264227	3	GGT	UGT2B11, RP11, 704M14.1, 704M14.2	missense, variant, intron, non, coding, transcript, downstream, gene
rs75678869	17	7793162	C	T	0.0191744	0.000228447	0.0017114	506935	15	SHBG	CHD3, LSMD1	intron, variant, upstream, gene, non, coding, transcript
rs880082	10	114889261	T	A	0.0191364	-0.000183253	0.00140673	980785	3	HDL	TCF7L2	intron, variant
rs6777340	3	52188308	T	C	0.0191346	-0.000189775	0.00145164	2439459	3	HBA1C	POC1A	intron, variant
rs1534967	20	36841756	T	C	0.0191111	-0.000192226	0.00146763	3094348	2	CREA	KIAA1755	synonymous, variant, downstream, gene, non, coding, transcript, exon
rs61757225	10	101639682	G	A	0.0190622	0.000211747	0.00160783	299233	3	ALT	DNMBP	synonymous, variant
rs148271967	8	82670316	T	C	0.0190575	-0.000160913	0.00126082	1245090	2	SHBG	CHMP4C	intron, variant
rs2291678	17	62228161	T	C	0.0190499	0.000193804	0.00148005	1591061	3	SHBG	TEX2, SNORD104, SNORA76	intron, variant, downstream, gene, non, coding, transcript, exon
rs13407286	2	166152222	A	G	0.0190101	0.000188288	0.00144418	606256	3	HDL	SCN2A	intron, variant, upstream, gene, non, coding, transcript
rs12713870	2	21239595	A	G	0.0189955	0.000182239	0.0014064	229872	4	CHO	APOB	intron, variant
rs41269807	1	14107360	T	A	0.0189359	-0.000205906	0.00156575	2316472	2	ALT	PRDM2	missense, variant, intron, downstream, gene, NMD, transcript
rs117238419	15	74574218	G	A	0.0188871	0.000192634	0.00147727	1455451	2	CREA	CCDC33	intron, variant
rs1047640	2	174820750	T	C	0.0188025	-0.000192693	0.00148008	4731710	4	ALP	SP3	missense, variant, non, coding, transcript, exon, downstream, gene
rs78825186	11	74883559	G	A	0.0187863	-0.000193499	0.00148586	3721927	3	VITD	SLCO2B1	missense, variant, non, coding, transcript, exon, downstream, gene
rs17115061	10	104572881	T	C	0.0187726	-0.000195153	0.00149771	2633966	3	AST	WBP1L	synonymous, variant
rs147173331	15	57910241	T	C	0.0187494	0.000190204	0.00146484	2996347	2	GGT	MYZAP, GCOM1, POLR2M	missense, variant, 5, prime, UTR, NMD, transcript
rs114932951	4	72631184	C	T	0.0187447	0.000190239	0.00146682	303004	6	VITD	GC	synonymous, variant, non, coding, transcript, exon, downstream, gene, NMD
rs62509309	8	74890961	A	G	0.0187349	-0.000170447	0.00133182	1562066	3	URT	TMEM70, Y, RNA, RPS20P21	intron, variant, downstream, gene, NMD, transcript, upstream, non, coding
rs35001694	1	155257818	C	T	0.0187333	-0.000217013	0.0016576	67967	3	URT	PKLR, HCN3	downstream, gene, variant, missense, upstream, non, coding, transcript, exon
rs2287073	16	55513331	G	C	0.0187203	0.000178491	0.0013863	4237607	3	CRP	MMP2	5, prime, UTR, variant, upstream, gene, intron
rs2280574	12	122492978	T	C	0.0186831	0.000197344	0.00151532	1194495	4	GGT	BCL7A	intron, variant
rs144871159	12	122260947	G	A	0.018636	-0.000192196	0.00148199	3096228	6	HDL	SETD1B	missense, variant
rs142744254	16	88766205	C	T	0.0186254	0.000201565	0.00154725	1720775	4	HBA1C	RNF166, RP5, 1142A6.5	intron, variant, downstream, gene, upstream, 5, prime, UTR
rs41274674	10	61832626	G	A	0.0185357	0.000179197	0.00139708	1479268	4	URT	ANK3	synonymous, variant, intron
rs2526380	17	56398006	C	G	0.0184759	-0.000184797	0.00143638	1558508	2	TPROT	BZRAP1, AS1	intron, variant, upstream, gene, downstream
rs12443199	15	71184902	G	A	0.0184502	0.000187444	0.00145516	4844767	2	CREA	THAP10, LRRC49	5, prime, UTR, variant, upstream, gene, intron, non, coding, transcript, NMD
rs143691300	3	58625813	G	A	0.0184336	0.00018001	0.00140515	151211	4	AST	FAM3D	intron, variant, NMD, transcript, downstream, gene
rs4477295	1	161254280	G	C	0.0183748	0.000202757	0.00156542	119236	8	TPROT	PCP4L1	3, prime, UTR, variant
rs1801280	8	18257854	T	C	0.0183694	0.000193071	0.00149606	1695345	3	APOA	NAT2	missense, variant, 5, prime, UTR
rs79706622	2	190611188	G	T	0.0183592	0.000164444	0.00130122	1618909	2	GGT	OSGEPL1, ANKAR	downstream, gene, variant, 3, prime, UTR, missense, NMD, transcript, intron, non, coding, exon
rs2025256	14	24543873	A	G	0.0183053	-0.000195234	0.00151373	165698	3	ALP	CPNE6, LRRC16B	intron, variant, downstream, gene, non, coding, transcript, exon, upstream, NMD
rs7186799	16	57220016	A	C	0.0182682	0.000191302	0.00148675	55868	5	APOA	FAM192A, RSPRY1	upstream, gene, variant, 5, prime, UTR
rs1056041	19	33697546	C	T	0.0182262	-0.000193032	0.00150082	2046999	3	SHBG	SLC7A10, LRP3, CTD, 2540B15.13	downstream, gene, variant, synonymous, non, coding, transcript, exon, upstream
rs8017	16	2821573	T	C	0.0181824	-0.000199805	0.00154975	778105	5	IGF1	TCEB2, SRRM2, AC092117.2	missense, variant, downstream, gene, 3, prime, UTR, non, coding, transcript, exon
rs61732642	19	53762563	G	C	0.0181532	-0.000212037	0.00163584	692247	3	APOA	ZNF677, VN1R2	upstream, gene, variant, missense, non, coding, transcript, exon
rs11722955	4	95506827	G	A	0.0181524	-0.00017291	0.00136434	4315730	3	ALP	PDLIM5	synonymous, variant, non, coding, transcript, exon, NMD, downstream, gene, 3, prime, UTR
rs61748115	12	120741382	G	A	0.0181494	0.000204796	0.00160126	557101	5	CRP	SIRT4	synonymous, variant, splice, polypyrimidine, tract, intron, upstream, gene
rs7609991	3	58555386	G	T	0.0181424	0.000183813	0.00144697	80784	4	AST	FAM107A, RP11, 475O23.2	intron, variant, upstream, gene
rs78192833	17	57752259	A	G	0.0180498	0.000178978	0.00140913	1438043	2	PHOS	CLTC, PTRH2	intron, variant, non, coding, transcript
rs653764	11	117948080	C	T	0.0180469	-0.000183603	0.00144121	1385516	2	CHO	TMPRSS4, AS1	intron, variant, NMD, transcript, non, coding
rs835435	1	59844471	G	A	0.0180391	0.000179389	0.00141204	3551513	3	TRIG	FGGY	synonymous, variant, NMD, transcript, non, coding, exon
rs73202455	12	110207172	G	T	0.0179882	0.000183529	0.0014449	1597551	4	HDL	FAM222A, AS1	3, prime, UTR, variant, intron, non, coding, transcript
rs12610545	19	51984727	A	G	0.017965	-0.000210163	0.00162977	2788679	3	URA	CEACAM18	missense, variant
rs145966524	2	234356244	C	T	0.017954	-0.000207366	0.00160368	208073	15	TBIL	DGKD	intron, variant, NMD, transcript, upstream, gene, non, coding
rs5750822	22	39826788	A	G	0.0179425	-0.000191161	0.00149719	4437706	5	AST	TAB1	3, prime, UTR, variant, intron, downstream, gene, upstream
rs7311687	12	109016803	C	A	0.0179334	-0.000180307	0.00142192	2787920	3	CHO	SELPLG	3, prime, UTR, variant
rs16955477	17	6023792	C	T	0.0178069	0.000200229	0.00156554	1109679	4	ALP	WSCD1	synonymous, variant, 3, prime, UTR, NMD, transcript
rs1772626	1	64515379	T	C	0.0177738	0.000176409	0.00139942	1119395	3	TRIG	ROR1	synonymous, variant, non, coding, transcript, exon
rs74634459	18	43677748	T	G	0.0177643	-0.000171794	0.00136782	3487349	2	CHO	ATP5A1	intron, variant, NMD, transcript, non, coding
rs74818906	11	66083043	C	T	0.0177289	0.000190923	0.00150459	4448588	3	HDL	CD248, RP11, 867G23.13	missense, variant, intron, non, coding, transcript
rs9409099	9	112642740	G	A	0.0176967	0.000165601	0.00132641	4964567	6	HDL	PALM2, AKAP2	intron, variant, non, coding, transcript
rs41381744	19	43026435	A	G	0.0176871	0.000200378	0.00157083	2383403	4	TRIG	CEACAM1, LIPE, AS1	intron, variant, non, coding, transcript, downstream, gene, upstream
rs12458286	18	48331457	G	A	0.0176371	-0.000171252	0.00136772	889514	6	APOA	MRO	intron, variant, NMD, transcript, non, coding
rs3795948	2	23926659	T	C	0.0175251	0.000166583	0.0013394	2457192	4	LDL	KLHL29	non, coding, transcript, exon, variant, synonymous
rs79385421	17	7224433	C	T	0.0174995	-0.000198002	0.00156202	877833	3	HBA1C	RP11, 542C16.2, NEURL4	upstream, gene, variant, missense, splice, region, downstream, NMD, transcript
rs61752473	1	112308782	C	G	0.0174381	0.000183893	0.00146288	920211	3	CREA	KCND3, DDX20	downstream, gene, variant, missense
rs116593167	5	72182815	G	A	0.0174295	-0.000173771	0.00139438	246118	4	ALB	TNPO1	intron, variant, downstream, gene, non, coding, transcript
rs11677413	2	192818602	T	C	0.0174279	0.000154675	0.00125834	588505	2	GGT	TMEFF2, AC098617.1	intron, variant, non, coding, transcript
rs112594620	10	98742043	A	G	0.0174093	0.000174882	0.00140018	2699886	2	DBP	C10orf12, LCOR	missense, variant, downstream, gene
rs116506340	2	169571519	C	T	0.0174017	-0.000178802	0.00143199	219250	4	HBA1C	CERS6	synonymous, variant
rs6001402	22	39448711	A	C	0.0173583	0.00018322	0.00146094	324622	2	GGT	APOBEC3F, APOBEC3G	3, prime, UTR, variant, intron, downstream, gene
rs11552770	15	74001993	T	C	0.0173504	-0.000176035	0.00141083	2027676	2	URT	CD276	synonymous, variant, downstream, gene, NMD, transcript, upstream, non, coding, exon, 3, prime, UTR
rs41289428	1	62579758	G	A	0.0173324	0.000170301	0.00137029	816226	3	APOA	INADL	missense, variant, non, coding, transcript, exon, upstream, gene, NMD
rs7611635	3	124844848	A	G	0.017329	0.000177317	0.0014197	2074646	5	CAL	SLC12A8	intron, variant, upstream, gene, NMD, transcript, non, coding
rs151309657	9	116123039	G	C	0.0172675	-0.000175959	0.00141243	985814	2	AST	BSPRY	intron, variant, non, coding, transcript
rs182885648	11	67432050	C	T	0.0172414	-0.000175605	0.00141037	3729582	3	VITD	ALDH3B2	splice, polypyrimidine, tract, variant, intron, downstream, gene, non, coding, transcript
rs2472530	11	5153261	A	G	0.0172115	-0.000178513	0.00143216	2396903	4	ALP	OR52A5	synonymous, variant
rs185356090	19	41223203	G	C	0.0171785	-0.000185829	0.00148552	2397317	4	CAL	ADCK4, ITPKC	upstream, gene, variant, missense, intron
rs370950963	3	138664707	A	C	0.0171514	0.000163297	0.00132624	2737994	3	TBIL	FOXL2, C3orf72, RP11, 548O1.3	synonymous, variant, upstream, gene
rs55646187	14	24564123	G	A	0.0171305	-0.000180857	0.0014519	145448	2	SHBG	PCK2, NRL	intron, variant, non, coding, transcript, upstream, gene, NMD
rs148524502	12	120636963	C	T	0.0171114	0.000172914	0.00139562	4720212	6	HDL	RPLP0, GCN1L1, PXN, AS1	synonymous, variant, upstream, gene, non, coding, transcript, exon, NMD, 3, prime, UTR, downstream
rs35277048	2	26987811	G	A	0.0171097	-0.000171545	0.00138652	2574017	3	HBA1C	SLC35F6, CENPA	intron, variant, NMD, transcript, non, coding
rs2070507	22	22277571	A	C	0.017083	-0.000180559	0.00144906	2813809	14	GGT	PPM1F	missense, variant, downstream, gene, non, coding, transcript, exon
rs146984380	5	74981153	G	A	0.0170801	-0.000165724	0.00134547	2552220	3	AST	POC5	missense, variant, non, coding, transcript, exon
rs6046790	20	20303376	G	A	0.0169941	-0.000167213	0.00135903	704113	3	IGF1	C20orf26	intron, variant, NMD, transcript, non, coding, exon
rs178640	14	23855569	A	G	0.0169801	-0.000178848	0.0014424	854002	2	SHBG	MYH6, MIR208A	synonymous, variant, downstream, gene
rs4712056	6	53989526	A	G	0.0169177	-0.000166858	0.00135913	3179594	3	BMI	MLIP	missense, variant, downstream, gene, non, coding, transcript, exon
rs11154131	6	123319382	C	T	0.0169078	0.000160645	0.00131458	4183471	3	URA	CLVS2	intron, variant
rs35571096	8	71550144	A	G	0.0168872	0.000152259	0.00125569	4902883	3	URT	LACTB2, RP11, 382J12.1	splice, region, variant, polypyrimidine, tract, intron, downstream, gene, non, coding, transcript
rs3087368	7	44154492	C	T	0.0168737	-0.000165763	0.0013537	147682	5	HBA1C	AEBP1, POLD2, MIR4649	downstream, gene, variant, synonymous, non, coding, transcript, exon
rs1050916	7	43830880	A	G	0.0168714	0.000165092	0.00134768	2542510	3	IGF1	BLVRA	missense, variant, non, coding, transcript, exon
rs201772357	16	72821625	C	T	0.0168477	-0.000165135	0.00134847	1026112	2	CHO	ZFHX3, RP5, 991G20.1, 991G20.4, AC004943.1	missense, variant, downstream, gene, upstream, mature, miRNA
rs56097748	4	72629669	T	C	0.0168255	-0.000167688	0.00137129	304519	6	VITD	GC, RNA5SP163	splice, polypyrimidine, tract, variant, intron, upstream, gene, non, coding, transcript, downstream, NMD
rs61753924	19	35633635	C	T	0.0167258	-0.000176202	0.00143246	110910	3	TPROT	FXYD7, FXYD1, AC020907.2, LGI4, CTD, 2527I21.4	upstream, gene, variant, missense, non, coding, transcript, exon, downstream
rs56070233	3	36780080	C	T	0.0167211	-0.000163148	0.00133832	309814	2	GGT	DCLK3	missense, variant
rs78396863	18	46196971	G	C	0.0167138	0.000163605	0.00134167	1244972	4	HDL	CTIF, MIR4743, RP11, 426J5.2	intron, variant, non, coding, transcript, exon, downstream, gene
rs147087775	2	183387309	C	A	0.0166912	-0.000161271	0.0013255	4850255	2	IGF1	PDE1A	upstream, gene, variant, intron, non, coding, transcript
rs61745250	18	57106987	G	A	0.0166266	-0.000156199	0.00129106	254557	2	BMI	CCBE1	intron, variant, synonymous, non, coding, transcript, exon
rs72665902	4	89978445	A	T	0.0166186	0.000156005	0.0012899	2488815	2	SHBG	FAM13A	upstream, gene, variant, intron, non, coding, transcript, 5, prime, UTR
rs144459600	19	46375608	C	T	0.0166076	0.00019737	0.00159056	3725928	4	TPROT	FOXA3	synonymous, variant
rs61942134	12	106641297	G	A	0.0165232	0.000163587	0.00134724	3480919	5	IGF1	CKAP4, RP11, 651L5.2	synonymous, variant, upstream, gene, intron, non, coding, transcript
rs16916115	10	63172694	A	G	0.0164957	-0.000152983	0.00127188	1797753	3	TBIL	TMEM26	missense, variant, downstream, gene, intron, 3, prime, UTR, NMD, transcript, non, coding
rs2233374	17	47300081	C	G	0.0164877	-0.000172755	0.001422	26139	5	SHBG	ABI3, PHOSPHO1	3, prime, UTR, variant, downstream, gene
rs4786412	16	3440390	T	C	0.016452	0.000177482	0.00145059	158857	5	IGF1	ZSCAN32, NAA60	intron, variant, non, coding, transcript, NMD
rs726252	1	176660247	T	C	0.0164194	-0.000164853	0.00136781	350840	4	IGF1	PAPPA2	3, prime, UTR, variant, intron
rs72732679	9	107618298	G	A	0.0163959	-0.000154969	0.00129425	209890	6	HDL	ABCA1	intron, variant, synonymous
rs12420424	11	56756516	G	C	0.0163749	-0.000174304	0.00143015	4877939	3	HDL	OR5AK2	missense, variant
rs147034719	4	70071268	G	A	0.0163623	-0.00015488	0.00129152	255544	3	GGT	UGT2B11, RP11, 704M14.1	synonymous, variant, intron, non, coding, transcript, exon
rs2433724	19	54545531	T	C	0.0163384	0.000191606	0.00155906	178312	2	ALP	VSTM1	missense, variant, splice, region, intron, 3, prime, UTR, NMD, transcript
rs28429181	10	69902919	T	C	0.0162904	0.00015201	0.00127067	4932472	2	TRIG	MYPN	intron, variant
rs28469095	19	45655333	T	C	0.0162426	0.000182141	0.00149355	4290546	5	ALP	PPP1R37, NKPD1, MARK4, AC005757.7	downstream, gene, variant, missense, intron, upstream
rs117685578	20	47841556	C	A	0.0161741	-0.000164885	0.00136787	4017614	5	HDL	DDX27	intron, variant, non, coding, transcript
rs35062203	2	73717921	C	G	0.0161242	-0.000155313	0.00130202	497564	2	CREA	ALMS1, AC096546.1	missense, variant, upstream, gene, intron, NMD, transcript, non, coding, exon
rs114889222	6	30889292	C	T	0.0160195	-0.000171527	0.00142216	2699218	6	PHOS	VARS2	intron, variant, downstream, gene, non, coding, transcript, upstream
rs41462047	18	57014846	G	A	0.0159867	-0.000149272	0.00125966	346698	2	BMI	LMAN1	intron, variant, non, coding, transcript
rs10445896	2	58390547	G	A	0.0159744	0.000140043	0.00119296	2697010	2	CAL	FANCL, VRK2	intron, variant, downstream, gene, non, coding, transcript, exon, 3, prime, UTR
rs61744166	19	46289059	G	A	0.0159653	-0.000182296	0.00150256	682751	6	CHO	DMWD, DMPK, AC011530.4	synonymous, variant, upstream, gene, NMD, transcript, downstream
rs144498730	1	12198362	C	A	0.0159548	-0.000168093	0.00140025	335243	2	SBP	TNFRSF8	missense, variant, intron, non, coding, transcript, 3, prime, UTR, NMD
rs41285336	6	131902329	G	A	0.0159545	-0.00015147	0.00127793	4399476	3	URA	ARG1, MED23	intron, variant, non, coding, transcript, downstream, gene
rs487915	12	121176549	C	T	0.01595	-0.00016565	0.00138193	104167	3	ALP	ACADS, RP11, 173P15.7	intron, variant, downstream, gene
rs72797924	2	24949668	T	C	0.0159328	0.00014693	0.00124396	3480201	4	CHO	NCOA1	intron, variant
rs10154841	3	53845295	C	T	0.0159285	-0.00015344	0.0012923	4096446	3	HBA1C	CACNA1D, CHDH	synonymous, variant, downstream, gene, 3, prime, UTR
rs3748962	2	212251864	T	C	0.0158766	0.00015171	0.00128097	820498	3	CREA	ERBB4	synonymous, variant
rs2254560	19	47944710	C	T	0.0158756	0.000177431	0.00147133	2550038	5	HDL	SLC8A2	splice, polypyrimidine, tract, variant, intron, non, coding, transcript
rs77539762	1	21945530	C	T	0.0158711	-0.0001702	0.00141769	1757496	3	GGT	RAP1GAP	synonymous, variant, non, coding, transcript, exon, downstream, gene, NMD
rs12910830	15	56122664	T	C	0.0158599	0.000157282	0.00132232	4783924	2	GGT	NEDD4	intron, variant, NMD, transcript
rs140699510	15	44969130	G	A	0.0158472	-0.000153652	0.00129604	2865045	2	IGF1	PATL2	upstream, gene, variant, intron, non, coding, transcript
rs147596194	9	116356430	G	T	0.015816	0.0001598	0.00134285	752423	2	AST	RGS3, RP11, 168K11.2	intron, variant, upstream, gene, missense, non, coding, transcript, downstream, exon
rs56044827	3	41960004	A	G	0.0158001	-0.000152388	0.00128825	3976601	2	AST	ULK4	synonymous, variant, downstream, gene, upstream
rs72823378	17	37401480	G	C	0.0157683	-0.000164678	0.00139013	428340	3	CREA	RP11, 690G19.4	intron, variant, non, coding, transcript
rs62625030	10	60577396	A	G	0.0157373	0.000144943	0.0012349	4393051	3	ALP	BICC1	downstream, gene, variant, missense
rs626251	1	60466814	T	C	0.0157223	0.000151816	0.00128605	2929170	3	TRIG	C1orf87	missense, variant, non, coding, transcript, exon
rs77809659	2	160802575	T	C	0.0157063	0.000152923	0.00129502	4743391	3	SHBG	PLA2R1	intron, variant, 3, prime, UTR, upstream, gene
rs3212808	19	51329272	T	G	0.015706	-0.000181255	0.00150672	2133224	3	URA	KLK1, KLK15, AC011523.2	upstream, gene, variant, intron, non, coding, transcript, exon, downstream, NMD
rs2230297	11	120745874	C	T	0.015694	-0.000156346	0.00132071	4183310	3	LDL	GRIK4, RP11, 640N11.2	synonymous, variant, intron, non, coding, transcript, exon
rs45449992	22	25275523	C	A	0.0156525	0.000166071	0.00139447	290087	14	GGT	SGSM1	intron, variant, non, coding, transcript
rs16939904	12	109520769	A	G	0.0156339	0.000155362	0.00131602	2283954	4	HDL	USP30	missense, variant, downstream, gene, upstream, non, coding, transcript, exon
rs61749178	10	60127732	C	G	0.0155661	-0.000142918	0.00122524	4842715	3	TBIL	UBE2D1	synonymous, variant, non, coding, transcript, exon, upstream, gene
rs2241950	17	77914561	C	T	0.015526	0.000172263	0.00144588	1689727	2	APOA	TBC1D16, AC100791.1	3, prime, UTR, variant, upstream, gene, downstream
rs9763260	5	42514179	T	C	0.0155226	-0.000141946	0.00121942	2203216	2	URA	GHR	intron, variant, upstream, gene, NMD, transcript
rs114328096	1	65898364	A	T	0.0155198	-0.000147367	0.00125951	2502380	2	CHO	LEPR, LEPROT	intron, variant, 3, prime, UTR, downstream, gene
rs1980770	13	100206495	G	T	0.0155189	0.000141804	0.00121866	4051422	2	ALP	TM9SF2	intron, variant
rs143322306	19	50161380	C	T	0.0154768	0.000181603	0.0015198	59844	3	ALB	IRF3, SCAF1	downstream, gene, variant, intron
rs145911635	6	43155718	G	A	0.0154724	0.000162446	0.00137392	1498930	4	CREA	CUL9	missense, variant, non, coding, transcript, exon
rs11556510	19	45394819	T	G	0.0154068	-0.000184623	0.00155257	147	7	CRP	PVRL2, TOMM40, CTB, 129P6.4	downstream, gene, variant, missense, upstream
rs7913176	10	115644040	G	A	0.0153269	0.000145905	0.00125467	567180	2	SBP	NHLRC2	missense, variant
rs2074468	6	29408270	C	T	0.015312	0.000142283	0.00122853	3541301	4	URT	OR11A1, OR10C1	intron, variant, missense
rs111700303	4	103560795	G	A	0.0152886	0.000139228	0.00120614	135834	3	HDL	MANBA	intron, variant, non, coding, transcript
rs17100874	14	102843057	C	T	0.0152767	-0.000147683	0.00126944	177053	3	APOA	TECPR2	5, prime, UTR, variant, non, coding, transcript, exon
rs11556624	17	37815304	G	C	0.0152644	-0.000164368	0.00140033	4363663	4	HDL	STARD3	missense, variant, splice, region, downstream, gene, non, coding, transcript, exon, upstream, NMD
rs4323847	11	13031705	G	C	0.0152588	0.000162668	0.00138314	3303102	2	DBP	RASSF10, CTC, 497E21.3	non, coding, transcript, exon, variant, upstream, gene
rs34509011	4	101401015	T	C	0.0152543	0.000135578	0.00117986	1392219	2	ALT	EMCN	intron, variant, non, coding, transcript, downstream, gene, upstream
rs12042065	1	159778699	G	A	0.0152375	-0.000165306	0.00140492	171101	5	CRP	FCRL6	intron, variant, non, coding, transcript, exon, downstream, gene
rs183559995	18	47365444	G	A	0.0152332	0.000148023	0.0012757	32208	5	APOA	MYO5B, SCARNA17, RP11, 886H22.1	intron, variant, non, coding, transcript, upstream, gene
rs11853730	15	87217488	C	T	0.0151605	-0.000150773	0.00129646	3594852	3	SBP	AGBL1	splice, polypyrimidine, tract, variant, intron
rs111294347	3	57857439	A	G	0.0151352	-0.000143681	0.00124637	617163	4	AST	SLMAP	intron, variant, non, coding, transcript
rs41282518	1	112033250	G	A	0.015091	-0.000155858	0.0013371	893249	8	APOB	RNU6, 792P, ADORA3	upstream, gene, variant, intron
rs1880898	20	45204266	A	G	0.0150797	-0.000150139	0.00129435	1380324	2	CRP	SLC13A3	synonymous, variant, intron
rs17783977	2	163250987	G	A	0.0150512	-0.000143512	0.00124541	2294979	3	SHBG	KCNH7	synonymous, variant
rs111804875	6	14118034	G	A	0.0150257	0.000139498	0.00121569	2007457	2	LDL	CD83	5, prime, UTR, variant
rs12401573	1	156146218	T	C	0.0149638	-0.000158217	0.00136059	820433	2	URA	SEMA4A	synonymous, variant, downstream, gene, non, coding, transcript, exon
rs72876208	2	170055264	C	T	0.0149407	-0.000151196	0.00131021	33776	4	ALP	LRP2	intron, variant
rs941048	12	18234256	T	C	0.0149234	-0.000136959	0.00119927	2640305	8	TBIL	RERGL	missense, variant, downstream, gene, non, coding, transcript, exon
rs36124608	22	36961017	G	A	0.0148769	0.000153809	0.00132918	2812316	2	CRP	CACNG2, RP5, 1119A7.17	intron, variant, upstream, gene
rs146460263	16	57247040	T	G	0.0148654	-0.000151215	0.00130857	82892	5	APOA	RSPRY1	intron, variant, downstream, gene, non, coding, transcript
rs28736552	4	88356111	T	C	0.0148634	0.000143067	0.00125621	866481	2	SHBG	NUDT9	intron, variant, NMD, transcript, non, coding
rs77115522	8	41753843	C	G	0.0148406	0.000135983	0.00119618	1397625	3	HBA1C	ANK1	intron, variant
rs2009733	19	8398714	G	A	0.0148354	-0.000167847	0.00143892	1999933	4	IGF1	KANK3	intron, variant, downstream, gene
rs56235473	20	44528388	C	A	0.014834	-0.000151307	0.00131153	4619868	3	APOB	CTSA, PLTP	downstream, gene, variant, intron
rs33943601	20	39801128	C	T	0.0147962	-0.000147773	0.00128708	4022814	3	CHO	PLCG1	synonymous, variant, non, coding, transcript, exon, downstream, gene, missense, NMD, upstream
rs142476797	1	53099085	C	T	0.0147574	0.000149799	0.0013023	2440344	4	CHO	FAM159A	non, coding, transcript, exon, variant, upstream, gene, 5, prime, UTR
rs1010545	17	64684642	T	C	0.014732	-0.000144806	0.0012654	2652070	3	IGF1	PRKCA	intron, variant, NMD, transcript
rs7640523	3	188956787	A	G	0.0147257	0.000147828	0.00128856	2651763	2	CAL	TPRG1, AS2	intron, variant, non, coding, transcript
rs16885	6	16306751	G	A	0.0146964	-0.000136194	0.00120094	181260	2	APOB	ATXN1	missense, variant
rs822430	1	156902259	A	G	0.0146834	0.000154231	0.00133938	1576474	2	URA	ARHGEF11, LRRC71, MIR765	downstream, gene, variant, synonymous, non, coding, transcript, exon, intron
rs142075522	19	51052073	G	A	0.0146602	0.000170355	0.00146554	3402737	3	APOA	LRRC4B	missense, variant
rs13417885	2	167321931	A	G	0.0146207	0.000138953	0.00122396	1775965	3	TRIG	SCN7A	intron, variant, NMD, transcript, non, coding
rs116335653	3	142151500	T	C	0.0145965	0.000134111	0.00118856	247503	2	CREA	XRN1	splice, donor, region, variant, intron, downstream, gene, non, coding, transcript, upstream, NMD
rs2277560	15	40453497	A	G	0.0145498	0.000139263	0.0012286	1650588	2	IGF1	BUB1B	intron, variant, NMD, transcript, non, coding
rs56353055	1	156347309	A	G	0.0145158	0.000152366	0.00133094	1407350	4	SHBG	RHBG	intron, variant, NMD, transcript, non, coding, upstream, gene
rs7883913	23	108652306	C	T	0.0144984	0.00011421	0.00104021	53494	2	APOB	GUCY2F	missense, variant
rs3431	1	156374256	C	T	0.0144927	0.000150589	0.00131795	1500381	7	CRP	C1orf61	3, prime, UTR, variant, non, coding, transcript, exon, downstream, gene
rs139259612	19	54970776	A	G	0.0144616	-0.000165085	0.00143246	532722	2	AST	LENG8, LENG9	intron, variant, downstream, gene, 3, prime, UTR
rs61219833	2	170147266	T	C	0.0144484	-0.000139424	0.00123307	4601300	3	SHBG	LRP2	intron, variant
rs41277008	20	39833631	C	T	0.0144472	0.000143307	0.00126408	3990311	3	LDL	ZHX3	5, prime, UTR, variant, upstream, gene, NMD, transcript
rs75592724	4	68797664	C	T	0.0144467	-0.000137339	0.00121625	4136524	6	VITD	TMPRSS11A, UBA6, AS1	intron, variant, non, coding, transcript
rs7255164	19	43268069	A	G	0.01444	-0.000158577	0.00138224	1903282	5	ALP	PSG8	splice, region, variant, synonymous, intron, non, coding, transcript, NMD, exon
rs146247785	19	57174893	C	T	0.014434	0.000164152	0.00142623	2720083	3	HDL	ZNF835	3, prime, UTR, variant, downstream, gene
rs75081071	12	116440740	G	A	0.0144105	0.000147004	0.00129299	4839976	3	ALP	MED13L	intron, variant, downstream, gene
rs78750735	19	49956688	T	C	0.0143597	0.000159845	0.00139541	4562016	3	ALT	PIH1D1, ALDH16A1	upstream, gene, variant, intron, NMD, transcript, 5, prime, UTR, non, coding
rs76486037	10	50396319	C	A	0.0143334	-0.000128855	0.00115541	3110700	2	CREA	C10orf128	intron, variant, non, coding, transcript
rs12547063	8	117786616	G	A	0.0143076	-0.000120917	0.00109549	355938	2	HDL	UTP23	3, prime, UTR, variant, intron, downstream, gene, NMD, transcript
rs11569225	3	141697353	T	C	0.0142775	0.000131985	0.00118373	206644	2	CREA	TFDP2	intron, variant, downstream, gene, NMD, transcript, non, coding
rs41286560	14	101349454	G	T	0.0142312	-0.000135884	0.00121221	1103406	4	GGT	MIR433, MIR127, MIR136, MIR431, RTL1, MIR432	downstream, gene, variant, upstream, missense
rs73691404	7	44180220	G	T	0.0142241	-0.000141982	0.00127171	173410	5	HBA1C	MYL7, GCK	intron, variant, downstream, gene, NMD, transcript, non, coding, upstream, 3, prime, UTR
rs16853245	3	168862731	T	A	0.0142151	-0.000126295	0.00114007	3147565	3	IGF1	MECOM	intron, variant, downstream, gene
rs6421335	10	102507339	T	C	0.0142007	-0.000144478	0.00128074	806782	3	ALT	PAX2	intron, variant, non, coding, transcript, exon, upstream, gene, NMD
rs77051628	2	20455757	C	G	0.0141698	-0.000138004	0.00123114	4590869	2	BMI	PUM2	intron, variant
rs4376712	1	89522512	C	T	0.0141489	-0.000135388	0.00121304	68774	3	GGT	GBP1	intron, variant, downstream, gene, upstream, non, coding, transcript
rs113744302	12	21590600	C	T	0.0141099	0.000129276	0.00116632	716039	8	TBIL	PYROXD1	upstream, gene, variant, 5, prime, UTR, NMD, transcript
rs7545406	1	152193286	T	G	0.014091	0.000141533	0.00126277	1589671	3	VITD	HRNR, FLG, AS1	missense, variant, intron, non, coding, transcript
rs1200346	15	41819896	T	G	0.0140556	0.000132204	0.0011905	3815980	3	CREA	RPAP1	intron, variant, upstream, gene, NMD, transcript, downstream
rs17520056	2	208478055	A	G	0.0140337	0.000133103	0.00119735	2953311	3	CREA	METTL21A	synonymous, variant, intron, 3, prime, UTR, downstream, gene, upstream
rs41286783	1	91784774	A	G	0.0140149	0.000132793	0.00119552	2331036	3	GGT	HFM1	splice, region, variant, polypyrimidine, tract, intron, non, coding, transcript
rs28538722	9	107367813	G	C	0.0139952	0.000125722	0.00114118	40595	6	HDL	OR13C2	missense, variant
rs34480825	17	45915766	T	C	0.0139805	0.0001412	0.00126267	3736799	3	APOA	LRRC46, SCRN2	downstream, gene, variant, missense, 3, prime, UTR, NMD, transcript
rs1339580	10	60027122	C	T	0.0139428	0.000125724	0.00114259	4943325	3	TBIL	CISD1, IPMK	upstream, gene, variant, intron
rs4133017	16	53699003	A	G	0.0138937	0.000139995	0.00125512	3465145	5	APOA	RPGRIP1L	intron, variant
rs1877547	3	188584186	G	A	0.0138384	-0.000137751	0.00124038	2279162	2	CAL	LPP	intron, variant, downstream, gene
rs139811700	7	80546150	C	A	0.0138255	-0.000119761	0.00109962	2101781	3	CREA	SEMA3C	splice, polypyrimidine, tract, variant, intron, NMD, transcript, non, coding
rs79638520	17	33679943	C	T	0.0138093	-0.000134431	0.00121511	4149877	3	CREA	SLFN11	missense, variant, intron
rs281416	19	10418784	G	A	0.0137881	0.000158207	0.00140874	20137	4	IGF1	FDX1L, ZGLP1, CTD, 2369P2.10	downstream, gene, variant, intron, NMD, transcript, upstream
rs2246832	3	49881134	T	A	0.0137477	-0.00013062	0.00118901	132285	3	HBA1C	TRAIP	intron, variant, NMD, transcript, downstream, gene, upstream, non, coding, exon
rs41280696	7	47331594	G	A	0.0137443	-0.000130192	0.0011837	958204	3	IGF1	TNS3	missense, variant
rs79814209	15	86702241	C	T	0.01374	0.000134799	0.00122037	4110099	3	SBP	AGBL1	missense, variant
rs142301466	7	44558216	C	T	0.0137342	0.000130696	0.00118939	551406	5	HBA1C	NPC1L1	synonymous, variant, intron
rs2289643	17	6515454	T	C	0.0137167	-0.000150204	0.00134421	1586812	3	HBA1C	KIAA0753	missense, variant, intron, NMD, transcript, 3, prime, UTR
rs2287417	2	211341599	T	G	0.013704	0.000130973	0.00119318	89767	3	CREA	LANCL1, CPS1	upstream, gene, variant, intron
rs10412726	19	55832427	T	G	0.0136697	-0.00015516	0.00138607	1394373	2	AST	TMEM150B	5, prime, UTR, variant, splice, polypyrimidine, tract, intron, upstream, gene, NMD, transcript, non, coding, exon
rs2147896	10	100148176	A	G	0.0135903	-0.000131881	0.00120225	4106019	2	DBP	PYROXD2	missense, variant, non, coding, transcript, exon, intron
rs11544860	2	20424655	G	A	0.0135699	-0.000124953	0.00114786	1044812	5	APOA	SDC1	5, prime, UTR, variant, upstream, gene, NMD, transcript
rs57010209	1	67313249	G	A	0.0135516	-0.000128474	0.00117638	3917265	3	APOA	WDR78	synonymous, variant, downstream, gene, 3, prime, UTR, NMD, transcript, intron
rs17826038	20	42355169	G	C	0.0135434	-0.000132845	0.00121149	1468773	2	SHBG	GTSF1L	missense, variant
rs185466737	17	64128757	A	T	0.0135281	0.000129941	0.00118886	309535	2	APOB	CEP112	intron, variant
rs77682879	10	71075678	G	T	0.0134932	-0.000140746	0.00128333	623516	10	HBA1C	HK1	5, prime, UTR, variant, upstream, gene, intron, non, coding, transcript
rs10747222	18	54677019	A	T	0.0134775	-0.000122883	0.00113442	1737189	2	GGT	WDR7	intron, variant, NMD, transcript
rs13164201	5	41842746	T	C	0.0134287	-0.000114468	0.00106946	517755	2	IGF1	OXCT1	intron, variant, non, coding, transcript
rs11107	22	32875190	G	A	0.0133972	-0.000136741	0.00124779	4630576	2	HBA1C	FBXO7	missense, variant, start, lost, intron, NMD, transcript, 3, prime, UTR, non, coding, exon
rs147845905	18	53017727	C	T	0.013391	-0.000121842	0.00112871	3396481	2	ALT	TCF4	intron, variant, downstream, gene, non, coding, transcript
rs45503595	14	93407583	T	C	0.0133886	0.000133514	0.00122238	1380844	3	SHBG	ITPK1	3, prime, UTR, variant, intron
rs117916534	11	62434525	G	C	0.0133865	-0.000136484	0.00124619	800070	2	ALP	C11orf48, C11orf83, SNORA57, METTL12, RP11, 831H9.11	intron, variant, upstream, gene, downstream, non, coding, transcript, exon, 3, prime, UTR
rs5760351	22	24730587	C	T	0.013353	0.000150623	0.00137421	254849	14	GGT	SPECC1L, ADORA2A	intron, variant, NMD, transcript, downstream, gene
rs113643939	20	35437196	C	A	0.0133499	-0.000127599	0.00117604	1689788	2	CREA	SOGA1	intron, variant, NMD, transcript
rs13010837	2	24033468	T	C	0.013319	0.000128919	0.00118841	380326	3	HBA1C	ATAD2B	intron, variant, non, coding, transcript
rs196912	17	62121480	C	T	0.0132987	0.000126182	0.0011664	2931178	2	PHOS	ERN1	synonymous, variant
rs4646690	15	101455009	G	C	0.0132819	0.000121398	0.00112859	2861122	3	URT	LRRK1, ALDH1A3, RP11, 66B24.4	upstream, gene, variant, 3, prime, UTR, non, coding, transcript, exon, intron, downstream
rs34448954	1	161168189	C	T	0.013262	0.000140189	0.00128216	205327	8	TPROT	NDUFS2, ADAMTS4	upstream, gene, variant, missense, intron, non, coding, transcript
rs11629584	15	90128966	T	C	0.0132478	-0.000129327	0.00119341	683374	3	SBP	TICRR, RP11, 429B14.1, 429B14.3	missense, variant, intron, non, coding, transcript, upstream, gene
rs755931	1	35227673	A	G	0.0132432	0.000131931	0.00121457	4828754	3	APOA	GJB5, GJB4, SMIM12, RP1, 34M23.5	downstream, gene, variant, 3, prime, UTR, intron, NMD, transcript, non, coding
rs41279452	1	12342990	G	A	0.0132321	0.000136131	0.00124963	479871	2	SBP	VPS13D	missense, variant
rs7479732	11	92088177	C	T	0.013232	0.000117856	0.00110177	426607	3	ALT	FAT3	synonymous, variant, upstream, gene
rs2304426	2	25602142	A	G	0.0132286	-0.0001185	0.0011072	4132675	4	CHO	DTNB, AC012074.2	intron, variant, NMD, transcript, upstream, gene, non, coding, downstream
rs141645766	18	77895325	T	G	0.0132185	-0.000113502	0.00106756	2864103	2	URA	ADNP2	missense, variant, downstream, gene, intron
rs142941150	16	57149318	G	A	0.0132037	-0.000150009	0.00137135	187409	10	HDL	CPNE2	intron, variant, upstream, gene, downstream
rs61732915	1	13718644	C	T	0.0131994	0.000137112	0.00125824	2705188	2	AST	PRAMEF17	synonymous, variant
rs2233668	17	47484050	C	T	0.0131952	0.000134177	0.00124285	157830	5	SHBG	PHB, RP11, 1079K10.4, 81K2.1	intron, variant, downstream, gene, non, coding, transcript
rs17599586	6	131904719	C	T	0.0131192	-0.000126614	0.00117703	402316	3	PHOS	ARG1, MED23	downstream, gene, variant, intron
rs13346373	19	33211069	C	T	0.0131184	0.000135569	0.00124855	2533476	4	ALB	TDRD12, CTD, 2538C1.3	intron, variant, upstream, gene
rs149332039	17	63156785	G	A	0.0131037	0.000123781	0.00115332	3966483	3	CREA	RGS9	intron, variant, non, coding, transcript, downstream, gene, NMD
rs1540108	11	122680599	C	T	0.013099	0.000128188	0.00118917	3368787	4	ALP	UBASH3B	3, prime, UTR, variant
rs150263627	3	121215589	A	C	0.0130862	-0.000129682	0.00120271	1554613	5	CAL	POLQ, RPL7AP11	intron, variant, downstream, gene
rs115071709	17	8296046	A	G	0.0130595	-0.000148232	0.00135399	617806	15	SHBG	RNF222	3, prime, UTR, variant
rs77014442	3	46726948	C	A	0.0129817	0.000121647	0.00114035	790343	2	AST	ALS2CL	intron, variant, NMD, transcript
rs34949308	22	36886112	G	A	0.0129778	-0.000135463	0.00126081	2887221	2	GGT	FOXRED2	synonymous, variant
rs143386417	11	64112394	G	A	0.012931	0.000140199	0.00129815	124583	7	URT	CCDC88B	5, prime, UTR, variant, missense, upstream, gene, non, coding, transcript, exon
rs114886022	3	137787916	G	A	0.0129128	-0.000115798	0.00109491	4116081	2	CREA	DZIP1L	intron, variant, 3, prime, UTR, upstream, gene, non, coding, transcript
rs117697674	12	122973836	A	G	0.0129089	0.000127197	0.00118845	2383339	6	HDL	ZCCHC8, SNORA9	intron, variant, downstream, gene
rs11556379	20	42343821	C	G	0.012837	0.000126885	0.0011877	1480121	5	HDL	MYBL2	missense, variant
rs79893125	17	62029006	A	G	0.0128358	-0.000121785	0.00114606	4072492	2	TPROT	SCN4A	synonymous, variant, upstream, gene
rs960978	8	80678865	C	A	0.0127999	0.000109129	0.00104473	4225838	3	URT	HEY1, RP11, 26J3.1, 27N21.3	intron, variant, upstream, gene, downstream
rs72814215	10	70998703	G	A	0.0127832	0.000128545	0.00120387	786104	10	HBA1C	HKDC1	intron, variant
rs76650680	14	105423809	G	A	0.0127797	0.000119067	0.00112611	2403699	3	HDL	AHNAK2	missense, variant, non, coding, transcript, exon, upstream, gene
rs10138807	14	21492310	C	T	0.0127736	0.000129736	0.00121361	3217261	2	SHBG	NDRG2, AL161668.5, TPPP2	upstream, gene, variant, intron, non, coding, transcript, exon, NMD, 5, prime, UTR, splice, polypyrimidine, tract
rs13002912	2	98351986	C	T	0.0127696	0.00011659	0.00110607	2390406	3	TPROT	ZAP70	intron, variant, non, coding, transcript, downstream, gene, upstream
rs80095370	16	5037523	C	G	0.0127635	-0.000114354	0.00108781	1474984	2	BMI	SEC14L5	intron, variant
rs137902693	2	161052194	G	T	0.0127498	0.000120783	0.00114072	4493772	3	SHBG	ITGB6	intron, variant, NMD, transcript, non, coding
rs2293514	12	124885249	T	C	0.0127441	0.000126918	0.00119144	3604533	3	SHBG	NCOR2	intron, variant
rs4661213	1	156670545	T	C	0.0127429	-0.000133682	0.00124741	1344760	5	GGT	CRABP2	downstream, gene, variant, intron
rs9912861	17	73101617	G	A	0.0127373	-0.000138281	0.00128591	3123217	2	HDL	ARMC7, SLC16A5	upstream, gene, variant, intron, downstream
rs41275104	13	110895092	A	G	0.0126919	-0.000117885	0.00111888	1418397	2	LDL	COL4A1	splice, polypyrimidine, tract, variant, intron
rs403609	16	2014424	G	C	0.0126831	0.000134182	0.00125458	1585254	5	IGF1	NDUFB10, RNF151, RPS2, SNORA10, SNORA64, SNHG9, AC005363.9	downstream, gene, variant, upstream, intron, non, coding, transcript, exon
rs45444304	13	92346139	A	G	0.0126386	-0.000111425	0.00106774	3808934	2	ALP	GPC5	splice, donor, region, variant, intron
rs2076083	22	36912724	C	T	0.0126014	0.000131146	0.00123962	2860609	2	GGT	EIF3D	intron, variant, non, coding, transcript, downstream, gene, NMD, upstream
rs74873109	11	47861857	A	G	0.0125486	-0.000107448	0.00104817	447004	2	SBP	NUP160, RP11, 692M12.4	intron, variant, missense, non, coding, transcript, upstream, gene
rs13184107	5	55178976	G	A	0.0125326	-0.000103069	0.00100285	1942401	2	GGT	IL31RA	missense, variant
rs7920604	10	93221077	G	A	0.0125257	0.000122473	0.00116242	1642808	2	TBIL	HECTD2, RP11, 108M11.3	synonymous, variant, upstream, gene, downstream
rs145964073	10	55584850	T	A	0.0124814	0.000109424	0.00105607	2077831	2	URT	PCDH15	intron, variant, NMD, transcript, non, coding
rs28997576	2	215617178	C	G	0.0124697	0.000113644	0.00109117	4185812	2	URA	BARD1	missense, variant, 3, prime, UTR, NMD, transcript, non, coding, exon
rs1802669	10	21827796	G	A	0.0124625	0.000121019	0.00115213	3564538	7	AST	MLLT10	synonymous, variant, non, coding, transcript, exon, intron
rs186745632	21	40582173	G	A	0.0124477	0.000123122	0.00117106	3295449	3	IGF1	BRWD1	intron, variant, NMD, transcript, non, coding
rs181067717	7	128491324	C	T	0.0124434	-0.000113624	0.00109185	1517991	2	ALP	FLNC, RP11, 309L24.2	missense, variant, intron, non, coding, transcript
rs191458955	12	6715630	G	C	0.0124427	0.000117815	0.00112656	311514	2	PHOS	CHD4	splice, polypyrimidine, tract, variant, intron, upstream, gene
rs62362480	5	76926651	A	C	0.0124232	-0.000119826	0.00114398	1050189	2	TPROT	OTP	intron, variant
rs57047289	2	161132293	T	C	0.0124185	-0.000115066	0.00110456	4413673	3	TRIG	RBMS1, ITGB6	intron, variant, upstream, gene, non, coding, transcript
rs61734679	1	158325891	T	C	0.0124018	0.000129635	0.00122681	3000106	5	GGT	CD1E	intron, variant, synonymous, downstream, gene
rs11611847	12	112647772	T	C	0.0123756	-0.000117865	0.00112991	843049	3	TBIL	HECTD4	intron, variant, non, coding, transcript
rs35347445	14	94935807	G	A	0.0123449	0.000122954	0.00117282	147380	4	ALB	SERPINA9, RP11, 349I1.2	intron, variant, missense, splice, region, polypyrimidine, tract, downstream, gene, synonymous, NMD, transcript
rs183446331	12	124371684	C	T	0.0123256	-0.000123245	0.00117565	3073201	4	GGT	DNAH10	splice, region, variant, polypyrimidine, tract, intron, downstream, gene
rs34443342	3	121631993	T	G	0.0123028	0.000120606	0.00115486	1670689	2	HBA1C	SLC15A2	intron, variant, upstream, gene
rs80229424	16	70384434	C	T	0.0122774	0.000114763	0.00110685	1411079	2	APOB	DDX19A, RP11, 529K1.2, 529K1.3	intron, variant, NMD, transcript, upstream, gene, non, coding
rs34821485	12	122481879	A	C	0.0122744	0.000122881	0.00117466	1077357	4	GGT	BCL7A	missense, variant, non, coding, transcript, exon
rs115720584	1	150470061	C	T	0.0122648	0.000130198	0.00123717	4855724	5	GGT	TARS2	3, prime, UTR, variant, NMD, transcript, missense, non, coding, exon, intron
rs114276513	17	74349515	G	A	0.0122596	0.000133391	0.00126508	1771321	6	HBA1C	PRPSAP1	intron, variant, 5, prime, UTR, non, coding, transcript
rs117552750	15	76994111	T	C	0.0122576	-0.000118483	0.00113979	964442	2	CREA	SCAPER	non, coding, transcript, exon, variant, synonymous, downstream, gene
rs11085909	19	14830749	A	G	0.0122381	0.000135592	0.00128397	4432102	4	IGF1	ZNF333, AC090427.1	3, prime, UTR, variant, downstream, gene, intron, upstream, NMD, transcript
rs55854167	19	18322155	C	A	0.0122341	0.000130191	0.00123817	991186	2	SHBG	PDE4C, AC068499.10	intron, variant, non, coding, transcript, NMD, downstream, gene
rs36121075	20	43118017	G	A	0.0122319	-0.000121124	0.0011625	3209497	3	APOB	TTPAL	synonymous, variant, 3, prime, UTR, non, coding, transcript, exon
rs11724788	4	5018702	A	G	0.0122265	-0.000117622	0.00113237	954147	2	ALB	CYTL1	splice, polypyrimidine, tract, variant, intron
rs143575043	19	14153248	G	A	0.0122202	-0.000133883	0.00126972	2885278	4	CHO	IL27RA	splice, polypyrimidine, tract, variant, intron
rs112578033	11	66260134	G	A	0.0122121	-0.0001278	0.00122168	4625679	3	HDL	DPP3	intron, variant, non, coding, transcript, downstream, gene
rs11557280	7	44685048	A	G	0.0121686	0.000113017	0.00109589	678238	5	HBA1C	OGDH	synonymous, variant, intron
rs55928096	18	77210909	G	A	0.0121499	-0.00010387	0.00102214	2179687	2	CREA	NFATC1	intron, variant, non, coding, transcript, NMD, upstream, gene
rs72851170	17	62022382	G	A	0.0121407	-0.000116172	0.00112351	10190	3	IGF1	SCN4A	synonymous, variant, downstream, gene
rs8050209	16	88105725	A	G	0.0121299	0.00012406	0.00119028	1060295	4	HBA1C	BANP	synonymous, variant, non, coding, transcript, exon
rs117076618	12	2022148	G	A	0.0120424	-0.000109875	0.00107354	1022505	3	ALP	CACNA2D4, RP5, 1096D14.3	intron, variant, non, coding, transcript, NMD, upstream, gene
rs2232329	2	169764616	G	A	0.0120352	-0.000123007	0.00120532	26153	4	HBA1C	G6PC2, SPC25	3, prime, UTR, variant, NMD, transcript, downstream, gene, intron, non, coding, exon
rs41313254	1	93592869	A	G	0.0120272	-0.000111303	0.00108608	4139131	3	GGT	MTF2	intron, variant, non, coding, transcript, upstream, gene
rs117362358	10	13689011	C	T	0.0120254	-0.000116179	0.00112693	4574247	7	AST	FRMD4A, RP11, 295P9.3	3, prime, UTR, variant, downstream, gene, non, coding, transcript, exon, intron, upstream
rs3783393	14	103806219	G	A	0.0120124	-0.000113879	0.00110863	1353359	4	GGT	EIF5, SNORA28	intron, variant, downstream, gene, upstream, non, coding, transcript
rs35071361	8	42012186	T	C	0.0119931	-0.000105316	0.0010371	1655968	3	HBA1C	AP3M2, RP11, 589C21.5	5, prime, UTR, variant, upstream, gene, NMD, transcript, intron, non, coding, exon
rs112238647	15	79051705	C	T	0.0119806	-0.000115219	0.00112223	3022036	2	CREA	ADAMTS7	3, prime, UTR, variant, downstream, gene
rs836860	3	122807995	A	G	0.0119374	0.000118931	0.00115382	37793	5	CAL	PDIA5	intron, variant, NMD, transcript, non, coding, exon
rs73171597	3	171064963	G	T	0.0119289	-0.000102696	0.00101711	189226	3	HBA1C	TNIK	intron, variant, 3, prime, UTR
rs17038590	12	107033246	T	G	0.0119237	-0.000110774	0.00108503	4771477	2	URT	RFX4, RP11, 144F15.1	intron, variant, non, coding, transcript, NMD
rs1053266	10	61552692	T	G	0.0119227	0.000107824	0.00106117	1199334	4	URT	CCDC6	missense, variant, non, coding, transcript, exon
rs138394594	2	176973807	G	A	0.011911	-0.000109253	0.00107263	1563247	2	IGF1	HOXD11, AC009336.1, HOXD10	synonymous, variant, downstream, gene, non, coding, transcript, exon
rs2071561	17	39622068	G	T	0.0119078	0.000121444	0.00117664	2556899	4	HDL	KRT32, RNU2, 32P	missense, variant, upstream, gene
rs2303255	16	29706444	C	T	0.0119062	-0.000107086	0.00105498	1173269	3	IGF1	QPRT	intron, variant, non, coding, transcript, missense, upstream, gene
rs191193816	11	114442141	A	G	0.0119019	-0.000114798	0.00111966	2364188	8	HDL	NXPE4	missense, variant
rs11625337	14	23732091	G	A	0.0119001	0.000119739	0.00116222	977480	2	SHBG	C14orf164, RNU6, 1046P	intron, variant, upstream, gene, non, coding, transcript
rs112657916	6	127837357	A	G	0.0118991	0.000106383	0.00104931	334504	3	URA	SOGA3, C6orf58	synonymous, variant, downstream, gene, NMD, transcript, upstream
rs1061583	14	39644498	G	A	0.0118921	9.65043e-05	0.000972416	944351	2	VITD	PNN, TRAPPC6B, RP11, 407N17.4	synonymous, variant, upstream, gene, non, coding, transcript, exon
rs111928389	19	38980666	C	T	0.0118696	0.0001338	0.00129694	3236121	4	CAL	RYR1	intron, variant
rs35438647	6	88123549	G	A	0.0118545	-9.65498e-05	0.000968922	957570	2	IGF1	C6ORF165, C6orf165	non, coding, transcript, exon, variant, missense, NMD
rs116654270	2	99185177	T	G	0.0118518	0.000101314	0.00100796	170829	2	CAL	INPP4A	intron, variant, non, coding, transcript, upstream, gene
rs118104321	11	94245693	G	A	0.0118376	-0.000104648	0.0010383	1730909	3	ALT	LINC01171	upstream, gene, variant
rs115369848	1	38041223	G	A	0.0118013	-0.000115706	0.00113135	2015204	3	APOA	GNL2	synonymous, variant, upstream, gene, downstream
rs41281489	2	24484531	A	G	0.0117818	0.000106191	0.00105118	3015064	5	APOA	ITSN2	synonymous, variant
rs11569850	1	12164391	G	C	0.0117678	0.000118933	0.00116046	301272	2	DBP	TNFRSF8	intron, variant, NMD, transcript
rs114347935	19	35263554	A	G	0.0117471	0.00011903	0.00116189	480991	4	CAL	ZNF599	intron, variant, non, coding, transcript, exon
rs34923683	2	216245694	C	A	0.0117424	-0.000105958	0.00105022	4814328	2	URA	FN1	synonymous, variant, intron, non, coding, transcript, exon, downstream, gene
rs2860179	19	7184275	C	T	0.0117317	-0.000129651	0.00125512	3214372	4	IGF1	INSR	intron, variant, non, coding, transcript
rs146925326	23	110925461	C	T	0.0117243	-8.7703e-05	0.000897958	2326649	2	TRIG	ALG13	5, prime, UTR, variant, synonymous, non, coding, transcript, exon, splice, region, polypyrimidine, tract, intron
rs75243240	10	61824076	T	A	0.0117198	-0.000102865	0.00102471	3146371	3	ALP	ANK3, RP11, 388P9.2	intron, variant, downstream, gene, upstream
rs3213691	10	120070709	A	G	0.011706	-0.00010677	0.00105831	3859489	2	SBP	FAM204A	intron, variant, upstream, gene, non, coding, transcript, NMD
rs17111697	1	55631650	G	T	0.0116411	-0.000109134	0.00108073	4431746	2	CAL	USP24	intron, variant
rs1051484	6	105726036	C	T	0.0116289	0.000101899	0.00101929	3226306	2	IGF1	PREP, RP3, 355L5.4, 355L5.5	missense, variant, upstream, gene
rs13129869	4	7668967	C	T	0.0116267	-0.000111021	0.00109739	1696118	2	ALB	SORCS2	intron, variant
rs78912772	1	12779563	C	T	0.0116232	-0.000119014	0.00116658	3644269	2	ALT	AADACL3	intron, variant, synonymous
rs750625	8	41525914	C	T	0.011619	0.000102321	0.00102512	1169696	3	HBA1C	ANK1, RP11, 930P14.1	synonymous, variant, upstream, gene, 3, prime, UTR, NMD, transcript, downstream, non, coding, exon
rs897945	4	83838262	T	G	0.0115826	0.000102646	0.00102738	3651368	2	SHBG	THAP9, LIN54	missense, variant, 3, prime, UTR, NMD, transcript, intron, non, coding, downstream, gene
rs186927	2	44932572	T	C	0.0115519	0.000107918	0.00107355	886682	4	LDL	CAMKMT	intron, variant, non, coding, transcript
rs113012367	13	113242185	G	T	0.0115461	0.000105754	0.00105508	928696	2	LDL	TUBGCP3	intron, variant, non, coding, transcript, upstream, gene
rs35002732	1	161693199	C	T	0.0115268	-0.0001227	0.00120744	319683	8	TPROT	FCRLB	missense, variant, upstream, gene
rs111256849	12	117187907	T	C	0.011521	0.000115043	0.00113599	4092809	3	ALP	RNFT2	synonymous, variant, 3, prime, UTR, NMD, transcript
rs114351668	17	41984550	G	A	0.0115132	0.000111369	0.00110445	4154730	3	CREA	MPP2	intron, variant, 5, prime, UTR, non, coding, transcript, upstream, gene
rs35783198	3	142607767	C	T	0.0115073	0.000102242	0.00102617	703770	2	CREA	PCOLCE2	5, prime, UTR, variant, non, coding, transcript, exon, upstream, gene
rs78214260	3	37368758	T	C	0.0114757	-0.0001062	0.00106215	278864	2	GGT	GOLGA4	missense, variant, downstream, gene, intron, upstream
rs2853244	8	113529233	A	G	0.0114486	-9.25016e-05	0.000944954	3901445	2	HDL	CSMD3	intron, variant
rs3729767	19	19258656	G	A	0.0114468	0.000119569	0.00118095	114120	3	CHO	MEF2B, MEF2BNB	splice, polypyrimidine, tract, variant, intron, NMD, transcript, non, coding, downstream, gene
rs79484112	2	207173390	G	A	0.0114399	-0.000102703	0.00103223	4257976	2	URT	ZDBF2	missense, variant
rs1890680	10	98460669	G	A	0.0114358	-0.000112889	0.00112041	3239888	3	ALT	PIK3AP1	intron, variant, upstream, gene
rs2230388	2	99193496	C	T	0.0114287	0.000102463	0.0010308	1548896	3	TPROT	INPP4A	synonymous, variant, non, coding, transcript, exon
rs75898802	11	66314603	C	A	0.0114199	0.000117832	0.00116711	4680148	3	HDL	ZDHHC24, ACTN3	upstream, gene, variant, intron, NMD, transcript
rs74509822	2	170018935	T	C	0.011383	-0.00011011	0.00110004	70105	4	ALP	LRP2	intron, variant
rs2303967	1	92446398	A	T	0.0113744	0.000104368	0.00104884	2992660	3	GGT	BRDT	intron, variant, downstream, gene
rs6759555	2	75881828	T	C	0.0113732	-0.000103408	0.0010405	2661471	2	CREA	MRPL19, AC005034.3, GCFC2	intron, variant, upstream, gene, NMD, transcript
rs8342	4	88416223	G	A	0.0113653	-0.000103142	0.00104332	926593	3	ALT	SPARCL1	synonymous, variant, 5, prime, UTR
rs1050923	1	153517172	T	C	0.0113419	-0.000117244	0.00116225	1808613	5	GGT	S100A4, S100A5, S100A3	synonymous, variant, upstream, gene, downstream, non, coding, transcript, exon
rs117929248	15	62306244	C	T	0.0113409	-0.000107112	0.0010737	1399656	2	GGT	VPS13C	intron, variant
rs2369679	14	96922752	G	C	0.0112789	0.000111604	0.00111518	2134325	3	SHBG	AK7, RPL23AP10	missense, variant, downstream, gene
rs114025084	6	32154569	G	C	0.0112767	0.000116037	0.00115469	1433941	6	PHOS	GPSM3, PBX2, AGER, RNF5, XXbac, BPG300A18.13	downstream, gene, variant, intron, upstream, non, coding, transcript, exon
rs57295859	19	15490485	C	T	0.0112402	-0.000121592	0.00120492	3968243	2	SBP	AKAP8, AKAP8L, AC005785.2	intron, variant, downstream, gene, non, coding, transcript, upstream, exon, NMD
rs17230746	2	144194565	C	T	0.0112087	9.09273e-05	0.000938216	4431276	3	CREA	ARHGAP15, AC096558.1, RP11, 570L15.2	synonymous, variant, intron, non, coding, transcript, downstream, gene, exon
rs2257545	20	45003788	C	T	0.0111997	-0.000106864	0.00107661	1179846	2	CRP	ELMO2	intron, variant, downstream, gene, upstream, non, coding, transcript, NMD
rs2983288	20	23472391	G	A	0.0111927	0.000104654	0.00105747	2464902	3	IGF1	CST8	synonymous, variant
rs9384530	6	157488357	C	T	0.011182	9.95504e-05	0.00101323	4034803	7	APOB	ARID1B	intron, variant, non, coding, transcript
rs41264475	1	159277689	C	A	0.011175	-0.000111327	0.00111667	4403814	7	CRP	FCER1A	missense, variant
rs116651705	2	17953850	A	G	0.0111339	9.92439e-05	0.00101223	3515617	5	APOA	GEN1, SMC6	intron, variant, upstream, gene
rs61995998	14	105344872	C	T	0.0111024	0.000104267	0.00105682	2892012	4	GGT	CEP170B	intron, variant
rs843338	3	183911465	C	T	0.0110996	0.000107099	0.0010823	2393559	2	CAL	ABCF3, EIF2B5	synonymous, variant, intron, non, coding, transcript, exon, downstream, gene
rs10431213	12	21689882	T	A	0.0110508	-9.74433e-05	0.00100113	815321	8	TBIL	C12orf39, GYS2	downstream, gene, variant, 3, prime, UTR, intron, non, coding, transcript
rs141810038	19	43233397	A	T	0.0110479	0.000123403	0.00122492	1779243	9	APOB	PSG3	missense, variant, downstream, gene, intron, NMD, transcript
rs12572321	10	18430220	G	A	0.0110382	0.000107337	0.00108913	166962	7	AST	CACNB2	intron, variant, non, coding, transcript
rs11556165	2	27438615	G	C	0.011032	-0.000108186	0.0010948	1467064	5	IGF1	CAD, SLC5A6, ATRAID	upstream, gene, variant, missense, downstream
rs77550984	12	113530896	G	A	0.0110312	0.000101409	0.0010346	1726173	2	DBP	DTX1	intron, variant, upstream, gene, non, coding, transcript
rs5996153	22	42793873	A	G	0.011029	-0.000109698	0.00110795	3020540	2	GGT	NFAM1	synonymous, variant
rs6668857	1	156354367	G	A	0.011019	-0.000116772	0.00117284	1028582	5	GGT	RHBG, RP11, 139I14.2	synonymous, variant, 3, prime, UTR, NMD, transcript, missense, upstream, gene, downstream, non, coding, exon
rs10995079	10	63953973	C	T	0.0110181	9.87776e-05	0.00101196	3600615	4	URT	RTKN2	intron, variant, 3, prime, UTR
rs758596	17	59544863	G	A	0.0109967	-0.000101933	0.00104059	1588349	2	TPROT	TBX4, RP11, 15K2.2	splice, region, variant, polypyrimidine, tract, intron, non, coding, transcript, upstream, gene
rs41282391	4	76730201	G	A	0.010993	0.000100138	0.00102399	3796013	6	VITD	USO1	synonymous, variant, downstream, gene
rs17311045	11	117647496	C	T	0.0109906	-0.000104274	0.00106133	1084932	2	CHO	DSCAML1	intron, variant, downstream, gene
rs181919774	1	42975790	G	A	0.010976	0.000106021	0.00107733	2919363	2	HDL	CCDC30	intron, variant, NMD, transcript, non, coding
rs61757101	3	124567347	C	T	0.0109726	-0.000105712	0.00107475	1264665	2	HBA1C	ITGB5	synonymous, variant, 3, prime, UTR, NMD, transcript, upstream, gene
rs41306852	10	98115019	G	A	0.010956	0.000107505	0.00109113	3585538	3	ALT	OPALIN	missense, variant, intron, 5, prime, UTR
rs112445319	4	100870934	G	A	0.0109231	-9.2348e-05	0.00095882	987649	2	IGF1	H2AFZ, DNAJB14, RP11, 15B17.1	intron, variant, upstream, gene, non, coding, transcript, exon
rs72805186	5	156514189	G	A	0.0108911	9.37543e-05	0.000972604	33057	3	CHO	HAVCR2	missense, variant
rs189886164	1	19970888	G	T	0.0108629	-0.000109418	0.00111192	3732138	3	GGT	NBL1, MINOS1	intron, variant, 5, prime, UTR, upstream, gene, NMD, transcript
rs149003420	1	151378274	G	A	0.010836	-0.000111432	0.00113113	3947511	5	GGT	POGZ, PSMB4	synonymous, variant, downstream, gene, non, coding, transcript, exon
rs79485806	19	50243171	C	T	0.0108212	0.000118013	0.00119092	4754639	6	APOA	TSKS	synonymous, variant, non, coding, transcript, exon
rs149937992	17	7290638	A	G	0.0108183	0.000125144	0.00126019	4411	15	SHBG	TNK1, TMEM256, PLSCR3, C17orf61	intron, variant, downstream, gene
rs76102746	20	45130454	C	T	0.0108098	-0.000104685	0.00107152	1306512	3	APOA	ZNF334	synonymous, variant, downstream, gene
rs894189	19	45206695	G	A	0.0108037	-0.00011827	0.00119397	116765	7	CRP	CEACAM16, CTB, 171A8.1	synonymous, variant, intron, non, coding, transcript
rs78702572	12	125451838	G	A	0.0107934	0.000105881	0.00108289	4171122	3	ALP	DHX37	intron, variant, non, coding, transcript, upstream, gene
rs56193661	5	43656024	T	C	0.010792	9.5933e-05	0.000994385	4159440	2	CREA	NNT	synonymous, variant, downstream, gene
rs901886	19	10402131	T	C	0.0107876	-0.000119316	0.00120589	3484	4	IGF1	ICAM5, ICAM1, ICAM4, CTD, 2369P2.8	intron, variant, downstream, gene, non, coding, transcript, upstream
rs3793927	10	74268031	C	T	0.0107844	0.000105273	0.00107727	2483224	10	HBA1C	MICU1	splice, region, variant, polypyrimidine, tract, intron, NMD, transcript, non, coding, exon
rs2164808	2	25377176	C	T	0.0107836	-0.000105206	0.00107737	594375	5	IGF1	EFR3B, RP11, 509E16.1	synonymous, variant, upstream, gene
rs139357095	4	5894398	C	G	0.0107431	-0.000101285	0.00104375	78451	2	GGT	CRMP1	missense, variant, upstream, gene
rs35708572	10	70045157	G	A	0.0107422	0.000104953	0.00107621	1654037	10	HBA1C	PBLD	downstream, gene, variant, synonymous, intron
rs111663130	16	55736864	T	C	0.010729	9.50808e-05	0.000988883	4461140	3	CRP	SLC6A2	intron, variant, 3, prime, UTR, downstream, gene
rs17807723	15	90023558	G	A	0.0107247	0.000101464	0.00104595	788782	3	SBP	RHCG	missense, variant, intron, NMD, transcript, 3, prime, UTR, upstream, gene
rs6711022	2	99449536	A	G	0.0106559	9.59167e-05	0.000999061	1292856	3	TPROT	KIAA1211L	intron, variant, non, coding, transcript
rs147555918	11	3129103	G	A	0.0106315	-0.000103313	0.00106595	372745	4	ALP	OSBPL5	missense, variant, intron, NMD, transcript, non, coding, exon
rs11544786	4	71888176	C	T	0.0106288	9.87267e-05	0.00102438	1046012	6	VITD	DCK, MOB1B	synonymous, variant, 3, prime, UTR, NMD, transcript, upstream, gene, downstream
rs2817760	10	69905300	G	A	0.0106156	9.15252e-05	0.000960997	4934853	3	ALP	MYPN	intron, variant
rs16923154	12	20885931	A	G	0.0106092	-9.54151e-05	0.00100195	423944	8	TBIL	SLCO1C1	synonymous, variant, 3, prime, UTR, NMD, transcript
rs7593452	2	167322522	G	A	0.0106061	-9.58473e-05	0.000999962	1776556	3	TRIG	SCN7A	intron, variant, NMD, transcript, upstream, gene
rs2279587	5	52214581	G	A	0.0105852	-8.42312e-05	0.000898038	1021994	2	GGT	ITGA1	missense, variant, non, coding, transcript, exon
rs77415909	16	57103903	C	T	0.0105835	-0.000102023	0.00105684	780452	3	AST	NLRC5	intron, variant, NMD, transcript, upstream, gene
rs752641	1	156352013	T	C	0.0105771	0.000110202	0.00113073	1026228	5	GGT	RHBG	intron, variant, NMD, transcript, non, coding, exon, upstream, gene, missense
rs147282209	17	55918660	T	C	0.0105679	-9.72709e-05	0.00101396	2037854	2	TPROT	MRPS23	intron, variant
rs139007552	2	209189105	G	A	0.0105671	-9.45434e-05	0.000989547	2242261	3	CREA	PIKFYVE	intron, variant, NMD, transcript
rs2270981	17	7216540	G	A	0.0105497	-0.000123521	0.00126169	355007	15	SHBG	RP11, 542C16.2, NEURL4, EIF5A, GPS2	3, prime, UTR, variant, NMD, transcript, downstream, gene, synonymous, non, coding, exon
rs61788520	1	116655272	C	T	0.010517	-0.000103851	0.00107527	3426279	3	CREA	MAB21L3	synonymous, variant
rs78697355	17	78111114	C	T	0.0105119	-0.000104536	0.00108154	456601	6	HBA1C	EIF4A3	intron, variant, upstream, gene, downstream, non, coding, transcript, exon
rs1861939	3	170198967	A	G	0.0104849	8.77625e-05	0.000932227	1811329	3	IGF1	SLC7A14, CLDN11	splice, polypyrimidine, tract, variant, intron, non, coding, transcript
rs10098992	8	118831856	C	A	0.0104795	-8.30877e-05	0.000890464	1401178	2	APOA	EXT1	intron, variant, NMD, transcript
rs7463174	8	37635649	A	G	0.010441	-8.95318e-05	0.000949338	2720569	3	HBA1C	PROSC	3, prime, UTR, variant, downstream, gene
rs17003955	23	108868153	G	A	0.0104261	7.59405e-05	0.000829349	269341	2	LDL	KCNE1L, ACSL4	missense, variant, intron, non, coding, transcript, downstream, gene
rs76492178	21	37408491	G	C	0.0103806	-9.98127e-05	0.00104406	121767	3	IGF1	SETD4, AP000688.1	missense, variant, non, coding, transcript, exon, intron
rs1800927	6	10415307	C	G	0.0103794	-9.52825e-05	0.00100264	3040511	3	URT	TFAP2A, AS1	intron, variant, 5, prime, UTR, upstream, gene, non, coding, transcript, splice, region, polypyrimidine, tract, downstream, NMD
rs41277753	9	107288995	A	G	0.010376	8.90541e-05	0.000946821	389178	5	CHO	OR13C4	missense, variant
rs4149179	11	62782446	C	T	0.0103717	-0.000105866	0.00109946	1454531	7	URT	SLC22A8	upstream, gene, variant, 5, prime, UTR, splice, polypyrimidine, tract, intron, non, coding, transcript, exon
rs16977629	15	57925836	C	T	0.0103688	-9.40143e-05	0.000991583	3990175	2	CREA	MYZAP, GCOM1, POLR2M	missense, variant, 5, prime, UTR, NMD, transcript, upstream, gene
rs28461628	8	120940867	G	A	0.0103686	-8.28732e-05	0.000891676	2988444	2	HBA1C	DEPTOR	intron, variant
rs883079	12	114793240	T	C	0.0103681	-9.67094e-05	0.00101598	2988517	4	HDL	TBX5	3, prime, UTR, variant
rs41274090	10	68139039	G	A	0.0103535	8.85886e-05	0.000943128	3168592	3	TBIL	CTNNA3	missense, variant
rs78732262	19	11095896	T	C	0.0103432	-0.000110832	0.00114657	426346	2	SBP	SMARCA4	intron, variant, non, coding, transcript
rs61729114	3	49946812	G	A	0.0103346	9.34278e-05	0.000987771	4010207	2	AST	MON1A, CTD, 2330K9.3	synonymous, variant, downstream, gene, intron, non, coding, transcript, exon
rs337589	9	101496508	G	A	0.0103235	9.1791e-05	0.000972975	2494890	2	ALP	ANKS6	3, prime, UTR, variant, intron
rs848217	1	16272250	A	G	0.0103099	0.000104851	0.0010943	430644	3	GGT	ZBTB17	synonymous, variant, upstream, gene, non, coding, transcript, exon, downstream
rs62396221	6	26285748	C	A	0.0103098	9.05148e-05	0.000962134	418779	4	HBA1C	HIST1H4H	5, prime, UTR, variant, upstream, gene
rs118056606	15	74473111	G	A	0.0102755	-9.58257e-05	0.00101139	512560	3	GGT	ISLR, STRA6, RP11, 665J16.1	downstream, gene, variant, intron, non, coding, transcript, upstream
rs183291309	8	24208680	G	A	0.0102407	9.98599e-05	0.00104907	4255481	3	HDL	ADAM28, RP11, 624C23.1	intron, variant, non, coding, transcript, NMD, downstream, gene
rs140613830	20	36531751	C	G	0.010213	9.90368e-05	0.00104313	3376769	3	APOB	VSTM2L	5, prime, UTR, variant
rs41281037	9	104189728	C	T	0.0101398	-8.99139e-05	0.000962197	198330	2	ALP	ALDOB	intron, variant, non, coding, transcript
rs783959	4	98893476	C	T	0.010125	8.51516e-05	0.000919354	4531485	2	APOA	STPG2	synonymous, variant
rs61761209	1	109810183	C	T	0.0101239	0.000105316	0.00110916	3418810	3	CREA	CELSR2	synonymous, variant, downstream, gene, upstream
rs4679322	3	126735301	A	G	0.0101082	9.83263e-05	0.00104042	3965099	5	CAL	PLXNA1	intron, variant
rs74777743	3	170802157	A	G	0.0101016	-8.37718e-05	0.000907648	1208139	3	IGF1	TNIK	intron, variant, upstream, gene, non, coding, transcript
rs61734091	1	39494426	C	T	0.0101005	-9.64131e-05	0.00102329	562001	2	HDL	NDUFS5	synonymous, variant
rs597371	10	116032519	A	G	0.010098	-9.07737e-05	0.000973907	178701	2	DBP	VWA2	non, coding, transcript, exon, variant, missense
rs147282818	11	65811100	C	T	0.010045	0.000100473	0.00106315	3597690	4	GGT	GAL3ST3	synonymous, variant, downstream, gene
rs6714975	2	71633389	T	C	0.0100358	-8.84357e-05	0.000952175	1586968	2	CREA	ZNF638	synonymous, variant, upstream, gene, non, coding, transcript, exon
rs16951370	18	47518652	A	G	0.0100331	-9.22793e-05	0.000993447	76709	6	APOA	MYO5B	splice, donor, region, variant, intron
rs41314485	10	119043295	C	T	0.0100329	8.94746e-05	0.000961748	2832075	4	HDL	SLC18A2, PDZD8	downstream, gene, variant, synonymous
rs35521695	4	86916056	C	G	0.010029	8.33326e-05	0.000905296	1939843	2	URT	ARHGAP24	missense, variant
rs740698	17	60767151	T	C	0.0100277	-9.29599e-05	0.00099408	1265421	3	IGF1	MRC2	intron, variant, non, coding, transcript
rs2229498	10	70856852	A	G	0.0100274	0.000106205	0.0011334	927955	10	HBA1C	SRGN	missense, variant, intron, non, coding, transcript
rs61732498	16	3139310	G	C	0.0100111	0.000101832	0.001077	459937	5	IGF1	ZSCAN10, RNU1, 22P, RP11, 473M20.9	missense, variant, downstream, gene, upstream
rs73988752	17	32962004	C	T	0.00999083	-9.46574e-05	0.0010111	4867816	3	CREA	TMEM132E	synonymous, variant, upstream, gene
rs10402747	19	45815248	T	C	0.00997497	0.000109781	0.00115339	4286288	3	ALB	CKM	intron, variant
rs36068997	19	54848986	C	T	0.00996817	-0.000109294	0.00114918	410932	2	AST	LILRA4, AC008984.2	intron, variant, downstream, gene, upstream
rs2037753	7	76984572	G	A	0.00996055	-8.10887e-05	0.000887597	1459797	3	CREA	GSAP	synonymous, variant, non, coding, transcript, exon
rs2305274	3	145788803	T	C	0.00995392	8.52485e-05	0.000925642	3884806	2	CREA	PLOD2, AC107021.1, RP11, 274H2.2, 274H2.3	intron, variant, downstream, gene, non, coding, transcript, upstream
rs76791219	12	124281322	T	C	0.00995211	-9.66898e-05	0.00103097	3264475	5	CRP	DNAH10	synonymous, variant, non, coding, transcript, exon
rs34001235	17	66887675	C	T	0.00994249	-9.21069e-05	0.000989268	3068453	3	SHBG	ABCA8	synonymous, variant, non, coding, transcript, exon, downstream, gene
rs77374532	4	70800377	A	G	0.00992761	9.10983e-05	0.000979728	2133811	6	VITD	CSN1S1	intron, variant, upstream, gene
rs3127106	10	115405615	C	T	0.00990832	8.77398e-05	0.000950464	805605	2	DBP	NRAP	missense, variant
rs8124843	20	44839203	C	G	0.00990357	-9.49928e-05	0.00101753	1015261	5	HDL	CDH22	splice, region, variant, polypyrimidine, tract, intron, non, coding, transcript
rs76748392	5	36035727	A	G	0.00989899	8.35932e-05	0.000912241	4275236	2	URA	UGT3A2	3, prime, UTR, variant, NMD, transcript, downstream, gene
rs77846676	8	22782663	A	T	0.00989721	-9.60434e-05	0.00102712	2829464	3	HDL	PEBP4	intron, variant, non, coding, transcript, downstream, gene
rs6773904	3	57419497	C	T	0.00988478	8.79539e-05	0.000953838	1055105	4	AST	DNAH12	missense, variant
rs344560	19	6665020	C	T	0.00986096	-0.000106605	0.00112861	3733627	4	IGF1	TNFSF14	missense, variant
rs6063143	20	46365359	T	C	0.00981966	-9.41882e-05	0.00101383	2541417	3	APOA	SULF2	intron, variant, non, coding, transcript
rs111567425	11	113107077	G	A	0.00981334	9.14923e-05	0.000988297	3455487	2	CHO	NCAM1	intron, variant, non, coding, transcript, upstream, gene, downstream, NMD
rs12613075	2	175677022	C	T	0.00979995	-8.70529e-05	0.000947522	2860032	2	IGF1	CHN1	intron, variant, NMD, transcript, downstream, gene, non, coding, exon
rs41284360	10	116702358	C	T	0.00979114	-8.7785e-05	0.000954527	491138	2	SBP	TRUB1	intron, variant, non, coding, transcript
rs2289888	8	120613747	C	T	0.00977047	8.12216e-05	0.000894556	95076	3	ALP	ENPP2	intron, variant
rs999813	19	18368810	G	T	0.00975996	-0.000101021	0.00108016	1037841	2	SHBG	PDE4C, KIAA1683	upstream, gene, variant, missense, non, coding, transcript, exon
rs1143390	1	153233701	A	C	0.00975739	0.000100651	0.00107686	2092084	5	GGT	LOR	synonymous, variant
rs75375525	18	72593097	G	A	0.00975445	-7.89112e-05	0.000873755	2438125	2	URA	ZNF407	intron, variant, non, coding, transcript
rs118086824	17	47022225	C	T	0.00973403	9.15306e-05	0.000992366	303995	5	SHBG	SNF8, RNU1, 42P	upstream, gene, variant, downstream, 5, prime, UTR
rs17025562	1	110775195	C	T	0.00972966	-9.02603e-05	0.00097978	364806	4	CHO	KCNC4	3, prime, UTR, variant, intron, non, coding, transcript, NMD
rs45617640	19	50208627	C	T	0.00972888	-0.000104954	0.00111893	4798789	4	TRIG	CPT1C	intron, variant, non, coding, transcript, downstream, gene, upstream, NMD
rs45507399	10	17188450	C	T	0.00971448	-9.10156e-05	0.000989818	1074808	7	AST	TRDMT1	downstream, gene, variant, 3, prime, UTR, NMD, transcript
rs10740579	10	56077209	A	G	0.00968669	-8.11053e-05	0.000896088	2570190	2	CREA	PCDH15	splice, region, variant, polypyrimidine, tract, intron, NMD, transcript, non, coding
rs151266984	1	27332637	T	G	0.00968343	9.16324e-05	0.000994586	46348	2	SHBG	FAM46B	missense, variant
rs12971578	19	14218492	C	G	0.00967801	-0.000104688	0.00111899	3840653	4	IGF1	PRKACA	intron, variant, non, coding, transcript, upstream, gene
rs111507842	6	37254947	A	T	0.00967623	-9.71296e-05	0.00104687	4401841	4	CREA	TBC1D22B	intron, variant
rs144860491	2	18768191	C	T	0.0096758	8.19356e-05	0.000904094	2701276	2	TRIG	NT5C1B, RNU6, 1215P, RDH14	intron, variant, upstream, gene, NMD, transcript, non, coding, exon
rs17854013	17	8701799	G	T	0.00966153	0.000106081	0.00113181	1415572	15	SHBG	PIK3R6, MFSD6L	downstream, gene, variant, missense
rs139064918	6	109416393	G	C	0.00966137	8.18549e-05	0.000903795	464051	2	IGF1	CEP57L1, SESN1	5, prime, UTR, variant, upstream, gene, non, coding, transcript, exon
rs79232673	16	69969917	G	A	0.00965816	8.67891e-05	0.000949956	1825596	2	APOB	WWP2, MIR140	intron, variant, downstream, gene, non, coding, transcript, upstream
rs116317850	1	156594347	C	T	0.00963135	9.58976e-05	0.00103694	1654388	4	SHBG	HAPLN2	intron, variant, downstream, gene, non, coding, transcript
rs11734353	4	90171147	G	C	0.00963128	8.26381e-05	0.000912083	2681517	3	ALT	GPRIN3	missense, variant
rs4764971	12	100631797	A	G	0.00961759	-8.93694e-05	0.000975607	2528581	5	IGF1	DEPDC4, ACTR6	3, prime, UTR, variant, NMD, transcript, downstream, gene, non, coding, exon, intron
rs4988513	3	187387896	T	C	0.00961537	9.08006e-05	0.000989267	1082872	2	CAL	SST	intron, variant
rs142406250	15	42115479	C	A	0.00958493	-8.42041e-05	0.00092822	3520397	3	CREA	MAPKBP1, JMJD7, PLA2G4B, RP11, 23P13.4	intron, variant, upstream, gene, downstream, non, coding, transcript, NMD
rs2509147	11	69949327	C	T	0.0095738	-9.09769e-05	0.000992401	1212305	3	VITD	ANO1	intron, variant, upstream, gene
rs10913563	1	178483231	G	A	0.00955591	-8.30594e-05	0.000918738	1472144	4	IGF1	TEX35	intron, variant, missense, NMD, transcript
rs4683269	3	46717492	G	C	0.0095542	8.52729e-05	0.000939759	780887	2	AST	ALS2CL	intron, variant, 3, prime, UTR, NMD, transcript, upstream, gene, non, coding
rs2287931	5	75954222	T	C	0.00954765	-8.66239e-05	0.000954212	3525289	4	ALB	IQGAP2	intron, variant, non, coding, transcript
rs7533060	1	24416070	C	G	0.00951442	-9.19444e-05	0.00100418	2870219	3	IGF1	MYOM3, RP11, 293P20.2	synonymous, variant, downstream, gene, non, coding, transcript, exon
rs4074420	6	24806752	C	A	0.00951374	8.39801e-05	0.000932361	101979	8	ALP	FAM65B	intron, variant
rs2306986	4	100504575	G	C	0.00951009	-7.90213e-05	0.000882299	2920386	2	APOA	MTTP	missense, variant, 3, prime, UTR, NMD, transcript, downstream, gene
rs148818002	15	43571463	G	A	0.00950111	8.52674e-05	0.000941769	1467378	2	IGF1	TGM7	missense, variant, upstream, gene
rs2037391	3	46539523	G	A	0.00949897	-8.48438e-05	0.000938546	3209326	3	HBA1C	RTP3	5, prime, UTR, variant
rs1351691	7	50070921	G	C	0.00948779	8.46728e-05	0.000936003	3697531	3	IGF1	ZPBP	splice, polypyrimidine, tract, variant, intron, non, coding, transcript
rs10995311	10	64564934	C	G	0.00948644	8.28848e-05	0.000919222	4211576	4	URT	ADO, RP11, 436D10.3	missense, variant, intron, non, coding, transcript
rs2297727	1	16382086	C	T	0.00948457	-9.49252e-05	0.00103429	41746	2	ALT	FAM131C, CLCNKB	downstream, gene, variant, intron
rs13296	6	44218120	G	A	0.00948288	9.44599e-05	0.00102941	2561332	4	CREA	HSP90AB1, SLC35B2, MIR4647	synonymous, variant, downstream, gene
rs551499157	15	90195811	G	C	0.00947148	-8.79214e-05	0.000967457	616529	3	SBP	KIF7	intron, variant, NMD, transcript
rs140117800	19	57752223	C	T	0.00946726	-0.000103161	0.00111394	3297413	3	APOA	ZNF805	5, prime, UTR, variant, upstream, gene
rs4682893	3	43596998	A	C	0.00946427	8.41105e-05	0.000931578	2339607	2	AST	ANO10	intron, variant, upstream, gene
rs76852171	3	142266778	A	T	0.00946345	-8.13141e-05	0.000905857	362781	3	URT	ATR	intron, variant
rs9919552	11	111959625	C	T	0.00942304	-8.77908e-05	0.000967413	4764969	6	TRIG	C11orf57, SDHD, TIMM8B	downstream, gene, variant, synonymous, upstream, non, coding, transcript, exon, intron, NMD
rs113298491	19	19745765	A	G	0.00941009	-9.58305e-05	0.00104674	441455	3	LDL	GMIP	intron, variant, non, coding, transcript, downstream, gene
rs12939821	17	62079286	G	A	0.00940444	8.81274e-05	0.000973253	46714	3	IGF1	C17orf72, ICAM2, RP11, 214C8.2	non, coding, transcript, exon, variant, 3, prime, UTR, downstream, gene, missense, upstream
rs2159557	17	64173170	A	G	0.00940083	-8.72031e-05	0.000965011	2140598	3	IGF1	CEP112	intron, variant, non, coding, transcript
rs7205989	16	88778615	A	G	0.00939888	-9.71118e-05	0.00106469	1733185	4	HBA1C	PIEZO1, CTU2, MIR4722	downstream, gene, variant, intron, upstream, NMD, transcript, non, coding, missense
rs141503948	10	116038515	G	A	0.00939817	-8.27906e-05	0.0009218	172705	2	SBP	VWA2	non, coding, transcript, exon, variant, synonymous
rs3026489	12	110784578	T	C	0.00939105	-8.54165e-05	0.000946743	1020145	3	TBIL	ATP2A2	intron, variant, non, coding, transcript, exon, 3, prime, UTR, NMD, downstream, gene
rs73517878	9	107549291	G	A	0.00938467	-7.96204e-05	0.000894802	140883	6	HDL	ABCA1	intron, variant
rs34562585	2	179587552	T	C	0.00937278	8.43944e-05	0.000937489	4405413	2	HBA1C	TTN, AS1, RP11, 171I2.1	intron, variant, synonymous, non, coding, transcript, upstream, gene
rs935172	2	26804247	C	T	0.00936654	8.71285e-05	0.000964563	2390453	3	HBA1C	CIB4, C2orf70	missense, variant, downstream, gene, non, coding, transcript, exon
rs184047772	2	209010823	A	T	0.00936573	8.11987e-05	0.000907462	2420543	2	URT	CRYGB	intron, variant
rs61741828	6	127836860	G	A	0.00936214	-8.5061e-05	0.000944384	4470175	3	PHOS	SOGA3, C6orf58	synonymous, variant, downstream, gene, NMD, transcript, upstream
rs190067054	10	101373199	A	G	0.00934332	9.06923e-05	0.000999459	565716	3	AST	SLC25A28	intron, variant, downstream, gene, non, coding, transcript
rs11060	6	161173946	G	T	0.00934322	-8.34231e-05	0.000934951	349214	6	CHO	PLG	synonymous, variant, non, coding, transcript, exon, downstream, gene
rs4801798	19	49930786	C	A	0.00933983	-0.000103016	0.00111916	170750	3	ALB	SLC17A7, PTH2, GFY	downstream, gene, variant, upstream, missense
rs73552781	16	57707249	C	T	0.00933311	-8.89223e-05	0.000981163	543101	5	APOA	GPR97	5, prime, UTR, variant, synonymous, non, coding, transcript, exon, NMD
rs3755176	2	39507417	A	T	0.00932674	8.30073e-05	0.00092596	4179687	3	DBP	MAP4K3, SNORA67	synonymous, variant, upstream, gene, downstream
rs3763792	10	101120787	T	C	0.00932394	9.99151e-05	0.00110189	818128	3	AST	CNNM1	intron, variant
rs1046166	22	33673125	C	T	0.00931965	-9.05019e-05	0.000997921	3832641	2	HBA1C	LARGE	missense, variant, intron
rs10112019	8	74463797	C	T	0.00931457	-7.5261e-05	0.000853096	1989230	3	URT	STAU2	3, prime, UTR, variant, downstream, gene, intron
rs13044734	20	23669451	G	A	0.00931061	7.23542e-05	0.000826017	1553503	4	ALP	CST4	synonymous, variant
rs2232607	20	36993333	A	G	0.00930922	8.407e-05	0.00093674	3245925	2	CREA	LBP	missense, variant
rs78646354	12	21168582	A	G	0.00929644	7.91441e-05	0.000891305	294021	8	TBIL	LST3, SLCO1B7, SLCO1B3	intron, variant, upstream, gene
rs77071545	8	121518928	A	C	0.00929611	7.65358e-05	0.000865796	810105	3	ALP	MTBP	intron, variant
rs113876752	2	25872865	T	C	0.00929366	8.59532e-05	0.000955349	1459071	3	HBA1C	DTNB	intron, variant, NMD, transcript, upstream, gene, non, coding
rs61756695	1	85655931	C	T	0.00928974	8.48817e-05	0.000947286	3797807	3	GGT	SYDE2	non, coding, transcript, exon, variant, missense
rs73193453	12	109210945	G	A	0.00928267	9.4616e-05	0.00105253	2593778	4	HDL	SSH1	splice, polypyrimidine, tract, variant, intron, non, coding, transcript, exon, NMD
rs41292638	10	115639460	T	A	0.00927575	8.18906e-05	0.000918271	571760	2	SBP	NHLRC2	splice, donor, region, variant, intron
rs3744352	17	37262059	C	T	0.00926107	8.68462e-05	0.000965335	567761	3	CREA	PLXDC1, CTD, 2206N4.4	intron, variant, non, coding, transcript, downstream, gene, NMD
rs2229910	15	88576185	G	C	0.00925801	-8.64564e-05	0.000961509	2236155	3	SBP	NTRK3	synonymous, variant, upstream, gene, non, coding, transcript, exon
rs117430146	22	41998660	G	C	0.00925568	-9.15385e-05	0.00101066	2265834	4	ALT	DESI1	intron, variant, non, coding, transcript, exon, upstream, gene, downstream
rs143060134	10	18828191	C	T	0.00925066	8.91217e-05	0.000993308	564933	7	AST	CACNB2, RP11, 499P20.2	synonymous, variant, non, coding, transcript, exon, downstream, gene
rs17115206	11	113102355	C	A	0.00924825	-8.75402e-05	0.000972116	3703974	8	APOA	NCAM1	splice, polypyrimidine, tract, variant, intron, non, coding, transcript, upstream, gene, exon
rs574408551	11	66512395	T	C	0.0092473	8.96247e-05	0.000992559	4877940	2	ALP	C11orf80	splice, donor, 5th, base, variant, intron, upstream, gene, non, coding, transcript, NMD
rs71329284	3	122313732	A	G	0.00923644	9.31529e-05	0.00103306	456470	5	CAL	PARP15	intron, variant, non, coding, transcript
rs61757604	2	39095403	C	T	0.00923628	8.20753e-05	0.0009203	4591701	3	DBP	DHX57	missense, variant, intron, upstream, gene, non, coding, transcript, exon
rs7622799	3	169098992	G	A	0.00923533	7.53258e-05	0.000856479	2911304	3	IGF1	MECOM	non, coding, transcript, exon, variant, downstream, gene, missense
rs174452	11	61645892	G	A	0.00921719	-9.10399e-05	0.00101047	11437	2	TPROT	FADS3	intron, variant, non, coding, transcript, upstream, gene, downstream
rs6451173	5	34840841	G	A	0.0092039	7.97583e-05	0.000899875	4655743	2	CREA	TTC23L, CTD, 2517O10.6	missense, variant, NMD, transcript, non, coding, exon, upstream, gene
rs56166910	19	52223180	A	G	0.0092032	-0.000101859	0.00111392	2231630	3	APOA	HAS1	intron, variant, upstream, gene, start, lost
rs319013	5	41382681	T	G	0.00920152	-7.66331e-05	0.000869653	1071718	2	URA	PLCXD3	intron, variant
rs77901899	1	62737125	T	C	0.00919768	8.48377e-05	0.000949821	3483367	8	CRP	KANK4	intron, variant
rs17840265	6	108487936	C	T	0.0091864	7.7089e-05	0.000874435	464406	2	IGF1	NR2E1, OSTM1	upstream, gene, variant, 5, prime, UTR
rs113509238	16	31426131	G	A	0.0091592	-7.87147e-05	0.000891521	2892956	3	IGF1	ITGAD	intron, variant
rs2434483	11	43964569	C	T	0.0091544	-7.02865e-05	0.000811421	3450284	2	SBP	C11orf96, RP11, 613D13.8, 613D13.4	missense, variant, downstream, gene, intron, non, coding, transcript
rs138762595	4	69519875	G	A	0.00914958	-7.79354e-05	0.000884229	295849	3	GGT	UGT2B15	missense, variant
rs750155	16	28620572	C	T	0.00914725	-7.83683e-05	0.000888039	87397	3	IGF1	SULT1A1	intron, variant, 5, prime, UTR, NMD, transcript, non, coding, exon, upstream, gene
rs10882640	10	97369939	C	T	0.0091352	-8.74473e-05	0.000975829	4568976	3	ALT	ALDH18A1	intron, variant, downstream, gene
rs6762112	3	122060274	A	C	0.00913149	-9.33744e-05	0.00104183	709928	5	CAL	CSTA	splice, polypyrimidine, tract, variant, intron, downstream, gene
rs2290134	3	42251263	C	T	0.00913027	8.06812e-05	0.000910766	3685342	2	AST	TRAK1	synonymous, variant, non, coding, transcript, exon
rs61870095	10	116232959	C	T	0.00912932	-7.95026e-05	0.000899423	21739	2	DBP	ABLIM1	intron, variant, NMD, transcript, upstream, gene
rs3816196	2	190640475	G	A	0.00911139	7.20346e-05	0.00082903	1589622	2	GGT	ORMDL1, AC013468.1	intron, variant, downstream, gene, upstream
rs3134609	10	61834156	G	A	0.00908815	7.50632e-05	0.000857921	3126376	2	SHBG	ANK3	synonymous, variant, intron
rs482356	11	59570268	C	T	0.00906616	8.72834e-05	0.000977146	2064187	2	LDL	STX3, MRPL16	downstream, gene, variant, 3, prime, UTR
rs72739669	15	41794176	G	A	0.00906216	-8.04312e-05	0.000910778	309909	2	IGF1	ITPKA, LTK	intron, variant, downstream, gene, non, coding, transcript
rs1147990	1	55182300	A	T	0.00903562	8.49542e-05	0.000955918	356537	5	APOB	TTC4, MROH7	missense, variant, non, coding, transcript, exon, stop, lost, NMD, 3, prime, UTR
rs148544164	18	76418229	C	T	0.00902791	-7.19476e-05	0.000830468	1387007	2	CREA	.	intergenic, variant
rs117713193	11	117263874	C	T	0.00902574	-8.34326e-05	0.000941445	32085	6	TRIG	CEP164	intron, variant, downstream, gene, non, coding, transcript
rs10917671	1	163038853	G	A	0.00901378	-9.02487e-05	0.00100734	4257372	8	CRP	RGS4	upstream, gene, variant, intron, non, coding, transcript
rs61753715	8	80677527	A	G	0.00900594	-7.1499e-05	0.000827112	4224500	3	URT	HEY1, RP11, 26J3.1, 27N21.3	missense, variant, non, coding, transcript, exon, downstream, gene, upstream
rs1395949	2	25656880	G	C	0.009004	-7.7386e-05	0.000882976	4187413	5	APOB	DTNB	splice, polypyrimidine, tract, variant, intron, NMD, transcript, non, coding
rs61732805	1	155408636	G	T	0.00900175	-8.8677e-05	0.000993442	82851	2	URA	ASH1L, POU5F1P4	synonymous, variant, downstream, gene
rs149930769	1	43291416	C	T	0.00900048	-8.55703e-05	0.000962995	3234989	3	SHBG	ERMAP	upstream, gene, variant, splice, region, intron, non, coding, transcript, exon
rs55984047	5	43704542	C	G	0.00898983	7.08715e-05	0.000822201	2379551	2	IGF1	NNT	3, prime, UTR, variant, NMD, transcript
rs61748312	10	50376004	A	G	0.00896879	7.38966e-05	0.000850945	3131015	2	URT	C10orf128	missense, variant, NMD, transcript, non, coding, exon, upstream, gene
rs335609	5	76747087	C	T	0.00896534	-7.95484e-05	0.000905593	4318154	3	AST	WDR41	intron, variant, non, coding, transcript, downstream, gene, NMD
rs146409437	2	47797062	G	A	0.00896403	7.9749e-05	0.000907605	3751172	4	APOB	KCNK12, AC138655.1	intron, variant, non, coding, transcript, upstream, gene
rs17505733	4	152096755	C	T	0.00894708	7.26583e-05	0.00084072	3085624	2	ALP	SH3D19	5, prime, UTR, variant, upstream, gene, downstream, non, coding, transcript, exon
rs140461317	23	111698895	G	A	0.00894671	-6.31145e-05	0.000749457	3100083	2	CHO	ZCCHC16	3, prime, UTR, variant
rs147422041	17	61315209	C	T	0.00894588	-8.01136e-05	0.000912141	1914241	3	CREA	TANC2, AC037445.1	synonymous, variant, intron, non, coding, transcript
rs116020848	1	62958311	T	C	0.0088981	-7.90509e-05	0.00090361	437673	3	APOA	DOCK7	intron, variant, non, coding, transcript, exon
rs1047389	4	11401087	A	G	0.0088704	-8.51563e-05	0.000962543	822670	10	URT	HS3ST1	synonymous, variant, downstream, gene
rs41379748	2	191864302	A	G	0.00886982	-6.8931e-05	0.000806463	365795	2	GGT	STAT1	intron, variant, downstream, gene, NMD, transcript
rs12768105	10	115535465	T	C	0.00886249	-7.68247e-05	0.00088295	675755	2	DBP	PLEKHS1	intron, variant
rs72655652	15	92647684	A	C	0.00884902	8.12365e-05	0.000926428	1835344	3	SBP	SLCO3A1	missense, variant, non, coding, transcript, exon
rs2042791	2	214727221	A	C	0.00884581	7.59515e-05	0.00087489	3295855	2	URA	SPAG16	missense, variant, 3, prime, UTR, NMD, transcript
rs3923501	9	103065884	C	T	0.00884344	7.25391e-05	0.000841496	4403798	6	APOA	INVS, TEX10	downstream, gene, variant, intron, non, coding, transcript
rs12460533	19	49422437	A	T	0.00884327	9.59579e-05	0.00107138	4239969	6	CHO	NUCB1, AS1	splice, polypyrimidine, tract, variant, intron, upstream, gene, downstream, non, coding, transcript, exon
rs9973035	18	44526837	T	C	0.00883564	-7.56883e-05	0.000872667	633929	2	URA	KATNAL2	5, prime, UTR, variant, start, lost
rs6872783	5	34811080	G	A	0.00880149	-7.56589e-05	0.000874189	4685504	2	CREA	RAI14	intron, variant, downstream, gene, non, coding, transcript, NMD
rs142007559	3	33885757	A	G	0.00880148	7.746e-05	0.00089117	3204137	2	GGT	PDCD6IP	intron, variant, downstream, gene, non, coding, transcript
rs28549336	17	79783163	T	C	0.00878047	9.10942e-05	0.00102713	3558329	2	APOA	FAM195B, AC174470.1	intron, variant, 3, prime, UTR, upstream, gene, 5
rs61753747	8	120744293	C	T	0.00877792	-6.68824e-05	0.000789494	3313615	2	APOA	TAF2	synonymous, variant, downstream, gene
rs7217194	17	7852887	T	G	0.00877528	9.91092e-05	0.00111162	174647	15	SHBG	CNTROB	3, prime, UTR, variant, NMD, transcript, downstream, gene, non, coding, exon
rs35299693	12	48358203	A	G	0.00877369	8.69978e-05	0.000990352	200737	4	HBA1C	TMEM106C	missense, variant, 5, prime, UTR, upstream, gene, non, coding, transcript, exon, NMD, intron
rs7935468	11	117299617	T	C	0.00876343	-8.15646e-05	0.000934644	493288	6	TRIG	DSCAML1	intron, variant
rs8111157	19	11258638	G	A	0.00873942	9.27737e-05	0.00104644	9332	4	CHO	SPC24	intron, variant, NMD, transcript
rs10489469	1	112234084	G	T	0.00873715	-8.40704e-05	0.000958938	994909	3	CREA	RAP1A, FAM212B	intron, variant, non, coding, transcript
rs11653054	17	7004927	C	T	0.00871353	9.01985e-05	0.00102126	128544	4	ALP	ASGR2	synonymous, variant
rs78927351	4	101982305	C	G	0.0086707	7.11809e-05	0.000834275	1442656	3	HDL	PPP3CA	synonymous, variant
rs436556	6	5086558	A	C	0.00866056	7.71497e-05	0.000893225	2288238	3	URT	PPP1R3G	missense, variant
rs36024592	18	44236995	A	T	0.00865046	-7.27425e-05	0.000850218	344087	2	URA	LOXHD1	start, lost
rs2057727	6	30297529	T	C	0.00863891	8.4649e-05	0.000969251	3290981	6	PHOS	TRIM39, HCG18, HCG17, RPP21	synonymous, variant, upstream, gene, downstream
rs62620048	3	55504082	G	A	0.00863829	-7.49834e-05	0.000872598	2970520	4	AST	WNT5A	3, prime, UTR, variant, downstream, gene, non, coding, transcript, exon
rs140017560	3	136141711	A	G	0.00863087	-7.77918e-05	0.000906542	214998	3	SHBG	STAG1	splice, polypyrimidine, tract, variant, intron, NMD, transcript, downstream, gene
rs10283100	8	120596023	G	A	0.00861124	6.60498e-05	0.000786231	2643600	2	HBA1C	ENPP2	missense, variant, upstream, gene
rs117663474	20	29891242	A	T	0.00859617	6.57681e-05	0.000784405	4668288	4	ALP	DEFB116	missense, variant
rs17129563	1	67450431	A	G	0.00857025	7.42973e-05	0.000868303	4054447	3	APOA	MIER1	missense, variant, intron
rs139816507	1	109656931	G	A	0.00856537	-8.803e-05	0.001014	1483070	8	APOB	KIAA1324, C1orf194	synonymous, variant, upstream, gene, non, coding, transcript, exon, NMD
rs17750998	19	19388446	G	A	0.00855385	-8.7089e-05	0.00100008	84136	3	LDL	SUGP1, TM6SF2, AC138430.4	intron, variant, upstream, gene, NMD, transcript, non, coding
rs28491820	15	78327016	G	A	0.00854348	-7.78734e-05	0.000904865	2297347	2	URT	TBC1D2B, MIR1827	intron, variant, upstream, gene
rs75502158	5	41055830	A	G	0.00852741	-6.62321e-05	0.000790659	269161	2	IGF1	MROH2B	intron, variant, upstream, gene, non, coding, transcript
rs73223174	8	24366660	T	C	0.00852312	-8.0902e-05	0.00093552	4413461	3	HDL	ADAM7, RP11, 561E1.1, 624C23.1	3, prime, UTR, variant, downstream, gene, intron, non, coding, transcript
rs58515674	6	130415355	C	A	0.00852113	7.21296e-05	0.000848571	2912502	3	URA	L3MBTL3	intron, variant, downstream, gene
rs11465205	1	155160941	C	T	0.00851954	-8.24292e-05	0.000951515	287066	7	CRP	TRIM46, MUC1, THBS3, RP11, 201K10.3, MIR92B	downstream, gene, variant, intron, missense, non, coding, transcript, exon, upstream
rs2236083	23	107084075	A	C	0.00851893	5.85917e-05	0.00071726	1514737	2	TRIG	MID2	synonymous, variant
rs3739722	9	104335682	C	T	0.00851342	-7.32383e-05	0.000860011	344284	2	ALP	GRIN3A	missense, variant
rs1835346	6	161162290	A	G	0.0085126	-7.2805e-05	0.000857604	360870	6	LDL	PLG	intron, variant, non, coding, transcript
rs3212931	19	45927315	G	T	0.00851242	9.05184e-05	0.00103389	2498551	2	VITD	ERCC1	upstream, gene, variant, 5, prime, UTR, intron
rs41277313	22	24967832	G	C	0.00850477	-8.34119e-05	0.000961882	17604	14	GGT	SNRPD3	intron, variant, NMD, transcript
rs3169166	15	78563103	A	C	0.00850468	7.71001e-05	0.000898649	2533434	2	CREA	DNAJA4	intron, variant, NMD, transcript, non, coding, downstream, gene, upstream
rs1109342	16	75445675	A	G	0.00849101	-7.46182e-05	0.000874335	3650162	2	APOB	CFDP1, SNORA76, RP11, 77K12.1	intron, variant, upstream, gene, downstream, non, coding, transcript
rs61746311	5	72427404	C	G	0.00849063	-7.61544e-05	0.000889652	2946825	2	CHO	TMEM171, RP11, 232L2.2	missense, variant, downstream, gene
rs1883828	22	41739370	T	C	0.00848211	-8.12024e-05	0.000940732	1966037	2	CRP	ZC3H7B	intron, variant
rs61748836	8	17541943	T	G	0.00848112	8.14922e-05	0.000943281	2411256	4	TRIG	MTUS1, MIR548V	missense, variant, downstream, gene, non, coding, transcript, exon, 3, prime, UTR, NMD, upstream
rs61748577	6	24454313	T	C	0.00847674	-7.2136e-05	0.000852559	168806	8	ALP	GPLD1	missense, variant
rs4784708	16	56703914	G	C	0.00847653	-8.05524e-05	0.000934569	257995	3	LDL	MT1H, MT1G	intron, variant, upstream, gene
rs144672514	1	161514456	C	T	0.00847548	-8.82672e-05	0.00101864	140940	8	TPROT	FCGR3A, RP11, 25K21.6	intron, variant, downstream, gene, non, coding, transcript
rs34963341	1	22313197	A	C	0.00845937	-8.57445e-05	0.000989397	302501	8	PHOS	CELA3B, RNU6, 1022P, RN7SL386P	intron, variant, upstream, gene, downstream, non, coding, transcript
rs2302289	17	67075294	T	C	0.00842835	-7.72339e-05	0.000902857	3256072	4	IGF1	ABCA6	intron, variant, non, coding, transcript
rs198550	17	48652875	G	A	0.00842297	-7.69735e-05	0.000900434	1326655	5	SHBG	CACNA1G	intron, variant, NMD, transcript, downstream, gene
rs143387234	2	215818724	G	A	0.00842257	7.23722e-05	0.000854345	4387358	3	CREA	ABCA12, AC072062.1	synonymous, variant, intron, non, coding, transcript
rs12449311	17	21147520	C	T	0.0084087	6.92402e-05	0.000823718	3002127	2	CREA	C17orf103	missense, variant, synonymous
rs11125855	2	61021349	A	G	0.00840722	-6.49165e-05	0.000781552	66208	2	CAL	PAPOLG	intron, variant, NMD, transcript, downstream, gene, non, coding, exon
rs12304889	12	117907449	T	C	0.00840665	7.96041e-05	0.000927327	3497073	4	GGT	KSR2	downstream, gene, variant, intron
rs17033	4	100228945	T	C	0.0084065	-6.8964e-05	0.000826418	345660	2	IGF1	ADH1B	3, prime, UTR, variant, NMD, transcript, non, coding, exon
rs3825807	15	79089111	A	G	0.00839646	-7.65854e-05	0.000899548	3059442	2	CREA	ADAMTS7	missense, variant, non, coding, transcript, exon
rs2253519	2	38809162	C	T	0.00839598	7.33759e-05	0.000865382	4877942	3	DBP	HNRNPLL	intron, variant, NMD, transcript, downstream, gene, non, coding, exon
rs77661689	17	6331593	T	C	0.00838499	-8.63138e-05	0.000996924	801878	4	ALP	AIPL1	intron, variant, NMD, transcript
rs3814995	19	36342212	C	T	0.00837277	8.15949e-05	0.000949393	597667	4	ALB	NPHS1, KIRREL2	missense, variant, upstream, gene, downstream
rs148296632	3	142185078	T	C	0.00836756	7.01349e-05	0.000834317	281081	3	URT	ATR, RP11, 383G6.3	intron, variant, non, coding, transcript
rs1203651	1	14109114	A	G	0.00836621	-8.20213e-05	0.000954028	2314718	2	ALT	PRDM2	synonymous, variant, intron, downstream, gene, NMD, transcript
rs2275309	1	48937691	A	T	0.00835872	-7.42929e-05	0.000876087	2262213	2	CAL	SPATA6	upstream, gene, variant, 5, prime, UTR, non, coding, transcript, exon, NMD
rs9646651	19	15565046	G	A	0.00835546	8.72296e-05	0.00100774	4042804	2	SBP	WIZ, RASAL3, MIR1470	upstream, gene, variant, synonymous, downstream, non, coding, transcript, exon
rs77009095	5	77412068	C	T	0.00835342	7.47164e-05	0.000880397	2037839	2	CHO	AP3B1	splice, polypyrimidine, tract, variant, intron, upstream, gene
rs61741720	6	109274276	C	T	0.00833498	-6.86028e-05	0.000819802	321934	2	IGF1	ARMC2	missense, variant
rs7131178	11	93462607	T	A	0.00832654	6.86496e-05	0.000822014	947823	3	ALT	TAF1D, KIAA1731, SNORD6, SNORA32, SNORA1, SNORA25, SNORA18, SNORA8, MIR1304, SNORD5	downstream, gene, variant, missense
rs149538577	10	75889070	C	T	0.00831148	-7.84263e-05	0.000919142	4057736	10	HBA1C	AP3M1	intron, variant, non, coding, transcript
rs62122585	19	14517415	T	C	0.00831113	8.85821e-05	0.00102334	3249445	5	APOB	DDX39A, CD97, CTC, 548K16.5	downstream, gene, variant, intron, non, coding, transcript
rs13037900	20	43379268	C	A	0.00830735	-7.56577e-05	0.000891711	444674	2	SHBG	RIMS4, KCNK15, RP11, 445H22.4	downstream, gene, variant, missense, upstream
rs13293508	9	111979191	C	A	0.00830298	-6.72299e-05	0.000806825	4509509	6	APOA	EPB41L4B	intron, variant
rs740776	12	3310439	T	C	0.00829885	7.25333e-05	0.000860446	265786	3	ALP	TSPAN9	intron, variant, NMD, transcript
rs6829844	4	6330938	C	G	0.00828095	-7.49701e-05	0.000885755	358089	2	ALB	PPP2R2C	intron, variant, downstream, gene
rs2073927	9	136031346	A	G	0.0082805	8.85906e-05	0.0010264	120366	7	ALP	GBGT1, RALGDS	downstream, gene, variant, intron, non, coding, transcript, exon
rs643423	11	119043656	T	C	0.00827698	-7.51013e-05	0.000887279	2481092	2	CHO	NLRX1	missense, variant, non, coding, transcript, exon, upstream, gene
rs62118276	19	9027313	A	G	0.00827306	-8.75972e-05	0.00101544	1371334	4	IGF1	MUC16	intron, variant
rs112767688	2	25360186	C	T	0.00826542	7.50691e-05	0.00088748	946392	3	HBA1C	EFR3B	intron, variant
rs117962928	17	62265507	C	T	0.00826248	-7.23812e-05	0.000860231	3075205	3	CREA	TEX2	intron, variant, non, coding, transcript
rs187821048	17	67109739	C	G	0.00825724	-7.33034e-05	0.000869776	3290517	2	APOB	ABCA6	intron, variant, non, coding, transcript, exon, downstream, gene
rs75802666	9	135776925	T	C	0.00824677	-8.60558e-05	0.00100086	467953	7	ALP	TSC1	intron, variant
rs17540915	14	102461691	G	A	0.00823932	-7.11296e-05	0.00084848	558419	3	HDL	DYNC1H1	intron, variant
rs72793935	2	24411579	A	G	0.00823832	6.76311e-05	0.000813407	2942112	2	TRIG	FAM228A, RP11, 507M3.1	intron, variant, NMD, transcript
rs34631405	19	45888808	C	T	0.00823412	-8.56394e-05	0.00099793	4524021	5	ALP	PPP1R13L	intron, variant, non, coding, transcript, upstream, gene
rs34627348	12	115117337	G	A	0.00822386	-7.24076e-05	0.000861955	3312614	3	CHO	TBX3	synonymous, variant, non, coding, transcript, exon, downstream, gene
rs116647099	2	166894209	T	C	0.00822341	7.27129e-05	0.000865312	1348243	3	SHBG	SCN1A, AC010127.3	intron, variant, non, coding, transcript, downstream, gene
rs1275391	20	35090820	G	C	0.00820767	7.44772e-05	0.000883611	4817700	3	CHO	DLGAP4	intron, variant, 5, prime, UTR, non, coding, transcript
rs12056632	8	82752291	A	G	0.00820562	-5.78093e-05	0.000717477	1327065	2	SHBG	SNX16	5, prime, UTR, variant
rs74687990	10	60380553	C	T	0.00820189	-6.95403e-05	0.000835139	27195	4	URT	BICC1	intron, variant, upstream, gene
rs2653349	6	55142337	G	A	0.00820094	-7.20969e-05	0.000859921	4332405	3	BMI	HCRTR2	missense, variant
rs41310388	1	22214040	G	A	0.00818964	-8.01493e-05	0.000942039	583775	11	ALP	HSPG2	synonymous, variant, missense, downstream, gene
rs3806995	6	46135984	T	G	0.00818163	-7.33737e-05	0.000873346	4673948	3	BMI	ENPP5	missense, variant, upstream, gene
rs77094397	11	6256668	A	G	0.00817877	-8.52214e-05	0.000995458	564959	3	ALP	FAM160A2, CNGA4	upstream, gene, variant, intron
rs188186641	14	103352679	T	C	0.00817304	7.15315e-05	0.00085494	332569	3	APOA	TRAF3	intron, variant, NMD, transcript
rs117754316	11	65714281	C	A	0.00816956	-7.76977e-05	0.00091814	4079826	2	TPROT	TSGA10IP	intron, variant, non, coding, transcript
rs13176855	5	43245922	C	T	0.00814952	-6.29026e-05	0.000769889	1920931	2	IGF1	NIM1K	synonymous, variant, downstream, gene
rs117810557	15	58004423	G	A	0.00814929	7.09011e-05	0.000849499	4068762	2	CREA	POLR2M, GCOM1	intron, variant, NMD, transcript, downstream, gene, non, coding
rs470871	18	74725348	C	T	0.00814269	-6.33597e-05	0.000773706	305874	2	URA	MBP	intron, variant, 3, prime, UTR, non, coding, transcript, upstream, gene, NMD, downstream
rs41285435	1	26670401	G	A	0.00814208	-8.02159e-05	0.000945247	2967375	3	GGT	AIM1L, RN7SL490P	5, prime, UTR, variant, synonymous, NMD, transcript, upstream, gene, downstream
rs61748244	2	165358792	G	A	0.00814174	7.39396e-05	0.00088066	4730248	4	ALP	GRB14	synonymous, variant, non, coding, transcript, exon
rs7688262	4	70080139	C	T	0.00813072	6.84476e-05	0.000827187	264415	3	GGT	UGT2B11, RP11, 704M14.1, 704M14.2	missense, variant, intron, non, coding, transcript, downstream, gene
rs142891193	3	45677572	A	G	0.00812433	6.99878e-05	0.000841215	4071277	3	HBA1C	LIMD1	intron, variant, non, coding, transcript
rs117104282	17	54939080	A	G	0.00812333	-7.10744e-05	0.000852117	4251222	2	PHOS	DGKE	intron, variant, upstream, gene
rs113838718	6	53883980	G	A	0.00812226	7.28107e-05	0.000869994	3074048	3	BMI	MLIP, ERHP2	intron, variant, upstream, gene
rs17378620	1	176832806	C	T	0.00812001	-7.57951e-05	0.000915711	178281	4	IGF1	ASTN1	3, prime, UTR, variant, intron
rs2245502	6	52130963	T	C	0.00810674	-7.28213e-05	0.000871044	1321031	3	BMI	MCM3	intron, variant
rs78152888	12	117013676	C	T	0.0081064	7.62525e-05	0.00090581	4267040	3	ALP	MAP1LC3B2	5, prime, UTR, variant
rs1563388	8	121293331	A	G	0.00809564	6.47921e-05	0.00078967	584508	3	ALP	COL14A1	intron, variant, downstream, gene
rs999384314	7	74457036	C	T	0.00809321	6.24639e-05	0.000767347	3987333	3	CREA	WBSCR16	3, prime, UTR, variant, downstream, gene, intron
rs16907355	11	10019879	G	A	0.00808806	-8.07949e-05	0.00095445	291276	2	DBP	SBF2	synonymous, variant, intron, non, coding, transcript, exon
rs77854863	1	110302505	G	A	0.00808188	7.29504e-05	0.00087323	837496	4	CHO	EPS8L3, GSTM5, RP4, 735C1.4	intron, variant, non, coding, transcript, exon, downstream, gene, upstream
rs1259	6	123539685	T	C	0.00807489	6.76574e-05	0.000819159	3963168	3	URA	TRDN	3, prime, UTR, variant
rs10932150	2	207169731	G	A	0.00807121	-6.81532e-05	0.000824375	4261635	2	URA	ZDBF2	missense, variant
rs2301683	17	41860755	G	A	0.00806747	-7.53776e-05	0.000898625	318212	3	APOA	DUSP3, C17orf105, RP5, 905N1.2	upstream, gene, variant, intron, NMD, transcript, non, coding
rs16985306	2	18768850	A	G	0.00806702	-6.77922e-05	0.000820568	2700617	4	LDL	NT5C1B, RNU6, 1215P, RDH14	synonymous, variant, upstream, gene, NMD, transcript, non, coding, exon
rs11630752	15	91449810	G	A	0.00806027	7.30652e-05	0.000875295	637470	3	SBP	MAN2A2	intron, variant, upstream, gene, NMD, transcript, downstream, non, coding
rs17332342	23	105132225	T	C	0.00805977	-5.46901e-05	0.000690379	3466587	2	APOB	NRK	intron, variant
rs180925984	22	39239687	C	G	0.00805613	7.71326e-05	0.000918058	533646	2	GGT	NPTXR	synonymous, variant
rs1239333	5	38904328	A	G	0.0080554	-6.16971e-05	0.000759735	2420663	2	IGF1	OSMR	intron, variant, upstream, gene
rs7085920	10	60408485	A	G	0.00804921	-6.48597e-05	0.000791338	4552047	2	SHBG	BICC1	intron, variant, non, coding, transcript
rs17875371	6	30460232	C	T	0.00804395	6.64795e-05	0.000808251	4593263	4	URT	HLA, E	intron, variant, downstream, gene
rs2304899	15	75336729	G	A	0.00804211	-7.35962e-05	0.000881269	692940	2	URT	PPCDC	missense, variant, splice, region, downstream, gene, 5, prime, UTR, intron, non, coding, transcript, exon
rs112517643	3	42253090	G	A	0.00803969	-7.03785e-05	0.000848188	3683515	2	AST	TRAK1	intron, variant, 3, prime, UTR, non, coding, transcript
rs11070154	13	96506664	A	G	0.00803088	-6.4965e-05	0.000793385	351591	2	ALP	UGGT2	synonymous, variant, downstream, gene
rs2229611	17	41063466	C	T	0.00802721	7.50043e-05	0.000896534	1115501	3	APOA	G6PC	3, prime, UTR, variant, downstream, gene
rs117692929	12	120884253	G	C	0.00802243	7.31299e-05	0.000877127	4472922	5	APOA	GATC, TRIAP1, RPL31P52, AL021546.6	upstream, gene, variant, downstream, 5, prime, UTR, NMD, transcript, intron
rs4358188	20	36946848	G	A	0.00801975	7.50239e-05	0.000896785	2961672	3	APOB	BPI, CTD, 2308N23.2	missense, variant, intron, non, coding, transcript, upstream, gene, exon
rs6057703	20	31608250	C	A	0.00801683	-7.05976e-05	0.000851306	2139158	2	CREA	BPIFB2	intron, variant
rs2234412	11	57320044	C	T	0.0079977	-9.07414e-05	0.00107968	4893366	4	GGT	UBE2L6, SMTNL1	intron, variant, downstream, gene, non, coding, transcript
rs3742026	12	109670657	G	C	0.00797284	6.96517e-05	0.000843711	2134066	2	DBP	ACACB	intron, variant, NMD, transcript, upstream, gene
rs144409458	17	61877035	A	G	0.00796991	-6.95004e-05	0.000841715	2686733	2	PHOS	DDX42	intron, variant, NMD, transcript, upstream, gene, downstream
rs117706029	11	115045674	G	A	0.00796845	-7.33515e-05	0.00088147	1516890	3	APOB	CADM1	downstream, gene, variant, 3, prime, UTR, intron, non, coding, transcript
rs17314548	2	17696756	C	T	0.00796265	6.68555e-05	0.000814458	3772711	5	APOB	RAD51AP2	missense, variant
rs6564033	16	84432023	C	A	0.00795466	7.48992e-05	0.000898134	2613407	4	HBA1C	ATP2C2	intron, variant
rs60849332	19	36351768	G	A	0.00795002	-7.56227e-05	0.000905986	607223	4	ALB	KIRREL2, NPHS1	intron, variant, downstream, gene, non, coding, transcript
rs76121095	17	61151390	G	A	0.00794236	7.08612e-05	0.000856821	881182	3	IGF1	TANC2	intron, variant
rs79723049	8	80678062	T	A	0.00793211	-5.45956e-05	0.00069254	747164	2	SHBG	HEY1, RP11, 26J3.1, 27N21.3	intron, variant, non, coding, transcript, downstream, gene, upstream
rs111536196	1	160518115	T	C	0.00793108	7.76913e-05	0.000928197	855401	8	TPROT	CD84, RP11, 528G1.2, AL138930.2	splice, region, variant, polypyrimidine, tract, intron, downstream, gene, non, coding, transcript, upstream
rs116816976	1	55224773	A	C	0.00792444	6.97197e-05	0.000845686	4024869	2	CAL	PARS2	missense, variant
rs118054030	19	45649371	C	A	0.00791315	8.3837e-05	0.000994069	325911	7	CRP	PPP1R37, NKPD1, MARK4, AC005757.7	intron, variant, downstream, gene, non, coding, transcript, exon
rs541961931	1	9353157	C	A	0.00789202	-7.64227e-05	0.000916737	2509962	2	SBP	SPSB1	intron, variant, upstream, gene
rs112050992	3	123039584	C	T	0.00789114	-7.40917e-05	0.000892413	269382	5	CAL	ADCY5	intron, variant, upstream, gene
rs870187	17	79166103	T	C	0.00788744	-7.6689e-05	0.000919453	598388	6	HBA1C	AZI1	intron, variant
rs34506896	5	179666827	C	T	0.007884	7.24325e-05	0.000875407	3282944	2	PHOS	MAPK9	intron, variant, downstream, gene, non, coding, transcript
rs112985580	19	46341693	G	A	0.00787518	-8.1688e-05	0.000972993	947021	3	ALT	SYMPK	intron, variant, non, coding, transcript, downstream, gene, NMD
rs34461862	18	43204739	C	T	0.00786506	6.51054e-05	0.00080077	688169	2	URA	SLC14A2	missense, variant, NMD, transcript
rs62621450	4	106197000	A	G	0.00786056	-6.28134e-05	0.000777069	2772039	2	APOA	TET2	3, prime, UTR, variant, NMD, transcript, missense
rs79863383	18	56246818	G	A	0.00784686	-6.49783e-05	0.000799952	167390	2	GGT	ALPK2	missense, variant, upstream, gene, downstream, non, coding, transcript, exon
rs149001465	14	23947234	G	A	0.00784643	-7.56708e-05	0.000911084	762337	3	ALP	NGDN	3, prime, UTR, variant, stop, retained, downstream, gene, non, coding, transcript, exon, intron
rs114244819	5	54929780	C	T	0.00783622	5.80491e-05	0.000729472	1693205	2	GGT	SLC38A9	intron, variant, NMD, transcript, non, coding, exon, 3, prime, UTR
rs187814937	3	124141634	A	T	0.0078322	7.33671e-05	0.000887135	1371432	5	CAL	KALRN	intron, variant, non, coding, transcript
rs114348372	3	62636777	A	G	0.00781231	-6.65803e-05	0.000817338	4162175	4	AST	CADPS	intron, variant
rs16849331	4	74277908	G	T	0.00780851	6.73184e-05	0.000825258	32647	2	ALB	ALB	intron, variant, downstream, gene, NMD, transcript, upstream, non, coding, exon
rs146128830	16	1652418	C	T	0.00779973	7.6925e-05	0.000926417	1946829	5	IGF1	IFT140, LA16c, 395F10.2	missense, variant, NMD, transcript, non, coding, exon, intron
rs2275580	10	99125949	T	C	0.00779935	7.11784e-05	0.000865666	2812966	3	ALT	RRP12	missense, variant, upstream, gene, non, coding, transcript, exon
rs1140809	6	30611676	A	C	0.00779707	-6.5937e-05	0.000813947	4744707	4	URT	C6orf136, ATAT1, AL662800.2	upstream, gene, variant, 3, prime, UTR, intron, non, coding, transcript, downstream
rs145252437	1	157771966	T	C	0.00778467	7.64811e-05	0.00092138	1906075	5	CRP	FCRL1	missense, variant, splice, polypyrimidine, tract, intron, non, coding, transcript, upstream, gene, downstream, exon
rs6914831	6	135639644	T	C	0.00778306	-6.8488e-05	0.000838293	3332609	3	PHOS	AHI1	intron, variant, NMD, transcript, 3, prime, UTR, non, coding
rs2104772	9	117808785	T	A	0.00778233	7.15672e-05	0.00087058	699932	2	AST	TNC	missense, variant, intron, non, coding, transcript, exon, downstream, gene
rs1063499	5	40955561	C	G	0.0077792	-6.26959e-05	0.000778776	644598	2	URA	C7	missense, variant
rs17438178	12	102494849	T	C	0.00777818	6.76484e-05	0.000829713	4901498	4	PHOS	NUP37	synonymous, variant, non, coding, transcript, exon
rs369505817	2	18741527	G	A	0.0077774	-6.49797e-05	0.000802104	2727940	5	APOA	NT5C1B, RDH14	downstream, gene, variant, synonymous, intron, non, coding, transcript
rs117454909	14	36240219	T	G	0.00777724	-5.54244e-05	0.000704698	2459928	2	VITD	RALGAPA1, QRSL1P3	splice, polypyrimidine, tract, variant, intron, downstream, gene
rs138032564	1	53738400	T	C	0.00777038	6.82833e-05	0.000836932	2538496	2	CAL	LRP8, RP4, 784A16.1	intron, variant, downstream, gene, upstream, NMD, transcript
rs11652480	17	64873552	G	A	0.00776565	-6.9005e-05	0.000844346	2840980	3	IGF1	CACNG5	synonymous, variant
rs2067061	20	42196550	T	G	0.0077513	-6.97652e-05	0.000852888	1627392	2	CRP	SGK2	splice, region, variant, polypyrimidine, tract, intron, upstream, gene, NMD, transcript
rs56304903	17	38346802	C	G	0.00774409	8.11535e-05	0.000984185	3832165	4	HDL	RAPGEFL1	intron, variant, non, coding, transcript, upstream, gene, downstream
rs111237991	19	15466240	T	C	0.00773901	7.55878e-05	0.000914701	3906536	3	CHO	AKAP8	intron, variant, NMD, transcript
rs113669303	18	60190826	C	T	0.00773023	-6.37156e-05	0.000790678	3776618	2	GGT	ZCCHC2	missense, variant, upstream, gene
rs2074189	17	45887951	T	G	0.00771436	7.32884e-05	0.000891832	3708984	3	TRIG	OSBPL7	intron, variant, upstream, gene, NMD, transcript, downstream, non, coding
rs185322740	19	9057177	G	T	0.00771251	7.95253e-05	0.000957843	2465065	2	DBP	MUC16	missense, variant
rs1256843	15	90446653	C	T	0.00769909	6.91199e-05	0.000848253	365687	3	SBP	C15orf38, AP3S2	intron, variant, upstream, gene
rs8135738	22	39777680	C	T	0.00769274	7.25584e-05	0.000884663	4347	2	CRP	SYNGR1	downstream, gene, variant, intron
rs10998973	10	71562437	A	G	0.00769127	7.14845e-05	0.00087307	222370	10	HBA1C	COL13A1	synonymous, variant, NMD, transcript
rs3729604	5	159344461	G	A	0.00768281	-5.99136e-05	0.000753058	2797215	3	CHO	ADRA1B	synonymous, variant
rs9923128	16	58703966	G	A	0.00767705	-7.23657e-05	0.000887426	819611	3	AST	SLC38A7	intron, variant, downstream, gene, NMD, transcript, non, coding
rs28360458	12	121622024	G	A	0.00767531	7.07716e-05	0.000867161	3735151	6	HDL	P2RX7, RP11, 340F14.5	intron, variant, NMD, transcript, non, coding, upstream, gene
rs146343030	19	9071596	G	T	0.00767269	-8.05038e-05	0.000970261	1327051	4	IGF1	MUC16	missense, variant
rs72638959	8	41519303	G	A	0.0076724	6.18207e-05	0.000773158	1163085	3	HBA1C	ANK1, MIR486, RP11, 930P14.1	intron, variant, downstream, gene, non, coding, transcript, exon
rs145689643	5	180275315	C	A	0.00766979	-7.0152e-05	0.000860214	3891432	2	PHOS	ZFP62	3, prime, UTR, variant, downstream, gene, intron, non, coding, transcript
rs77842623	15	93616785	A	C	0.00766924	-6.95265e-05	0.000853672	2804445	3	SBP	RGMA	intron, variant, splice, region, upstream, gene, NMD, transcript
rs2875382	6	84799185	C	T	0.00766795	5.62517e-05	0.0007161	2366794	2	IGF1	MRAP2	synonymous, variant
rs2230674	12	51208122	C	G	0.00766468	7.26547e-05	0.000886887	2649182	4	HBA1C	ATF1	missense, variant, downstream, gene, 3, prime, UTR, NMD, transcript
rs1702003	1	55060362	G	A	0.00766368	-6.70298e-05	0.000827595	3860458	2	CAL	ACOT11	missense, variant, splice, region, upstream, gene, non, coding, transcript, exon
rs77165791	12	122667631	T	G	0.00766057	-7.02956e-05	0.000863616	2689544	6	HDL	LRRC43	upstream, gene, variant, intron, non, coding, transcript
rs7420715	2	189899572	C	T	0.0076605	5.7552e-05	0.000729576	2330525	2	GGT	COL5A2	intron, variant
rs2455069	19	51728641	A	G	0.00765333	-8.15033e-05	0.00098199	2638578	2	ALP	CD33	missense, variant, intron, upstream, gene, non, coding, transcript, exon
rs2723222	2	210846867	A	G	0.00764643	6.39976e-05	0.000796914	584499	2	URT	UNC80	intron, variant, non, coding, transcript
rs16995595	22	47097505	C	T	0.00764449	-7.34603e-05	0.000896299	2833011	5	AST	CERK	intron, variant, NMD, transcript
rs17292725	18	51880889	G	A	0.00764194	6.41944e-05	0.000798723	4715792	2	CHO	C18orf54, STARD6	upstream, gene, variant, stop, gained
rs117029634	17	47303125	C	T	0.00763413	7.04848e-05	0.000867423	182995	4	SHBG	ABI3, PHOSPHO1	downstream, gene, variant, intron, synonymous
rs10407707	19	52376040	G	A	0.00763356	-8.01015e-05	0.00096791	3950174	2	VITD	ZNF577	synonymous, variant, intron, non, coding, transcript, upstream, gene
rs2291277	15	72195229	T	C	0.0076239	6.8894e-05	0.000851026	1765322	3	GGT	MYO9A	intron, variant, upstream, gene, non, coding, transcript, downstream
rs41266013	1	22215242	C	T	0.0076214	-7.61447e-05	0.00092964	149208	11	ALP	HSPG2	upstream, gene, variant, intron, downstream
rs199618189	2	96546307	G	T	0.0076201	-5.96435e-05	0.000752851	2468041	2	CAL	ANKRD36C	intron, variant, non, coding, transcript, NMD
rs7608	19	55913038	T	C	0.00761828	8.09669e-05	0.000978031	1474984	2	AST	UBE2S, RPL28, CTD, 2105E13.13	synonymous, variant, intron, upstream, gene, downstream
rs77559005	12	2077098	C	A	0.00760656	6.54554e-05	0.000813225	967555	3	ALP	DCP1B, CACNA1C	intron, variant, upstream, gene, non, coding, transcript, NMD
rs117934605	19	45655647	G	T	0.0075992	-8.0319e-05	0.000975455	4290860	5	ALP	NKPD1, PPP1R37, MARK4, AC005757.7	missense, variant, downstream, gene, intron, upstream
rs12008095	23	108708552	A	G	0.00759158	-5.06848e-05	0.000662254	109740	2	APOB	GUCY2F	missense, variant
rs34215645	12	4724995	C	T	0.00758418	-6.84107e-05	0.000846439	2283440	3	PHOS	DYRK4, AKAP3, RP11, 500M8.7	downstream, gene, variant, synonymous, intron, NMD, transcript
rs1562364	10	103588734	G	A	0.00757514	7.09496e-05	0.000872578	1649819	3	AST	KCNIP2, AS1	intron, variant, non, coding, transcript, downstream, gene, upstream
rs11714060	3	143567207	G	A	0.00756407	6.14029e-05	0.000772328	1663210	2	CREA	SLC9A9	5, prime, UTR, variant, NMD, transcript, non, coding, exon
rs116383392	4	77300408	G	A	0.0075625	6.40235e-05	0.000802102	84068	2	CREA	CCDC158	intron, variant
rs2297603	9	101778265	G	T	0.00755964	-6.35253e-05	0.000794706	2213133	2	ALP	COL15A1	missense, variant
rs999716	17	42339424	T	C	0.00755666	7.27024e-05	0.000894546	160457	3	TRIG	SLC4A1, AC003043.1	intron, variant, non, coding, transcript, exon
rs78728989	14	100358434	A	G	0.00754747	6.65796e-05	0.000826984	2094426	4	GGT	EML1	intron, variant, upstream, gene
rs61936939	12	116406910	G	A	0.00754679	-6.54452e-05	0.000815384	4602187	3	CHO	MED13L	splice, region, variant, polypyrimidine, tract, intron, downstream, gene
rs41278377	9	111947761	G	T	0.00753938	-6.00758e-05	0.000759037	4539353	6	HDL	EPB41L4B	splice, region, variant, intron
rs3734586	6	7601720	C	T	0.0075233	-6.55894e-05	0.000818247	226924	3	URT	SNRNP48	synonymous, variant, non, coding, transcript, exon
rs1574534	11	126316610	T	C	0.00748877	-6.76375e-05	0.000841735	267224	4	ALP	KIRREL3	intron, variant
rs2965169	19	45251156	A	C	0.0074868	-8.21679e-05	0.00100448	3886369	5	ALP	BCL3	upstream, gene, variant, non, coding, transcript, exon
rs12442879	15	57524982	G	A	0.0074855	-6.60725e-05	0.000824376	3381606	2	GGT	TCF12	missense, variant, intron, non, coding, transcript, exon, downstream, gene
rs562202016	1	23280205	G	C	0.00748398	6.82635e-05	0.000848533	4006084	2	SHBG	LACTBL1	missense, variant
rs61748637	1	28793149	C	G	0.00748059	-6.98779e-05	0.000865676	1506860	3	IGF1	PHACTR4	synonymous, variant, non, coding, transcript, exon
rs6032259	20	44141331	G	A	0.00747792	-6.9268e-05	0.000858913	4232811	3	APOB	SPINT3	missense, variant
rs8192563	20	21493018	C	G	0.00747053	-5.51219e-05	0.000710039	3729936	4	ALP	NKX2, 2, AS1	missense, variant, downstream, gene
rs1437067	18	54677435	A	C	0.00746789	6.11051e-05	0.000772537	1736773	2	ALT	WDR7	intron, variant, 3, prime, UTR, NMD, transcript
rs56229013	4	76521525	C	T	0.0074581	-6.31701e-05	0.000794997	694815	2	CREA	CDKL2	splice, acceptor, variant, downstream, gene, non, coding, transcript
rs2305821	11	117153420	T	C	0.00744413	-7.19158e-05	0.000896356	347091	8	APOA	RNF214, BACE1	intron, variant, downstream, gene, non, coding, transcript
rs4665830	2	26399214	A	G	0.00743443	6.56466e-05	0.000822533	1985420	3	HBA1C	GAREML	splice, region, variant, synonymous, upstream, gene
rs113759560	18	77710715	C	T	0.00742985	5.66894e-05	0.000727512	2679493	2	CREA	PQLC1	intron, variant, NMD, transcript
rs73611286	20	40122088	C	G	0.00742663	-6.81312e-05	0.000848644	3701854	5	HDL	CHD6	intron, variant, downstream, gene
rs7592352	2	191235610	A	G	0.00741787	-5.52824e-05	0.00071332	994487	2	GGT	INPP1	missense, variant, downstream, gene, non, coding, transcript, exon
rs36032236	1	109482304	G	A	0.00741607	-6.62988e-05	0.000829912	1657697	5	LDL	CLCC1, AKNAD1	missense, variant, intron, non, coding, transcript, exon
rs149836448	16	28332182	C	T	0.00741475	6.09835e-05	0.000773138	200993	3	IGF1	SBK1	synonymous, variant
rs78798490	1	24417266	G	A	0.00740827	-7.14089e-05	0.000883865	2406570	11	ALP	MYOM3, RP11, 293P20.2	intron, variant, downstream, gene, non, coding, transcript
rs5333	4	148461037	T	C	0.00740037	-5.84423e-05	0.00074678	3809793	2	HBA1C	EDNRA	synonymous, variant, 3, prime, UTR, non, coding, transcript, exon, NMD
rs78079991	11	62557581	C	G	0.00739788	-6.93364e-05	0.000862874	923126	2	ALP	TAF6L, NXF1, TMEM223, TMEM179B, RP11, 727F15.12	downstream, gene, variant, 3, prime, UTR, intron, non, coding, transcript, exon, upstream
rs191333338	16	88808901	G	A	0.00739365	6.90948e-05	0.000861046	1763471	4	HBA1C	PIEZO1, RP5, 1142A6.8, 1142A6.2, 1142A6.7	intron, variant, upstream, gene, downstream
rs2298135	1	156627996	T	C	0.00739301	-6.95558e-05	0.00086551	1688037	3	ALP	BCAN, RP11, 284F21.7	synonymous, variant, downstream, gene, intron, non, coding, transcript, exon
rs11042500	11	9830595	A	G	0.00739061	7.53755e-05	0.000928772	4138886	3	ALP	SBF2, AS1	intron, variant, non, coding, transcript, exon, downstream, gene
rs62641683	10	13378273	G	C	0.00738972	-6.6189e-05	0.000829113	4884985	7	AST	SEPHS1	synonymous, variant, downstream, gene
rs1802241	20	33872215	C	A	0.00738955	-6.53307e-05	0.000820868	124807	2	CREA	FAM83C, EIF6, AS1, RP4, 614O4.11	downstream, gene, variant, missense, NMD, transcript, upstream, non, coding, exon
rs2302313	17	56283026	G	A	0.00737871	-6.3925e-05	0.000805709	1673488	2	TPROT	EPX, MKS1	downstream, gene, variant, 3, prime, UTR, synonymous
rs396118	19	41096189	A	G	0.00737645	7.73101e-05	0.000949184	4510119	6	CHO	LTBP4, SHKBP1	upstream, gene, variant, synonymous, intron, non, coding, transcript, exon, NMD, downstream
rs117447942	11	63064887	G	T	0.00736345	6.89131e-05	0.000859848	1430432	2	TPROT	SLC22A10	missense, variant, non, coding, transcript, exon, intron, NMD, 5, prime, UTR
[truncated: 20,136 more rows]

## Sheet: Table S2
rsID	Chromosome	Position (hg19)	Alt	Ref	PIP	Estimate (mean)	SD	Distance from center	Credible set	Measurement	Genes	Feature type (VEP)2
rs10007119	4	3473066	A	G	1	-0.0254788	0.00366901	2498717	1	ALB	DOK7	intron, variant, non, coding, transcript
rs1004446	11	2170143	G	A	1	-0.0467933	0.00377847	2497752	1	IGF1	IGF2, INS, AS	intron, variant, NMD, transcript, downstream, gene, non, coding
rs10066749	5	31055026	T	G	1	0.0304538	0.00367145	14452	1	GGT	RPL19P11	downstream, gene, variant
rs10203853	2	234687418	A	T	1	0.0870602	0.00423728	716333	6	TBIL	MROH2A	intron, variant, upstream, gene
rs10412048	19	11193949	A	G	1	0.0930862	0.00370071	453959	1	LDL	.	intergenic, variant
rs10422256	19	11216617	A	G	1	0.0336997	0.00388311	476627	3	LDL	LDLR	intron, variant, downstream, gene, upstream
rs10521222	16	51158710	C	T	1	0.0301152	0.00370133	204976	2	CRP	.	intergenic, variant
rs1056283	6	24420376	T	C	1	0.0328505	0.00449279	682716	4	ALP	MRS2, GPLD1	intron, variant, downstream, gene
rs10767873	11	30768678	C	T	1	0.0303762	0.003755	8811	2	CREA	.	intergenic, variant
rs10795701	10	9314364	C	G	1	-0.0296204	0.0041208	1045	1	CAL	LINC00709	upstream, gene, variant
rs10798489	1	176935711	T	C	1	-0.0278778	0.00393238	144659	1	IGF1	ASTN1	intron, variant, non, coding, transcript
rs10805346	4	9920347	T	C	1	0.154887	0.00691866	520739	1	URT	SLC2A9, RP13, 560N11.1	intron, variant, upstream, gene, non, coding, transcript
rs10849081	12	4597481	A	C	1	-0.0356658	0.00376807	2492982	1	PHOS	C12orf4	3, prime, UTR, variant, downstream, gene
rs10917025	1	21952590	G	A	1	0.0446596	0.00435777	606703	4	ALP	RAP1GAP	intron, variant, non, coding, transcript, upstream, gene, NMD
rs11045532	12	20981734	T	C	1	-0.0366261	0.00432358	98133	3	TBIL	SLCO1B3, LST3, SLCO1B7	intron, variant
rs11075987	16	53815161	T	G	1	-0.0426256	0.00378599	982	1	BMI	FTO	intron, variant, NMD, transcript, non, coding
rs11078698	17	7479892	C	T	1	0.027613	0.00378221	390404	7	SHBG	CD68, EIF4A1, SENP3, SNORA67, SNORA48, SNORD10	upstream, gene, variant, synonymous, downstream, intron, non, coding, transcript, exon, 3, prime, UTR, NMD, missense
rs111677829	12	21236976	G	T	1	0.0316002	0.00642031	353375	5	TBIL	LST3, SLCO1B7, RP11, 125O5.2, SLCO1B3	intron, variant, NMD, transcript
rs111794050	19	45302778	A	G	1	0.0376471	0.00404362	280426	5	LDL	CBLC	intron, variant
rs112043381	17	80697523	C	T	1	-0.0325393	0.00380401	4584437	2	HBA1C	FN3K	intron, variant, non, coding, transcript, downstream, gene
rs112072036	11	14561519	A	G	1	0.0885504	0.00591655	526357	1	VITD	PSMA1	intron, variant
rs11264311	1	155054743	A	C	1	-0.0363742	0.00371012	2277	1	GGT	EFNA3	intron, variant, upstream, gene
rs11265260	1	159700039	A	G	1	-0.0907094	0.00389301	496122	1	CRP	.	intergenic, variant
rs11265263	1	159710517	C	A	1	0.0654691	0.00403793	506600	3	CRP	.	intergenic, variant
rs1127343	3	122128394	A	G	1	-0.0326856	0.00423317	445763	2	CAL	FAM162A, WDR5B	intron, variant, downstream, gene
rs112941359	11	14734633	A	C	1	-0.0319117	0.00456228	699471	3	VITD	PDE3B	intron, variant, non, coding, transcript
rs1130564	1	21952884	G	A	1	0.039878	0.00423595	606997	5	ALP	RAP1GAP	synonymous, variant, 5, prime, UTR, non, coding, transcript, exon, upstream, gene, NMD
rs113345881	19	45431636	A	G	1	0.0472248	0.00486894	409284	4	LDL	APOC1P1	intron, variant, non, coding, transcript
rs113407226	2	27486134	G	A	1	-0.0301593	0.00374158	45070	2	TRIG	SLC30A3	upstream, gene, variant, intron
rs11590603	1	65951897	A	G	1	-0.0369908	0.00441022	9840	2	CRP	LEPR, RP4, 630A11.3	intron, variant, upstream, gene
rs11591147	1	55505647	G	T	1	0.0753113	0.00369879	6693	1	LDL	PCSK9	missense, variant, upstream, gene
rs115984621	1	159244544	G	A	1	0.027828	0.00367552	4598475	6	CRP	MPTX1, OR10J2P	upstream, gene, variant, downstream
rs11624069	14	103563547	T	C	1	-0.0901783	0.00437554	694732	1	GGT	EXOC3L4, RP11, 736N17.8	upstream, gene, variant, intron, non, coding, transcript
rs1168002	1	62934308	G	A	1	0.0557893	0.00366615	6675	1	TRIG	DOCK7	intron, variant
rs116843064	19	8429323	G	A	1	-0.0390613	0.00384959	4783	1	HDL	ANGPTL4	missense, variant, 5, prime, UTR, NMD, transcript, non, coding, exon, intron
rs116881820	19	45397952	T	C	1	-0.0649481	0.00405048	375600	2	LDL	TOMM40, CTB, 129P6.4	intron, variant, upstream, gene, downstream, NMD, transcript
rs116980448	12	21180864	A	G	1	0.0449678	0.00373307	297263	2	TBIL	LST3, SLCO1B7, SLCO1B3	intron, variant
rs117119759	9	136212168	G	A	1	-0.0463392	0.0042418	255555	4	ALP	RPL7A, MED22, SNORD36B, SNORD24	upstream, gene, variant, intron, non, coding, transcript, downstream
rs11722627	4	10256259	A	G	1	0.0626502	0.00496457	856651	4	URT	AC006499.8, AC006499.5	downstream, gene, variant
rs11723591	4	9985398	A	T	1	0.0854574	0.0068283	585790	2	URT	SLC2A9	intron, variant, non, coding, transcript, downstream, gene
rs11857386	15	58721168	C	G	1	-0.0289789	0.00397511	88080	3	APOA	LIPC, ALDH1A2	upstream, gene, variant, intron, non, coding, transcript
rs11959928	5	39397132	T	A	1	-0.0341173	0.00370826	109	1	CREA	DAB2, C9	intron, variant, non, coding, transcript, NMD, upstream, gene
rs12047949	1	21842097	G	A	1	0.0291529	0.00409499	496210	8	ALP	ALPL	intron, variant, non, coding, transcript
rs12313279	12	102846504	G	A	1	-0.0495906	0.00408982	534	1	IGF1	IGF1	intron, variant
rs12466997	2	234656517	T	C	1	0.0778085	0.00413569	685432	7	TBIL	UGT1A6, UGT1A10, UGT1A9, UGT1A4, UGT1A5, UGT1A7, UGT1A8, DNAJB3, UGT1A2P, UGT1A3, AC114812.10	intron, variant, NMD, transcript, upstream, gene, non, coding, exon
rs1248897	10	79680991	T	C	1	0.0349537	0.00377361	107834	1	GGT	DLG5	intron, variant
rs1262265	1	21857418	C	T	1	0.0680123	0.00475753	511531	3	ALP	ALPL	intron, variant, non, coding, transcript
rs1262542	6	127032008	A	T	1	-0.0413635	0.00367305	25023	1	IGF1	.	intergenic, variant
rs1263151	11	116641028	T	C	1	0.0413277	0.00484185	242114	1	HDL	BUD13, AP006216.11, AP006216.10	intron, variant, downstream, gene, upstream
rs12741655	1	21898205	A	G	1	0.0331814	0.0043796	552318	7	ALP	ALPL	upstream, gene, variant, intron
rs12937543	17	7458582	T	A	1	0.0653636	0.0046661	369094	2	SHBG	TNFSF12, TNFSF13	intron, variant, NMD, transcript, upstream, gene, non, coding
rs12937634	17	47444442	T	C	1	0.0789277	0.0060313	1949033	1	SHBG	ZNF652, RP11, 1079K10.3, 81K2.1	upstream, gene, variant, downstream, intron, non, coding, transcript
rs12938947	17	7599665	G	A	1	0.0415569	0.00421997	510177	5	SHBG	WRAP53	intron, variant, non, coding, transcript, NMD
rs12940987	17	59269257	A	G	1	0.0275004	0.00367065	7469	2	CREA	BCAS3	intron, variant, non, coding, transcript
rs12958839	18	47145202	A	G	1	0.0275615	0.0037814	39969	3	HDL	.	intergenic, variant
rs13055235	22	44400149	G	A	1	-0.0277309	0.00368885	5035	1	AST	PARVB, SAMM50	intron, variant, non, coding, transcript
rs137976175	5	40908575	G	A	1	0.031719	0.00373324	1324	1	URA	C7, RNU7, 161P	upstream, gene, variant, downstream
rs139184544	6	24139140	T	C	1	0.0329043	0.00367982	401480	3	ALP	NRSN1	intron, variant, non, coding, transcript
rs140011902	19	50026735	G	A	1	0.0361526	0.00373766	12481	1	ALB	FCGRT, RCN3	intron, variant, upstream, gene, non, coding, transcript, downstream, NMD
rs140584594	1	110232983	G	A	1	0.0264791	0.00367955	27	1	APOA	GSTM1, GSTM2, AC000032.2	missense, variant, intron, downstream, gene, non, coding, transcript
rs141159104	7	46746647	C	T	1	-0.0381769	0.00383398	768689	2	IGF1	AC011294.3	intron, variant, non, coding, transcript
rs141737681	1	159205408	C	T	1	0.0294263	0.00365635	1491	6	CRP	.	intergenic, variant
rs143254941	19	45383562	G	A	1	-0.038647	0.00396913	1091469	10	APOB	PVRL2, CTB, 129P6.4	intron, variant, downstream, gene, upstream
rs144018203	11	116916060	G	C	1	-0.0395615	0.0036893	376967	3	TRIG	SIK3	intron, variant, NMD, transcript, non, coding
rs1446976	1	159629194	A	G	1	-0.0409565	0.00378486	4983125	1	CRP	.	intergenic, variant
rs146279568	6	24399218	G	A	1	0.0406563	0.00377705	661558	2	ALP	MRS2	upstream, gene, variant
rs1471633	1	145723739	C	A	1	-0.0313712	0.00370383	1470226	1	URT	PDZK1	upstream, gene, variant
rs149344982	1	21889760	G	A	1	0.110475	0.00378134	543873	1	ALP	ALPL	missense, variant, non, coding, transcript, exon
rs1496499	7	45979023	T	G	1	0.0277215	0.00368291	1065	3	IGF1	.	intergenic, variant
rs1500481	2	234702459	C	T	1	0.0486291	0.00418332	731374	11	TBIL	MROH2A	missense, variant, upstream, gene, non, coding, transcript, exon
rs1562444	11	92715849	A	G	1	0.0293809	0.00379484	48903	1	HBA1C	MTNR1B	3, prime, UTR, variant, intron, downstream, gene
rs1597944	2	234504098	T	C	1	0.153339	0.00393555	533013	2	TBIL	.	intergenic, variant
rs167479	19	11526765	G	T	1	0.0258986	0.0036775	1589	1	SBP	CCDC151, RGL3	downstream, gene, variant, missense, intron, non, coding, transcript, exon, NMD, synonymous, upstream
rs1697421	1	21823292	C	T	1	0.0705286	0.00374937	477405	2	ALP	.	intergenic, variant
rs1736185	19	2813000	A	G	1	-0.0343698	0.00366649	2498505	1	SHBG	THOP1	intron, variant, downstream, gene, non, coding, transcript
rs17616063	16	51436882	A	G	1	0.0487644	0.00367585	73196	1	CRP	.	intergenic, variant
rs17645031	1	109834938	C	T	1	0.0382631	0.00486656	139310	1	APOB	MYBPHL	downstream, gene, variant
rs17712208	1	214150445	T	A	1	-0.0289899	0.00368965	2385	1	HBA1C	PROX1, AS1	intron, variant, non, coding, transcript
rs17779355	10	103928374	G	A	1	0.027048	0.00385598	1815969	1	ALP	NOLC1	downstream, gene, variant
rs17821316	15	58703069	C	A	1	-0.070923	0.00408867	69981	1	APOA	LIPC, ALDH1A2	intron, variant, non, coding, transcript
rs17863753	2	234505264	G	A	1	-0.0377639	0.00375156	534179	12	TBIL	.	intergenic, variant
rs17881850	17	7573057	G	A	1	-0.0301309	0.00393951	483569	6	SHBG	TP53	intron, variant, non, coding, transcript, downstream, gene
rs1800961	20	43042364	C	T	1	0.0367903	0.00366738	396	1	APOA	HNF4A	missense, variant, 3, prime, UTR, NMD, transcript
rs186765281	22	25010855	A	G	1	0.0543752	0.00366141	578125	2	GGT	GGT1, SNRPD3	missense, variant, downstream, gene, NMD, transcript, intron, non, coding, exon
rs187429064	19	19380513	A	G	1	0.0299676	0.00372016	2165	1	LDL	TM6SF2, AC138430.4	missense, variant, non, coding, transcript, exon, upstream, gene
rs190118115	8	19793581	C	T	1	0.0450478	0.00374889	6067	1	APOA	LPL	upstream, gene, variant, intron
rs1926736	10	17891705	G	A	1	0.0956246	0.00413722	547312	1	AST	MRC1L1, MIR511, 1	missense, variant, downstream, gene
rs192957064	11	116538072	G	A	1	-0.0353909	0.00370449	1021	5	TRIG	.	intergenic, variant
rs2006092	22	24995668	A	G	1	-0.149373	0.00401029	562938	1	GGT	GGT1, SNRPD3, AP000356.2	intron, variant, upstream, gene, NMD, transcript, downstream
rs2052285	16	51188432	A	G	1	-0.0259654	0.003711	175254	3	CRP	SALL1, AC009166.5	upstream, gene, variant, downstream
rs2084274	10	71145894	G	A	1	-0.0333128	0.00376409	713509	3	HBA1C	HK1	intron, variant, non, coding, transcript
rs222035	4	72621674	G	T	1	0.0948809	0.00562411	2621861	1	VITD	GC, RNA5SP163	intron, variant, downstream, gene, upstream, non, coding, transcript, NMD
rs2258043	12	121451425	T	C	1	0.0483671	0.00521303	405960	1	CRP	C12orf43	intron, variant, non, coding, transcript, NMD, upstream, gene
rs2297409	9	107576246	G	A	1	0.0322036	0.00391303	27727	2	APOA	ABCA1	intron, variant
rs2298475	11	126278203	T	C	1	0.0456783	0.00378839	71373	1	ALP	ST3GAL4	splice, region, variant, synonymous, non, coding, transcript, exon, 5, prime, UTR, downstream, gene, NMD, upstream
rs2305538	2	234376177	C	T	1	0.0316177	0.00405025	4809	1	CAL	DGKD	intron, variant, NMD, transcript, downstream, gene
rs2477669	10	17806504	A	G	1	-0.0342646	0.00374281	462111	3	AST	TMEM236	intron, variant
rs2490272	6	108895386	T	C	1	0.0294007	0.00381393	15609	1	IGF1	FOXO3	intron, variant
rs2518136	3	186337827	C	T	1	0.0261305	0.00366888	17238	1	CAL	AHSG	intron, variant, downstream, gene
rs2602381	2	234584324	C	T	1	0.134213	0.00443197	613239	3	TBIL	UGT1A10, UGT1A9, UGT1A8	intron, variant
rs2607234	19	35563834	G	A	1	0.0397265	0.00371075	203	1	ALB	HPN, AS1	intron, variant, non, coding, transcript
rs2673127	2	227134379	C	T	1	0.0254468	0.00368195	1634	1	HDL	.	intergenic, variant
rs2708081	12	121463288	T	C	1	-0.0531325	0.00691203	417823	2	CRP	OASL	intron, variant
rs2725244	4	89068761	C	T	1	0.0481138	0.00375655	405447	1	URT	ABCG2	intron, variant
rs2740486	9	107666513	T	G	1	0.0400693	0.00368687	117994	1	APOA	ABCA1	intron, variant
rs2794519	1	159668514	T	C	1	0.0719276	0.00415034	464597	2	CRP	.	intergenic, variant
rs2835268	21	37449136	G	C	1	0.0282189	0.00384781	1816	1	IGF1	CBR1, SETD4, AP000688.14	downstream, gene, variant, intron, upstream, non, coding, transcript
rs28556782	4	145051940	G	A	1	0.0331382	0.004218	459311	1	HBA1C	GYPB, GYPA, RP11, 673E1.4	intron, variant, downstream, gene, NMD, transcript, non, coding
rs2870238	4	77373079	T	C	1	0.0455562	0.00423544	1282	1	CREA	SHROOM3	intron, variant, non, coding, transcript
rs2954021	8	126482077	G	A	1	-0.0443304	0.00367993	4038	1	LDL	RP11, 136O12.2	intron, variant, non, coding, transcript
rs2965169	19	45251156	A	C	1	0.042517	0.00390816	228804	3	LDL	BCL3	upstream, gene, variant, non, coding, transcript, exon
rs2990220	1	155190254	A	T	1	-0.0281589	0.00372268	16021	1	URT	GBAP1	intron, variant, non, coding, transcript, upstream, gene
rs34039247	9	136127956	A	C	1	-0.033883	0.0045842	57838	5	ALP	ABO, RP11, 430N14.4	non, coding, transcript, exon, variant, downstream, gene
rs34592089	4	102926923	G	A	1	0.0254046	0.00367214	2105	1	HDL	BANK1, RP11, 498M5.2	intron, variant, non, coding, transcript
rs34755188	9	104433255	C	T	1	-0.0267215	0.00368052	230296	2	ALP	GRIN3A	missense, variant
rs35160301	10	17877539	C	A	1	0.0511009	0.00388631	533146	2	AST	MRC1L1	intron, variant
rs35732917	7	73013269	T	C	1	0.0319245	0.00369561	1630	1	GGT	MLXIPL	intron, variant, NMD, transcript, upstream, gene, non, coding, downstream
rs365475	6	132055621	C	T	1	-0.0437171	0.0040427	578	1	PHOS	ENPP3	intron, variant
rs3744867	18	56149048	A	G	1	-0.0282159	0.00380446	2001	1	GGT	ALPK2	3, prime, UTR, variant
rs3757840	7	44231216	T	G	1	0.0481493	0.00382248	8474	1	HBA1C	GCK	upstream, gene, variant, intron, non, coding, transcript
rs377719564	16	56932165	G	T	1	-0.0259059	0.00369323	506107	4	HDL	SLC12A3	intron, variant, upstream, gene
rs405509	19	45408836	G	T	1	-0.0702006	0.00511411	386484	1	LDL	APOE, TOMM40	upstream, gene, variant, downstream
rs4076834	2	44081627	T	G	1	0.0314664	0.00373257	5698	1	LDL	ABCG8	intron, variant
rs41277356	10	18291222	A	G	1	0.0316221	0.00375963	946829	4	AST	SLC39A12, AS1	intron, variant, non, coding, transcript, exon, downstream, gene
rs41278174	16	16259596	G	A	1	-0.0291528	0.00367687	5119	1	PHOS	ABCC6	missense, variant, 3, prime, UTR, NMD, transcript
rs4128744	8	19919655	C	T	1	-0.0392881	0.00400956	120007	2	APOA	.	intergenic, variant
rs41301139	18	43262408	G	A	1	-0.0261436	0.00367171	54461	1	URA	SLC14A2, RP11, 116O18.3	missense, variant, intron, non, coding, transcript
rs4151134	17	7347123	T	C	1	0.0519577	0.00483389	257635	3	SHBG	FGF11, CHRNB1, RP11, 104H15.7, 104H15.10, 104H15.8	3, prime, UTR, variant, upstream, gene, downstream, non, coding, transcript, exon
rs4285692	1	159714149	C	T	1	0.0405015	0.00396614	510232	4	CRP	.	intergenic, variant
rs4382717	1	154518610	T	C	1	-0.0287863	0.00376344	2617	2	CRP	UBE2Q1, TDRD10	downstream, gene, variant, intron, non, coding, transcript
rs4485669	3	122234615	G	C	1	0.0652604	0.00575534	114531	1	CAL	KPNA1	upstream, gene, variant
rs4558460	17	7051469	C	T	1	-0.0294183	0.00409248	29165	1	ALP	.	intergenic, variant
rs4655764	1	66126159	C	T	1	0.0814164	0.0056778	164422	1	CRP	.	intergenic, variant
rs4663967	2	234653184	A	C	1	-0.186063	0.00449136	682099	1	TBIL	UGT1A6, UGT1A10, UGT1A9, UGT1A4, UGT1A5, UGT1A7, UGT1A8, DNAJB3, UGT1A2P, UGT1A3, AC114812.9	intron, variant, NMD, transcript, upstream, gene, non, coding, downstream
rs4697950	4	10171644	T	G	1	-0.0706252	0.00831187	772036	5	URT	AC006499.7	upstream, gene, variant
rs4704826	5	156392082	A	C	1	0.026184	0.00366975	177	1	CHO	TIMD4	upstream, gene, variant
rs4711750	6	43757082	T	A	1	-0.0276554	0.00368519	4832	1	TRIG	VEGFA	downstream, gene, variant
rs4731701	7	130430930	C	T	1	-0.0292391	0.00366865	5285	1	HDL	.	intergenic, variant
rs4744712	9	71434707	C	A	1	-0.0328294	0.00366966	1545077	1	CREA	PIP5K1B, RP11, 203L2.4	intron, variant, downstream, gene, NMD, transcript
rs4760699	12	48619044	A	G	1	-0.0525769	0.00633805	224496	1	HBA1C	.	intergenic, variant
rs4783961	16	56994894	A	G	1	0.0717861	0.00387837	303846	2	APOA	CETP, AC012181.1	upstream, gene, variant, downstream
rs4808579	19	17255734	T	C	1	-0.0353512	0.00366945	26848	1	HBA1C	MYO9B	intron, variant
rs492602	19	49206417	G	A	1	-0.0845192	0.00365692	3401	1	ALP	FUT2	synonymous, variant
rs4935968	11	126290950	T	C	1	0.0441024	0.0038103	84120	2	ALP	KIRREL3, ST3GAL4	downstream, gene, variant, intron, non, coding, transcript
rs4962108	9	136096706	A	G	1	-0.0340696	0.00463166	140093	6	ALP	LCN1P1	downstream, gene, variant
rs4979376	9	117158886	G	A	1	0.0341416	0.00366817	425	1	ALT	AKNA, RP11, 9M16.2	upstream, gene, variant, downstream
rs500499	9	136148648	C	G	1	-0.104374	0.00417061	192035	1	ALP	ABO	intron, variant, non, coding, transcript
rs5117	19	45418790	T	C	1	0.0386676	0.00455503	396438	7	LDL	APOC1	intron, variant, NMD, transcript
rs514230	1	234858597	T	A	1	0.0301452	0.00367623	8734	1	LDL	RP4, 781K5.7, LINC01132	downstream, gene, variant, upstream
rs519794	11	116859453	C	T	1	-0.0570785	0.00404397	320360	1	TRIG	SIK3	intron, variant, NMD, transcript, non, coding
rs553779	11	116530376	A	G	1	-0.0336575	0.00465742	352766	3	HDL	AP000770.1	downstream, gene, variant
rs55730499	6	161005610	C	T	1	-0.0295401	0.0037722	96298	1	LDL	LPA	intron, variant
rs55733296	11	30754837	G	A	1	-0.0368106	0.00375448	5030	1	CREA	.	intergenic, variant
rs55781538	2	234637625	T	C	1	-0.0552077	0.00346479	666540	8	TBIL	UGT1A6, UGT1A10, UGT1A9, UGT1A4, UGT1A5, UGT1A7, UGT1A8, UGT1A3	intron, variant, NMD, transcript, non, coding, upstream, gene
rs55891750	2	234660486	C	T	1	-0.0900916	0.0122656	689401	5	TBIL	UGT1A6, UGT1A10, UGT1A9, UGT1A4, UGT1A5, UGT1A7, UGT1A8, AC114812.5, UGT1A2P, UGT1A3, AC114812.10	intron, variant, downstream, gene, NMD, transcript, non, coding
rs55959020	19	17301935	G	A	1	-0.0298427	0.00366855	3108	1	SHBG	MYO9B	synonymous, variant, downstream, gene
rs56341434	2	113868990	C	T	1	0.0268796	0.00368672	2042	1	CRP	IL1RN	intron, variant, non, coding, transcript
rs570071	9	104205038	T	C	1	-0.0368531	0.00368852	2079	1	ALP	.	intergenic, variant
rs5880	16	57015091	G	C	1	0.0823165	0.00381262	324043	1	APOA	CETP	missense, variant
rs5882	16	57016092	A	G	1	-0.0511569	0.00378919	325044	3	APOA	CETP	missense, variant
rs616154	9	136150466	T	C	1	-0.100242	0.00435397	193853	2	ALP	ABO	intron, variant, non, coding, transcript
rs61927807	12	21509694	C	T	1	-0.0316477	0.00422986	626093	7	TBIL	SLCO1A2, IAPP	intron, variant, non, coding, transcript, NMD
rs62104180	2	466003	G	A	1	0.0259727	0.00371549	2480952	1	BMI	.	intergenic, variant
rs62547761	9	91518718	A	T	1	0.036589	0.0036698	15104	1	HBA1C	.	intergenic, variant
rs629001	1	109838918	T	C	1	0.0296786	0.00376406	143290	2	APOB	MYBPHL	missense, variant, intron, non, coding, transcript, exon
rs6519133	22	39096602	T	C	1	0.0271887	0.00366973	1371	1	CRP	JOSD1	5, prime, UTR, variant, intron, non, coding, transcript, exon, upstream, gene
rs653523	1	230318402	C	T	1	0.030489	0.00388704	41205	1	HDL	GALNT2	intron, variant, non, coding, transcript
rs6676143	1	16528218	G	T	1	-0.0380139	0.00456438	77836	1	GGT	ARHGEF19, AS1	intron, variant, downstream, gene, non, coding, transcript
rs6687726	1	154400320	G	A	1	-0.0364143	0.00422979	115673	1	CRP	IL6R	intron, variant, upstream, gene
rs6760182	2	234512078	G	C	1	-0.0512894	0.00348966	540993	10	TBIL	UGT1A11P	upstream, gene, variant
rs6768471	3	121979704	G	A	1	0.0427735	0.00442883	297073	1	CAL	CASR	intron, variant, downstream, gene
rs6794886	3	123085359	C	T	1	0.0272147	0.00375327	2585	1	HBA1C	ADCY5	intron, variant, non, coding, transcript, NMD
rs7000494	8	19873502	G	C	1	0.0316354	0.00430634	73854	3	APOA	.	intergenic, variant
rs7009778	8	41610643	T	C	1	-0.0398991	0.00395606	1566962	1	HBA1C	ANK1	intron, variant
rs7097078	10	71084361	G	A	1	0.032988	0.00423527	651976	4	HBA1C	HK1	intron, variant, non, coding, transcript
rs7126214	11	116679711	G	A	1	0.0295761	0.00374399	140618	6	TRIG	AP006216.5	downstream, gene, variant
rs71454665	12	121198711	C	T	1	-0.0296536	0.00415641	153246	3	CRP	SPPL3, RP11, 173P15.7	downstream, gene, variant, intron, non, coding, transcript
rs71632979	1	161526397	A	G	1	0.0482273	0.00405609	49766	1	TPROT	RP11, 5K23.5, 25K21.6, FCGR3A	intron, variant, non, coding, transcript
rs72636977	11	290891	T	C	1	-0.0271148	0.00370915	2491692	1	ALP	ATHL1, RP11, 326C3.2	upstream, gene, variant, synonymous, non, coding, transcript, exon, intron, NMD, downstream
rs72654472	19	45414392	G	T	1	0.03561	0.00376936	392040	6	LDL	APOE, APOC1	downstream, gene, variant, upstream
rs72658867	19	11231203	G	A	1	0.0489771	0.00368246	491213	2	LDL	LDLR	splice, donor, 5th, base, variant, intron, downstream, gene
rs72740858	15	58705943	A	G	1	-0.0403848	0.00376355	72855	2	APOA	LIPC, ALDH1A2	intron, variant, non, coding, transcript
rs72836561	17	41926126	C	T	1	0.0365555	0.0036719	147712	1	APOA	CD300LG	missense, variant
rs72925817	18	46727935	T	C	1	-0.0664672	0.00792462	377298	2	APOA	DYM, RP11, 30L3.2	intron, variant, upstream, gene
rs7299185	12	4672394	T	G	1	-0.0313606	0.00411385	2479258	1	PHOS	RAD51AP1, DYRK4	downstream, gene, variant, intron, NMD, transcript, upstream
rs73079474	12	21340207	T	C	1	-0.0524648	0.00427736	456606	1	TBIL	SLCO1B1	intron, variant
rs73152509	22	24943369	C	T	1	-0.0420924	0.0038601	510639	3	GGT	GUCD1	intron, variant, NMD, transcript, downstream, gene, upstream, non, coding
rs73607075	16	53828968	T	C	1	0.0268521	0.00378144	12825	2	BMI	FTO	intron, variant, NMD, transcript, non, coding
rs73743304	6	33649461	G	A	1	0.0563843	0.00366666	3947	1	PHOS	ITPR3	intron, variant
rs73936968	19	45395816	G	A	1	-0.0343252	0.00441904	373464	8	LDL	PVRL2, TOMM40, CTB, 129P6.4	downstream, gene, variant, intron, upstream
rs7505828	18	47246485	T	C	1	-0.0356714	0.00373637	141252	1	APOA	.	intergenic, variant
rs75281121	16	56747976	G	C	1	0.0281889	0.00395226	321918	5	HDL	RP11, 343H19.1	intron, variant, non, coding, transcript
rs75507430	2	234518317	C	T	1	0.0530341	0.00349734	547232	9	TBIL	.	intergenic, variant
rs7571337	2	234566418	C	T	1	-0.132096	0.00419591	595333	4	TBIL	UGT1A10, UGT1A8	intron, variant
rs76151543	12	21179263	A	G	1	-0.0293112	0.00369875	295662	6	TBIL	LST3, SLCO1B7, SLCO1B3	intron, variant
rs7662070	4	146809017	T	C	1	-0.0356426	0.00433918	1113	1	GGT	ZNF827	intron, variant, non, coding, transcript, upstream, gene
rs7684895	4	88208266	A	C	1	0.0289378	0.00368355	9783	1	SHBG	.	intergenic, variant
rs7823698	8	41577121	C	G	1	0.037515	0.00430171	1533440	2	HBA1C	ANK1	intron, variant
rs7842602	8	145651888	A	G	1	-0.0266458	0.00366936	2181230	1	ALP	VPS28, TONSL	intron, variant, downstream, gene, non, coding, transcript, exon, NMD
rs7909192	10	71124228	G	A	1	0.107803	0.00425619	691843	2	HBA1C	HK1, AC016821.1	intron, variant, upstream, gene, downstream, non, coding, transcript
rs7912524	10	71098295	A	T	1	-0.116732	0.00432409	665910	1	HBA1C	HK1	intron, variant, non, coding, transcript, exon
rs7929308	11	64329106	C	T	1	-0.0372186	0.00394757	3212	1	URT	SLC22A11	intron, variant, upstream, gene, non, coding, transcript
rs793668	6	24439196	C	G	1	-0.0788268	0.00475598	701536	1	ALP	GPLD1	intron, variant, upstream, gene
rs79701229	19	45384931	G	A	1	-0.0370878	0.00371127	1092838	9	APOB	PVRL2, CTB, 129P6.4	intron, variant, downstream, gene, upstream
rs7972145	12	103477476	T	C	1	0.029484	0.00366786	2421536	1	SHBG	RP11, 328J6.1	intron, variant, non, coding, transcript
rs79954247	4	10353628	T	C	1	-0.0356302	0.00524647	954020	6	URT	.	intergenic, variant
rs8032477	15	99254554	T	C	1	-0.0287106	0.00367113	926991	1	URT	IGF1R	intron, variant, non, coding, transcript
rs8091180	18	77164243	A	G	1	0.0286243	0.00384091	2071881	1	CREA	NFATC1	intron, variant, NMD, transcript
rs8176689	9	136138351	A	C	1	-0.0950049	0.00453851	181738	3	ALP	ABO	intron, variant, non, coding, transcript
rs837763	16	88853729	T	C	1	0.0366057	0.00379113	1836586	1	HBA1C	PIEZO1	upstream, gene, variant
rs838880	12	125261593	T	C	1	-0.0270879	0.00410574	2439	1	HDL	SCARB1	downstream, gene, variant, 3, prime, UTR
rs856567	7	46721448	C	G	1	0.0739666	0.00384558	743490	1	IGF1	AC011294.3	intron, variant, non, coding, transcript
rs856662	3	136668625	C	T	1	-0.0371145	0.00496317	558113	1	SHBG	NCK1, IL20RB	downstream, gene, variant, 3, prime, UTR, intron, non, coding, transcript
rs858519	17	7531965	C	T	1	0.150481	0.00799138	442477	1	SHBG	SAT2, SHBG	upstream, gene, variant, intron
rs9426769	1	21942379	G	C	1	0.0292191	0.00468445	596492	6	ALP	RAP1GAP	intron, variant, downstream, gene, non, coding, transcript, NMD
rs952275	2	21221399	G	T	1	0.0528581	0.00397957	119136	1	LDL	APOB, RP11, 116D2.1	downstream, gene, variant
rs961229	15	96725043	G	A	1	-0.0295258	0.00388553	21255	1	SHBG	NR2F2, AS1	intron, variant, non, coding, transcript
rs9797203	17	16851054	G	A	1	-0.0277944	0.00366894	2187	1	TPROT	TNFRSF13B	intron, variant, non, coding, transcript, NMD
rs9817571	3	122055980	C	T	1	0.0314204	0.00407264	373349	3	CAL	CSTA	intron, variant
rs9834975	3	122117663	A	T	1	0.0722906	0.00792191	2421	2	CAL	FAM162A	intron, variant
rs9905140	17	59496238	C	T	1	-0.0280546	0.00373174	219512	1	CREA	.	intergenic, variant
rs9941279	16	79738834	A	C	1	-0.0262063	0.00367071	7642	1	ALP	RP11, 345M22.1	intron, variant, non, coding, transcript
rs117924672	12	21406025	T	C	1	-0.0310053	0.00398035	522424	4	TBIL	.	intergenic, variant
rs117959945	10	71134934	A	G	1	-0.0262631	0.00380494	702549	5	HBA1C	HK1	intron, variant, non, coding, transcript
rs1584063	3	12266855	G	A	1	0.0267524	0.00367355	35	1	HBA1C	.	intergenic, variant
rs4808959	19	19572108	T	G	1	0.0302499	0.00387469	193760	2	CHO	GATAD2A	intron, variant, upstream, gene, NMD, transcript
rs4886755	15	76298132	G	A	1	0.0257568	0.0037029	8740	1	CREA	NRG4	synonymous, variant, intron, NMD, transcript, non, coding, exon
rs4925659	1	247603463	G	A	1	-0.024263	0.00367788	1688996	1	CRP	NLRP3	intron, variant, upstream, gene
rs7166370	15	60959089	G	C	1	-0.0276141	0.00443091	46801	1	GGT	RORA	intron, variant, NMD, transcript, non, coding
rs7599598	2	97351840	A	G	1	0.0250309	0.00370808	1502453	1	CAL	FER1L5	non, coding, transcript, exon, variant
rs7931398	11	116879676	T	C	1	-0.0309961	0.00422546	3466	2	HDL	SIK3	intron, variant, NMD, transcript, non, coding
rs9427116	1	154631123	C	T	1	-0.0253551	0.00366623	4934957	6	CRP	.	intergenic, variant
rs9482771	6	127446610	G	C	1	-0.024149	0.0036815	6560	1	URA	RSPO3	intron, variant, non, coding, transcript
rs114676109	6	24241601	A	C	1	-0.0297933	0.00421321	503941	5	ALP	DCDC2	intron, variant
rs1386821	1	154382049	T	G	1	0.0251871	0.00373324	264020	7	CRP	IL6R, RP11, 350G8.5, 350G8.7	intron, variant, upstream, gene, downstream
rs1484873	18	43206985	G	A	1	0.024843	0.00367174	962	2	URA	SLC14A2	missense, variant, NMD, transcript
rs1706798	15	45611414	C	T	1	-0.0380518	0.00374587	4253820	1	CREA	CTD, 2651B20.5	downstream, gene, variant
rs2943593	8	76481795	C	T	1	-0.0305224	0.00367503	9612	1	URT	HNF4G	downstream, gene, variant
rs34082659	2	234676409	C	T	1	-0.028656	0.00346125	705324	13	TBIL	UGT1A6, UGT1A1, UGT1A10, UGT1A9, UGT1A8, UGT1A4, UGT1A5, UGT1A7, UGT1A3	intron, variant, NMD, transcript, downstream, gene
rs60746284	19	50012573	C	T	1	0.0274479	0.00398501	1681	2	ALB	FCGRT	upstream, gene, variant, intron, non, coding, transcript
rs9533108	13	43024710	T	C	1	0.0273949	0.00373797	3466	1	ALP	.	intergenic, variant
rs11669173	19	45492559	A	G	1	-0.0253125	0.00374529	86714	3	APOA	CLPTM1	intron, variant, upstream, gene, downstream, non, coding, transcript, NMD
rs174610	11	61627833	A	G	1	-0.0233929	0.00367015	571	1	ALP	FADS2	intron, variant, upstream, gene, non, coding, transcript
rs303936	13	72373889	A	C	1	0.0230942	0.00366919	17819	1	URA	DACH1	intron, variant
rs4719841	7	25997536	A	G	1	-0.0242895	0.00367301	751	1	TRIG	.	intergenic, variant
rs4746834	10	71041806	T	G	1	0.0276311	0.0040377	13022	6	HBA1C	HK1	intron, variant, upstream, gene, non, coding, transcript
rs55921927	2	43848935	A	C	1	0.0245786	0.0036707	9526	1	HBA1C	Y, RNA	upstream, gene, variant
rs7502910	17	1638718	G	A	1	0.0241242	0.00369589	2497141	1	ALB	WDR81, RP11, 961A15.1	intron, variant, downstream, gene, non, coding, transcript
rs7678751	4	7219035	G	A	1	0.0236389	0.00366971	8347	1	IGF1	SORCS2	intron, variant
rs9610630	22	37405865	C	T	1	0.0258017	0.00378152	7511	1	HBA1C	TST, TEX33, Y, RNA	downstream, gene, variant, upstream
rs9989163	14	103235012	G	A	1	0.0259331	0.00368679	471931	1	TPROT	RP11, 661D19.3	downstream, gene, variant
rs10762764	10	79566365	T	G	1	-0.0261424	0.00378953	6792	2	GGT	DLG5	intron, variant, non, coding, transcript, NMD, downstream, gene
rs2284776	7	44216754	T	C	1	0.025032	0.00375892	5988	2	HBA1C	GCK	intron, variant, non, coding, transcript
rs36656	19	54664752	A	C	1	-0.0248681	0.00369539	282508	1	ALP	LENG1, TMC4	upstream, gene, variant, synonymous, non, coding, transcript, exon, downstream
rs5751792	22	24401542	A	G	1	-0.0246058	0.0038599	57472	5	GGT	GSTTP2, AP000351.13	intron, variant, non, coding, transcript, downstream, gene, exon
rs16894893	4	10205595	A	T	1	-0.0974092	0.00692978	482467	3	URT	AC006499.6	upstream, gene, variant
rs1436148	8	23721097	T	C	1	-0.0247857	0.00413896	741	1	CREA	.	intergenic, variant
rs7924080	10	114787012	T	C	1	-0.024483	0.00370747	6845	1	HBA1C	TCF7L2	intron, variant
rs12975366	19	54759361	T	C	1	0.0231265	0.00367366	325295	1	APOA	LILRB5	missense, variant, non, coding, transcript, exon
rs146753693	15	58712067	C	T	1	0.0265317	0.00401824	43519	5	APOA	LIPC, ALDH1A2	intron, variant, non, coding, transcript
rs147438979	17	42061277	G	C	1	0.0240422	0.00366943	4883740	1	HDL	PYY	intron, variant
rs35511894	15	58723709	C	T	1	-0.0243921	0.00371608	90621	4	APOA	LIPC, ALDH1A2, RP11, 355N15.1	upstream, gene, variant, intron, non, coding, transcript, downstream
rs76708468	17	62206299	T	C	1	-0.0244809	0.00376397	847900	1	IGF1	ERN1	intron, variant, non, coding, transcript, 3, prime, UTR
rs10998743	10	71122008	T	A	1	-0.0259504	0.0039427	689623	7	HBA1C	HK1, AC016821.1	intron, variant, downstream, gene, non, coding, transcript
rs561193	11	64353029	A	G	1	-0.0260924	0.00388341	27135	2	URT	.	intergenic, variant
rs2494658	10	101215902	A	T	1	0.025007	0.00386414	7465	2	AST	.	intergenic, variant
rs2917894	6	74567444	A	T	1	0.0231121	0.00368317	261	1	CAL	.	intergenic, variant
rs11821656	11	5689144	G	C	1	-0.0229167	0.00367078	962	1	ALP	TRIM5	intron, variant, NMD, transcript, non, coding
rs5396	3	170744815	T	C	1	0.0265346	0.00367097	80732	1	HBA1C	SLC2A2	upstream, gene, variant
rs8013827	14	105970176	A	G	1	0.0227136	0.00367148	1812579	1	ALB	C14orf80	downstream, gene, variant
rs11849097	14	103547484	C	T	1	0.0273521	0.0040038	678669	2	GGT	.	intergenic, variant
rs2073284	17	76117401	G	A	1	0.0289924	0.00470981	2360263	3	HBA1C	TMC6	intron, variant, downstream, gene, non, coding, transcript, upstream
rs3846662	5	74651084	A	G	1	-0.0496391	0.00369869	369712	1	LDL	HMGCR	intron, variant, downstream, gene, non, coding, transcript, exon, upstream
rs146694641	4	10201600	C	A	1	0.0237652	0.00365084	531558	9	URT	AC006499.6	non, coding, transcript, exon, variant
rs35411407	12	4708908	T	C	1	-0.0224947	0.00369614	2461001	1	PHOS	DYRK4, RP11, 234B24.5	synonymous, variant, downstream, gene, non, coding, transcript, exon
rs62231239	22	25029742	A	G	1	0.0306857	0.00580373	89018	4	GGT	GGT1, BCRP3	downstream, gene, variant, intron, non, coding, transcript
rs138659167	11	71146886	C	G	1	-0.0235514	0.00367001	17182	1	VITD	DHCR7	splice, acceptor, variant, missense, downstream, gene, intron
rs438674	13	113405997	A	C	1	-0.025399	0.00386563	1642714	1	HBA1C	ATP11A, AS1	intron, variant, non, coding, transcript
rs451900	3	64793661	C	T	1	-0.0259599	0.00367111	845	1	URA	ADAMTS9, AS2	intron, variant, non, coding, transcript
rs114323258	4	88661354	C	A	1	-0.0239084	0.00370891	1960	2	URT	Y, RNA	downstream, gene, variant
rs2376583	17	76402105	A	T	1	-0.02243	0.00367007	146844	1	HDL	PGS1	intron, variant, non, coding, transcript, NMD, downstream, gene
rs117693013	11	2198479	G	A	1	-0.0222963	0.00367037	2496312	1	IGF1	MIR4686	downstream, gene, variant
rs11079867	17	47354785	A	C	1	0.0434749	0.00603155	1859376	3	SHBG	.	intergenic, variant
rs28465123	17	65579733	A	C	1	0.0224913	0.00367058	20394	1	URA	PITPNC1	intron, variant, non, coding, transcript
rs2102945	1	21718145	C	T	1	-0.0240534	0.00378008	372258	9	ALP	.	intergenic, variant
rs2207132	20	39142516	G	A	1	-0.0234837	0.00367559	2015	1	LDL	.	intergenic, variant
rs151291132	15	44842210	A	G	1	-0.0253966	0.00369092	7705	1	TRIG	EIF3J	intron, variant, upstream, gene
rs9461209	6	25732302	G	C	1	-0.0320432	0.0048843	55160	2	URT	HIST1H2BA, HIST1H2BPS1, HIST1H2APS1	downstream, gene, variant, non, coding, transcript, exon, upstream
rs588945	5	72441121	G	C	1	-0.0225277	0.00372204	4330	1	URT	RP11, 232L2.2	intron, variant, non, coding, transcript
rs12951345	17	36077863	A	C	1	-0.0225774	0.0036757	14466	1	GGT	HNF1B	intron, variant
rs2252281	17	19437187	T	C	1	-0.0219132	0.00367297	1097003	1	CREA	SLC47A1	5, prime, UTR, variant, upstream, gene, intron, non, coding, transcript, exon
rs2762943	20	52790786	G	T	1	0.0224195	0.00367094	3859	1	VITD	CYP24A1	upstream, gene, variant
rs8104660	19	45191509	C	T	1	0.0316865	0.00379612	899416	12	APOB	CEACAM19, CTB, 171A8.1	downstream, gene, variant, intron, non, coding, transcript
rs112853430	9	107585213	C	T	1	-0.0234268	0.00369356	7488	3	APOA	ABCA1	intron, variant, downstream, gene
rs13283193	9	5626112	A	C	1	-0.0255661	0.00367431	5813	1	ALP	KIAA1432	upstream, gene, variant
rs17162387	1	27293356	T	G	1	0.0253717	0.00374134	2768	1	SHBG	.	intergenic, variant
rs34788376	4	9999054	A	G	1	0.0325668	0.00501911	329012	7	URT	SLC2A9	intron, variant, non, coding, transcript
rs7247349	19	33887160	A	C	1	0.0274625	0.00367377	69970	1	GGT	PEPD	intron, variant, upstream, gene
rs4148768	2	169887154	G	A	1	-0.0291673	0.0038935	2444	1	ALP	ABCB11	intron, variant
rs73267649	10	71126188	C	A	1	-0.0255417	0.00403628	44403	8	HBA1C	HK1, AC016821.1	intron, variant, upstream, gene, downstream, non, coding, transcript
rs7742369	6	34165721	A	G	1	-0.0233655	0.0041502	5684	1	CAL	.	intergenic, variant
rs10025456	4	10140259	T	C	1	-0.0601934	0.00982976	470217	13	URT	RP11, 480G3.1	downstream, gene, variant
rs11688492	2	64865804	T	C	1	0.0234137	0.00377245	93050	1	SHBG	SERTAD2	intron, variant, non, coding, transcript
rs1293261	1	25713234	T	A	1	0.0221204	0.00367311	7423	1	APOB	RHCE	intron, variant, non, coding, transcript, NMD
rs715049	2	217657102	T	C	1	0.022227	0.00367238	3288	1	CREA	RNA5SP120, AC007563.5	downstream, gene, variant, intron, non, coding, transcript
rs78307740	12	21462211	G	A	1	0.0247564	0.0037132	202032	9	TBIL	SLCO1A2	intron, variant, non, coding, transcript, downstream, gene, NMD
rs33918808	9	107579632	C	G	1	-0.023889	0.0038086	31113	3	HDL	ABCA1	missense, variant
rs6445967	3	58282576	T	C	1	0.0329646	0.00426284	42852	1	AST	ABHD6	downstream, gene, variant
rs8133591	21	37437118	A	G	1	-0.0248178	0.00384988	13834	2	IGF1	SETD4, RNU6, 992P, AP000688.11, AP000688.14	upstream, gene, variant, intron, downstream
rs73218799	4	10179079	A	G	1	-0.0390542	0.00599585	372903	7	URT	.	intergenic, variant
rs7002551	8	9178135	T	C	1	-0.0274475	0.00475523	42642	1	ALP	RP11, 115J16.1	intron, variant, non, coding, transcript, upstream, gene
rs1136201	17	37879588	A	G	1	-0.023319	0.0037485	1933	1	CREA	ERBB2, MIR4728	missense, variant, 3, prime, UTR, NMD, transcript, non, coding, exon, upstream, gene, downstream
rs77849807	4	26152727	A	G	1	-0.02191	0.00367315	1917	1	ALB	.	intergenic, variant
rs2893236	7	26038458	T	C	1	0.0228114	0.00367668	2040	1	GGT	.	intergenic, variant
rs314246	17	7040457	C	A	1	-0.0247226	0.00411809	4181	3	ALP	RPL7AP64	upstream, gene, variant
rs1477141	17	53361838	T	G	1	-0.0219184	0.00368448	14574	1	URT	HLF	intron, variant, NMD, transcript, non, coding
rs12445517	16	1843331	A	G	1	0.0275307	0.00412175	2442009	1	IGF1	IGFALS, NUBP2, HAGH, SPSB3	intron, variant, downstream, gene
rs35485101	1	159566170	T	A	1	-0.0282205	0.00370048	4920101	4	CRP	OR10J6P	upstream, gene, variant
rs4736819	8	41509915	T	C	1	0.0236865	0.00388501	934696	4	HBA1C	ANK1, NKX6, 3	downstream, gene, variant, upstream
rs2618567	20	17844492	T	G	1	-0.0221048	0.00373328	3540	1	APOB	.	intergenic, variant
rs10786156	10	96014622	C	G	1	0.0232305	0.0036903	5044	1	SBP	PLCE1	intron, variant
rs11545482	2	70315987	C	T	1	0.0222563	0.00367717	2219	1	IGF1	PCBP1, AS1, AC016700.2	3, prime, UTR, variant, upstream, gene
rs9311400	3	4764171	A	G	1	0.0210248	0.00367729	2498230	1	GGT	ITPR1	intron, variant, upstream, gene, non, coding, transcript
rs73190150	3	122211003	G	C	1	-0.025177	0.00410555	90919	4	CAL	KPNA1	intron, variant, NMD, transcript
rs7551981	1	55719166	T	G	1	0.0252546	0.00383376	206826	2	LDL	.	intergenic, variant
rs10950655	7	17308367	C	T	1	-0.0220041	0.00368557	8854	1	TBIL	.	intergenic, variant
rs9608323	22	25102033	A	G	1	0.0228476	0.00378154	161309	6	GGT	AP000358.5	downstream, gene, variant
rs7523412	1	25294264	G	A	1	0.0213676	0.00367816	2107	1	TPROT	RUNX3, RP11, 84D1.1, 84D1.2	upstream, gene, variant, downstream
rs6538696	12	96374683	T	C	1	0.0211926	0.00368988	5249	1	VITD	HAL	intron, variant, NMD, transcript, downstream, gene, upstream
rs13263508	8	19942181	T	G	1	0.0290179	0.00472704	21471	4	HDL	AC100802.3	intron, variant, non, coding, transcript
rs6108787	20	10967214	T	G	1	-0.0213188	0.00368262	6675	1	DBP	RP11, 103J8.1	upstream, gene, variant, intron, non, coding, transcript
rs93139	11	9759608	C	T	1	0.0224327	0.00416116	9079	1	SBP	SWAP70	intron, variant, non, coding, transcript, NMD
rs6492723	13	95273125	T	A	1	-0.0210931	0.00368418	5049	1	ALP	GPR180	intron, variant
rs1169293	12	121426545	A	G	1	0.0242292	0.00431765	2973	1	SHBG	HNF1A	intron, variant, NMD, transcript
rs2744595	6	24530337	C	G	1	0.0237825	0.00399526	281422	6	ALP	ALDH5A1	intron, variant, non, coding, transcript, upstream, gene
rs28381983	2	27804432	T	C	1	-0.0282774	0.00552622	1117	1	GGT	ZNF512, AC074091.1, C2orf16, RP11, 158I13.2	upstream, gene, variant, downstream, missense
rs56899077	8	145996452	C	G	1	0.0290749	0.00378483	2356485	1	ALT	ZNF34	downstream, gene, variant
rs11731894	4	40583139	G	T	1	0.0208844	0.00368542	4276	1	CAL	RBM47	intron, variant, NMD, transcript, non, coding
rs2374270	7	151402790	C	A	1	-0.0212731	0.00368995	360	1	URA	PRKAG2	intron, variant, non, coding, transcript, NMD
rs73056079	19	50022939	T	C	1	0.0283298	0.00474616	819923	2	TPROT	FCGRT	intron, variant, non, coding, transcript, NMD
rs2235215	6	16131156	T	C	1	0.02092	0.00368746	761	1	LDL	MYLIP	intron, variant
rs13430620	2	169768891	A	C	1	0.0227339	0.00389943	861	1	HBA1C	G6PC2, SPC25	downstream, gene, variant, intron, non, coding, transcript
rs2546494	17	46959525	A	G	1	-0.0217577	0.00368966	14508	2	HDL	SNORA68, RP11, 463M16.5, SUMO2P17	downstream, gene, variant, intron, non, coding, transcript
rs11057223	12	123755055	T	C	1	-0.0237566	0.00377827	768	1	APOA	CDK2AP1	intron, variant, upstream, gene
rs898103	17	80845827	G	C	1	-0.0328167	0.00403283	2438695	1	HBA1C	TBCD	intron, variant, non, coding, transcript
rs4773144	13	110960712	A	G	1	0.0208559	0.00369112	428120	1	TPROT	COL4A2, COL4A1	intron, variant, upstream, gene, non, coding, transcript
rs2050525	1	221066985	T	A	1	0.0216462	0.00370461	15925	1	IGF1	.	intergenic, variant
rs11190410	10	101931189	A	T	1	-0.0231916	0.00383418	235585	2	ALT	ERLIN1	intron, variant
rs2965174	19	45245015	G	A	1	0.0312901	0.00382613	952922	13	APOB	.	intergenic, variant
rs1869026	2	121341281	A	C	1	-0.0203811	0.00369584	2808	1	URT	.	intergenic, variant
rs1834036	16	71972060	G	A	1	-0.0219858	0.00373727	6762	1	APOB	PKD1L3	intron, variant, non, coding, transcript
rs6086540	20	8603950	C	G	1	-0.0205843	0.00369724	5020	1	HBA1C	PLCB1	intron, variant
rs11574736	20	43039537	G	C	1	0.0209334	0.00370085	946	1	SHBG	HNF4A, MIR3646	intron, variant, NMD, transcript, downstream, gene
rs17863786	2	234607863	A	G	1	0.0255523	0.00386028	636778	14	TBIL	UGT1A6, UGT1A10, UGT1A9, UGT1A7, UGT1A8, AC114812.8	intron, variant, non, coding, transcript, NMD
rs56412759	8	81418949	A	G	1	0.0204297	0.00371027	5569	1	DBP	ZBTB10	intron, variant
rs2325917	1	159221138	G	A	1	-0.0266888	0.00489785	4682024	3	CRP	.	intergenic, variant
rs10413792	19	50115031	A	T	1	0.0228806	0.00401764	91952	4	ALB	PRR12	intron, variant
rs6600898	4	69997684	C	G	1	0.0225761	0.00370133	2559765	2	VITD	RP13, 644M16.3	intron, variant, non, coding, transcript
rs34955778	16	15139594	T	C	1	-0.0212445	0.00372007	371	1	TRIG	NTAN1, PDXDC1	intron, variant, NMD, transcript, non, coding, exon, downstream, gene
rs1790324	11	71150520	T	G	1	0.0485832	0.00487564	13548	2	VITD	DHCR7	intron, variant, upstream, gene, downstream, non, coding, transcript
rs2283371	14	73015668	A	G	1	-0.0213254	0.0037148	5750	1	CRP	RGS6, RP3, 514A23.2	intron, variant, non, coding, transcript, NMD, downstream, gene
rs142597930	16	1858403	A	G	1	0.0231729	0.00372602	2497953	1	IGF1	HAGH	downstream, gene, variant, intron
rs12466350	2	25239969	T	C	1	-0.0275311	0.00374194	140587	1	BMI	DNAJC27, AS1	intron, variant, non, coding, transcript
rs9368364	6	21905643	A	T	1	0.0206252	0.00370973	5246	1	GGT	CASC15	intron, variant, non, coding, transcript
rs11735662	4	145026126	C	T	1	0.0242506	0.0038911	17585	2	HBA1C	GYPB, GYPA, RP11, 673E1.4	intron, variant, downstream, gene, non, coding, transcript
rs3809814	17	7225149	C	G	1	-0.0227693	0.00394966	180511	4	ALP	RP11, 542C16.2, NEURL4	upstream, gene, variant, intron, downstream, non, coding, transcript, exon, NMD
rs185474100	12	3997689	G	A	1	-0.0200867	0.00371285	2492659	1	CAL	RP11, 664D1.1	intron, variant, non, coding, transcript
rs149913193	1	159317442	A	T	1	0.0301167	0.00376856	4671373	3	CRP	RP11, 550P17.5, OR10J7P	intron, variant, non, coding, transcript, upstream, gene
rs1461410	15	53984796	T	C	1	0.0208654	0.00371587	16844	1	CREA	WDR72	intron, variant
rs222837	17	7132556	C	T	1	-0.0233897	0.00398054	1784	5	ALP	DVL2, ACADVL	synonymous, variant, downstream, gene, upstream, non, coding, transcript, exon
rs11102523	1	113261085	G	A	1	-0.0212114	0.00372126	4446	1	CREA	PPM1J, FAM19A3, RP11, 426L16.9	upstream, gene, variant, downstream
rs532727118	12	21437223	G	A	1	0.0305237	0.00474637	177044	8	TBIL	SLCO1A2	intron, variant, non, coding, transcript, NMD
rs11650232	17	7088923	A	G	1	0.0234358	0.00418548	44285	2	ALP	DLG4	downstream, gene, variant
rs371097739	15	58638579	C	T	1	-0.0217955	0.00378882	92494	7	APOA	ALDH1A2	intron, variant, non, coding, transcript
rs484959	1	110366083	C	T	1	-0.0203403	0.00372153	8745	1	TPROT	RP4, 735C1.6	upstream, gene, variant
rs6440658	3	149962014	A	G	1	0.0200094	0.00372168	2228	1	SHBG	RP11, 167H9.6	downstream, gene, variant
rs141881700	12	101056213	G	A	1	0.0211497	0.00373029	273	2	SHBG	.	intergenic, variant
rs9462860	6	42947013	C	G	1	0.0258464	0.00378255	42452	1	APOA	PEX6	upstream, gene, variant
rs10844075	12	32121276	T	G	1	0.0214034	0.00375269	1116597	1	IGF1	KIAA1551	intron, variant, non, coding, transcript
rs1838209	2	26895947	G	A	1	-0.0201298	0.00373014	2267	1	SBP	AC015977.6	intron, variant, non, coding, transcript
rs147085961	7	98029427	C	A	1	0.0201663	0.00373629	10885	1	SHBG	BAIAP2L1	intron, variant, non, coding, transcript, exon
rs4803356	19	41207206	C	G	1	-0.0226398	0.00377012	8523	1	ALP	ADCK4	intron, variant, downstream, gene, non, coding, transcript, exon
rs3770591	2	169837800	A	G	1	0.0245669	0.00398214	51798	2	ALP	ABCB11	intron, variant
rs79787170	15	58754942	A	G	1	-0.021432	0.00383745	22478	6	APOA	LIPC, ALDH1A2, RP11, 355N15.1	intron, variant, non, coding, transcript
rs99595	20	55989808	C	T	1	-0.0201368	0.00375118	2571	1	HBA1C	.	intergenic, variant
rs10134692	14	93912668	A	C	1	0.0220762	0.00377552	8467	1	BMI	UNC79	intron, variant
rs34407651	3	122289844	C	T	1	0.021472	0.00388174	165885	5	CAL	DTX3L	intron, variant
rs118157850	12	21142621	G	A	1	0.0272229	0.00438763	294984	11	TBIL	LST3, SLCO1B3, SLCO1B7	intron, variant
rs17318886	8	126346926	C	T	1	-0.0208987	0.00377791	4702	2	HDL	NSMCE2	intron, variant
rs1474296	6	166340770	G	C	1	0.0251645	0.00434254	213705	1	IGF1	LINC00473, PDE10A	intron, variant, non, coding, transcript
rs13194491	6	27037080	C	T	1	0.0237165	0.00447684	3083	1	HBA1C	.	intergenic, variant
rs111925401	2	27506832	C	T	1	-0.0215014	0.00382081	65768	6	TRIG	DNAJC5G, TRIM54	downstream, gene, variant, intron
rs722677	5	42748289	A	G	1	0.0224564	0.00384497	670578	1	IGF1	.	intergenic, variant
rs76362353	2	27513678	C	T	1	-0.0229762	0.0038832	72614	5	TRIG	TRIM54	intron, variant
rs12340741	9	136107529	A	G	1	0.0224064	0.00414087	48738	7	ALP	LCN1P1	upstream, gene, variant
rs1801274	1	161479745	G	A	1	0.021967	0.0040452	216819	2	TPROT	FCGR2A, RP11, 25K21.6	missense, variant, upstream, gene, NMD, transcript, non, coding, exon, downstream, 3, prime, UTR
rs118050111	12	21407915	C	A	1	0.022458	0.00393073	147736	12	TBIL	.	intergenic, variant
rs7016223	8	120056819	T	C	1	-0.0281967	0.00399945	309033	1	ALP	COLEC10	intron, variant, non, coding, transcript
rs7948108	11	323507	A	G	1	-0.0207332	0.00390482	2459076	2	ALP	IFITM3, RP11, 326C3.11, 326C3.12, 326C3.10, 326C3.14, 326C3.13	upstream, gene, variant, downstream, intron, non, coding, transcript
rs12528678	6	158398815	G	T	1	-0.0200746	0.00381783	659	1	GGT	SYNJ2	upstream, gene, variant
rs187929675	11	117111368	C	T	1	0.021267	0.00396235	247785	8	TRIG	RNF214	intron, variant, non, coding, transcript, downstream, gene
rs4335137	8	19878874	A	T	1	-0.0275525	0.00557946	8197	5	APOA	.	intergenic, variant
rs6603859	1	16706075	T	G	1	0.0231158	0.00443868	255693	2	GGT	SZRD1	intron, variant, non, coding, transcript, NMD
rs12754932	1	159348545	G	C	1	-0.0234614	0.00394364	4779398	6	CRP	RP11, 550P17.5	intron, variant, non, coding, transcript
rs12609436	19	19743098	C	T	1	0.0214735	0.00404822	203137	3	CHO	GMIP, LPAR2	intron, variant, upstream, gene, downstream
rs7583126	2	21100867	A	G	1	0.0208383	0.00393962	429734	2	APOB	.	intergenic, variant
rs4672255	2	58898663	G	A	1	0.0200057	0.00385098	2974	1	BMI	LINC01122	intron, variant, non, coding, transcript
rs17200816	6	31566840	C	T	1	0.0206037	0.00388897	4532843	2	HBA1C	.	intergenic, variant
rs3808457	8	116589497	A	T	1	0.0223836	0.00389371	16166	1	APOA	TRPS1	intron, variant
rs2076313	6	24551624	A	G	1	0.0223224	0.0045111	123036	9	ALP	KIAA0319	intron, variant
rs4576329	7	18007152	G	A	1	-0.0227979	0.00390601	8724	1	ALB	RNMTL1P2	downstream, gene, variant
rs1043263	19	49949589	A	T	1	-0.0236389	0.00430257	73490	3	ALB	SLC17A7, PIH1D1	upstream, gene, variant, 3, prime, UTR, non, coding, transcript, exon, downstream, NMD
rs4894806	3	171818000	A	G	1	0.0202651	0.00386418	1016	2	HBA1C	FNDC3B	intron, variant, non, coding, transcript
rs9994887	4	69537475	A	G	1	0.0232429	0.00398216	9137	1	GGT	UGT2B15	upstream, gene, variant
rs140231532	11	116697301	C	T	1	-0.0229778	0.00490437	216883	7	TRIG	APOC3, APOA4	upstream, gene, variant
rs78544409	11	116868126	G	A	1	0.0214663	0.00419056	46058	10	TRIG	SIK3	intron, variant, NMD, transcript, non, coding
rs522951	10	102110901	G	C	1	0.0199477	0.0039131	2114220	2	ALP	SCD, RP11, 34D15.2	intron, variant, upstream, gene
rs11122400	1	230280259	C	G	1	-0.0210594	0.00412179	44055	2	HDL	GALNT2	intron, variant, non, coding, transcript
rs10937926	4	3469341	G	A	1	-0.020268	0.0040168	2499966	2	ALB	DOK7	intron, variant, non, coding, transcript
rs117071055	12	21040276	T	C	1	0.0215184	0.00402302	206969	13	TBIL	SLCO1B3, LST3, SLCO1B7	intron, variant
rs491443	2	169769027	A	C	1	-0.023756	0.0045345	997	2	HBA1C	G6PC2, SPC25	downstream, gene, variant, intron, non, coding, transcript
rs4766897	12	112179471	C	T	1	-0.0232521	0.00412982	1166	1	TBIL	ACAD10	intron, variant, non, coding, transcript, upstream, gene
rs2229643	6	33660597	C	T	1	0.0269182	0.00421473	2203	2	PHOS	UQCC2, ITPR3, SBP1	downstream, gene, variant, synonymous
rs72830895	6	24315442	A	G	1	-0.0210661	0.00417371	130136	7	ALP	DCDC2	intron, variant
rs2732439	12	48744199	A	C	1	0.0324985	0.00672057	116082	3	HBA1C	ZNF641, RP11, 370I10.6	intron, variant, 5, prime, UTR, upstream, gene
rs943329	10	18269875	T	G	1	0.0214567	0.00429992	14276	5	AST	SLC39A12	intron, variant
rs205755	7	130580343	C	T	1	-0.0208637	0.00407553	3406	1	IGF1	MIR29A, AC016831.7	intron, variant, non, coding, transcript
rs4281505	11	14800660	A	G	1	0.0625303	0.00702712	676024	2	VITD	PDE3B	intron, variant, downstream, gene
rs112882912	1	159581293	C	T	1	-0.0201033	0.00403562	48423	7	CRP	.	intergenic, variant
rs111231035	1	159253133	T	C	1	-0.0200626	0.00410353	4737140	7	CRP	OR10J2P	upstream, gene, variant
rs4742924	9	107601276	A	G	1	-0.0212123	0.0041795	7403	4	HDL	ABCA1	intron, variant
rs67116466	4	72581810	T	C	1	-0.0238987	0.0051737	94868	3	VITD	.	intergenic, variant
rs7893985	10	101893418	G	A	1	0.0376968	0.00510911	272098	1	ALT	.	intergenic, variant
rs79447951	15	58735638	T	G	1	-0.0204831	0.00421904	3174	9	APOA	LIPC, ALDH1A2, RP11, 355N15.1	intron, variant, non, coding, transcript
rs117805502	8	19868511	C	T	1	-0.0209846	0.00433966	70084	6	HDL	.	intergenic, variant
rs191270456	1	21814037	C	G	1	-0.0198294	0.0041211	154842	10	ALP	NBPF3	downstream, gene, variant
rs148970147	16	56690085	A	T	1	0.0199684	0.00412665	370368	9	HDL	MT1B, MT1F, RP11, 249C24.11	downstream, gene, variant, upstream
rs374597	22	18437043	C	T	1	0.023125	0.00431757	1305130	1	GGT	MICAL3	intron, variant, NMD, transcript
rs72884870	2	169773338	T	G	1	-0.0196692	0.00412888	5308	3	HBA1C	SPC25	upstream, gene, variant
rs6724525	2	169800797	G	A	1	-0.0196692	0.00414495	32767	4	HBA1C	ABCB11	intron, variant, NMD, transcript
rs6843222	4	72669944	C	T	1	-0.0210073	0.0042188	50871	4	VITD	GC	upstream, gene, variant
rs113487566	1	51599038	C	T	1	-0.0250628	0.00440318	2151	1	CAL	C1orf185	intron, variant, downstream, gene
rs4845612	1	154358583	T	C	1	0.0198186	0.00415884	152012	1	TPROT	.	intergenic, variant
rs117474805	12	20889186	C	A	1	0.0212682	0.00428694	300357	14	TBIL	SLCO1C1	intron, variant, NMD, transcript
rs1436959	15	62338820	T	C	1	-0.0254212	0.00492326	2391	1	IGF1	VPS13C	intron, variant
rs142039417	17	61988614	A	T	1	-0.0216452	0.00442944	630215	3	IGF1	CSHL1	5, prime, UTR, variant, upstream, gene, intron, non, coding, transcript, exon
rs2304812	9	133488447	G	A	1	0.0193071	0.00411356	2625954	8	ALP	FUBP3	intron, variant, downstream, gene
rs7105853	11	14877948	G	A	1	-0.0295192	0.0058406	15211	3	VITD	PDE3B	intron, variant
rs114847096	4	10022161	A	C	1	-0.0284104	0.00498029	352119	6	URT	SLC2A9	intron, variant, non, coding, transcript, upstream, gene
rs73398514	11	323139	T	C	1	-0.0192944	0.00422207	2459444	3	ALP	IFITM3, RP11, 326C3.11, 326C3.12, 326C3.10, 326C3.14, 326C3.13	upstream, gene, variant, downstream, intron, non, coding, transcript
rs34371877	3	122001746	C	T	1	-0.0202086	0.0043046	28437	5	CAL	CASR, AC068754.1	intron, variant, downstream, gene
rs66716313	8	145995765	A	G	1	0.0202443	0.00434855	2355798	2	ALT	ZNF34	downstream, gene, variant
rs74093817	14	106188103	C	T	1	0.0191044	0.00424434	3425022	2	TPROT	IGHEP1	downstream, gene, variant, intron, non, coding, transcript
rs71441063	2	27444546	T	C	1	-0.03594	0.00551271	3482	1	TRIG	CAD, ATRAID	intron, variant, downstream, gene, upstream
rs4268379	1	109778237	T	C	1	0.0207132	0.00460176	48082	4	APOB	SARS	intron, variant, upstream, gene, downstream
rs1621710	12	48386060	T	C	1	-0.0289404	0.00520937	242057	2	HBA1C	COL2A1	intron, variant, upstream, gene
rs2000069	9	107635869	C	T	1	0.0206205	0.00447536	221	1	CHO	ABCA1	intron, variant
rs3769891	2	165602181	A	G	1	0.0196727	0.00446058	4690	1	TRIG	COBLL1	intron, variant, non, coding, transcript, NMD
rs7621308	3	136275528	G	A	1	0.0328873	0.00762615	3498	2	TBIL	STAG1	intron, variant, non, coding, transcript, NMD
rs116926994	13	43077245	A	G	1	0.0196111	0.00442626	49069	2	ALP	.	intergenic, variant
rs2806033	14	73424814	T	C	1	-0.0197113	0.00442213	403396	2	CRP	DCAF4, RP11, 109N23.6	intron, variant, NMD, transcript, 3, prime, UTR, upstream, gene
rs3897644	18	57729069	T	C	1	-0.0203735	0.00457545	3815	1	BMI	.	intergenic, variant
rs34345884	3	49760431	G	C	1	-0.0205324	0.00459851	349	1	HBA1C	GMPPB, AMIGO3, IP6K1, RNF123	missense, variant, upstream, gene, downstream, non, coding, transcript, exon, 5, prime, UTR
rs74729891	3	121933063	C	A	1	0.0191592	0.00453418	40246	4	CAL	CASR	intron, variant
rs192267	12	115552508	T	G	1	-0.0186593	0.00447455	3839748	1	DBP	.	intergenic, variant
rs6088618	20	33409350	G	A	1	-0.0260932	0.0054317	521479	1	CREA	NCOA6	intron, variant, 5, prime, UTR
rs78595509	12	121595453	T	C	1	-0.0191541	0.00461266	402226	4	CRP	P2RX7	intron, variant, NMD, transcript, non, coding
rs599041	13	43184390	A	G	1	-0.0187383	0.00457628	156214	3	ALP	TNFSF11	downstream, gene, variant
rs12904989	15	51262058	G	A	1	0.0201848	0.0047416	976	1	PHOS	AP4E1	intron, variant, NMD, transcript
rs12631135	3	123102950	G	C	1	-0.0189234	0.0046763	20176	2	HBA1C	ADCY5	intron, variant, non, coding, transcript, NMD
rs28458819	3	136522314	A	G	1	-0.0367468	0.00852265	411802	3	SHBG	.	intergenic, variant
rs112354651	10	71079568	G	C	1	-0.0203557	0.00514661	407012	10	HBA1C	HK1	intron, variant, non, coding, transcript
rs314252	17	7092506	G	A	1	-0.0191908	0.00487034	38266	6	ALP	DLG4	downstream, gene, variant
rs2053595	17	7029549	G	A	1	0.0204898	0.005207	101223	7	ALP	.	intergenic, variant
rs112017324	19	17437962	C	G	1	-0.0184202	0.00471247	132919	2	SHBG	ANO8, DDA1	intron, variant, downstream, gene, NMD, transcript
rs9295122	6	160570013	C	T	1	0.019119	0.00490956	339299	3	LDL	SLC22A1	intron, variant, NMD, transcript
rs7176909	15	96707171	G	C	1	0.0191447	0.00494692	15444	2	SHBG	NR2F2, AS1	intron, variant, non, coding, transcript
rs842872	4	72695059	A	G	1	0.0245762	0.00623231	361834	5	VITD	.	intergenic, variant
rs114310991	1	161718609	G	A	1	0.0195949	0.0050333	241978	3	TPROT	DUSP12	upstream, gene, variant
rs4681678	3	58327899	A	T	1	0.0283691	0.00625208	83585	2	AST	PXK	intron, variant, NMD, transcript
rs7212989	17	7674850	T	C	1	-0.0209093	0.00545203	136803	11	SHBG	DNAH2	intron, variant, NMD, transcript
rs10857424	4	146711553	G	A	1	0.0200986	0.00531665	98577	2	GGT	ZNF827	intron, variant
rs10946798	6	25781853	G	T	1	-0.0380188	0.0102488	5609	1	URT	SLC17A1, SLC17A4	downstream, gene, variant
rs9385737	6	136080517	A	C	1	-0.0182299	0.00483515	3888055	3	PHOS	.	intergenic, variant
rs1717200	15	41368334	A	G	1	-0.0199953	0.00509218	4432673	2	CREA	INO80	intron, variant, NMD, transcript, upstream, gene
rs17269250	15	58725986	T	G	1	-0.0187416	0.00499718	87421	8	APOA	LIPC, ALDH1A2, RP11, 355N15.1	intron, variant, non, coding, transcript, downstream, gene
rs62623385	17	7847837	A	T	1	0.0367589	0.00778247	583921	4	SHBG	CNTROB	intron, variant, missense, downstream, gene, NMD, transcript, upstream, non, coding, exon
rs350912	19	4098776	G	A	1	-0.0177794	0.00491105	1212729	2	SHBG	MAP2K2	intron, variant, downstream, gene, non, coding, transcript
rs7544010	1	176792798	A	G	1	0.0197072	0.00546528	1746	2	IGF1	PAPPA2	intron, variant, non, coding, transcript
rs568490059	6	132032331	G	A	1	0.0184943	0.00512566	160131	2	PHOS	CTAGE9, ENPP3	upstream, gene, variant, intron
rs9411500	9	136172187	A	G	1	0.0222304	0.00616263	57786	9	ALP	.	intergenic, variant
rs117331519	7	44352509	G	T	1	0.0187085	0.00512868	89992	3	HBA1C	CAMK2B	intron, variant, NMD, transcript, non, coding
rs560387216	16	56828314	A	G	1	0.018428	0.00514256	232139	11	HDL	NUP93	intron, variant, non, coding, transcript
rs16965150	16	57059484	C	T	1	-0.0183685	0.00515029	969	12	HDL	NLRC5	missense, variant, upstream, gene, downstream, NMD, transcript
rs8192726	19	41354496	C	A	1	-0.0179836	0.00512783	138767	2	ALP	CYP2A6, CTC, 490E21.12	intron, variant, non, coding, transcript, upstream, gene, NMD
rs72912550	18	46915589	T	A	1	0.0492254	0.0125806	330743	4	APOA	DYM	intron, variant, NMD, transcript, non, coding, downstream, gene
rs4671611	2	64967175	A	G	1	-0.0180827	0.00518173	8321	2	SHBG	SERTAD2	intron, variant, non, coding, transcript
rs12454232	18	77157017	G	T	1	0.0180808	0.00524758	2064655	2	CREA	NFATC1	intron, variant, upstream, gene
rs231543	17	41940360	T	G	1	0.0178428	0.00519945	115721	4	HDL	CD300LG	3, prime, UTR, variant, downstream, gene
rs12484530	22	44409993	G	A	1	-0.0179754	0.00523071	4809	3	AST	PARVB, SAMM50	intron, variant, downstream, gene
rs146390218	19	45478352	A	G	1	0.0272307	0.00696732	1186259	14	APOB	CLPTM1	intron, variant, downstream, gene, non, coding, transcript
rs7253956	19	33392490	C	T	1	-0.0183162	0.00546963	7472	2	CREA	CEP89	intron, variant, NMD, transcript
rs701035	12	125006068	C	T	1	0.0177732	0.00531073	273898	5	HDL	NCOR2	intron, variant, upstream, gene, non, coding, transcript
rs72788346	10	9356353	G	A	1	-0.0211968	0.0063347	43034	2	CAL	.	intergenic, variant
rs186782888	11	117086701	G	A	1	-0.0201444	0.00611031	172517	9	TRIG	PCSK7	intron, variant, non, coding, transcript, downstream, gene, exon
rs72875499	4	88762112	G	A	1	-0.0174769	0.00538362	98798	3	URT	MEPE	intron, variant, non, coding, transcript
rs72773105	16	57028758	A	G	1	0.018079	0.00564708	29987	8	HDL	NLRC5	intron, variant, downstream, gene, non, coding, transcript, NMD
rs11820062	11	65429936	T	C	1	-0.0198104	0.00591039	1086663	3	URT	RELA	intron, variant, non, coding, transcript, NMD, upstream, gene, 5, prime, UTR
rs973307	10	17246333	T	C	1	0.0175416	0.005432	1002900	6	AST	TRDMT1	upstream, gene, variant
rs9678093	2	73691144	A	C	1	0.0232104	0.00664512	2986	1	CREA	ALMS1, IT1	intron, variant, downstream, gene, NMD, transcript, non, coding
rs7251963	19	7170241	C	T	1	-0.0170305	0.00546246	1858736	3	SHBG	INSR	intron, variant, non, coding, transcript, upstream, gene
rs77454872	17	45509496	G	A	1	0.0270936	0.00749023	1941146	2	SHBG	EFCAB13	intron, variant, downstream, gene
rs11779019	8	9229139	T	G	1	-0.0197021	0.00645703	8362	3	ALP	RNU6, 526P, RP11, 115J16.1, 115J16.2	upstream, gene, variant, downstream, intron, non, coding, transcript
rs1801689	17	64210580	A	C	1	-0.0222419	0.0065107	1065	1	APOB	APOH	missense, variant, downstream, gene, intron
rs112201339	22	44371571	C	T	1	-0.0180108	0.00570848	33613	2	AST	SAMM50	intron, variant, non, coding, transcript, exon, downstream, gene
rs118002512	16	1974431	A	G	1	-0.017566	0.00571451	2310909	3	IGF1	.	intergenic, variant
rs4710938	6	20640904	A	G	1	0.0182783	0.00583161	4736762	4	HBA1C	CDKAL1	intron, variant
rs11585450	1	161696782	C	G	1	0.0181904	0.0059118	168847	4	TPROT	FCRLB	missense, variant, splice, region, synonymous, non, coding, transcript, exon
rs138293199	2	169688112	A	C	1	-0.0173897	0.00567422	79918	5	HBA1C	NOSTRIN, SPC25	intron, variant, downstream, gene
rs78554895	10	65153193	T	C	1	0.0211635	0.00646728	384928	2	ALP	JMJD1C	intron, variant
rs711972	3	136110018	C	T	1	0.0330521	0.0099603	494	2	SHBG	STAG1	intron, variant, NMD, transcript
rs62281226	3	172191689	G	T	1	0.0219471	0.00739886	35050	2	IGF1	.	intergenic, variant
rs56360822	17	7264027	G	A	1	0.0174025	0.00571862	174539	8	SHBG	TMEM95	downstream, gene, variant
rs11731759	4	9872456	G	C	1	-0.0215951	0.00720659	202414	0	URT	SLC2A9	intron, variant, non, coding, transcript
rs34374273	19	45338895	G	A	1	-0.0254742	0.00768812	1046802	15	APOB	.	intergenic, variant
rs80190677	1	159347781	A	C	1	-0.0175476	0.00598116	4778634	9	CRP	RP11, 550P17.5	intron, variant, non, coding, transcript
rs11722561	4	100088737	A	T	1	-0.0205733	0.00657604	4313	1	ALP	RP11, 696N14.1	intron, variant, non, coding, transcript
rs116808516	4	72850632	T	G	1	-0.0175566	0.00598953	231559	6	VITD	.	intergenic, variant
rs17418883	10	9619250	G	C	1	0.0187164	0.00637184	305931	3	CAL	.	intergenic, variant
rs130626	22	37438910	C	T	1	0.0170954	0.00592245	25534	2	HBA1C	.	intergenic, variant
rs1265565	12	111715197	C	T	1	-0.0232719	0.00763515	2437	4	DBP	CUX2	intron, variant
rs7393121	10	5268003	A	C	1	-0.0230614	0.00749061	19051	1	IGF1	.	intergenic, variant
rs117863166	12	21356736	T	C	1	0.0227744	0.00747635	361415	10	TBIL	SLCO1B1	intron, variant
rs113467192	1	66163796	C	T	1	-0.021474	0.007185	179344	3	CRP	.	intergenic, variant
rs478575	5	72339109	T	C	1	0.0268508	0.00855219	698	1	AST	FCHO2	intron, variant
rs1672907	12	125283403	A	G	1	-0.0172422	0.00620432	1529116	3	APOA	SCARB1	intron, variant, non, coding, transcript
rs4843766	16	88015663	T	C	1	-0.018937	0.00659624	1421344	1	SHBG	BANP	intron, variant, downstream, gene, NMD, transcript, upstream, non, coding
rs79564131	22	44371007	G	C	1	-0.0166575	0.00615052	34177	4	AST	SAMM50	intron, variant, non, coding, transcript, exon, downstream, gene
rs78397456	8	119746935	G	A	1	-0.0164897	0.00614251	851	2	ALP	.	intergenic, variant
rs7924036	10	65191645	T	G	1	0.0698392	0.0226092	260708	1	SHBG	JMJD1C, PRELID1P3	intron, variant, downstream, gene
rs147878798	7	72854292	C	T	1	-0.0166159	0.00633189	243797	2	TRIG	BAZ1B, FZD9	downstream, gene, variant
rs7004796	8	42450170	T	G	1	0.0259135	0.00890908	2217989	3	HBA1C	.	intergenic, variant
rs9821675	3	49902544	G	A	1	0.0220196	0.00783081	6252	1	BMI	CAMKV, RN7SL217P	intron, variant, NMD, transcript, upstream, gene, non, coding
rs116243766	4	9862208	T	C	1	-0.0175325	0.00665282	192166	11	URT	SLC2A9	intron, variant, non, coding, transcript
rs7247198	19	10590508	G	C	1	0.0183862	0.00702664	114418	1	IGF1	.	intergenic, variant
rs13002436	2	21488596	A	T	1	-0.0165897	0.00646061	42005	3	APOB	AC067959.1	intron, variant, non, coding, transcript, downstream, gene
rs16856115	2	169752190	G	A	1	-0.0163621	0.00651047	15840	6	HBA1C	SPC25	intron, variant, non, coding, transcript
rs6539288	12	107297862	A	T	1	-0.0198296	0.00754644	466	1	PHOS	EEF1B2P4	upstream, gene, variant
rs142734550	16	1940069	C	T	1	-0.0159408	0.00643542	2402906	4	IGF1	XX, DJ76P10, A.2, RN7SL367P	intron, variant, non, coding, transcript, downstream, gene
rs2105610	11	116535126	T	C	1	-0.0180673	0.00733365	554334	11	TRIG	.	intergenic, variant
rs116539016	12	102513153	A	G	1	0.0170795	0.0069085	332817	2	IGF1	NUP37, PARPBP	upstream, gene, variant, intron, non, coding, transcript, 5, prime, UTR
rs148084752	8	9300168	T	C	1	0.0171344	0.00702264	79391	4	ALP	.	intergenic, variant
rs7208422	17	76130575	A	T	1	-0.0171902	0.00720591	2339576	6	HBA1C	TMC8, TMC6	missense, variant, upstream, gene, downstream
rs350109	5	68499499	T	G	1	0.0162253	0.00679862	3838912	2	AST	CENPH	intron, variant, upstream, gene, downstream
rs73062454	12	21144925	T	C	1	0.0184131	0.007668	149604	15	TBIL	LST3, SLCO1B3, SLCO1B7	intron, variant
rs573455	11	117267884	G	A	1	-0.016087	0.00693774	353700	6	HDL	CEP164	missense, variant, non, coding, transcript, exon
rs863365	1	158551329	T	C	1	-0.0316119	0.0128144	291	1	HBA1C	OR10X1	upstream, gene, variant
rs1173743	5	32775047	T	G	1	0.0193516	0.00832746	60258	1	SBP	NPR3	intron, variant, non, coding, transcript
rs9364558	6	160929944	G	C	1	-0.0207539	0.0086681	448	1	SHBG	LPAL2	intron, variant, non, coding, transcript
rs487624	6	25879539	C	A	1	0.0214712	0.00934838	40086	3	URT	SLC17A3, HIST1H2APS2	intron, variant, downstream, gene
rs143001479	6	24484551	G	A	1	0.0158415	0.00717426	235636	10	ALP	GPLD1	intron, variant, non, coding, transcript
rs61863103	10	61460254	A	G	1	-0.016202	0.00743677	1173336	2	URT	SLC16A9	intron, variant, non, coding, transcript
rs6083824	20	25363057	A	G	1	0.032484	0.013645	85103	1	ALP	ABHD12	intron, variant, NMD, transcript
rs112212287	3	45919528	G	A	1	-0.0189617	0.00845892	2	1	AST	LZTFL1	intron, variant, NMD, transcript, non, coding
rs367273	8	81338686	C	A	1	-0.0193636	0.00892051	8822	3	SHBG	.	intergenic, variant
rs543746207	11	14133656	A	G	1	0.0186962	0.00872935	663133	6	VITD	SPON1	intron, variant, non, coding, transcript
rs7769712	6	132193395	A	C	1	-0.0150302	0.00714257	933	4	PHOS	ENPP1	intron, variant, non, coding, transcript, NMD
rs1658469	10	60292402	G	A	1	0.0174592	0.00805207	5484	1	URT	BICC1	intron, variant
rs312030	2	21462743	C	T	1	0.0151739	0.00727883	231504	4	APOB	AC067959.1	intron, variant, non, coding, transcript
rs138361368	1	109825558	C	A	1	0.0169031	0.00797128	129930	3	LDL	PSRC1	intron, variant, 5, prime, UTR, non, coding, transcript, upstream, gene
rs74614990	16	56889820	T	A	1	0.015693	0.00768023	20673	7	HDL	MIR138, 2	upstream, gene, variant
rs11638256	15	58772807	T	C	1	-0.0150388	0.00736312	79073	10	APOA	LIPC, ALDH1A2, RP11, 355N15.1	intron, variant, non, coding, transcript
rs7225870	17	60394911	A	G	1	-0.0144412	0.00718318	963488	4	IGF1	RP11, 51L5.1	upstream, gene, variant
rs140386498	1	150972959	A	T	1	-0.0145253	0.007253	3673110	2	SHBG	FAM63A, ANXA9	missense, variant, downstream, gene, intron, non, coding, transcript, upstream
rs118004283	14	73196011	G	T	1	-0.0145117	0.00735644	174593	3	CRP	DPF3	intron, variant, NMD, transcript, non, coding
rs7914158	10	104422321	C	T	1	-0.0153263	0.00774	2309916	3	ALP	TRIM8	downstream, gene, variant
rs79318089	22	24548597	A	G	1	-0.0152806	0.00774714	426021	11	GGT	CABIN1	intron, variant, upstream, gene
rs4238686	16	88788934	G	A	1	-0.0170356	0.00879657	1771791	2	HBA1C	PIEZO1, RP5, 1142A6.9	intron, variant, upstream, gene, downstream, non, coding, transcript, exon
rs9265332	6	31294094	C	T	1	0.0149134	0.00772342	3362921	2	HDL	.	intergenic, variant
rs139257330	2	234643807	A	C	1	-0.0196172	0.00959849	672722	15	TBIL	UGT1A6, UGT1A10, UGT1A9, UGT1A4, UGT1A5, UGT1A7, UGT1A8, UGT1A3, AC114812.9	intron, variant, NMD, transcript, non, coding, upstream, gene
rs509345	1	150276022	A	G	1	-0.0147553	0.00766395	4776444	2	GGT	MRPS21	intron, variant
rs2010397	1	22141983	T	C	1	-0.0146382	0.00764741	173104	11	ALP	LDLRAD2	intron, variant
rs36100458	7	73099588	C	T	1	0.0145452	0.00772264	41785	3	TRIG	WBSCR22, DNAJC30	intron, variant, upstream, gene, NMD, transcript, non, coding
rs3750803	10	61469136	C	T	1	-0.0149363	0.00800874	1182218	3	URT	SLC16A9	intron, variant, non, coding, transcript
rs71441083	2	27747949	G	A	1	-0.0199974	0.0102686	306885	4	TRIG	GCKR	downstream, gene, variant
rs6672331	1	65975847	G	C	1	-0.014741	0.00795633	367293	4	CRP	LEPR	intron, variant
rs7252574	19	8441779	T	C	1	0.0143193	0.00796801	4278	2	HDL	ANGPTL4, RAB11B, AS1	downstream, gene, variant, intron, non, coding, transcript
rs1971508	6	26085807	C	A	1	0.0175019	0.00967486	166182	4	URT	HFE	upstream, gene, variant
rs117696796	17	59442727	C	T	1	-0.0135638	0.00763987	166001	3	CREA	BCAS3, RP11, 332H18.5	intron, variant, non, coding, transcript
rs76138007	17	7880565	C	A	1	-0.0145253	0.00831891	398459	12	SHBG	.	intergenic, variant
rs34799319	3	136586618	G	A	1	-0.0235724	0.0136307	307592	3	TBIL	NCK1	intron, variant, non, coding, transcript
rs58844945	8	9201373	A	C	1	0.0145617	0.0085078	19404	5	ALP	RP11, 115J16.1	intron, variant, non, coding, transcript
rs75779601	22	24603473	T	C	1	0.0141888	0.00838441	613703	7	GGT	.	intergenic, variant
rs117690264	20	46470931	C	T	1	-0.0133561	0.0078843	3428963	2	APOA	.	intergenic, variant
rs3916324	3	172256277	T	C	1	-0.0143103	0.00850065	29538	3	IGF1	.	intergenic, variant
rs117733303	6	160922870	A	G	1	-0.0183242	0.0106279	353055	2	APOB	LPAL2	intron, variant, non, coding, transcript
rs10849794	12	121251782	C	A	1	0.0145201	0.00898048	58555	5	CRP	SPPL3	intron, variant, upstream, gene
rs12064734	1	113226750	T	A	1	-0.0131894	0.00813722	29889	2	CREA	MOV10	intron, variant, non, coding, transcript
rs117649654	16	88916780	G	A	1	-0.0131142	0.00814767	1899637	3	HBA1C	GALNS	intron, variant, upstream, gene, non, coding, transcript, NMD, downstream
rs79112951	11	116621972	C	T	1	-0.0144307	0.00900893	26309	12	TRIG	BUD13	intron, variant, NMD, transcript
rs115776071	19	49987053	C	T	1	0.0147544	0.00923166	784037	6	TPROT	FLT3LG, RPL13A, CTD, 3148I10.15, 3148I10.9	intron, variant, downstream, gene, upstream, non, coding, transcript, NMD
rs4753126	11	93862020	T	C	1	0.0141997	0.00891689	6366	1	ALT	PANX1	upstream, gene, variant
rs2814949	6	34656722	A	G	1	0.0176464	0.0107605	293	1	HDL	C6orf106, RP3, 391O22.1, snoU13, RN7SL200P	intron, variant, downstream, gene, upstream
rs151192254	1	21983600	G	C	1	0.0129705	0.00823162	14721	4	PHOS	RAP1GAP	intron, variant, upstream, gene, non, coding, transcript, NMD
rs3794738	17	76119293	C	T	1	0.0142686	0.00933635	2406767	4	HBA1C	TMC6	intron, variant, non, coding, transcript, downstream, gene, upstream
rs9362415	6	87968565	A	G	1	0.0158759	0.0101788	2633	1	IGF1	ZNF292	missense, variant, downstream, gene, intron
rs139848079	10	61128500	C	T	1	0.0125947	0.00828126	841582	4	URT	.	intergenic, variant
rs41271951	1	150737220	A	G	1	-0.0123391	0.00813493	4469055	2	CAL	CTSS	missense, variant, upstream, gene
rs7750288	6	160400147	A	G	1	-0.0127369	0.00850065	509165	3	CHO	IGF2R	intron, variant
rs189716380	22	24941978	G	A	1	0.0121757	0.00825978	32640	8	GGT	GUCD1	intron, variant, NMD, transcript, downstream, gene, non, coding, upstream
rs551243	11	66074483	G	C	1	-0.0122089	0.00831812	1731210	4	URT	.	intergenic, variant
rs28360447	12	121600238	G	A	1	0.0122392	0.00836505	200157	5	GGT	P2RX7	intron, variant, NMD, transcript, missense, non, coding, exon, downstream, gene, 3, prime, UTR, synonymous, 5
rs76898938	2	27539201	G	A	1	-0.0186028	0.0123063	98137	3	TRIG	MPV17	intron, variant, NMD, transcript, upstream, gene, downstream, non, coding
rs2238689	19	46178661	T	C	1	0.0123826	0.00854994	3024355	2	URA	GIPR, MIR642A	intron, variant, downstream, gene, NMD, transcript, non, coding, exon, upstream
rs183291851	10	118774349	G	T	1	-0.0119741	0.0082855	3980492	2	HBA1C	KIAA1598	intron, variant
rs560402318	6	23734002	G	C	1	-0.0147163	0.0100084	514913	8	ALP	.	intergenic, variant
rs34391931	15	62357618	A	G	1	-0.0130981	0.00905208	21189	2	IGF1	VPS13C, C2CD4A, RP11, 643M14.1	upstream, gene, variant, downstream
rs198809	6	26128766	A	G	1	0.0128914	0.00903812	751100	3	HBA1C	HIST1H2AC, HIST1H2BC	intron, variant, NMD, transcript, upstream, gene, downstream
rs13013484	2	27988821	A	G	1	0.0132129	0.0092529	185506	2	GGT	.	intergenic, variant
rs4796412	17	7280269	G	A	1	0.0125227	0.00873465	598259	9	SHBG	TNK1	upstream, gene, variant
rs13013419	2	148575688	C	T	1	0.0155618	0.0106767	4966	1	CREA	.	intergenic, variant
rs2255540	16	83988599	G	A	1	0.0118335	0.00836839	2605720	2	SHBG	OSGIN1, RP11, 505K9.4	intron, variant, downstream, gene, upstream
rs3760238	17	62050528	T	C	1	0.0116471	0.00828676	692129	5	IGF1	SCN4A, CTC, 264K15.6	upstream, gene, variant, non, coding, transcript, exon
rs5757783	22	40127293	C	T	1	0.0117634	0.00839938	4277891	5	AST	.	intergenic, variant
rs147996165	19	19815641	C	T	1	0.0121814	0.00887699	437293	3	TRIG	CTC, 412M14.5	upstream, gene, variant
rs141447754	12	123730764	C	T	1	-0.0123706	0.00908808	1549202	3	HDL	C12orf65, MPHOSPH9	intron, variant, non, coding, transcript, upstream, gene
rs35723421	22	25113739	A	G	1	0.0115809	0.00852096	103437	12	GGT	PIWIL3	downstream, gene, variant
rs112317699	4	146825881	T	C	1	-0.0114521	0.00847926	15751	3	GGT	ZNF827	intron, variant
rs141154205	16	85563310	G	T	1	0.0113092	0.00839031	1453833	5	HBA1C	.	intergenic, variant
rs4917896	10	102039463	C	T	1	-0.017721	0.0127568	418143	1	AST	BLOC1S2	downstream, gene, variant, intron
rs1131535	3	172224075	C	T	1	0.0175167	0.0126628	31423	1	IGF1	TNFSF10	3, prime, UTR, variant, downstream, gene
rs10865035	2	100835734	G	A	1	-0.0152705	0.0112086	6237	1	TPROT	LINC01104	intron, variant, non, coding, transcript
rs116630059	1	16558975	C	T	1	0.0115331	0.00882654	80920	3	GGT	RSG1, C1orf134, ANO7P1	intron, variant, upstream, gene
rs3803906	19	45715976	A	G	1	-0.0109982	0.0084574	297657	2	ALT	EXOC3L2, MARK4, AC006126.3	3, prime, UTR, variant, intron
rs339985	15	60918103	A	T	1	-0.0110821	0.00887283	36603	2	GGT	RORA, RP11, 219B17.1	intron, variant, NMD, transcript, non, coding
rs2058852	19	38164602	C	G	1	0.0109365	0.00873815	4856755	3	CREA	ZNF781, ZFP30	intron, variant, downstream, gene, non, coding, transcript
rs12332040	4	146829530	T	C	1	0.0108979	0.00880003	19400	4	GGT	ZNF827	intron, variant
rs6072339	20	39955307	T	C	1	-0.0146895	0.0115661	5076	1	APOB	RP3, 450M14.1	upstream, gene, variant
rs35074988	20	35549536	C	G	1	-0.0102948	0.0083881	1820904	2	CREA	SAMHD1	intron, variant
rs1420409	12	98186865	G	A	1	-0.0104804	0.00853152	4659105	4	IGF1	.	intergenic, variant
rs3764613	19	46896217	G	A	1	0.0103576	0.00850801	1477898	8	CRP	PPP5C, AC007193.8	downstream, gene, variant, 3, prime, UTR, NMD, transcript, upstream
rs555040037	9	108929750	G	A	1	-0.0104351	0.00856993	1294102	2	CHO	.	intergenic, variant
rs4233334	1	89147213	T	A	1	0.0136951	0.0111333	251023	1	GGT	PKN2, RP11, 76N22.2	upstream, gene, variant, intron, non, coding, transcript
rs4888087	16	80490858	T	G	1	-0.013575	0.0112772	22505	1	GGT	RP11, 525K10.3	intron, variant, non, coding, transcript
rs2802953	1	235014644	C	T	1	0.0102781	0.00859403	164781	2	CHO	.	intergenic, variant
rs115766690	5	33203559	C	G	1	-0.0110332	0.00919114	488770	2	SBP	CTD, 2066L21.3	intron, variant, non, coding, transcript
rs4879666	9	33125279	A	G	1	0.0130832	0.0107594	10659	1	AST	B4GALT1	intron, variant
rs12624645	20	44450217	G	C	1	0.0128784	0.0106682	1408249	2	HDL	UBE2C, TNNC2	downstream, gene, variant
rs1057355	17	1657899	G	T	1	-0.00988586	0.00840731	2477960	2	CAL	SERPINF2	3, prime, UTR, variant, downstream, gene
rs72649167	4	74539183	G	A	1	0.0133794	0.011207	4483	1	ALB	.	intergenic, variant
rs118027010	8	121857366	C	T	1	-0.00992792	0.00859258	4494262	3	HDL	.	intergenic, variant
rs76332675	17	76141409	G	A	1	-0.0104351	0.00932523	2384651	5	HBA1C	TMC8, C17orf99	downstream, gene, variant, upstream
rs35759	12	102953895	A	C	1	-0.00970412	0.00868678	107925	3	IGF1	.	intergenic, variant
rs113905406	1	110004306	T	C	1	0.0132492	0.0116318	6361	3	APOB	SYPL2	upstream, gene, variant
rs117154497	10	100992702	T	C	1	-0.00988233	0.00888015	825201	4	AST	HPSE2	intron, variant
rs138920770	19	11013474	C	T	1	0.00960904	0.00865443	204569	4	APOB	CARM1	intron, variant, NMD, transcript
rs6545036	2	48589166	A	C	1	-0.00992507	0.00896694	4749757	2	HBA1C	FOXN2	intron, variant
rs204907	19	45461996	A	G	1	0.0132248	0.0119237	265914	14	LDL	CLPTM1, CTB, 129P6.11	intron, variant, non, coding, transcript, upstream, gene
rs2220391	3	168910159	A	G	1	-0.00921197	0.00856045	3316580	4	IGF1	MECOM	intron, variant, non, coding, transcript
rs2183193	14	103606276	T	C	1	-0.0101221	0.00940735	646708	3	GGT	TNFAIP2, RP11, 736N17.4	downstream, gene, variant, non, coding, transcript, exon
rs115872346	9	107482330	T	A	1	-0.0102531	0.00947418	95395	6	APOA	OR13D3P	upstream, gene, variant
rs6926383	6	25903235	C	T	1	-0.0114923	0.0106092	59413	1	HBA1C	.	intergenic, variant
rs3795128	20	39774163	T	C	1	-0.0113423	0.0104496	629632	3	CHO	PLCG1	intron, variant, non, coding, transcript
rs11771654	7	28904123	A	G	1	0.00917289	0.00860035	2863625	2	GGT	.	intergenic, variant
rs4948487	10	63669865	C	A	1	0.00909184	0.00858055	1782488	3	SHBG	ARID5B	intron, variant
rs238682	16	1879097	A	G	1	0.0114813	0.0108429	2477259	2	IGF1	MEIOB, FAHD1, HAGH	downstream, gene, variant, intron, upstream
rs73608003	8	19867064	G	C	1	-0.00954633	0.00901138	105545	7	HDL	.	intergenic, variant
rs7205989	16	88778615	A	G	1	-0.009783	0.0093179	1761472	4	HBA1C	PIEZO1, CTU2, MIR4722	downstream, gene, variant, intron, upstream, NMD, transcript, non, coding, missense
rs116856166	9	136388479	G	A	1	-0.0091023	0.0087836	191916	10	ALP	TMEM8C	intron, variant, non, coding, transcript
rs10799708	1	22046558	C	A	1	-0.00976377	0.00955358	242102	3	PHOS	USP48	intron, variant, non, coding, transcript, downstream, gene
rs340849	1	214118090	A	C	1	0.00885103	0.00859028	29970	2	HBA1C	PROX1, AS1	intron, variant, non, coding, transcript
rs373024776	9	136335097	A	G	1	-0.00903771	0.00879903	174215	11	ALP	CACFD1, SLC2A6	3, prime, UTR, variant, downstream, gene
rs117626295	14	103562071	A	G	1	-0.00971574	0.00952646	613686	4	GGT	EXOC3L4, RP11, 736N17.8	upstream, gene, variant, intron, non, coding, transcript
rs117236388	6	157444698	G	A	1	-0.00870496	0.00858391	3464614	5	CHO	ARID1B, RP1, 137K2.2	intron, variant, upstream, gene, non, coding, transcript
rs9919993	15	39273133	T	G	1	0.00853347	0.00846513	2084461	3	CREA	RP11, 624L4.1	intron, variant, non, coding, transcript
rs61907566	11	116748905	C	G	1	0.0112241	0.0117181	165279	2	APOA	SIK3	intron, variant, NMD, transcript, upstream, gene
rs3814995	19	36342212	C	T	1	0.00840825	0.00858418	2942250	5	CREA	NPHS1, KIRREL2	missense, variant, upstream, gene, downstream
rs2121207	15	102114106	G	T	1	-0.00831898	0.00852794	3786543	2	URT	.	intergenic, variant
rs72640317	8	41629885	G	A	1	0.00911216	0.00930905	814726	5	HBA1C	ANK1	intron, variant
rs35826789	11	66867155	T	A	1	-0.0114739	0.0115688	263	1	IGF1	.	intergenic, variant
rs114187816	1	158589366	G	A	1	0.00858402	0.00886187	38328	3	HBA1C	SPTA1	intron, variant, downstream, gene, non, coding, transcript, upstream
rs10822143	10	64887856	T	C	1	-0.0146037	0.0147145	7933	1	TBIL	RP11, 144G16.1	upstream, gene, variant
rs111279112	10	64865230	C	T	0	0.00926747	0.0097064	587123	2	SHBG	RNU6, 543P	upstream, gene, variant
rs61734601	11	67184725	G	A	0	-0.0110454	0.0115474	317307	2	IGF1	CARNS1, PPP1CA	intron, variant, upstream, gene, downstream, non, coding, transcript, exon
rs140339	22	24919016	C	T	0	0.0091432	0.00982375	55602	10	GGT	UPB1, AP000355.2	intron, variant, NMD, transcript, downstream, gene, non, coding
rs12920353	16	80405343	C	T	0	-0.0085527	0.00917749	108020	2	GGT	RP11, 525K10.3	intron, variant, non, coding, transcript
rs12282721	11	117151412	G	A	0	-0.00818707	0.00889998	401313	3	APOA	RNF214, BACE1	intron, variant, downstream, gene, upstream
rs4814659	20	17780026	C	G	0	-0.00773848	0.00846153	60926	2	APOB	.	intergenic, variant
rs7665587	4	99796777	T	C	0	-0.00784158	0.00859179	3132251	2	AST	EIF4E	3, prime, UTR, variant
rs11264303	1	155030557	C	A	0	0.00776443	0.00852222	175718	2	URT	ADAM15	synonymous, variant, upstream, gene, non, coding, transcript, exon, downstream, NMD
rs113420625	1	216190649	G	A	0	0.00767379	0.00843786	2042589	3	HBA1C	USH2A	intron, variant
rs8080690	17	7409499	T	G	0	-0.00983151	0.0108278	469029	10	SHBG	POLR2A	intron, variant, upstream, gene, downstream
rs9684176	4	9716386	G	T	0	0.00879668	0.00970581	661812	12	URT	ALG1L3P	upstream, gene, variant
rs141130055	1	159794551	A	G	0	0.00761933	0.00844088	228471	8	CRP	SLAMF8	upstream, gene, variant
rs78110496	11	15047402	A	G	0	0.0157982	0.01754	228890	5	VITD	CALCB	intron, variant
rs72974599	11	94007097	G	A	0	0.00824283	0.00929135	138711	2	ALT	RP11, 680H20.2	intron, variant, non, coding, transcript
rs79467716	2	169404334	G	A	0	0.00728862	0.00837993	363696	7	HBA1C	CERS6	intron, variant
rs77281709	1	176501831	C	T	0	-0.0073765	0.00852559	459425	3	IGF1	PAPPA2	intron, variant, upstream, gene
rs149700491	1	109473806	G	A	0	0.00770054	0.00888242	689555	5	APOB	GPSM2, CLCC1, AKNAD1	downstream, gene, variant, 3, prime, UTR, intron, non, coding, transcript
rs79766217	2	163354009	G	A	0	-0.00712469	0.00826558	2243482	2	TRIG	KCNH7, RNA5SP109	intron, variant, downstream, gene
rs17656498	18	47128176	T	C	0	-0.00738598	0.00863353	202923	5	APOA	.	intergenic, variant
rs1541988	6	25950804	A	C	0	-0.00947414	0.011029	1083193	3	HBA1C	.	intergenic, variant
rs112964088	12	116422269	T	A	0	-0.00701879	0.00832918	4243964	2	TBIL	MED13L	intron, variant, upstream, gene
rs16978740	22	24983264	C	T	0	0.00720588	0.0086347	42540	13	GGT	GGT1, FAM211B, SNRPD3	intron, variant, NMD, transcript, non, coding, downstream, gene
rs13405698	2	44101711	T	C	0	0.00689702	0.00834697	14386	2	CHO	ABCG8	intron, variant
rs1871900	8	22481449	A	G	0	0.0068163	0.00828696	1240389	2	CREA	BIN3, CCAR2	synonymous, variant, downstream, gene, non, coding, transcript, exon
rs6531214	2	20353223	A	G	0	-0.00674251	0.00825812	871802	2	APOA	AC098828.3	downstream, gene, variant
rs113299853	16	1916442	C	T	0	0.00710347	0.00871258	2439914	5	IGF1	MEIOB	intron, variant, NMD, transcript
rs4888524	16	76618621	C	G	0	0.00661027	0.00813084	4639799	2	APOB	RP11, 58C22.1	intron, variant
rs80082308	16	56796904	A	G	0	-0.0072683	0.00897951	218790	13	HDL	NUP93	intron, variant
rs186262518	22	24886442	G	A	0	0.00668735	0.00832343	330734	9	GGT	UPB1, ADORA2A, AS1	upstream, gene, variant, intron, non, coding, transcript
rs7914134	10	71056198	A	T	0	0.00678644	0.00845413	1370	9	HBA1C	HK1, RP11, 227H15.7	intron, variant, downstream, gene, non, coding, transcript
rs192665233	17	37986075	C	A	0	-0.00657729	0.00824713	3792339	2	APOA	IKZF3	intron, variant, NMD, transcript
rs10406327	19	33890838	C	G	0	0.00652134	0.00816545	1672793	2	CAL	PEPD	intron, variant, downstream, gene, upstream
rs117077150	20	44447447	C	T	0	0.00690398	0.00866875	1405479	3	HDL	UBE2C, TNNC2	downstream, gene, variant
rs3813027	17	76123463	C	G	0	-0.00689323	0.00874799	2402597	7	HBA1C	TMC6, TMC8	intron, variant, upstream, gene, NMD, transcript, non, coding, downstream
rs4430500	11	10254371	T	C	0	0.00665585	0.00843055	503842	2	SBP	SBF2	intron, variant
rs601325	2	20982391	T	C	0	-0.00641981	0.00816345	242634	3	APOA	C2orf43	intron, variant
rs7980765	12	108980740	G	A	0	0.00628532	0.00805656	1683344	2	PHOS	TMEM119	downstream, gene, variant
rs72647036	4	74318500	A	G	0	0.00868973	0.0109625	9124	2	ALB	AFP	intron, variant, upstream, gene, non, coding, transcript
rs4709431	6	160853746	A	C	0	-0.00855672	0.0108534	150587	1	CHO	SLC22A3	intron, variant
rs117688345	6	160683690	G	A	0	-0.00625679	0.00810522	2285534	2	GGT	SLC22A2	intron, variant, upstream, gene
rs149730559	5	41032341	T	C	0	-0.0062787	0.00815992	122442	2	URA	MROH2B	intron, variant, non, coding, transcript
rs1320366	2	524173	C	G	0	0.00599267	0.00785096	2422782	2	BMI	.	intergenic, variant
rs113450947	4	77365447	A	G	0	0.00628862	0.00824588	8914	2	CREA	SHROOM3	intron, variant, non, coding, transcript
rs3848715	20	44564682	A	G	0	-0.0075916	0.00985795	6987	5	HDL	PCIF1	intron, variant
rs4878526	9	33164677	A	G	0	0.00809118	0.0104702	50057	1	AST	B4GALT1, RP11, 326F20.5	intron, variant, upstream, gene
rs117698737	11	14727284	A	G	0	-0.0100326	0.0130958	165875	6	VITD	PDE3B	intron, variant, downstream, gene, non, coding, transcript
rs146191451	16	80506286	C	T	0	-0.00673635	0.00887006	15113	3	GGT	RP11, 525K10.3	intron, variant, non, coding, transcript
rs143848265	4	72748387	T	C	0	-0.00595859	0.00793905	4625974	3	CREA	.	intergenic, variant
rs72876067	1	21963231	T	C	0	0.00658848	0.00881277	5648	12	ALP	RAP1GAP	intron, variant, non, coding, transcript, NMD
rs147205044	8	126575881	G	T	0	0.00595061	0.00798542	97842	2	APOB	.	intergenic, variant
rs114966185	6	24405067	T	C	0	0.00630907	0.00863307	23521	11	ALP	MRS2	intron, variant, non, coding, transcript
rs6917995	6	26327814	T	C	0	-0.00648253	0.00879679	706183	5	HBA1C	.	intergenic, variant
rs111885910	6	132123745	A	C	0	0.00583356	0.00794154	68717	5	PHOS	.	intergenic, variant
rs72643865	8	41238247	G	A	0	0.00632703	0.00857684	1006066	6	HBA1C	.	intergenic, variant
rs114014640	6	34370604	T	G	0	0.00602933	0.00824372	286411	3	HDL	RPS10, NUDT3	intron, variant
rs16918645	10	65346300	A	G	0	-0.00624182	0.00850304	450511	2	TBIL	REEP3	intron, variant
rs11090305	22	24407483	T	C	0	0.00614628	0.00847129	533241	13	GGT	CABIN1, AP000351.13	upstream, gene, variant
rs2251125	19	36044502	A	G	0	0.00575187	0.00794193	480871	2	ALB	ATP4A	intron, variant, non, coding, transcript, downstream, gene
rs3736922	10	104850632	G	A	0	-0.00578851	0.00801714	625511	4	ALP	NT5C2, CNNM2	intron, variant, non, coding, transcript, downstream, gene
rs72850098	17	62936677	A	G	0	0.00556578	0.0077205	3659951	4	CREA	SLC16A6P1, RP11, 927P21.6, 583F2.2, 927P21.11	upstream, gene, variant
rs148162540	1	110154510	A	G	0	0.00604295	0.00835846	326097	6	APOB	GNAT2, AMPD2	intron, variant, upstream, gene
rs74919716	2	28190133	G	A	0	-0.00583296	0.00810688	79495	7	TRIG	BRE, MRPL33	intron, variant, NMD, transcript, non, coding
rs11581793	1	150292561	C	T	0	0.00578581	0.0080765	4913714	3	GGT	PRPF3	upstream, gene, variant
rs1035478	19	33316323	C	T	0	0.00697866	0.00964281	83639	5	CREA	TDRD12, CTD, 2085J24.5	downstream, gene, variant, intron, NMD, transcript, upstream
rs7205421	16	56879571	C	G	0	-0.00716197	0.0100503	30922	6	HDL	NUP93	downstream, gene, variant
rs1990990	19	33361794	C	T	0	-0.00749104	0.0105706	9945	1	CREA	SLC7A9	upstream, gene, variant
rs117595077	11	14894946	G	A	0	-0.00545653	0.00783926	499980	8	VITD	PDE3B, CYP2R1	downstream, gene, variant
rs9895279	17	5984997	C	G	0	0.00515445	0.00750816	1849138	2	ALB	WSCD1	intron, variant, NMD, transcript, downstream, gene, upstream
rs12860172	13	114519894	T	C	0	-0.00527304	0.00768243	2756611	2	HBA1C	GAS6, TMEM255B, AS1	downstream, gene, variant, intron, non, coding, transcript
rs72869727	11	14681568	G	T	0	0.0056566	0.00834416	136944	7	VITD	PDE3B	intron, variant, non, coding, transcript
rs12407219	1	155549562	A	G	0	0.00537225	0.00786879	343287	2	URA	.	intergenic, variant
rs13317803	3	172177764	T	C	0	-0.00833693	0.0120081	7419	5	IGF1	.	intergenic, variant
rs2699616	2	100709352	C	T	0	-0.00749715	0.0108053	6163	2	TPROT	AFF3	intron, variant
rs12447016	16	80451142	T	C	0	0.00661116	0.00970017	40031	3	GGT	RP11, 525K10.3	intron, variant, non, coding, transcript
rs2971860	2	234383797	C	A	0	-0.00540538	0.00801482	2811	2	CAL	USP40, DGKD	downstream, gene, variant
rs17705646	17	37262117	C	T	0	-0.0050851	0.0075708	619404	2	CREA	PLXDC1, CTD, 2206N4.4	synonymous, variant, non, coding, transcript, exon, downstream, gene, NMD, intron, 3, prime, UTR
rs4921679	8	19710423	G	C	0	-0.00560551	0.00840107	210287	8	TRIG	INTS10	downstream, gene, variant
rs72722621	8	126399416	T	C	0	0.00511503	0.00764286	78623	2	LDL	.	intergenic, variant
rs91755	19	10473570	G	T	0	-0.00565011	0.00851872	2520	2	IGF1	TYK2	intron, variant, upstream, gene
rs74737417	8	19974789	C	G	0	0.00586978	0.00892035	36194	6	TRIG	RPL30P9, AC100802.3	upstream, gene, variant, intron, non, coding, transcript
rs10998673	10	71007767	G	C	0	-0.00530178	0.0081188	87876	12	HBA1C	HKDC1	intron, variant, non, coding, transcript
rs58759531	12	120731050	C	T	0	-0.00541594	0.00823489	725231	4	GGT	RNU4, 1, 2	upstream, gene, variant
rs77398593	1	222191706	C	T	0	0.00481794	0.0074529	1140646	2	IGF1	.	intergenic, variant
rs12775701	10	5145178	A	G	0	0.00606064	0.0100785	141876	2	IGF1	AKR1C3	intron, variant, downstream, gene, upstream
rs11964601	6	87572994	T	C	0	-0.00482496	0.00748379	392938	2	IGF1	.	intergenic, variant
rs2292137	12	123339358	C	G	0	0.00508432	0.00791988	1919796	6	HDL	HIP1R	intron, variant, non, coding, transcript, upstream, gene
rs111208266	16	1786305	G	A	0	0.00567385	0.00878809	2499035	5	IGF1	MAPK8IP3, MIR3177	intron, variant, non, coding, transcript, downstream, gene
rs75488049	4	10049995	G	A	0	-0.00530103	0.00829118	130028	13	URT	SLC2A9	intron, variant
rs16970642	17	75894388	A	T	0	-0.00484057	0.00761783	2575763	8	HBA1C	.	intergenic, variant
rs116361102	2	27732845	G	A	0	-0.00781517	0.0120247	536783	3	TRIG	GCKR	intron, variant, downstream, gene
rs2102928	17	38253228	C	T	0	-0.00463154	0.00740766	3670531	4	HDL	NR1D1, THRA	intron, variant, downstream, gene
rs139539281	4	10081124	G	A	0	0.005417	0.00865525	411082	14	URT	WDR1, MIR3138	intron, variant, non, coding, transcript, downstream, gene, upstream
rs2495489	1	55498864	A	T	0	-0.00454895	0.00735897	26649	3	LDL	.	intergenic, variant
rs7916868	10	64988931	T	A	0	0.0195946	0.0306035	220666	1	ALP	JMJD1C	intron, variant, non, coding, transcript
rs3803452	15	57579746	T	C	0	-0.0045346	0.00733839	1151327	3	CHO	TCF12	3, prime, UTR, variant, downstream, gene, intron
rs116173943	1	158512316	T	C	0	0.00484256	0.00784459	38722	2	HBA1C	OR6Y1	downstream, gene, variant
rs12454712	18	60845884	T	C	0	0.00445755	0.00727027	4694835	2	GGT	BCL2	intron, variant
rs881273	19	33182320	G	A	0	0.0056137	0.00904028	217642	5	CREA	NUDT19, CTD, 2538C1.2	upstream, gene, variant, non, coding, transcript, exon
rs4599354	4	145013489	A	T	0	0.00500843	0.00822609	322336	4	HBA1C	GYPB, RP11, 673E1.4	intron, variant, non, coding, transcript
rs4298983	12	121385479	T	C	0	0.00453944	0.00746934	14602	7	GGT	.	intergenic, variant
rs62566032	9	107549827	G	A	0	-0.00531117	0.00874827	27898	7	APOA	ABCA1	intron, variant
rs11256255	10	9583878	C	T	0	-0.00451317	0.00745144	270559	4	CAL	.	intergenic, variant
rs9997101	4	144699045	T	C	0	-0.00495791	0.00820598	7892	3	HBA1C	RP13, 578N3.3	intron, variant, non, coding, transcript
rs114174003	2	28396355	C	T	0	-0.0044924	0.00746167	405980	8	TRIG	BRE	intron, variant
rs78357146	17	64305051	A	G	0	0.00655798	0.0107002	95536	2	SHBG	PRKCA	intron, variant, NMD, transcript, non, coding, downstream, gene
rs610249	1	109692641	A	G	0	0.00442059	0.00742412	86430	5	LDL	KIAA1324	intron, variant, non, coding, transcript, NMD
rs191869082	4	10340135	G	A	0	0.00504332	0.00845139	186912	14	URT	.	intergenic, variant
rs2243029	5	76120381	T	C	0	-0.00408192	0.00697657	3781970	2	ALB	F2RL1	intron, variant
rs76102919	12	121464894	T	C	0	-0.00422187	0.00725142	271667	8	CRP	OASL	intron, variant
rs7001548	8	9357578	G	A	0	-0.00459571	0.00789785	136801	6	ALP	.	intergenic, variant
rs1541596	19	10987013	G	A	0	-0.00413699	0.007178	510923	3	IGF1	CARM1	intron, variant, NMD, transcript
rs2278490	16	56926793	C	T	0	0.00467344	0.00812866	50768	10	HDL	SLC12A3	intron, variant
rs591346	8	9818065	T	C	0	0.00536641	0.00951769	597288	2	ALP	.	intergenic, variant
rs786916	1	89290857	T	C	0	0.0055692	0.00963017	150815	1	GGT	PKN2, TCEB1P19	intron, variant, upstream, gene
rs6060565	20	34285442	C	T	0	0.00415062	0.00730254	4859089	4	CHO	NFS1, ROMO1	intron, variant, upstream, gene, NMD, transcript, non, coding
rs9469899	6	34793124	G	A	0	0.00543558	0.00950908	136109	1	APOA	UHRF1BP1, Y, RNA	intron, variant, downstream, gene
rs10844017	12	31961927	C	G	0	0.00383629	0.00683782	957248	2	IGF1	SNORA25	upstream, gene, variant
rs138371541	4	10128912	G	C	0	0.00467667	0.00829501	24311	14	URT	.	intergenic, variant
rs12942113	17	7085367	C	T	0	0.00397968	0.00711926	40729	8	ALP	ASGR1	upstream, gene, variant
rs73240431	17	7440766	C	T	0	-0.00430708	0.00769055	159899	13	SHBG	Y, RNA	upstream, gene, variant
rs150262789	19	46436564	C	T	0	0.00403875	0.00725202	2766452	4	URA	NOVA2	downstream, gene, variant
rs76372731	2	169747216	T	C	0	0.00387167	0.00697876	20814	8	HBA1C	SPC25	upstream, gene, variant, intron, non, coding, transcript
rs11265165	1	159283746	T	C	0	0.00451865	0.00815076	4767753	12	CRP	OR10J3	missense, variant
rs111297126	5	39877061	T	C	0	0.00381108	0.00690009	1032838	3	URA	.	intergenic, variant
rs116974927	8	19951598	G	C	0	0.0041335	0.00752007	30888	7	TRIG	AC100802.3	intron, variant, non, coding, transcript
rs6142444	20	34374421	T	C	0	0.00389593	0.00712746	4770110	4	CHO	PHF20	intron, variant, NMD, transcript, non, coding
rs62515108	8	81546628	G	A	0	-0.0038794	0.00716233	133248	2	SHBG	ZNF704	3, prime, UTR, variant, downstream, gene
rs3965793	2	234457900	A	T	0	-0.00386832	0.00714186	76914	2	CAL	USP40, RP11, 289A15.1	intron, variant, downstream, gene
rs11071319	15	57741261	A	G	0	-0.00366182	0.00678989	3773309	2	CREA	CGNL1	intron, variant
rs6907805	6	87856003	G	T	0	0.00482914	0.00894571	109929	1	IGF1	RP11, 393I2.4	downstream, gene, variant
rs3895736	3	48658467	C	A	0	-0.00350727	0.00666211	1102313	2	HBA1C	SLC26A6, TMEM89	downstream, gene, variant, splice, polypyrimidine, tract, region, intron
rs11723946	4	72980095	C	T	0	-0.00355716	0.00675525	260360	7	VITD	NPFFR2	intron, variant
rs1008723	17	38066267	T	G	0	0.00377112	0.0072347	3712147	2	HDL	GSDMB	intron, variant, non, coding, transcript, NMD, upstream, gene
rs182936472	1	155176480	C	A	0	0.0035852	0.00687435	29795	3	URA	MTX1, THBS3, RP11, 263K19.4, 263K19.6	upstream, gene, variant, intron, downstream, NMD, transcript, non, coding
rs138799960	6	23972500	C	A	0	-0.00456039	0.00867943	596251	12	ALP	RP1, 59B16.1	non, coding, transcript, exon, variant
rs77119960	4	9559726	A	G	0	-0.00376751	0.00724151	620297	13	URT	MIR548I2, RP11, 1396O13.1	upstream, gene, variant
rs3816031	19	33428166	G	T	0	0.00380385	0.00732623	120319	4	CREA	CEP89	intron, variant, NMD, transcript, downstream, gene
rs181862229	16	55938164	C	T	0	-0.00335367	0.00652896	1054769	9	APOA	CES5A	intron, variant, NMD, transcript, non, coding
rs9799404	4	144894260	T	C	0	0.003775	0.00736142	114281	5	HBA1C	RP11, 673E1.1, 673E1.4	upstream, gene, variant, intron, non, coding, transcript, splice, polypyrimidine, tract, region
rs9993457	4	144673517	T	C	0	-0.00377821	0.00740544	376502	3	HBA1C	RP13, 578N3.3	intron, variant, non, coding, transcript
rs261272	15	58608975	G	A	0	-0.00337316	0.00664869	84759	11	APOA	ALDH1A2	intron, variant, non, coding, transcript
rs147906242	6	34397628	G	A	0	0.00342399	0.00677482	226223	2	CAL	RPS10, NUDT3	upstream, gene, variant
rs117370183	6	160915695	C	A	0	-0.00326435	0.00650833	6383	6	CHO	LPAL2	intron, variant, non, coding, transcript
rs3769885	2	165592390	G	A	0	0.00321145	0.00642683	5101	3	TRIG	COBLL1	intron, variant, non, coding, transcript, NMD, downstream, gene
rs7090847	10	99189010	A	G	0	0.00317543	0.00635013	2432310	6	AST	PGAM1, AL355490.1	intron, variant, upstream, gene, non, coding, transcript, downstream
rs4661714	1	16495702	T	C	0	0.00327473	0.00656293	17647	4	GGT	.	intergenic, variant
rs2323333	4	144766590	T	C	0	-0.00362792	0.00728131	75437	3	HBA1C	RP13, 578N3.3	intron, variant, non, coding, transcript
rs17503142	11	14998776	C	G	0	-0.00349095	0.00715041	201987	8	VITD	CALCA, CALCB	upstream, gene, variant, intron
rs282608	13	113342349	T	C	0	-0.00314873	0.00642285	1579066	3	HBA1C	ATP11A, C13orf35	upstream, gene, variant, downstream
rs111329383	14	102908557	G	A	0	-0.00305293	0.0062363	145476	3	TPROT	TECPR2	intron, variant, non, coding, transcript
rs7558586	2	171757177	T	A	0	-0.0030637	0.00626315	1867579	3	ALP	.	intergenic, variant
rs4278348	1	66175395	C	T	0	-0.00397492	0.00816235	3439	6	CRP	.	intergenic, variant
rs3828591	5	32713108	G	C	0	0.00384559	0.00791071	62254	3	SBP	NPR3	intron, variant, non, coding, transcript
rs139927819	1	21953051	G	A	0	0.0030391	0.00630894	111319	13	ALP	RAP1GAP	intron, variant, non, coding, transcript, upstream, gene, NMD
rs1149994	10	9355284	G	A	0	-0.00329694	0.00690085	41965	5	CAL	.	intergenic, variant
rs2302593	19	46196634	C	G	0	0.00300793	0.00630213	3006382	3	URA	QPCTL, SNRPD2	intron, variant, upstream, gene, NMD, transcript
rs117865497	16	2140843	G	T	0	0.00286802	0.00603533	2215513	5	IGF1	TSC2, PKD1, MIR1225, RP11, 304L19.1, 304L19.3	downstream, gene, variant, intron, upstream, non, coding, transcript
rs117288230	17	45836727	G	A	0	0.00284574	0.0060238	4058313	3	TRIG	.	intergenic, variant
rs2765229	6	28892919	T	A	0	-0.00317123	0.00685705	3167770	5	URT	TRIM27	upstream, gene, variant
rs34335422	2	27513942	C	T	0	-0.00452417	0.00950837	755686	8	TRIG	TRIM54	intron, variant
rs58529372	3	121925798	G	T	0	0.00294203	0.00633629	194286	8	CAL	CASR	intron, variant
rs4915853	1	63191577	A	C	0	0.00388305	0.00822601	250594	2	APOB	.	intergenic, variant
rs41434449	15	64448460	A	T	0	-0.00278771	0.00604022	3493754	3	GGT	PPIB, SNX22	intron, variant, 3, prime, UTR, non, coding, transcript, exon, downstream, gene
rs282623	13	113440218	C	T	0	0.00277748	0.00603976	1676935	3	HBA1C	ATP11A	intron, variant, non, coding, transcript
rs4342150	4	144796354	T	G	0	0.00315426	0.00689517	212187	5	HBA1C	GYPE	intron, variant, downstream, gene, NMD, transcript
rs12982234	19	38586434	C	T	0	0.00269917	0.00595016	3022803	3	CAL	SIPA1L3	intron, variant, upstream, gene
rs116505225	5	33139201	T	C	0	-0.00304339	0.00669661	363839	3	SBP	CTD, 2066L21.3	intron, variant, non, coding, transcript
rs17100	8	23720240	G	A	0	0.0028043	0.00623141	1598	3	CREA	.	intergenic, variant
rs3806598	2	234579892	A	C	0	-0.00671688	0.0147108	608807	15	TBIL	UGT1A10, UGT1A9, UGT1A8	intron, variant, upstream, gene
rs140213952	10	97585397	C	T	0	0.00262668	0.00588219	4035923	5	AST	ENTPD1, AS1	intron, variant, non, coding, transcript
rs78716403	1	155954084	C	G	0	-0.00261066	0.00585261	747809	4	GGT	ARHGEF2, RP11, 336K24.12	intron, variant, downstream, gene, non, coding, transcript
rs1718207	12	121185997	A	G	0	-0.00268994	0.00603935	270284	6	GGT	RP11, 173P15.7	intron, variant, non, coding, transcript
rs148931404	16	56914455	G	A	0	-0.00291756	0.00652657	488397	13	HDL	SLC12A3	intron, variant
rs7584099	2	148478336	A	G	0	0.00374537	0.00828419	102318	2	CREA	.	intergenic, variant
rs78670645	9	38079463	C	T	0	0.00259069	0.00585443	4964843	2	AST	.	intergenic, variant
rs78687543	1	22042732	T	C	0	0.00267085	0.00606224	45906	6	PHOS	USP48	intron, variant, non, coding, transcript, downstream, gene
rs7612244	3	122300452	T	C	0	-0.00269066	0.00615922	662	7	CAL	PARP15	intron, variant
rs73232570	12	97591525	G	A	0	-0.00252524	0.00578526	3464415	3	SHBG	.	intergenic, variant
rs72688041	8	81315301	C	T	0	0.00253273	0.00581906	14563	3	SHBG	RNU6, 1213P	upstream, gene, variant
rs114381007	1	58884454	G	T	0	0.00248564	0.00572333	3358941	3	APOB	OMA1, DAB1	intron, variant, non, coding, transcript
rs189726510	2	161169524	C	T	0	-0.00246109	0.00567797	4427967	4	TRIG	RBMS1	intron, variant, non, coding, transcript
rs2425158	20	34419664	T	C	0	0.00265373	0.00609735	4724867	4	CHO	PHF20	intron, variant, NMD, transcript, non, coding
rs6922489	6	166262523	A	G	0	-0.00260362	0.00607634	135458	2	IGF1	PDE10A	intron, variant, non, coding, transcript
rs9525216	13	114811917	A	G	0	0.0024442	0.00570746	3048634	3	HBA1C	RASA3	intron, variant
rs6461296	7	17131935	C	G	0	0.00242744	0.00569259	167578	2	TBIL	.	intergenic, variant
rs76388103	18	58430041	A	G	0	0.0024521	0.0057515	697157	2	BMI	RP11, 325K19.1	intron, variant, non, coding, transcript
rs112689575	1	159550965	G	A	0	-0.00241461	0.00568023	232056	12	CRP	OR10AE1P	downstream, gene, variant
rs79167813	15	53132289	C	T	0	0.00239377	0.00563733	835663	3	CREA	.	intergenic, variant
rs78550355	2	167122269	A	T	0	0.00238262	0.00561524	2645761	9	HBA1C	SCN9A, AC010127.3	intron, variant, non, coding, transcript
rs78170528	12	4000194	T	G	0	-0.00228893	0.00541734	2490154	2	CAL	RP11, 664D1.1	intron, variant, non, coding, transcript
rs618482	12	121200609	T	C	0	-0.00322934	0.00766454	7382	7	CRP	SPPL3, RP11, 173P15.7	3, prime, UTR, variant, downstream, gene, upstream
rs35620248	3	49737954	G	A	0	-0.00234153	0.00562479	22826	3	HBA1C	RNF123	missense, variant, downstream, gene, NMD, transcript, non, coding, exon
rs62123960	19	35535289	A	G	0	0.00230388	0.00558378	28342	4	ALB	HPN, SCN1B	intron, variant, downstream, gene, upstream, non, coding, transcript
rs78869064	12	4601882	T	C	0	0.00217268	0.00529184	2488581	3	PHOS	C12orf4	intron, variant, NMD, transcript
rs551272312	1	161800987	C	T	0	-0.00229139	0.00560418	324356	5	TPROT	ATF6	intron, variant
rs116432301	1	66681545	G	A	0	0.00223869	0.00548292	509589	5	CRP	PDE4B	intron, variant, non, coding, transcript
rs1311621	4	100014018	T	C	0	0.00232345	0.00570446	2915010	3	AST	ADH5, RP11, 696N14.1	upstream, gene, variant, intron, non, coding, transcript
rs28494948	8	8989108	C	G	0	0.00223576	0.00550906	187447	3	HDL	PPP1R3B	downstream, gene, variant
rs2698718	7	26403647	G	A	0	-0.0022114	0.00545444	406862	2	TRIG	SNX10	intron, variant, upstream, gene, downstream
rs7568960	2	48511434	A	G	0	-0.00241886	0.00594085	4672025	3	HBA1C	.	intergenic, variant
rs12742048	1	22114970	A	G	0	0.00242611	0.00599166	146091	5	PHOS	USP48	upstream, gene, variant
rs72725176	14	68525050	T	G	0	0.00215801	0.00535661	4496368	4	CRP	RAD51B	intron, variant, non, coding, transcript, NMD
rs6792686	3	170664588	A	G	0	-0.00222314	0.00550834	1520595	5	IGF1	.	intergenic, variant
rs79940403	20	40502352	T	G	0	0.00218188	0.00541858	541969	4	LDL	.	intergenic, variant
rs667476	15	44173755	A	C	0	-0.00215239	0.00536529	676160	2	ALB	FRMD5	intron, variant, NMD, transcript, non, coding
rs164149	1	162338581	T	C	0	-0.00216874	0.00541529	861950	6	TPROT	NOS1AP, C1orf111, C1orf226, RP11, 565P22.6	3, prime, UTR, variant, intron, NMD, transcript, downstream, gene
rs4948525	10	60361270	A	G	0	0.00283223	0.0069788	74352	1	URT	BICC1	intron, variant
rs117533631	10	100839013	C	G	0	-0.00229416	0.00576556	1200403	6	AST	HPSE2	intron, variant
rs10750766	11	65473798	A	C	0	0.00216357	0.00546656	894689	6	URT	.	intergenic, variant
rs144848827	11	116813940	T	C	0	-0.00220247	0.00557235	63841	6	APOA	SIK3	intron, variant, NMD, transcript, non, coding
rs34801630	3	46007846	C	T	0	-0.00300508	0.0074851	88316	2	AST	FYCO1	missense, variant
rs75841596	19	14164629	C	T	0	-0.00209253	0.0053046	3688539	3	IGF1	IL27RA, PALM3	downstream, gene, variant, missense
rs8208	15	40328665	A	G	0	0.00204737	0.00521594	1028929	4	CREA	EIF2AK4, SRP14, AS1	downstream, gene, variant, synonymous, upstream, non, coding, transcript, exon
rs67690745	15	58533268	G	A	0	0.00210792	0.00538629	160466	12	APOA	ALDH1A2	intron, variant, non, coding, transcript, downstream, gene
rs10521070	9	107156378	C	T	0	-0.00240532	0.00611062	479270	7	APOA	.	intergenic, variant
rs2667938	17	41056929	A	G	0	0.0020458	0.00525913	721485	5	HDL	G6PC	intron, variant, downstream, gene
rs10998715	10	71082700	G	A	0	0.00207436	0.00540056	27872	12	HBA1C	HK1	intron, variant, non, coding, transcript
rs185637941	3	172002956	C	T	0	0.00198113	0.00516629	183940	3	HBA1C	FNDC3B	intron, variant, non, coding, transcript
rs75910855	20	42916802	G	A	0	0.00196398	0.00514927	3140237	4	CHO	.	intergenic, variant
rs79834223	2	57945397	T	C	0	-0.00196076	0.0051469	956240	3	BMI	.	intergenic, variant
rs116313477	1	158598860	C	T	0	-0.00201337	0.00530021	47822	5	HBA1C	SPTA1	intron, variant, non, coding, transcript
rs182596077	2	47004495	G	C	0	-0.00196797	0.005186	3165086	3	HBA1C	RP11, 333I13.1	upstream, gene, variant
rs12419658	11	68088060	G	A	0	-0.00190511	0.00505001	3072742	3	VITD	LRP5	intron, variant, NMD, transcript
rs62076145	17	80926946	A	G	0	0.00192435	0.00512953	2400886	8	HBA1C	B3GNTL1	intron, variant, non, coding, transcript, NMD
rs62223645	21	38528987	G	A	0	-0.0019089	0.00509934	1078035	3	IGF1	TTC3	missense, variant, downstream, gene, upstream, non, coding, transcript, exon
rs12142017	1	154980341	T	C	0	-0.00196492	0.00526516	225934	3	URT	ZBTB7B	intron, variant, non, coding, transcript
rs116250057	1	238226586	G	T	0	-0.00188761	0.00507188	3376723	3	APOB	.	intergenic, variant
rs187564014	2	101260017	C	A	0	0.00178608	0.00482265	2405724	2	CAL	.	intergenic, variant
rs3127574	6	160791370	C	G	0	0.00290685	0.00769748	139022	2	SHBG	SLC22A3	intron, variant
rs182224324	8	123406434	A	G	0	-0.00181923	0.00494473	3658648	3	ALP	.	intergenic, variant
rs115458560	1	110061974	T	C	0	0.00185394	0.00504717	235655	6	APOB	.	intergenic, variant
rs112446867	19	3363458	C	T	0	0.00177099	0.00483651	1948047	4	SHBG	NFIC	upstream, gene, variant, intron
rs175505	14	75529619	T	C	0	0.00182213	0.00497504	2508201	2	ALP	ACYP1, ZC2HC1C	intron, variant, upstream, gene, downstream
rs72825175	17	37561131	C	A	0	-0.00184682	0.00504729	4494950	6	HDL	FBXL20, MED1, CTB, 131K11.1	upstream, gene, variant, downstream, 3, prime, UTR, intron, non, coding, transcript
rs11265002	1	158489063	T	C	0	-0.00440742	0.011753	61975	1	HBA1C	RP11, 144L1.8, OR10R1P	upstream, gene, variant, downstream
rs183641528	1	154499328	G	A	0	0.00185625	0.00507138	4976296	11	CRP	TDRD10	intron, variant, non, coding, transcript
rs4233335	1	89408073	C	A	0	-0.00264695	0.00711404	268031	2	GGT	CCBL2	intron, variant, non, coding, transcript
rs390123	20	25480105	C	G	0	0.00465184	0.0123671	124307	1	ALP	NINL	intron, variant, upstream, gene
rs75846955	22	23908369	C	T	0	0.00180918	0.00496147	1094360	13	GGT	AP000345.2	upstream, gene, variant
rs62117487	19	8424060	A	G	0	-0.00199422	0.00545765	480	3	HDL	ANGPTL4	upstream, gene, variant
rs2819990	6	20752331	G	C	0	0.00193973	0.00534901	4625335	6	HBA1C	CDKAL1, RP3, 348I23.2	intron, variant, downstream, gene
rs114056737	4	9991519	C	T	0	-0.00192975	0.00530523	571851	12	URT	SLC2A9	intron, variant, non, coding, transcript
rs591516	1	155682613	C	G	0	0.00180152	0.00497479	476338	3	CAL	DAP3, RP11, 243J18.2, MSTO1, MSTO2P	intron, variant, upstream, gene, non, coding, transcript
rs6996954	8	81582148	T	C	0	0.00183119	0.00505105	168768	3	SHBG	ZNF704	intron, variant, downstream, gene, non, coding, transcript
rs2974753	19	13061450	A	G	0	-0.00177179	0.00490518	4221132	2	HBA1C	RAD23A, GADD45GIP1	intron, variant, downstream, gene, NMD, transcript, upstream
rs73072330	3	48165089	G	A	0	0.00173303	0.00483906	1743707	2	BMI	RP11, 1029M24.1	upstream, gene, variant
rs9675910	18	47480985	G	A	0	-0.00177056	0.00495514	149886	6	APOA	MYO5B	intron, variant
9:140648752_C_T	9	140648752	C	T	0	-0.00174642	0.00488521	4459608	12	ALP	EHMT1	intron, variant, non, coding, transcript, NMD
rs209152	6	28846462	G	A	0	-0.00191257	0.00539992	2926837	5	URT	.	intergenic, variant
rs17235322	18	56041180	A	G	0	0.00176619	0.00496464	109869	3	GGT	NEDD4L, RP11, 845C23.2	intron, variant, downstream, gene, non, coding, transcript
rs4671117	2	65360169	A	G	0	-0.00171102	0.0048173	401315	3	SHBG	RAB1A	upstream, gene, variant
rs10192894	2	62838936	A	G	0	-0.00172301	0.00485233	3937299	2	BMI	AC092155.4	downstream, gene, variant, intron, non, coding, transcript
rs1234396	2	148785781	T	C	0	-0.00251686	0.00697118	205127	2	CREA	MBD5	intron, variant, non, coding, transcript, downstream, gene
rs60808669	15	58699199	T	G	0	0.00176451	0.0049765	38040	12	APOA	LIPC, ALDH1A2	upstream, gene, variant, intron, non, coding, transcript
rs2972561	19	45340021	T	C	0	-0.00173502	0.00489873	65824	5	APOA	.	intergenic, variant
rs112498026	12	116589654	T	G	0	-0.00176965	0.00498891	4411349	3	TBIL	MED13L, MIR620	intron, variant, upstream, gene, non, coding, transcript
rs41278520	10	70452260	A	G	0	0.00176251	0.00497307	602568	11	HBA1C	TET1	3, prime, UTR, variant
rs73054612	19	47048153	C	G	0	-0.00172072	0.00486532	2154863	2	ALP	PPP5D1, AC011551.3	intron, variant, non, coding, transcript, downstream, gene
rs79417326	7	98145213	C	T	0	-0.00166728	0.00472971	126671	2	SHBG	.	intergenic, variant
rs6697198	1	109168398	G	C	0	-0.00169946	0.00482313	1188940	2	TPROT	FAM102B	intron, variant, non, coding, transcript, exon
rs9319962	18	57864141	G	T	0	0.00173505	0.00494037	131257	3	BMI	RP11, 795H16.2	non, coding, transcript, exon, variant
rs116478188	6	24498036	G	A	0	-0.0017879	0.00510493	70715	12	ALP	ALDH5A1, GPLD1	intron, variant, upstream, gene
rs6924052	6	26670492	T	C	0	0.00165208	0.00475802	4770095	2	GGT	.	intergenic, variant
rs115359175	2	20107897	C	T	0	-0.00163836	0.00474925	1117128	3	TRIG	WDR35	downstream, gene, variant
rs72727783	15	47205543	C	A	0	0.00158472	0.0046046	2355628	2	TPROT	.	intergenic, variant
rs114714236	1	158645754	T	C	0	0.00174516	0.0050526	94716	5	HBA1C	SPTA1	intron, variant, downstream, gene
rs10074736	5	72108001	T	C	0	-0.00263815	0.00750645	230410	3	ALB	TNPO1, CTD, 2631K10.1	upstream, gene, variant, intron, non, coding, transcript
rs12901036	15	62269996	T	G	0	-0.00192758	0.00556231	66433	3	IGF1	VPS13C	intron, variant
rs6985506	8	81251183	G	C	0	0.00165115	0.00479607	162197	3	SHBG	RP11, 941H19.3	intron, variant, non, coding, transcript
rs1077829	19	54932733	C	T	0	-0.00163214	0.0047447	498667	3	AST	TTYH1	intron, variant, NMD, transcript, non, coding, downstream, gene, upstream
rs8102677	19	4018100	A	G	0	-0.00157586	0.00465152	4406440	3	HDL	PIAS4	intron, variant, downstream, gene, upstream, non, coding, transcript
rs6601530	8	10671272	A	G	0	-0.00195343	0.00575082	1450495	6	ALP	PINX1, SOX7	intron, variant, NMD, transcript
rs17272847	19	49979398	G	A	0	-0.0015736	0.00466343	4454668	2	AST	FLT3LG, CTD, 3148I10.15, 3148I10.9	splice, polypyrimidine, tract, variant, region, intron, non, coding, transcript, upstream, gene, exon, NMD, missense
rs56132500	16	57059241	G	C	0	-0.00166174	0.00492102	148748	13	HDL	NLRC5	intron, variant, upstream, gene, downstream, NMD, transcript
rs45555735	17	42327418	G	A	0	0.00153123	0.00454816	271337	4	APOA	SLC4A1, AC003102.1	3, prime, UTR, variant, upstream, gene
rs79291777	1	157958440	C	A	0	0.00164497	0.0048694	592598	5	HBA1C	KIRREL	upstream, gene, variant
rs72645662	4	72681568	C	T	0	0.00158001	0.00469629	78840	8	VITD	.	intergenic, variant
rs175432	14	75615246	G	C	0	0.00153758	0.00459641	2593828	2	ALP	TMED10	intron, variant, upstream, gene, non, coding, transcript, NMD
rs2529535	17	42916817	A	C	0	0.00151577	0.00454044	4028200	3	HDL	.	intergenic, variant
rs7540096	1	161721351	A	G	0	0.00166916	0.00502073	24787	6	TPROT	DUSP12	intron, variant, upstream, gene, NMD, transcript
rs1927695	6	25378113	A	G	0	0.00157408	0.00473369	715680	5	HBA1C	LRRC16A	intron, variant, non, coding, transcript
rs182550224	11	5177811	C	T	0	-0.00143817	0.00436945	2395228	4	ALP	OR52A1	upstream, gene, variant, intron
rs114098392	2	214159348	A	C	0	-0.00149336	0.00452869	3501042	2	CREA	SPAG16	intron, variant, upstream, gene, NMD, transcript
rs7454595	6	160995956	T	C	0	-0.00161503	0.00489768	8377	6	CHO	LPA	intron, variant
rs117737863	11	62870389	A	G	0	-0.00147478	0.00447988	1455505	5	URT	SLC22A24	intron, variant
rs227731	17	54773238	T	G	0	-0.00143482	0.0043969	4503488	5	CREA	.	intergenic, variant
rs1371351	11	96525429	T	C	0	0.0014606	0.00447262	3797373	2	HBA1C	RP11, 360K13.1	intron, variant, non, coding, transcript
rs1053051	12	107367225	T	C	0	-0.00211859	0.00639023	69829	3	PHOS	MTERFD3, C12orf23	downstream, gene, variant, 3, prime, UTR, intron, non, coding, transcript
rs3935700	8	42364121	C	T	0	0.00278442	0.00836693	2320440	6	HBA1C	SLC20A2	intron, variant, upstream, gene, NMD, transcript, non, coding
rs16950730	12	121482954	A	G	0	0.00167265	0.0051279	82873	8	CRP	.	intergenic, variant
rs514615	11	111921108	C	T	0	0.00144806	0.00446655	4754229	14	TRIG	DLAT	intron, variant, NMD, transcript
rs10853029	17	59396449	T	C	0	-0.00141782	0.00438733	4813066	2	SHBG	BCAS3	intron, variant, non, coding, transcript
rs185172215	17	66236738	C	G	0	0.00140578	0.00435982	4020160	6	IGF1	.	intergenic, variant
rs7247090	19	38013411	T	A	0	0.00157132	0.00485522	4641672	5	CREA	ZNF793	upstream, gene, variant, intron
rs72724631	8	126649924	A	G	0	-0.00144114	0.00448875	171885	3	CHO	.	intergenic, variant
rs115793604	4	10048667	T	C	0	-0.00182005	0.00588544	120234	14	URT	SLC2A9	intron, variant
rs2681424	3	121769522	T	C	0	0.00145564	0.0045525	354437	8	CAL	CD86	upstream, gene, variant
rs141267536	10	97668630	A	G	0	0.00141832	0.00443927	4370786	6	AST	ENTPD1, AS1, C10orf131, RP11, 248J23.7	upstream, gene, variant, intron, non, coding, transcript, NMD
rs36114239	8	126043324	T	C	0	0.00142993	0.00448037	434715	3	CHO	KIAA0196	intron, variant, non, coding, transcript
rs118072370	16	89171494	C	T	0	0.00140816	0.00442677	2577175	3	SHBG	ACSF3	intron, variant, downstream, gene, NMD, transcript
rs72921663	18	46596807	C	T	0	0.00433826	0.0133964	1089620	5	HDL	DYM	intron, variant
rs76569056	10	114557169	C	G	0	0.00138778	0.00438148	236688	3	HBA1C	VTI1A	intron, variant
rs2625408	1	21979230	T	C	0	0.00148394	0.00470027	109408	6	PHOS	RAP1GAP	upstream, gene, variant, intron, non, coding, transcript, NMD
rs78548599	9	107592356	C	T	0	0.00137597	0.00438521	43292	3	CHO	ABCA1	intron, variant, non, coding, transcript
rs117872759	12	120008054	A	G	0	-0.00135776	0.0043331	1185173	8	CRP	RP11, 768F21.1	intron, variant, non, coding, transcript
rs17327630	20	29976949	C	A	0	0.00131165	0.00419719	3751683	3	CREA	DEFB119	intron, variant, missense, non, coding, transcript
rs4711751	6	43828582	C	T	0	-0.00135961	0.00434285	66668	3	HDL	.	intergenic, variant
rs6675402	1	110491212	T	C	0	0.00134257	0.00430787	258256	2	HDL	.	intergenic, variant
rs7253870	19	38365063	A	G	0	-0.00148499	0.00473905	4965101	5	CREA	.	intergenic, variant
rs10739390	9	115988489	T	A	0	-0.00134178	0.00431554	1169972	2	AST	FKBP15, SLC31A1	upstream, gene, variant, intron, non, coding, transcript
rs638742	11	122025938	G	C	0	-0.00132731	0.00428147	4919657	14	TRIG	MIR100, RP11, 820L6.1	upstream, gene, variant, downstream
rs147460518	1	58561060	T	C	0	0.00131058	0.00423949	4626397	2	APOA	DAB1	intron, variant, non, coding, transcript
rs72656925	12	120472418	A	G	0	-0.00134096	0.00433566	720809	7	GGT	CCDC64	intron, variant, NMD, transcript
rs7531602	1	151217329	G	A	0	0.00130506	0.00424605	3351818	2	ALP	PIP5K1A	intron, variant, downstream, gene, non, coding, transcript
rs4072954	1	213742669	T	C	0	-0.00130419	0.00424591	405391	4	HBA1C	.	intergenic, variant
rs10410403	19	7018508	G	A	0	0.00129698	0.00423248	3457582	3	IGF1	CTB, 25J19.1	downstream, gene, variant
rs139978843	8	9243486	G	C	0	0.00134114	0.00437525	66931	4	HDL	RP11, 115J16.1, 115J16.2	intron, variant, non, coding, transcript
rs1915091	3	121832410	G	C	0	0.00136372	0.00445847	291549	8	CAL	CD86	intron, variant
rs7428430	3	50174184	C	T	0	0.00208798	0.00668886	265388	2	BMI	RP11, 493K19.3	intron, variant, non, coding, transcript
rs3132371	6	28773983	C	A	0	-0.00141763	0.0046404	2986521	5	URT	.	intergenic, variant
rs78933610	1	66091169	A	T	0	-0.00199968	0.00643587	80787	6	CRP	LEPR	intron, variant, downstream, gene
rs61941272	12	112116776	C	A	0	-0.00153264	0.00504768	61529	2	DBP	BRAP	intron, variant
rs12622361	2	632116	A	G	0	-0.00125061	0.0041197	2314839	3	BMI	.	intergenic, variant
rs117742079	6	126197704	A	G	0	0.0012681	0.0041711	809281	2	IGF1	NCOA7, RN7SKP56	intron, variant, downstream, gene
rs2193018	12	97601896	C	T	0	-0.0012869	0.00423509	3454044	4	SHBG	.	intergenic, variant
rs12064049	1	20067043	A	G	0	0.00126617	0.00417943	3535305	2	ALT	TMCO4	intron, variant, non, coding, transcript, upstream, gene
rs61729967	15	42104305	G	A	0	0.00122459	0.00406652	2745610	3	TPROT	MAPKBP1	missense, variant, non, coding, transcript, exon, upstream, gene, 3, prime, UTR, NMD, downstream
rs7845503	8	10059483	C	G	0	0.00139073	0.00460314	838706	6	ALP	MSRA	intron, variant, non, coding, transcript
rs10438299	15	41871908	T	G	0	-0.00121171	0.00404921	2978007	2	TRIG	TYRO3	downstream, gene, variant
rs9693714	8	122555016	C	A	0	-0.00122195	0.0041193	3923023	3	TRIG	AC022909.1	downstream, gene, variant
rs148092923	15	59128111	T	C	0	-0.00120796	0.00411102	397038	4	CHO	FAM63B	intron, variant, NMD, transcript, downstream, gene
rs11942655	4	145661651	G	C	0	-0.00118448	0.00404156	970498	5	HBA1C	HHIP	3, prime, UTR, variant, downstream, gene
rs116084959	3	52392389	G	C	0	0.0011787	0.00402774	2483593	2	BMI	DNAH1	intron, variant, upstream, gene, non, coding, transcript, downstream
rs4839248	1	113044244	A	G	0	-0.00131163	0.00446528	212395	3	CREA	WNT2B	intron, variant
rs72741932	9	74679274	A	T	0	-0.00112123	0.0038628	1699490	2	CREA	C9orf57	upstream, gene, variant, intron
rs111415796	15	47632005	A	G	0	-0.00113586	0.00391745	2782090	3	TRIG	SEMA6D	intron, variant
rs6701295	1	156148165	T	C	0	0.00118419	0.00409372	941890	3	URA	SEMA4A	downstream, gene, variant
rs181631645	11	14152413	T	C	0	0.00160151	0.00575159	644376	5	VITD	SPON1, RNA5SP332	intron, variant, non, coding, transcript, upstream, gene
rs79992588	17	59145918	T	C	0	0.0011117	0.00388567	2844411	7	IGF1	BCAS3, AC005884.1, RP11, 264B14.1, 264B14.2	intron, variant, upstream, gene, non, coding, transcript, downstream
rs115709258	1	150312332	C	T	0	-0.000996487	0.00353969	3118367	2	URT	PRPF3	intron, variant, non, coding, transcript, downstream, gene, upstream
rs75370733	18	43424771	A	C	0	0.00112453	0.00395956	160794	3	URA	EPG5, SIGLEC15	downstream, gene, variant
rs2376498	19	33760845	T	C	0	0.0011227	0.00397419	389106	5	CREA	.	intergenic, variant
rs117248712	10	75921804	G	A	0	-0.00109074	0.00387292	3651353	3	GGT	ADK	intron, variant, non, coding, transcript
rs144547388	4	72680373	G	T	0	-0.00127237	0.00454461	45920	8	VITD	.	intergenic, variant
rs9866473	3	171439698	G	A	0	0.00109119	0.00388285	379318	4	HBA1C	PLD1	intron, variant, downstream, gene, non, coding, transcript
rs139947401	6	161518885	C	T	0	-0.00109622	0.00390341	4608180	3	IGF1	MAP3K4	intron, variant, NMD, transcript, upstream, gene, non, coding
rs1810591	20	29471031	G	A	0	0.0010574	0.00377825	4257601	3	CREA	.	intergenic, variant
rs9893249	17	7570189	T	C	0	0.00139688	0.00498392	113112	13	SHBG	TP53	downstream, gene, variant, intron
rs11863628	16	88111869	A	T	0	0.00146272	0.00515044	1517550	3	SHBG	BANP, RP11, 863P13.5	downstream, gene, variant
rs17243374	6	24653566	G	A	0	0.00109459	0.00391464	249414	12	ALP	TDP2	intron, variant, downstream, gene, non, coding, transcript
rs755086	19	17148420	A	G	0	0.001086	0.00388955	2229928	4	TRIG	.	intergenic, variant
rs143234824	12	21319859	C	G	0	0.00179888	0.00630285	173967	10	TBIL	SLCO1B1, RP11, 125O5.2	intron, variant, NMD, transcript
rs118098891	15	44599883	G	A	0	-0.00104818	0.0037701	250032	2	IGF1	CASC4, AC090519.1, AC090519.4, AC090519.5	intron, variant, upstream, gene, downstream, non, coding, transcript, exon, NMD
rs350073	5	40222718	T	C	0	-0.00110494	0.0039689	687181	3	URA	.	intergenic, variant
rs116891695	12	104332224	C	T	0	-0.00105732	0.00381852	2965172	3	PHOS	HSP90B1	missense, variant, downstream, gene, non, coding, transcript, exon, upstream
rs58952930	22	18448255	T	C	0	-0.00103069	0.00373736	1293918	2	GGT	MICAL3	intron, variant, NMD, transcript
rs191284046	3	165907170	T	C	0	-0.00105484	0.00381989	4832260	2	GGT	.	intergenic, variant
rs150552973	6	23887816	C	T	0	-0.0014543	0.00520081	150156	12	ALP	.	intergenic, variant
rs4812297	20	59881438	A	G	0	0.00106219	0.00386038	3889059	2	HBA1C	CDH4	intron, variant
rs6073019	20	41827758	C	T	0	-0.00105075	0.00382196	1214210	2	CRP	RP1, 269M15.3	intron, variant, non, coding, transcript
rs11252996	10	5178552	G	A	0	0.00202715	0.00723394	108502	3	IGF1	AKR1C5P	upstream, gene, variant
rs4145930	10	70998738	A	G	0	0.00119983	0.00435792	56090	12	HBA1C	HKDC1	intron, variant
rs143728110	17	32886932	G	T	0	-0.00102339	0.00374717	4994589	3	CREA	.	intergenic, variant
rs138416405	4	9873822	T	C	0	-0.00113427	0.0041322	190147	13	URT	SLC2A9	intron, variant, non, coding, transcript
rs11605327	11	116823062	G	A	0	0.00136956	0.00500713	283219	2	APOA	SIK3	intron, variant, NMD, transcript, non, coding
rs12116433	1	159583483	C	T	0	-0.00105677	0.0038677	125840	8	CRP	.	intergenic, variant
rs55728704	5	75943399	G	A	0	-0.00101777	0.00373535	3604988	3	ALB	IQGAP2	intron, variant
rs4790428	17	3006529	C	T	0	0.0010449	0.00382847	4092048	9	ALP	.	intergenic, variant
rs193026304	4	9968146	G	C	0	-0.00117437	0.00430968	211877	13	URT	SLC2A9	intron, variant, non, coding, transcript
rs11714515	3	58410431	A	G	0	-0.00111262	0.00411348	125803	3	AST	PDHB, PXK, RP11, 802O23.3	downstream, gene, variant, intron, NMD, transcript, upstream
rs62521592	8	126633531	C	T	0	0.00102785	0.00379866	155492	2	ALT	.	intergenic, variant
rs11591780	10	104225316	C	G	0	-0.00119041	0.00439587	195	5	ALP	TMEM180, RP11, 18I14.10	intron, variant, upstream, gene, downstream
rs74868904	12	48420596	C	T	0	-0.00102045	0.00379161	207521	4	HBA1C	RP1, 228P16.4, 228P16.5	downstream, gene, variant, upstream
rs193239997	18	58639547	T	C	0	0.00102983	0.00382309	906663	3	BMI	.	intergenic, variant
rs1970983	17	5893195	G	A	0	0.000969764	0.00361458	1757336	3	ALB	WSCD1	intron, variant
rs17322552	6	25779925	G	A	0	0.00110675	0.00413722	139700	6	URT	SLC17A1, SLC17A4	downstream, gene, variant, 3, prime, UTR
rs141308922	8	145793102	T	C	0	0.000930465	0.00351584	2153135	3	ALT	ARHGAP39, AC084125.3	intron, variant, downstream, gene
rs8066055	17	64568627	C	T	0	-0.00095893	0.00361729	2352049	7	IGF1	PRKCA	intron, variant, NMD, transcript
rs11208683	1	66063341	T	C	0	0.00107894	0.00406584	279799	6	CRP	LEPR	intron, variant, non, coding, transcript
rs7294902	12	112354531	T	C	0	0.00102054	0.00384883	641771	4	DBP	.	intergenic, variant
rs141188347	1	155971372	A	T	0	0.00098059	0.00370176	765097	3	URA	RP11, 336K24.5, ARHGEF2	non, coding, transcript, exon, variant, intron
rs1370584	2	20102018	T	G	0	-0.00100791	0.00380025	1123007	3	APOA	TTC32, RP11, 79O8.1	upstream, gene, variant, non, coding, transcript, exon
rs7664804	4	146688852	A	G	0	0.00109537	0.00414114	121278	5	GGT	ZNF827, C4orf51	intron, variant, upstream, gene, non, coding, transcript
rs10858248	9	139108324	G	A	0	0.000978604	0.00369252	2919180	12	ALP	QSOX2	intron, variant
rs34935424	5	68595584	T	C	0	0.00114439	0.00428681	3742827	3	AST	CCDC125	intron, variant, non, coding, transcript
rs661647	12	121282659	C	T	0	-0.00133348	0.00504608	299885	7	CRP	SPPL3, ARF1P2	intron, variant, downstream, gene
rs654585	1	23514714	T	C	0	-0.00095875	0.00363592	3781410	2	IGF1	HTR1D	downstream, gene, variant
rs115443720	1	157189656	C	T	0	0.000956966	0.00363805	1983381	3	CAL	.	intergenic, variant
rs12222793	11	92667047	A	G	0	-0.000984239	0.00374686	61009	3	HBA1C	SNRPGP16	upstream, gene, variant
rs72866064	6	42915166	T	G	0	0.00104999	0.00401038	35506	3	APOB	RP3, 475N16.1	downstream, gene, variant, intron, non, coding, transcript
rs2236568	10	82035923	C	A	0	0.000941713	0.00360097	2462766	4	GGT	MAT1A	intron, variant, downstream, gene, upstream
rs147943823	8	80238801	T	C	0	0.000953931	0.00364504	3747394	2	URT	.	intergenic, variant
rs146808481	1	22052453	C	G	0	0.000973479	0.00371925	83574	13	ALP	USP48	intron, variant, downstream, gene, upstream, non, coding, transcript
rs68010911	2	174718092	A	G	0	0.000950422	0.00363442	4950062	9	HBA1C	.	intergenic, variant
rs75762752	15	62194263	C	A	0	-0.0011242	0.00428099	142166	2	IGF1	VPS13C	intron, variant, downstream, gene
rs6465120	7	76036364	A	G	0	0.000917683	0.00353139	2938275	4	TRIG	SRCRB4D, ZP3	intron, variant
rs7257115	19	16457348	C	T	0	-0.000930675	0.00358603	847695	3	SHBG	.	intergenic, variant
rs117450180	8	22197113	G	A	0	0.000940614	0.0036262	1524725	2	URT	PIWIL2	intron, variant
rs9482956	6	129238604	A	G	0	-0.000924164	0.00356765	2231619	3	IGF1	LAMA2	intron, variant, non, coding, transcript
rs351184	15	74598258	G	A	0	-0.000918778	0.00354924	1691134	2	CREA	CCDC33, RP11, 60L3.2	intron, variant, downstream, gene
rs114301631	6	24457565	C	A	0	-0.00100331	0.00388286	208650	12	ALP	GPLD1	intron, variant
rs75613164	10	70366398	T	C	0	0.000959652	0.0037076	306158	12	HBA1C	TET1	intron, variant
rs189512639	5	41087217	C	G	0	-0.000965329	0.00373686	177318	3	URA	.	intergenic, variant
rs79634051	11	14561945	G	C	0	-0.00136934	0.00526922	256567	8	VITD	PSMA1	intron, variant
rs146931915	10	101787464	C	T	0	-0.000918666	0.00358038	30439	3	ALT	.	intergenic, variant
rs28623660	1	30051330	A	C	0	0.000902812	0.00352181	2755206	3	IGF1	.	intergenic, variant
rs41302087	1	145515287	G	C	0	0.000813722	0.00321086	1678678	3	URT	GNRHR2, RBM8A, PEX11B	non, coding, transcript, exon, variant, downstream, gene, upstream
rs738703	20	34190699	T	C	0	0.000983466	0.00382968	4953832	5	CHO	FER1L4	intron, variant, non, coding, transcript, upstream, gene, downstream
rs143527925	17	7422338	A	G	0	0.00092815	0.0036302	377700	9	ALP	POLR2A	downstream, gene, variant
rs72728773	8	130018538	C	G	0	-0.000906219	0.00355376	3540499	2	CREA	.	intergenic, variant
rs61380083	1	159604428	C	A	0	-0.000926	0.00363463	4958359	11	CRP	.	intergenic, variant
rs62112271	19	38381508	T	C	0	-0.000964909	0.00378298	4981546	5	CREA	WDR87	intron, variant
rs1056847	1	151288172	A	G	0	0.000893417	0.00351495	3918103	3	URT	PI4KB	synonymous, variant, intron
rs61815115	1	151783324	T	G	0	0.000885454	0.003494	2743194	12	CRP	RORC, LINGO4	intron, variant, upstream, gene, non, coding, transcript
rs10995016	10	63789374	T	C	0	-0.000895875	0.00354038	1404149	2	TRIG	ARID5B	intron, variant
rs10892070	11	116951533	G	A	0	0.0011742	0.00464354	190192	2	APOA	SIK3	intron, variant, NMD, transcript, non, coding
rs62122155	19	35511423	C	T	0	0.000908905	0.00359858	52208	4	ALB	GRAMD1A, CTD, 2527I21.14	intron, variant, non, coding, transcript, NMD, upstream, gene
rs2140551	2	48822381	A	G	0	-0.00096848	0.00383466	4982972	3	HBA1C	STON1, GTF2A1L	intron, variant, synonymous, 3, prime, UTR, NMD, transcript
rs111578464	19	33282145	T	G	0	-0.00091945	0.00366105	89594	5	CREA	TDRD12	downstream, gene, variant, intron
rs559566	11	64581658	A	G	0	-0.000888349	0.00355258	255764	6	URT	MEN1	upstream, gene, variant
rs75947283	9	37747864	C	T	0	0.000880976	0.00353106	4633244	2	AST	FRMPD1, RP11, 613M10.9	downstream, gene, variant, intron, NMD, transcript
rs116899466	10	61396234	G	A	0	0.000957228	0.00383754	1109316	5	URT	.	intergenic, variant
rs76642023	8	128466139	G	A	0	-0.000858771	0.0034585	1988100	2	ALT	CASC8	intron, variant, non, coding, transcript
rs15052	19	41813375	T	C	0	-0.000855263	0.00344638	3592470	6	APOA	HNRNPUL1, CCDC97, TGFB1	downstream, gene, variant, upstream, 3, prime, UTR, intron
rs149503794	16	84252757	A	T	0	-0.000853809	0.00345099	2764386	6	HBA1C	KCNG4	downstream, gene, variant
rs77626104	6	108871057	G	C	0	-0.000876041	0.00354678	8720	2	IGF1	RP11, 697G4.4	downstream, gene, variant
rs74441897	17	5789811	C	T	0	-0.000819761	0.00332848	1653952	3	ALB	WSCD1	intron, variant, non, coding, transcript
rs35927325	11	63882495	C	T	0	-0.000833959	0.00338454	2254091	2	APOB	FLRT1, MACROD1, RP11, 21A7A.3	intron, variant, non, coding, transcript, downstream, gene
rs2371512	5	40130943	G	T	0	-0.000868007	0.00352186	778956	3	URA	.	intergenic, variant
rs117642176	22	25411668	T	C	0	0.000846059	0.00344027	437050	13	GGT	KIAA1671	intron, variant
rs524430	10	104541500	A	C	0	-0.000994472	0.00402141	316379	5	ALP	WBP1L	intron, variant
rs61941283	12	112272138	G	A	0	-0.000983377	0.00403207	88491	2	DBP	.	intergenic, variant
rs41307925	1	27248275	C	T	0	0.000822241	0.00335867	1542464	2	APOB	NUDC	5, prime, UTR, variant, intron, upstream, gene
rs113893318	3	49512662	C	T	0	-0.000837996	0.00342336	248118	3	HBA1C	DAG1	intron, variant, non, coding, transcript
rs16542	17	37366429	G	A	0	-0.000856837	0.00350082	4411985	5	HDL	STAC2	downstream, gene, variant
rs12974373	19	10362425	T	C	0	-0.000838271	0.00342998	231814	3	IGF1	MRPL4, CTD, 2369P2.5	upstream, gene, variant, downstream
rs117761837	19	7708058	C	T	0	0.000822796	0.00337214	3817118	2	SBP	STXBP2, CTD, 3214H19.4	missense, variant, downstream, gene, upstream, non, coding, transcript, exon, intron, NMD, 3, prime, UTR
rs72827147	17	37740912	T	G	0	-0.000847835	0.003478	4315169	6	HDL	.	intergenic, variant
rs729616	2	23652025	C	A	0	-0.000824116	0.00338809	2427000	2	CHO	KLHL29	intron, variant
rs142127371	6	131121691	T	A	0	0.000811186	0.00334168	4114706	3	IGF1	.	intergenic, variant
rs10107121	8	41664298	T	C	0	-0.000806402	0.00332718	1441325	6	HBA1C	ANK1, Y, RNA	intron, variant, downstream, gene
rs143762202	17	57541292	C	T	0	0.00080526	0.00332284	1735434	2	PHOS	RP11, 567L7.6	intron, variant, non, coding, transcript
rs57285449	11	299411	C	G	0	0.000784489	0.00325043	2483172	5	ALP	IFITM5, ATHL1, RP11, 326C3.4	missense, variant, downstream, gene
rs140181495	1	147181110	T	C	0	0.000718879	0.00300202	12855	3	URT	.	intergenic, variant
rs77310638	17	53063205	T	G	0	0.000800001	0.00332201	284059	2	URT	STXBP4	intron, variant, non, coding, transcript
rs12985178	19	36029896	T	G	0	0.000833247	0.00346217	466265	4	ALB	GAPDHS, AD000090.2	intron, variant, downstream, gene, NMD, transcript
rs1318006	2	21214152	A	G	0	-0.000811128	0.00337983	10873	3	TRIG	.	intergenic, variant
rs76210562	6	25931900	C	A	0	-0.000921274	0.00382045	144438	6	URT	SLC17A2	upstream, gene, variant
rs72783862	10	16081641	C	T	0	-0.00079609	0.0033225	2167592	7	AST	.	intergenic, variant
rs35593157	17	76195679	T	C	0	0.000803498	0.00335822	2274472	8	HBA1C	AFMID	intron, variant, upstream, gene, downstream, NMD, transcript, non, coding
rs78893833	15	58688159	A	G	0	-0.000825031	0.00344108	5575	12	APOA	ALDH1A2	intron, variant, non, coding, transcript
rs11626384	14	98020801	G	A	0	-0.000797138	0.00333947	4099666	2	BMI	CTD, 2506J14.1	intron, variant, non, coding, transcript
rs138704134	10	65038937	G	A	0	0.00117105	0.00482271	143148	3	ALP	JMJD1C	intron, variant
rs3852861	19	45383061	G	T	0	0.000782269	0.00328566	4167332	3	ALP	PVRL2, CTB, 129P6.4	intron, variant, downstream, gene, upstream
rs115269440	18	77161840	C	A	0	0.000772554	0.00324905	2069478	3	CREA	NFATC1	intron, variant, NMD, transcript
rs111286300	10	101574521	T	C	0	-0.000787168	0.00331378	121083	4	ALT	ABCC2	intron, variant
rs12983444	19	18386367	G	A	0	0.00077193	0.00326459	1081324	4	SHBG	JUND, KIAA1683	downstream, gene, variant, upstream
rs12460033	19	46406698	G	A	0	-0.000808524	0.00341644	2796318	4	URA	MYPOP	upstream, gene, variant
rs74060017	1	21933467	T	C	0	-0.000762981	0.00323298	3358690	2	TPROT	RAP1GAP	intron, variant, NMD, transcript
rs2539984	2	63133584	C	G	0	0.000778662	0.00329563	4231947	3	BMI	EHBP1	intron, variant
[truncated: 176,029 more rows]
