# Supplementary material for: Transforming polygenic risk prediction: functional annotation and digital twin modeling with whole-exome sequencing
Source: Research Square preprint supplement (doi:10.21203/rs.3.rs-6169446/v1), 2025-03-10
Supplement: Supplementary file 7 [file b9c0379212ceeedd386c2a01.xlsx]

## Sheet: Description
Supplementary Data 7	Supplementary information on targeted phenome-wide association analysis and correlation analysis with IAF Metabolomics dataset (APOB WES PRS)
Table S1	Summary results of the targeted phenome-wide association analysis for the exome-based reference dataset. Summary results for the exome-based validation set (UK Biobank). Association analysis using logistic regression models. Models were adjusted for age, sex, and the 40 principal components obtained from the population structure analysis (PRS: polygenic risk score, SD: standard deviation, FDR: fa…
Table S2	Summary results of the targeted phenome-wide association analysis for the imputed array-based reference dataset. Summary results for the imputed array-based validation set (UK Biobank). Association analysis using logistic regression models. Models were adjusted for age, sex, and the 40 principal components obtained from the population structure analysis (PRS: polygenic risk score, SD: standard de…
Table S3	Correlation between WES APOB PRS from the target cohort and NMR Nightingale metabolomics dataset

## Sheet: Table S1
PRS	Outcome	Estimate	SD	T-value	P-value	FDR	OR	LCI (95%)	UCI (95%)
BMI	T2D	0.164205	0.0298141	5.50761	3.6374e-08	7.8204e-07	1.17846	1.11161	1.24943
HBA1C	T2D	0.150851	0.0300777	5.01539	5.29254e-07	1.1379e-05	1.16282	1.0963	1.2335
CRP	T2D	0.0883303	0.0300695	2.93754	0.00330828	0.0474187	1.09235	1.0299	1.15875
GLUC	T2D	0.0722405	0.0300083	2.40735	0.0160688	0.23032	1.07491	1.01356	1.14009
SBP	T2D	0.0712681	0.0298384	2.38847	0.0169186	0.2425	1.07387	1.01288	1.13857
GGT	T2D	0.0634501	0.0299813	2.11632	0.0343172	0.385683	1.06551	1.00477	1.13008
DBP	T2D	0.0629397	0.0296994	2.11922	0.0340717	0.425289	1.06496	1.00476	1.12883
CHO	T2D	-0.0499183	0.0294196	-1.69677	0.0897406	0.493848	0.951307	0.89827	1.00808
ALT	T2D	0.0498535	0.0298448	1.67042	0.0948354	0.548905	1.05112	0.991396	1.11444
ALP	T2D	0.0413014	0.0298004	1.38594	0.165767	0.647996	1.04217	0.983055	1.10488
CAL	T2D	0.0387991	0.0297332	1.30491	0.191925	0.687731	1.03956	0.980681	1.10192
CREA	T2D	0.0351873	0.0298255	1.17977	0.238091	0.731278	1.03581	0.976996	1.09817
LDL	T2D	0.0290158	0.0298991	0.97046	0.331817	0.826441	1.02944	0.970885	1.09162
PHOS	T2D	-0.0300786	0.0295628	-1.01745	0.308941	0.83877	0.970369	0.916092	1.02866
TBIL	T2D	0.0273698	0.0297755	0.919206	0.357988	0.843026	1.02775	0.969385	1.08941
TRIG	T2D	-0.0246813	0.0300447	-0.821486	0.411369	0.904591	0.975621	0.919754	1.03472
TPROT	T2D	0.0237934	0.0298427	0.797294	0.42528	0.911613	1.02408	0.965907	1.08578
SHBG	T2D	0.0204654	0.0296694	0.689782	0.490331	0.912363	1.02068	0.963016	1.0818
IGF1	T2D	-0.0157909	0.0296739	-0.532147	0.594624	0.915839	0.984333	0.928747	1.04332
URA	T2D	-0.00490255	0.0296774	-0.165195	0.868791	0.970714	0.995109	0.93885	1.05468
APOB	T2D	-0.012296	0.0297305	-0.413582	0.67918	0.971485	0.987779	0.932318	1.04758
ALB	T2D	-0.00724509	0.029838	-0.242814	0.808149	0.972171	0.992781	0.936374	1.05256
APOA	T2D	-0.00628182	0.0298356	-0.210547	0.83324	0.972798	0.993738	0.937291	1.05359
HDL	T2D	0.00740397	0.0297948	0.248498	0.803749	0.973156	1.00743	0.950316	1.06806
VITD	T2D	0.0049982	0.0298531	0.167426	0.867034	0.973582	1.00501	0.947954	1.06565
URT	T2D	-0.00820506	0.0300882	-0.272701	0.785083	0.975172	0.991829	0.935029	1.05208
AST	T2D	0.0125068	0.0297108	0.420952	0.67379	0.976372	1.01259	0.955301	1.0733
BMI	OBS	0.241328	0.0279665	8.62917	6.18e-18	2.6574e-16	1.27294	1.20511	1.34475
LDL	OBS	-0.104586	0.0269929	-3.87456	0.000106817	0.00229657	0.900698	0.854535	0.949923
CHO	OBS	-0.104548	0.0272283	-3.83969	0.000123189	0.00264857	0.900731	0.854122	0.950338
APOB	OBS	-0.101212	0.0268283	-3.7726	0.000161552	0.00347337	0.903741	0.857756	0.952892
CRP	OBS	0.0900195	0.0280145	3.21332	0.0013121	0.0188068	1.0942	1.0358	1.15603
URT	OBS	0.0861891	0.0278753	3.09195	0.00198845	0.0285011	1.09001	1.03209	1.15126
GLUC	OBS	-0.0597544	0.0277119	-2.15627	0.0310625	0.208272	0.941996	0.892198	0.994583
ALB	OBS	-0.0564169	0.0277379	-2.03393	0.0419589	0.257747	0.945145	0.895117	0.997938
APOA	OBS	0.0509336	0.0278688	1.82762	0.0676066	0.372494	1.05225	0.99632	1.11134
ALP	OBS	-0.0505939	0.0276427	-1.83028	0.0672079	0.38449	0.950665	0.900517	1.00358
HDL	OBS	0.0474124	0.0278832	1.70039	0.0890567	0.425493	1.04855	0.992823	1.1075
PHOS	OBS	0.0459174	0.0277902	1.65229	0.0984761	0.441405	1.04699	0.991518	1.10564
TBIL	OBS	0.0347966	0.0277914	1.25206	0.210546	0.510102	1.03541	0.980434	1.09329
GGT	OBS	0.0292066	0.027867	1.04807	0.294605	0.575819	1.02964	0.974966	1.08751
SHBG	OBS	0.0262203	0.0278278	0.942237	0.346071	0.647003	1.02657	0.97201	1.08404
SBP	OBS	-0.0261526	0.0278351	-0.939556	0.347445	0.649571	0.974186	0.922485	1.02884
AST	OBS	-0.0256563	0.0277559	-0.924357	0.3553	0.664257	0.97467	0.923063	1.02917
ALT	OBS	0.0244867	0.0278266	0.879975	0.378873	0.708328	1.02479	0.970391	1.08224
TRIG	OBS	-0.0232183	0.0276749	-0.838968	0.401488	0.750607	0.977049	0.925455	1.03151
CAL	OBS	-0.020335	0.0277464	-0.73289	0.463626	0.830663	0.97987	0.927976	1.03461
IGF1	OBS	0.0172815	0.027807	0.621482	0.534283	0.883622	1.01743	0.96346	1.07442
CREA	OBS	0.0114856	0.0277813	0.413431	0.679291	0.913468	1.01155	0.95794	1.06816
TPROT	OBS	-0.0117576	0.0277407	-0.423839	0.671683	0.916806	0.988311	0.936011	1.04354
DBP	OBS	-0.00738438	0.0276979	-0.266604	0.789774	0.918803	0.992643	0.940238	1.04808
VITD	OBS	-0.00469372	0.0276909	-0.169504	0.8654	0.919475	0.995317	0.942717	1.05081
URA	OBS	0.00878861	0.0276601	0.317735	0.750686	0.922036	1.00883	0.9556	1.06504
HBA1C	OBS	-0.000928134	0.0278876	-0.0332812	0.97345	0.97345	0.999072	0.945938	1.05522
SBP	ISC	0.112015	0.0261024	4.29137	1.77572e-05	0.00025452	1.11853	1.06278	1.17729
APOB	ISC	0.0866701	0.0270962	3.19861	0.00138092	0.0197932	1.09054	1.03455	1.1505
LDL	ISC	0.078642	0.0259951	3.02527	0.00248415	0.0356061	1.08182	1.02811	1.1384
DBP	ISC	0.078369	0.0268342	2.92049	0.00349476	0.0500915	1.08152	1.02644	1.1403
CHO	ISC	0.0668998	0.0265427	2.52046	0.0117201	0.100793	1.06919	1.01524	1.12657
PHOS	ISC	0.0639669	0.0261708	2.44421	0.0145168	0.124844	1.06606	1.01279	1.12221
BMI	ISC	0.0571986	0.0259861	2.20112	0.0277274	0.198713	1.05887	1.0063	1.11422
CREA	ISC	0.0529974	0.0261386	2.02755	0.0426058	0.261721	1.05443	1.00177	1.10987
GLUC	ISC	0.0494195	0.0262992	1.87912	0.0602274	0.276658	1.05066	0.997905	1.10628
HBA1C	ISC	0.0443031	0.0261552	1.69385	0.0902933	0.348698	1.0453	0.993082	1.10031
HDL	ISC	-0.0396906	0.0260318	-1.5247	0.127334	0.365024	0.961087	0.913293	1.01141
APOA	ISC	-0.0365298	0.0260874	-1.40028	0.161428	0.41155	0.964129	0.916064	1.0147
AST	ISC	-0.0345697	0.0261149	-1.32375	0.185585	0.443341	0.966021	0.917808	1.01675
ALT	ISC	-0.0333198	0.0261026	-1.27649	0.201782	0.482034	0.967229	0.918975	1.01799
TRIG	ISC	0.020109	0.0260481	0.771996	0.440117	0.77493	1.02031	0.969534	1.07377
ALB	ISC	0.0200625	0.0262812	0.763381	0.445236	0.782938	1.02027	0.96899	1.07414
CRP	ISC	0.0174702	0.0262153	0.666411	0.505149	0.804496	1.01762	0.966696	1.07133
IGF1	ISC	-0.0172647	0.025951	-0.66528	0.505871	0.805647	0.982884	0.934129	1.03416
CAL	ISC	0.0143201	0.0261388	0.547849	0.583796	0.865628	1.01442	0.963804	1.0678
GGT	ISC	0.0131521	0.0261096	0.503728	0.614452	0.891885	1.01324	0.962674	1.06643
URA	ISC	0.0118771	0.0260637	0.455693	0.648611	0.899686	1.01195	0.96153	1.06497
TPROT	ISC	-0.00698056	0.0259503	-0.268998	0.787931	0.910087	0.993044	0.94382	1.04489
SHBG	ISC	0.00951954	0.0261136	0.364543	0.715453	0.910747	1.00956	0.959238	1.06264
VITD	ISC	-0.00942123	0.0261826	-0.359828	0.718976	0.911677	0.990623	0.941066	1.04279
TBIL	ISC	-0.00598169	0.0261524	-0.228724	0.819083	0.917596	0.994036	0.944288	1.04624
ALP	ISC	-0.00406809	0.0262598	-0.154917	0.876887	0.937465	0.99594	0.945978	1.04855
URT	ISC	0.00272944	0.0260484	0.104784	0.916547	0.94625	1.00273	0.95283	1.05527
SBP	HYP	0.151691	0.0164476	9.22268	2.89778e-20	6.23024e-19	1.1638	1.12691	1.20197
DBP	HYP	0.105232	0.0163492	6.43652	1.22247e-10	2.6283e-09	1.11097	1.07596	1.14717
BMI	HYP	0.0608149	0.0163252	3.72522	0.000195148	0.00419568	1.0627	1.02925	1.09727
ALT	HYP	0.0382147	0.0163531	2.33684	0.0194475	0.20906	1.03895	1.00619	1.0728
ALB	HYP	0.0330413	0.0163103	2.0258	0.0427855	0.335084	1.03359	1.00108	1.06718
GGT	HYP	0.0261067	0.0163957	1.59229	0.11132	0.53186	1.02645	0.994003	1.05999
APOB	HYP	0.0221835	0.0164178	1.35118	0.176636	0.635626	1.02243	0.990062	1.05588
GLUC	HYP	0.0221661	0.0163441	1.35621	0.175031	0.649734	1.02241	0.990184	1.0557
SHBG	HYP	0.0208796	0.0164169	1.27184	0.203431	0.654079	1.0211	0.988778	1.0545
AST	HYP	-0.0223074	0.0162896	-1.36943	0.170866	0.673897	0.97794	0.94721	1.00967
CRP	HYP	0.0195135	0.0164242	1.18809	0.234797	0.721162	1.01971	0.987406	1.05307
HBA1C	HYP	0.0194251	0.0163771	1.18612	0.235576	0.723556	1.01961	0.987411	1.05288
URT	HYP	0.0194289	0.0164119	1.18383	0.236481	0.726334	1.01962	0.987423	1.05304
TRIG	HYP	0.0176135	0.0164367	1.0716	0.2839	0.759201	1.01777	0.985495	1.05109
CAL	HYP	0.0113221	0.0163626	0.691949	0.48897	0.876071	1.01139	0.979464	1.04435
TBIL	HYP	0.0125328	0.0163316	0.767394	0.442847	0.886916	1.01261	0.980708	1.04555
APOA	HYP	0.00741391	0.0163715	0.452855	0.650653	0.888251	1.00744	0.975689	1.04036
LDL	HYP	0.00561932	0.0163555	0.343574	0.731167	0.891715	1.00564	0.973912	1.0384
CHO	HYP	-0.00796736	0.0163583	-0.487054	0.62622	0.893292	0.992064	0.960742	1.02437
CREA	HYP	-0.00366352	0.0163579	-0.223961	0.822788	0.924602	0.996343	0.964909	1.02881
HDL	HYP	0.00332101	0.0163363	0.20329	0.838909	0.927152	1.00333	0.971757	1.03603
PHOS	HYP	-0.00245775	0.0163732	-0.150108	0.880679	0.941893	0.997545	0.966039	1.03008
ALP	HYP	0.00267105	0.0163539	0.163328	0.87026	0.942609	1.00267	0.971045	1.03534
TPROT	HYP	-0.000944678	0.0163022	-0.0579479	0.95379	0.95379	0.999056	0.967637	1.03149
IGF1	HYP	-0.000634834	0.0163366	-0.0388597	0.969002	0.969002	0.999365	0.967873	1.03188
URA	HYP	0.000160852	0.01635	0.00983806	0.99215	0.99215	1.00016	0.968626	1.03274
VITD	HYP	1.01529e-05	0.0163348	0.000621553	0.999504	0.999504	1.00001	0.968497	1.03254
SBP	ANG	0.128025	0.0362253	3.53413	0.000409112	0.00879591	1.13658	1.05873	1.22028
DBP	ANG	0.111201	0.036022	3.08702	0.00202173	0.0430957	1.11762	1.04149	1.19946
APOB	ANG	0.0885669	0.0375722	2.35725	0.018411	0.158335	1.09261	1.0159	1.17713
LDL	ANG	0.0817388	0.0372167	2.19629	0.0280709	0.24141	1.08517	1.00951	1.16809
BMI	ANG	0.0772303	0.0360928	2.13977	0.0323736	0.278413	1.08029	1.00654	1.15953
GLUC	ANG	0.0771911	0.0365029	2.11466	0.0344591	0.296348	1.08025	1.00573	1.16045
CREA	ANG	0.0753279	0.0362682	2.07697	0.0378044	0.325118	1.07824	1.00426	1.1577
PHOS	ANG	0.0712641	0.0362595	1.96539	0.0493692	0.360908	1.07386	1.00026	1.15304
GGT	ANG	0.0646841	0.0364095	1.77657	0.0756384	0.417268	1.06682	0.993447	1.14586
APOA	ANG	-0.066415	0.0360576	-1.84191	0.0654881	0.421229	0.935742	0.871885	1.00426
HDL	ANG	-0.0641004	0.0360254	-1.77931	0.0751884	0.431289	0.937911	0.874004	1.00658
CHO	ANG	0.0624367	0.0367116	1.70073	0.0889929	0.478337	1.06443	0.991038	1.14444
VITD	ANG	0.0482431	0.0362874	1.32947	0.183692	0.718069	1.04943	0.977492	1.12693
AST	ANG	-0.0474141	0.0362609	-1.30758	0.191015	0.746695	0.953692	0.888246	1.02393
SHBG	ANG	-0.0434055	0.0359549	-1.20722	0.227348	0.814663	0.957523	0.892407	1.02749
CRP	ANG	0.0431093	0.0364649	1.18222	0.23712	0.84968	1.04405	0.972126	1.12151
ALB	ANG	0.0357846	0.0361356	0.990286	0.322034	0.934211	1.03643	0.965577	1.11252
HBA1C	ANG	0.0368908	0.0362907	1.01654	0.309373	0.935206	1.03758	0.966367	1.11411
TRIG	ANG	-0.0203507	0.0363152	-0.560391	0.575213	0.936873	0.979855	0.912525	1.05214
ALP	ANG	-0.0341887	0.0360401	-0.94863	0.342809	0.938549	0.966389	0.900481	1.03713
TBIL	ANG	0.0215866	0.0364435	0.59233	0.553629	0.938659	1.02182	0.951269	1.09736
URT	ANG	-0.0341394	0.0364194	-0.937396	0.348555	0.939224	0.966437	0.899682	1.03777
URA	ANG	0.013149	0.0364743	0.360501	0.718472	0.944535	1.01324	0.943331	1.08834
IGF1	ANG	0.0239801	0.0360825	0.664591	0.506312	0.944824	1.02427	0.954326	1.09933
TPROT	ANG	-0.00483979	0.0361035	-0.134053	0.893361	0.947012	0.995172	0.927147	1.06811
ALT	ANG	-0.00236129	0.0361748	-0.0652745	0.947955	0.948174	0.997641	0.929342	1.07094
CAL	ANG	-0.00187743	0.0361186	-0.0519797	0.958545	0.958545	0.998124	0.929865	1.0713
LDL	MYO	0.176418	0.0402887	4.37886	1.19304e-05	0.000171003	1.19294	1.10321	1.29197
APOB	MYO	0.177539	0.0409988	4.33035	1.48869e-05	0.000213379	1.19428	1.10316	1.29553
CHO	MYO	0.1579	0.0394295	4.0046	6.21218e-05	0.00066781	1.17105	1.08459	1.26589
PHOS	MYO	0.10948	0.0376961	2.90427	0.00368114	0.0359602	1.1157	1.03633	1.20137
ALB	MYO	0.100592	0.0378444	2.65804	0.00785961	0.0482805	1.10583	1.02681	1.19103
SBP	MYO	0.0990418	0.0376435	2.63105	0.00851225	0.0522895	1.10411	1.02562	1.18871
BMI	MYO	0.0987006	0.0376603	2.62081	0.00877207	0.0538856	1.10374	1.02523	1.18833
TRIG	MYO	0.0911165	0.0378959	2.40439	0.0161996	0.0870729	1.0954	1.01686	1.17972
CREA	MYO	0.0673349	0.0376334	1.78923	0.0735774	0.225988	1.06965	0.993603	1.15156
GGT	MYO	0.0671955	0.0376902	1.78284	0.0746127	0.229168	1.0695	0.993448	1.15163
ALT	MYO	-0.0598947	0.0375557	-1.59482	0.110752	0.317489	0.941864	0.874992	1.01378
HDL	MYO	0.0500275	0.0374952	1.33424	0.182126	0.435079	1.0513	0.976839	1.13151
APOA	MYO	-0.0512076	0.0375818	-1.36256	0.17302	0.437639	0.950081	0.882655	1.02276
DBP	MYO	-0.0499674	0.0376529	-1.32705	0.184491	0.446163	0.95126	0.883584	1.02412
CRP	MYO	0.0443102	0.0378744	1.16993	0.24203	0.47306	1.04531	0.970618	1.12598
TPROT	MYO	-0.036615	0.0377631	-0.969597	0.332248	0.595277	0.964047	0.895261	1.03811
CAL	MYO	0.0359027	0.0375868	0.955194	0.33948	0.608234	1.03655	0.962889	1.11575
GLUC	MYO	0.0357982	0.0381284	0.938885	0.34779	0.623123	1.03645	0.961865	1.11694
AST	MYO	-0.0309337	0.0377718	-0.818962	0.412808	0.715977	0.96954	0.900336	1.04403
ALP	MYO	0.0297898	0.0375282	0.793797	0.427314	0.73498	1.03024	0.957202	1.10891
TBIL	MYO	-0.0197428	0.0378848	-0.521127	0.602278	0.792236	0.980451	0.910099	1.05583
URT	MYO	0.0120938	0.0379304	0.31884	0.749848	0.842021	1.01217	0.93961	1.09025
SHBG	MYO	-0.0111728	0.0372648	-0.29982	0.764314	0.842705	0.988889	0.91929	1.06389
URA	MYO	0.0108509	0.0379097	0.286229	0.774703	0.854022	1.01091	0.938533	1.08891
VITD	MYO	0.00521705	0.0377396	0.138238	0.890052	0.911244	1.00523	0.933656	1.08254
IGF1	MYO	-0.00488223	0.0374479	-0.130374	0.896271	0.91761	0.99513	0.92468	1.0709
HBA1C	MYO	0.00465861	0.0378825	0.122975	0.902127	0.923544	1.00467	0.932801	1.08215
SBP	CAD	0.136273	0.0298871	4.55959	5.12545e-06	7.34647e-05	1.14599	1.08084	1.21519
APOB	CAD	0.138652	0.0317183	4.37136	1.23478e-05	0.000176985	1.14872	1.08011	1.22313
LDL	CAD	0.132533	0.0312248	4.24448	2.19105e-05	0.00031405	1.14172	1.07442	1.21433
CHO	CAD	0.122609	0.0307606	3.9859	6.72257e-05	0.000963569	1.13044	1.06467	1.20112
BMI	CAD	0.111439	0.0297015	3.75196	0.000175454	0.00251485	1.11789	1.0547	1.18494
PHOS	CAD	0.0706421	0.0295476	2.39079	0.0168121	0.103274	1.0732	1.01285	1.13723
DBP	CAD	0.0679672	0.0298554	2.27655	0.0228133	0.135233	1.07033	1.00955	1.13489
TRIG	CAD	0.0518618	0.0300448	1.72615	0.0843206	0.284017	1.05323	0.99293	1.11704
GLUC	CAD	0.0509621	0.0299733	1.70025	0.0890846	0.294664	1.05228	0.992284	1.11601
GGT	CAD	0.0463391	0.0299095	1.54931	0.121308	0.329087	1.04743	0.987858	1.11075
HDL	CAD	0.0393589	0.0299835	1.31269	0.189288	0.38759	1.04014	0.980803	1.10314
HBA1C	CAD	-0.0371024	0.02956	-1.25516	0.209422	0.394607	0.963577	0.909357	1.02108
SHBG	CAD	-0.0382519	0.0297191	-1.28712	0.198054	0.397578	0.96247	0.908028	1.02023
TBIL	CAD	0.033814	0.0296745	1.1395	0.254496	0.420897	1.03439	0.975856	1.09625
CREA	CAD	0.0317629	0.0298557	1.06388	0.287383	0.446668	1.03227	0.973603	1.09449
TPROT	CAD	0.0314278	0.029847	1.05296	0.292358	0.465039	1.03193	0.973265	1.09407
CRP	CAD	-0.0295046	0.0298917	-0.987049	0.323619	0.479849	0.970926	0.915666	1.0295
APOA	CAD	0.0300877	0.0299403	1.00493	0.314933	0.480876	1.03054	0.971865	1.0929
URA	CAD	-0.0290981	0.0298385	-0.975187	0.329468	0.488521	0.971321	0.916136	1.02982
IGF1	CAD	-0.0279595	0.0295415	-0.946449	0.34392	0.50995	0.972428	0.917705	1.03038
VITD	CAD	0.0224248	0.0299015	0.749956	0.453281	0.573268	1.02268	0.964529	1.08449
ALB	CAD	0.0137282	0.0297405	0.4616	0.644368	0.74886	1.01382	0.956417	1.07468
ALP	CAD	-0.0104511	0.0296494	-0.352491	0.72447	0.841952	0.989603	0.933741	1.04883
AST	CAD	-0.00833954	0.0298776	-0.279123	0.78015	0.882802	0.991695	0.93528	1.0515
URT	CAD	-0.00654443	0.0297694	-0.219837	0.825998	0.887948	0.993477	0.937136	1.05314
CAL	CAD	-0.00377332	0.0298435	-0.126437	0.899386	0.96684	0.996234	0.939621	1.05624
ALT	CAD	0.00182412	0.0301015	0.0605991	0.951678	0.984807	1.00183	0.944435	1.06272
BMI	OART	0.111868	0.0242032	4.62205	3.79971e-06	5.44625e-05	1.11837	1.06658	1.17273
CRP	OART	0.0577475	0.0244443	2.36241	0.0181566	0.212484	1.05945	1.00993	1.11149
ALT	OART	0.0576158	0.024264	2.37454	0.017571	0.251851	1.05931	1.01012	1.11091
ALB	OART	-0.0432089	0.0241534	-1.78894	0.0736244	0.450385	0.957711	0.913423	1.00414
SBP	OART	-0.0367109	0.0241576	-1.51964	0.128601	0.482787	0.963955	0.919401	1.01073
SHBG	OART	-0.0420131	0.0241795	-1.73755	0.0822899	0.483594	0.958857	0.914467	1.00539
VITD	OART	0.0328096	0.0241924	1.35619	0.175038	0.501776	1.03335	0.985443	1.08348
GGT	OART	-0.0398714	0.0240982	-1.65453	0.0980189	0.507269	0.960913	0.916594	1.00741
TPROT	OART	0.039012	0.0243531	1.60193	0.109171	0.508465	1.03978	0.991361	1.09067
HBA1C	OART	0.0302738	0.02428	1.24686	0.212448	0.570955	1.03074	0.982861	1.08101
PHOS	OART	-0.0290075	0.0242693	-1.19523	0.231995	0.591774	0.971409	0.926278	1.01873
TBIL	OART	-0.0261583	0.0241637	-1.08254	0.279011	0.603704	0.974181	0.929094	1.02141
CAL	OART	0.0274784	0.024271	1.13215	0.25757	0.605086	1.02786	0.98012	1.07796
HDL	OART	-0.0214206	0.0242303	-0.884042	0.376674	0.736226	0.978807	0.933421	1.02643
CHO	OART	-0.0185274	0.0242159	-0.765094	0.444216	0.795886	0.981643	0.936134	1.02936
APOA	OART	-0.0176679	0.0243618	-0.725229	0.468312	0.839059	0.982487	0.936675	1.03054
URT	OART	-0.0173818	0.0241102	-0.72093	0.470953	0.84379	0.982768	0.937578	1.03052
ALP	OART	0.0140754	0.0243475	0.578104	0.563194	0.853896	1.01417	0.966871	1.0637
TRIG	OART	-0.0119791	0.0240837	-0.497396	0.61891	0.854422	0.988092	0.94254	1.03586
LDL	OART	0.0153131	0.0242449	0.631601	0.527648	0.856713	1.01543	0.968313	1.06486
DBP	OART	-0.0100236	0.0241043	-0.415843	0.677525	0.861882	0.990026	0.944615	1.03823
URA	OART	-0.0139763	0.0241304	-0.579196	0.562457	0.862409	0.986121	0.940787	1.03413
GLUC	OART	0.00803965	0.0242233	0.331898	0.739966	0.862542	1.00807	0.961328	1.05709
AST	OART	-0.0132052	0.024173	-0.54628	0.584873	0.864296	0.986882	0.941198	1.03475
APOB	OART	-0.0123604	0.0243535	-0.507539	0.611777	0.871557	0.987716	0.941688	1.03602
CREA	OART	-0.00312578	0.024257	-0.128861	0.897467	0.918836	0.996879	0.950587	1.04542
IGF1	OART	0.0010524	0.0241777	0.0435276	0.965281	0.965281	1.00105	0.954716	1.04963
BMI	RA	0.192577	0.0554075	3.47565	0.000509623	0.0073046	1.21237	1.08771	1.35162
AST	RA	0.106517	0.0554248	1.92182	0.054628	0.293625	1.1124	0.997904	1.2401
TRIG	RA	0.0961763	0.0572284	1.68057	0.0928463	0.332699	1.10095	0.985414	1.23327
CHO	RA	0.0878019	0.055076	1.5942	0.110892	0.366798	1.09177	0.979746	1.21584
URA	RA	0.0843848	0.0548724	1.53784	0.124088	0.410446	1.08805	0.977066	1.21158
SHBG	RA	-0.0774385	0.0549192	-1.41004	0.158527	0.456299	0.925484	0.831159	1.03084
APOA	RA	0.0721376	0.0553342	1.30367	0.192346	0.459492	1.0748	0.964353	1.19797
HBA1C	RA	-0.0654332	0.055385	-1.18142	0.237434	0.464075	0.936662	0.840327	1.04412
ALB	RA	0.0522097	0.0571093	0.914206	0.360609	0.674182	1.0536	0.943963	1.18092
DBP	RA	0.0503681	0.0554044	0.9091	0.363297	0.679208	1.05166	0.943591	1.17251
HDL	RA	0.0492222	0.0552934	0.890202	0.373358	0.694671	1.05045	0.942626	1.1708
APOB	RA	0.0487989	0.055509	0.879116	0.379338	0.703371	1.05001	0.94175	1.17069
CRP	RA	0.0456004	0.0559948	0.814369	0.415434	0.744319	1.04666	0.938079	1.16836
SBP	RA	-0.0346855	0.0551681	-0.628723	0.52953	0.75944	0.965909	0.866892	1.0762
IGF1	RA	0.0403049	0.0555399	0.725693	0.468027	0.759572	1.04113	0.933722	1.16086
LDL	RA	0.037366	0.0553748	0.674783	0.499814	0.759854	1.03807	0.931306	1.15711
TPROT	RA	0.0452805	0.0567048	0.79853	0.424563	0.760675	1.04632	0.937788	1.17129
ALT	RA	0.0346912	0.0554203	0.625966	0.531337	0.767981	1.0353	0.928874	1.1543
PHOS	RA	0.0392292	0.0553595	0.708626	0.478556	0.769115	1.04001	0.932959	1.15909
GLUC	RA	0.0377259	0.0553934	0.681053	0.495838	0.772234	1.03845	0.931642	1.15761
CAL	RA	-0.0292158	0.0550742	-0.530481	0.595779	0.800577	0.971207	0.871796	1.0819
CREA	RA	-0.0290176	0.0552313	-0.525383	0.599317	0.805332	0.971399	0.87183	1.08259
VITD	RA	0.0265723	0.0557922	0.476272	0.63388	0.851325	1.02693	0.920561	1.14564
URT	RA	-0.0230481	0.0552834	-0.416908	0.676746	0.853151	0.977216	0.877051	1.08934
GGT	RA	0.0180851	0.055673	0.324844	0.745299	0.855622	1.01825	0.913181	1.13591
TBIL	RA	-0.0101091	0.0555796	-0.181885	0.855673	0.892123	0.989942	0.887361	1.10346
ALP	RA	0.00212697	0.0554066	0.0383883	0.969378	0.990192	1.00213	0.898991	1.1171
BMI	COPD	0.0831921	0.0297326	2.79801	0.00514192	0.0368505	1.08675	1.02526	1.152
TPROT	COPD	-0.0801829	0.0296638	-2.70305	0.00687055	0.0492389	0.922948	0.870805	0.978192
ALB	COPD	-0.0783512	0.0295885	-2.64803	0.0080962	0.0563275	0.92464	0.872531	0.979841
HDL	COPD	-0.0724369	0.0296689	-2.44151	0.0146259	0.0777072	0.930124	0.877588	0.985833
HBA1C	COPD	0.0594537	0.0298959	1.98869	0.0467351	0.167467	1.06126	1.00089	1.12534
IGF1	COPD	-0.0577811	0.0295446	-1.95572	0.0504976	0.18095	0.943857	0.890722	1.0001
SHBG	COPD	0.0563383	0.0296283	1.9015	0.0572362	0.205096	1.05796	0.998318	1.12127
AST	COPD	-0.0562172	0.0299904	-1.87451	0.0608604	0.218083	0.945334	0.891348	1.00255
SBP	COPD	0.0497437	0.0297926	1.66967	0.0949852	0.340364	1.051	0.991404	1.11423
CAL	COPD	0.04892	0.029706	1.64681	0.099598	0.356893	1.05014	0.990715	1.11307
DBP	COPD	0.0470463	0.0296426	1.58712	0.112487	0.367712	1.04817	0.989036	1.11091
TRIG	COPD	0.0441326	0.0300646	1.46793	0.142124	0.369388	1.04512	0.985243	1.10848
APOA	COPD	-0.0439044	0.0296532	-1.48059	0.138715	0.371975	0.957045	0.902995	1.01431
VITD	COPD	0.0432647	0.0298365	1.45006	0.147042	0.374673	1.04421	0.984973	1.10719
PHOS	COPD	0.0409953	0.0297651	1.3773	0.168421	0.426006	1.04185	0.982847	1.10449
APOB	COPD	-0.0346689	0.0295377	-1.17372	0.240508	0.544308	0.965925	0.911845	1.02379
CHO	COPD	0.0346193	0.0298804	1.15859	0.246621	0.558143	1.03523	0.976341	1.09767
CRP	COPD	-0.0332065	0.0293329	-1.13206	0.25761	0.567647	0.967339	0.913697	1.02505
CREA	COPD	0.0324012	0.0299272	1.08267	0.278957	0.577727	1.03293	0.974144	1.09541
LDL	COPD	-0.0280218	0.0294999	-0.949894	0.342166	0.698358	0.972367	0.918067	1.03063
GLUC	COPD	0.0227488	0.0301074	0.75559	0.449895	0.716499	1.02301	0.964416	1.08523
URT	COPD	0.0211968	0.0300013	0.706527	0.47986	0.736928	1.02142	0.963106	1.08331
ALP	COPD	0.00864636	0.0298049	0.290098	0.771741	0.856222	1.00868	0.951459	1.06938
GGT	COPD	0.00684087	0.0299739	0.228228	0.819469	0.865308	1.00686	0.949464	1.06785
URA	COPD	-0.00115845	0.0299423	-0.0386893	0.969138	0.977217	0.998842	0.941806	1.05911
TBIL	COPD	-0.000854275	0.0297673	-0.0286984	0.977105	0.977613	0.999146	0.942506	1.05917
ALT	COPD	-0.000542534	0.029715	-0.0182579	0.985433	0.985433	0.999458	0.942891	1.05938
AST	ANX	-0.101929	0.0337087	-3.0238	0.00249619	0.0296935	0.903094	0.845329	0.964752
BMI	ANX	0.0689282	0.0337901	2.03989	0.0413612	0.296422	1.07136	1.00271	1.14473
CAL	ANX	0.0668444	0.0336527	1.9863	0.0469996	0.33683	1.06913	1.00086	1.142
ALT	ANX	-0.0482004	0.0337544	-1.42797	0.153299	0.511584	0.952943	0.891913	1.0181
URT	ANX	-0.0574923	0.0336882	-1.7066	0.0878962	0.514439	0.944129	0.883792	1.00857
APOA	ANX	0.0504194	0.0337874	1.49226	0.135632	0.522126	1.05171	0.984362	1.12377
HDL	ANX	0.0464384	0.0337132	1.37745	0.168372	0.523679	1.04753	0.980548	1.11909
HBA1C	ANX	0.0472283	0.0338505	1.3952	0.162955	0.535982	1.04836	0.981086	1.12031
CHO	ANX	-0.0376567	0.0334848	-1.12459	0.260762	0.622931	0.963043	0.902248	1.02881
CREA	ANX	-0.0374646	0.0337899	-1.10875	0.267539	0.63912	0.963229	0.901484	1.02917
TPROT	ANX	0.0340152	0.0337941	1.00654	0.314154	0.710981	1.0346	0.968309	1.10547
ALB	ANX	-0.034298	0.0338637	-1.01283	0.311143	0.723517	0.966283	0.904222	1.03259
LDL	ANX	-0.0342591	0.0334255	-1.02494	0.305392	0.729549	0.966321	0.905527	1.03232
DBP	ANX	0.0317122	0.0336879	0.941355	0.346523	0.784236	1.03222	0.966287	1.10271
CRP	ANX	0.0289877	0.0339384	0.854126	0.393035	0.889501	1.02941	0.963241	1.10031
GGT	ANX	-0.0247647	0.0333892	-0.741698	0.458271	0.90836	0.975539	0.914346	1.04223
APOB	ANX	0.026627	0.0338788	0.785949	0.431897	0.908719	1.02698	0.961089	1.09759
PHOS	ANX	-0.021093	0.0338362	-0.623384	0.533033	0.955017	0.979128	0.916345	1.04632
SHBG	ANX	0.0107212	0.0336458	0.318647	0.749994	0.972831	1.01078	0.946306	1.07973
URA	ANX	-0.00340295	0.0337311	-0.100884	0.919642	0.973596	0.996603	0.932698	1.06457
GLUC	ANX	0.00798259	0.0336405	0.237291	0.812431	0.974542	1.00801	0.94375	1.07679
VITD	ANX	0.00299647	0.0337986	0.0886567	0.929355	0.974689	1.003	0.938699	1.07169
TBIL	ANX	-0.00970885	0.0338215	-0.287061	0.774065	0.975434	0.990338	0.926782	1.05818
SBP	ANX	-0.012118	0.0337024	-0.359559	0.719177	0.975599	0.987955	0.924883	1.05552
IGF1	ANX	-0.0154028	0.033799	-0.455718	0.648593	0.978127	0.984715	0.921487	1.05204
TRIG	ANX	-0.0153378	0.0335883	-0.456643	0.647928	0.97878	0.984779	0.922038	1.0518
ALP	ANX	-0.0028217	0.0338503	-0.0833584	0.933567	0.979106	0.997182	0.933184	1.06561
CRP	FLU	0.113011	0.0487366	2.31882	0.020405	0.292472	1.11964	1.01783	1.23211
TRIG	FLU	0.0913025	0.0484377	1.88495	0.0594369	0.511158	1.0956	0.996161	1.20445
ALT	FLU	0.0481884	0.0485406	0.992743	0.320835	0.755008	1.04937	0.954179	1.15418
HBA1C	FLU	0.0547142	0.0482468	1.13405	0.256774	0.759622	1.05624	0.960918	1.16099
ALB	FLU	-0.0784933	0.0481392	-1.63055	0.102985	0.764379	0.924508	0.841258	1.01598
BMI	FLU	-0.039917	0.0482065	-0.828042	0.407647	0.767824	0.960869	0.874232	1.05608
HDL	FLU	0.0804537	0.0480945	1.67283	0.0943616	0.769014	1.08378	0.98632	1.19097
IGF1	FLU	-0.0718608	0.0480779	-1.49468	0.134999	0.770358	0.93066	0.84703	1.02271
APOA	FLU	0.0437013	0.0486604	0.898089	0.369138	0.772285	1.04467	0.949672	1.14927
URT	FLU	-0.0530888	0.0480224	-1.1055	0.268943	0.773613	0.948296	0.863073	1.04186
AST	FLU	-0.0378817	0.0482879	-0.784497	0.432749	0.784158	0.962827	0.875865	1.0584
TBIL	FLU	-0.0757333	0.0488962	-1.54886	0.121415	0.784192	0.927063	0.841981	1.01992
GLUC	FLU	0.0353991	0.0488642	0.724438	0.468797	0.833612	1.03603	0.941501	1.14029
ALP	FLU	0.0323248	0.0482519	0.669918	0.50291	0.837197	1.03285	0.93969	1.13536
PHOS	FLU	-0.0347728	0.0482516	-0.720656	0.471121	0.840098	0.965825	0.878753	1.06173
TPROT	FLU	-0.0266792	0.0484138	-0.551065	0.581589	0.926235	0.973674	0.88553	1.0706
GGT	FLU	-0.0102212	0.0483163	-0.211547	0.83246	0.997079	0.989831	0.900535	1.08833
LDL	FLU	0.0139981	0.0483538	0.289494	0.772203	0.998069	1.0141	0.922326	1.11483
URA	FLU	0.0154918	0.0485086	0.319361	0.749453	0.998257	1.01561	0.924569	1.11824
APOB	FLU	0.00787074	0.0483441	0.162807	0.870671	0.998473	1.0079	0.916956	1.10831
SHBG	FLU	0.00932825	0.0483321	0.193003	0.846957	0.99852	1.00937	0.918172	1.10971
CHO	FLU	0.00404519	0.0482613	0.0838185	0.933201	0.998778	1.00405	0.914723	1.10529
CREA	FLU	0.00122802	0.0478535	0.0256621	0.979527	0.998807	1.00123	0.911699	1.09982
DBP	FLU	-0.0216082	0.048294	-0.447429	0.654565	0.999017	0.978624	0.890148	1.07568
SBP	FLU	0.00623793	0.0485336	0.128528	0.897731	0.999713	1.00626	0.914921	1.10665
VITD	FLU	0.00643539	0.0479775	0.134134	0.893297	0.99976	1.00646	0.916168	1.10575
CAL	FLU	0.0121619	0.0483741	0.251413	0.801495	0.99982	1.01224	0.921519	1.11395
SHBG	PROST	-0.126325	0.0493974	-2.55732	0.0105481	0.221511	0.881328	0.799946	0.970912
BMI	PROST	-0.11329	0.0491111	-2.30682	0.0210648	0.44236	0.892891	0.810875	0.98307
HBA1C	PROST	-0.114226	0.0498778	-2.29012	0.0220145	0.462303	0.892056	0.808907	0.983637
IGF1	PROST	-0.0556007	0.0487511	-1.1405	0.254077	0.641109	0.945917	0.859645	1.04073
SBP	PROST	0.0670438	0.0496061	1.35152	0.176528	0.64402	1.06934	0.970344	1.17869
ALB	PROST	0.0695452	0.049881	1.39422	0.163251	0.658973	1.07202	0.972354	1.18241
VITD	PROST	0.0662482	0.0502125	1.31936	0.18705	0.663436	1.06849	0.968357	1.17907
GGT	PROST	0.0668847	0.049291	1.35693	0.174802	0.663984	1.06917	0.970741	1.17771
HDL	PROST	-0.0707175	0.0483167	-1.46362	0.143297	0.665975	0.931725	0.84814	1.02508
CREA	PROST	0.0564468	0.0500042	1.12884	0.258965	0.667946	1.05807	0.959516	1.16737
LDL	PROST	0.0554436	0.0494494	1.12122	0.262195	0.677245	1.05701	0.959479	1.16477
APOB	PROST	-0.0809536	0.0478004	-1.69357	0.0903462	0.677547	0.922236	0.840505	1.01381
CHO	PROST	-0.0526994	0.0499419	-1.05522	0.291327	0.679763	0.948665	0.860154	1.04622
AST	PROST	-0.058041	0.0482326	-1.20336	0.228839	0.681249	0.943611	0.858985	1.03783
TRIG	PROST	0.0428983	0.0502736	0.853297	0.393495	0.78699	1.04383	0.945722	1.15178
APOA	PROST	0.0431773	0.0496061	0.870403	0.38408	0.800379	1.04412	0.947403	1.15082
ALP	PROST	-0.041362	0.0492564	-0.839728	0.401061	0.831581	0.959482	0.8712	1.05681
DBP	PROST	-0.0396249	0.0491979	-0.80542	0.420577	0.841155	0.96115	0.872808	1.05851
GLUC	PROST	-0.0368136	0.0505919	-0.72766	0.466822	0.859176	0.963856	0.872901	1.06443
URT	PROST	-0.014855	0.0498618	-0.297923	0.765762	0.869244	0.985255	0.893441	1.08636
CAL	PROST	0.0272771	0.0507557	0.537421	0.590977	0.870333	1.02765	0.930377	1.13525
PHOS	PROST	0.022966	0.0499916	0.459398	0.645948	0.8737	1.02323	0.927853	1.12877
URA	PROST	-0.0253865	0.0495485	-0.512355	0.608402	0.876342	0.974933	0.884719	1.07443
CRP	PROST	0.0348253	0.0502432	0.693135	0.488225	0.877118	1.03544	0.938242	1.14253
TPROT	PROST	0.0149542	0.0499465	0.299404	0.764632	0.877633	1.01507	0.920295	1.11939
ALT	PROST	-0.0261418	0.0498235	-0.524687	0.5998	0.878031	0.974197	0.883479	1.07409
TBIL	PROST	0.000756262	0.0495404	0.0152656	0.98782	0.98782	1.00076	0.907871	1.10254
TBIL	BREAST	0.0676715	0.032042	2.11196	0.0346895	0.354948	1.07001	1.00479	1.13928
DBP	BREAST	-0.063387	0.0320823	-1.97576	0.0481817	0.394392	0.93858	0.881368	0.999491
SBP	BREAST	-0.0461348	0.0320976	-1.43733	0.150625	0.632624	0.954913	0.896678	1.01691
TRIG	BREAST	-0.020116	0.0320611	-0.627429	0.530378	0.885323	0.980085	0.920819	1.04415
HBA1C	BREAST	-0.0302048	0.0322073	-0.937822	0.348336	0.886057	0.970247	0.910794	1.03336
GLUC	BREAST	0.026372	0.0320906	0.821797	0.411192	0.886878	1.02672	0.964188	1.09345
TPROT	BREAST	0.0291317	0.0322117	0.904383	0.365792	0.88744	1.02956	0.966617	1.09672
APOB	BREAST	0.0265971	0.0321539	0.827181	0.408134	0.88792	1.02695	0.964247	1.09379
LDL	BREAST	0.01992	0.0320684	0.621173	0.534486	0.888539	1.02012	0.958005	1.08634
CAL	BREAST	0.0265246	0.032124	0.825692	0.408979	0.888761	1.02688	0.964234	1.09364
SHBG	BREAST	-0.0176102	0.0319723	-0.550796	0.581774	0.890304	0.982544	0.923387	1.0467
PHOS	BREAST	0.0185404	0.0320443	0.578588	0.562867	0.892307	1.01871	0.956674	1.08473
ALB	BREAST	-0.03171	0.0322139	-0.984357	0.32494	0.896305	0.968788	0.909496	1.03192
ALP	BREAST	0.0291061	0.0321433	0.905512	0.365194	0.905579	1.02953	0.966674	1.09649
CHO	BREAST	-0.0351252	0.0321885	-1.09123	0.27517	0.907551	0.965485	0.90644	1.02835
APOA	BREAST	-0.0162202	0.032167	-0.50425	0.614086	0.921129	0.983911	0.924131	1.04834
CREA	BREAST	0.01613	0.0320627	0.503077	0.61491	0.922366	1.01626	0.954358	1.08218
URA	BREAST	-0.0159955	0.0319457	-0.50071	0.616575	0.924863	0.984132	0.924374	1.0477
IGF1	BREAST	-0.0150809	0.0323148	-0.466686	0.640724	0.942199	0.985032	0.924564	1.04943
AST	BREAST	0.0116962	0.032017	0.365313	0.714878	0.968544	1.01176	0.950223	1.0773
ALT	BREAST	0.0104608	0.0322176	0.324692	0.745414	0.978356	1.01052	0.948673	1.07639
VITD	BREAST	-0.000500636	0.0320908	-0.0156006	0.987553	0.990769	0.999499	0.938575	1.0644
CRP	BREAST	-0.00698497	0.0322805	-0.216383	0.828689	0.99094	0.993039	0.932186	1.05794
URT	BREAST	0.00409187	0.03216	0.127235	0.898755	0.991499	1.0041	0.942825	1.06951
GGT	BREAST	0.00178283	0.032255	0.0552731	0.955921	0.991565	1.00178	0.940483	1.06725
HDL	BREAST	-0.00863126	0.0322086	-0.26798	0.788714	0.991988	0.991406	0.930746	1.05601
BMI	BREAST	-0.00830227	0.0323585	-0.256572	0.797509	0.992795	0.991732	0.93084	1.05674

## Sheet: Table S2
PRS	Outcome	Estimate	SD	T-value	P-value	FDR	OR	LCI (95%)	UCI (95%)
BMI	T2D	0.200195	0.029999	6.67339	2.49964e-11	5.37423e-10	1.22164	1.15196	1.29572
HBA1C	T2D	0.145009	0.0301762	4.80541	1.54436e-06	3.32037e-05	1.15605	1.08972	1.22657
SBP	T2D	0.101757	0.0299104	3.40206	0.000668809	0.00958626	1.10711	1.04409	1.17398
DBP	T2D	0.0971835	0.0300283	3.2364	0.00121049	0.0173503	1.10206	1.03908	1.16888
URA	T2D	0.0901385	0.0299658	3.00804	0.00262938	0.0376877	1.09433	1.03191	1.16053
IGF1	T2D	0.0788408	0.0307131	2.56701	0.010258	0.0882184	1.08203	1.01884	1.14919
PHOS	T2D	0.0769053	0.0299957	2.56388	0.010351	0.0890187	1.07994	1.01834	1.14541
SHBG	T2D	-0.0727104	0.0296765	-2.4501	0.0142817	0.122822	0.92987	0.87734	0.985582
ALT	T2D	0.0591857	0.0299082	1.97891	0.0478262	0.411305	1.06097	1.00064	1.12512
GLUC	T2D	0.0480657	0.0299963	1.60239	0.10907	0.500051	1.04924	0.989389	1.11285
CRP	T2D	0.0491779	0.0298696	1.64642	0.0996766	0.503925	1.05041	0.990741	1.11382
TBIL	T2D	0.0440015	0.0295459	1.48926	0.136419	0.545244	1.04498	0.985994	1.10708
TRIG	T2D	-0.043595	0.0298781	-1.45909	0.144539	0.565017	0.957342	0.902841	1.01503
APOA	T2D	-0.0239942	0.0297429	-0.806722	0.419827	0.761051	0.976291	0.921014	1.03491
AST	T2D	-0.0253064	0.0299681	-0.844445	0.398421	0.762824	0.975011	0.919357	1.03396
APOB	T2D	0.0290332	0.029943	0.969617	0.332238	0.762836	1.02946	0.97101	1.09195
LDL	T2D	0.0222921	0.0298604	0.746544	0.455339	0.763332	1.02254	0.964623	1.08441
HDL	T2D	-0.0312833	0.0298089	-1.04946	0.293965	0.764682	0.969201	0.914216	1.02754
VITD	T2D	-0.0211675	0.029689	-0.712976	0.47586	0.782529	0.979055	0.923861	1.03789
TPROT	T2D	0.0168594	0.0299992	0.561996	0.574119	0.784599	1.017	0.958972	1.07865
GGT	T2D	0.0176241	0.0297574	0.59226	0.553676	0.793214	1.01778	0.960133	1.07893
URT	T2D	0.0175644	0.0298426	0.588566	0.556152	0.796279	1.01772	0.960102	1.07926
ALP	T2D	-0.0142477	0.029613	-0.48113	0.630424	0.847132	0.985853	0.930383	1.04491
CREA	T2D	0.00671319	0.0298184	0.225136	0.821873	0.930015	1.00674	0.949575	1.06732
ALB	T2D	0.00787341	0.0300647	0.261882	0.793413	0.930296	1.0079	0.95027	1.06913
CAL	T2D	0.00412147	0.0299749	0.137497	0.890638	0.981714	1.00413	0.946809	1.06487
CHO	T2D	0.0041445	0.0297879	0.139134	0.889344	0.983187	1.00415	0.947347	1.06469
BMI	OBS	0.348298	0.0282642	12.3229	6.81729e-35	2.93143e-33	1.41665	1.34044	1.4975
DBP	OBS	0.103019	0.0280352	3.67461	0.000238216	0.00512164	1.10851	1.04925	1.17115
CRP	OBS	0.0897147	0.0279172	3.2136	0.00131082	0.0187885	1.09386	1.03568	1.15546
CHO	OBS	-0.0788618	0.0277169	-2.84526	0.00443757	0.0505212	0.924168	0.875398	0.975874
SBP	OBS	0.075379	0.027783	2.71314	0.00666493	0.071648	1.07829	1.02116	1.13866
URT	OBS	0.074581	0.0281399	2.65036	0.00804058	0.0864363	1.07743	1.01983	1.13877
ALT	OBS	0.0715838	0.0278099	2.57404	0.0100518	0.108057	1.07421	1.01728	1.13445
APOB	OBS	-0.0647265	0.0276731	-2.33897	0.0193371	0.166299	0.937324	0.887995	0.989748
LDL	OBS	-0.0641254	0.0276846	-2.31629	0.0205426	0.176666	0.937887	0.888497	0.990352
URA	OBS	0.0539258	0.027922	1.9313	0.053446	0.328311	1.05541	0.999198	1.11478
GGT	OBS	0.0465006	0.0277958	1.67294	0.0943398	0.510116	1.0476	0.992074	1.10628
SHBG	OBS	-0.0463871	0.0277869	-1.66938	0.0950412	0.510846	0.954672	0.904087	1.00813
TBIL	OBS	0.0411704	0.0275331	1.4953	0.134835	0.532715	1.04203	0.98712	1.09963
GLUC	OBS	0.0382968	0.0278723	1.37401	0.169439	0.54072	1.03904	0.983839	1.09743
VITD	OBS	0.0309669	0.027939	1.10837	0.2677	0.553101	1.03145	0.976638	1.08968
TPROT	OBS	0.0252074	0.0279426	0.902115	0.366996	0.636282	1.02553	0.970915	1.08331
HDL	OBS	-0.0207994	0.0279095	-0.745243	0.456125	0.725129	0.979415	0.927294	1.03451
CAL	OBS	-0.0214461	0.0277987	-0.77148	0.440422	0.728391	0.978782	0.926848	1.03356
APOA	OBS	-0.0194449	0.0278468	-0.69828	0.485002	0.733082	0.980743	0.928656	1.03577
PHOS	OBS	0.0175116	0.0276353	0.633668	0.526297	0.756748	1.01767	0.964053	1.07436
HBA1C	OBS	0.0154203	0.0277229	0.556228	0.578055	0.801818	1.01554	0.961849	1.07227
ALB	OBS	-0.0140057	0.0279922	-0.500341	0.616835	0.803755	0.986092	0.933483	1.04175
ALP	OBS	-0.01418	0.0276036	-0.5137	0.607462	0.816277	0.98592	0.934098	1.04085
AST	OBS	0.0117283	0.0279353	0.41984	0.674602	0.879027	1.0118	0.957862	1.06872
TRIG	OBS	0.00921549	0.0277611	0.331957	0.739922	0.909047	1.00926	0.955785	1.06567
IGF1	OBS	-0.00490343	0.0285695	-0.171632	0.863727	0.996584	0.995109	0.940912	1.05242
CREA	OBS	1.90352e-05	0.0277557	0.000685814	0.999453	0.999453	1.00002	0.94706	1.05592
BMI	ISC	0.110165	0.0261102	4.21924	2.45132e-05	0.000351356	1.11646	1.0608	1.17513
HDL	ISC	-0.087783	0.026063	-3.36811	0.000756849	0.00827925	0.91596	0.870341	0.963965
CRP	ISC	0.0850962	0.0262322	3.24395	0.00117883	0.0116291	1.08882	1.03431	1.14634
DBP	ISC	0.0793421	0.0262936	3.01754	0.00254832	0.0219155	1.08257	1.0282	1.13984
GGT	ISC	0.0765809	0.0261743	2.9258	0.00343568	0.0295468	1.07959	1.02563	1.13646
TRIG	ISC	0.0693906	0.0261457	2.654	0.00795446	0.057007	1.07185	1.0183	1.1282
APOB	ISC	0.0707152	0.0265365	2.66483	0.00770272	0.0631844	1.07328	1.01907	1.13079
CHO	ISC	0.0660351	0.0263412	2.50691	0.0121791	0.0748144	1.06826	1.01463	1.12501
LDL	ISC	0.0635676	0.0264123	2.40674	0.0160955	0.0988723	1.06563	1.01204	1.12244
APOA	ISC	-0.0617355	0.0260365	-2.37112	0.0177344	0.10894	0.940131	0.893354	0.989352
SBP	ISC	0.0456489	0.0261193	1.74771	0.0805148	0.294341	1.04671	0.994475	1.1017
SHBG	ISC	-0.0391515	0.0259974	-1.50598	0.132073	0.334066	0.961605	0.91385	1.0119
HBA1C	ISC	0.0341019	0.0261075	1.30621	0.191482	0.433354	1.03469	0.983098	1.08904
ALP	ISC	0.032106	0.0261502	1.22775	0.21954	0.488475	1.03263	0.981131	1.08704
TBIL	ISC	0.0255672	0.0259952	0.983535	0.325344	0.598242	1.0259	0.974793	1.07937
TPROT	ISC	-0.023071	0.0261734	-0.881468	0.378064	0.677365	0.977193	0.928351	1.02866
ALB	ISC	0.0170565	0.0263193	0.648062	0.516945	0.857778	1.0172	0.966091	1.07109
PHOS	ISC	0.0145661	0.0261151	0.557764	0.577006	0.918908	1.01467	0.964074	1.068
ALT	ISC	0.0132108	0.0261246	0.505684	0.613078	0.925086	1.0133	0.962768	1.06659
CAL	ISC	0.0112947	0.0261927	0.431216	0.666311	0.926596	1.01136	0.960732	1.06462
IGF1	ISC	0.0083221	0.0268591	0.309843	0.75668	0.944767	1.00836	0.956651	1.06287
URA	ISC	-0.0112191	0.026314	-0.426354	0.66985	0.947055	0.988844	0.939127	1.04117
CREA	ISC	0.00508835	0.0260712	0.195171	0.845259	0.947271	1.0051	0.955025	1.05779
AST	ISC	0.00918866	0.0261918	0.350822	0.725722	0.953248	1.00923	0.958711	1.06238
VITD	ISC	-0.00323694	0.0259705	-0.124639	0.90081	0.974713	0.996768	0.947418	1.04895
GLUC	ISC	-0.00059686	0.0260962	-0.0228716	0.981753	0.987933	0.999403	0.949599	1.05189
URT	ISC	0.000610939	0.0260798	0.0234257	0.981311	0.988415	1.00061	0.95089	1.05325
SBP	HYP	0.173416	0.0165091	10.5043	8.25578e-26	1.77499e-24	1.18936	1.15153	1.22852
DBP	HYP	0.138581	0.0165529	8.37201	5.66432e-17	1.21783e-15	1.14864	1.112	1.18655
BMI	HYP	0.11031	0.0163831	6.73318	1.65993e-11	3.56884e-10	1.11662	1.08136	1.15309
GGT	HYP	0.0632575	0.0163969	3.85788	0.000114373	0.00245901	1.0653	1.03162	1.10011
SHBG	HYP	-0.0456041	0.016314	-2.79539	0.00518373	0.0743002	0.95542	0.92535	0.986462
ALT	HYP	0.0413635	0.0163784	2.52548	0.011554	0.158593	1.04223	1.00932	1.07625
ALB	HYP	0.0396996	0.0164988	2.40621	0.0161189	0.165081	1.0405	1.0074	1.07471
HDL	HYP	-0.0382224	0.0163438	-2.33864	0.0193538	0.166443	0.962499	0.932151	0.993829
TRIG	HYP	0.0381664	0.0163637	2.33239	0.0196803	0.16925	1.0389	1.00611	1.07277
CRP	HYP	0.032703	0.0163852	1.99589	0.0459461	0.31522	1.03324	1.0006	1.06698
TPROT	HYP	0.0233952	0.0164428	1.42283	0.154786	0.631963	1.02367	0.991216	1.05721
URT	HYP	0.0211712	0.0163572	1.29431	0.195559	0.662842	1.0214	0.989205	1.05471
APOA	HYP	-0.0200463	0.0163185	-1.22844	0.219281	0.686028	0.980153	0.949298	1.01201
URA	HYP	0.0183506	0.01645	1.11554	0.26462	0.758578	1.01852	0.986205	1.0519
CREA	HYP	-0.0167667	0.0163637	-1.02463	0.305539	0.821137	0.983373	0.952328	1.01542
HBA1C	HYP	-0.0166057	0.0163367	-1.01647	0.309405	0.831527	0.983531	0.952537	1.01554
VITD	HYP	-0.0127243	0.0162849	-0.781353	0.434595	0.934379	0.987356	0.956362	1.01941
CAL	HYP	-0.00664485	0.0164063	-0.405018	0.685464	0.944445	0.993377	0.961935	1.02584
APOB	HYP	0.00603321	0.0163651	0.368662	0.712379	0.944563	1.00605	0.974329	1.03888
IGF1	HYP	0.00878393	0.0168074	0.522624	0.601236	0.948458	1.00882	0.97613	1.04261
TBIL	HYP	0.00585548	0.0162992	0.359249	0.719409	0.949818	1.00587	0.974214	1.03849
GLUC	HYP	-0.0072317	0.0163375	-0.442645	0.658023	0.950508	0.992794	0.961511	1.02511
ALP	HYP	-0.00487046	0.0162963	-0.298869	0.76504	0.96652	0.995141	0.963876	1.02746
PHOS	HYP	0.00178772	0.0163425	0.109391	0.912892	0.967956	1.00179	0.970216	1.03441
CHO	HYP	-0.00064477	0.0163762	-0.0393723	0.968594	0.968594	0.999355	0.967809	1.03198
AST	HYP	-0.00220763	0.0164012	-0.134602	0.892926	0.96866	0.997795	0.966224	1.03039
LDL	HYP	0.000288022	0.016342	0.0176246	0.985938	0.985938	1.00029	0.968786	1.03288
BMI	ANG	0.130598	0.0362829	3.59943	0.00031892	0.00685678	1.13951	1.06134	1.22357
GGT	ANG	0.118935	0.0363217	3.27448	0.00105857	0.0227593	1.1263	1.04896	1.20948
SHBG	ANG	-0.105138	0.0359812	-2.92202	0.0034777	0.0381062	0.9002	0.838923	0.966011
HDL	ANG	-0.0853506	0.0360479	-2.3677	0.017899	0.109951	0.91819	0.855559	0.985423
TRIG	ANG	0.0831922	0.0362496	2.29498	0.0217341	0.133457	1.08675	1.01218	1.16674
CRP	ANG	0.0794008	0.0363852	2.18223	0.0290925	0.155459	1.08264	1.00823	1.1628
DBP	ANG	0.0774846	0.0363679	2.13058	0.0331239	0.163379	1.08057	1.00622	1.16041
CHO	ANG	0.0772011	0.0364841	2.11602	0.0343429	0.169847	1.08026	1.00596	1.16063
APOB	ANG	0.0749572	0.0366797	2.04356	0.0409968	0.17283	1.07784	1.00344	1.15861
ALT	ANG	0.0681822	0.036389	1.87371	0.0609708	0.227766	1.07056	0.996981	1.14984
LDL	ANG	0.0662164	0.0365087	1.81372	0.0697212	0.249834	1.06846	0.995016	1.14812
APOA	ANG	-0.0646891	0.0359859	-1.79762	0.072237	0.258849	0.937359	0.873523	1.00587
GLUC	ANG	0.0484259	0.0361687	1.33889	0.180607	0.485381	1.04962	0.977864	1.12683
IGF1	ANG	0.0381224	0.0372967	1.02214	0.306715	0.609786	1.03886	0.965652	1.11768
TPROT	ANG	-0.0329241	0.0361479	-0.910816	0.362392	0.677516	0.967612	0.901479	1.03872
CAL	ANG	0.0294738	0.0362456	0.81317	0.416121	0.718502	1.02991	0.959251	1.10571
HBA1C	ANG	0.0291693	0.0363466	0.802532	0.422245	0.726262	1.0296	0.958841	1.10568
AST	ANG	0.0261866	0.0364646	0.718139	0.472672	0.812996	1.02653	0.955685	1.10255
URT	ANG	0.0203189	0.0362254	0.560904	0.574863	0.83764	1.02053	0.950891	1.096
PHOS	ANG	-0.0179186	0.0361026	-0.496324	0.619666	0.859536	0.982241	0.915184	1.05432
SBP	ANG	0.0146445	0.0360307	0.406446	0.684415	0.891813	1.01475	0.945562	1.08901
ALB	ANG	-0.0151678	0.0365107	-0.415435	0.677823	0.895284	0.984947	0.916977	1.05808
URA	ANG	-0.0126987	0.0364673	-0.348221	0.727674	0.934092	0.987382	0.91926	1.06053
ALP	ANG	0.0114144	0.03616	0.315664	0.752257	0.937359	1.01148	0.942462	1.08599
TBIL	ANG	0.00935211	0.0361416	0.258763	0.795818	0.942778	1.0094	0.940052	1.08316
CREA	ANG	0.00462344	0.0361975	0.127728	0.898364	0.944654	1.00463	0.935816	1.07849
VITD	ANG	0.00248651	0.0359182	0.069227	0.944809	0.967304	1.00249	0.934588	1.0759
BMI	MYO	0.126442	0.037712	3.35283	0.000799911	0.0114654	1.13478	1.054	1.22194
GGT	MYO	0.113218	0.0377328	3.00051	0.00269524	0.033896	1.11988	1.04011	1.20592
ALB	MYO	0.105151	0.0380756	2.76162	0.00575147	0.0494627	1.11088	1.03107	1.19705
DBP	MYO	0.104358	0.0379968	2.74649	0.00602359	0.0518029	1.11	1.03034	1.19583
CHO	MYO	0.100056	0.0380669	2.62842	0.00857819	0.0737724	1.10523	1.02604	1.19117
APOB	MYO	0.100995	0.0385912	2.61706	0.00886902	0.0762736	1.10627	1.0261	1.19368
PHOS	MYO	0.0958186	0.0377697	2.53692	0.0111832	0.0961759	1.10056	1.02213	1.18525
ALP	MYO	0.0961155	0.0382176	2.51495	0.0119049	0.102382	1.10089	1.02167	1.18679
TRIG	MYO	0.0844203	0.0376637	2.24143	0.0249985	0.153562	1.08809	1.01062	1.17141
LDL	MYO	0.0851376	0.0382216	2.22747	0.0259156	0.159196	1.08887	1.01064	1.174
CRP	MYO	0.0834696	0.0379863	2.19736	0.0279948	0.162687	1.08705	1.00918	1.17123
CAL	MYO	0.0753632	0.0376732	2.00045	0.045452	0.197095	1.07828	1.00149	1.16087
CREA	MYO	0.0761544	0.0375237	2.0295	0.0424073	0.197692	1.07913	1.00262	1.1615
AST	MYO	0.0655051	0.0378651	1.72996	0.0836369	0.257319	1.0677	0.991305	1.14994
HDL	MYO	-0.0620416	0.0374547	-1.65644	0.0976319	0.262386	0.939844	0.873333	1.01146
SBP	MYO	0.0576638	0.0377161	1.52889	0.126291	0.285817	1.05936	0.98387	1.14064
HBA1C	MYO	0.0515686	0.0379381	1.35928	0.174057	0.340202	1.05292	0.977514	1.13426
URA	MYO	0.0507528	0.0379905	1.33594	0.18157	0.354887	1.05206	0.97657	1.1334
SHBG	MYO	-0.0476356	0.0375706	-1.2679	0.204835	0.40036	0.953481	0.88583	1.0264
APOA	MYO	-0.0340934	0.0375368	-0.908266	0.363738	0.585777	0.966481	0.897937	1.04029
VITD	MYO	0.0323469	0.0376335	0.859525	0.390051	0.621192	1.03288	0.95973	1.1123
URT	MYO	0.0198699	0.0376856	0.527255	0.598017	0.779234	1.02007	0.947777	1.09868
GLUC	MYO	0.0166044	0.0376339	0.441208	0.659062	0.820243	1.01674	0.944529	1.09468
TPROT	MYO	0.0111006	0.0377688	0.293911	0.768826	0.893501	1.01116	0.93908	1.08894
IGF1	MYO	0.011349	0.0390051	0.290962	0.771081	0.896121	1.01141	0.93698	1.09178
ALT	MYO	0.0095831	0.0374786	0.255696	0.798186	0.922539	1.00963	0.938246	1.08673
TBIL	MYO	-0.00847184	0.0377725	-0.224286	0.822535	0.930763	0.991564	0.920457	1.06739
CHO	CAD	0.123157	0.0301729	4.08172	4.47033e-05	0.000640747	1.13106	1.06629	1.20018
GGT	CAD	0.121587	0.0299354	4.06164	4.87284e-05	0.00069844	1.12929	1.06499	1.19759
APOB	CAD	0.122152	0.0304911	4.00615	6.17157e-05	0.000884592	1.12993	1.06464	1.19981
LDL	CAD	0.109028	0.0302421	3.60517	0.000311946	0.00447122	1.11519	1.05125	1.18356
TRIG	CAD	0.105454	0.0298413	3.53385	0.00040956	0.00587036	1.11122	1.04808	1.17814
HDL	CAD	-0.102524	0.0296815	-3.45413	0.000552077	0.0079131	0.902557	0.851546	0.956624
BMI	CAD	0.102083	0.0297722	3.42881	0.000606234	0.00868935	1.10748	1.04474	1.17408
DBP	CAD	0.0871474	0.0299422	2.91052	0.00360824	0.0387886	1.09106	1.02888	1.15702
CRP	CAD	0.0765708	0.0298846	2.56221	0.0104007	0.0894463	1.07958	1.01823	1.14479
TBIL	CAD	0.0711593	0.0293581	2.42384	0.0153574	0.110061	1.07375	1.01354	1.13717
SHBG	CAD	-0.0724762	0.0296362	-2.44553	0.0144641	0.113905	0.930088	0.877615	0.985736
APOA	CAD	-0.0705289	0.0297227	-2.3729	0.0176492	0.126486	0.931901	0.879159	0.987804
ALT	CAD	0.0663279	0.029927	2.21632	0.0266694	0.184689	1.06858	1.00779	1.13323
SBP	CAD	0.0651325	0.0297757	2.18744	0.0287103	0.195543	1.0673	1.00681	1.13146
AST	CAD	0.0576024	0.0298398	1.93039	0.0535582	0.224716	1.05929	0.9991	1.12308
HBA1C	CAD	0.0519378	0.0298531	1.73978	0.0818973	0.310167	1.05331	0.993477	1.11682
VITD	CAD	0.0358715	0.029806	1.2035	0.228784	0.490584	1.03652	0.977877	1.09908
CAL	CAD	0.0323962	0.029702	1.09071	0.275402	0.538286	1.03293	0.974491	1.09483
IGF1	CAD	0.0273103	0.030687	0.889964	0.373485	0.591274	1.02769	0.967705	1.09141
PHOS	CAD	0.0259014	0.029713	0.871718	0.383362	0.61054	1.02624	0.968222	1.08783
CREA	CAD	-0.0255929	0.0296962	-0.861825	0.388784	0.615292	0.974732	0.919604	1.03314
URT	CAD	-0.0223761	0.0295605	-0.75696	0.449074	0.643672	0.977872	0.922999	1.03641
ALB	CAD	0.0170005	0.0299754	0.567148	0.570613	0.681566	1.01715	0.959144	1.07874
URA	CAD	0.0151453	0.0299605	0.505508	0.613202	0.701262	1.01526	0.957348	1.07666
TPROT	CAD	0.0125379	0.0298374	0.420209	0.674333	0.763061	1.01262	0.955134	1.07365
ALP	CAD	0.00729145	0.029865	0.244147	0.807117	0.913317	1.00732	0.950168	1.06818
GLUC	CAD	-0.00443538	0.0296417	-0.149633	0.881054	0.971419	0.995574	0.939423	1.05518
BMI	OART	0.123016	0.0242581	5.07114	3.95447e-07	5.66807e-06	1.1309	1.07843	1.18602
ALP	OART	0.0514787	0.0243151	2.11715	0.0342469	0.294523	1.05283	1.00392	1.10432
GGT	OART	0.0482887	0.0242792	1.98889	0.0467135	0.401736	1.04947	1.00072	1.10065
VITD	OART	-0.0439582	0.0240003	-1.83157	0.0670156	0.480279	0.956994	0.913102	1.00318
ALB	OART	-0.0365271	0.0244356	-1.49483	0.134958	0.66278	0.964132	0.919059	1.01145
HDL	OART	-0.0371018	0.0242524	-1.52982	0.126061	0.677576	0.963578	0.91885	1.0105
APOA	OART	-0.030713	0.0241772	-1.27033	0.203967	0.680795	0.969754	0.924872	1.01682
CRP	OART	0.0272483	0.0242802	1.12224	0.261759	0.703477	1.02762	0.979902	1.07775
TPROT	OART	0.0257057	0.0243659	1.05499	0.291432	0.703854	1.02604	0.978222	1.07627
TBIL	OART	0.0340299	0.0240536	1.41475	0.157141	0.705463	1.03462	0.986855	1.08444
CREA	OART	-0.0225478	0.0242771	-0.92877	0.353008	0.758968	0.977704	0.932259	1.02534
APOB	OART	-0.0220824	0.024162	-0.91393	0.360754	0.77562	0.97816	0.93304	1.02574
CAL	OART	-0.0208444	0.0243992	-0.854306	0.392935	0.844811	0.979371	0.933619	1.02733
CHO	OART	-0.0200907	0.0242635	-0.828019	0.40766	0.876469	0.98011	0.93467	1.02794
AST	OART	0.0170958	0.0243319	0.702611	0.482298	0.87835	1.01724	0.969856	1.06692
LDL	OART	-0.0191123	0.0241614	-0.791026	0.428929	0.883635	0.981069	0.935807	1.02878
ALT	OART	0.0156081	0.024224	0.644324	0.519366	0.885755	1.01573	0.968672	1.06517
SHBG	OART	-0.0157897	0.0241627	-0.653474	0.513451	0.892947	0.984334	0.938823	1.0321
GLUC	OART	-0.0154819	0.0242262	-0.639055	0.522787	0.897175	0.984637	0.938996	1.03254
PHOS	OART	0.0150476	0.0242661	0.620108	0.535187	0.900472	1.01516	0.968036	1.06464
HBA1C	OART	-0.0119054	0.0242215	-0.491521	0.623058	0.905808	0.988165	0.942359	1.03622
DBP	OART	0.0103101	0.0244349	0.421939	0.67307	0.933613	1.01036	0.963108	1.05993
URT	OART	-0.00772186	0.0241792	-0.319359	0.749454	0.961806	0.992308	0.946491	1.0406
TRIG	OART	0.00323746	0.0242761	0.13336	0.893909	0.963979	1.00324	0.956603	1.05211
URA	OART	-0.00250278	0.0243811	-0.102653	0.918239	0.965859	0.9975	0.950947	1.04632
IGF1	OART	0.0056918	0.0249305	0.228307	0.819408	0.965969	1.00571	0.957751	1.05608
SBP	OART	0.00896985	0.0242681	0.369614	0.71167	0.970031	1.00901	0.962138	1.05817
HBA1C	RA	-0.120162	0.0552195	-2.17607	0.0295497	0.151924	0.886777	0.795844	0.98821
APOA	RA	0.117112	0.0552382	2.12012	0.0339956	0.162423	1.12425	1.00894	1.25292
ALP	RA	-0.110648	0.0545469	-2.0285	0.0425093	0.189246	0.895254	0.80492	0.996834
BMI	RA	0.0929153	0.0553416	1.67894	0.0931637	0.250377	1.09737	0.984599	1.22318
ALT	RA	-0.08959	0.0547333	-1.63685	0.101663	0.257147	0.914306	0.821518	1.01812
CREA	RA	0.0903566	0.0554663	1.62904	0.103305	0.266155	1.09456	0.981762	1.22025
GLUC	RA	-0.0874545	0.055239	-1.5832	0.113375	0.270607	0.916261	0.822298	1.02114
DBP	RA	-0.0796955	0.0562455	-1.41692	0.156506	0.316267	0.923398	0.826924	1.03094
HDL	RA	0.0780584	0.0554997	1.40646	0.159586	0.326772	1.08119	0.969844	1.20559
CHO	RA	0.0712503	0.0562507	1.26666	0.205279	0.367791	1.07385	0.962322	1.19975
SBP	RA	-0.0647228	0.0553433	-1.16948	0.242211	0.433962	0.937327	0.840965	1.04474
URA	RA	-0.0461602	0.0555172	-0.831458	0.405715	0.660656	0.954889	0.856406	1.06464
TPROT	RA	-0.0388601	0.0557589	-0.696931	0.485846	0.720392	0.961885	0.86248	1.07322
TRIG	RA	0.0339524	0.0552679	0.614325	0.539	0.799208	1.03454	0.928154	1.15271
TBIL	RA	-0.0317958	0.0554969	-0.572929	0.566693	0.817709	0.968704	0.868052	1.07913
URT	RA	-0.0306372	0.0551057	-0.555972	0.57823	0.828796	0.969827	0.871168	1.0813
AST	RA	-0.0307489	0.0557177	-0.55187	0.581037	0.83282	0.969719	0.869268	1.08151
GGT	RA	-0.0300437	0.0552675	-0.543606	0.586713	0.840955	0.970403	0.870817	1.0815
LDL	RA	0.0303477	0.0559109	0.542787	0.587277	0.841763	1.03081	0.924591	1.15117
ALB	RA	-0.0296682	0.0560583	-0.529239	0.59664	0.855183	0.970768	0.869896	1.08371
CRP	RA	0.027699	0.0556225	0.497981	0.618497	0.886513	1.02809	0.922098	1.14679
PHOS	RA	0.0271893	0.0552989	0.491678	0.622947	0.892891	1.02756	0.922188	1.14543
VITD	RA	0.0255159	0.05527	0.46166	0.644325	0.895579	1.02584	0.921122	1.14399
APOB	RA	0.0195948	0.0558735	0.350698	0.725815	0.916062	1.01979	0.914827	1.13885
CAL	RA	0.0117557	0.055994	0.209945	0.833711	0.953668	1.01183	0.906557	1.1291
IGF1	RA	-0.00308055	0.0571371	-0.0539151	0.957003	0.988654	0.996924	0.891322	1.11511
SHBG	RA	0.000540553	0.0552022	0.00979224	0.992187	0.992187	1.00054	0.898072	1.11508
HDL	COPD	-0.130305	0.0297587	-4.37873	1.19373e-05	0.000171102	0.877827	0.828076	0.930541
BMI	COPD	0.118247	0.0298973	3.95512	7.6497e-05	0.00109646	1.12552	1.06151	1.19351
APOA	COPD	-0.111809	0.0297005	-3.76454	0.000166853	0.00239156	0.894215	0.843626	0.947799
ALB	COPD	-0.0927728	0.0298779	-3.10506	0.00190238	0.0165846	0.911401	0.859572	0.966385
HBA1C	COPD	-0.0766349	0.0297799	-2.57338	0.0100712	0.0481178	0.926228	0.873712	0.981905
GGT	COPD	0.0494261	0.0299891	1.64814	0.0993247	0.305069	1.05067	0.990713	1.11431
URA	COPD	0.0431517	0.0300634	1.43536	0.151185	0.40631	1.0441	0.984351	1.10747
TPROT	COPD	-0.0402498	0.0297057	-1.35495	0.175433	0.443743	0.960549	0.906252	1.01818
AST	COPD	-0.0371855	0.0298597	-1.24534	0.213007	0.493315	0.963497	0.908697	1.02154
CAL	COPD	-0.03487	0.0298741	-1.16723	0.243118	0.522703	0.965731	0.91078	1.02394
CHO	COPD	-0.0322117	0.0297567	-1.0825	0.27903	0.571347	0.968302	0.913566	1.0266
SHBG	COPD	0.0289849	0.0296362	0.978022	0.328063	0.58778	1.02941	0.971364	1.09104
VITD	COPD	0.0315222	0.0298718	1.05525	0.291311	0.588726	1.03202	0.973504	1.09445
ALT	COPD	-0.0279629	0.0297426	-0.940163	0.347134	0.621949	0.972424	0.917405	1.03086
GLUC	COPD	0.0251148	0.0298321	0.841871	0.39986	0.716416	1.02543	0.967236	1.08723
ALP	COPD	-0.0199378	0.0296035	-0.673494	0.500633	0.821892	0.98026	0.925112	1.03895
TBIL	COPD	-0.0158347	0.0299507	-0.528691	0.59702	0.838742	0.98429	0.927967	1.04359
CREA	COPD	-0.0190162	0.0297981	-0.638168	0.523364	0.843313	0.981163	0.925485	1.04016
LDL	COPD	-0.0170079	0.0297307	-0.572066	0.567277	0.847737	0.983136	0.927667	1.04234
SBP	COPD	-0.0145669	0.0298549	-0.487923	0.625605	0.867774	0.985539	0.929521	1.04493
IGF1	COPD	-0.012523	0.0307026	-0.407881	0.683361	0.89044	0.987555	0.929884	1.04882
APOB	COPD	-0.0118765	0.0297117	-0.399725	0.689359	0.898256	0.988194	0.932496	1.04769
PHOS	COPD	0.00938099	0.0297199	0.315647	0.75227	0.931168	1.00943	0.952343	1.07002
DBP	COPD	0.00988696	0.0300985	0.328487	0.742544	0.9342	1.00994	0.952068	1.0713
CRP	COPD	0.00934075	0.0296946	0.31456	0.753095	0.935537	1.00938	0.952368	1.06994
URT	COPD	0.00343715	0.0297147	0.115672	0.907913	0.952201	1.00344	0.946856	1.06384
TRIG	COPD	0.00340147	0.0299304	0.113646	0.909519	0.953885	1.00341	0.9462	1.064
SHBG	ANX	-0.0654302	0.0335521	-1.95011	0.0511633	0.275003	0.936664	0.877081	1.00038
TPROT	ANX	0.062577	0.034083	1.83602	0.0663548	0.291898	1.06458	0.995856	1.13821
GGT	ANX	0.0590189	0.0338161	1.74529	0.0809342	0.295544	1.0608	0.992797	1.13353
HBA1C	ANX	-0.0609647	0.0337894	-1.80426	0.0711911	0.295788	0.940856	0.880576	1.00529
AST	ANX	-0.0523356	0.0339457	-1.54175	0.123135	0.407293	0.94901	0.887867	1.01424
BMI	ANX	0.0505264	0.0337548	1.49687	0.134428	0.435168	1.05182	0.984513	1.1238
TRIG	ANX	0.050693	0.0337344	1.50271	0.132913	0.436157	1.052	0.984653	1.12387
LDL	ANX	0.0398083	0.0340536	1.16899	0.242409	0.561861	1.04061	0.973726	1.11279
APOB	ANX	0.0375813	0.0340329	1.10426	0.269479	0.566185	1.0383	0.971617	1.11029
CHO	ANX	0.0344719	0.034106	1.01073	0.312146	0.617427	1.03507	0.96836	1.10688
ALP	ANX	-0.0240725	0.0336226	-0.71596	0.474016	0.695322	0.976215	0.914116	1.0429
CREA	ANX	0.0244412	0.0339885	0.719101	0.472079	0.696596	1.02474	0.958694	1.09533
ALT	ANX	0.0260982	0.0337576	0.773106	0.43946	0.698419	1.02644	0.960804	1.09674
ALB	ANX	-0.0220838	0.0341164	-0.647307	0.517433	0.71773	0.978158	0.914952	1.04588
URT	ANX	-0.0212348	0.0336241	-0.631534	0.527691	0.731959	0.978989	0.916785	1.04596
CAL	ANX	0.0211814	0.0339513	0.623877	0.532709	0.738918	1.02141	0.95561	1.09165
HDL	ANX	-0.0170919	0.0339321	-0.503711	0.614465	0.749318	0.983053	0.919825	1.05069
VITD	ANX	0.0170684	0.0336849	0.506708	0.61236	0.750588	1.01721	0.952461	1.08692
URA	ANX	0.0206723	0.0340917	0.606374	0.544267	0.75495	1.02089	0.954887	1.09142
SBP	ANX	0.0176109	0.0337775	0.521379	0.602103	0.755096	1.01777	0.952569	1.08743
DBP	ANX	0.0167087	0.0341855	0.488766	0.625007	0.760027	1.01685	0.950945	1.08732
PHOS	ANX	-0.00534826	0.0337677	-0.158384	0.874154	0.945849	0.994666	0.931017	1.06279
APOA	ANX	-0.00630065	0.0337942	-0.186442	0.852098	0.946723	0.993719	0.930042	1.06179
GLUC	ANX	0.00239552	0.0339711	0.0705164	0.943783	0.984059	1.0024	0.937879	1.07148
TBIL	ANX	0.00176095	0.0335118	0.0525471	0.958093	0.984074	1.00176	0.9378	1.06948
CRP	ANX	0.00100943	0.0337716	0.02989	0.976155	0.98435	1.00101	0.936962	1.06959
IGF1	ANX	0.00207168	0.0345691	0.0599289	0.952212	0.985133	1.00207	0.936425	1.07233
URA	FLU	0.12748	0.0485198	2.62738	0.00860458	0.123332	1.13596	1.03291	1.2493
CRP	FLU	0.0971101	0.0486048	1.99795	0.0457218	0.49151	1.10198	1.00204	1.21237
BMI	FLU	0.0934503	0.0482247	1.93781	0.0526465	0.544542	1.09796	0.99899	1.20688
DBP	FLU	0.0923743	0.0486424	1.89905	0.0575583	0.578189	1.09678	0.997024	1.20648
GGT	FLU	0.0886841	0.0485652	1.82608	0.067838	0.583407	1.09274	0.993585	1.20195
TPROT	FLU	-0.0696675	0.0483382	-1.44125	0.149514	0.642909	0.932704	0.848486	1.02551
HBA1C	FLU	-0.0692439	0.0482226	-1.43592	0.151025	0.660146	0.933099	0.848991	1.02566
SBP	FLU	0.0710027	0.0483873	1.46738	0.142272	0.667417	1.07358	0.976439	1.18039
HDL	FLU	-0.0651104	0.0481034	-1.35355	0.17588	0.729711	0.936964	0.8527	1.02966
TBIL	FLU	-0.0607131	0.0490266	-1.23837	0.215579	0.772491	0.941093	0.854241	1.03531
ALB	FLU	-0.0452854	0.0485101	-0.933525	0.350549	0.783177	0.955725	0.869137	1.05118
TRIG	FLU	0.0440637	0.0482249	0.913713	0.360868	0.783514	1.04505	0.950702	1.14854
AST	FLU	-0.0437359	0.0484081	-0.903485	0.366269	0.790144	0.957207	0.870475	1.05239
ALT	FLU	0.0504474	0.0483726	1.04289	0.296999	0.805375	1.05174	0.956795	1.15656
CREA	FLU	0.0397988	0.0482859	0.824231	0.409808	0.806125	1.0406	0.946621	1.14389
ALP	FLU	0.0591436	0.048793	1.21213	0.225462	0.807905	1.06093	0.964525	1.16783
URT	FLU	0.0406887	0.0487802	0.834123	0.404211	0.808553	1.04153	0.947163	1.14679
IGF1	FLU	-0.0332773	0.049598	-0.670939	0.502259	0.907926	0.96727	0.87767	1.06604
APOB	FLU	-0.0223768	0.0482115	-0.464139	0.642548	0.914893	0.977872	0.890301	1.07551
APOA	FLU	-0.0300811	0.0481458	-0.624792	0.532108	0.916697	0.970367	0.88301	1.06644
VITD	FLU	0.0124527	0.0483685	0.257454	0.796828	0.926043	1.01253	0.921408	1.11378
GLUC	FLU	-0.00865415	0.0482816	-0.179243	0.857747	0.987602	0.991383	0.901975	1.08992
CAL	FLU	-0.00376393	0.048356	-0.077838	0.937957	0.988261	0.996243	0.906084	1.0952
PHOS	FLU	-0.00282548	0.0481791	-0.0586454	0.953235	0.988618	0.997179	0.90743	1.09607
LDL	FLU	-0.00793373	0.0482451	-0.164446	0.86938	0.989082	0.992098	0.903146	1.09117
CHO	FLU	0.00542883	0.0484129	0.112136	0.910716	0.989242	1.00544	0.914833	1.10602
SHBG	FLU	-0.000394032	0.0481589	-0.00818191	0.993472	0.993472	0.999606	0.909669	1.0987
SHBG	PROST	-0.165727	0.0499568	-3.3174	0.000908608	0.0190808	0.847278	0.768204	0.934435
URT	PROST	0.116097	0.0508908	2.2813	0.0225308	0.473148	1.1231	1.0172	1.24186
VITD	PROST	0.0963691	0.0506371	1.90313	0.057023	0.773124	1.10117	0.997601	1.21669
TRIG	PROST	0.076706	0.0497508	1.5418	0.123121	0.79359	1.07972	0.979333	1.19028
HBA1C	PROST	-0.040717	0.0492899	-0.826072	0.408763	0.887821	0.960101	0.871716	1.05757
ALB	PROST	0.0306598	0.0498496	0.615047	0.538524	0.88964	1.03113	0.935166	1.13703
CREA	PROST	0.0296531	0.0491843	0.602898	0.546577	0.889647	1.0301	0.935434	1.1344
GLUC	PROST	-0.0728973	0.0496097	-1.46941	0.14172	0.900484	0.929696	0.84363	1.02478
HDL	PROST	0.0324579	0.0495569	0.654963	0.512492	0.902356	1.03299	0.93743	1.13848
AST	PROST	-0.0493387	0.0493813	-0.999137	0.317728	0.903538	0.951859	0.863914	1.04849
GGT	PROST	0.0515886	0.0495457	1.04123	0.297768	0.903644	1.05294	0.955583	1.16047
SBP	PROST	0.0377994	0.0496505	0.76131	0.446472	0.906459	1.03852	0.942195	1.14469
TBIL	PROST	0.040795	0.0495203	0.823803	0.410052	0.90684	1.04164	0.944829	1.14734
CRP	PROST	0.0475599	0.0501792	0.947801	0.343231	0.906959	1.04871	0.950654	1.15736
URA	PROST	0.0338702	0.0504677	0.671126	0.50214	0.909277	1.03445	0.936965	1.14198
ALP	PROST	-0.0216546	0.0494238	-0.438142	0.661284	0.909857	0.978578	0.888462	1.07845
BMI	PROST	-0.0661274	0.0493056	-1.34117	0.179864	0.915099	0.936012	0.849763	1.031
CAL	PROST	0.0223596	0.0492055	0.454414	0.649531	0.917481	1.02261	0.928523	1.12611
TPROT	PROST	0.0353021	0.0502032	0.703186	0.48194	0.917832	1.03593	0.938923	1.14319
APOB	PROST	-0.0318753	0.0488463	-0.652563	0.514038	0.919331	0.968627	0.880654	1.06656
ALT	PROST	0.0255551	0.0495595	0.515646	0.606102	0.923436	1.02588	0.931077	1.13078
DBP	PROST	-0.0153459	0.0494416	-0.310384	0.756269	0.929287	0.984771	0.893783	1.08498
LDL	PROST	-0.00952829	0.0488662	-0.194987	0.845403	0.938656	0.990517	0.900473	1.09065
APOA	PROST	0.00712253	0.0497917	0.143047	0.886253	0.95013	1.00715	0.91353	1.11048
CHO	PROST	-0.00532196	0.0489025	-0.108828	0.913339	0.953486	0.994692	0.904075	1.09516
IGF1	PROST	0.00421277	0.0511265	0.0823991	0.934329	0.957118	1.00422	0.908447	1.11009
PHOS	PROST	-0.000336492	0.0496642	-0.00677534	0.994594	0.994594	0.999664	0.907044	1.10204
ALP	BREAST	-0.0705945	0.0317911	-2.22057	0.0263799	0.363271	0.93184	0.875669	0.991895
ALB	BREAST	0.0593257	0.0327203	1.81312	0.0698138	0.586436	1.06112	0.995288	1.1315
HDL	BREAST	-0.0348063	0.032283	-1.07816	0.280962	0.932109	0.965793	0.906591	1.0289
APOA	BREAST	-0.035693	0.0321149	-1.11141	0.266391	0.9333	0.964937	0.906071	1.02764
HBA1C	BREAST	0.0380325	0.0321729	1.18213	0.237155	0.934842	1.03877	0.975311	1.10642
SBP	BREAST	0.0283834	0.0321871	0.881825	0.377871	0.935941	1.02879	0.965896	1.0958
URA	BREAST	-0.0190254	0.0322898	-0.589209	0.555721	0.936744	0.981154	0.92097	1.04525
AST	BREAST	-0.0356937	0.0323643	-1.10287	0.270083	0.938061	0.964936	0.905584	1.02809
CREA	BREAST	0.0189481	0.0323525	0.585678	0.558092	0.939731	1.01913	0.956496	1.08584
TBIL	BREAST	0.0371644	0.0316214	1.17529	0.239878	0.941087	1.03786	0.975268	1.10399
PHOS	BREAST	0.0217738	0.0321334	0.677607	0.498021	0.941162	1.02201	0.959682	1.08852
TRIG	BREAST	0.00409794	0.0320102	0.12802	0.898133	0.941902	1.00411	0.943	1.06908
CRP	BREAST	-0.00382258	0.031968	-0.119575	0.90482	0.942042	0.996185	0.935734	1.06067
GGT	BREAST	-0.00743537	0.0321007	-0.231626	0.816828	0.942185	0.992592	0.932073	1.05707
BMI	BREAST	-0.0353365	0.0322148	-1.0969	0.272684	0.943028	0.965281	0.906212	1.0282
ALT	BREAST	0.00483766	0.032261	0.149954	0.880801	0.944732	1.00485	0.943339	1.07051
VITD	BREAST	-0.016286	0.0318698	-0.511019	0.609338	0.944853	0.983846	0.924452	1.04748
TPROT	BREAST	-0.0184006	0.0323636	-0.568558	0.569656	0.945084	0.981768	0.92147	1.04612
CHO	BREAST	-0.0149654	0.0324458	-0.461244	0.644624	0.94535	0.985146	0.92461	1.05002
SHBG	BREAST	-0.0275183	0.0319451	-0.861425	0.389004	0.945512	0.972857	0.91385	1.03577
DBP	BREAST	-0.0278844	0.0326225	-0.854759	0.392684	0.946785	0.972501	0.912237	1.03669
APOB	BREAST	-0.0151372	0.0320862	-0.471766	0.637093	0.947538	0.984977	0.925186	1.0492
GLUC	BREAST	0.016666	0.0321296	0.518712	0.603962	0.947939	1.01681	0.95479	1.08295
CAL	BREAST	-0.0121364	0.0324832	-0.373622	0.708686	0.950453	0.987937	0.926968	1.05285
IGF1	BREAST	0.0121551	0.0329866	0.368486	0.712511	0.955543	1.01223	0.948863	1.07985
URT	BREAST	0.00187734	0.0321092	0.0584674	0.953376	0.969641	1.00188	0.940982	1.06721
LDL	BREAST	0.000799732	0.032263	0.0247879	0.980224	0.980224	1.0008	0.939711	1.06641

## Sheet: Table S3
Metabolite	Spearman correlation value (r)	P-value	FDR
S_LDL_PL	0.580868	0.000763569	0.0491819
L_LDL_CE_pct	0.575528	0.000876252	0.0491819
M_LDL_PL	0.567964	0.00106071	0.0491819
ApoB_by_ApoA1	0.556841	0.00139339	0.0491819
S_LDL_L	0.547942	0.00172162	0.0491819
S_LDL_C	0.533704	0.00238662	0.0491819
M_LDL_FC	0.531479	0.00250838	0.0491819
M_LDL_L	0.5297	0.00260963	0.0491819
M_LDL_C	0.529255	0.00263548	0.0491819
LDL_C	0.52881	0.00266156	0.0491819
L_LDL_CE	0.527475	0.00274113	0.0491819
L_VLDL_FC	0.52703	0.0027681	0.0491819
LDL_L	0.525695	0.00285041	0.0491819
LDL_CE	0.522581	0.0030507	0.0491819
M_LDL_CE	0.519466	0.003263	0.0491819
LDL_PL	0.518576	0.00332594	0.0491819
S_HDL_PL_pct	-0.518131	0.0033578	0.0491819
S_LDL_FC	0.511012	0.00390444	0.0504274
L_LDL_C	0.507008	0.00424423	0.0504274
Clinical_LDL_C	0.503893	0.00452573	0.0504274
L_VLDL_PL	0.500779	0.00482305	0.0504274
L_LDL_L	0.499889	0.004911	0.0504274
M_LDL_P	0.498999	0.00500032	0.0504274
L_VLDL_L	0.497219	0.00518313	0.0504274
M_VLDL_L	0.496329	0.00527666	0.0504274
S_LDL_P	0.496329	0.00527666	0.0504274
L_VLDL_C	0.494549	0.00546803	0.0504274
L_VLDL_P	0.492157	0.00573459	0.0509969
non_HDL_C	0.489655	0.0060251	0.0517328
L_VLDL_TG	0.486986	0.00634881	0.0526951
XL_HDL_PL_pct	-0.482536	0.00692117	0.0531662
L_LDL_PL_pct	-0.481201	0.00710119	0.0531662
XL_VLDL_C	0.481201	0.00710119	0.0531662
S_LDL_CE	0.479422	0.00734737	0.0531662
M_VLDL_TG	0.478532	0.00747315	0.0531662
VLDL_size	0.475862	0.0078615	0.0543754
HDL_size	-0.471858	0.00847596	0.0552161
XL_VLDL_CE	0.470523	0.00868958	0.0552161
Creatinine	0.465628	0.0095122	0.0552161
XL_VLDL_L	0.465184	0.00959013	0.0552161
LDL_P	0.463404	0.00990725	0.0552161
XL_VLDL_FC	0.463404	0.00990725	0.0552161
L_LDL_PL	0.462959	0.0099879	0.0552161
L_HDL_CE	-0.461179	0.010316	0.0552161
VLDL_L	0.460734	0.0103995	0.0552161
LDL_FC	0.459399	0.0106532	0.0552161
L_LDL_P	0.458954	0.0107389	0.0552161
XL_VLDL_P	0.45856	0.0108153	0.0552161
TG_by_PG	0.45762	0.0109995	0.0552161
XL_VLDL_TG	0.457175	0.0110876	0.0552161
XL_VLDL_PL	0.45317	0.011907	0.0577261
L_HDL_C	-0.451835	0.0121911	0.0577261
PUFA_pct	-0.45139	0.0122871	0.0577261
VLDL_TG	0.449166	0.0127765	0.0587492
XL_HDL_FC_pct	0.448276	0.0129767	0.0587492
L_HDL_PL	-0.443382	0.0141257	0.0628088
Total_TG	0.440267	0.0149	0.0650897
L_HDL_P	-0.438042	0.0154745	0.0664338
M_VLDL_P	0.430923	0.017438	0.0716005
PUFA_by_MUFA	-0.430033	0.0176974	0.0716005
L_LDL_FC	0.429588	0.0178282	0.0716005
S_VLDL_P	0.429588	0.0178282	0.0716005
L_VLDL_CE	0.424694	0.0193213	0.0763652
ApoB	0.42069	0.0206184	0.079553
L_HDL_L	-0.420245	0.0207668	0.079553
S_VLDL_L	0.415795	0.0223003	0.0841328
L_HDL_FC	-0.412681	0.0234281	0.0870685
XL_HDL_PL	-0.410456	0.0242619	0.0888415
M_VLDL_C	0.408676	0.0249464	0.0893553
XL_HDL_C_pct	0.408231	0.02512	0.0893553
XL_HDL_L	-0.400667	0.0282247	0.0975865
M_VLDL_PL	0.400667	0.0282247	0.0975865
VLDL_PL	0.399778	0.0286097	0.0975865
S_VLDL_TG	0.396663	0.0299908	0.100915
Remnant_C	0.392659	0.0318456	0.105727
XL_HDL_CE	-0.388654	0.0337922	0.110714
S_LDL_TG	0.386429	0.0349145	0.112905
VLDL_P	0.385539	0.0353718	0.112918
XL_HDL_P	-0.378865	0.0389572	0.122789
VLDL_FC	0.377976	0.0394566	0.122809
L_HDL_CE_pct	-0.377086	0.039961	0.122843
HDL_L	-0.366852	0.0461421	0.136778
MUFA_pct	0.366852	0.0461421	0.136778
XL_HDL_TG_pct	0.366852	0.0461421	0.136778
Gly	-0.361513	0.0496563	0.145464
S_HDL_P	0.360623	0.0502621	0.145526
S_VLDL_FC	0.359733	0.0508737	0.145604
M_LDL_TG	0.358398	0.0518022	0.145804
HDL_PL	-0.357953	0.0521147	0.145804
M_VLDL_FC	0.353949	0.0549942	0.150775
M_VLDL_CE	0.352614	0.0559814	0.150775
XXL_VLDL_CE	0.352614	0.0559814	0.150775
XL_HDL_C	-0.352169	0.0563136	0.150775
Omega_6_pct	-0.34505	0.0618418	0.163032
MUFA	0.344605	0.0622009	0.163032
S_VLDL_PL	0.341935	0.0643899	0.167011
S_VLDL_C	0.340601	0.0655068	0.168157
S_VLDL_CE	0.339266	0.0666386	0.168564
IDL_CE	0.338821	0.0670193	0.168564
VLDL_CE	0.335706	0.0697313	0.173631
Leu	0.333037	0.0721231	0.176317
M_HDL_PL	-0.332147	0.0729343	0.176317
M_HDL_PL_pct	0.332147	0.0729343	0.176317
S_HDL_TG_pct	0.327253	0.0775226	0.185607
L_LDL_FC_pct	-0.325473	0.0792451	0.187924
HDL_CE	-0.324583	0.0801173	0.1882
M_LDL_CE_pct	0.323248	0.0814394	0.189518
S_HDL_TG	0.321913	0.0827782	0.19085
S_HDL_C	0.320578	0.0841337	0.192195
Total_C	0.318354	0.0864306	0.194092
L_VLDL_PL_pct	0.317464	0.0873627	0.194092
M_HDL_CE	-0.316574	0.0883024	0.194092
Total_FC	0.315684	0.0892497	0.194092
DHA_pct	-0.314349	0.0906852	0.194092
L_HDL_C_pct	-0.313459	0.091652	0.194092
M_HDL_P	-0.313014	0.0921383	0.194092
HDL_C	-0.312125	0.0931167	0.194092
IDL_P	0.31168	0.0936089	0.194092
VLDL_C	0.31168	0.0936089	0.194092
XL_HDL_CE_pct	0.311235	0.094103	0.194092
L_HDL_PL_pct	0.310345	0.0950972	0.194092
Total_CE	0.310345	0.0950972	0.194092
XS_VLDL_TG	0.305451	0.100708	0.203103
M_HDL_C_pct	-0.303226	0.103339	0.203103
IDL_C	0.302781	0.103872	0.203103
L_HDL_TG_pct	0.302336	0.104406	0.203103
M_HDL_CE_pct	-0.302336	0.104406	0.203103
M_HDL_TG_pct	0.302336	0.104406	0.203103
M_HDL_C	-0.297442	0.110422	0.211501
M_HDL_L	-0.297442	0.110422	0.211501
IDL_PL	0.296552	0.111543	0.212017
S_HDL_CE	0.292102	0.117276	0.221225
HDL_FC	-0.289878	0.120223	0.225079
LDL_TG	0.287208	0.123832	0.229524
IDL_FC	0.286763	0.124441	0.229524
S_HDL_L	0.284538	0.127519	0.2329
XXL_VLDL_C	0.284093	0.128142	0.2329
Total_L	0.282759	0.130022	0.234605
Unsaturation	-0.27475	0.141732	0.253895
S_HDL_PL	0.271635	0.146487	0.260538
M_VLDL_C_pct	-0.268966	0.150653	0.26355
ApoA1	-0.268521	0.151356	0.26355
SFA	0.268521	0.151356	0.26355
IDL_L	0.265851	0.155621	0.269095
M_VLDL_CE_pct	-0.264961	0.157062	0.269713
XS_VLDL_FC	0.264071	0.158512	0.270339
XS_VLDL_P	0.262766	0.160657	0.270376
M_LDL_FC_pct	-0.262736	0.160705	0.270376
Pyruvate	0.259622	0.165907	0.275494
XS_VLDL_L	0.259177	0.16666	0.275494
Total_BCAA	0.258732	0.167415	0.275494
M_HDL_FC	-0.258287	0.168173	0.275494
XXL_VLDL_TG	0.257397	0.169695	0.276171
IDL_FC_pct	-0.253838	0.175883	0.282548
L_LDL_C_pct	0.253838	0.175883	0.282548
Ile	0.250278	0.182228	0.290864
Tyr	0.248498	0.18546	0.29116
XL_HDL_FC	-0.248053	0.186274	0.29116
XXL_VLDL_P	0.248053	0.186274	0.29116
XS_VLDL_PL	0.247608	0.187091	0.29116
bOHbutyrate	-0.243159	0.195396	0.302196
S_HDL_FC	0.239155	0.203086	0.31215
XXL_VLDL_L	0.237375	0.206569	0.315557
Ala	0.228476	0.224602	0.341011
XL_VLDL_C_pct	-0.223582	0.234959	0.354575
L_LDL_TG	0.219132	0.244649	0.366973
Total_FA	0.212903	0.258654	0.385657
IDL_TG	0.211123	0.262749	0.389432
Albumin	0.208009	0.270019	0.397838
M_HDL_FC_pct	-0.204004	0.279554	0.40707
XXL_VLDL_PL	0.204004	0.279554	0.40707
Acetoacetate	-0.203115	0.281702	0.407813
XL_VLDL_CE_pct	-0.202225	0.283861	0.408563
M_VLDL_TG_pct	0.201335	0.28603	0.409319
Citrate	-0.195106	0.30151	0.426568
XXL_VLDL_FC	0.195106	0.30151	0.426568
LA	0.194216	0.303763	0.427328
Lactate	0.191991	0.309443	0.432873
XS_VLDL_C	0.190656	0.312883	0.43524
XS_VLDL_FC_pct	0.189766	0.315189	0.436012
XL_HDL_TG	0.188877	0.317506	0.43679
Acetone	-0.187542	0.321001	0.438365
GlycA	0.187097	0.322172	0.438365
XL_VLDL_PL_pct	0.177308	0.34858	0.47172
Glucose	0.173749	0.358496	0.479923
XS_VLDL_CE	0.173749	0.358496	0.479923
Sphingomyelins	0.167964	0.374963	0.497234
M_LDL_TG_pct	-0.167075	0.377535	0.497234
L_VLDL_CE_pct	-0.16663	0.378825	0.497234
L_HDL_TG	-0.16574	0.381413	0.497234
PUFA	0.16574	0.381413	0.497234
XXL_VLDL_FC_pct	-0.162625	0.390549	0.506493
HDL_P	-0.159511	0.399809	0.515816
Omega_6	0.157731	0.405157	0.518911
S_LDL_C_pct	0.156396	0.409193	0.518911
M_LDL_C_pct	0.155951	0.410544	0.518911
Phe	0.155951	0.410544	0.518911
XL_VLDL_TG_pct	0.153281	0.4187	0.526547
HDL_TG	0.151502	0.424187	0.530767
LDL_size	-0.145717	0.442292	0.54966
LA_pct	-0.145273	0.443702	0.54966
L_VLDL_FC_pct	0.143493	0.449365	0.55392
His	0.139488	0.462248	0.566994
IDL_CE_pct	0.137709	0.468035	0.571278
XS_VLDL_CE_pct	-0.134149	0.479723	0.582688
XXL_VLDL_CE_pct	0.131479	0.488587	0.590573
L_LDL_TG_pct	-0.12792	0.500534	0.600996
SFA_pct	0.127475	0.502037	0.600996
S_LDL_TG_pct	0.116796	0.538788	0.641905
M_VLDL_FC_pct	-0.114572	0.546601	0.645041
S_VLDL_CE_pct	-0.114572	0.546601	0.645041
XL_VLDL_FC_pct	-0.112347	0.554467	0.650027
Total_PL	0.111902	0.556047	0.650027
S_LDL_FC_pct	-0.109677	0.563975	0.656214
XS_VLDL_C_pct	-0.106563	0.57516	0.663032
XS_VLDL_TG_pct	0.106563	0.57516	0.663032
Total_P	-0.0976641	0.607652	0.697259
S_LDL_PL_pct	-0.0967742	0.610943	0.697654
Val	0.0949944	0.617548	0.697654
L_HDL_FC_pct	-0.0945495	0.619203	0.697654
L_VLDL_TG_pct	-0.0945495	0.619203	0.697654
S_HDL_FC_pct	0.0918799	0.629176	0.705698
M_HDL_TG	0.0807564	0.671405	0.749686
Omega_6_by_Omega_3	-0.0789766	0.678258	0.753957
XXL_VLDL_TG_pct	-0.0780868	0.681694	0.754408
S_VLDL_FC_pct	-0.0731924	0.700702	0.772012
IDL_PL_pct	-0.0714127	0.707659	0.772838
XXL_VLDL_PL_pct	0.0714127	0.707659	0.772838
L_VLDL_C_pct	-0.0682981	0.719888	0.782761
Omega_3	0.0669633	0.725151	0.785055
Gln	0.0634038	0.739243	0.796847
S_VLDL_C_pct	-0.0602892	0.751643	0.80672
XS_VLDL_PL_pct	-0.0593993	0.755197	0.807056
M_LDL_PL_pct	-0.0576196	0.762319	0.809624
S_LDL_CE_pct	0.0571746	0.764103	0.809624
Acetate	-0.0496107	0.794599	0.83837
IDL_C_pct	-0.0482759	0.800013	0.84052
Phosphoglyc	0.0416018	0.827215	0.865448
S_HDL_C_pct	0.0380423	0.841806	0.877028
S_VLDL_PL_pct	-0.0304783	0.872976	0.903855
DHA	-0.0300334	0.874815	0.903855
XXL_VLDL_C_pct	0.0269188	0.887711	0.913389
S_VLDL_TG_pct	0.0238042	0.900636	0.922874
Cholines	0.0224694	0.906182	0.924752
Omega_3_pct	-0.0149055	0.937688	0.951003
Phosphatidylc	0.0144605	0.939545	0.951003
M_VLDL_PL_pct	0.0126808	0.946974	0.954642
S_HDL_CE_pct	0.00645161	0.973008	0.976932
IDL_TG_pct	0.000222469	0.999069	0.999069
