# Supplementary material for: Transforming polygenic risk prediction: functional annotation and digital twin modeling with whole-exome sequencing
Source: Research Square preprint supplement (doi:10.21203/rs.3.rs-6169446/v1), 2025-03-10
Supplement: Supplementary file 8 [file e2ef231a75b7e7065f9c5e2a.xlsx]

## Sheet: Description
Supplementary Data 2	Supplementary information on functional annotation and independent SNPs (FUMA)
Table S1	Summary of the functional annotation analysis for the exome-based summary statistics. Summary statistics from the reference dataset (UK Biobank) obtained from ANNOVAR. Annotation was performed with FUMA5. The European 1000 Genomes Project was used as a reference for annotation.
Table S2	Summary of the functional annotation analysis for the imputed array-based summary statistics. Summary statistics from the reference dataset (UK Biobank) obtained from ANNOVAR. Annotation was performed with FUMA5. The European 1000 Genomes Project was used as a reference for annotation.
Table S3	Genomic risk loci identified in the exome-based summary statistics using FUMA. Independent SNPs and lead SNPs from the exome-based reference dataset (UK Biobank). Independent SNPs were defined at a genome-wide significance level (P-value < 5.00E-08) and r2 < 0.6. From this subset, lead SNPs were defined at r2 < 0.1. The European 1000 Genomes Project was used as a reference for identification
Table S4	Genomic risk loci identified in the imputed array-based summary statistics using FUMA. Independent SNPs and lead SNPs from the imputed array-based reference dataset (UK Biobank). Independent SNPs were defined at a genome-wide significance level (P-value < 5.00E-08) and r2 < 0.6. From this subset, lead SNPs were defined at r2 < 0.1. The European 1000 Genomes Project was used as a reference for ide…

## Sheet: Table S1
Measurement	Annotation	Reference count (1KG)	Reference proportion (1KG)	Dataset count	Dataset proportion	Enrichment	Fisher P-value
HBA1C	ncRNA_intronic	2884355	0.114998	1095	0.489276	4.25463	0
HBA1C	intergenic	11684523	0.465859	279	0.124665	0.267602	1.18738e-262
APOA	intergenic	11684523	0.465859	191	0.12283	0.263663	2.57717e-185
ALP	intergenic	11684523	0.465859	176	0.119728	0.257005	6.54324e-179
APOA	intronic	9137749	0.36432	1092	0.702251	1.92757	8.89246e-161
GGT	intergenic	11684523	0.465859	311	0.178633	0.383449	7.25187e-140
ALP	intronic	9137749	0.36432	975	0.663265	1.82056	2.87326e-119
TBIL	intronic	9137749	0.36432	678	0.72591	1.99251	1.69446e-111
GGT	intronic	9137749	0.36432	1083	0.622056	1.70745	3.66113e-105
HDL	intergenic	11684523	0.465859	158	0.150476	0.323008	3.9785e-104
URT	intergenic	11684523	0.465859	365	0.214202	0.4598	2.54646e-103
URT	intronic	9137749	0.36432	1057	0.620305	1.70264	1.67837e-101
TBIL	intergenic	11684523	0.465859	145	0.155246	0.333248	1.10931e-89
CREA	intronic	9137749	0.36432	1187	0.5726	1.5717	2.25811e-82
HDL	intronic	9137749	0.36432	689	0.65619	1.80114	9.99501e-82
IGF1	intronic	9137749	0.36432	1121	0.56502	1.55089	1.67036e-73
IGF1	intergenic	11684523	0.465859	550	0.277218	0.595068	2.39573e-66
PHOS	intronic	9137749	0.36432	366	0.729084	2.00122	8.42828e-62
CREA	intergenic	11684523	0.465859	598	0.288471	0.619224	3.90484e-61
APOB	intronic	9137749	0.36432	1055	0.545502	1.49732	6.30697e-59
AST	intergenic	11684523	0.465859	56	0.121475	0.260755	1.5154e-56
APOB	intergenic	11684523	0.465859	579	0.29938	0.64264	1.97778e-50
PHOS	intergenic	11684523	0.465859	82	0.163347	0.350636	2.7983e-46
CAL	intergenic	11684523	0.465859	34	0.103343	0.221834	8.46786e-46
CAL	intronic	9137749	0.36432	245	0.744681	2.04403	1.10338e-44
CRP	intergenic	11684523	0.465859	257	0.253953	0.545128	1.05196e-43
VITD	intergenic	11684523	0.465859	21	0.0820312	0.176086	7.47406e-41
TRIG	ncRNA_intronic	2884355	0.114998	22	0.0175299	0.152436	1.6477e-39
TPROT	intergenic	11684523	0.465859	38	0.120635	0.258952	2.67393e-39
TPROT	intronic	9137749	0.36432	228	0.72381	1.98674	2.60582e-38
LDL	intronic	9137749	0.36432	857	0.517512	1.42049	8.58456e-37
URA	intergenic	11684523	0.465859	36	0.121622	0.26107	8.92092e-37
AST	intronic	9137749	0.36432	300	0.650759	1.78623	1.75743e-35
SBP	intronic	9137749	0.36432	214	0.713333	1.95799	1.47263e-34
DBP	intergenic	11684523	0.465859	9	0.0517241	0.11103	7.43804e-34
CHO	intronic	9137749	0.36432	863	0.506158	1.38933	9.97823e-33
LDL	intergenic	11684523	0.465859	537	0.324275	0.696081	1.21862e-31
TRIG	intronic	9137749	0.36432	658	0.524303	1.43913	1.09112e-30
TBIL	ncRNA_intronic	2884355	0.114998	16	0.0171306	0.148964	6.16605e-30
DBP	intronic	9137749	0.36432	136	0.781609	2.14539	4.02765e-29
CRP	intronic	9137749	0.36432	543	0.536561	1.47278	9.34734e-29
VITD	intronic	9137749	0.36432	181	0.707031	1.94069	1.45907e-28
APOB	ncRNA_intronic	2884355	0.114998	87	0.0449845	0.391175	3.30365e-27
CHO	intergenic	11684523	0.465859	580	0.340176	0.730213	7.22833e-26
LDL	ncRNA_intronic	2884355	0.114998	70	0.0422705	0.367575	1.60732e-25
CHO	ncRNA_intronic	2884355	0.114998	78	0.0457478	0.397812	1.40943e-23
SBP	intergenic	11684523	0.465859	57	0.19	0.407849	2.62568e-23
ALP	UTR3	233824	0.0093225	64	0.0435374	4.67014	2.67588e-23
ALT	ncRNA_intronic	2884355	0.114998	7	0.0136719	0.118887	1.83001e-18
GGT	ncRNA_intronic	2884355	0.114998	94	0.053992	0.469502	2.28083e-18
ALB	intergenic	11684523	0.465859	30	0.165746	0.355786	2.38008e-17
PHOS	ncRNA_intronic	2884355	0.114998	9	0.0179283	0.1559	2.98159e-16
URA	intronic	9137749	0.36432	177	0.597973	1.64134	4.29497e-16
IGF1	ncRNA_intronic	2884355	0.114998	122	0.0614919	0.53472	7.20302e-16
TBIL	exonic	254736	0.0101563	43	0.0460385	4.53302	9.04314e-16
APOB	UTR3	233824	0.0093225	61	0.0315408	3.3833	1.04274e-15
SHBG	intronic	9137749	0.36432	787	0.456497	1.25301	4.83133e-15
GGT	UTR3	233824	0.0093225	55	0.031591	3.38869	2.36657e-14
LDL	exonic	254736	0.0101563	56	0.0338164	3.32962	2.72744e-14
ALB	intronic	9137749	0.36432	116	0.640884	1.75913	5.06176e-14
CRP	UTR3	233824	0.0093225	40	0.0395257	4.23982	7.79474e-14
ALP	UTR5	71546	0.00285252	27	0.0183673	6.43899	8.80107e-14
ALP	exonic	254736	0.0101563	51	0.0346939	3.41601	1.42648e-13
ALP	ncRNA_intronic	2884355	0.114998	86	0.0585034	0.508732	1.8031e-13
HDL	exonic	254736	0.0101563	42	0.04	3.93846	2.05594e-13
CHO	UTR3	233824	0.0093225	52	0.0304985	3.2715	4.38413e-13
APOB	exonic	254736	0.0101563	58	0.0299897	2.95283	1.28977e-12
GGT	downstream	284177	0.0113301	58	0.0333142	2.94034	1.45934e-12
APOA	ncRNA_intronic	2884355	0.114998	96	0.0617363	0.536845	1.49368e-12
URT	ncRNA_intronic	2884355	0.114998	110	0.064554	0.561347	2.8857e-12
URT	upstream	266686	0.0106327	54	0.0316901	2.98044	5.15707e-12
CHO	exonic	254736	0.0101563	52	0.0304985	3.00293	9.73492e-12
LDL	UTR3	233824	0.0093225	48	0.0289855	3.1092	1.89102e-11
GGT	upstream	266686	0.0106327	52	0.0298679	2.80906	1.00974e-10
SBP	ncRNA_intronic	2884355	0.114998	5	0.0166667	0.14493	1.65613e-10
CREA	ncRNA_intronic	2884355	0.114998	151	0.0728413	0.633411	2.08794e-10
BMI	ncRNA_intronic	2884355	0.114998	11	0.0284974	0.247807	7.47879e-10
VITD	ncRNA_intronic	2884355	0.114998	4	0.015625	0.135871	3.00599e-09
ALT	intronic	9137749	0.36432	252	0.492188	1.35098	3.49411e-09
TRIG	intergenic	11684523	0.465859	482	0.384064	0.824421	5.24078e-09
URA	downstream	284177	0.0113301	18	0.0608108	5.36721	1.33957e-08
SHBG	ncRNA_intronic	2884355	0.114998	127	0.0736659	0.640582	1.36593e-08
URA	exonic	254736	0.0101563	17	0.0574324	5.65488	1.61931e-08
ALP	downstream	284177	0.0113301	43	0.0292517	2.58178	4.09603e-08
IGF1	UTR3	233824	0.0093225	46	0.0231855	2.48705	5.23926e-08
CRP	ncRNA_intronic	2884355	0.114998	65	0.0642292	0.558523	6.77985e-08
HDL	UTR5	71546	0.00285252	16	0.0152381	5.34198	1.12435e-07
SHBG	intergenic	11684523	0.465859	694	0.402552	0.864108	1.36699e-07
URA	UTR3	233824	0.0093225	15	0.0506757	5.43585	1.87721e-07
HDL	ncRNA_intronic	2884355	0.114998	70	0.0666667	0.579718	1.99977e-07
APOA	exonic	254736	0.0101563	39	0.0250804	2.46945	6.40716e-07
VITD	UTR3	233824	0.0093225	13	0.0507812	5.44717	1.17495e-06
TPROT	exonic	254736	0.0101563	15	0.047619	4.68864	1.18402e-06
HBA1C	intronic	9137749	0.36432	706	0.31546	0.865889	1.32472e-06
APOA	upstream	266686	0.0106327	39	0.0250804	2.3588	1.58236e-06
CRP	ncRNA_exonic	259951	0.0103642	29	0.0286561	2.76492	1.61904e-06
ALT	UTR3	233824	0.0093225	18	0.0351562	3.77112	2.45964e-06
TPROT	UTR5	71546	0.00285252	8	0.0253968	8.9033	4.43577e-06
VITD	upstream	266686	0.0106327	13	0.0507812	4.77595	4.83757e-06
APOA	UTR3	233824	0.0093225	34	0.021865	2.3454	8.24646e-06
HDL	UTR3	233824	0.0093225	26	0.0247619	2.65614	1.09473e-05
DBP	exonic	254736	0.0101563	10	0.0574713	5.65871	1.38816e-05
TPROT	ncRNA_intronic	2884355	0.114998	14	0.0444444	0.386479	1.85215e-05
ALB	exonic	254736	0.0101563	10	0.0552486	5.43986	1.95187e-05
TRIG	UTR3	233824	0.0093225	29	0.0231076	2.47869	2.0658e-05
URA	upstream	266686	0.0106327	13	0.0439189	4.13055	2.2548e-05
URA	ncRNA_intronic	2884355	0.114998	13	0.0439189	0.381909	3.38582e-05
AST	UTR3	233824	0.0093225	15	0.032538	3.49026	3.95183e-05
GGT	ncRNA_exonic	259951	0.0103642	38	0.0218265	2.10596	4.08435e-05
GGT	UTR5	71546	0.00285252	16	0.00919012	3.22176	6.17471e-05
CRP	downstream	284177	0.0113301	27	0.0266798	2.35478	6.71511e-05
SBP	exonic	254736	0.0101563	12	0.04	3.93846	7.27247e-05
IGF1	UTR5	71546	0.00285252	17	0.00856855	3.00385	8.59077e-05
BMI	intronic	9137749	0.36432	178	0.46114	1.26576	0.000107705
LDL	UTR5	71546	0.00285252	15	0.00905797	3.17543	0.000120476
URT	UTR3	233824	0.0093225	33	0.0193662	2.07736	0.000122453
CAL	exonic	254736	0.0101563	12	0.0364742	3.5913	0.0001718
VITD	downstream	284177	0.0113301	11	0.0429688	3.79246	0.00019577
CRP	UTR5	71546	0.00285252	11	0.0108696	3.81051	0.000205599
APOA	UTR5	71546	0.00285252	14	0.00900322	3.15623	0.000212016
GGT	exonic	254736	0.0101563	34	0.019529	1.92286	0.000439546
CHO	UTR5	71546	0.00285252	14	0.00821114	2.87856	0.000523859
HBA1C	UTR3	233824	0.0093225	38	0.0169794	1.82134	0.000574944
APOB	UTR5	71546	0.00285252	15	0.00775595	2.71898	0.000603272
PHOS	exonic	254736	0.0101563	14	0.0278884	2.74594	0.000778027
APOA	downstream	284177	0.0113301	33	0.0212219	1.87306	0.00103518
HBA1C	ncRNA_exonic	259951	0.0103642	40	0.0178731	1.72451	0.00113793
URT	downstream	284177	0.0113301	35	0.0205399	1.81287	0.00117125
HDL	upstream	266686	0.0106327	23	0.0219048	2.06013	0.00134146
ALT	intergenic	11684523	0.465859	203	0.396484	0.851083	0.00164525
URA	UTR5	71546	0.00285252	5	0.0168919	5.92175	0.00174169
CRP	upstream	266686	0.0106327	22	0.0217391	2.04455	0.00186562
CHO	downstream	284177	0.0113301	34	0.0199413	1.76004	0.00186628
LDL	downstream	284177	0.0113301	33	0.0199275	1.75882	0.00231068
DBP	ncRNA_intronic	2884355	0.114998	8	0.045977	0.399806	0.00269578
AST	exonic	254736	0.0101563	12	0.0260304	2.56299	0.00311484
SHBG	UTR3	233824	0.0093225	29	0.0168213	1.80438	0.00348515
IGF1	downstream	284177	0.0113301	37	0.0186492	1.64599	0.00395347
CAL	ncRNA_intronic	2884355	0.114998	23	0.0699088	0.607911	0.00923578
APOB	downstream	284177	0.0113301	35	0.0180972	1.59727	0.00932288
DBP	ncRNA_exonic	259951	0.0103642	6	0.0344828	3.32711	0.0100336
BMI	UTR3	233824	0.0093225	9	0.0233161	2.50105	0.0112518
AST	upstream	266686	0.0106327	11	0.0238612	2.24413	0.011555
ALP	splicing	2830	0.000112831	2	0.00136054	12.0582	0.0123147
PHOS	UTR5	71546	0.00285252	5	0.00996016	3.49171	0.0153985
TBIL	downstream	284177	0.0113301	19	0.0203426	1.79546	0.0184367
IGF1	ncRNA_exonic	259951	0.0103642	32	0.016129	1.55623	0.018956
LDL	upstream	266686	0.0106327	28	0.0169082	1.59021	0.021607
CREA	upstream	266686	0.0106327	33	0.015919	1.49717	0.0240273
CRP	exonic	254736	0.0101563	18	0.0177866	1.75129	0.0258563
SHBG	exonic	254736	0.0101563	27	0.0156613	1.54203	0.0296112
TRIG	UTR5	71546	0.00285252	8	0.0063745	2.23469	0.029737
IGF1	exonic	254736	0.0101563	30	0.015121	1.48883	0.0328477
URT	UTR5	71546	0.00285252	10	0.00586854	2.05732	0.0345477
HBA1C	exonic	254736	0.0101563	33	0.0147453	1.45185	0.0347442
VITD	UTR5	71546	0.00285252	3	0.0117188	4.10821	0.0376903
ALP	upstream	266686	0.0106327	24	0.0163265	1.5355	0.0407457
APOB	upstream	266686	0.0106327	30	0.0155119	1.45889	0.0448081
TRIG	exonic	254736	0.0101563	20	0.0159363	1.56911	0.0477333
VITD	exonic	254736	0.0101563	6	0.0234375	2.30769	0.0481364
URT	exonic	254736	0.0101563	25	0.0146714	1.44456	0.0689249
ALT	downstream	284177	0.0113301	10	0.0195312	1.72384	0.0898677
ALP	ncRNA_exonic	259951	0.0103642	22	0.014966	1.44401	0.0919427
IGF1	upstream	266686	0.0106327	29	0.0146169	1.37472	0.0987151
HBA1C	ncRNA_splicing	1313	5.23489e-05	1	0.000446828	8.53556	0.110562
HDL	splicing	2830	0.000112831	1	0.000952381	8.44075	0.111732
AST	downstream	284177	0.0113301	9	0.0195228	1.7231	0.115337
CHO	ncRNA_exonic	259951	0.0103642	11	0.00645161	0.622492	0.119587
PHOS	upstream	266686	0.0106327	9	0.0179283	1.68615	0.121128
ALT	upstream	266686	0.0106327	9	0.0175781	1.65321	0.127111
CAL	UTR3	233824	0.0093225	6	0.0182371	1.95624	0.135768
HDL	downstream	284177	0.0113301	17	0.0161905	1.42898	0.14217
APOB	ncRNA_exonic	259951	0.0103642	13	0.00672182	0.648563	0.142285
LDL	ncRNA_exonic	259951	0.0103642	11	0.00664251	0.640911	0.145586
AST	UTR5	71546	0.00285252	3	0.00650759	2.28135	0.146129
ALB	downstream	284177	0.0113301	4	0.0220994	1.95051	0.151141
CREA	ncRNA_exonic	259951	0.0103642	28	0.013507	1.30324	0.157514
APOA	splicing	2830	0.000112831	1	0.000643087	5.69954	0.160936
LDL	splicing	2830	0.000112831	1	0.000603865	5.35193	0.170445
SHBG	splicing	2830	0.000112831	1	0.000580046	5.14083	0.176786
ALT	exonic	254736	0.0101563	8	0.015625	1.53846	0.187631
PHOS	ncRNA_exonic	259951	0.0103642	8	0.0159363	1.53763	0.187835
APOB	splicing	2830	0.000112831	1	0.000517063	4.58262	0.196065
SBP	UTR5	71546	0.00285252	2	0.00666667	2.33712	0.211299
DBP	UTR3	233824	0.0093225	3	0.0172414	1.84944	0.221908
TPROT	UTR3	233824	0.0093225	5	0.015873	1.70266	0.225693
HBA1C	UTR5	71546	0.00285252	3	0.00134048	0.469929	0.232289
TBIL	UTR3	233824	0.0093225	12	0.012848	1.37817	0.233376
CAL	UTR5	71546	0.00285252	2	0.00607903	2.13111	0.241591
HBA1C	upstream	266686	0.0106327	18	0.0080429	0.75643	0.257392
TRIG	upstream	266686	0.0106327	9	0.00717131	0.674459	0.271142
DBP	upstream	266686	0.0106327	0	0	0	0.271537
CREA	exonic	254736	0.0101563	26	0.0125422	1.23492	0.271921
ALB	ncRNA_exonic	259951	0.0103642	0	0	0	0.271938
SBP	downstream	284177	0.0113301	1	0.00333333	0.294203	0.273582
CREA	downstream	284177	0.0113301	18	0.00868307	0.766375	0.298596
CREA	UTR3	233824	0.0093225	24	0.0115774	1.24188	0.301311
VITD	ncRNA_exonic	259951	0.0103642	4	0.015625	1.5076	0.344679
AST	ncRNA_exonic	259951	0.0103642	2	0.00433839	0.418595	0.348483
SHBG	UTR5	71546	0.00285252	7	0.00406032	1.42342	0.357039
SHBG	downstream	284177	0.0113301	15	0.0087007	0.76793	0.361732
TPROT	ncRNA_exonic	259951	0.0103642	1	0.0031746	0.306305	0.391782
CREA	UTR5	71546	0.00285252	8	0.00385914	1.35289	0.402666
ALB	UTR5	71546	0.00285252	1	0.00552486	1.93684	0.40372
ALB	ncRNA_intronic	2884355	0.114998	17	0.0939227	0.81673	0.41649
TRIG	downstream	284177	0.0113301	17	0.0135458	1.19556	0.422537
BMI	exonic	254736	0.0101563	2	0.00518135	0.510163	0.450213
BMI	ncRNA_exonic	259951	0.0103642	2	0.00518135	0.499929	0.450633
CHO	upstream	266686	0.0106327	21	0.0123167	1.15838	0.477165
TRIG	ncRNA_exonic	259951	0.0103642	10	0.00796813	0.768815	0.485818
ALT	ncRNA_exonic	259951	0.0103642	3	0.00585938	0.565349	0.506424
HDL	ncRNA_exonic	259951	0.0103642	8	0.00761905	0.735133	0.539084
SBP	upstream	266686	0.0106327	4	0.0133333	1.25399	0.566435
CAL	downstream	284177	0.0113301	2	0.00607903	0.53654	0.596957
TBIL	ncRNA_exonic	259951	0.0103642	11	0.0117773	1.13635	0.625841
URT	ncRNA_exonic	259951	0.0103642	15	0.00880282	0.849351	0.6316
ALT	UTR5	71546	0.00285252	2	0.00390625	1.3694	0.660725
ALB	upstream	266686	0.0106327	2	0.0110497	1.03922	0.719016
DBP	downstream	284177	0.0113301	2	0.0114943	1.01449	0.725425
TBIL	upstream	266686	0.0106327	8	0.00856531	0.805563	0.747739
SBP	UTR3	233824	0.0093225	3	0.01	1.07267	0.760859
URA	ncRNA_exonic	259951	0.0103642	2	0.00675676	0.651934	0.774985
SBP	ncRNA_exonic	259951	0.0103642	2	0.00666667	0.643241	0.77527
TPROT	upstream	266686	0.0106327	2	0.00634921	0.59714	0.779137
CAL	ncRNA_exonic	259951	0.0103642	2	0.00607903	0.586542	0.780691
TPROT	downstream	284177	0.0113301	4	0.0126984	1.12077	0.78554
BMI	intergenic	11684523	0.465859	177	0.458549	0.98431	0.798738
BMI	upstream	266686	0.0106327	3	0.00777202	0.730955	0.803877
BMI	downstream	284177	0.0113301	3	0.00777202	0.685965	0.806845
SHBG	upstream	266686	0.0106327	19	0.0110209	1.03651	0.814149
SHBG	ncRNA_exonic	259951	0.0103642	18	0.0104408	1.0074	0.905306
BMI	UTR5	71546	0.00285252	1	0.00259067	0.908206	1
BMI	ncRNA_splicing	1313	5.23489e-05	0	0	0	1
BMI	splicing	2830	0.000112831	0	0	0	1
SBP	ncRNA_splicing	1313	5.23489e-05	0	0	0	1
SBP	splicing	2830	0.000112831	0	0	0	1
DBP	UTR5	71546	0.00285252	0	0	0	1
DBP	ncRNA_splicing	1313	5.23489e-05	0	0	0	1
DBP	splicing	2830	0.000112831	0	0	0	1
LDL	ncRNA_splicing	1313	5.23489e-05	0	0	0	1
HBA1C	downstream	284177	0.0113301	25	0.0111707	0.985934	1
HBA1C	splicing	2830	0.000112831	0	0	0	1
VITD	ncRNA_splicing	1313	5.23489e-05	0	0	0	1
VITD	splicing	2830	0.000112831	0	0	0	1
ALT	ncRNA_splicing	1313	5.23489e-05	0	0	0	1
ALT	splicing	2830	0.000112831	0	0	0	1
ALB	UTR3	233824	0.0093225	1	0.00552486	0.592638	1
ALB	ncRNA_splicing	1313	5.23489e-05	0	0	0	1
ALB	splicing	2830	0.000112831	0	0	0	1
ALP	ncRNA_splicing	1313	5.23489e-05	0	0	0	1
APOA	ncRNA_exonic	259951	0.0103642	16	0.0102894	0.992784	1
APOA	ncRNA_splicing	1313	5.23489e-05	0	0	0	1
APOB	ncRNA_splicing	1313	5.23489e-05	0	0	0	1
AST	ncRNA_intronic	2884355	0.114998	53	0.114967	0.999731	1
AST	ncRNA_splicing	1313	5.23489e-05	0	0	0	1
AST	splicing	2830	0.000112831	0	0	0	1
CAL	ncRNA_splicing	1313	5.23489e-05	0	0	0	1
CAL	splicing	2830	0.000112831	0	0	0	1
CAL	upstream	266686	0.0106327	3	0.00911854	0.857594	1
CHO	ncRNA_splicing	1313	5.23489e-05	0	0	0	1
CHO	splicing	2830	0.000112831	0	0	0	1
CREA	ncRNA_splicing	1313	5.23489e-05	0	0	0	1
CREA	splicing	2830	0.000112831	0	0	0	1
CRP	ncRNA_splicing	1313	5.23489e-05	0	0	0	1
CRP	splicing	2830	0.000112831	0	0	0	1
GGT	ncRNA_splicing	1313	5.23489e-05	0	0	0	1
GGT	splicing	2830	0.000112831	0	0	0	1
HDL	ncRNA_splicing	1313	5.23489e-05	0	0	0	1
IGF1	ncRNA_splicing	1313	5.23489e-05	0	0	0	1
IGF1	splicing	2830	0.000112831	0	0	0	1
PHOS	UTR3	233824	0.0093225	4	0.00796813	0.85472	1
PHOS	downstream	284177	0.0113301	5	0.00996016	0.879092	1
PHOS	ncRNA_splicing	1313	5.23489e-05	0	0	0	1
PHOS	splicing	2830	0.000112831	0	0	0	1
SHBG	ncRNA_splicing	1313	5.23489e-05	0	0	0	1
TBIL	UTR5	71546	0.00285252	2	0.00214133	0.75068	1
TBIL	ncRNA_splicing	1313	5.23489e-05	0	0	0	1
TBIL	splicing	2830	0.000112831	0	0	0	1
TPROT	ncRNA_splicing	1313	5.23489e-05	0	0	0	1
TPROT	splicing	2830	0.000112831	0	0	0	1
TRIG	ncRNA_splicing	1313	5.23489e-05	0	0	0	1
TRIG	splicing	2830	0.000112831	0	0	0	1
URA	ncRNA_splicing	1313	5.23489e-05	0	0	0	1
URA	splicing	2830	0.000112831	0	0	0	1
URT	ncRNA_splicing	1313	5.23489e-05	0	0	0	1
URT	splicing	2830	0.000112831	0	0	0	1

## Sheet: Table S2
Measurement	Annotation	Reference count (1KG)	Reference proportion (1KG)	Dataset count	Dataset proportion	Enrichment	Fisher P-value
TBIL	intronic	9137749	0.36432	1035	0.734043	2.01483	5.06551e-175
TBIL	intergenic	11684523	0.465859	193	0.136879	0.293822	5.55042e-153
SHBG	intergenic	11684523	0.465859	540	0.219067	0.470243	1.2696e-142
APOB	intergenic	11684523	0.465859	389	0.198977	0.427119	7.14411e-134
BMI	intergenic	11684523	0.465859	52	0.0708447	0.152073	4.39248e-123
APOA	intronic	9137749	0.36432	1252	0.622886	1.70972	6.51011e-122
CHO	intergenic	11684523	0.465859	323	0.195995	0.420718	8.05303e-116
APOB	intronic	9137749	0.36432	1211	0.619437	1.70026	1.45122e-115
SHBG	intronic	9137749	0.36432	1453	0.589452	1.61795	1.39432e-113
GGT	intergenic	11684523	0.465859	400	0.21645	0.464626	7.74479e-110
BMI	intronic	9137749	0.36432	561	0.764305	2.0979	5.77311e-108
LDL	intergenic	11684523	0.465859	321	0.201128	0.431736	8.28157e-108
CHO	intronic	9137749	0.36432	1039	0.630461	1.73052	4.57184e-106
ALP	intergenic	11684523	0.465859	712	0.263704	0.566059	3.19564e-103
ALP	intronic	9137749	0.36432	1517	0.561852	1.5422	3.13112e-96
LDL	intronic	9137749	0.36432	990	0.620301	1.70263	2.7227e-95
TRIG	intronic	9137749	0.36432	1001	0.616	1.69082	9.92067e-94
APOA	intergenic	11684523	0.465859	493	0.245274	0.526498	2.01477e-92
URA	intergenic	11684523	0.465859	32	0.0778589	0.16713	1.00564e-66
HDL	intergenic	11684523	0.465859	532	0.286329	0.614627	2.80067e-56
TRIG	intergenic	11684523	0.465859	446	0.274462	0.589152	3.31356e-56
DBP	intronic	9137749	0.36432	367	0.699048	1.91878	1.80244e-54
HDL	intronic	9137749	0.36432	998	0.537137	1.47436	9.70103e-52
CREA	intronic	9137749	0.36432	1043	0.529173	1.4525	5.23847e-50
AST	intronic	9137749	0.36432	612	0.581749	1.59681	2.93126e-46
CREA	intergenic	11684523	0.465859	628	0.31862	0.683941	2.85623e-40
DBP	intergenic	11684523	0.465859	100	0.190476	0.408871	1.04604e-39
AST	ncRNA_intronic	2884355	0.114998	12	0.0114068	0.0991913	2.83289e-39
IGF1	ncRNA_intronic	2884355	0.114998	62	0.0330843	0.287694	1.06582e-37
IGF1	intronic	9137749	0.36432	948	0.50587	1.38853	1.01158e-35
URT	ncRNA_intronic	2884355	0.114998	161	0.05152	0.448006	9.4848e-35
AST	intergenic	11684523	0.465859	298	0.28327	0.60806	1.05154e-33
GGT	intronic	9137749	0.36432	919	0.497294	1.365	2.25476e-31
URT	upstream	266686	0.0106327	107	0.03424	3.22026	1.12953e-24
HBA1C	intronic	9137749	0.36432	950	0.474052	1.3012	1.18989e-23
APOA	ncRNA_intronic	2884355	0.114998	103	0.0512438	0.445604	5.51246e-23
PHOS	intronic	9137749	0.36432	258	0.582393	1.59858	1.51997e-20
CRP	intergenic	11684523	0.465859	410	0.339404	0.728556	5.56898e-19
HBA1C	intergenic	11684523	0.465859	742	0.370259	0.794789	6.42263e-18
VITD	ncRNA_intronic	2884355	0.114998	284	0.192022	1.66978	8.64895e-18
AST	UTR3	233824	0.0093225	46	0.0437262	4.6904	2.75963e-17
TPROT	intergenic	11684523	0.465859	140	0.280561	0.602245	3.03767e-17
TRIG	ncRNA_intronic	2884355	0.114998	89	0.0547692	0.476261	7.57425e-17
CRP	intronic	9137749	0.36432	581	0.48096	1.32016	1.43591e-16
URA	intronic	9137749	0.36432	230	0.559611	1.53604	1.21249e-15
PHOS	ncRNA_intronic	2884355	0.114998	7	0.0158014	0.137405	3.3174e-15
TPROT	downstream	284177	0.0113301	32	0.0641283	5.66001	9.51058e-15
ALP	UTR3	233824	0.0093225	71	0.0262963	2.82074	4.13056e-14
GGT	UTR3	233824	0.0093225	56	0.030303	3.25053	7.44677e-14
CRP	UTR3	233824	0.0093225	44	0.0364238	3.90709	7.68916e-14
IGF1	intergenic	11684523	0.465859	719	0.383671	0.823579	7.5174e-13
SBP	intergenic	11684523	0.465859	20	0.16129	0.346222	1.3947e-12
GGT	ncRNA_exonic	259951	0.0103642	57	0.0308442	2.97604	1.45899e-12
PHOS	intergenic	11684523	0.465859	134	0.302483	0.649302	3.20619e-12
DBP	ncRNA_intronic	2884355	0.114998	16	0.0304762	0.265014	3.46865e-12
CRP	ncRNA_intronic	2884355	0.114998	68	0.0562914	0.489497	3.71955e-12
CHO	UTR3	233824	0.0093225	49	0.029733	3.18938	4.89231e-12
URT	intergenic	11684523	0.465859	1646	0.52672	1.13064	1.01823e-11
LDL	exonic	254736	0.0101563	49	0.0307018	3.02294	2.99151e-11
ALP	ncRNA_intronic	2884355	0.114998	206	0.0762963	0.663455	3.49211e-11
TBIL	ncRNA_intronic	2884355	0.114998	89	0.0631206	0.548882	5.91757e-11
APOB	UTR3	233824	0.0093225	52	0.0265985	2.85315	6.11787e-11
APOB	ncRNA_intronic	2884355	0.114998	138	0.0705882	0.613819	7.42581e-11
ALT	ncRNA_intronic	2884355	0.114998	28	0.0438871	0.381633	3.66925e-10
APOB	exonic	254736	0.0101563	53	0.02711	2.66929	4.04539e-10
CHO	exonic	254736	0.0101563	47	0.0285194	2.80806	7.83804e-10
CAL	intergenic	11684523	0.465859	145	0.32294	0.693214	8.28301e-10
SBP	intronic	9137749	0.36432	79	0.637097	1.74873	8.8475e-10
URT	downstream	284177	0.0113301	77	0.02464	2.17475	9.47159e-10
LDL	ncRNA_intronic	2884355	0.114998	111	0.0695489	0.604781	1.67503e-09
ALT	upstream	266686	0.0106327	27	0.0423197	3.98015	2.8057e-09
TPROT	exonic	254736	0.0101563	23	0.0460922	4.53831	3.64957e-09
LDL	UTR3	233824	0.0093225	42	0.0263158	2.82283	5.24561e-09
HBA1C	ncRNA_intronic	2884355	0.114998	151	0.0753493	0.65522	5.55549e-09
TPROT	ncRNA_intronic	2884355	0.114998	103	0.206413	1.79492	5.66141e-09
CHO	ncRNA_intronic	2884355	0.114998	120	0.0728155	0.633187	1.55352e-08
GGT	ncRNA_intronic	2884355	0.114998	291	0.157468	1.3693	5.08676e-08
URA	ncRNA_intronic	2884355	0.114998	85	0.206813	1.7984	1.00521e-07
SHBG	UTR5	71546	0.00285252	24	0.00973631	3.41323	3.9658e-07
URA	ncRNA_exonic	259951	0.0103642	18	0.0437956	4.22567	4.83606e-07
APOB	downstream	284177	0.0113301	49	0.0250639	2.21216	5.45322e-07
IGF1	UTR3	233824	0.0093225	41	0.0218783	2.34683	1.41425e-06
ALP	downstream	284177	0.0113301	60	0.0222222	1.96135	1.72547e-06
CRP	upstream	266686	0.0106327	32	0.0264901	2.49138	6.6715e-06
TPROT	UTR3	233824	0.0093225	17	0.0340681	3.6544	6.94751e-06
GGT	downstream	284177	0.0113301	44	0.0238095	2.10145	7.69592e-06
GGT	upstream	266686	0.0106327	42	0.0227273	2.13749	1.09063e-05
ALP	exonic	254736	0.0101563	52	0.0192593	1.8963	2.02225e-05
VITD	intronic	9137749	0.36432	461	0.311697	0.85556	2.1902e-05
LDL	downstream	284177	0.0113301	38	0.0238095	2.10145	4.11137e-05
URA	UTR3	233824	0.0093225	14	0.0340633	3.65388	4.32701e-05
URT	intronic	9137749	0.36432	1030	0.3296	0.9047	5.04898e-05
AST	upstream	266686	0.0106327	27	0.0256654	2.41382	5.13699e-05
URA	exonic	254736	0.0101563	14	0.0340633	3.35392	0.000105769
APOB	upstream	266686	0.0106327	40	0.0204604	1.92429	0.000143496
CRP	ncRNA_exonic	259951	0.0103642	28	0.0231788	2.23644	0.000148213
APOA	UTR3	233824	0.0093225	37	0.018408	1.97457	0.000160058
DBP	ncRNA_exonic	259951	0.0103642	16	0.0304762	2.94053	0.000160644
CRP	UTR5	71546	0.00285252	12	0.00993377	3.48246	0.00024461
CHO	downstream	284177	0.0113301	36	0.0218447	1.92803	0.000263846
PHOS	upstream	266686	0.0106327	14	0.0316027	2.97222	0.000358945
IGF1	UTR5	71546	0.00285252	15	0.00800427	2.80604	0.000438901
ALB	intergenic	11684523	0.465859	190	0.386965	0.83065	0.000484042
HBA1C	ncRNA_exonic	259951	0.0103642	38	0.0189621	1.82958	0.000544767
TRIG	UTR3	233824	0.0093225	30	0.0184615	1.98032	0.000635502
CAL	intronic	9137749	0.36432	198	0.44098	1.21042	0.000844195
APOA	downstream	284177	0.0113301	39	0.019403	1.71252	0.00147702
HBA1C	upstream	266686	0.0106327	37	0.0184631	1.73644	0.00149992
SBP	ncRNA_intronic	2884355	0.114998	4	0.0322581	0.280509	0.00171509
SBP	exonic	254736	0.0101563	6	0.0483871	4.76427	0.0017673
AST	downstream	284177	0.0113301	24	0.0228137	2.01355	0.001793
TBIL	exonic	254736	0.0101563	27	0.0191489	1.88543	0.00203641
URA	downstream	284177	0.0113301	12	0.0291971	2.57696	0.00296373
ALP	UTR5	71546	0.00285252	17	0.0062963	2.20728	0.0029648
URT	exonic	254736	0.0101563	16	0.00512	0.504123	0.00308708
CAL	upstream	266686	0.0106327	12	0.0267261	2.51357	0.00362437
HDL	downstream	284177	0.0113301	35	0.0188375	1.66261	0.00416408
TRIG	ncRNA_exonic	259951	0.0103642	6	0.00369231	0.356257	0.00447118
ALB	downstream	284177	0.0113301	13	0.0264766	2.33684	0.00462451
HDL	exonic	254736	0.0101563	32	0.0172228	1.69578	0.00504129
SBP	UTR5	71546	0.00285252	3	0.0241935	8.48147	0.00556733
CREA	ncRNA_intronic	2884355	0.114998	188	0.0953831	0.829429	0.00585823
SBP	UTR3	233824	0.0093225	5	0.0403226	4.3253	0.00634945
URT	ncRNA_exonic	259951	0.0103642	48	0.01536	1.48203	0.0100075
ALT	UTR5	71546	0.00285252	6	0.00940439	3.29687	0.0107822
SHBG	UTR3	233824	0.0093225	36	0.0146045	1.56658	0.0112557
TPROT	upstream	266686	0.0106327	12	0.0240481	2.26171	0.0129478
LDL	upstream	266686	0.0106327	28	0.0175439	1.64999	0.0136662
APOA	exonic	254736	0.0101563	32	0.0159204	1.56755	0.0140127
GGT	exonic	254736	0.0101563	30	0.0162338	1.5984	0.0141342
CREA	upstream	266686	0.0106327	33	0.0167428	1.57465	0.0148747
APOA	UTR5	71546	0.00285252	12	0.00597015	2.09294	0.0177986
ALT	downstream	284177	0.0113301	14	0.0219436	1.93676	0.0216118
TBIL	UTR5	71546	0.00285252	9	0.00638298	2.23766	0.0218512
ALB	upstream	266686	0.0106327	11	0.0224033	2.10702	0.0228429
PHOS	UTR3	233824	0.0093225	9	0.020316	2.17925	0.0248758
HBA1C	exonic	254736	0.0101563	31	0.0154691	1.52311	0.024878
HBA1C	downstream	284177	0.0113301	34	0.0169661	1.49744	0.0256513
CAL	ncRNA_intronic	2884355	0.114998	67	0.14922	1.29759	0.0263217
CRP	downstream	284177	0.0113301	22	0.0182119	1.6074	0.0292534
SHBG	splicing	2830	0.000112831	2	0.000811359	7.1909	0.0321858
ALT	intronic	9137749	0.36432	258	0.404389	1.10998	0.035979
HDL	ncRNA_intronic	2884355	0.114998	185	0.0995694	0.865833	0.0381062
TPROT	ncRNA_exonic	259951	0.0103642	10	0.0200401	1.93359	0.043191
TPROT	intronic	9137749	0.36432	160	0.320641	0.88011	0.0453955
HDL	UTR5	71546	0.00285252	10	0.00538213	1.8868	0.0487626
CHO	ncRNA_exonic	259951	0.0103642	9	0.00546117	0.526927	0.050356
HDL	UTR3	233824	0.0093225	26	0.0139935	1.50105	0.0515747
TPROT	splicing	2830	0.000112831	1	0.00200401	17.7611	0.0547507
DBP	downstream	284177	0.0113301	11	0.0209524	1.84927	0.0573053
ALT	UTR3	233824	0.0093225	11	0.0172414	1.84944	0.0575313
SHBG	upstream	266686	0.0106327	36	0.0146045	1.37354	0.0612078
LDL	ncRNA_exonic	259951	0.0103642	9	0.0056391	0.544095	0.0628694
HDL	ncRNA_exonic	259951	0.0103642	11	0.00592034	0.571232	0.0652389
VITD	ncRNA_exonic	259951	0.0103642	8	0.00540906	0.5219	0.0700327
VITD	UTR3	233824	0.0093225	7	0.00473293	0.507689	0.0762512
ALP	upstream	266686	0.0106327	38	0.0140741	1.32366	0.0900745
HDL	ncRNA_splicing	1313	5.23489e-05	1	0.000538213	10.2813	0.0926894
APOA	ncRNA_exonic	259951	0.0103642	13	0.00646766	0.62404	0.0969705
APOA	ncRNA_splicing	1313	5.23489e-05	1	0.000497512	9.50377	0.099881
ALB	exonic	254736	0.0101563	9	0.0183299	1.80479	0.106421
HDL	upstream	266686	0.0106327	27	0.0145318	1.3667	0.111472
ALT	intergenic	11684523	0.465859	277	0.434169	0.931976	0.112457
GGT	UTR5	71546	0.00285252	9	0.00487013	1.70731	0.119
AST	exonic	254736	0.0101563	16	0.0152091	1.49751	0.120148
AST	UTR5	71546	0.00285252	6	0.00570342	1.99943	0.13324
PHOS	UTR5	71546	0.00285252	3	0.00677201	2.37405	0.134365
CREA	downstream	284177	0.0113301	15	0.00761035	0.671696	0.135077
SBP	ncRNA_exonic	259951	0.0103642	3	0.0241935	2.33434	0.138627
VITD	splicing	2830	0.000112831	1	0.000676133	5.99242	0.153709
BMI	UTR5	71546	0.00285252	4	0.00544959	1.91045	0.15993
LDL	splicing	2830	0.000112831	1	0.000626566	5.55313	0.164809
SBP	downstream	284177	0.0113301	3	0.0241935	2.13534	0.166867
CAL	downstream	284177	0.0113301	8	0.0178174	1.57258	0.178317
APOB	ncRNA_exonic	259951	0.0103642	14	0.00716113	0.69095	0.18005
HDL	splicing	2830	0.000112831	1	0.000538213	4.77007	0.18914
APOB	splicing	2830	0.000112831	1	0.000511509	4.5334	0.197968
APOA	splicing	2830	0.000112831	1	0.000497512	4.40935	0.20293
ALB	intronic	9137749	0.36432	192	0.391039	1.07334	0.222928
PHOS	exonic	254736	0.0101563	7	0.0158014	1.55583	0.228112
APOA	upstream	266686	0.0106327	27	0.0134328	1.26335	0.229573
CAL	exonic	254736	0.0101563	7	0.0155902	1.53503	0.233066
LDL	UTR5	71546	0.00285252	7	0.00438596	1.53758	0.233748
CAL	ncRNA_exonic	259951	0.0103642	7	0.0155902	1.50424	0.241185
BMI	ncRNA_intronic	2884355	0.114998	74	0.100817	0.876685	0.247158
ALP	splicing	2830	0.000112831	1	0.00037037	3.28251	0.262639
TBIL	UTR3	233824	0.0093225	17	0.0120567	1.29329	0.266359
APOB	UTR5	71546	0.00285252	8	0.00409207	1.43455	0.283257
CREA	UTR5	71546	0.00285252	8	0.00405885	1.4229	0.286403
URT	UTR5	71546	0.00285252	12	0.00384	1.34618	0.309082
VITD	intergenic	11684523	0.465859	669	0.452333	0.970965	0.309389
CREA	exonic	254736	0.0101563	15	0.00761035	0.749327	0.310891
CREA	ncRNA_exonic	259951	0.0103642	25	0.0126839	1.22382	0.314751
ALT	ncRNA_exonic	259951	0.0103642	9	0.0141066	1.36109	0.32419
SHBG	downstream	284177	0.0113301	33	0.0133874	1.18158	0.339769
TRIG	UTR5	71546	0.00285252	2	0.00123077	0.431467	0.34492
DBP	UTR3	233824	0.0093225	7	0.0133333	1.43023	0.354412
ALB	ncRNA_intronic	2884355	0.114998	63	0.12831	1.11575	0.357464
BMI	ncRNA_exonic	259951	0.0103642	10	0.013624	1.31453	0.358277
ALB	ncRNA_exonic	259951	0.0103642	7	0.0142566	1.37557	0.36629
HBA1C	UTR5	71546	0.00285252	3	0.00149701	0.524801	0.395692
DBP	UTR5	71546	0.00285252	0	0	0	0.413553
URA	upstream	266686	0.0106327	6	0.0145985	1.37299	0.461676
IGF1	exonic	254736	0.0101563	22	0.0117396	1.1559	0.487608
IGF1	upstream	266686	0.0106327	23	0.0122732	1.15429	0.497363
TBIL	upstream	266686	0.0106327	12	0.00851064	0.800421	0.516488
VITD	exonic	254736	0.0101563	12	0.00811359	0.798876	0.516652
VITD	downstream	284177	0.0113301	19	0.0128465	1.13384	0.538314
CHO	upstream	266686	0.0106327	20	0.0121359	1.14138	0.546346
ALT	exonic	254736	0.0101563	8	0.0125392	1.23463	0.548406
BMI	UTR3	233824	0.0093225	8	0.0108992	1.16913	0.564282
BMI	upstream	266686	0.0106327	9	0.0122616	1.1532	0.588363
URA	UTR5	71546	0.00285252	0	0	0	0.636566
PHOS	downstream	284177	0.0113301	6	0.013544	1.19541	0.648163
IGF1	ncRNA_exonic	259951	0.0103642	21	0.011206	1.08122	0.648692
IGF1	downstream	284177	0.0113301	23	0.0122732	1.08324	0.661777
DBP	upstream	266686	0.0106327	4	0.00761905	0.716568	0.670131
SHBG	exonic	254736	0.0101563	27	0.0109533	1.07848	0.686896
TBIL	downstream	284177	0.0113301	14	0.00992908	0.876348	0.706574
BMI	exonic	254736	0.0101563	8	0.0108992	1.07315	0.714091
TRIG	upstream	266686	0.0106327	15	0.00923077	0.868149	0.715761
CREA	UTR3	233824	0.0093225	16	0.00811771	0.870765	0.724039
SHBG	ncRNA_exonic	259951	0.0103642	27	0.0109533	1.05685	0.764747
ALP	ncRNA_exonic	259951	0.0103642	26	0.00962963	0.929127	0.775936
VITD	upstream	266686	0.0106327	14	0.00946586	0.890259	0.799271
ALB	UTR3	233824	0.0093225	5	0.0101833	1.09234	0.811219
PHOS	ncRNA_exonic	259951	0.0103642	5	0.0112867	1.08901	0.811482
TRIG	downstream	284177	0.0113301	19	0.0116923	1.03197	0.814807
CHO	UTR5	71546	0.00285252	5	0.00303398	1.06361	0.814899
SHBG	ncRNA_intronic	2884355	0.114998	287	0.11643	1.01245	0.825078
DBP	exonic	254736	0.0101563	4	0.00761905	0.750183	0.82556
AST	ncRNA_exonic	259951	0.0103642	11	0.0104563	1.00889	0.879082
CRP	exonic	254736	0.0101563	11	0.00910596	0.896587	0.885401
TRIG	exonic	254736	0.0101563	17	0.0104615	1.03006	0.901067
URT	UTR3	233824	0.0093225	28	0.00896	0.961116	0.925804
BMI	downstream	284177	0.0113301	8	0.0108992	0.961971	1
BMI	ncRNA_splicing	1313	5.23489e-05	0	0	0	1
BMI	splicing	2830	0.000112831	0	0	0	1
SBP	ncRNA_splicing	1313	5.23489e-05	0	0	0	1
SBP	splicing	2830	0.000112831	0	0	0	1
SBP	upstream	266686	0.0106327	1	0.00806452	0.758464	1
DBP	ncRNA_splicing	1313	5.23489e-05	0	0	0	1
DBP	splicing	2830	0.000112831	0	0	0	1
LDL	ncRNA_splicing	1313	5.23489e-05	0	0	0	1
HBA1C	UTR3	233824	0.0093225	18	0.00898204	0.96348	1
HBA1C	ncRNA_splicing	1313	5.23489e-05	0	0	0	1
HBA1C	splicing	2830	0.000112831	0	0	0	1
VITD	UTR5	71546	0.00285252	4	0.00270453	0.94812	1
VITD	ncRNA_splicing	1313	5.23489e-05	0	0	0	1
ALT	ncRNA_splicing	1313	5.23489e-05	0	0	0	1
ALT	splicing	2830	0.000112831	0	0	0	1
ALB	UTR5	71546	0.00285252	1	0.00203666	0.713986	1
ALB	ncRNA_splicing	1313	5.23489e-05	0	0	0	1
ALB	splicing	2830	0.000112831	0	0	0	1
ALP	ncRNA_splicing	1313	5.23489e-05	0	0	0	1
APOB	ncRNA_splicing	1313	5.23489e-05	0	0	0	1
AST	ncRNA_splicing	1313	5.23489e-05	0	0	0	1
AST	splicing	2830	0.000112831	0	0	0	1
CAL	UTR3	233824	0.0093225	4	0.00890869	0.955611	1
CAL	UTR5	71546	0.00285252	1	0.00222717	0.780774	1
CAL	ncRNA_splicing	1313	5.23489e-05	0	0	0	1
CAL	splicing	2830	0.000112831	0	0	0	1
CHO	ncRNA_splicing	1313	5.23489e-05	0	0	0	1
CHO	splicing	2830	0.000112831	0	0	0	1
CREA	ncRNA_splicing	1313	5.23489e-05	0	0	0	1
CREA	splicing	2830	0.000112831	0	0	0	1
CRP	ncRNA_splicing	1313	5.23489e-05	0	0	0	1
CRP	splicing	2830	0.000112831	0	0	0	1
GGT	ncRNA_splicing	1313	5.23489e-05	0	0	0	1
GGT	splicing	2830	0.000112831	0	0	0	1
IGF1	ncRNA_splicing	1313	5.23489e-05	0	0	0	1
IGF1	splicing	2830	0.000112831	0	0	0	1
PHOS	ncRNA_splicing	1313	5.23489e-05	0	0	0	1
PHOS	splicing	2830	0.000112831	0	0	0	1
SHBG	ncRNA_splicing	1313	5.23489e-05	0	0	0	1
TBIL	ncRNA_exonic	259951	0.0103642	14	0.00992908	0.958019	1
TBIL	ncRNA_splicing	1313	5.23489e-05	0	0	0	1
TBIL	splicing	2830	0.000112831	0	0	0	1
TPROT	UTR5	71546	0.00285252	1	0.00200401	0.70254	1
TPROT	ncRNA_splicing	1313	5.23489e-05	0	0	0	1
TRIG	ncRNA_splicing	1313	5.23489e-05	0	0	0	1
TRIG	splicing	2830	0.000112831	0	0	0	1
URA	ncRNA_splicing	1313	5.23489e-05	0	0	0	1
URA	splicing	2830	0.000112831	0	0	0	1
URT	ncRNA_splicing	1313	5.23489e-05	0	0	0	1
URT	splicing	2830	0.000112831	0	0	0	1

## Sheet: Table S3
Measurement	Chromosome	rsID	Position (hg19)	P-value	Start	End	N (SNPs)	N (GWAS)	Significant SNPs	Individual SNPs	N (Lead SNPs)	Lead SNPs
URT	4	rs2241474	10086015	0	8975590	10637811	752	9	9	rs148144831;rs73225891;rs2241474;rs75487798;rs10016702;rs116499739;rs2868941;rs73809629;rs6846414	9	rs148144831;rs73225891;rs2241474;rs75487798;rs10016702;rs116499739;rs2868941;rs73809629;rs6846414
APOA	14	rs1532625	57005301	1.65959e-240	56742475	57293282	69	6	6	rs1803870;rs1532625;rs9930761;rs1800777;rs1672867;rs7186799	6	rs1803870;rs1532625;rs9930761;rs1800777;rs1672867;rs7186799
TBIL	1	rs12468017	234698097	6.85488e-206	234143048	234923124	396	27	27	rs10199278;rs13011156;rs79063407;rs74356516;rs2304773;rs115377744;rs145966524;rs147134923;rs1048603;rs1042591;rs3755322;rs6431631;rs1500481;rs12468017;rs17862888;rs759173;rs191949663;rs10929306;rs112570954;rs72970220;rs142217338;rs34082659;rs11676792;rs12582;rs2302154;rs6708995;rs11563071	25	rs10199278;rs13011156;rs79063407;rs74356516;rs2304773;rs115377744;rs145966524;rs147134923;rs1048603;rs1042591;rs3755322;rs6431631;rs12468017;rs17862888;rs759173;rs191949663;rs10929306;rs112570954;rs72970220;rs142217338;rs11676792;rs12582;rs2302154;rs6708995;rs11563071
SHBG	15	rs1042522	7579472	8.64968e-202	7245371	7911709	87	9	9	rs4796407;rs35985803;rs62061175;rs2071502;rs4968213;rs17881850;rs1042522;rs7359662;rs62623385	9	rs4796407;rs35985803;rs62061175;rs2071502;rs4968213;rs17881850;rs1042522;rs7359662;rs62623385
GGT	18	rs737128	24988920	9.48418e-171	24281393	25151741	212	11	11	rs1803690;rs2070470;rs535696610;rs200426740;rs737128;rs186765281;rs575353765;rs117373046;rs549700472;rs71318991;rs117329800	10	rs1803690;rs2070470;rs535696610;rs200426740;rs737128;rs186765281;rs575353765;rs549700472;rs71318991;rs117329800
VITD	2	rs7041	72618334	7.56833e-166	72599344	72720368	23	2	2	rs7041;rs56097748	2	rs7041;rs56097748
ALP	11	rs4962040	136133531	6.48634e-156	136031346	136382716	55	4	4	rs2073927;rs1053878;rs4962040;rs17758315	4	rs2073927;rs1053878;rs4962040;rs17758315
CRP	7	rs157581	45395714	1.69434e-149	45284627	45426792	37	6	6	rs80168591;rs28399637;rs6859;rs157581;rs741780;rs7412	6	rs80168591;rs28399637;rs6859;rs157581;rs741780;rs7412
URT	5	rs2231142	89052323	1.07152e-143	88765176	89199397	33	4	4	rs17013285;rs2231157;rs2231142;rs116564150	4	rs17013285;rs2231157;rs2231142;rs116564150
CRP	1	rs6588153	66092017	1.15345e-138	65898364	66169679	156	4	4	rs114328096;rs1137101;rs74733149;rs6588153	4	rs114328096;rs1137101;rs74733149;rs6588153
APOB	17	rs3208856	45296806	8.47227e-136	45021856	45690775	232	13	13	rs7260180;rs1058402;rs2965169;rs80168591;rs3208856;rs28399637;rs1135062;rs6859;rs157581;rs741780;rs1132899;rs968445;rs28469095	12	rs7260180;rs1058402;rs2965169;rs80168591;rs3208856;rs28399637;rs6859;rs157581;rs741780;rs1132899;rs968445;rs28469095
CRP	5	rs1169289	121416622	1.48252e-134	121176902	121648132	195	5	5	rs140372512;rs3213570;rs1169289;rs2258227;rs28360458	5	rs140372512;rs3213570;rs1169289;rs2258227;rs28360458
CRP	3	rs1800947	159683438	2.06538e-130	159163119	159732523	110	4	4	rs862999;rs28383572;rs1800947;rs1417938	4	rs862999;rs28383572;rs1800947;rs1417938
HDL	15	rs1800777	57017319	1.39959e-121	56742475	57293282	62	7	7	rs1803870;rs36049418;rs9930761;rs1800777;rs1672867;rs140227724;rs7186799	7	rs1803870;rs36049418;rs9930761;rs1800777;rs1672867;rs140227724;rs7186799
ALP	1	rs1827293	21795388	4.20727e-120	21594662	21977332	150	10	10	rs142246501;rs2072654;rs1827293;rs80145424;rs1767430;rs61778393;rs861212;rs150959892;rs1318235;rs1130564	10	rs142246501;rs2072654;rs1827293;rs80145424;rs1767430;rs61778393;rs861212;rs150959892;rs1318235;rs1130564
TRIG	7	rs11820589	116633862	4.25598e-106	116561514	117186506	173	5	5	rs11820589;rs76836072;rs186808413;rs500389;rs28917234	5	rs11820589;rs76836072;rs186808413;rs500389;rs28917234
GGT	12	rs1169289	121416622	1.02565e-103	121189116	121648132	194	4	4	rs3213570;rs1169289;rs2258227;rs28360458	4	rs3213570;rs1169289;rs2258227;rs28360458
LDL	1	rs11591147	55505647	1.87499e-101	55505647	55720083	14	2	2	rs11591147;rs10493176	2	rs11591147;rs10493176
APOB	5	rs693	21232195	8.51138e-101	21217490	21261507	19	3	3	rs693;rs12714102;rs12691202	2	rs693;rs12691202
HDL	4	rs301	19816934	2.32648e-99	19793581	19939605	6	2	2	rs268;rs301	2	rs268;rs301
APOB	2	rs11591147	55505647	7.00648e-99	55505647	55720083	14	2	2	rs11591147;rs10493176	2	rs11591147;rs10493176
SHBG	11	rs4379723	64963449	9.95635e-99	64874754	65381594	206	2	2	rs34491125;rs4379723	2	rs34491125;rs4379723
GGT	13	rs10144543	103574714	8.64371e-98	103558841	103603496	21	3	3	rs10144543;rs28418471;rs2234131	3	rs10144543;rs28418471;rs2234131
LDL	16	rs2228671	11210912	5.46638e-96	11187324	11277232	129	5	5	rs2228671;rs116959285;rs72658867;rs6413504;rs4804573	5	rs2228671;rs116959285;rs72658867;rs6413504;rs4804573
TRIG	4	rs301	19816934	1.22096e-87	19793581	19939605	6	2	2	rs268;rs301	2	rs268;rs301
APOB	16	rs2228671	11210912	2.55505e-83	11187324	11277232	129	5	5	rs2228671;rs116959285;rs72658867;rs6413504;rs4804573	5	rs2228671;rs116959285;rs72658867;rs6413504;rs4804573
CHO	18	rs2228671	11210912	2.39773e-81	11187324	11277232	79	3	3	rs2228671;rs72658867;rs4804573	3	rs2228671;rs72658867;rs4804573
HBA1C	14	rs7912524	71098295	4.32713e-80	70452260	71144869	253	7	7	rs61743874;rs2229498;rs5030909;rs906220;rs3812691;rs7912524;rs749105	7	rs61743874;rs2229498;rs5030909;rs906220;rs3812691;rs7912524;rs749105
CHO	1	rs11591147	55505647	7.06318e-79	55505647	55720083	14	2	2	rs11591147;rs10493176	2	rs11591147;rs10493176
ALP	12	rs4379723	64963449	3.66606e-78	64874754	65365385	199	1	1	rs4379723	1	rs4379723
LDL	18	rs3208856	45296806	5.68329e-78	45122043	45676294	163	9	9	rs1058402;rs2965169;rs80168591;rs3208856;rs28399637;rs6859;rs157581;rs1132899;rs968445	9	rs1058402;rs2965169;rs80168591;rs3208856;rs28399637;rs6859;rs157581;rs1132899;rs968445
ALP	23	rs838144	49250239	5.40879e-67	49110930	49263886	110	3	3	rs61751862;rs838144;rs3745710	3	rs61751862;rs838144;rs3745710
AST	6	rs1926739	18270422	2.20242e-64	18263873	18290854	19	1	1	rs1926739	1	rs1926739
LDL	4	rs693	21232195	2.28929e-60	21217490	21261507	19	3	3	rs693;rs12714102;rs12691202	2	rs693;rs12691202
PHOS	1	rs1827293	21795388	4.59939e-58	21759020	21977332	102	4	4	rs1827293;rs80145424;rs1318235;rs1130564	4	rs1827293;rs80145424;rs1318235;rs1130564
HBA1C	18	rs2613522	76120065	1.06856e-55	76119293	76121864	4	2	2	rs2613522;rs12449858	2	rs2613522;rs12449858
TRIG	1	rs10889335	62960101	6.08275e-55	62900811	63182135	297	1	1	rs10889335	1	rs10889335
APOA	6	rs301	19816934	1.53886e-53	19793581	19939605	6	2	2	rs268;rs301	2	rs268;rs301
VITD	3	rs1044482	71155171	1.58198e-53	71130343	71235616	143	1	1	rs1044482	1	rs1044482
CHO	20	rs3208856	45296806	3.89045e-53	45122043	45676294	85	7	7	rs1058402;rs2965169;rs3208856;rs28399637;rs6859;rs157581;rs968445	7	rs1058402;rs2965169;rs3208856;rs28399637;rs6859;rs157581;rs968445
APOA	19	rs7412	45412079	7.30634e-50	45388500	45503839	91	3	3	rs157581;rs7412;rs1132899	3	rs157581;rs7412;rs1132899
APOA	17	rs77960347	47109955	7.77141e-49	46567678	47138901	15	2	2	rs41469449;rs77960347	2	rs41469449;rs77960347
HBA1C	2	rs853772	169814655	6.26758e-48	169753676	169815248	90	3	3	rs492594;rs114932341;rs853772	3	rs492594;rs114932341;rs853772
URT	7	rs942379	25849620	2.95189e-46	25759066	25878361	71	1	1	rs942379	1	rs942379
SHBG	22	rs2073787	109694685	7.43361e-46	109682057	109940577	462	1	1	rs2073787	1	rs2073787
APOB	4	rs3895559	109813020	9.62055e-44	109751667	109820919	36	3	3	rs685653;rs3895559;rs6667814	3	rs685653;rs3895559;rs6667814
IGF1	14	rs4988483	1129010	2.90202e-43	1126607	1129872	3	2	2	rs4988483;rs169068	2	rs4988483;rs169068
GGT	1	rs6676143	16528218	1.71514e-42	16514343	16734436	38	2	2	rs6676143;rs526513	1	rs6676143
CAL	5	rs34006803	122277268	3.1842e-42	121933063	122289005	93	3	3	rs17589;rs180794292;rs34006803	3	rs17589;rs180794292;rs34006803
HBA1C	20	rs2072860	37470604	7.09741e-42	37445668	37470604	8	1	1	rs2072860	1	rs2072860
IGF1	11	rs3741211	2169110	3.59667e-41	2136957	2192330	41	4	4	rs3213232;rs3213225;rs3741211;rs4074905	4	rs3213232;rs3213225;rs3741211;rs4074905
CREA	12	rs1145086	45654327	3.87525e-41	45545378	45751889	148	1	1	rs1145086	1	rs1145086
CHO	4	rs693	21232195	1.21899e-40	21217490	21261507	19	3	3	rs693;rs12714102;rs12691202	2	rs693;rs12691202
ALT	5	rs2862954	101912064	9.93116e-39	101592320	102039187	131	2	2	rs2255901;rs2862954	2	rs2255901;rs2862954
APOA	8	rs2275545	107651526	4.3722e-38	107554534	107672365	71	5	5	rs2230808;rs2066714;rs72732679;rs2275545;rs1800978	5	rs2230808;rs2066714;rs72732679;rs2275545;rs1800978
HDL	18	rs77960347	47109955	1.86552e-36	46567678	47138901	15	2	2	rs41469449;rs77960347	2	rs41469449;rs77960347
URT	11	rs71456318	64332862	7.55092e-36	64313291	64582108	93	4	4	rs71456318;rs11231825;rs77231260;rs2071313	3	rs71456318;rs77231260;rs2071313
ALP	16	rs2236653	126283785	9.94718e-36	126270841	126293285	29	2	2	rs2298475;rs2236653	2	rs2298475;rs2236653
TRIG	9	rs7412	45412079	6.19584e-35	45388500	45426792	14	2	2	rs157581;rs7412	2	rs157581;rs7412
APOB	13	rs1532625	57005301	7.89769e-35	56995236	57005479	14	1	1	rs1532625	1	rs1532625
ALB	6	rs2305744	35556123	2.05353e-34	35545278	35556357	10	1	1	rs2305744	1	rs2305744
CRP	2	rs6694817	154401972	3.66438e-33	154351995	154627852	120	4	4	rs79794939;rs6694817;rs6664608;rs9427094	4	rs79794939;rs6694817;rs6664608;rs9427094
HBA1C	7	rs11100802	144621199	1.59588e-31	144594291	145022433	1172	1	1	rs11100802	1	rs11100802
TBIL	5	rs6487138	20905250	4.24033e-30	20885931	21514673	286	4	4	rs16923154;rs6487138;rs2291075;rs56031203	4	rs16923154;rs6487138;rs2291075;rs56031203
HDL	6	rs2275545	107651526	1.24394e-28	107554534	107672365	70	4	4	rs2230808;rs2066714;rs2275545;rs1800978	4	rs2230808;rs2066714;rs2275545;rs1800978
SHBG	19	rs202200760	17346854	9.3994e-28	17346441	17347142	3	1	1	rs202200760	1	rs202200760
DBP	6	rs3184504	111884608	1.74221e-27	111826477	112883476	31	1	1	rs3184504	1	rs3184504
ALB	7	rs10414643	50097784	2.6903e-27	50067508	50138023	58	1	1	rs10414643	1	rs10414643
HDL	10	rs11820589	116633862	1.1246e-25	116561514	117091153	185	4	4	rs11820589;rs76836072;rs186808413;rs61905530	4	rs11820589;rs76836072;rs186808413;rs61905530
TPROT	7	rs10414643	50097784	1.56928e-25	50067508	50138023	58	1	1	rs10414643	1	rs10414643
LDL	3	rs3895559	109813020	1.70726e-25	109783648	109820919	29	2	2	rs3895559;rs6667814	2	rs3895559;rs6667814
CREA	4	rs1047891	211540507	7.37225e-25	211540507	211543055	2	1	1	rs1047891	1	rs1047891
TPROT	1	rs1801274	161479745	1.86123e-24	161463601	161703198	47	3	3	rs1801274;rs149686267;rs1875763	3	rs1801274;rs149686267;rs1875763
HBA1C	19	rs2451217	80710278	2.18877e-24	80693281	80804734	58	1	1	rs2451217	1	rs2451217
ALP	15	rs174528	61543499	2.19786e-24	61542006	61624181	60	1	1	rs174528	1	rs174528
AST	7	rs2862954	101912064	2.57988e-24	101885270	102039187	36	1	1	rs2862954	1	rs2862954
APOB	11	rs174528	61543499	3.27115e-24	61542006	61624181	60	1	1	rs174528	1	rs174528
CHO	2	rs10889335	62960101	3.53671e-24	62900811	63182135	297	1	1	rs10889335	1	rs10889335
APOA	21	rs1800961	43042364	1.02731e-23	43042364	43042364	1	1	1	rs1800961	1	rs1800961
CREA	6	rs72657825	77290561	2.37684e-23	77220837	77360431	42	1	1	rs72657825	1	rs72657825
CREA	18	rs56376587	77160235	4.03831e-23	77156103	77160235	4	1	1	rs56376587	1	rs56376587
IGF1	10	rs2854746	45960645	4.09449e-22	45954465	46010100	40	2	2	rs145188037;rs2854746	2	rs145188037;rs2854746
LDL	13	rs1532625	57005301	4.45554e-22	56995236	57005479	14	1	1	rs1532625	1	rs1532625
HDL	22	rs1800961	43042364	7.09905e-22	43042364	43042364	1	1	1	rs1800961	1	rs1800961
GGT	7	rs5400	170732300	2.49977e-21	170572112	170755713	140	1	1	rs5400	1	rs5400
APOA	10	rs539858	116729013	4.66337e-21	116561514	117163765	301	8	8	rs918144;rs76836072;rs5093;rs539858;rs186808413;rs61905530;rs500389;rs678837	7	rs918144;rs76836072;rs5093;rs539858;rs186808413;rs61905530;rs500389
ALT	4	rs2274159	117166246	5.55009e-21	117155706	117176306	24	1	1	rs2274159	1	rs2274159
ALP	22	rs1801272	41354533	1.50904e-20	41336950	41374558	28	2	2	rs1801272;rs8192725	1	rs1801272
SHBG	17	rs2233368	47293848	1.67803e-20	47244412	47513711	125	3	3	rs2233368;rs2072153;rs2233667	3	rs2233368;rs2072153;rs2233667
ALP	18	rs1169289	121416622	1.95659e-20	121392040	121424861	15	1	1	rs1169289	1	rs1169289
ALB	5	rs45505795	94756943	2.58048e-20	94612849	94847262	10	2	2	rs45505795;rs17580	2	rs45505795;rs17580
PHOS	5	rs740059	4671490	6.01866e-20	4671490	4744690	5	2	2	rs740059;rs35411407	2	rs740059;rs35411407
APOB	12	rs11820589	116633862	7.97995e-20	116581259	116662407	52	1	1	rs11820589	1	rs11820589
URT	8	rs1805100	76476396	9.07821e-20	76443380	76560454	74	1	1	rs1805100	1	rs1805100
HBA1C	12	rs13266634	118184783	9.24698e-20	118184783	118220270	8	1	1	rs13266634	1	rs13266634
PHOS	3	rs55774724	33589332	2.02535e-19	33575097	33732241	41	2	2	rs55774724;rs7759182	2	rs55774724;rs7759182
IGF1	9	rs9400239	108977663	2.39166e-19	108861264	109019323	65	1	1	rs9400239	1	rs9400239
LDL	5	rs11887534	44066247	2.74979e-19	44052743	44088041	22	1	1	rs11887534	1	rs11887534
HDL	20	rs7412	45412079	2.96415e-19	45388500	45503839	91	3	3	rs157581;rs7412;rs1132899	3	rs157581;rs7412;rs1132899
SHBG	3	rs2232015	107599258	5.47772e-19	107537916	107627697	48	1	1	rs2232015	1	rs2232015
TBIL	3	rs4379723	64963449	1.6474e-18	64874754	65365385	199	1	1	rs4379723	1	rs4379723
SHBG	6	rs9845457	135914476	2.14388e-18	135914476	135914715	2	1	1	rs9845457	1	rs9845457
HBA1C	3	rs6757461	175300997	2.44625e-18	175214266	175324074	69	1	1	rs6757461	1	rs6757461
CREA	1	rs35995150	113264930	2.8655e-18	113255456	113268546	9	1	1	rs35995150	1	rs35995150
TBIL	6	rs3184504	111884608	4.69029e-18	111826477	112883476	31	1	1	rs3184504	1	rs3184504
IGF1	12	rs55772007	102545563	5.09096e-18	102394872	102958964	431	2	2	rs2271266;rs55772007	2	rs2271266;rs55772007
CREA	15	rs111653425	19474875	1.54739e-17	19474875	19474875	1	1	1	rs111653425	1	rs111653425
TRIG	6	rs174528	61543499	1.69317e-17	61542006	61624181	60	1	1	rs174528	1	rs174528
CREA	7	rs2738238	39377418	1.79391e-17	39356000	39404526	51	1	1	rs2738238	1	rs2738238
ALP	25	rs9927	25277244	1.80801e-17	25202892	25602328	405	1	1	rs9927	1	rs9927
CHO	3	rs3895559	109813020	1.87154e-17	109783648	109820919	29	2	2	rs3895559;rs6667814	2	rs3895559;rs6667814
AST	4	rs470926	72364673	2.13599e-17	72097351	72406659	66	1	1	rs470926	1	rs470926
ALP	7	rs17311358	24580036	2.36483e-17	24419058	24851787	76	4	4	rs2235501;rs17311358;rs3813687;rs4074420	4	rs2235501;rs17311358;rs3813687;rs4074420
CHO	7	rs888789	74988369	3.20184e-17	74982207	75010002	10	1	1	rs888789	1	rs888789
URT	9	rs10821877	52603659	4.03181e-17	52578738	52648454	16	1	1	rs10821877	1	rs10821877
HDL	9	rs174528	61543499	4.22085e-17	61542006	61624181	60	1	1	rs174528	1	rs174528
PHOS	7	rs41278174	16259596	4.23058e-17	16256767	16284360	4	1	1	rs41278174	1	rs41278174
ALP	14	rs11601507	5701074	1.42266e-16	5701074	5701074	1	1	1	rs11601507	1	rs11601507
CREA	17	rs35619711	59482169	1.78731e-16	58898689	59490235	284	2	2	rs9899415;rs35619711	2	rs9899415;rs35619711
TPROT	6	rs2305744	35556123	1.97106e-16	35545278	35556357	10	1	1	rs2305744	1	rs2305744
CRP	6	rs1965024	51173559	2.09701e-16	51163406	51189169	17	1	1	rs1965024	1	rs1965024
PHOS	8	rs9899415	59164245	7.48514e-16	58898689	59269555	254	1	1	rs9899415	1	rs9899415
HBA1C	13	rs11795137	91606522	7.90497e-16	91557559	91607378	10	1	1	rs11795137	1	rs11795137
CHO	12	rs174528	61543499	1.00161e-15	61542006	61624181	60	1	1	rs174528	1	rs174528
CHO	5	rs11887534	44066247	1.00531e-15	44052743	44088041	22	1	1	rs11887534	1	rs11887534
HBA1C	11	rs2974339	42397529	1.10637e-15	42351176	42457590	171	1	1	rs2974339	1	rs2974339
GGT	17	rs838144	49250239	1.2933e-15	49206108	49259529	104	1	1	rs838144	1	rs838144
HDL	12	rs7138492	125324197	1.53285e-15	125282882	125325010	26	2	2	rs5888;rs7138492	2	rs5888;rs7138492
ALP	9	rs2073618	119964052	2.09074e-15	119858126	120011118	49	1	1	rs2073618	1	rs2073618
SHBG	1	rs17360994	27278573	2.10572e-15	26994245	27325532	202	1	1	rs17360994	1	rs17360994
URT	1	rs2075570	155182164	2.55976e-15	155123837	155197462	23	1	1	rs2075570	1	rs2075570
AST	3	rs11714515	58410431	2.91944e-15	58314687	58516383	176	2	2	rs11714515;rs4387990	2	rs11714515;rs4387990
CRP	9	rs6519133	39096602	3.31742e-15	38869463	39152412	284	1	1	rs6519133	1	rs6519133
APOB	6	rs11887534	44066247	3.71279e-15	44052743	44088041	22	1	1	rs11887534	1	rs11887534
APOA	12	rs7138492	125324197	4.14381e-15	125282882	125325010	26	2	2	rs5888;rs7138492	2	rs5888;rs7138492
URA	7	rs838144	49250239	4.22474e-15	49206108	49259529	104	1	1	rs838144	1	rs838144
CHO	23	rs1800961	43042364	6.09537e-15	43042364	43042364	1	1	1	rs1800961	1	rs1800961
LDL	7	rs888789	74988369	6.91831e-15	74982207	75010002	10	1	1	rs888789	1	rs888789
CHO	17	rs77960347	47109955	8.85727e-15	47106028	47109955	2	1	1	rs77960347	1	rs77960347
BMI	1	rs11676272	25141538	1.01508e-14	25075281	25291539	149	1	1	rs11676272	1	rs11676272
LDL	2	rs10889335	62960101	1.21675e-14	62900811	63182135	297	1	1	rs10889335	1	rs10889335
AST	8	rs11076256	58752466	1.32862e-14	58750869	58865022	51	1	1	rs11076256	1	rs11076256
HDL	16	rs55764662	42155742	1.42988e-14	42155742	42155742	1	1	1	rs55764662	1	rs55764662
SHBG	8	rs6850131	88226480	1.44245e-14	88157898	88228228	54	1	1	rs6850131	1	rs6850131
CAL	7	rs10455097	74493432	1.6474e-14	74437989	74573207	75	1	1	rs10455097	1	rs10455097
APOB	20	rs2073787	109694685	3.53183e-14	109682057	109940577	462	1	1	rs2073787	1	rs2073787
URT	13	rs3184504	111884608	5.15585e-14	111826477	112883476	31	1	1	rs3184504	1	rs3184504
IGF1	3	rs10178552	25973309	7.34345e-14	25932710	26105877	210	1	1	rs10178552	1	rs10178552
CHO	13	rs11820589	116633862	8.12831e-14	116581259	116662407	52	1	1	rs11820589	1	rs11820589
CAL	1	rs41287288	51760147	9.01779e-14	51125045	51933774	13	1	1	rs41287288	1	rs41287288
GGT	16	rs3744867	56149048	1.08418e-13	56138424	56149048	38	1	1	rs3744867	1	rs3744867
CREA	14	rs2047866	76136194	1.40767e-13	76136194	76347375	30	1	1	rs2047866	1	rs2047866
CAL	3	rs7599598	97351840	1.43549e-13	97351840	97463529	18	1	1	rs7599598	1	rs7599598
APOB	10	rs3798220	160961137	1.4669e-13	160687412	161123451	114	3	3	rs3798220;rs7752408;rs4252185	3	rs3798220;rs7752408;rs4252185
GGT	10	rs870992	52193237	1.50869e-13	52193125	52193237	2	1	1	rs870992	1	rs870992
DBP	7	rs167479	11526765	1.52686e-13	11526765	11526765	1	1	1	rs167479	1	rs167479
LDL	11	rs11820589	116633862	1.56892e-13	116581259	116662407	52	1	1	rs11820589	1	rs11820589
TBIL	2	rs9845457	135914476	1.77542e-13	135914476	135914715	2	1	1	rs9845457	1	rs9845457
URA	5	rs41301139	43262408	2.33346e-13	43252053	43262408	2	1	1	rs41301139	1	rs41301139
CRP	8	rs1800961	43042364	3.25162e-13	43042364	43042364	1	1	1	rs1800961	1	rs1800961
HDL	1	rs17513135	40035686	3.6467e-13	39942242	40088043	61	1	1	rs17513135	1	rs17513135
VITD	1	rs61816761	152285861	4.16198e-13	152285861	152285861	1	1	1	rs61816761	1	rs61816761
IGF1	20	rs762360	37425955	4.43404e-13	37364579	37467574	53	1	1	rs762360	1	rs762360
SBP	7	rs167479	11526765	5.36785e-13	11526765	11526765	1	1	1	rs167479	1	rs167479
CHO	21	rs838144	49250239	9.08866e-13	49206108	49259529	104	1	1	rs838144	1	rs838144
URT	15	rs7174918	99251356	1.11532e-12	99248018	99295916	75	1	1	rs7174918	1	rs7174918
AST	5	rs2274159	117166246	1.21116e-12	117155706	117176306	24	1	1	rs2274159	1	rs2274159
IGF1	18	rs395782	10426628	1.2249e-12	10332988	10437954	5	2	2	rs2116942;rs395782	2	rs2116942;rs395782
SHBG	7	rs2699426	3478323	1.50938e-12	3258321	3482678	17	2	2	rs114303452;rs2699426	2	rs114303452;rs2699426
TRIG	3	rs7607980	165551201	1.5188e-12	165502911	165687186	46	2	2	rs7607980;rs6414069	2	rs7607980;rs6414069
GGT	11	rs4084164	62201458	1.52651e-12	62200735	62201458	2	1	1	rs4084164	1	rs4084164
ALP	24	rs36656	54664752	2.10329e-12	54664209	54677189	10	1	1	rs36656	1	rs36656
IGF1	16	rs142039417	61988614	3.08816e-12	61649170	61988614	3	1	1	rs142039417	1	rs142039417
LDL	9	rs4252185	161123451	3.36744e-12	160687412	161123451	114	3	3	rs3798220;rs7752408;rs4252185	3	rs3798220;rs7752408;rs4252185
ALT	7	rs3744867	56149048	3.62493e-12	56138424	56149048	38	1	1	rs3744867	1	rs3744867
SHBG	16	rs3760370	45695832	4.01236e-12	45385012	45791123	304	1	1	rs3760370	1	rs3760370
HBA1C	6	rs5400	170732300	4.44324e-12	170572112	170755713	140	1	1	rs5400	1	rs5400
CREA	2	rs7598901	73675844	4.46992e-12	73552542	74051360	360	1	1	rs7598901	1	rs7598901
URA	6	rs56376587	77160235	5.16654e-12	77156103	77160235	4	1	1	rs56376587	1	rs56376587
SBP	1	rs5068	11905974	5.64417e-12	11827796	11905974	19	1	1	rs5068	1	rs5068
LDL	6	rs1229984	100239319	6.25029e-12	100239319	100239319	1	1	1	rs1229984	1	rs1229984
CAL	10	rs2305744	35556123	7.12853e-12	35545278	35556357	10	1	1	rs2305744	1	rs2305744
CAL	6	rs4917	186337713	7.46621e-12	186332182	186342060	10	1	1	rs4917	1	rs4917
ALB	1	rs2699426	3478323	7.88678e-12	3470486	3482678	14	1	1	rs2699426	1	rs2699426
ALT	1	rs6676143	16528218	8.84301e-12	16514343	16528600	12	1	1	rs6676143	1	rs6676143
HDL	17	rs2292644	76394449	9.83785e-12	76377482	76406170	71	1	1	rs2292644	1	rs2292644
SHBG	21	rs3746575	43058096	1.04833e-11	43040569	43058096	21	1	1	rs3746575	1	rs3746575
APOB	8	rs888789	74988369	1.13789e-11	74982207	75010002	10	1	1	rs888789	1	rs888789
ALP	13	rs72636977	290891	1.25285e-11	285936	332798	22	2	2	rs72636977;rs34481144	2	rs72636977;rs34481144
ALT	9	rs75439392	44377221	1.32495e-11	44324558	44397144	45	1	1	rs75439392	1	rs75439392
HBA1C	10	rs7823698	41577121	1.69161e-11	41553233	41588675	25	1	1	rs7823698	1	rs7823698
IGF1	6	rs1229984	100239319	1.89322e-11	100239319	100239319	1	1	1	rs1229984	1	rs1229984
SBP	4	rs1801253	115805056	1.90327e-11	115789375	115805056	5	1	1	rs1801253	1	rs1801253
APOB	19	rs2076148	39788855	1.9593e-11	39656342	39970544	106	1	1	rs2076148	1	rs2076148
URT	14	rs2047866	76136194	1.9593e-11	76136194	76347375	30	1	1	rs2047866	1	rs2047866
ALB	3	rs470926	72364673	2.23152e-11	72097351	72406659	66	1	1	rs470926	1	rs470926
AST	10	rs75439392	44377221	2.44625e-11	44324558	44397144	45	1	1	rs75439392	1	rs75439392
CREA	16	rs1136201	37879588	2.92079e-11	37879588	37879588	1	1	1	rs1136201	1	rs1136201
ALP	10	rs34755188	104433255	2.92213e-11	104247135	104433255	5	1	1	rs34755188	1	rs34755188
ALP	6	rs3775327	148985720	3.18713e-11	148979174	148988399	19	1	1	rs3775327	1	rs3775327
IGF1	13	rs62020666	43026625	3.43716e-11	42917387	43259081	5	1	1	rs62020666	1	rs62020666
GGT	4	rs2075570	155182164	3.60496e-11	155123837	155197462	23	1	1	rs2075570	1	rs2075570
TPROT	4	rs174528	61543499	3.77833e-11	61542006	61624181	60	1	1	rs174528	1	rs174528
CHO	6	rs1229984	100239319	4.17061e-11	100239319	100239319	1	1	1	rs1229984	1	rs1229984
ALP	3	rs6664608	154479670	4.23058e-11	154432877	154518610	46	1	1	rs6664608	1	rs6664608
SHBG	20	rs2305744	35556123	4.23545e-11	35545278	35556357	10	1	1	rs2305744	1	rs2305744
ALP	4	rs4148776	169870882	4.37119e-11	169835168	169890428	78	1	1	rs4148776	1	rs4148776
SHBG	13	rs8017377	24883887	4.60257e-11	24871530	24883887	11	1	1	rs8017377	1	rs8017377
VITD	5	rs62128766	48337812	4.75445e-11	48332914	48389363	80	1	1	rs62128766	1	rs62128766
APOB	1	rs2072931	25747399	4.95336e-11	25580095	25863694	232	1	1	rs2072931	1	rs2072931
APOB	15	rs1801689	64210580	5.69771e-11	64195431	64305051	5	1	1	rs1801689	1	rs1801689
HDL	2	rs7607980	165551201	5.80631e-11	165502911	165558215	13	1	1	rs7607980	1	rs7607980
HBA1C	15	rs1635553	48375568	6.07156e-11	48375475	48545791	23	1	1	rs1635553	1	rs1635553
IGF1	15	rs9783783	30078492	6.60541e-11	29970857	30118345	68	1	1	rs9783783	1	rs9783783
ALP	5	rs10009145	100047929	7.39946e-11	99986316	100136182	58	1	1	rs10009145	1	rs10009145
LDL	20	rs2076148	39788855	7.45247e-11	39656342	39970544	106	1	1	rs2076148	1	rs2076148
APOA	3	rs693	21232195	7.75354e-11	21217490	21259562	9	1	1	rs693	1	rs693
CREA	5	rs10935453	141747640	7.81808e-11	141658316	141825598	65	1	1	rs10935453	1	rs10935453
APOA	2	rs10889335	62960101	1.03271e-10	62900811	63182135	297	1	1	rs10889335	1	rs10889335
IGF1	17	rs1801689	64210580	1.05254e-10	64195431	64305051	5	1	1	rs1801689	1	rs1801689
HBA1C	9	rs17546439	44100373	1.11076e-10	43966161	44266077	46	3	3	rs17546439;rs2268573;rs10951758	3	rs17546439;rs2268573;rs10951758
APOA	20	rs12975366	54759361	1.19072e-10	54752217	54837635	49	2	2	rs12975366;rs1761463	2	rs12975366;rs1761463
IGF1	7	rs6180	42719239	1.24291e-10	42641962	42857138	102	1	1	rs6180	1	rs6180
HBA1C	4	rs34345884	49760431	1.35494e-10	49696151	49828169	6	1	1	rs34345884	1	rs34345884
GGT	9	rs1902023	69536084	1.41723e-10	69532128	69538180	11	1	1	rs1902023	1	rs1902023
ALB	4	rs34592828	75996909	1.41831e-10	75996909	76073447	7	1	1	rs34592828	1	rs34592828
VITD	4	rs2277458	39583481	1.45375e-10	39514231	39690854	11	1	1	rs2277458	1	rs2277458
APOA	1	rs17513135	40035686	1.51231e-10	39942242	40088043	61	1	1	rs17513135	1	rs17513135
PHOS	6	rs10778520	107364873	1.67726e-10	107296041	107375551	81	1	1	rs10778520	1	rs10778520
LDL	22	rs2073787	109694685	1.7073e-10	109682057	109940577	462	1	1	rs2073787	1	rs2073787
SHBG	10	rs150539196	81399180	1.78702e-10	81386066	81426196	3	1	1	rs150539196	1	rs150539196
CHO	11	rs2275545	107651526	1.94142e-10	107638969	107672365	42	2	2	rs2275545;rs1800978	2	rs2275545;rs1800978
TPROT	3	rs34592828	75996909	2.03133e-10	75996909	76073447	7	1	1	rs34592828	1	rs34592828
SHBG	2	rs17513135	40035686	2.10615e-10	39942242	40088043	61	1	1	rs17513135	1	rs17513135
TRIG	2	rs693	21232195	2.20628e-10	21217490	21259562	9	1	1	rs693	1	rs693
APOB	18	rs838144	49250239	2.42125e-10	49206108	49259529	104	1	1	rs838144	1	rs838144
AST	1	rs6676143	16528218	2.55364e-10	16514343	16528600	12	1	1	rs6676143	1	rs6676143
LDL	14	rs12708919	71986995	2.66011e-10	71859854	71998748	29	1	1	rs12708919	1	rs12708919
LDL	19	rs838144	49250239	2.68306e-10	49206108	49259529	104	1	1	rs838144	1	rs838144
URA	2	rs1047891	211540507	2.80414e-10	211540507	211543055	2	1	1	rs1047891	1	rs1047891
URA	4	rs9491699	127471533	2.99826e-10	127436064	127532807	102	1	1	rs9491699	1	rs9491699
APOA	7	rs2293889	116599199	3.03159e-10	116464988	116639474	176	1	1	rs2293889	1	rs2293889
APOB	14	rs12708919	71986995	3.13495e-10	71859854	71998748	29	1	1	rs12708919	1	rs12708919
GGT	19	rs6519133	39096602	3.18625e-10	38869463	39152412	284	1	1	rs6519133	1	rs6519133
SHBG	18	rs1801689	64210580	3.30941e-10	64195431	64305051	5	1	1	rs1801689	1	rs1801689
CHO	10	rs4252185	161123451	3.66429e-10	160687412	161123451	23	2	2	rs3798220;rs4252185	2	rs3798220;rs4252185
APOA	5	rs10948059	42928461	4.20959e-10	42896064	42955749	84	1	1	rs10948059	1	rs10948059
AST	9	rs12975366	54759361	4.2714e-10	54752217	54759666	6	1	1	rs12975366	1	rs12975366
CHO	19	rs7250893	19625547	4.49935e-10	19373689	19657632	170	1	1	rs7250893	1	rs7250893
LDL	8	rs9370867	16145325	4.57288e-10	16113321	16145325	10	1	1	rs9370867	1	rs9370867
ALP	19	rs4296139	95275576	4.69862e-10	95256305	95288085	12	1	1	rs4296139	1	rs4296139
SBP	3	rs10786156	96014622	4.71542e-10	96009182	96069405	24	1	1	rs10786156	1	rs10786156
LDL	10	rs174528	61543499	4.8549e-10	61542006	61624181	60	1	1	rs174528	1	rs174528
SBP	6	rs7177338	91428636	5.55904e-10	91412850	91429042	11	1	1	rs7177338	1	rs7177338
CHO	15	rs9604573	114542858	5.83351e-10	114541849	114554256	23	1	1	rs9604573	1	rs9604573
SBP	2	rs3828589	32713327	6.79751e-10	32689773	32716474	31	1	1	rs3828589	1	rs3828589
HBA1C	5	rs6806529	123049938	7.07962e-10	123049938	123068286	15	1	1	rs6806529	1	rs6806529
CHO	16	rs12708919	71986995	7.4535e-10	71859854	71998748	29	1	1	rs12708919	1	rs12708919
GGT	8	rs2699426	3478323	7.51121e-10	3470486	3482678	14	1	1	rs2699426	1	rs2699426
HBA1C	1	rs11125393	24276736	8.30023e-10	24266361	24282995	4	1	1	rs11125393	1	rs11125393
APOA	16	rs2292644	76394449	8.63257e-10	76377482	76406170	71	1	1	rs2292644	1	rs2292644
GGT	5	rs4853574	192160839	8.6808e-10	192127335	192227797	185	1	1	rs4853574	1	rs4853574
TPROT	2	rs13421952	100721050	1.0324e-09	100576807	100796543	39	1	1	rs13421952	1	rs13421952
CREA	10	rs10821877	52603659	1.04523e-09	52578738	52648454	16	1	1	rs10821877	1	rs10821877
HDL	11	rs3184504	111884608	1.05041e-09	111826477	112883476	31	1	1	rs3184504	1	rs3184504
LDL	15	rs1801689	64210580	1.1576e-09	64195431	64305051	5	1	1	rs1801689	1	rs1801689
GGT	14	rs150952015	60884594	1.21263e-09	60883394	60884594	2	1	1	rs150952015	1	rs150952015
BMI	3	rs2076308	50791640	1.25777e-09	50750018	50941869	142	2	2	rs552393576;rs2076308	2	rs552393576;rs2076308
URT	2	rs1047891	211540507	1.28277e-09	211540507	211543055	2	1	1	rs1047891	1	rs1047891
ALP	21	rs222837	7132556	1.367e-09	7121785	7259087	15	2	2	rs222837;rs193159515	2	rs222837;rs193159515
BMI	5	rs2229616	58039276	1.40443e-09	58022640	58089477	51	1	1	rs2229616	1	rs2229616
ALT	6	rs2511403	93754508	1.50973e-09	93668071	93805190	95	1	1	rs2511403	1	rs2511403
HDL	14	rs12922835	56403323	1.69243e-09	55933331	56468941	8	1	1	rs12922835	1	rs12922835
HDL	23	rs11696196	44574533	1.78834e-09	44533106	44609007	23	1	1	rs11696196	1	rs11696196
HDL	5	rs2293889	116599199	1.82369e-09	116464988	116639474	176	1	1	rs2293889	1	rs2293889
ALP	17	rs735295	547683	1.97629e-09	525473	553239	14	1	1	rs735295	1	rs735295
ALP	2	rs72662488	22307478	2.01002e-09	22307478	22315441	2	1	1	rs72662488	1	rs72662488
DBP	4	rs1801253	115805056	2.1189e-09	115789375	115805056	5	1	1	rs1801253	1	rs1801253
HBA1C	8	rs942379	25849620	2.43921e-09	25759066	25878361	71	1	1	rs942379	1	rs942379
TBIL	4	rs12263369	94823343	2.50363e-09	94761925	94831523	36	1	1	rs12263369	1	rs12263369
CREA	11	rs11855248	41276158	2.63645e-09	41245289	41547692	218	1	1	rs11855248	1	rs11855248
SHBG	4	rs9427094	154557685	2.67276e-09	154556425	154627852	39	1	1	rs9427094	1	rs9427094
BMI	2	rs12638263	185795855	2.76956e-09	185776820	185836372	41	1	1	rs12638263	1	rs12638263
HBA1C	16	rs544034	88909376	2.8215e-09	88079817	89865171	60	1	1	rs544034	1	rs544034
ALP	8	rs62621812	127015083	2.86986e-09	127015083	127519243	3	1	1	rs62621812	1	rs62621812
APOA	15	rs55764662	42155742	3.0997e-09	42155742	42155742	1	1	1	rs55764662	1	rs55764662
DBP	1	rs5068	11905974	3.18149e-09	11827796	11905974	19	1	1	rs5068	1	rs5068
IGF1	19	rs3787500	21336825	3.20081e-09	21135726	21470454	205	1	1	rs3787500	1	rs3787500
IGF1	8	rs9362415	87968565	3.21573e-09	87814959	88098805	457	1	1	rs9362415	1	rs9362415
SHBG	14	rs45505795	94756943	3.34234e-09	94672731	94756943	3	1	1	rs45505795	1	rs45505795
GGT	15	rs2291011	74000839	3.748e-09	73950066	74005600	30	1	1	rs2291011	1	rs2291011
CHO	8	rs7724832	156381370	3.74895e-09	156367092	156482101	32	1	1	rs7724832	1	rs7724832
AST	2	rs34801630	46007846	4.17109e-09	45913521	46057819	29	1	1	rs34801630	1	rs34801630
IGF1	5	rs17848019	172224771	4.19682e-09	172215870	172236730	47	1	1	rs17848019	1	rs17848019
URA	3	rs3805497	40746885	4.8935e-09	40671099	40812873	54	1	1	rs3805497	1	rs3805497
APOB	3	rs10889335	62960101	4.90648e-09	62900811	63182135	297	1	1	rs10889335	1	rs10889335
CHO	14	rs3184504	111884608	5.06991e-09	111826477	112883476	31	1	1	rs3184504	1	rs3184504
APOA	11	rs28660993	123875394	5.25085e-09	123728979	123895263	80	1	1	rs28660993	1	rs28660993
CAL	4	rs1048603	234394487	5.29517e-09	234372429	234464941	14	1	1	rs1048603	1	rs1048603
HDL	19	rs78626055	47566647	5.65497e-09	47510840	47566647	3	1	1	rs78626055	1	rs78626055
GGT	3	rs3738055	89426902	5.88695e-09	89362299	89447978	81	1	1	rs3738055	1	rs3738055
GGT	6	rs2302507	37144535	6.53898e-09	36966449	37326663	319	1	1	rs2302507	1	rs2302507
CHO	9	rs3756772	116325142	6.54259e-09	116316103	116427814	25	1	1	rs3756772	1	rs3756772
APOB	9	rs9370867	16145325	7.16886e-09	16113321	16145325	10	1	1	rs9370867	1	rs9370867
SHBG	9	rs10755578	160969738	7.305e-09	160779134	160969738	31	1	1	rs10755578	1	rs10755578
PHOS	4	rs1044498	132172368	7.33635e-09	132157116	132195981	20	1	1	rs1044498	1	rs1044498
URT	10	rs7100474	60273121	7.38142e-09	60264741	60374898	359	1	1	rs7100474	1	rs7100474
IGF1	1	rs17360994	27278573	7.39707e-09	26994245	27325532	202	1	1	rs17360994	1	rs17360994
CAL	11	rs142888784	38810744	7.64399e-09	38692949	38810744	2	1	1	rs142888784	1	rs142888784
CHO	24	rs2073787	109694685	7.83754e-09	109682057	109940577	462	1	1	rs2073787	1	rs2073787
CREA	3	rs1128919	148657117	8.29125e-09	148457312	148956584	324	1	1	rs1128919	1	rs1128919
DBP	2	rs7605661	43625078	8.75931e-09	43582074	43766110	60	1	1	rs7605661	1	rs7605661
ALT	8	rs157581	45395714	8.76799e-09	45388500	45396665	7	1	1	rs157581	1	rs157581
BMI	4	rs879620	4015729	9.34329e-09	4013467	4024128	8	1	1	rs879620	1	rs879620
IGF1	2	rs6413830	176832552	9.59224e-09	176743400	176877581	59	1	1	rs6413830	1	rs6413830
APOB	7	rs1229984	100239319	9.93963e-09	100239319	100239319	1	1	1	rs1229984	1	rs1229984
URT	6	rs1334576	7211818	9.96483e-09	7189858	7222093	23	1	1	rs1334576	1	rs1334576
HDL	3	rs151390	103183510	1.07723e-08	103128298	103215671	43	1	1	rs151390	1	rs151390
CAL	8	rs17884869	123519112	1.08936e-08	123519112	123519112	1	1	1	rs17884869	1	rs17884869
CHO	22	rs2076148	39788855	1.15072e-08	39656342	39970544	106	1	1	rs2076148	1	rs2076148
HDL	7	rs3824627	113908060	1.16493e-08	113903510	113951375	30	1	1	rs3824627	1	rs3824627
CREA	13	rs6416452	53994493	1.18667e-08	53882828	54009231	87	1	1	rs6416452	1	rs6416452
URT	3	rs10935453	141747640	1.30098e-08	141658316	141825598	65	1	1	rs10935453	1	rs10935453
HDL	13	rs4983387	105268228	1.32853e-08	105249322	105276053	26	1	1	rs4983387	1	rs4983387
ALB	2	rs55772354	74276150	1.39836e-08	74008605	74530408	17	1	1	rs55772354	1	rs55772354
CREA	8	rs1015149	41658889	1.41664e-08	41646839	41664501	16	1	1	rs1015149	1	rs1015149
TRIG	10	rs2073787	109694685	1.4569e-08	109682057	109940577	462	1	1	rs2073787	1	rs2073787
HDL	21	rs1761463	54823533	1.65577e-08	54752217	54837635	49	2	2	rs12975366;rs1761463	2	rs12975366;rs1761463
APOA	18	rs1787299	47480660	1.72064e-08	47458464	47566647	58	3	3	rs1787299;rs58191032;rs78626055	3	rs1787299;rs58191032;rs78626055
HBA1C	17	rs871841	8216468	1.84442e-08	8125541	8220357	19	1	1	rs871841	1	rs871841
CAL	9	rs7332372	42465490	1.88521e-08	42315576	42576671	66	1	1	rs7332372	1	rs7332372
TPROT	5	rs1292053	57963537	1.9639e-08	57801761	58046076	93	1	1	rs1292053	1	rs1292053
TRIG	5	rs4379723	64963449	1.97097e-08	64874754	65365385	199	1	1	rs4379723	1	rs4379723
HDL	24	rs35164803	14929375	1.98838e-08	14929375	14929375	1	1	1	rs35164803	1	rs35164803
SHBG	12	rs1169289	121416622	2.02479e-08	121392040	121424861	15	1	1	rs1169289	1	rs1169289
LDL	17	rs117877390	19378416	2.12227e-08	19378416	19621301	3	1	1	rs117877390	1	rs117877390
ALT	2	rs6850131	88226480	2.50346e-08	88157898	88228228	54	1	1	rs6850131	1	rs6850131
ALP	20	rs8017377	24883887	2.53595e-08	24871530	24883887	11	1	1	rs8017377	1	rs8017377
CAL	2	rs2060824	61484556	2.62585e-08	61429568	61836773	31	1	1	rs2060824	1	rs2060824
CREA	9	rs711309	77539744	2.80408e-08	77293955	77598538	184	1	1	rs711309	1	rs711309
APOA	13	rs4983387	105268228	2.89801e-08	105249322	105276053	26	1	1	rs4983387	1	rs4983387
TRIG	8	rs55764662	42155742	2.90048e-08	42155742	42155742	1	1	1	rs55764662	1	rs55764662
CRP	4	rs61748115	120741382	2.96791e-08	120690511	120834377	104	1	1	rs61748115	1	rs61748115
URT	12	rs4244812	65480768	3.00448e-08	65399528	65493191	79	1	1	rs4244812	1	rs4244812
SHBG	5	rs6414069	165578581	3.32598e-08	165567076	165687186	33	1	1	rs6414069	1	rs6414069
LDL	12	rs9604573	114542858	3.54356e-08	114541849	114554256	23	1	1	rs9604573	1	rs9604573
APOA	4	rs151390	103183510	3.55918e-08	103128298	103215671	43	1	1	rs151390	1	rs151390
GGT	2	rs1198423	23735241	3.62101e-08	23734350	23813592	45	1	1	rs1198423	1	rs1198423
HDL	8	rs1801253	115805056	3.64267e-08	115789375	115805056	5	1	1	rs1801253	1	rs1801253
DBP	5	rs360157	9754221	4.08733e-08	9750757	9779277	37	1	1	rs360157	1	rs360157
CREA	19	rs6059856	33057954	4.2503e-08	32903904	33294945	247	1	1	rs6059856	1	rs6059856
PHOS	2	rs34225933	176825069	4.26648e-08	176705865	176825069	4	1	1	rs34225933	1	rs34225933
APOA	9	rs3824627	113908060	4.33251e-08	113903510	113951375	30	1	1	rs3824627	1	rs3824627
URA	1	rs2075570	155182164	4.3433e-08	155123837	155197462	23	1	1	rs2075570	1	rs2075570
LDL	21	rs1800961	43042364	4.37442e-08	43042364	43042364	1	1	1	rs1800961	1	rs1800961
DBP	3	rs10786156	96014622	4.54329e-08	96009182	96069405	24	1	1	rs10786156	1	rs10786156
IGF1	4	rs17400325	178565913	4.67165e-08	178565913	178608411	3	1	1	rs17400325	1	rs17400325
ALT	3	rs3816873	100504664	4.71292e-08	100445763	100505326	113	1	1	rs3816873	1	rs3816873
SBP	5	rs3816605	47857253	4.94197e-08	47481533	47918416	212	1	1	rs3816605	1	rs3816605

## Sheet: Table S4
Measurement	Chromosome	rsID	Position (hg19)	P-value	Start	End	N (SNPs)	N (GWAS)	Significant SNPs	Individual SNPs	N (Lead SNPs)	Lead SNPs
URT	4	rs2241474	10086015	3.7325e-304	9047584	11032357	1957	105	67	rs112583696;rs111921266;rs7686230;rs6448972;rs9684176;rs2867386;rs36055615;rs12643735;rs139854873;rs11731759;rs143790062;rs73218799;rs183203239;rs77796046;rs80204783;rs115079764;rs78785836;rs16891020;rs151246458;rs116658821;rs115050662;rs147170567;rs62296002;rs61795156;rs34788376;rs10939741;rs149766750;rs147350938;rs114847096;rs62286289;rs115793604;rs139539281;rs143826374;rs148633069;rs2241474;rs…	36	rs112583696;rs111921266;rs12643735;rs139854873;rs11731759;rs80204783;rs16891020;rs116658821;rs147170567;rs62296002;rs34788376;rs114847096;rs115793604;rs139539281;rs148633069;rs2241474;rs568988378;rs139042212;rs76903922;rs114766978;rs62286325;rs56292253;rs4698002;rs6823622;rs11737588;rs79987947;rs188503477;rs77999810;rs79954247;rs78139294;rs2012249;rs997219;rs75686099;rs76285604;rs148838662;rs1460…
TBIL	1	rs17868322	234580494	2.48886e-282	233965459	234930311	491	66	63	rs61591958;rs10199994;rs2289476;rs75656635;rs145966524;rs75528846;rs532039315;rs2305538;rs2276566;rs13002340;rs838563;rs115700531;rs75820995;rs13011156;rs3965793;rs540948010;rs114667609;rs17863752;rs13394291;rs75507430;rs2602372;rs182860728;rs141571693;rs17862855;rs181488881;rs12471546;rs17863775;rs17868322;rs34707303;rs17863786;rs4233633;rs55781538;rs193018729;rs17868337;rs62191951;rs139257330;r…	48	rs61591958;rs10199994;rs2289476;rs75656635;rs145966524;rs2305538;rs838563;rs115700531;rs75820995;rs3965793;rs540948010;rs114667609;rs17863752;rs13394291;rs75507430;rs2602372;rs17862855;rs12471546;rs17863775;rs17868322;rs34707303;rs17863786;rs4233633;rs55781538;rs17868337;rs139257330;rs17862876;rs55891750;rs12474441;rs144621281;rs1500481;rs759173;rs12053445;rs189692848;rs17868360;rs62192269;rs1156…
ALP	1	rs149344982	21889760	4.79733e-239	21029696	22315441	153	17	16	rs79484271;rs11577605;rs2102945;rs116307748;rs1697421;rs12047949;rs75059470;rs1262265;rs1130564;rs149344982;rs9426769;rs10917025;rs829409;rs9426772;rs12742048;rs75200282	15	rs79484271;rs11577605;rs2102945;rs116307748;rs1697421;rs12047949;rs75059470;rs1262265;rs149344982;rs9426769;rs10917025;rs829409;rs9426772;rs12742048;rs75200282
SHBG	17	rs4151134	7347123	4.01791e-198	7083646	7983012	244	20	19	rs11650232;rs56360822;rs4796412;rs1554948;rs4151134;rs8080690;rs12937543;rs11078698;rs191963994;rs9893249;rs17881850;rs12938947;rs75839667;rs56217607;rs4130668;rs72841437;rs62623385;rs76138007;rs28510139	19	rs11650232;rs56360822;rs4796412;rs1554948;rs4151134;rs8080690;rs12937543;rs11078698;rs191963994;rs9893249;rs17881850;rs12938947;rs75839667;rs56217607;rs4130668;rs72841437;rs62623385;rs76138007;rs28510139
ALP	13	rs616154	136150466	4.21697e-186	135956539	136402239	220	25	24	rs139744322;rs4962096;rs35775139;rs7862461;rs140167248;rs141535538;rs4962108;rs71503180;rs75685923;rs78755596;rs141429199;rs34039247;rs9411500;rs8176689;rs3094375;rs500499;rs79147081;rs616154;rs11244032;rs61751475;rs62575995;rs72779222;rs55710199;rs116856166	17	rs139744322;rs4962096;rs35775139;rs7862461;rs140167248;rs4962108;rs71503180;rs78755596;rs34039247;rs8176689;rs500499;rs616154;rs61751475;rs62575995;rs72779222;rs55710199;rs116856166
VITD	2	rs222035	72621674	1.46893e-146	72559546	73554194	614	20	18	rs146624520;rs79444700;rs139868816;rs72651017;rs7665177;rs222035;rs842872;rs10022720;rs10937986;rs10938008;rs111978854;rs72645662;rs147264346;rs149897068;rs114204813;rs137874093;rs113209890;rs4694507	9	rs146624520;rs79444700;rs139868816;rs222035;rs111978854;rs72645662;rs147264346;rs137874093;rs4694507
APOB	20	rs113345881	45431636	2.19786e-146	44296689	45721596	231	23	22	rs62116988;rs143777867;rs55840997;rs62116889;rs2722698;rs112027066;rs8104660;rs2965174;rs2965169;rs10419669;rs111794050;rs3852861;rs79701229;rs116881820;rs5117;rs405509;rs113345881;rs146390218;rs11669173;rs7259567;rs375594987;rs8100419	19	rs62116988;rs143777867;rs62116889;rs112027066;rs8104660;rs2965174;rs2965169;rs10419669;rs111794050;rs3852861;rs79701229;rs116881820;rs405509;rs113345881;rs146390218;rs11669173;rs7259567;rs375594987;rs8100419
HDL	18	rs5880	57015091	7.34514e-144	56677666	57076115	116	18	18	rs148970147;rs75281121;rs80082308;rs148931404;rs149754235;rs7205421;rs34136389;rs79968526;rs377719564;rs7200805;rs4783961;rs9924087;rs5880;rs5882;rs1566439;rs1875236;rs16965150;rs158482	17	rs148970147;rs75281121;rs80082308;rs149754235;rs7205421;rs34136389;rs79968526;rs377719564;rs7200805;rs4783961;rs9924087;rs5880;rs5882;rs1566439;rs1875236;rs16965150;rs158482
AST	9	rs1926736	17891705	3.78443e-139	17644214	18344751	129	11	11	rs12768517;rs12416367;rs41277356;rs45489291;rs10218900;rs2477669;rs1926736;rs35160301;rs78159125;rs943329;rs2488112	9	rs12768517;rs12416367;rs45489291;rs10218900;rs2477669;rs1926736;rs78159125;rs943329;rs2488112
LDL	14	rs10412048	11193949	1.39637e-122	10739265	11277232	207	10	10	rs1541596;rs74942924;rs117834294;rs75162188;rs36005514;rs10412048;rs10422256;rs72658867;rs73013176;rs10469364	8	rs1541596;rs74942924;rs75162188;rs36005514;rs10412048;rs10422256;rs72658867;rs10469364
CRP	1	rs4655764	66126159	1.40281e-122	65904886	66385385	304	7	7	rs11590603;rs11208683;rs6672331;rs4655764;rs4278348;rs6701146;rs6695557	5	rs11590603;rs6672331;rs4655764;rs6701146;rs6695557
ALP	28	rs492602	49206417	5.57186e-118	49168942	49261613	74	2	2	rs492602;rs3826821	2	rs492602;rs3826821
GGT	17	rs11624069	103563547	2.83792e-114	103259551	103614513	35	4	4	rs35459127;rs11624069;rs2183193;rs150854933	4	rs35459127;rs11624069;rs2183193;rs150854933
APOB	18	rs10412048	11193949	4.97737e-110	10739265	11277232	146	8	8	rs1541596;rs74942924;rs117834294;rs10412048;rs10422256;rs72658867;rs73013176;rs10469364	6	rs1541596;rs74942924;rs10412048;rs10422256;rs72658867;rs10469364
CRP	9	rs5117	45418790	8.27942e-110	45384931	45421650	40	4	4	rs79701229;rs405509;rs5117;rs116881820	3	rs79701229;rs405509;rs5117
CRP	3	rs11265263	159710517	2.64241e-102	159181869	159726586	119	17	14	rs141737681;rs2325917;rs115984621;rs145663198;rs149913193;rs35485101;rs12760385;rs1446976;rs17459069;rs2794519;rs113188187;rs11265260;rs11265263;rs115585839	12	rs141737681;rs2325917;rs115984621;rs145663198;rs35485101;rs1446976;rs17459069;rs2794519;rs113188187;rs11265260;rs11265263;rs115585839
CHO	14	rs10412048	11193949	3.17907e-97	10739265	11277232	193	8	8	rs74942924;rs117834294;rs75162188;rs10412048;rs10422256;rs72658867;rs73013176;rs10469364	6	rs74942924;rs75162188;rs10412048;rs10422256;rs72658867;rs10469364
LDL	1	rs11591147	55505647	2.20496e-94	55470153	55723817	41	6	6	rs2479418;rs2495489;rs11591147;rs12732125;rs7551981;rs1759499	4	rs2479418;rs2495489;rs11591147;rs7551981
SHBG	11	rs7924036	65191645	3.7145e-93	64761091	65474912	475	10	7	rs4545434;rs10822109;rs7910827;rs79962861;rs7924036;rs10995583;rs7093334	4	rs4545434;rs7910827;rs7924036;rs7093334
PHOS	1	rs1697421	21823292	3.22107e-89	21786068	22048891	33	4	4	rs1697421;rs1130564;rs151192254;rs10799708	4	rs1697421;rs1130564;rs151192254;rs10799708
APOA	17	rs5880	57015091	2.2269e-88	56677666	57076115	61	11	11	rs148970147;rs75281121;rs80082308;rs149754235;rs34136389;rs7200805;rs4783961;rs5880;rs5882;rs1875236;rs158482	11	rs148970147;rs75281121;rs80082308;rs149754235;rs34136389;rs7200805;rs4783961;rs5880;rs5882;rs1875236;rs158482
HBA1C	19	rs7909192	71124228	6.55541e-88	71054102	71302731	40	8	7	rs117872282;rs7914134;rs6480394;rs7909192;rs7912524;rs2084274;rs138843369	6	rs117872282;rs7914134;rs6480394;rs7909192;rs2084274;rs138843369
APOB	2	rs11591147	55505647	3.81066e-86	55470153	55723817	32	5	5	rs2479418;rs11591147;rs12732125;rs7551981;rs1759499	3	rs2479418;rs11591147;rs7551981
HDL	9	rs4128744	19919655	2.01558e-85	19547919	19976053	258	13	11	rs4921667;rs6586867;rs28522810;rs190118115;rs7000494;rs4335137;rs4128744;rs74737417;rs73667498;rs13263508;rs116974927	10	rs4921667;rs6586867;rs28522810;rs190118115;rs7000494;rs4335137;rs4128744;rs73667498;rs13263508;rs116974927
TRIG	12	rs4128744	19919655	1.32038e-84	19727932	19976053	197	10	8	rs28522810;rs190118115;rs7000494;rs4335137;rs4128744;rs74737417;rs13263508;rs116974927	7	rs28522810;rs190118115;rs7000494;rs4335137;rs4128744;rs13263508;rs116974927
APOB	6	rs952275	21221399	1.57979e-83	21094034	21694451	40	5	5	rs7583126;rs952275;rs312030;rs6739502;rs11897825	5	rs7583126;rs952275;rs312030;rs6739502;rs11897825
CRP	6	rs2258043	121451425	6.18871e-76	121042944	121610411	188	12	9	rs71454665;rs4298983;rs2567990;rs11611673;rs2258043;rs2708081;rs618482;rs17434647;rs73405652	6	rs71454665;rs4298983;rs11611673;rs2258043;rs2708081;rs17434647
CHO	1	rs11591147	55505647	8.59409e-76	55470153	55723817	30	5	5	rs2479418;rs2495489;rs11591147;rs12732125;rs7551981	4	rs2479418;rs2495489;rs11591147;rs7551981
TRIG	13	rs2954021	126482077	3.30217e-75	126475770	126568355	44	2	2	rs2954021;rs2100462	2	rs2954021;rs2100462
GGT	26	rs186765281	25010855	3.59253e-75	24241101	25217890	255	12	10	rs5751792;rs11090305;rs9612549;rs75779601;rs118133842;rs145444539;rs73152509;rs16978740;rs186765281;rs5760687	10	rs5751792;rs11090305;rs9612549;rs75779601;rs118133842;rs145444539;rs73152509;rs16978740;rs186765281;rs5760687
LDL	16	rs111794050	45302778	5.06058e-74	45022560	45503839	177	14	14	rs62116889;rs112027066;rs8104660;rs2965174;rs2965169;rs111794050;rs3852861;rs79701229;rs116881820;rs5117;rs405509;rs113345881;rs146390218;rs11669173	13	rs62116889;rs112027066;rs8104660;rs2965174;rs2965169;rs111794050;rs3852861;rs79701229;rs116881820;rs405509;rs113345881;rs146390218;rs11669173
IGF1	13	rs856567	46721448	5.17845e-69	46357931	46876267	98	4	4	rs79276073;rs60270726;rs856567;rs34512209	3	rs79276073;rs60270726;rs856567
ALP	14	rs10822143	64887856	5.27716e-68	64761091	65474912	456	7	4	rs10822143;rs10995583;rs10822109;rs4545434	1	rs10822143
APOA	16	rs17821316	58703069	1.56315e-60	58632415	58765397	54	11	11	rs62001697;rs12900738;rs78893833;rs60808669;rs17821316;rs72740858;rs11857386;rs35511894;rs17269250;rs79447951;rs79787170	11	rs62001697;rs12900738;rs78893833;rs60808669;rs17821316;rs72740858;rs11857386;rs35511894;rs17269250;rs79447951;rs79787170
ALP	6	rs793668	24439196	6.96947e-60	23686757	24580768	318	24	20	rs138799960;rs1340698;rs6910514;rs560402318;rs139184544;rs7752761;rs73726632;rs72830895;rs115901482;rs72828936;rs146279568;rs114966185;rs6918194;rs793668;rs2817240;rs145169613;rs62401919;rs143001479;rs115960026;rs149313571	11	rs138799960;rs139184544;rs7752761;rs72830895;rs146279568;rs114966185;rs793668;rs145169613;rs62401919;rs143001479;rs149313571
VITD	3	rs112072036	14561519	1.28499e-58	14012335	15126262	409	14	10	rs10766163;rs10832164;rs192650338;rs16930180;rs112072036;rs543746207;rs4281505;rs117290792;rs117595077;rs78110496	8	rs10766163;rs192650338;rs16930180;rs112072036;rs4281505;rs117290792;rs117595077;rs78110496
TPROT	4	rs71632979	161526397	2.01372e-53	161399920	161703198	106	3	3	rs71632979;rs1801274;rs11585450	2	rs71632979;rs11585450
TRIG	1	rs1168002	62934308	1.77787e-52	62900811	63375116	319	3	3	rs1168002;rs4915853;rs2780873	1	rs1168002
PHOS	3	rs73743304	33649461	1.24194e-51	33619555	33769611	92	3	3	rs73743304;rs2229643;rs75874733	2	rs73743304;rs2229643
TRIG	10	rs35732917	73013269	2.63451e-51	71621836	73122923	112	10	7	rs2074754;rs182118140;rs35732917;rs799160;rs6956879;rs36100458;rs71553276	4	rs2074754;rs182118140;rs35732917;rs36100458
GGT	16	rs2258043	121451425	1.63644e-50	121042944	121601893	191	12	8	rs71454665;rs4298983;rs11065387;rs2258043;rs2708081;rs661647;rs17434647;rs73405652	6	rs71454665;rs4298983;rs11065387;rs2258043;rs2708081;rs17434647
TBIL	6	rs73079474	21340207	7.96893e-50	20866813	21791062	343	20	17	rs73069318;rs117474805;rs11045532;rs1910181;rs117071055;rs73062454;rs76151543;rs116980448;rs111677829;rs73079474;rs10841769;rs12231212;rs117924672;rs117038277;rs1910202;rs532727118;rs146219397	12	rs73069318;rs117474805;rs11045532;rs117071055;rs73062454;rs76151543;rs116980448;rs111677829;rs73079474;rs10841769;rs117924672;rs532727118
LDL	5	rs952275	21221399	1.09396e-49	21094034	21259562	22	2	2	rs7583126;rs952275	2	rs7583126;rs952275
CHO	16	rs111794050	45302778	1.11148e-48	45173951	45478352	84	9	9	rs8104660;rs2965169;rs111794050;rs79701229;rs116881820;rs5117;rs405509;rs113345881;rs146390218	8	rs8104660;rs2965169;rs111794050;rs79701229;rs116881820;rs405509;rs113345881;rs146390218
APOB	13	rs2954021	126482077	2.87872e-47	126475770	126500031	31	1	1	rs2954021	1	rs2954021
URT	5	rs2725244	89068761	1.08468e-46	88591554	89097477	77	3	3	rs114323258;rs72875499;rs2725244	3	rs114323258;rs72875499;rs2725244
HDL	16	rs17821316	58703069	7.58927e-46	58632415	58765397	44	8	8	rs62001697;rs12900738;rs60808669;rs17821316;rs72740858;rs11857386;rs35511894;rs79787170	8	rs62001697;rs12900738;rs60808669;rs17821316;rs72740858;rs11857386;rs35511894;rs79787170
HBA1C	14	rs3757840	44231216	3.52777e-43	44189023	44279570	27	4	4	rs2284776;rs3757840;rs79784692;rs78454627	4	rs2284776;rs3757840;rs79784692;rs78454627
VITD	4	rs1790324	71150520	5.56416e-43	71130343	71239298	152	3	2	rs138659167;rs1790324	2	rs138659167;rs1790324
APOA	10	rs4128744	19919655	5.77963e-43	19793581	19974789	177	7	6	rs190118115;rs7000494;rs4335137;rs4128744;rs74737417;rs13263508	5	rs190118115;rs7000494;rs4335137;rs4128744;rs13263508
TRIG	15	rs519794	116859453	2.31846e-42	116535126	117156893	176	17	12	rs2105610;rs192957064;rs1263151;rs61907566;rs7126214;rs140231532;rs181009570;rs519794;rs116995028;rs144018203;rs186782888;rs187929675	9	rs2105610;rs192957064;rs1263151;rs7126214;rs140231532;rs519794;rs144018203;rs186782888;rs187929675
LDL	7	rs3846662	74651084	6.09116e-42	74354422	75010002	403	5	4	rs3846662;rs10942739;rs888789;rs10462511	1	rs3846662
TRIG	21	rs5117	45418790	2.35559e-41	45411941	45436657	18	2	2	rs5117;rs113345881	1	rs5117
IGF1	16	rs1004446	2170143	1.04882e-37	2168375	2198479	9	2	2	rs1004446;rs117693013	2	rs1004446;rs117693013
GGT	1	rs6676143	16528218	1.92442e-37	16442847	16734436	59	4	4	rs924202;rs4661714;rs6676143;rs6603859	3	rs924202;rs4661714;rs6676143
CAL	5	rs6768471	121979704	6.20297e-37	121415714	122309510	131	10	9	rs1915091;rs74729891;rs147969266;rs6768471;rs9834975;rs34371877;rs139632291;rs1127343;rs7612244	6	rs1915091;rs74729891;rs6768471;rs34371877;rs1127343;rs7612244
URT	12	rs7929308	64329106	3.56041e-36	64313291	64584231	98	6	6	rs7929308;rs561193;rs68036074;rs77231260;rs559566;rs75944694	5	rs7929308;rs68036074;rs77231260;rs559566;rs75944694
CHO	7	rs3846662	74651084	4.09261e-36	74354422	75010002	403	5	4	rs3846662;rs10942739;rs888789;rs10462511	1	rs3846662
CRP	8	rs17616063	51436882	4.17734e-36	51158710	51485354	23	3	3	rs10521222;rs2052285;rs17616063	3	rs10521222;rs2052285;rs17616063
HDL	19	rs72836561	41926126	1.10205e-35	41776943	42197409	8	3	3	rs72836561;rs147438979;rs76868109	1	rs72836561
IGF1	19	rs12313279	102846504	3.31818e-35	102407432	102863979	46	1	1	rs12313279	1	rs12313279
CHO	5	rs952275	21221399	5.09096e-35	21094034	21259562	22	2	2	rs7583126;rs952275	2	rs7583126;rs952275
SHBG	20	rs12937634	47444442	6.88494e-35	47322746	47515176	104	3	2	rs12937634;rs2584652	2	rs12937634;rs2584652
ALP	9	rs2954021	126482077	8.08165e-35	126475770	126500031	31	1	1	rs2954021	1	rs2954021
TRIG	19	rs116843064	8429323	3.77833e-34	8429323	8429323	1	1	1	rs116843064	1	rs116843064
LDL	11	rs2954021	126482077	1.12746e-33	126475770	126500031	31	1	1	rs2954021	1	rs2954021
CRP	2	rs6687726	154400320	1.4713e-33	154293925	154662203	180	6	5	rs1386821;rs6687726;rs79219014;rs4382717;rs9427116	5	rs1386821;rs6687726;rs79219014;rs4382717;rs9427116
CREA	5	rs2870238	77373079	3.63413e-33	77357592	77440333	26	2	2	rs2870238;rs11097396	1	rs2870238
HBA1C	10	rs28556782	145051940	4.55827e-33	144452466	145129466	151	12	5	rs4599354;rs9997101;rs11735662;rs79753544;rs28556782	3	rs4599354;rs11735662;rs28556782
APOB	8	rs3846662	74651084	1.59735e-32	74354422	75010002	403	5	4	rs3846662;rs10942739;rs888789;rs10462511	1	rs3846662
APOB	4	rs17645031	109834938	1.02141e-31	109692641	110162190	90	8	8	rs610249;rs4268379;rs138361368;rs113905406;rs651649;rs17645031;rs629001;rs56079255	7	rs610249;rs4268379;rs138361368;rs651649;rs17645031;rs629001;rs56079255
HBA1C	26	rs898103	80845827	7.79292e-30	80687475	80953320	123	8	6	rs112043381;rs59574779;rs11870336;rs898103;rs62076145;rs2199111	3	rs112043381;rs898103;rs62076145
IGF1	10	rs1262542	127032008	1.53497e-29	126659043	127080700	251	1	1	rs1262542	1	rs1262542
PHOS	5	rs10849081	4597481	2.33884e-29	4597481	4744690	14	3	3	rs10849081;rs7299185;rs35411407	3	rs10849081;rs7299185;rs35411407
PHOS	4	rs365475	132055621	5.1357e-29	132003982	132200633	10	2	2	rs365475;rs7769712	2	rs365475;rs7769712
HDL	23	rs116843064	8429323	5.95388e-29	8428570	8466254	37	2	2	rs116843064;rs7252574	2	rs116843064;rs7252574
APOA	12	rs2740486	107666513	1.36207e-28	107547622	107668886	44	6	6	rs62566032;rs2297409;rs112853430;rs4742924;rs2000069;rs2740486	6	rs62566032;rs2297409;rs112853430;rs4742924;rs2000069;rs2740486
APOA	13	rs7931398	116879676	1.87672e-28	116711974	117169874	133	9	5	rs7931398;rs61907566;rs144018203;rs187929675;rs12282721	4	rs7931398;rs144018203;rs187929675;rs12282721
GGT	15	rs1248897	79680991	4.17061e-28	79526766	79712045	150	3	3	rs10762764;rs61855795;rs1248897	3	rs10762764;rs61855795;rs1248897
CHO	10	rs2954021	126482077	1.3366e-27	126475770	126500031	31	1	1	rs2954021	1	rs2954021
ALB	10	rs2607234	35563834	2.23563e-27	35545385	35563834	27	1	1	rs2607234	1	rs2607234
URT	7	rs6926383	25903235	5.23239e-26	25707171	26139933	188	5	4	rs9461209;rs198809;rs6926383;rs10946798	2	rs9461209;rs6926383
APOA	20	rs7505828	47246485	1.28973e-25	47123763	47947138	163	7	7	rs17656498;rs12958839;rs7505828;rs9675910;rs138571974;rs7228877;rs79204427	5	rs17656498;rs12958839;rs7505828;rs9675910;rs79204427
CHO	2	rs1168002	62934308	1.88495e-25	62900811	63199936	308	2	2	rs1168002;rs4915853	1	rs1168002
CREA	13	rs1706798	45611414	2.71269e-25	45545378	45857309	154	2	2	rs1706798;rs2643718	1	rs1706798
ALP	30	rs6083824	25363057	4.48952e-25	25202892	25716363	497	6	2	rs6083824;rs9927	1	rs6083824
HDL	2	rs653523	230318402	4.43711e-24	230280259	230326412	59	2	2	rs653523;rs11122400	1	rs653523
APOA	24	rs1800961	43042364	8.46058e-24	43042364	43042364	1	1	1	rs1800961	1	rs1800961
HBA1C	17	rs62547761	91518718	1.48047e-23	91392554	91607378	106	2	2	rs62547761;rs62551536	1	rs62547761
APOA	18	rs72836561	41926126	2.16272e-23	41776943	42197409	8	3	3	rs72836561;rs147438979;rs76868109	1	rs72836561
GGT	3	rs11264311	155054743	4.46581e-23	155040737	155197462	46	2	2	rs11264311;rs2990220	1	rs11264311
BMI	6	rs11075987	53815161	6.79673e-23	53797908	53842908	115	1	1	rs11075987	1	rs11075987
ALP	12	rs570071	104205038	7.34852e-23	104202803	104433255	16	2	2	rs570071;rs34755188	2	rs570071;rs34755188
HBA1C	27	rs4808579	17255734	4.2658e-22	17252151	17258614	8	1	1	rs4808579	1	rs4808579
TRIG	18	rs72836561	41926126	4.62275e-22	41776943	42197409	8	3	3	rs72836561;rs147438979;rs76868109	1	rs72836561
ALP	20	rs2298475	126278203	1.1051e-21	126203911	126293285	30	3	3	rs240541;rs2298475;rs4935968	3	rs240541;rs2298475;rs4935968
HDL	12	rs2740486	107666513	4.28154e-21	107547622	107668886	38	5	5	rs62566032;rs2297409;rs4742924;rs2000069;rs2740486	5	rs62566032;rs2297409;rs4742924;rs2000069;rs2740486
SHBG	15	rs961229	96725043	4.9136e-21	96703373	96728857	7	2	2	rs961229;rs7176909	1	rs961229
SHBG	22	rs1736185	2813000	5.91017e-21	2786397	2820105	43	1	1	rs1736185	1	rs1736185
CREA	6	rs11959928	39397132	7.49204e-21	39355591	39423907	56	1	1	rs11959928	1	rs11959928
ALT	5	rs4979376	117158886	1.06733e-20	117148430	117176306	25	1	1	rs4979376	1	rs4979376
HBA1C	24	rs837763	88853729	1.12564e-20	88837243	88864102	14	1	1	rs837763	1	rs837763
HDL	25	rs1800961	43042364	1.47265e-20	43042364	43042364	1	1	1	rs1800961	1	rs1800961
CAL	4	rs2305538	234376177	5.34934e-20	234296650	234464941	22	3	2	rs2305538;rs2971860	2	rs2305538;rs2971860
ALT	6	rs4917896	102039463	1.29867e-19	101522170	102049300	296	6	4	rs7082141;rs7906181;rs56145646;rs4917896	3	rs7082141;rs56145646;rs4917896
CAL	10	rs10795701	9314364	1.77215e-19	9295292	9356436	55	2	2	rs10795701;rs72788346	2	rs10795701;rs72788346
HBA1C	1	rs863365	158551329	1.7791e-19	158435250	158615702	337	3	1	rs863365	1	rs863365
CREA	10	rs4744712	71434707	3.05985e-19	71397747	71475381	16	1	1	rs4744712	1	rs4744712
HDL	22	rs7505828	47246485	3.76444e-19	47123763	47947138	122	7	7	rs17656498;rs12958839;rs7505828;rs138571974;rs9675910;rs79204427;rs78626055	5	rs17656498;rs12958839;rs7505828;rs138571974;rs78626055
URA	7	rs55733296	30754837	6.5298e-19	30749169	30754837	2	1	1	rs55733296	1	rs55733296
LDL	3	rs17645031	109834938	8.65566e-19	109692641	110036634	79	6	6	rs610249;rs4268379;rs138361368;rs651649;rs17645031;rs629001	6	rs610249;rs4268379;rs138361368;rs651649;rs17645031;rs629001
URA	4	rs137976175	40908575	1.48252e-18	40908575	40908575	1	1	1	rs137976175	1	rs137976175
GGT	13	rs35732917	73013269	2.35288e-18	72856430	73042614	65	1	1	rs35732917	1	rs35732917
IGF1	12	rs1496499	45979023	5.12979e-18	45955029	46010100	43	1	1	rs1496499	1	rs1496499
URT	1	rs1471633	145723739	6.73287e-18	145719488	145725689	10	1	1	rs1471633	1	rs1471633
ALT	4	rs56899077	145996452	6.99198e-18	145645812	146167575	147	4	3	rs66716313;rs56899077;rs6988314	2	rs66716313;rs56899077
APOA	3	rs653523	230318402	9.8107e-18	230280259	230326412	59	2	2	rs653523;rs11122400	1	rs653523
IGF1	2	rs10798489	176935711	1.23396e-17	176743400	176935711	71	2	2	rs7544010;rs10798489	2	rs7544010;rs10798489
LDL	6	rs4076834	44081627	1.72147e-17	44052743	44088041	23	1	1	rs4076834	1	rs4076834
CHO	15	rs187429064	19380513	2.37794e-17	19320825	19657632	175	2	2	rs187429064;rs4808959	2	rs187429064;rs4808959
HBA1C	25	rs2073284	76117401	2.72647e-17	76116496	76123528	7	3	3	rs2073284;rs3794738;rs3813027	3	rs2073284;rs3794738;rs3813027
HDL	11	rs2954021	126482077	3.86278e-17	126288007	126500031	35	2	2	rs17318886;rs2954021	2	rs17318886;rs2954021
GGT	18	rs7166370	60959089	4.88652e-17	60909414	60979812	24	2	2	rs339985;rs7166370	2	rs339985;rs7166370
GGT	24	rs492602	49206417	5.38022e-17	49168942	49250239	71	1	1	rs492602	1	rs492602
URT	9	rs2943593	76481795	7.73036e-17	76455407	76560454	61	2	1	rs2943593	1	rs2943593
HDL	15	rs838880	125261593	8.25658e-17	125259562	125293619	35	2	2	rs838880;rs1672907	2	rs838880;rs1672907
GGT	9	rs10066749	31055026	8.77607e-17	31055026	31060577	11	1	1	rs10066749	1	rs10066749
LDL	10	rs55730499	161005610	1.02707e-16	160569782	161123451	33	4	3	rs9295122;rs117733303;rs55730499	3	rs9295122;rs117733303;rs55730499
TPROT	12	rs140011902	50026735	1.21731e-16	49978447	50224245	103	4	4	rs60746284;rs73056079;rs140011902;rs10413792	3	rs60746284;rs140011902;rs10413792
CREA	11	rs55733296	30754837	1.29987e-16	30749090	30777014	53	2	2	rs55733296;rs10767873	2	rs55733296;rs10767873
ALB	11	rs140011902	50026735	1.95884e-16	49978447	50224245	103	4	4	rs60746284;rs73056079;rs140011902;rs10413792	3	rs60746284;rs140011902;rs10413792
ALP	8	rs7016223	120056819	2.33938e-16	119707109	120063542	173	4	2	rs78397456;rs7016223	2	rs78397456;rs7016223
LDL	15	rs187429064	19380513	2.57751e-16	19320825	19855549	6	2	2	rs187429064;rs117414940	1	rs187429064
LDL	4	rs514230	234858597	3.19669e-16	234842856	234876434	28	1	1	rs514230	1	rs514230
HBA1C	21	rs1562444	92715849	5.12979e-16	92666563	92727089	38	2	2	rs12222793;rs1562444	2	rs12222793;rs1562444
SHBG	23	rs55959020	17301935	7.40287e-16	17301935	17301935	1	1	1	rs55959020	1	rs55959020
SHBG	13	rs7972145	103477476	7.62255e-16	103421047	103556972	37	1	1	rs7972145	1	rs7972145
TRIG	4	rs71441063	27444546	7.80369e-16	27404674	28276643	180	8	5	rs71441063;rs115640879;rs113407226;rs76898938;rs13013484	4	rs71441063;rs113407226;rs76898938;rs13013484
HBA1C	2	rs17712208	214150445	9.05733e-16	214150445	214168806	4	1	1	rs17712208	1	rs17712208
HBA1C	4	rs13430620	169768891	1.12954e-15	169702635	169781530	11	2	2	rs13430620;rs491443	2	rs13430620;rs491443
HDL	7	rs4731701	130430930	1.36333e-15	130422934	130466854	58	1	1	rs4731701	1	rs4731701
IGF1	9	rs2490272	108895386	1.67803e-15	108861264	109005588	41	1	1	rs2490272	1	rs2490272
PHOS	8	rs41278174	16259596	1.6819e-15	16256767	16284360	4	1	1	rs41278174	1	rs41278174
LDL	2	rs1168002	62934308	1.9333e-15	62900811	63199936	308	2	2	rs1168002;rs4915853	1	rs1168002
AST	5	rs478575	72339109	2.33077e-15	72097351	72406659	66	2	1	rs478575	1	rs478575
SHBG	7	rs7684895	88208266	2.52872e-15	88157898	88228228	54	1	1	rs7684895	1	rs7684895
URA	11	rs492602	49206417	3.67451e-15	49168942	49250239	71	1	1	rs492602	1	rs492602
TBIL	4	rs10822143	64887856	3.92193e-15	64874754	65357438	196	3	1	rs10822143	1	rs10822143
URT	15	rs8032477	99254554	3.93097e-15	99248018	99296459	60	1	1	rs8032477	1	rs8032477
APOB	12	rs55730499	161005610	5.77963e-15	160569782	161123451	33	4	3	rs9295122;rs117733303;rs55730499	3	rs9295122;rs117733303;rs55730499
CHO	6	rs4076834	44081627	6.01174e-15	44052743	44088041	23	1	1	rs4076834	1	rs4076834
APOB	5	rs514230	234858597	7.92866e-15	234842856	234876434	28	1	1	rs514230	1	rs514230
CHO	4	rs514230	234858597	8.49767e-15	234842856	234876434	28	1	1	rs514230	1	rs514230
CHO	9	rs55730499	161005610	8.84912e-15	160569782	161123451	33	4	3	rs9295122;rs117733303;rs55730499	3	rs9295122;rs117733303;rs55730499
ALT	3	rs2954021	126482077	1.13214e-14	126475770	126500031	31	1	1	rs2954021	1	rs2954021
APOB	7	rs4076834	44081627	1.22857e-14	44052743	44088041	23	1	1	rs4076834	1	rs4076834
CRP	10	rs1800961	43042364	1.37151e-14	43042364	43042364	1	1	1	rs1800961	1	rs1800961
ALP	26	rs314252	7092506	1.72147e-14	7009309	7161628	64	7	7	rs12951306;rs2053595;rs314246;rs4558460;rs11650232;rs314252;rs222837	6	rs12951306;rs2053595;rs4558460;rs11650232;rs314252;rs222837
AST	3	rs11714515	58410431	1.93464e-14	58221822	58516383	446	5	4	rs4681678;rs11714515;rs6445967;rs4387990	3	rs4681678;rs11714515;rs4387990
GGT	22	rs3744867	56149048	2.31633e-14	56138424	56149048	38	1	1	rs3744867	1	rs3744867
GGT	8	rs7662070	146809017	2.5698e-14	146756490	146821725	26	1	1	rs7662070	1	rs7662070
HBA1C	22	rs4760699	48619044	2.72207e-14	48375475	48780228	39	5	3	rs4760699;rs7134565;rs1621710	2	rs4760699;rs7134565
ALP	16	rs17779355	103928374	2.78676e-14	103550281	104380686	185	3	2	rs17779355;rs11591780	2	rs17779355;rs11591780
TPROT	9	rs9797203	16851054	3.11172e-14	16839901	16857177	11	1	1	rs9797203	1	rs9797203
TRIG	7	rs4711750	43757082	3.59749e-14	43757082	43764551	5	1	1	rs4711750	1	rs4711750
SHBG	18	rs77454872	45509496	3.91021e-14	45385012	45786452	295	3	1	rs77454872	1	rs77454872
URT	2	rs2990220	155190254	4.91813e-14	155161168	155197462	22	1	1	rs2990220	1	rs2990220
BMI	2	rs12466350	25239969	5.17369e-14	25075281	25340610	199	2	2	rs12466350;rs7580081	1	rs12466350
ALP	21	rs2258043	121451425	5.31741e-14	121429194	121452249	7	1	1	rs2258043	1	rs2258043
GGT	23	rs7247349	33887160	6.20155e-14	33818892	34022842	47	3	3	rs7247349;rs10417565;rs10445598	1	rs7247349
CRP	11	rs6519133	39096602	1.07795e-13	38869463	39152412	284	1	1	rs6519133	1	rs6519133
DBP	3	rs167479	11526765	1.12435e-13	11526765	11526765	1	1	1	rs167479	1	rs167479
HBA1C	16	rs7004796	42450170	1.48423e-13	42351311	42457590	166	2	1	rs7004796	1	rs7004796
HDL	14	rs144018203	116916060	1.55704e-13	116711974	117156893	98	4	3	rs7931398;rs144018203;rs187929675	3	rs7931398;rs144018203;rs187929675
HBA1C	15	rs7823698	41577121	1.61027e-13	41238247	41629885	46	4	4	rs72643865;rs72640317;rs7823698;rs7009778	3	rs72643865;rs7823698;rs7009778
CRP	5	rs56341434	113868990	1.83527e-13	113838102	113871158	59	1	1	rs56341434	1	rs56341434
IGF1	5	rs13317803	172177764	2.09363e-13	172168292	172227766	38	3	3	rs13317803;rs1131535;rs62281226	2	rs13317803;rs62281226
HBA1C	5	rs1584063	12266855	2.61999e-13	12264122	12294202	15	1	1	rs1584063	1	rs1584063
URA	10	rs41301139	43262408	2.90737e-13	43206985	43262408	19	2	2	rs1484873;rs41301139	2	rs1484873;rs41301139
HBA1C	8	rs5396	170744815	3.11172e-13	170602655	170744815	56	2	2	rs5396;rs6792686	1	rs5396
CREA	18	rs12940987	59269257	3.19007e-13	59232365	59498250	97	2	2	rs12940987;rs9905140	2	rs12940987;rs9905140
ALP	10	rs7842602	145651888	3.32506e-13	145641328	145671931	67	1	1	rs7842602	1	rs7842602
APOB	19	rs187429064	19380513	3.48739e-13	19320825	19855549	6	2	2	rs187429064;rs117414940	1	rs187429064
IGF1	23	rs76708468	62206299	3.59667e-13	60985030	62206299	13	3	3	rs142039417;rs138786406;rs76708468	2	rs142039417;rs76708468
APOA	2	rs140584594	110232983	4.20339e-13	110232910	110233229	4	1	1	rs140584594	1	rs140584594
SHBG	3	rs11688492	64865804	5.07925e-13	64865804	64993045	30	2	2	rs11688492;rs4671611	2	rs11688492;rs4671611
CREA	21	rs6088618	33409350	6.70502e-13	32903904	33795623	415	4	3	rs6088618;rs6088744;rs12480410	1	rs6088618
SHBG	4	rs856662	136668625	7.04855e-13	135807609	136671504	411	2	2	rs856662;rs711972	1	rs856662
HBA1C	13	rs13194491	27037080	7.49204e-13	26668278	27941387	20	2	1	rs13194491	1	rs13194491
ALP	25	rs9941279	79738834	8.21297e-13	79726206	79753625	20	1	1	rs9941279	1	rs9941279
CHO	8	rs4704826	156392082	8.3888e-13	156367092	156482101	32	1	1	rs4704826	1	rs4704826
CAL	6	rs2518136	186337827	9.28539e-13	186330462	186345289	18	1	1	rs2518136	1	rs2518136
HBA1C	23	rs438674	113405997	9.84691e-13	113373490	113445602	93	1	1	rs438674	1	rs438674
TPROT	7	rs9989163	103235012	1.00277e-12	103235012	103239630	6	1	1	rs9989163	1	rs9989163
IGF1	11	rs1474296	166340770	1.02164e-12	166262523	166341870	16	2	2	rs1474296;rs6922489	1	rs1474296
CREA	9	rs2954021	126482077	1.04568e-12	126475770	126500031	31	1	1	rs2954021	1	rs2954021
URA	2	rs451900	64793661	1.28617e-12	64736577	64801187	89	1	1	rs451900	1	rs451900
DBP	2	rs1265565	111715197	1.32251e-12	111708458	112939853	470	3	3	rs1265565;rs4766897;rs7294902	2	rs1265565;rs7294902
HBA1C	18	rs41299234	70672804	1.34184e-12	70335645	70730440	11	3	2	rs41299234;rs41278520	1	rs41299234
APOA	1	rs1168002	62934308	1.46825e-12	62900811	63199936	308	2	2	rs1168002;rs4915853	1	rs1168002
SBP	5	rs167479	11526765	1.59441e-12	11526765	11526765	1	1	1	rs167479	1	rs167479
CREA	15	rs4886755	76298132	1.80593e-12	76136194	76347375	30	1	1	rs4886755	1	rs4886755
AST	13	rs13055235	44400149	1.85695e-12	44396533	44400149	2	1	1	rs13055235	1	rs13055235
URT	11	rs55733296	30754837	2.1717e-12	30749169	30754837	2	1	1	rs55733296	1	rs55733296
ALP	11	rs13283193	5626112	2.81125e-12	5626112	5638878	5	1	1	rs13283193	1	rs13283193
BMI	1	rs62104180	466003	2.93562e-12	408713	466003	5	1	1	rs62104180	1	rs62104180
CHO	20	rs1800961	43042364	3.22775e-12	43042364	43042364	1	1	1	rs1800961	1	rs1800961
HDL	3	rs2673127	227134379	3.322e-12	227129473	227183246	25	1	1	rs2673127	1	rs2673127
SHBG	1	rs17162387	27293356	3.32889e-12	26994245	27325532	202	1	1	rs17162387	1	rs17162387
ALB	1	rs10007119	3473066	3.35815e-12	3469328	3482678	17	2	2	rs10937926;rs10007119	2	rs10937926;rs10007119
TRIG	16	rs151291132	44842210	3.61327e-12	43933941	44947434	21	1	1	rs151291132	1	rs151291132
HDL	4	rs34592089	102926923	3.81329e-12	102702364	103001649	6	1	1	rs34592089	1	rs34592089
CHO	3	rs17645031	109834938	3.83796e-12	109769358	110036634	71	4	4	rs4268379;rs138361368;rs651649;rs17645031	4	rs4268379;rs138361368;rs651649;rs17645031
SHBG	6	rs10007119	3473066	4.20243e-12	3470486	3482678	14	1	1	rs10007119	1	rs10007119
APOB	15	rs5880	57015091	4.41672e-12	56994894	57017319	4	2	2	rs4783961;rs5880	2	rs4783961;rs5880
IGF1	20	rs151291132	44842210	4.52481e-12	43933941	44947434	21	1	1	rs151291132	1	rs151291132
APOA	15	rs838880	125261593	4.60681e-12	125259562	125293619	35	2	2	rs838880;rs1672907	2	rs838880;rs1672907
CAL	1	rs113487566	51599038	4.68274e-12	50632695	51933774	15	5	1	rs113487566	1	rs113487566
APOA	22	rs405509	45408836	4.89215e-12	45396899	45503839	97	2	2	rs405509;rs11669173	2	rs405509;rs11669173
CAL	3	rs7599598	97351840	6.60846e-12	97351840	97463529	18	1	1	rs7599598	1	rs7599598
ALB	7	rs151291132	44842210	6.7733e-12	43933941	44947434	83	2	2	rs151291132;rs2012384	1	rs151291132
IGF1	15	rs7393121	5268003	8.12456e-12	5236982	5320780	32	1	1	rs7393121	1	rs7393121
APOA	8	rs9462860	42947013	8.73575e-12	42896064	42955749	89	2	2	rs9462860;rs2234185	1	rs9462860
ALP	29	rs36656	54664752	9.09076e-12	54664209	54677189	10	1	1	rs36656	1	rs36656
ALP	17	rs72636977	290891	9.83558e-12	285936	298316	10	1	1	rs72636977	1	rs72636977
HBA1C	12	rs1541988	25950804	1.19042e-11	25851533	26085807	141	3	2	rs1541988;rs1971508	1	rs1541988
CHO	17	rs492602	49206417	1.30047e-11	49168942	49250239	71	1	1	rs492602	1	rs492602
CREA	19	rs8091180	77164243	1.34927e-11	77157432	77164385	4	1	1	rs8091180	1	rs8091180
APOA	21	rs116843064	8429323	1.37753e-11	8428570	8466254	37	2	2	rs116843064;rs7252574	2	rs116843064;rs7252574
TRIG	11	rs4731701	130430930	1.56819e-11	130422934	130466854	58	1	1	rs4731701	1	rs4731701
CHO	12	rs11857386	58721168	1.64059e-11	58688467	58742731	18	2	2	rs17821316;rs11857386	2	rs17821316;rs11857386
CREA	2	rs9678093	73691144	1.82978e-11	73564570	74051360	345	3	1	rs9678093	1	rs9678093
HBA1C	3	rs55921927	43848935	1.88669e-11	43598160	43850357	299	1	1	rs55921927	1	rs55921927
ALB	4	rs478575	72339109	2.03236e-11	72097351	72406659	66	2	1	rs478575	1	rs478575
ALP	7	rs7002551	9178135	2.17771e-11	9167797	9243673	37	2	2	rs7002551;rs11779019	2	rs7002551;rs11779019
HBA1C	20	rs7924080	114787012	2.56448e-11	114746580	114818772	53	1	1	rs7924080	1	rs7924080
PHOS	2	rs2305538	234376177	2.64484e-11	234296650	234463709	8	1	1	rs2305538	1	rs2305538
TBIL	2	rs856662	136668625	2.86616e-11	135936453	136671504	370	3	2	rs7621308;rs856662	2	rs7621308;rs856662
VITD	1	rs6600898	69997684	2.94374e-11	69911097	70182100	305	2	1	rs6600898	1	rs6600898
TRIG	9	rs4719841	25997536	3.22107e-11	25991977	25997536	5	1	1	rs4719841	1	rs4719841
CRP	4	rs4925659	247603463	3.44667e-11	247601357	247614617	14	1	1	rs4925659	1	rs4925659
BMI	4	rs9821675	49902544	3.69403e-11	49734229	50176259	243	3	1	rs9821675	1	rs9821675
LDL	8	rs4704826	156392082	3.87168e-11	156367092	156482101	32	1	1	rs4704826	1	rs4704826
LDL	18	rs2207132	39142516	3.98474e-11	39142516	39179822	3	1	1	rs2207132	1	rs2207132
HDL	5	rs2814949	34656722	4.24326e-11	34549699	34832661	322	4	1	rs2814949	1	rs2814949
URA	5	rs9482771	127446610	4.41672e-11	127413222	127532807	110	1	1	rs9482771	1	rs9482771
AST	7	rs4979376	117158886	4.70544e-11	117148430	117176306	25	1	1	rs4979376	1	rs4979376
APOA	9	rs4731701	130430930	5.42001e-11	130422934	130466854	58	1	1	rs4731701	1	rs4731701
HBA1C	7	rs6794886	123085359	5.48656e-11	123052990	123122314	35	1	1	rs6794886	1	rs6794886
AST	11	rs4917896	102039463	5.52459e-11	101522170	102049300	286	5	3	rs7082141;rs7906181;rs4917896	2	rs7082141;rs4917896
SHBG	21	rs1801689	64210580	5.69639e-11	64195431	64305051	5	2	1	rs1801689	1	rs1801689
CREA	8	rs1436148	23721097	5.80631e-11	23714992	23786082	72	1	1	rs1436148	1	rs1436148
APOA	4	rs952275	21221399	6.91194e-11	21217490	21259562	9	1	1	rs952275	1	rs952275
SHBG	10	rs367273	81338686	7.02425e-11	81333371	81441012	51	2	2	rs367273;rs56412759	2	rs367273;rs56412759
ALB	8	rs7502910	1638718	7.61904e-11	1622177	1651596	9	1	1	rs7502910	1	rs7502910
HDL	6	rs4711750	43757082	7.79112e-11	43757082	43764551	5	1	1	rs4711750	1	rs4711750
SHBG	8	rs9364558	160929944	7.90861e-11	160770312	160969738	59	2	1	rs9364558	1	rs9364558
SHBG	14	rs1169293	121426545	9.1791e-11	121379950	121489192	79	1	1	rs1169293	1	rs1169293
IGF1	22	rs12445517	1843331	9.27257e-11	1767426	1977807	133	4	3	rs12445517;rs142597930;rs111208266	2	rs12445517;rs142597930
APOB	25	rs6072339	39955307	1.0428e-10	39656342	39970544	108	2	1	rs6072339	1	rs6072339
IGF1	6	rs7678751	7219035	1.06933e-10	7211039	7233112	19	1	1	rs7678751	1	rs7678751
APOB	17	rs1801689	64210580	1.18217e-10	64195431	64305051	5	2	1	rs1801689	1	rs1801689
TPROT	10	rs2607234	35563834	1.49775e-10	35545385	35563834	27	1	1	rs2607234	1	rs2607234
TBIL	7	rs4766897	112179471	1.5167e-10	112072424	112896840	10	1	1	rs4766897	1	rs4766897
APOB	22	rs492602	49206417	1.55239e-10	49168942	49250239	71	1	1	rs492602	1	rs492602
ALT	1	rs6676143	16528218	1.63938e-10	16514343	16528600	12	1	1	rs6676143	1	rs6676143
ALP	19	rs174610	61627833	1.66127e-10	61625723	61641542	22	1	1	rs174610	1	rs174610
LDL	17	rs492602	49206417	1.68171e-10	49168942	49250239	71	1	1	rs492602	1	rs492602
PHOS	9	rs12940987	59269257	1.85183e-10	59232365	59287269	82	1	1	rs12940987	1	rs12940987
HDL	17	rs150911013	56418284	1.89361e-10	56389888	56418284	2	1	1	rs150911013	1	rs150911013
CHO	18	rs2207132	39142516	1.92075e-10	39142516	39179822	3	1	1	rs2207132	1	rs2207132
URT	14	rs4886755	76298132	1.92881e-10	76136194	76347375	30	1	1	rs4886755	1	rs4886755
SBP	3	rs10786156	96014622	2.28992e-10	96009182	96069405	24	1	1	rs10786156	1	rs10786156
HBA1C	30	rs9610630	37405865	2.34958e-10	37377094	37409078	43	1	1	rs9610630	1	rs9610630
CAL	14	rs2762943	52790786	2.4954e-10	52790786	52790786	1	1	1	rs2762943	1	rs2762943
ALP	22	rs9533108	43024710	2.4981e-10	42951449	43055002	51	1	1	rs9533108	1	rs9533108
HDL	8	rs7002551	9178135	2.66312e-10	9167797	9218929	34	1	1	rs7002551	1	rs7002551
APOA	23	rs12975366	54759361	2.73552e-10	54752217	54759666	6	1	1	rs12975366	1	rs12975366
URA	8	rs303936	72373889	2.79692e-10	72332750	72400259	66	1	1	rs303936	1	rs303936
CAL	9	rs2917894	74567444	2.94279e-10	74459265	74584894	86	1	1	rs2917894	1	rs2917894
GGT	25	rs374597	18437043	3.03648e-10	18416487	18479447	47	2	1	rs374597	1	rs374597
GGT	6	rs5396	170744815	3.04215e-10	170627909	170744815	45	1	1	rs5396	1	rs5396
ALT	10	rs13055235	44400149	3.61285e-10	44396533	44400149	2	1	1	rs13055235	1	rs13055235
APOB	21	rs150262789	46436564	3.94666e-10	46241332	46436564	3	1	1	rs150262789	1	rs150262789
ALP	18	rs11821656	5689144	3.94812e-10	5687562	5701281	19	1	1	rs11821656	1	rs11821656
ALB	5	rs4576329	18007152	4.04278e-10	17978828	18026304	83	1	1	rs4576329	1	rs4576329
TPROT	5	rs10865035	100835734	4.05686e-10	100576807	100857017	59	2	2	rs10865035;rs2699616	1	rs10865035
ALT	8	rs3744867	56149048	4.51024e-10	56138424	56149048	38	1	1	rs3744867	1	rs3744867
GGT	12	rs2893236	26038458	4.58553e-10	26008233	26087617	6	1	1	rs2893236	1	rs2893236
CREA	17	rs1136201	37879588	4.76497e-10	37879588	37879588	1	1	1	rs1136201	1	rs1136201
ALB	6	rs8013827	105970176	5.34232e-10	105966019	106002352	75	1	1	rs8013827	1	rs8013827
HDL	1	rs140584594	110232983	5.73707e-10	110232910	110233229	4	1	1	rs140584594	1	rs140584594
AST	12	rs12975366	54759361	6.04102e-10	54752217	54759666	6	1	1	rs12975366	1	rs12975366
APOA	14	rs11057223	123755055	6.12379e-10	123728979	123895263	79	1	1	rs11057223	1	rs11057223
URT	13	rs11820062	65429936	6.24885e-10	65372518	65555458	112	2	2	rs11820062;rs546202	1	rs11820062
GGT	21	rs12951345	36077863	6.501e-10	36074979	36082907	9	1	1	rs12951345	1	rs12951345
IGF1	17	rs35826789	66867155	7.13198e-10	66867155	67184725	12	2	1	rs35826789	1	rs35826789
URA	9	rs28465123	65579733	7.97591e-10	65578103	65581790	7	1	1	rs28465123	1	rs28465123
IGF1	7	rs722677	42748289	7.98454e-10	42641962	42857138	101	2	1	rs722677	1	rs722677
TBIL	5	rs7909192	71124228	8.27809e-10	71111231	71124228	2	1	1	rs7909192	1	rs7909192
APOA	11	rs3808457	116589497	8.32089e-10	116464988	116645056	178	1	1	rs3808457	1	rs3808457
CAL	13	rs2607234	35563834	8.56229e-10	35545385	35563834	27	1	1	rs2607234	1	rs2607234
HDL	21	rs2376583	76402105	8.85748e-10	76369480	76406184	74	1	1	rs2376583	1	rs2376583
VITD	6	rs2762943	52790786	8.95509e-10	52790786	52790786	1	1	1	rs2762943	1	rs2762943
URT	6	rs588945	72441121	9.00285e-10	72432036	72462881	84	1	1	rs588945	1	rs588945
AST	10	rs2494658	101215902	9.4317e-10	101209464	101218325	5	1	1	rs2494658	1	rs2494658
CAL	8	rs7742369	34165721	1.02254e-09	34160289	34240886	42	1	1	rs7742369	1	rs7742369
TRIG	8	rs9482771	127446610	1.02688e-09	127413222	127532807	110	1	1	rs9482771	1	rs9482771
APOA	7	rs2814949	34656722	1.06876e-09	34549699	34832661	322	4	1	rs2814949	1	rs2814949
CREA	3	rs13013419	148575688	1.10535e-09	148471406	148955901	137	4	1	rs13013419	1	rs13013419
HDL	10	rs3808457	116589497	1.13959e-09	116464988	116645056	178	1	1	rs3808457	1	rs3808457
IGF1	4	rs11545482	70315987	1.18834e-09	70271143	70315987	3	1	1	rs11545482	1	rs11545482
CREA	4	rs715049	217657102	1.24793e-09	217635847	217683836	50	1	1	rs715049	1	rs715049
LDL	19	rs6072339	39955307	1.29309e-09	39656342	39970544	108	2	1	rs6072339	1	rs6072339
HDL	13	rs174610	61627833	1.29652e-09	61625723	61641542	22	1	1	rs174610	1	rs174610
ALP	3	rs4382717	154518610	1.38248e-09	154432877	154518610	46	1	1	rs4382717	1	rs4382717
ALB	3	rs72649167	74539183	1.38612e-09	74008605	74552925	19	2	2	rs72649167;rs72647036	1	rs72649167
GGT	2	rs4233334	89147213	1.46295e-09	89119253	89447978	216	3	2	rs4233334;rs4233335	1	rs4233334
APOB	1	rs1293261	25713234	1.46646e-09	25580095	25863694	231	1	1	rs1293261	1	rs1293261
ALP	4	rs2302698	169963429	1.46872e-09	169826998	169964332	32	2	2	rs4148768;rs2302698	2	rs4148768;rs2302698
AST	2	rs112212287	45919528	1.48457e-09	45913521	46138643	31	2	1	rs112212287	1	rs112212287
TRIG	6	rs2673127	227134379	1.50262e-09	227129473	227183246	25	1	1	rs2673127	1	rs2673127
BMI	5	rs10134692	93912668	1.50442e-09	93820274	94036438	105	1	1	rs10134692	1	rs10134692
GGT	7	rs9994887	69537475	1.53049e-09	69532128	69538180	11	1	1	rs9994887	1	rs9994887
LDL	12	rs1834036	71972060	1.59056e-09	71859854	71998748	29	1	1	rs1834036	1	rs1834036
PHOS	6	rs6539288	107297862	1.65287e-09	107296041	107378724	80	2	1	rs6539288	1	rs6539288
ALP	5	rs11722561	100088737	1.67171e-09	99986316	100127311	45	2	1	rs11722561	1	rs11722561
IGF1	24	rs1801689	64210580	1.82894e-09	64195431	64305051	5	2	1	rs1801689	1	rs1801689
URA	1	rs2990220	155190254	1.8866e-09	155161168	155197462	22	1	1	rs2990220	1	rs2990220
TBIL	3	rs10950655	17308367	1.90025e-09	17281007	17309279	13	1	1	rs10950655	1	rs10950655
APOB	16	rs1834036	71972060	2.10015e-09	71859854	71998748	29	1	1	rs1834036	1	rs1834036
CREA	16	rs2252281	19437187	2.12701e-09	19426536	19443445	21	1	1	rs2252281	1	rs2252281
ALB	2	rs77849807	26152727	2.14432e-09	26152727	26152727	1	1	1	rs77849807	1	rs77849807
ALT	9	rs5117	45418790	2.1683e-09	45411941	45418790	6	1	1	rs5117	1	rs5117
LDL	13	rs1801689	64210580	2.20521e-09	64195431	64305051	5	2	1	rs1801689	1	rs1801689
URT	16	rs1477141	53361838	2.32788e-09	53356126	53361838	3	1	1	rs1477141	1	rs1477141
TRIG	2	rs11122400	230280259	2.3729e-09	230280259	230326412	59	2	2	rs11122400;rs653523	1	rs11122400
APOA	19	rs2376583	76402105	2.76325e-09	76369480	76406184	74	1	1	rs2376583	1	rs2376583
IGF1	3	rs2050525	221066985	2.80169e-09	221050400	221094967	25	1	1	rs2050525	1	rs2050525
SHBG	19	rs2546494	46959525	2.82833e-09	46957696	47047868	164	1	1	rs2546494	1	rs2546494
TRIG	3	rs952275	21221399	2.86332e-09	21217490	21259562	9	1	1	rs952275	1	rs952275
HDL	20	rs2546494	46959525	2.9692e-09	46957696	47047868	164	1	1	rs2546494	1	rs2546494
APOA	6	rs34592089	102926923	3.03138e-09	102702364	103001649	6	1	1	rs34592089	1	rs34592089
APOB	9	rs4704826	156392082	3.33618e-09	156367092	156482101	32	1	1	rs4704826	1	rs4704826
IGF1	25	rs7247198	10590508	3.35769e-09	10464687	10602180	18	3	2	rs91755;rs7247198	2	rs91755;rs7247198
IGF1	8	rs9362415	87968565	3.36946e-09	87814959	88098805	457	3	1	rs9362415	1	rs9362415
APOB	3	rs1168002	62934308	3.64914e-09	62900811	63199936	308	2	2	rs1168002;rs4915853	1	rs1168002
CHO	13	rs1834036	71972060	3.65199e-09	71859854	71998748	29	1	1	rs1834036	1	rs1834036
IGF1	18	rs10844075	32121276	3.66218e-09	32120247	32144484	6	1	1	rs10844075	1	rs10844075
ALP	27	rs4803356	41207206	3.72023e-09	41207206	41207206	1	1	1	rs4803356	1	rs4803356
GGT	27	rs6519133	39096602	3.7356e-09	38869463	39152412	284	1	1	rs6519133	1	rs6519133
APOB	23	rs2618567	17844492	4.06368e-09	17843968	17844684	4	1	1	rs2618567	1	rs2618567
TRIG	14	rs7924036	65191645	4.0693e-09	64874754	65365385	197	3	1	rs7924036	1	rs7924036
SHBG	2	rs9427116	154631123	4.31996e-09	154601157	154662203	28	1	1	rs9427116	1	rs9427116
AST	4	rs34592089	102926923	4.45379e-09	102702364	103001649	6	1	1	rs34592089	1	rs34592089
HDL	24	rs11669173	45492559	4.81249e-09	45396899	45503839	97	2	2	rs405509;rs11669173	2	rs405509;rs11669173
TPROT	1	rs7523412	25294264	5.28981e-09	25289734	25305783	55	1	1	rs7523412	1	rs7523412
CREA	20	rs1990990	33361794	5.38456e-09	33179748	33460536	145	5	3	rs1990990;rs1035478;rs7253956	2	rs1990990;rs7253956
DBP	4	rs6108787	10967214	5.60286e-09	10962185	10974785	13	1	1	rs6108787	1	rs6108787
SBP	2	rs3828591	32713108	5.84454e-09	32689773	32828846	60	2	2	rs3828591;rs1173743	2	rs3828591;rs1173743
URA	6	rs2374270	151402790	5.91998e-09	151402790	151403809	3	1	1	rs2374270	1	rs2374270
CRP	7	rs2283371	73015668	6.01243e-09	73011885	73016842	4	1	1	rs2283371	1	rs2283371
AST	6	rs4879666	33125279	6.02573e-09	33109996	33186079	46	2	1	rs4879666	1	rs4879666
TRIG	17	rs34955778	15139594	6.45996e-09	15139594	15139594	1	1	1	rs34955778	1	rs34955778
SHBG	12	rs141881700	101056213	6.65166e-09	101015655	101067606	5	1	1	rs141881700	1	rs141881700
CHO	11	rs2000069	107635869	6.9886e-09	107630433	107637306	5	1	1	rs2000069	1	rs2000069
VITD	5	rs6538696	96374683	7.12722e-09	96372026	96375682	7	1	1	rs6538696	1	rs6538696
APOB	14	rs174610	61627833	7.43961e-09	61625723	61641542	22	1	1	rs174610	1	rs174610
CREA	1	rs11102523	113261085	8.01512e-09	113252614	113263711	6	1	1	rs11102523	1	rs11102523
IGF1	14	rs205755	130580343	8.23588e-09	130580343	130580343	1	1	1	rs205755	1	rs205755
ALP	23	rs6492723	95273125	8.55756e-09	95258944	95288085	12	1	1	rs6492723	1	rs6492723
ALP	2	rs4655764	66126159	8.66842e-09	66073835	66169679	105	1	1	rs4655764	1	rs4655764
TPROT	8	rs151291132	44842210	9.20534e-09	43933941	44947434	21	1	1	rs151291132	1	rs151291132
GGT	5	rs9311400	4764171	9.2306e-09	4753712	4789051	20	1	1	rs9311400	1	rs9311400
SHBG	24	rs11574736	43039537	1.04467e-08	43038720	43054296	3	1	1	rs11574736	1	rs11574736
LDL	9	rs2235215	16131156	1.07922e-08	16114223	16131156	4	1	1	rs2235215	1	rs2235215
CREA	14	rs1461410	53984796	1.09676e-08	53882828	54009231	87	1	1	rs1461410	1	rs1461410
IGF1	21	rs1436959	62338820	1.10515e-08	62133731	62378892	209	2	1	rs1436959	1	rs1436959
CAL	7	rs11731894	40583139	1.14078e-08	40582064	40583160	6	1	1	rs11731894	1	rs11731894
URT	10	rs1658469	60292402	1.16539e-08	60264741	60374898	359	2	1	rs1658469	1	rs1658469
GGT	20	rs4888087	80490858	1.17923e-08	80417912	80506286	45	3	2	rs4888087;rs146191451	2	rs4888087;rs146191451
TPROT	6	rs4773144	110960712	1.18946e-08	110954353	110961468	7	1	1	rs4773144	1	rs4773144
IGF1	26	rs2835268	37449136	1.23583e-08	37434924	37460906	25	1	1	rs2835268	1	rs2835268
APOB	11	rs9462860	42947013	1.24125e-08	42901120	42955749	81	1	1	rs9462860	1	rs9462860
SBP	4	rs93139	9759608	1.27935e-08	9750757	9779277	37	1	1	rs93139	1	rs93139
TRIG	20	rs187429064	19380513	1.4831e-08	19320825	19458388	4	1	1	rs187429064	1	rs187429064
IGF1	1	rs17162387	27293356	1.51032e-08	26994245	27325532	202	1	1	rs17162387	1	rs17162387
CHO	19	rs3795128	39774163	1.57058e-08	39656342	39970544	106	2	1	rs3795128	1	rs3795128
AST	1	rs6676143	16528218	1.6148e-08	16514343	16528600	12	1	1	rs6676143	1	rs6676143
BMI	7	rs3897644	57729069	1.64498e-08	57728947	57782738	18	1	1	rs3897644	1	rs3897644
GGT	10	rs9368364	21905643	1.68978e-08	21898909	21912927	14	1	1	rs9368364	1	rs9368364
PHOS	7	rs12904989	51262058	1.71747e-08	51101606	51409741	123	2	1	rs12904989	1	rs12904989
SHBG	16	rs4843766	88015663	1.74683e-08	87984046	88117987	143	2	1	rs4843766	1	rs4843766
HBA1C	28	rs6086540	8603950	1.8289e-08	8602727	8609588	6	1	1	rs6086540	1	rs6086540
CREA	12	rs1717200	41368334	1.87262e-08	41245289	41556015	244	1	1	rs1717200	1	rs1717200
GGT	14	rs2954021	126482077	1.88231e-08	126475770	126500031	31	1	1	rs2954021	1	rs2954021
HBA1C	9	rs4894806	171818000	1.9059e-08	171760208	171829456	95	1	1	rs4894806	1	rs4894806
APOB	24	rs2207132	39142516	1.9128e-08	39142516	39179822	3	1	1	rs2207132	1	rs2207132
GGT	4	rs28381983	27804432	1.91885e-08	27755168	27971195	92	1	1	rs28381983	1	rs28381983
HBA1C	6	rs34345884	49760431	1.99936e-08	49696151	49828169	6	1	1	rs34345884	1	rs34345884
AST	8	rs11254509	17340342	2.1168e-08	17340342	17346743	4	1	1	rs11254509	1	rs11254509
URA	3	rs2870238	77373079	2.15224e-08	77357592	77414988	25	1	1	rs2870238	1	rs2870238
TPROT	11	rs492602	49206417	2.434e-08	49168942	49250239	71	1	1	rs492602	1	rs492602
DBP	1	rs56412759	81418949	2.44118e-08	81363534	81441012	46	1	1	rs56412759	1	rs56412759
TRIG	5	rs3769891	165602181	2.48909e-08	165558884	165635147	96	1	1	rs3769891	1	rs3769891
CREA	7	rs2374270	151402790	2.51982e-08	151402790	151403809	3	1	1	rs2374270	1	rs2374270
CAL	2	rs2990220	155190254	2.53367e-08	155161168	155197462	22	1	1	rs2990220	1	rs2990220
URT	3	rs1869026	121341281	2.53624e-08	121326297	121346579	10	1	1	rs1869026	1	rs1869026
TPROT	2	rs484959	110366083	2.71194e-08	110348657	110366391	15	1	1	rs484959	1	rs484959
URT	8	rs1436148	23721097	3.15573e-08	23714992	23786082	72	1	1	rs1436148	1	rs1436148
ALT	2	rs7684895	88208266	3.173e-08	88157898	88228228	54	1	1	rs7684895	1	rs7684895
SHBG	9	rs147085961	98029427	3.39008e-08	97847468	98029427	10	2	1	rs147085961	1	rs147085961
BMI	3	rs4672255	58898663	3.51941e-08	58866584	58991868	52	1	1	rs4672255	1	rs4672255
HBA1C	29	rs99595	55989808	3.5836e-08	55989808	55991637	3	1	1	rs99595	1	rs99595
SBP	1	rs1838209	26895947	3.62936e-08	26895947	26909432	3	1	1	rs1838209	1	rs1838209
ALB	9	rs9797203	16851054	3.75059e-08	16839901	16857177	11	1	1	rs9797203	1	rs9797203
GGT	11	rs12528678	158398815	3.75933e-08	158382987	158413879	21	1	1	rs12528678	1	rs12528678
GGT	19	rs17616063	51436882	3.93143e-08	51431230	51485354	3	1	1	rs17616063	1	rs17616063
ALP	24	rs2283371	73015668	3.96607e-08	73011885	73016842	4	1	1	rs2283371	1	rs2283371
HDL	26	rs3848715	44564682	3.97018e-08	44533106	44609007	27	1	1	rs3848715	1	rs3848715
CAL	11	rs185474100	3997689	4.26678e-08	3988288	3997689	2	1	1	rs185474100	1	rs185474100
CAL	12	rs7502910	1638718	4.33571e-08	1622177	1651596	9	1	1	rs7502910	1	rs7502910
TPROT	3	rs4845612	154358583	4.42537e-08	154324384	154389196	16	1	1	rs4845612	1	rs4845612
SHBG	5	rs6440658	149962014	4.45913e-08	149944845	149994978	29	1	1	rs6440658	1	rs6440658
APOA	5	rs2673127	227134379	4.65168e-08	227129473	227183246	25	1	1	rs2673127	1	rs2673127
APOB	10	rs2235215	16131156	4.71607e-08	16114223	16131156	4	1	1	rs2235215	1	rs2235215
ALT	7	rs4753126	93862020	4.7338e-08	93806705	93873056	32	1	1	rs4753126	1	rs4753126
ALP	15	rs522951	102110901	4.74646e-08	102106367	102115007	8	1	1	rs522951	1	rs522951
HBA1C	11	rs1927695	25378113	4.94846e-08	25370509	25396578	21	1	1	rs1927695	1	rs1927695
